# Supplementary material for: Identifying a causal link between prolactin signaling pathways and COVID-19 vaccine-induced menstrual changes
Source: PubMed Central journal article supplement (PMC10474200; doi:10.1038/s41541-023-00719-6), 2023-09-01
Supplement: 41541_2023_719_MOESM1_ESM.pdf [file 41541_2023_719_MOESM1_ESM.pdf]

## **SUPPLEMENTAL MATERIAL – Supplemental Figures**

### **Identifying a Causal link between Prolactin Signaling Pathways and COVID-19 Vaccine-induced Menstrual Changes**

Rima Hajjo<sup>1,2,3\*</sup>, Ensaf Momani<sup>4</sup>, Dima A. Sabbah<sup>1</sup>, Nancy Baker<sup>2</sup>, Alexander Tropsha<sup>2</sup>

<sup>1</sup>Department of Pharmacy, Faculty of Pharmacy, Al-Zaytoonah University of Jordan,  
P.O. Box 130 Amman 11733 Jordan.

<sup>2</sup>Laboratory for Molecular Modeling, Division of Chemical Biology and Medicinal  
Chemistry, Eshelman School of Pharmacy, The University of North Carolina at Chapel  
Hill

<sup>3</sup>Jordan CDC, Amman, Jordan.

<sup>4</sup>Al Balqa' Applied University, Faculty of Medicine, Al-Salt, Jordan

#### **\*Correspondence**

Rima Hajjo, Assistant Professor in Pharmacoinformatics and Pharmacogenetics, Al-Zaytoonah University of Jordan, Amman, Jordan; Adjunct Associate Professor, UNC-Chapel Hill, North Carolina, USA.

Email: [r.hajjo@zuj.edu.jo](mailto:r.hajjo@zuj.edu.jo) ; [hajjo@unc.edu](mailto:hajjo@unc.edu)

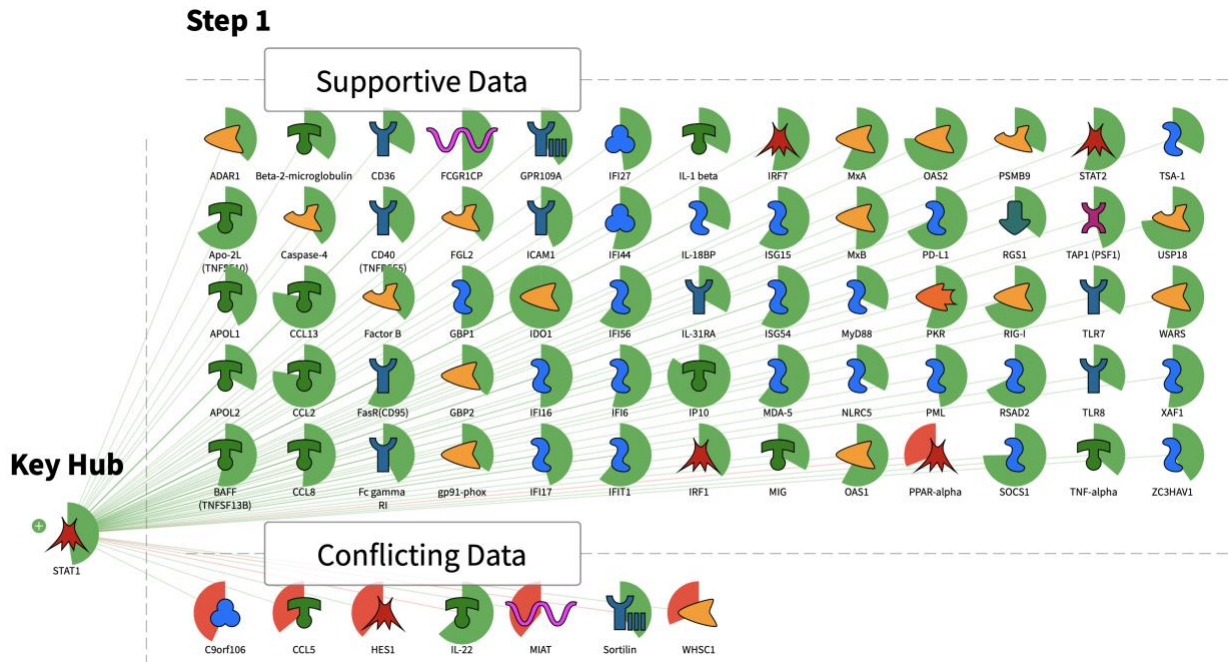

**Supplementary Fig. 1:** Causal reasoning network of high confidence transcription factor STAT1 using DEGs in GS2. Gene expression changes are shown in green and red sectors around each molecule. Increased expression value corresponds to the green sector which size increases clockwise around the molecule icon. Decreased expression value corresponds to the red sector which size increases counterclockwise. Supportive data panel contains over and under-expressed genes from the experimental data set which support a hypothesis that STAT1 is in a predicted predominant “active” state. Conflicting data panel contains over and under-expressed genes from the experimental data set which are discordant with the hypothesis that STAT1 is in predicted predominant “active” state.

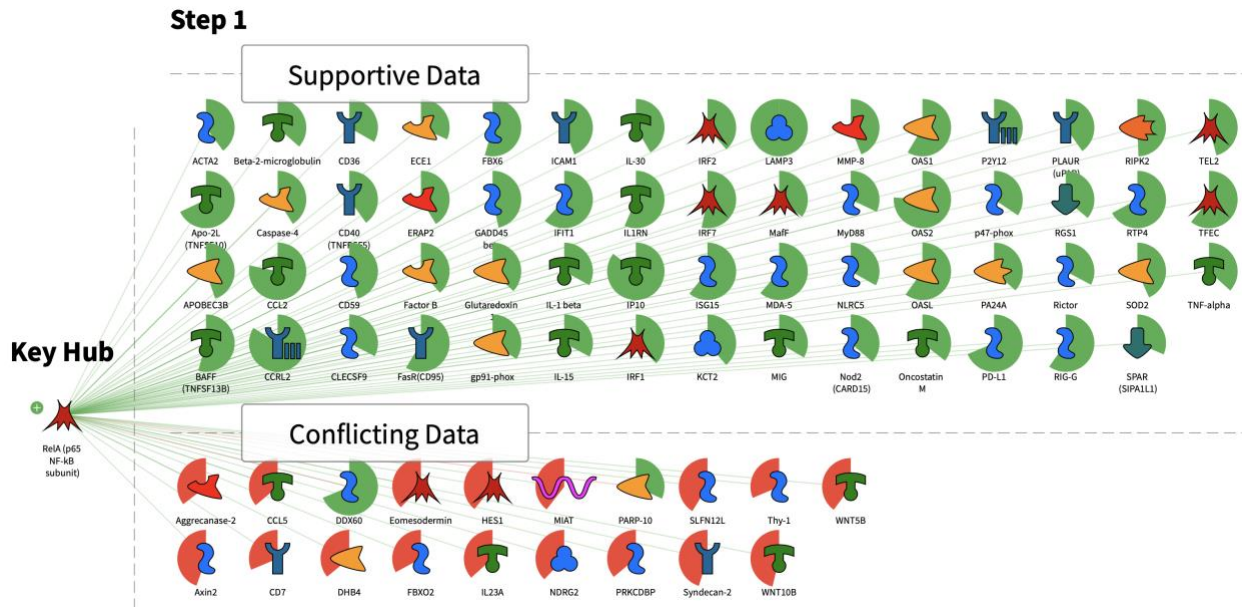

**Supplementary Fig. 2:** Causal reasoning network of high confidence transcription factor RelA using DEGs in GS2. Gene expression changes are shown in green and red sectors around each molecule. Increased expression value corresponds to the green sector which size increases clockwise around the molecule icon. Decreased expression value corresponds to the red sector which size increases counterclockwise. Supportive data panel contains over and under-expressed genes from the experimental data set which support a hypothesis that RelA is in a predicted predominant “active” state. Conflicting data panel contains over and under-expressed genes from the experimental data set which are discordant with the hypothesis that RelA is in predicted predominant “active” state.

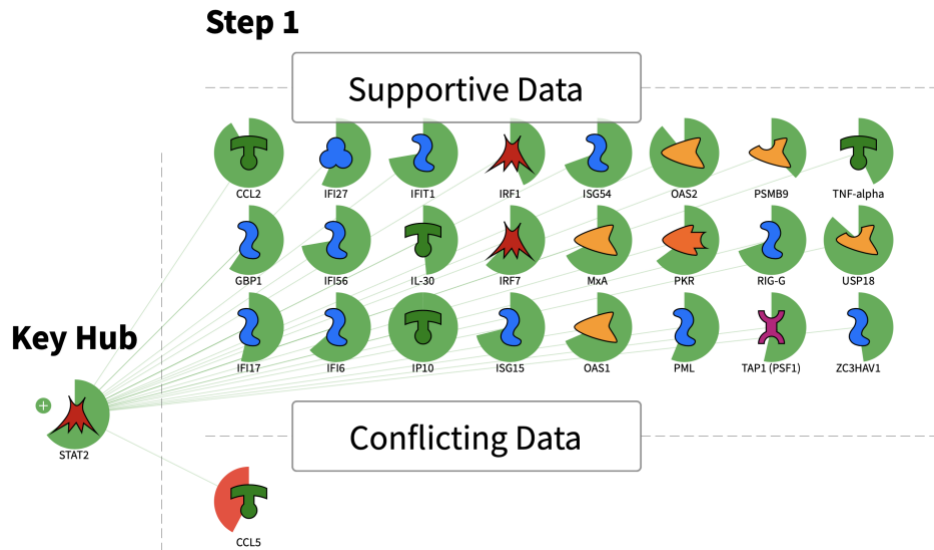

**Supplementary Fig. 3:** Causal reasoning network of high confidence transcription factor STAT2 using DEGs in GS2. Gene expression changes are shown in green and red sectors around each molecule. Increased expression value corresponds to the green sector which size increases clockwise around the molecule icon. Decreased expression value corresponds to the red sector which size increases counterclockwise. Supportive data panel contains over and under-expressed genes from the experimental data set which support a hypothesis that STAT2 is in a predicted predominant “active” state. Conflicting data panel contains over and under-expressed genes from the experimental data set which are discordant with the hypothesis that STAT2 is in predicted predominant “active” state.

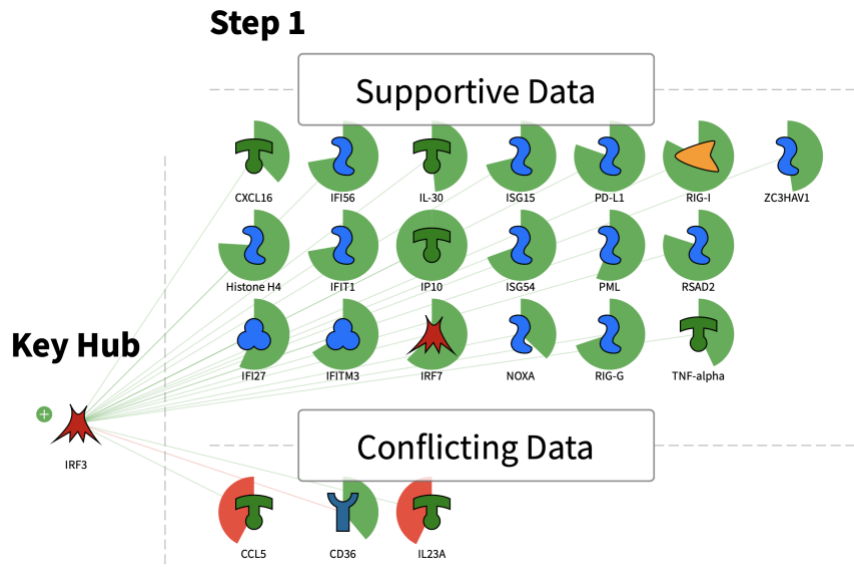

**Supplementary Fig. 4:** Causal reasoning network of high confidence transcription factor IRF3 using DEGs in GS2. Gene expression changes are shown in green and red sectors around each molecule. Increased expression value corresponds to the green sector which size increases clockwise around the molecule icon. Decreased expression value corresponds to the red sector which size increases counterclockwise. Supportive data panel contains over and under-expressed genes from the experimental data set which support a hypothesis that IRF3 is in a predicted predominant “active” state. Conflicting data panel contains over and under-expressed genes from the experimental data set which are discordant with the hypothesis that IRF3 is in predicted predominant “active” state.

## SUPPLEMENTAL MATERIAL – Supplemental Tables

### Identifying a Causal link between Prolactin Signaling Pathways and COVID-19 Vaccine-induced Menstrual Changes

Rima Hajjo<sup>1,2,3\*</sup>, Ensaf Momani<sup>4</sup>, Dima A. Sabbah<sup>1</sup>, Nancy Baker<sup>2</sup>, Alexander Tropsha<sup>2</sup>

<sup>1</sup>Department of Pharmacy, Faculty of Pharmacy, Al-Zaytoonah University of Jordan, P.O. Box 130 Amman 11733 Jordan.

<sup>2</sup>Laboratory for Molecular Modeling, Division of Chemical Biology and Medicinal Chemistry, Eshelman School of Pharmacy, The University of North Carolina at Chapel Hill

<sup>3</sup>Jordan CDC, Amman, Jordan.

<sup>4</sup>Al Balqa' Applied University, Faculty of Medicine, Al-Salt, Jordan

#### \*Correspondence

Rima Hajjo, Assistant Professor of Pharmacoinformatics and Pharmacogenetics, Al-Zaytoonah University of Jordan, Amman, Jordan; Adjunct Associate Professor, UNC-Chapel  
Email: r.hajjo@zuj.edu.jo ; hajjo@unc.edu

**Supplementary Table 1. Causal reasoning results using DEGs that has  $\log_2FC \geq 2$  or  $\leq -2$  and  $FDR \leq 0.05$ .**

| Key Hub |                   |             |                    |                                   |                             |                  |
|---------|-------------------|-------------|--------------------|-----------------------------------|-----------------------------|------------------|
| Rank    | Molecular Entity  | Gene        | Predicted Activity | Correct/Total network predictions | Activity Prediction p-value | Calcul. Distance |
| 1       | Siglec-10         | SIGLEC10    | -                  | 95/105                            | 7.927E-19                   | 3                |
| 2       | SHP-1             | PTPN6       | -                  | 93/103                            | 2.599E-18                   | 2                |
| 3       | IRp60             | CD300A      | -                  | 93/104                            | 1.243E-17                   | 3                |
| 4       | IRF1              | IRF1        | +                  | 60/62                             | 4.237E-16                   | 1                |
| 5       | miR-502-5p        | MIR502      | -                  | 66/70                             | 8.251E-16                   | 2                |
| 6       | ILT2              | LILRB1      | -                  | 112/135                           | 1.514E-15                   | 3                |
| 7       | Siglec-7          | SIGLEC7     | -                  | 112/135                           | 1.514E-15                   | 3                |
| 8       | BTLA              | BTLA        | -                  | 112/135                           | 1.514E-15                   | 3                |
| 9       | SIGLEC5           | SIGLEC5     | -                  | 112/135                           | 1.514E-15                   | 3                |
| 10      | CD244             | CD244       | -                  | 112/135                           | 1.514E-15                   | 3                |
| 11      | KIR2DL2           | KIR2DL2     | -                  | 112/135                           | 1.514E-15                   | 3                |
| 12      | CD33              | CD33        | -                  | 112/135                           | 1.514E-15                   | 3                |
| 13      | PIRB              | LILRB3      | -                  | 112/135                           | 1.514E-15                   | 3                |
| 14      | PIRB              | LOC10798746 | -                  | 112/135                           | 1.514E-15                   | 3                |
| 16      | Siglec-E          | SIGLEC9     | -                  | 112/135                           | 1.514E-15                   | 3                |
| 17      | KIR3DL1           | KIR3DL1     | -                  | 112/135                           | 1.514E-15                   | 3                |
| 18      | LIRB              |             | -                  | 112/135                           | 1.514E-15                   | 3                |
| 19      | NKG2A             | KLRC1       | -                  | 112/135                           | 1.514E-15                   | 3                |
| 20      | LAIR1             | LAIR1       | -                  | 112/135                           | 1.514E-15                   | 3                |
| 21      | KIR2DL1           | KIR2DL1     | -                  | 112/135                           | 1.514E-15                   | 3                |
| 22      | ILT4              | LILRB2      | -                  | 112/135                           | 1.514E-15                   | 3                |
| 15      | CD84              | CD84        | -                  | 112/135                           | 1.514E-15                   | 3                |
| 23      | IFNAR1            | IFNAR1      | +                  | 73/80                             | 2.898E-15                   | 3                |
| 24      | Fc gamma RII beta | FCGR2B      | -                  | 112/136                           | 4.338E-15                   | 3                |
| 25      | USP17             | USP17L26    | +                  | 71/78                             | 9.666E-15                   | 3                |
| 26      | USP17             | USP17L24    | +                  | 71/78                             | 9.666E-15                   | 3                |
| 27      | USP17             | USP17L30    | +                  | 71/78                             | 9.666E-15                   | 3                |
| 28      | USP17             | USP17L25    | +                  | 71/78                             | 9.666E-15                   | 3                |
| 29      | USP17             | USP17L29    | +                  | 71/78                             | 9.666E-15                   | 3                |
| 30      | USP17             | USP17L27    | +                  | 71/78                             | 9.666E-15                   | 3                |
| 31      | USP17             | USP17L28    | +                  | 71/78                             | 9.666E-15                   | 3                |
| 32      | RIG-I             | DDX58       | +                  | 71/78                             | 9.666E-15                   | 2                |
| 33      | IFN-alpha/beta    | IFNAR2      | +                  | 68/74                             | 1.072E-14                   | 2                |
| 34      | IFN-alpha/beta    | IFNAR1      | +                  | 68/74                             | 1.072E-14                   | 2                |
| 35      | IFN-alpha         |             | +                  | 73/81                             | 1.489E-14                   | 3                |
| 36      | IFN-beta          | IFNB1       | +                  | 73/81                             | 1.489E-14                   | 3                |
| 37      | IL-18R1           | IL18R1      | +                  | 70/77                             | 1.762E-14                   | 3                |
| 38      | IL-1RI            | IL1R1       | +                  | 70/77                             | 1.762E-14                   | 3                |
| 39      | miR-345-5p        | MIR345      | -                  | 104/126                           | 3.036E-14                   | 2                |
| 41      | IRAK1             | IRAK1       | +                  | 69/76                             | 3.209E-14                   | 2                |
| 40      | ISG15             | ISG15       | +                  | 69/76                             | 3.209E-14                   | 2                |
| 44      | RIG-G             | IFIT3       | +                  | 66/72                             | 3.628E-14                   | 2                |

|    |                |          |   |         |           |   |
|----|----------------|----------|---|---------|-----------|---|
| 42 | miR-548x-3p    | MIR548X2 | - | 66/72   | 3.628E-14 | 2 |
| 43 | miR-548x-3p    | MIR548X  | - | 66/72   | 3.628E-14 | 2 |
| 45 | CTLA-4         | CTLA4    | - | 109/134 | 5.267E-14 | 3 |
| 47 | IL-35          | EBI3     | + | 65/71   | 6.661E-14 | 3 |
| 48 | IL-35          | IL12A    | + | 65/71   | 6.661E-14 | 3 |
| 46 | miR-935        | MIR935   | - | 65/71   | 6.661E-14 | 2 |
| 49 | SHPS-1         | SIRPA    | - | 143/187 | 1.022E-13 | 3 |
| 50 | IRAKM          | IRAK3    | - | 67/74   | 1.06E-13  | 3 |
| 52 | STAT1          | STAT1    | + | 64/70   | 1.221E-13 | 1 |
| 51 | miR-383-5p     | MIR383   | - | 64/70   | 1.221E-13 | 2 |
| 53 | DOT1           | DOT1L    | + | 103/126 | 1.393E-13 | 2 |
| 55 | IRF9           | IRF9     | + | 69/77   | 1.569E-13 | 2 |
| 54 | UBE1L          | UBA7     | + | 69/77   | 1.569E-13 | 3 |
| 57 | CD69           | CD69     | + | 66/73   | 1.923E-13 | 2 |
| 56 | Polycystin     | PKD1     | + | 66/73   | 1.923E-13 | 2 |
| 59 | MGF            | KITLG    | + | 63/69   | 2.237E-13 | 3 |
| 61 | AGTR1          | AGTR1    | + | 63/69   | 2.237E-13 | 2 |
| 58 | CNOT7          | CNOT7    | - | 63/69   | 2.237E-13 | 2 |
| 60 | FasR(CD95)     | FAS      | - | 63/69   | 2.237E-13 | 2 |
| 62 | CBP/P300       | EP300    | + | 73/83   | 2.9E-13   | 2 |
| 63 | CBP/P300       | CREBBP   | + | 73/83   | 2.9E-13   | 2 |
| 64 | miR-450a-5p    | MIR450A2 | - | 82/96   | 3.621E-13 | 2 |
| 65 | miR-450a-5p    | MIR450A1 | - | 82/96   | 3.621E-13 | 2 |
| 66 | PLC-beta3      | PLCB3    | - | 103/127 | 3.73E-13  | 3 |
| 67 | PTTG3P         | PTTG3P   | + | 88/105  | 4.976E-13 | 3 |
| 68 | BCDIN3D        | BCDIN3D  | + | 67/75   | 5.049E-13 | 3 |
| 69 | SLAP           | SLA      | - | 72/82   | 5.112E-13 | 3 |
| 70 | miR-4674       | MIR4674  | - | 90/108  | 5.329E-13 | 3 |
| 71 | SNX5           | SNX5     | - | 103/128 | 9.667E-13 | 3 |
| 72 | ANKRD17        | ANKRD17  | + | 97/119  | 9.959E-13 | 3 |
| 73 | BAL            | PARP9    | + | 63/70   | 1.138E-12 | 2 |
| 74 | GHR            | GHR      | + | 100/124 | 1.597E-12 | 3 |
| 75 | IL3RA          | IL3RA    | - | 65/73   | 1.615E-12 | 3 |
| 76 | RET            | RET      | + | 83/99   | 2.195E-12 | 2 |
| 77 | IRF1           | IRF1     | + | 105/132 | 2.328E-12 | 2 |
| 78 | Rap1GAP1       | RAP1GAP  | - | 85/102  | 2.349E-12 | 3 |
| 80 | FGFR3          | FGFR3    | + | 78/92   | 3.081E-12 | 2 |
| 81 | IL-6 receptor  | IL6R     | + | 78/92   | 3.081E-12 | 2 |
| 82 | IL-6 receptor  | IL6ST    | + | 78/92   | 3.081E-12 | 2 |
| 83 | gp130          | IL6ST    | + | 78/92   | 3.081E-12 | 2 |
| 84 | IL-22 receptor | IL22RA1  | + | 78/92   | 3.081E-12 | 2 |
| 85 | IL-22 receptor | IL10RB   | + | 78/92   | 3.081E-12 | 2 |
| 79 | PTPN2          | PTPN2    | - | 78/92   | 3.081E-12 | 2 |
| 86 | Tyk2           | TYK2     | + | 82/98   | 3.69E-12  | 2 |
| 87 | XAF1           | XAF1     | + | 86/104  | 4.11E-12  | 2 |
| 88 | PPP2R2C        | PPP2R2C  | - | 134/178 | 4.527E-12 | 3 |
| 89 | CNTF           | CNTF     | + | 77/91   | 5.238E-12 | 3 |
| 90 | LIF            | LIF      | + | 77/91   | 5.238E-12 | 3 |



|     |                     |          |   |         |           |   |
|-----|---------------------|----------|---|---------|-----------|---|
| 91  | KLF5                | KLF5     | + | 121/158 | 6.494E-12 | 2 |
| 92  | c-IAP2              | BIRC3    | + | 76/90   | 8.889E-12 | 2 |
| 93  | EG1                 | MED28    | + | 134/179 | 9.101E-12 | 3 |
| 94  | G-protein alpha-s   | GNAS     | + | 127/168 | 9.79E-12  | 3 |
| 95  | alpha-4/beta-1      | ITGA4    | + | 114/148 | 1.346E-11 | 3 |
| 96  | alpha-4/beta-1      | ITGB1    | + | 114/148 | 1.346E-11 | 3 |
| 97  | miR-3941            | MIR3941  | + | 66/76   | 1.48E-11  | 3 |
| 98  | APG12               | ATG12    | - | 110/142 | 1.615E-11 | 3 |
| 99  | STAT2               | STAT2    | + | 97/122  | 1.662E-11 | 2 |
| 100 | PSMC3               | PSMC3    | + | 79/95   | 1.734E-11 | 2 |
| 101 | SGK1                | SGK1     | + | 89/110  | 1.883E-11 | 2 |
| 102 | alpha-6/beta-1      | ITGB1    | + | 72/85   | 2.314E-11 | 3 |
| 103 | alpha-6/beta-1      | ITGA6    | + | 72/85   | 2.314E-11 | 3 |
| 104 | OGG1                | OGG1     | + | 98/124  | 2.512E-11 | 2 |
| 105 | KIAA1914            | AFAP1L2  | + | 128/171 | 2.65E-11  | 3 |
| 106 | FGF21               | FGF21    | + | 80/97   | 3.004E-11 | 3 |
| 107 | miR-483-3p          | MIR483   | - | 82/100  | 3.074E-11 | 2 |
| 108 | JAK2                | JAK2     | + | 84/103  | 3.104E-11 | 2 |
| 109 | MAP2                | MAP2     | + | 124/165 | 3.401E-11 | 3 |
| 110 | NR2A                | GRIN2A   | + | 124/165 | 3.401E-11 | 3 |
| 111 | Actin               |          | + | 110/143 | 3.543E-11 | 3 |
| 112 | TNF-alpha           | TNF      | + | 142/194 | 3.796E-11 | 3 |
| 113 | HSPC142             | BABAM1   | + | 57/64   | 3.819E-11 | 3 |
| 114 | PSTPIP2             | PSTPIP2  | + | 64/74   | 4.479E-11 | 2 |
| 115 | IL6RA               | IL6R     | + | 77/93   | 4.815E-11 | 3 |
| 116 | Lnk                 | SH2B3    | - | 87/108  | 4.952E-11 | 3 |
| 117 | FISH                | SH3PXD2A | + | 123/164 | 5.13E-11  | 3 |
| 118 | LRG-47              | IRGM     | - | 100/128 | 5.476E-11 | 3 |
| 119 | miR-502-5p          | MIR502   | - | 142/195 | 7.058E-11 | 3 |
| 120 | GEFT                | ARHGEF25 | + | 103/133 | 7.26E-11  | 3 |
| 121 | PLEKHG4             | PLEKHG4  | + | 103/133 | 7.26E-11  | 3 |
| 124 | DBL                 | MCF2     | + | 103/133 | 7.26E-11  | 3 |
| 122 | RhoGAP1             | ARHGAP1  | - | 103/133 | 7.26E-11  | 3 |
| 123 | RhoGDI beta         | ARHGDIB  | - | 103/133 | 7.26E-11  | 3 |
| 125 | MSN (moesin)        | MSN      | + | 90/113  | 7.442E-11 | 3 |
| 126 | alpha-IIb/beta-3    | ITGA2B   | + | 120/160 | 8.762E-11 | 3 |
| 127 | alpha-IIb/beta-3    | ITGB3    | + | 120/160 | 8.762E-11 | 3 |
| 128 | c-Src               | SRC      | + | 123/165 | 1.02E-10  | 2 |
| 129 | AF-10               | MLLT10   | + | 131/178 | 1.144E-10 | 3 |
| 130 | Plexin A2           | PLXNA2   | + | 73/88   | 1.28E-10  | 3 |
| 131 | PDGF-R-beta         | PDGFRB   | + | 75/91   | 1.326E-10 | 2 |
| 133 | ALPHA-PIX           | ARHGEF6  | + | 122/164 | 1.526E-10 | 3 |
| 132 | G-protein alpha-i2  | GNAI2    | + | 122/164 | 1.526E-10 | 3 |
| 134 | Kalirin             | KALRN    | + | 103/134 | 1.59E-10  | 3 |
| 135 | GGTase-I            | FNTA     | + | 103/134 | 1.59E-10  | 3 |
| 136 | GGTase-I            | PGGT1B   | + | 103/134 | 1.59E-10  | 3 |
| 137 | SHP-2               | PTPN11   | - | 90/114  | 1.793E-10 | 2 |
| 138 | Ephrin-B receptor 2 | EPHB2    | + | 68/81   | 1.904E-10 | 3 |

|     |                   |          |   |         |           |   |
|-----|-------------------|----------|---|---------|-----------|---|
| 139 | Csk               | CSK      | - | 144/200 | 2.008E-10 | 3 |
| 140 | miR-345-5p        | MIR345   | - | 201/295 | 2.196E-10 | 3 |
| 141 | PHAP1 (pp32)      | ANP32A   | + | 78/96   | 2.223E-10 | 2 |
| 142 | miR-23a-3p        | MIR23A   | - | 95/122  | 2.282E-10 | 2 |
| 143 | TFG               | TFG      | + | 171/245 | 2.579E-10 | 3 |
| 144 | IL-11 receptor    | IL11RA   | + | 124/168 | 2.58E-10  | 3 |
| 145 | IL-11 receptor    | IL6ST    | + | 124/168 | 2.58E-10  | 3 |
| 146 | JNK2(MAPK9)       | MAPK9    | + | 112/149 | 2.897E-10 | 2 |
| 147 | miR-496-3p        | MIR496   | - | 117/157 | 2.974E-10 | 3 |
| 148 | MAG               | MAG      | + | 67/80   | 3.208E-10 | 3 |
| 149 | NRB54             | NONO     | + | 81/101  | 3.465E-10 | 2 |
| 150 | Intersectin       | ITSN1    | - | 92/118  | 3.874E-10 | 3 |
| 151 | KLRG1             | KLRG1    | - | 90/115  | 4.185E-10 | 3 |
| 152 | CD63              | CD63     | - | 99/129  | 4.187E-10 | 3 |
| 153 | G-protein alpha-i |          | + | 121/164 | 4.401E-10 | 3 |
| 154 | METTL3            | METTL3   | + | 104/137 | 4.655E-10 | 2 |
| 155 | PD-1              | PDCD1    | - | 140/195 | 4.904E-10 | 3 |
| 157 | p114-RhoGEF       | ARHGEF18 | + | 114/153 | 5.082E-10 | 3 |
| 156 | Ephrin-B2 (CTF2)  | EFNB2    | + | 114/153 | 5.082E-10 | 3 |
| 158 | GM-CSF receptor   | CSF2RB   | + | 82/103  | 5.348E-10 | 3 |
| 159 | GM-CSF receptor   | CSF2RA   | + | 82/103  | 5.348E-10 | 3 |
| 160 | Fyn               | FYN      | + | 66/79   | 5.391E-10 | 2 |
| 162 | Syk               | SYK      | + | 78/97   | 5.767E-10 | 2 |
| 161 | DAP12             | TYROBP   | + | 78/97   | 5.767E-10 | 3 |
| 163 | Tyro3             | TYRO3    | + | 76/94   | 5.9E-10   | 3 |
| 164 | DAB1              | DAB1     | + | 76/94   | 5.9E-10   | 3 |
| 165 | FRS2              | FRS2     | - | 89/114  | 6.576E-10 | 3 |
| 166 | PEAR1             | PEAR1    | + | 87/111  | 7.09E-10  | 3 |
| 169 | PLEKHG2           | PLEKHG2  | + | 96/125  | 7.146E-10 | 3 |
| 173 | DOCK6             | DOCK6    | + | 96/125  | 7.146E-10 | 3 |
| 176 | FARP2             | FARP2    | + | 96/125  | 7.146E-10 | 3 |
| 168 | TNFAIP2           | TNFAIP2  | + | 96/125  | 7.146E-10 | 3 |
| 172 | BIN3              | BIN3     | + | 96/125  | 7.146E-10 | 3 |
| 167 | CDGAP             | ARHGAP31 | - | 96/125  | 7.146E-10 | 3 |
| 174 | p200RhoGAP        | ARHGAP32 | - | 96/125  | 7.146E-10 | 3 |
| 175 | ABR               | ABR      | - | 96/125  | 7.146E-10 | 3 |
| 170 | SH3BP1            | SH3BP1   | - | 96/125  | 7.146E-10 | 3 |
| 171 | Porf-2            | ARHGAP39 | - | 96/125  | 7.146E-10 | 3 |
| 177 | NP14              | NOLC1    | + | 126/173 | 7.907E-10 | 3 |
| 178 | CD151             | CD151    | + | 99/130  | 8.902E-10 | 3 |
| 179 | miR-3607-5p       | SNORD138 | - | 146/206 | 9.313E-10 | 3 |
| 180 | VEGF-A            | VEGFA    | + | 75/93   | 9.577E-10 | 3 |
| 181 | LCoR (MLR2)       | LCOR     | - | 173/251 | 9.609E-10 | 3 |
| 182 | Cardiotrophin-1   | CTF1     | + | 109/146 | 9.902E-10 | 3 |
| 183 | SAD1 (USP39)      | USP39    | + | 95/124  | 1.102E-09 | 2 |
| 184 | Unc-119           | UNC119   | + | 100/132 | 1.214E-09 | 3 |
| 185 | SAP               | SH2D1A   | + | 100/132 | 1.214E-09 | 3 |
| 186 | miR-3188          | MIR3188  | - | 110/148 | 1.3E-09   | 3 |

|     |                    |           |   |         |           |   |
|-----|--------------------|-----------|---|---------|-----------|---|
| 187 | NUR77              | NR4A1     | - | 198/294 | 1.347E-09 | 3 |
| 188 | PREX1              | PREX1     | + | 103/137 | 1.45E-09  | 3 |
| 189 | Rac1               | RAC1      | + | 96/126  | 1.522E-09 | 2 |
| 190 | RhoGDI gamma       | ARHGDI3   | - | 96/126  | 1.522E-09 | 3 |
| 191 | USP1               | USP1      | + | 74/92   | 1.551E-09 | 2 |
| 192 | miR-141-5p         | MIR141    | - | 66/80   | 1.568E-09 | 3 |
| 193 | Calgranulin A      | S100A8    | + | 101/134 | 1.639E-09 | 3 |
| 194 | C/EBPbeta          | CEBPB     | + | 124/171 | 1.689E-09 | 2 |
| 195 | TSLC1              | CADM1     | + | 99/131  | 1.848E-09 | 3 |
| 196 | Cathepsin G        | CTSG      | - | 83/106  | 1.894E-09 | 3 |
| 197 | G-protein alpha-i1 | GNAI1     | - | 83/106  | 1.894E-09 | 3 |
| 198 | LARP1              | LARP1     | + | 104/139 | 1.928E-09 | 3 |
| 199 | Calgranulin B      | S100A9    | + | 181/266 | 1.956E-09 | 3 |
| 200 | FBXL7              | FBXL7     | - | 102/136 | 2.19E-09  | 3 |
| 201 | Rab-1A             | RAB1A     | + | 107/144 | 2.222E-09 | 3 |
| 202 | PTPR-zeta          | PTPRZ1    | + | 157/226 | 2.307E-09 | 3 |
| 203 | MFHAS1             | MFHAS1    | + | 75/94   | 2.409E-09 | 3 |
| 204 | Biglycan           | BGN       | + | 75/94   | 2.409E-09 | 3 |
| 205 | Glycoprotein VI    | GP6       | + | 100/133 | 2.481E-09 | 3 |
| 206 | Thy-1              | THY1      | + | 100/133 | 2.481E-09 | 3 |
| 207 | PP2A cat (alpha)   | PPP2CA    | - | 67/82   | 2.629E-09 | 2 |
| 208 | UBE3C              | UBE3C     | - | 132/185 | 2.892E-09 | 3 |
| 209 | p38beta (MAPK11)   | MAPK11    | + | 103/138 | 2.898E-09 | 2 |
| 210 | miR-146a-5p        | MIR146A   | - | 91/119  | 2.901E-09 | 2 |
| 211 | CNK1               | CNKSR1    | + | 141/200 | 3.154E-09 | 3 |
| 212 | DOCK3              | DOCK3     | + | 96/127  | 3.164E-09 | 3 |
| 213 | miR-146b-5p        | MIR146B   | - | 80/102  | 3.212E-09 | 2 |
| 214 | mature miR-4429    | MIR4429   | - | 119/164 | 3.339E-09 | 3 |
| 215 | SMURF1             | SMURF1    | - | 78/99   | 3.441E-09 | 2 |
| 216 | Dopamine D1A       | DRD1      | - | 87/113  | 3.559E-09 | 3 |
| 217 | TRIM26             | TRIM26    | - | 136/192 | 3.636E-09 | 3 |
| 218 | mTOR               | MTOR      | + | 85/110  | 3.916E-09 | 2 |
| 219 | ErbB4              | ERBB4     | + | 70/87   | 4.175E-09 | 2 |
| 220 | APPL2              | APPL2     | + | 97/129  | 4.249E-09 | 3 |
| 221 | SYNE2              | SYNE2     | - | 97/129  | 4.249E-09 | 3 |
| 222 | RagB               | RRAGB     | + | 90/118  | 4.457E-09 | 3 |
| 223 | RagD               | RRAGD     | + | 90/118  | 4.457E-09 | 3 |
| 224 | SH3RF              | SH3RF1    | + | 95/126  | 4.805E-09 | 3 |
| 225 | DDR1               | DDR1      | - | 118/163 | 4.868E-09 | 3 |
| 226 | Fc gamma RI        | FCGR1A    | + | 100/134 | 4.96E-09  | 3 |
| 227 | Fc gamma RI        | FCGR1A    | + | 100/134 | 4.96E-09  | 3 |
| 228 | CD79 complex       | CD79A     | + | 100/134 | 4.96E-09  | 3 |
| 229 | CD79 complex       | CD79B     | + | 100/134 | 4.96E-09  | 3 |
| 230 | IKK-alpha          | CHUK      | + | 141/201 | 5.345E-09 | 2 |
| 231 | C6orf176           | LINC00473 | + | 144/206 | 5.382E-09 | 3 |
| 232 | PDGF-B             | PDGFB     | + | 108/147 | 5.524E-09 | 3 |
| 234 | Migfilin           | FBLIM1    | + | 116/160 | 5.672E-09 | 3 |
| 233 | miR-412-5p         | MIR412    | - | 116/160 | 5.672E-09 | 3 |

|     |                      |          |   |         |           |   |
|-----|----------------------|----------|---|---------|-----------|---|
| 235 | ADAM17               | ADAM17   | + | 103/139 | 5.673E-09 | 3 |
| 236 | c-Fos                | FOS      | + | 176/260 | 5.92E-09  | 3 |
| 238 | miR-99a-3p           | MIR99A   | - | 84/109  | 6.08E-09  | 3 |
| 237 | hPEM-2 (collybistin) | ARHGEF9  | - | 84/109  | 6.08E-09  | 3 |
| 239 | eIF3S3               | EIF3H    | + | 145/208 | 6.384E-09 | 3 |
| 240 | NMI                  | NMI      | + | 71/89   | 6.484E-09 | 2 |
| 241 | ActRIIA              | ACVR2A   | + | 69/86   | 6.748E-09 | 3 |
| 242 | PTAFR                | PTAFR    | + | 89/117  | 6.831E-09 | 3 |
| 243 | PLC-beta2            | PLCB2    | + | 94/125  | 7.28E-09  | 3 |
| 244 | miR-4698             | MIR4698  | - | 134/190 | 7.352E-09 | 3 |
| 245 | Pacsin 2             | PACSIN2  | - | 99/133  | 7.439E-09 | 3 |
| 246 | BLNK                 | BLNK     | + | 50/58   | 7.851E-09 | 3 |
| 247 | G-protein            |          | + | 92/122  | 8.234E-09 | 3 |
| 248 | Ragulator            | LAMTOR2  | + | 85/111  | 8.493E-09 | 3 |
| 249 | Ragulator            | LAMTOR5  | + | 85/111  | 8.493E-09 | 3 |
| 250 | Ragulator            | LAMTOR4  | + | 85/111  | 8.493E-09 | 3 |
| 251 | Ragulator            | LAMTOR1  | + | 85/111  | 8.493E-09 | 3 |
| 252 | Ragulator            | LAMTOR3  | + | 85/111  | 8.493E-09 | 3 |
| 253 | Galectin-1           | LGALS1   | + | 97/130  | 8.494E-09 | 3 |
| 254 | MATK                 | MATK     | - | 141/202 | 8.954E-09 | 3 |
| 255 | Cyclin C             | CCNC     | + | 163/239 | 9.336E-09 | 3 |
| 256 | APG5                 | ATG5     | - | 119/166 | 1.085E-08 | 3 |
| 257 | RHEB2                | RHEB     | + | 93/124  | 1.1E-08   | 3 |
| 258 | NF-AT4(NFATC3)       | NFATC3   | + | 111/153 | 1.123E-08 | 3 |
| 259 | Calmyrin             | CIB1     | + | 122/171 | 1.134E-08 | 3 |
| 260 | BRMS1                | BRMS1    | - | 86/113  | 1.17E-08  | 2 |
| 261 | COMMD1 (MURR1)       | COMMD1   | - | 175/260 | 1.245E-08 | 3 |
| 262 | DEPTOR               | DEPTOR   | - | 84/110  | 1.307E-08 | 3 |
| 263 | RIG-G                | IFIT3    | + | 112/155 | 1.403E-08 | 3 |
| 264 | miR-1225-5p          | MIR1225  | - | 112/155 | 1.403E-08 | 3 |
| 265 | IRS-2                | IRS2     | - | 112/155 | 1.403E-08 | 3 |
| 266 | MECOM                | MECOM    | - | 94/126  | 1.455E-08 | 2 |
| 267 | STAT2                | STAT2    | + | 132/188 | 1.474E-08 | 3 |
| 268 | MEF2D                | MEF2D    | + | 180/269 | 1.521E-08 | 3 |
| 269 | TSLPR                | CRLF2    | + | 87/115  | 1.592E-08 | 3 |
| 270 | TSLPR                | IL7R     | + | 87/115  | 1.592E-08 | 3 |
| 271 | KLF5                 | KLF5     | + | 184/276 | 1.624E-08 | 3 |
| 272 | miR-539-3p           | MIR539   | - | 121/170 | 1.627E-08 | 3 |
| 273 | c-Fos                | FOS      | + | 97/131  | 1.661E-08 | 2 |
| 274 | miR-548x-3p          | MIR548X2 | - | 105/144 | 1.766E-08 | 3 |
| 275 | miR-548x-3p          | MIR548X  | - | 105/144 | 1.766E-08 | 3 |
| 276 | Syndecan-3           | SDC3     | + | 116/162 | 1.835E-08 | 3 |
| 278 | IL4RA                | IL4R     | + | 76/98   | 1.948E-08 | 3 |
| 277 | CD3 zeta             | CD247    | + | 76/98   | 1.948E-08 | 3 |
| 279 | VAV-3                | VAV3     | + | 128/182 | 2.06E-08  | 3 |
| 280 | GFRalpha1            | GFRA1    | + | 137/197 | 2.086E-08 | 3 |
| 281 | PHAP1 (pp32)         | ANP32A   | + | 134/192 | 2.09E-08  | 3 |
| 282 | PPP2R2B              | PPP2R2B  | - | 88/117  | 2.14E-08  | 3 |

|     |               |           |   |         |           |   |
|-----|---------------|-----------|---|---------|-----------|---|
| 283 | miR-548ah-5p  | MIR548AH  | - | 98/133  | 2.146E-08 | 3 |
| 284 | QIK           | SIK2      | - | 156/229 | 2.158E-08 | 3 |
| 285 | JAK1          | JAK1      | + | 81/106  | 2.24E-08  | 2 |
| 286 | LAGY          | HOPX      | + | 117/164 | 2.248E-08 | 3 |
| 287 | miR-330-5p    | MIR330    | - | 101/138 | 2.375E-08 | 2 |
| 288 | TGM4          | TGM4      | + | 126/179 | 2.434E-08 | 3 |
| 289 | RNF6          | RNF6      | + | 154/226 | 2.569E-08 | 3 |
| 290 | SHP-1         | PTPN6     | - | 148/216 | 2.723E-08 | 3 |
| 291 | MafK          | MAFK      | + | 185/279 | 2.739E-08 | 3 |
| 292 | TPL2(MAP3K8)  | MAP3K8    | + | 77/100  | 2.757E-08 | 2 |
| 293 | BAP1          | BAP1      | + | 130/186 | 2.931E-08 | 3 |
| 294 | TBK1          | TBK1      | + | 75/97   | 3.037E-08 | 2 |
| 295 | LINC00963     | LINC00963 | + | 82/108  | 3.071E-08 | 3 |
| 296 | CPEB3         | CPEB3     | - | 113/158 | 3.102E-08 | 3 |
| 297 | Connexin 43   | GJA1      | - | 159/235 | 3.26E-08  | 3 |
| 298 | PIAS4         | PIAS4     | - | 176/264 | 3.273E-08 | 3 |
| 299 | P52rIPK       | THAP12    | + | 80/105  | 3.44E-08  | 3 |
| 300 | PLD2          | PLD2      | + | 100/137 | 3.495E-08 | 3 |
| 301 | NR1           | GRIN1     | + | 147/215 | 3.751E-08 | 3 |
| 302 | HNF1-alpha    | HNF1A     | + | 114/160 | 3.794E-08 | 3 |
| 303 | NET1          | NET1      | + | 117/165 | 3.917E-08 | 3 |
| 304 | PIAS4         | PIAS4     | - | 141/205 | 3.94E-08  | 2 |
| 305 | Fc epsilon RI | FCER1A    | + | 98/134  | 4.055E-08 | 3 |
| 306 | Fc epsilon RI | MS4A2     | + | 98/134  | 4.055E-08 | 3 |
| 307 | Fc epsilon RI | FCER1G    | + | 98/134  | 4.055E-08 | 3 |
| 308 | PAK1          | PAK1      | + | 76/99   | 4.267E-08 | 2 |
| 309 | MOZ           | KAT6A     | + | 101/139 | 4.409E-08 | 2 |
| 310 | DOCK1         | DOCK1     | + | 91/123  | 4.869E-08 | 3 |
| 311 | MIR205HG      | MIR205HG  | - | 130/187 | 4.87E-08  | 3 |
| 312 | TLR6          | TLR6      | + | 37/41   | 5.129E-08 | 3 |
| 313 | miR-30b-5p    | MIR30B    | - | 99/136  | 5.13E-08  | 2 |
| 314 | IFNAR2        | IFNAR2    | + | 184/279 | 5.418E-08 | 3 |
| 315 | STRA6         | STRA6     | + | 94/128  | 5.436E-08 | 3 |
| 316 | miR-129-1-3p  | MIR129-1  | - | 137/199 | 5.569E-08 | 3 |
| 317 | LINC02575     | LINC02575 | + | 134/194 | 5.665E-08 | 3 |
| 318 | CMIP          | CMIP      | - | 119/169 | 5.693E-08 | 3 |
| 319 | DOCK2         | DOCK2     | + | 92/125  | 6.28E-08  | 3 |
| 320 | HSP70L1       | HSPA14    | + | 82/109  | 6.304E-08 | 3 |
| 321 | CENTA2        | ADAP2     | + | 100/138 | 6.442E-08 | 3 |
| 322 | miR-23a-3p    | MIR23A    | - | 129/186 | 6.809E-08 | 3 |
| 323 | IL-3 receptor | CSF2RB    | + | 106/148 | 7.231E-08 | 3 |
| 324 | IL-3 receptor | IL3RA     | + | 106/148 | 7.231E-08 | 3 |
| 325 | RagC          | RRAGC     | + | 85/114  | 7.338E-08 | 3 |
| 326 | ABL2          | ABL2      | + | 162/242 | 7.373E-08 | 3 |
| 327 | c-Src         | SRC       | + | 152/225 | 7.504E-08 | 3 |
| 328 | ZPR9          | ZNF622    | + | 133/193 | 7.87E-08  | 3 |
| 329 | Nucleophosmin | NPM1      | + | 133/193 | 7.87E-08  | 2 |
| 330 | LIFR          | LIFR      | + | 93/127  | 8.028E-08 | 3 |

|     |                     |          |   |         |           |   |
|-----|---------------------|----------|---|---------|-----------|---|
| 331 | NCAM1               | NCAM1    | + | 127/183 | 8.083E-08 | 3 |
| 332 | ATP7A               | ATP7A    | + | 71/92   | 8.084E-08 | 3 |
| 334 | STAT4               | STAT4    | + | 104/145 | 8.484E-08 | 3 |
| 333 | miR-518d-5p         | MIR518D  | - | 104/145 | 8.484E-08 | 3 |
| 335 | miR-224-3p          | MIR224   | - | 91/124  | 9.296E-08 | 3 |
| 336 | Caspase-12          | CASP12   | - | 113/160 | 9.385E-08 | 3 |
| 337 | CNR1                | CNR1     | + | 67/86   | 9.705E-08 | 3 |
| 338 | Karyopherin alpha 1 | KPNA1    | + | 79/105  | 1.083E-07 | 2 |
| 339 | NANOS2              | NANOS2   | - | 72/94   | 1.13E-07  | 3 |
| 340 | IFNAR2              | IFNAR2   | + | 33/36   | 1.136E-07 | 2 |
| 341 | FOXP3               | FOXP3    | - | 100/139 | 1.166E-07 | 3 |
| 342 | c-Jun               | JUN      | + | 103/144 | 1.224E-07 | 2 |
| 343 | DTX4                | DTX4     | - | 77/102  | 1.226E-07 | 3 |
| 344 | CBP                 | CREBBP   | + | 181/276 | 1.257E-07 | 2 |
| 345 | IL-9 receptor       | IL2RG    | + | 82/110  | 1.26E-07  | 3 |
| 346 | IL-9 receptor       | IL9R     | + | 82/110  | 1.26E-07  | 3 |
| 347 | IL-2R gamma chain   | IL2RG    | + | 82/110  | 1.26E-07  | 3 |
| 348 | Tyk2                | TYK2     | + | 146/216 | 1.27E-07  | 3 |
| 349 | USP13               | USP13    | + | 95/131  | 1.28E-07  | 2 |
| 350 | Fbxl19              | FBXL19   | - | 185/283 | 1.293E-07 | 3 |
| 351 | Contactin 2         | CNTN2    | + | 112/159 | 1.333E-07 | 3 |
| 352 | Karyopherin alpha 3 | KPNA3    | + | 150/223 | 1.382E-07 | 3 |
| 353 | DPF3                | DPF3     | + | 68/88   | 1.385E-07 | 2 |
| 354 | OSM receptor        | IL6ST    | + | 85/115  | 1.43E-07  | 3 |
| 355 | OSM receptor        | OSMR     | + | 85/115  | 1.43E-07  | 3 |
| 356 | CAS-L               | NEDD9    | + | 194/299 | 1.483E-07 | 3 |
| 357 | NUR77               | NR4A1    | - | 110/156 | 1.576E-07 | 2 |
| 358 | miR-101-3p          | MIR101-2 | - | 116/166 | 1.605E-07 | 2 |
| 359 | miR-101-3p          | MIR101-1 | - | 116/166 | 1.605E-07 | 2 |
| 360 | ATF-5               | ATF5     | + | 195/301 | 1.627E-07 | 3 |
| 361 | LYRIC               | MTDH     | + | 99/138  | 1.687E-07 | 2 |
| 362 | miR-520b-3p         | MIR520B  | - | 71/93   | 1.741E-07 | 2 |
| 363 | DTX1                | DTX1     | - | 192/296 | 1.763E-07 | 3 |
| 364 | WDR48               | WDR48    | + | 159/239 | 1.789E-07 | 3 |
| 365 | RAI                 | RNH1     | - | 129/188 | 1.796E-07 | 3 |
| 366 | alpha-6/beta-4      | ITGA6    | + | 105/148 | 1.82E-07  | 3 |
| 367 | alpha-6/beta-4      | ITGB4    | + | 105/148 | 1.82E-07  | 3 |
| 368 | p90Rsk              |          | + | 123/178 | 1.868E-07 | 3 |
| 369 | miR-33a-3p          | MIR33A   | - | 174/265 | 1.915E-07 | 3 |
| 370 | CIA/ASF1            | ASF1B    | + | 182/279 | 2.024E-07 | 3 |
| 371 | CC2D1A              | CC2D1A   | + | 171/260 | 2.054E-07 | 3 |
| 372 | NP220               | ZNF638   | + | 161/243 | 2.249E-07 | 3 |
| 373 | miR-548a-3p         | MIR548A1 | - | 95/132  | 2.319E-07 | 3 |
| 374 | miR-548a-3p         | MIR548A3 | - | 95/132  | 2.319E-07 | 3 |
| 375 | miR-548a-3p         | MIR548A2 | - | 95/132  | 2.319E-07 | 3 |
| 377 | FOXP3               | FOXP3    | - | 65/84   | 2.374E-07 | 2 |
| 376 | hsa-miR-4756-5p     | MIR4756  | - | 65/84   | 2.374E-07 | 3 |
| 379 | miR-128-1-5p        | MIR128-1 | - | 131/192 | 2.406E-07 | 3 |

|     |                     |          |   |         |           |   |
|-----|---------------------|----------|---|---------|-----------|---|
| 378 | Homer 3             | HOMER3   | - | 131/192 | 2.406E-07 | 3 |
| 380 | ASF1A               | ASF1A    | + | 180/276 | 2.409E-07 | 3 |
| 381 | Fc epsilon RI beta  | MS4A2    | + | 98/137  | 2.435E-07 | 3 |
| 382 | LARS1               | LARS1    | + | 101/142 | 2.528E-07 | 3 |
| 383 | IRF1                | IRF1     | + | 208/325 | 2.533E-07 | 3 |
| 384 | miR-365b-3p         | MIR365B  | - | 116/167 | 2.666E-07 | 3 |
| 385 | JSAP1               | MAPK8IP3 | + | 110/157 | 2.671E-07 | 3 |
| 386 | CAP1                | CAP1     | + | 135/199 | 2.671E-07 | 3 |
| 387 | NIK(MAP3K14)        | MAP3K14  | + | 70/92   | 2.674E-07 | 2 |
| 388 | ARHGAP21            | ARHGAP21 | - | 113/162 | 2.678E-07 | 3 |
| 389 | p300                | EP300    | + | 193/299 | 2.758E-07 | 2 |
| 390 | DEP-1               | PTPRJ    | + | 99/139  | 2.978E-07 | 3 |
| 392 | MUC1-CT             | MUC1     | + | 68/89   | 2.993E-07 | 2 |
| 394 | IFRD1               | IFRD1    | + | 68/89   | 2.993E-07 | 2 |
| 391 | CLIM1               | PDLIM1   | - | 68/89   | 2.993E-07 | 2 |
| 393 | FAF1                | FAF1     | - | 68/89   | 2.993E-07 | 2 |
| 395 | c-IAP2              | BIRC3    | + | 198/308 | 3.021E-07 | 3 |
| 396 | IL-7 receptor       | IL2RG    | + | 102/144 | 3.066E-07 | 3 |
| 397 | IL-7 receptor       | IL7R     | + | 102/144 | 3.066E-07 | 3 |
| 398 | HTR2A               | HTR2A    | + | 105/149 | 3.128E-07 | 3 |
| 399 | PTMA                | PTMA     | + | 179/275 | 3.161E-07 | 3 |
| 400 | HOXB-AS1            | HOXB-AS1 | + | 108/154 | 3.164E-07 | 3 |
| 401 | AUP1                | AUP1     | + | 73/97   | 3.202E-07 | 3 |
| 402 | TRIP6               | TRIP6    | + | 66/86   | 3.335E-07 | 2 |
| 403 | SMC1                | SMC1A    | + | 94/131  | 3.359E-07 | 3 |
| 404 | GFI-1               | GFI1     | - | 94/131  | 3.359E-07 | 2 |
| 405 | miR-3173-3p         | MIR3173  | - | 127/186 | 3.415E-07 | 3 |
| 406 | BAF170              | SMARCC2  | + | 151/227 | 3.618E-07 | 3 |
| 407 | PDLIM2              | PDLIM2   | - | 51/63   | 3.73E-07  | 2 |
| 408 | KIF26A              | KIF26A   | - | 112/161 | 3.759E-07 | 3 |
| 409 | Neurogenin 3        | NEUROG3  | + | 193/300 | 3.908E-07 | 3 |
| 410 | FKBP4               | FKBP4    | + | 84/115  | 4.014E-07 | 2 |
| 411 | FMIP                | THOC5    | + | 95/133  | 4.125E-07 | 3 |
| 412 | MEGF10              | MEGF10   | + | 74/99   | 4.253E-07 | 3 |
| 413 | D52                 | TPD52    | + | 156/236 | 4.262E-07 | 3 |
| 414 | TBP                 | TBP      | + | 116/168 | 4.37E-07  | 3 |
| 415 | FAK1                | PTK2     | + | 113/163 | 4.429E-07 | 2 |
| 416 | miR-378g            | MIR378G  | + | 104/148 | 4.437E-07 | 3 |
| 417 | TRIO                | TRIO     | + | 129/190 | 4.525E-07 | 3 |
| 418 | BDKRB2              | BDKRB2   | + | 67/88   | 4.602E-07 | 3 |
| 419 | cPKC (conventional) |          | + | 126/185 | 4.692E-07 | 3 |
| 420 | NIX                 | BNIP3L   | - | 93/130  | 4.851E-07 | 3 |
| 421 | EAP30               | SNF8     | + | 161/245 | 4.938E-07 | 3 |
| 422 | LOC101929517        | ETS1-AS1 | + | 114/165 | 5.197E-07 | 3 |
| 423 | Keratin 18          | KRT18    | - | 111/160 | 5.263E-07 | 3 |
| 424 | TRIM72              | TRIM72   | - | 105/150 | 5.294E-07 | 3 |
| 425 | C/EBPbeta           | CEBPB    | + | 177/273 | 5.411E-07 | 3 |
| 426 | p38alpha (MAPK14)   | MAPK14   | + | 144/216 | 5.46E-07  | 2 |

|     |                    |           |   |         |           |   |
|-----|--------------------|-----------|---|---------|-----------|---|
| 427 | Esrra              | ESRRA     | - | 75/101  | 5.577E-07 | 3 |
| 428 | KLF6               | KLF6      | + | 63/82   | 5.734E-07 | 2 |
| 429 | RhoB               | RHOB      | - | 83/114  | 5.902E-07 | 3 |
| 430 | cKrox              | ZBTB7B    | + | 94/132  | 5.931E-07 | 3 |
| 431 | HES6               | HES6      | + | 178/275 | 5.935E-07 | 3 |
| 432 | Septin 9           | SEPTIN9   | + | 163/249 | 6.07E-07  | 3 |
| 433 | JunD               | JUND      | + | 97/137  | 6.101E-07 | 3 |
| 434 | miR-551a           | MIR551A   | - | 112/162 | 6.18E-07  | 3 |
| 435 | PSMD10 (Gankyrin)  | PSMD10    | - | 100/142 | 6.215E-07 | 2 |
| 436 | DLEU1              | DLEU1     | + | 109/157 | 6.253E-07 | 3 |
| 437 | NAP2               | NAP1L4    | + | 156/237 | 6.313E-07 | 3 |
| 438 | IL-2 receptor      | IL2RB     | + | 86/119  | 6.334E-07 | 3 |
| 439 | IL-2 receptor      | IL2RA     | + | 86/119  | 6.334E-07 | 3 |
| 440 | IL-2 receptor      | IL2RG     | + | 86/119  | 6.334E-07 | 3 |
| 442 | PRDX1              | PRDX1     | + | 73/98   | 6.398E-07 | 2 |
| 441 | D52                | TPD52     | + | 73/98   | 6.398E-07 | 2 |
| 443 | DET1               | DET1      | - | 135/201 | 6.426E-07 | 3 |
| 444 | A2M                | A2M       | + | 81/111  | 6.869E-07 | 3 |
| 445 | ErbB4              | ERBB4     | + | 139/208 | 6.895E-07 | 3 |
| 446 | BAT3               | BAG6      | + | 196/307 | 7.051E-07 | 3 |
| 447 | MEF2A              | MEF2A     | + | 192/300 | 7.103E-07 | 3 |
| 448 | CASC9              | CASC9     | + | 188/293 | 7.132E-07 | 3 |
| 449 | MSK1               | RPS6KA5   | + | 95/134  | 7.204E-07 | 2 |
| 452 | miR-1298-5p        | MIR1298   | - | 113/164 | 7.228E-07 | 3 |
| 450 | PPP4C              | PPP4C     | - | 113/164 | 7.228E-07 | 3 |
| 451 | SIN1               | MAPKAP1   | - | 113/164 | 7.228E-07 | 3 |
| 454 | miR-448-3p         | MIR448    | - | 150/227 | 7.229E-07 | 3 |
| 453 | DDX19L             | DDX19A    | - | 76/103  | 7.229E-07 | 3 |
| 455 | SUR-8              | SHOC2     | - | 101/144 | 7.437E-07 | 3 |
| 456 | CDK5RAP3           | CDK5RAP3  | - | 147/222 | 7.716E-07 | 3 |
| 457 | ART-27             | UXT       | + | 151/229 | 8.062E-07 | 3 |
| 458 | LGP2               | DHX58     | - | 74/100  | 8.337E-07 | 3 |
| 459 | PI3K cat class III | PIK3C3    | + | 69/92   | 8.352E-07 | 3 |
| 460 | miR-1323           | MIR1323   | - | 127/188 | 8.43E-07  | 3 |
| 461 | LINC02605          | LINC02605 | + | 203/320 | 8.806E-07 | 3 |
| 462 | PRDX1              | PRDX1     | + | 163/250 | 8.827E-07 | 3 |
| 463 | MafK               | MAFK      | + | 62/81   | 8.865E-07 | 2 |
| 464 | c-Rel (NF-kB       | REL       | + | 39/46   | 9.158E-07 | 2 |
| 465 | TERT               | TERT      | + | 85/118  | 9.215E-07 | 2 |
| 466 | cKrox              | ZBTB7B    | + | 60/78   | 9.865E-07 | 2 |
| 467 | PSMD10 (Gankyrin)  | PSMD10    | - | 168/259 | 9.882E-07 | 3 |
| 468 | IEX1               | IER3      | - | 112/163 | 1.003E-06 | 3 |
| 469 | BRG1               | SMARCA4   | + | 146/221 | 1.029E-06 | 2 |
| 471 | Arrestin 3         | ARR3      | + | 103/148 | 1.048E-06 | 3 |
| 470 | MKP-2              | DUSP4     | - | 103/148 | 1.048E-06 | 3 |
| 472 | LOC145837          | DRAIC     | - | 161/247 | 1.051E-06 | 3 |
| 473 | miR-520c-3p        | MIR520C   | - | 75/102  | 1.074E-06 | 2 |
| 474 | CCR2               | CCR2      | + | 143/216 | 1.098E-06 | 3 |



|     |                     |          |   |         |            |   |
|-----|---------------------|----------|---|---------|------------|---|
| 475 | SIX1                | SIX1     | + | 162/249 | 1.158E-06  | 3 |
| 476 | IL-4R type I        | IL4R     | + | 113/165 | 1.164E-06  | 3 |
| 477 | IL-4R type I        | IL2RG    | + | 113/165 | 1.164E-06  | 3 |
| 478 | Dystrophin          | DMD      | + | 113/165 | 1.164E-06  | 3 |
| 479 | PRK1                | PKN1     | + | 140/211 | 0.00000117 | 3 |
| 480 | OGG1                | OGG1     | + | 186/291 | 1.187E-06  | 3 |
| 481 | alpha-V/beta-1      | ITGAV    | + | 110/160 | 1.194E-06  | 3 |
| 482 | alpha-V/beta-1      | ITGB1    | + | 110/160 | 1.194E-06  | 3 |
| 483 | CPEB4               | CPEB4    | + | 123/182 | 0.0000012  | 3 |
| 484 | IL-2R beta chain    | IL2RB    | + | 107/155 | 1.218E-06  | 3 |
| 485 | Ephrin-A receptor 4 | EPHA4    | + | 141/213 | 0.00000131 | 3 |
| 486 | M-CSF receptor      | CSF1R    | + | 152/232 | 1.318E-06  | 3 |
| 487 | PPP4R1              | PPP4R1   | - | 134/201 | 1.321E-06  | 3 |
| 488 | miR-138-2-3p        | MIR138-2 | - | 84/117  | 1.337E-06  | 3 |
| 489 | miR-4319            | MIR4319  | + | 76/104  | 1.368E-06  | 3 |
| 490 | EPC1                | EPC1     | + | 180/281 | 1.418E-06  | 3 |
| 491 | Fra-1               | FOSL1    | + | 66/88   | 0.00000144 | 3 |
| 492 | RelA (p65 NF-kB     | RELA     | + | 93/132  | 1.464E-06  | 2 |
| 493 | Dexas1              | RASD1    | - | 96/137  | 1.477E-06  | 3 |
| 494 | STAT2               | STAT2    | + | 23/24   | 0.00000149 | 1 |
| 495 | PAK2                | PAK2     | + | 189/297 | 1.509E-06  | 3 |
| 496 | SLM-2               | KHDRBS3  | + | 115/169 | 1.552E-06  | 3 |
| 497 | TH1L                | NELFCD   | - | 139/210 | 1.564E-06  | 3 |
| 498 | FasL(TNFSF6)        | FASLG    | - | 82/114  | 1.569E-06  | 3 |
| 499 | KIS                 | UHMK1    | + | 136/205 | 1.667E-06  | 3 |
| 500 | COMMD1 (MURR1)      | COMMD1   | - | 77/106  | 1.726E-06  | 2 |
| 501 | MAP3K2 (MEKK2)      | MAP3K2   | + | 151/231 | 1.739E-06  | 3 |
| 502 | TIRAP (Mal)         | TIRAP    | + | 94/134  | 1.752E-06  | 3 |
| 503 | MKK7 (MAP2K7)       | MAP2K7   | + | 159/245 | 1.807E-06  | 3 |
| 504 | miR-302d-5p         | MIR302D  | - | 72/98   | 1.844E-06  | 3 |
| 505 | I-kB                |          | - | 67/90   | 1.898E-06  | 2 |
| 506 | p38gamma            | MAPK12   | + | 188/296 | 1.933E-06  | 3 |
| 507 | Nova1               | NOVA1    | + | 86/121  | 2.002E-06  | 3 |
| 508 | IKBZ                | NFKBIZ   | - | 75/103  | 2.014E-06  | 2 |
| 509 | Agrin               | AGRN     | + | 117/173 | 0.00000204 | 3 |
| 510 | FBXL15              | FBXL15   | + | 89/126  | 0.00000205 | 3 |
| 511 | DDX1                | DDX1     | + | 95/136  | 2.085E-06  | 3 |
| 512 | MECOM               | MECOM    | - | 198/314 | 2.155E-06  | 3 |
| 513 | CaMK II gamma       | CAMK2G   | + | 142/216 | 2.165E-06  | 3 |
| 514 | PSMC3               | PSMC3    | + | 146/223 | 2.233E-06  | 3 |
| 515 | AZI2                | AZI2     | + | 73/100  | 2.346E-06  | 3 |
| 516 | RARbeta             | RARB     | - | 105/153 | 2.348E-06  | 3 |
| 517 | Paxillin            | PXN      | + | 166/258 | 2.387E-06  | 3 |
| 518 | ACKR3               | ACKR3    | + | 143/218 | 2.404E-06  | 3 |
| 519 | SH2B                | SH2B1    | + | 143/218 | 2.404E-06  | 3 |
| 520 | CUX1                | CUX1     | - | 68/92   | 2.468E-06  | 2 |
| 521 | IRAK1BP1            | IRAK1BP1 | + | 63/84   | 2.484E-06  | 2 |
| 522 | Pyrin (MEFV)        | MEFV     | + | 119/177 | 2.647E-06  | 3 |

|     |                    |         |   |         |            |   |
|-----|--------------------|---------|---|---------|------------|---|
| 523 | COASY              | COASY   | - | 148/227 | 2.727E-06  | 3 |
| 524 | NPAT               | NPAT    | + | 71/97   | 2.729E-06  | 3 |
| 525 | DPF2               | DPF2    | + | 197/313 | 2.736E-06  | 3 |
| 526 | SFRS3              | SRSF3   | + | 116/172 | 2.779E-06  | 3 |
| 527 | UBF                | UBTF    | + | 61/81   | 2.828E-06  | 3 |
| 530 | SOX11              | SOX11   | + | 61/81   | 2.828E-06  | 2 |
| 528 | TESC               | TESC    | + | 61/81   | 2.828E-06  | 2 |
| 531 | CRSP8 (CRSP34)     | MED27   | + | 61/81   | 2.828E-06  | 2 |
| 532 | ZFP91              | ZFP91   | + | 61/81   | 2.828E-06  | 2 |
| 529 | UACA               | UACA    | - | 61/81   | 2.828E-06  | 2 |
| 533 | AF-6               | AFDN    | - | 66/89   | 2.845E-06  | 3 |
| 534 | SNFT               | BATF3   | - | 100/145 | 2.862E-06  | 3 |
| 536 | USP44              | USP44   | - | 91/130  | 2.938E-06  | 3 |
| 535 | FMNL1              | FMNL1   | - | 91/130  | 2.938E-06  | 3 |
| 537 | NFKBIE             | NFKBIE  | - | 145/222 | 2.945E-06  | 3 |
| 538 | TIM-3              | HAVCR2  | + | 110/162 | 3.029E-06  | 3 |
| 539 | BAF60c             | SMARCD3 | + | 153/236 | 0.00000305 | 3 |
| 540 | DOT1               | DOT1L   | + | 173/271 | 3.056E-06  | 3 |
| 541 | USP1               | USP1    | + | 169/264 | 0.00000308 | 3 |
| 542 | MIR31HG            | MIR31HG | + | 77/107  | 3.139E-06  | 2 |
| 543 | LPAR2              | LPAR2   | + | 107/157 | 3.143E-06  | 3 |
| 544 | GATA-2             | GATA2   | - | 131/198 | 3.173E-06  | 3 |
| 545 | MKP-5              | DUSP10  | - | 142/217 | 3.176E-06  | 3 |
| 547 | RelA (p65 NF-kB    | RELA    | + | 59/78   | 3.208E-06  | 1 |
| 546 | WIP1               | PPM1D   | - | 59/78   | 3.208E-06  | 2 |
| 548 | LTBR(TNFRSF3)      | LTBR    | + | 52/67   | 0.00000323 | 3 |
| 549 | ERK1/2             |         | + | 195/310 | 3.233E-06  | 3 |
| 550 | ABIN-2             | TNIP2   | + | 150/231 | 3.307E-06  | 3 |
| 551 | CPSF4              | CPSF4   | + | 92/132  | 3.487E-06  | 3 |
| 552 | FasR(CD95)         | FAS     | - | 132/200 | 3.543E-06  | 3 |
| 553 | NLRC5              | NLRC5   | - | 125/188 | 3.604E-06  | 3 |
| 554 | miR-542-3p         | MIR542  | - | 136/207 | 3.677E-06  | 3 |
| 555 | TIP41              | TIPRL   | + | 75/104  | 3.683E-06  | 3 |
| 556 | PLC-gamma 1        | PLCG1   | + | 115/171 | 3.776E-06  | 3 |
| 557 | APP                | APP     | + | 129/195 | 3.789E-06  | 3 |
| 558 | SAM68              | KHDRBS1 | + | 102/149 | 3.872E-06  | 2 |
| 559 | p16INK4            | CDKN2A  | - | 99/144  | 3.976E-06  | 2 |
| 560 | CaMK II gamma      | CAMK2G  | + | 81/114  | 4.002E-06  | 2 |
| 561 | miR-297            | MIR297  | - | 156/242 | 4.006E-06  | 3 |
| 562 | G-protein alpha-12 | GNA12   | + | 84/119  | 4.091E-06  | 3 |
| 563 | ITGB3              | ITGB3   | + | 141/216 | 4.186E-06  | 3 |
| 564 | UACA               | UACA    | - | 130/197 | 0.00000423 | 3 |
| 566 | NFAT-90            | ILF3    | + | 65/88   | 4.251E-06  | 2 |
| 565 | NFKBIB             | NFKBIB  | - | 65/88   | 4.251E-06  | 2 |
| 569 | TBP                | TBP     | + | 60/80   | 0.00000429 | 2 |
| 571 | JunD               | JUND    | + | 60/80   | 0.00000429 | 2 |
| 567 | DDX9               | DHX9    | + | 60/80   | 0.00000429 | 2 |
| 568 | CPSF4              | CPSF4   | + | 60/80   | 0.00000429 | 2 |

|     |                  |           |   |         |            |   |
|-----|------------------|-----------|---|---------|------------|---|
| 570 | Clusterin        | CLU       | - | 60/80   | 0.00000429 | 2 |
| 572 | Makorin-2        | MKRN2     | - | 186/295 | 0.00000432 | 3 |
| 573 | NR2E3            | NR2E3     | + | 157/244 | 4.373E-06  | 3 |
| 574 | LINC02605        | LINC02605 | + | 42/52   | 4.532E-06  | 2 |
| 575 | TLR2             | TLR2      | + | 120/180 | 4.572E-06  | 3 |
| 576 | SMAD1            | SMAD1     | + | 174/274 | 4.593E-06  | 3 |
| 577 | Cyclin T1        | CCNT1     | + | 131/199 | 4.711E-06  | 3 |
| 578 | Nucleophosmin    | NPM1      | + | 166/260 | 4.714E-06  | 3 |
| 579 | MSK1             | RPS6KA5   | + | 183/290 | 4.755E-06  | 3 |
| 580 | ITGB8            | ITGB8     | + | 124/187 | 4.828E-06  | 3 |
| 582 | HES1             | HES1      | + | 117/175 | 4.844E-06  | 3 |
| 581 | DIS3L2           | DIS3L2    | + | 117/175 | 4.844E-06  | 3 |
| 583 | POT1             | POT1      | + | 85/121  | 4.907E-06  | 3 |
| 584 | TIE2             | TEK       | - | 88/126  | 4.924E-06  | 3 |
| 585 | miR-27a-5p       | MIR27A    | - | 147/227 | 0.00000515 | 3 |
| 586 | c-Jun            | JUN       | + | 151/234 | 5.188E-06  | 3 |
| 587 | BTG3             | BTG3      | - | 159/248 | 5.191E-06  | 3 |
| 588 | p38beta (MAPK11) | MAPK11    | + | 176/278 | 5.345E-06  | 3 |
| 589 | alpha-3/beta-1   | ITGB1     | + | 125/189 | 5.402E-06  | 3 |
| 590 | alpha-3/beta-1   | ITGA3     | + | 125/189 | 5.402E-06  | 3 |
| 591 | alpha-8/beta-1   | ITGA8     | + | 125/189 | 5.402E-06  | 3 |
| 592 | alpha-8/beta-1   | ITGB1     | + | 125/189 | 5.402E-06  | 3 |
| 593 | alpha-10/beta-1  | ITGB1     | + | 125/189 | 5.402E-06  | 3 |
| 594 | alpha-10/beta-1  | ITGA10    | + | 125/189 | 5.402E-06  | 3 |
| 595 | alpha-11/beta-1  | ITGA11    | + | 125/189 | 5.402E-06  | 3 |
| 596 | alpha-11/beta-1  | ITGB1     | + | 125/189 | 5.402E-06  | 3 |
| 597 | BTEB1            | KLF9      | - | 118/177 | 5.462E-06  | 3 |
| 599 | PHF20            | PHF20     | + | 61/82   | 5.648E-06  | 2 |
| 598 | miR-520e-3p      | MIR520E   | - | 61/82   | 5.648E-06  | 2 |
| 601 | ERK1/2           |           | + | 156/243 | 5.668E-06  | 2 |
| 600 | miR-646          | MIR646    | - | 156/243 | 5.668E-06  | 3 |
| 602 | Syndecan-1       | SDC1      | + | 92/133  | 5.758E-06  | 3 |
| 603 | G-protein beta-1 | GNB1      | + | 89/128  | 5.827E-06  | 3 |
| 604 | DCTN2            | DCTN2     | - | 86/123  | 0.00000585 | 2 |
| 605 | BRD4/NUT fusion  |           | + | 182/289 | 6.043E-06  | 3 |
| 606 | USP12            | USP12     | + | 165/259 | 6.062E-06  | 3 |
| 607 | microRNA 214     | MIR214    | - | 109/162 | 6.437E-06  | 3 |
| 608 | ART-27           | UXT       | + | 75/105  | 6.577E-06  | 2 |
| 609 | PHF20            | PHF20     | + | 127/193 | 6.714E-06  | 3 |
| 610 | LOC102724571     | LNCTAM34A | + | 154/240 | 6.739E-06  | 3 |
| 611 | SP1              | SP1       | + | 211/341 | 6.762E-06  | 3 |
| 612 | TFIIB            | GTF2B     | + | 139/214 | 7.223E-06  | 3 |
| 613 | PTPR-epsilon     | PTPRE     | - | 155/242 | 7.331E-06  | 3 |
| 614 | LINC00470        | LINC00470 | + | 128/195 | 7.459E-06  | 3 |
| 615 | IRF9             | IRF9      | + | 97/142  | 0.00000761 | 3 |
| 616 | TRIF (TICAM1)    | TICAM1    | + | 26/29   | 7.618E-06  | 2 |
| 617 | IL-23 receptor   | IL23R     | + | 132/202 | 7.666E-06  | 3 |
| 618 | IL-23 receptor   | IL12RB1   | + | 132/202 | 7.666E-06  | 3 |

|     |                   |          |   |         |            |   |
|-----|-------------------|----------|---|---------|------------|---|
| 619 | mTOR              | MTOR     | + | 181/288 | 7.666E-06  | 3 |
| 620 | JunB              | JUNB     | + | 177/281 | 7.875E-06  | 3 |
| 621 | IFN-alpha/beta    | IFNAR2   | + | 140/216 | 7.935E-06  | 3 |
| 622 | IFN-alpha/beta    | IFNAR1   | + | 140/216 | 7.935E-06  | 3 |
| 623 | PIAS1             | PIAS1    | - | 140/216 | 7.935E-06  | 2 |
| 624 | FBXO24            | FBXO24   | - | 91/132  | 8.029E-06  | 3 |
| 625 | Alpha-catenin     |          | + | 85/122  | 8.245E-06  | 3 |
| 626 | miR-302a-3p       | MIR302A  | - | 165/260 | 8.403E-06  | 3 |
| 627 | TPL2(MAP3K8)      | MAP3K8   | + | 178/283 | 8.451E-06  | 3 |
| 628 | Adenosine A2b     | ADORA2B  | - | 55/73   | 8.457E-06  | 2 |
| 629 | miR-221-5p        | MIR221   | + | 133/204 | 8.465E-06  | 3 |
| 630 | IKK-alpha         | CHUK     | + | 187/299 | 8.515E-06  | 3 |
| 631 | SHP-2             | PTPN11   | - | 137/211 | 8.608E-06  | 3 |
| 632 | CDK9              | CDK9     | + | 68/94   | 8.658E-06  | 2 |
| 633 | p38alpha (MAPK14) | MAPK14   | + | 174/276 | 8.675E-06  | 3 |
| 634 | miR-485-3p        | MIR485   | - | 145/225 | 8.747E-06  | 3 |
| 635 | CIZ1              | CIZ1     | + | 115/173 | 8.769E-06  | 3 |
| 636 | NKRF              | NKRF     | - | 126/192 | 8.904E-06  | 3 |
| 637 | ELKS              | ERC1     | + | 134/206 | 9.329E-06  | 3 |
| 638 | CRIP2             | CRIP2    | - | 92/134  | 9.353E-06  | 3 |
| 639 | SRF               | SRF      | + | 146/227 | 9.548E-06  | 3 |
| 640 | Dcc               | DCC      | + | 123/187 | 9.571E-06  | 3 |
| 641 | p15               | CDKN2B   | - | 102/151 | 9.644E-06  | 3 |
| 642 | p18               | CDKN2C   | - | 102/151 | 9.644E-06  | 3 |
| 643 | EAP30             | SNF8     | + | 28/32   | 9.651E-06  | 2 |
| 644 | PPAR-alpha        | PPARA    | - | 77/109  | 0.00000969 | 2 |
| 645 | NBAT1             | NBAT1    | + | 127/194 | 9.868E-06  | 3 |
| 646 | MCT-1             | MCTS1    | + | 127/194 | 9.868E-06  | 3 |
| 647 | miR-146b-5p       | MIR146B  | - | 120/182 | 0.00001027 | 3 |
| 648 | TIM-4             | TIMD4    | + | 106/158 | 0.00001043 | 3 |
| 650 | Elongin C         | ELOC     | - | 96/141  | 0.00001048 | 3 |
| 649 | SCCA-1            | SERPINB3 | - | 113/170 | 0.00001048 | 3 |
| 651 | miR-210-5p        | MIR210   | + | 93/136  | 0.00001084 | 3 |
| 652 | Par-4             | PAWR     | - | 61/83   | 0.0000109  | 2 |
| 653 | RBM8 (Y14)        | RBM8A    | + | 156/245 | 0.00001111 | 3 |
| 654 | miR-105-5p        | MIR105-1 | - | 156/245 | 0.00001111 | 3 |
| 655 | miR-105-5p        | MIR105-2 | - | 156/245 | 0.00001111 | 3 |
| 656 | TRAF7             | TRAF7    | - | 90/131  | 0.00001116 | 2 |
| 657 | SH3BP-2           | SH3BP2   | - | 90/131  | 0.00001116 | 3 |
| 658 | IRX3              | IRX3     | - | 72/101  | 0.00001118 | 3 |
| 659 | ANGPTL4           | ANGPTL4  | + | 136/210 | 0.00001127 | 3 |
| 660 | NFKBIA            | NFKBIA   | - | 148/231 | 0.00001132 | 3 |
| 661 | SGK1              | SGK1     | + | 140/217 | 0.00001134 | 3 |
| 662 | PTPR-alpha        | PTPRA    | + | 84/121  | 0.00001158 | 3 |
| 664 | SNHG6             | SNHG6    | + | 161/254 | 0.00001181 | 3 |
| 663 | PDCD10            | PDCD10   | - | 107/160 | 0.00001181 | 3 |
| 666 | PRMT6             | PRMT6    | + | 64/88   | 0.00001186 | 2 |
| 665 | MAD2L1BP          | MAD2L1BP | + | 64/88   | 0.00001186 | 3 |

|     |                     |          |   |         |            |   |
|-----|---------------------|----------|---|---------|------------|---|
| 667 | NFKBIE              | NFKBIE   | - | 64/88   | 0.00001186 | 2 |
| 668 | LRIG2               | LRIG2    | + | 129/198 | 0.00001204 | 3 |
| 669 | Betacellulin        | BTC      | + | 133/205 | 0.00001223 | 3 |
| 672 | Epiregulin          | EREG     | + | 133/205 | 0.00001223 | 3 |
| 670 | nAChR alpha-7       | CHRFAM7A | + | 133/205 | 0.00001223 | 3 |
| 671 | nAChR alpha-7       | CHRNA7   | + | 133/205 | 0.00001223 | 3 |
| 673 | Granzyme M          | GZMM     | - | 145/226 | 0.00001238 | 3 |
| 674 | TRIM40              | TRIM40   | - | 145/226 | 0.00001238 | 3 |
| 675 | ATF-5               | ATF5     | + | 38/47   | 0.00001245 | 2 |
| 676 | CRK                 | CRK      | + | 111/167 | 0.00001253 | 3 |
| 677 | IKK (cat)           | IKKBK    | + | 54/72   | 0.00001284 | 2 |
| 678 | IKK (cat)           | CHUK     | + | 54/72   | 0.00001284 | 2 |
| 680 | alpha-5/beta-1      | ITGB1    | + | 126/193 | 0.00001302 | 3 |
| 681 | alpha-5/beta-1      | ITGA5    | + | 126/193 | 0.00001302 | 3 |
| 679 | MIB1                | MIB1     | + | 126/193 | 0.00001302 | 3 |
| 682 | G-protein alpha-13  | GNA13    | + | 88/128  | 0.00001331 | 3 |
| 683 | LINC00277           | EWSAT1   | + | 108/162 | 0.00001332 | 3 |
| 684 | NF-kB1 (p105)       | NFKB1    | - | 146/228 | 0.00001346 | 3 |
| 685 | DPF3                | DPF3     | + | 142/221 | 0.00001352 | 3 |
| 686 | Calcyclin           | S100A6   | - | 85/123  | 0.0000136  | 3 |
| 687 | Alpha crystallin B  | CRYAB    | - | 85/123  | 0.0000136  | 2 |
| 688 | DEAF                | DEAF1    | + | 25/28   | 0.00001372 | 2 |
| 689 | Menin               | MEN1     | - | 76/108  | 0.0000138  | 2 |
| 690 | OASL                | OASL     | + | 62/85   | 0.00001386 | 3 |
| 691 | miR-194-5p          | MIR194-1 | - | 79/113  | 0.00001387 | 2 |
| 692 | miR-194-5p          | MIR194-2 | - | 79/113  | 0.00001387 | 2 |
| 694 | JNK1(MAPK8)         | MAPK8    | + | 112/169 | 0.00001404 | 2 |
| 693 | Gemin5              | GEMIN5   | + | 112/169 | 0.00001404 | 3 |
| 695 | NOTCH2 (2ICD)       | NOTCH2   | + | 105/157 | 0.00001412 | 3 |
| 696 | DUSP13              | DUSP13   | - | 127/195 | 0.00001437 | 3 |
| 697 | Karyopherin alpha 2 | KPNA2    | + | 92/135  | 0.00001495 | 2 |
| 698 | PAK                 |          | + | 109/164 | 0.00001497 | 3 |
| 699 | IRF9                | IRF9     | + | 16/16   | 0.00001526 | 1 |
| 700 | SNX8                | SNX8     | + | 106/159 | 0.00001592 | 3 |
| 702 | Neuregulin 2        | NRG2     | + | 132/204 | 0.000016   | 3 |
| 701 | PDIA3               | PDIA3    | + | 132/204 | 0.000016   | 3 |
| 703 | hnRNP F             | HNRNPF   | + | 144/225 | 0.00001601 | 3 |
| 704 | LIG-1               | LRIG1    | - | 136/211 | 0.00001608 | 3 |
| 705 | RelB (NF-kB)        | RELB     | + | 60/82   | 0.00001616 | 2 |
| 707 | CaMK IV             | CAMK4    | + | 74/105  | 0.00001638 | 2 |
| 706 | ANAPC4              | ANAPC4   | + | 74/105  | 0.00001638 | 3 |
| 708 | FGF9                | FGF9     | + | 80/115  | 0.00001642 | 3 |
| 710 | FGF2                | FGF2     | + | 80/115  | 0.00001642 | 3 |
| 711 | FGF8                | FGF8     | + | 80/115  | 0.00001642 | 3 |
| 709 | Klotho beta         | KLB      | + | 80/115  | 0.00001642 | 3 |
| 712 | ZAK                 | MAP3K20  | + | 96/142  | 0.00001647 | 3 |
| 713 | Ankyrin-G           | ANK3     | - | 96/142  | 0.00001647 | 3 |
| 714 | GSTP1               | GSTP1    | - | 157/248 | 0.0000166  | 3 |

|     |                 |           |   |         |            |   |
|-----|-----------------|-----------|---|---------|------------|---|
| 715 | miR-653-5p      | MIR653    | - | 27/31   | 0.00001698 | 2 |
| 716 | miR-130b-3p     | MIR130B   | - | 125/192 | 0.00001714 | 2 |
| 717 | IL-10 receptor  | IL10RB    | + | 129/199 | 0.00001738 | 3 |
| 718 | IL-10 receptor  | IL10RA    | + | 129/199 | 0.00001738 | 3 |
| 719 | FAM120A         | FAM120A   | + | 154/243 | 0.00001826 | 3 |
| 721 | ECT2            | ECT2      | + | 111/168 | 0.00001877 | 3 |
| 720 | PL scramblase 1 | PLSCR1    | - | 111/168 | 0.00001877 | 3 |
| 722 | miR-409-5p      | MIR409    | + | 78/112  | 0.00001955 | 3 |
| 723 | FGF17           | FGF17     | + | 75/107  | 0.00001959 | 3 |
| 724 | JNK2(MAPK9)     | MAPK9     | + | 182/293 | 0.00001994 | 3 |
| 725 | VEGFR-1         | FLT1      | + | 164/261 | 0.00002011 | 3 |
| 726 | TBK1            | TBK1      | + | 164/261 | 0.00002011 | 3 |
| 727 | BAT3            | BAG6      | + | 37/46   | 0.00002028 | 2 |
| 728 | Dystroglycan    | DAG1      | + | 123/189 | 0.00002045 | 3 |
| 730 | c-Kit           | KIT       | + | 131/203 | 0.00002087 | 3 |
| 729 | mGluR5          | GRM5      | + | 131/203 | 0.00002087 | 3 |
| 731 | OTUD1           | OTUD1     | - | 135/210 | 0.0000209  | 3 |
| 732 | MSK2            | RPS6KA4   | - | 35/43   | 0.00002097 | 2 |
| 733 | NFKBIB          | NFKBIB    | - | 98/146  | 0.00002133 | 3 |
| 734 | KLF11 (TIEG2)   | KLF11     | - | 64/89   | 0.00002161 | 2 |
| 735 | PDLIM2          | PDLIM2    | - | 116/177 | 0.00002161 | 3 |
| 736 | CtBP            |           | - | 148/233 | 0.00002205 | 3 |
| 737 | UBB             | UBB       | - | 170/272 | 0.00002231 | 2 |
| 738 | Myosin VI       | MYO6      | - | 76/109  | 0.00002328 | 3 |
| 739 | CtBP1           | CTBP1     | - | 153/242 | 0.00002332 | 3 |
| 740 | Golgin-95       | GOLGA2    | - | 92/136  | 0.00002355 | 3 |
| 741 | GRIPAP1         | GRIPAP1   | + | 99/148  | 0.00002415 | 3 |
| 742 | NFKBID          | NFKBID    | + | 121/186 | 0.0000244  | 3 |
| 743 | IRAK1BP1        | IRAK1BP1  | + | 125/193 | 0.00002471 | 3 |
| 744 | CDC20           | CDC20     | - | 62/86   | 0.00002542 | 2 |
| 745 | YTHDF1          | YTHDF1    | + | 177/285 | 0.00002602 | 3 |
| 746 | miR-520d-5p     | MIR520D   | - | 146/230 | 0.00002617 | 3 |
| 747 | HB-EGF          | HBEGF     | + | 142/223 | 0.00002658 | 3 |
| 748 | KDM2A           | KDM2A     | - | 80/116  | 0.000027   | 2 |
| 749 | CNTN1 (F3)      | CNTN1     | + | 68/96   | 0.0000273  | 3 |
| 750 | RGC32           | RGCC      | + | 68/96   | 0.0000273  | 2 |
| 751 | SFK             |           | + | 151/239 | 0.00002764 | 3 |
| 752 | SFK             |           | + | 151/239 | 0.00002764 | 3 |
| 753 | miR-548d-3p     | MIR548D2  | - | 90/133  | 0.00002816 | 3 |
| 754 | miR-548d-3p     | MIR548D1  | - | 90/133  | 0.00002816 | 3 |
| 755 | miR-let-7a-2-3p | MIRLET7A2 | - | 156/248 | 0.00002896 | 3 |
| 756 | Sirtuin6        | SIRT6     | - | 119/183 | 0.00002912 | 2 |
| 757 | PRMT6           | PRMT6     | + | 179/289 | 0.00002939 | 3 |
| 758 | AF-9            | MLLT3     | + | 135/211 | 0.00002946 | 3 |
| 759 | PDCD4           | PDCD4     | - | 60/83   | 0.00002987 | 2 |
| 760 | MYST1           | KAT8      | + | 108/164 | 0.0000299  | 2 |
| 761 | Cullin 2        | CUL2      | - | 84/123  | 0.0000305  | 2 |
| 762 | Nectin-1        | NECTIN1   | + | 81/118  | 0.00003146 | 3 |

|     |                    |           |   |         |            |   |
|-----|--------------------|-----------|---|---------|------------|---|
| 763 | miR-4728-5p        | MIR4728   | - | 105/159 | 0.00003207 | 3 |
| 764 | miR-1277-5p        | MIR1277   | + | 78/113  | 0.00003223 | 3 |
| 765 | HOXA-AS3           | HOXA-AS3  | + | 66/93   | 0.00003234 | 2 |
| 766 | LINC-PINT          | LINC-PINT | + | 66/93   | 0.00003234 | 2 |
| 767 | ANAPC1             | ANAPC1    | + | 128/199 | 0.00003235 | 3 |
| 768 | E-cadherin         | CDH1      | - | 75/108  | 0.00003275 | 2 |
| 769 | UBE3C              | UBE3C     | - | 28/33   | 0.00003309 | 2 |
| 770 | PIAS1              | PIAS1     | - | 186/302 | 0.00003346 | 3 |
| 771 | ASPP2              | TP53BP2   | + | 88/130  | 0.00003369 | 2 |
| 772 | FKBP8              | FKBP8     | - | 113/173 | 0.00003413 | 3 |
| 773 | p300               | EP300     | + | 34/42   | 0.00003439 | 1 |
| 774 | hsa-miR-3182       | MIR3182   | - | 95/142  | 0.00003457 | 3 |
| 775 | NF-kB2 (p100)      | NFKB2     | - | 146/231 | 0.00003609 | 3 |
| 776 | LRRK2              | LRRK2     | + | 173/279 | 0.0000361  | 3 |
| 777 | PKA-cat beta       | PRKACB    | + | 61/85   | 0.00003698 | 2 |
| 778 | SMARCA5            | SMARCA5   | + | 53/72   | 0.00003778 | 3 |
| 779 | MCM5               | MCM5      | + | 64/90   | 0.00003829 | 2 |
| 780 | F16P               | FBP1      | - | 174/281 | 0.00003835 | 3 |
| 781 | TrkB               | NTRK2     | - | 103/156 | 0.00003836 | 3 |
| 782 | CD36               | CD36      | + | 76/110  | 0.00003846 | 3 |
| 783 | miR-301a-3p        | MIR301A   | - | 89/132  | 0.00003846 | 2 |
| 784 | RIG-I              | DDX58     | + | 126/196 | 0.00003853 | 3 |
| 785 | ZNF451             | ZNF451    | - | 156/249 | 0.00003932 | 3 |
| 786 | RANBP7             | IPO7      | - | 143/226 | 0.00003973 | 3 |
| 787 | CBP                | CREBBP    | + | 215/355 | 0.00004057 | 3 |
| 788 | ADAM12             | ADAM12    | + | 111/170 | 0.00004076 | 3 |
| 789 | DOCK8              | DOCK8     | + | 100/151 | 0.00004106 | 3 |
| 790 | miR-1470           | MIR1470   | - | 135/212 | 0.00004118 | 3 |
| 791 | BRG1               | SMARCA4   | + | 185/301 | 0.00004154 | 3 |
| 792 | ITGAV              | ITGAV     | + | 131/205 | 0.00004167 | 3 |
| 793 | FGFR4              | FGFR4     | - | 83/122  | 0.00004204 | 3 |
| 794 | SAMM50             | SAMM50    | - | 104/158 | 0.00004274 | 3 |
| 795 | Sequestosome       | SQSTM1    | - | 104/158 | 0.00004274 | 2 |
| 796 | miR-520c-5p        | MIR520C   | - | 59/82   | 0.00004358 | 2 |
| 797 | TFIIA gamma chain  | GTF2A2    | + | 80/117  | 0.00004359 | 3 |
| 799 | PCBP-2             | PCBP2     | + | 90/134  | 0.00004373 | 2 |
| 798 | Leukocyte elastase | ELANE     | - | 140/221 | 0.00004373 | 3 |
| 800 | PU.1               | SPI1      | + | 23/26   | 0.00004399 | 1 |
| 801 | c-Rel (NF-kB       | REL       | + | 136/214 | 0.00004455 | 3 |
| 802 | XIST               | XIST      | - | 77/112  | 0.0000449  | 2 |
| 803 | miR-302a-3p        | MIR302A   | - | 77/112  | 0.0000449  | 2 |
| 804 | miR-875-3p         | MIR875    | - | 62/87   | 0.0000453  | 3 |
| 805 | BVRA               | BLVRA     | + | 128/200 | 0.00004565 | 3 |
| 806 | C1orf86            | FAAP20    | + | 74/107  | 0.00004591 | 3 |
| 807 | SOCS1              | SOCS1     | - | 74/107  | 0.00004591 | 2 |
| 808 | SP7                | SP7       | + | 145/230 | 0.000046   | 3 |
| 809 | TORC2              | CRTC2     | + | 182/296 | 0.00004612 | 3 |
| 810 | UTX                | KDM6A     | + | 197/323 | 0.00004626 | 3 |

|     |                |          |   |         |            |   |
|-----|----------------|----------|---|---------|------------|---|
| 811 | HSP70          |          | + | 65/92   | 0.00004632 | 2 |
| 812 | ATF-4          | ATF4     | + | 173/280 | 0.00004788 | 3 |
| 813 | miR-320d       | MIR320D1 | - | 109/167 | 0.0000487  | 3 |
| 814 | miR-320d       | MIR320D2 | - | 109/167 | 0.0000487  | 3 |
| 815 | TTI1           | TTI1     | + | 142/225 | 0.00005072 | 3 |
| 816 | SAMHD1         | SAMHD1   | - | 25/29   | 0.00005186 | 2 |
| 817 | CREB3          | CREB3    | - | 126/197 | 0.00005432 | 3 |
| 818 | miR-211-3p     | MIR211   | - | 99/150  | 0.00005489 | 3 |
| 820 | NF-AT1(NFATC2) | NFATC2   | + | 152/243 | 0.00005494 | 3 |
| 819 | MSK2           | RPS6KA4  | - | 152/243 | 0.00005494 | 3 |
| 821 | TFIIB          | GTF2B    | + | 66/94   | 0.00005556 | 2 |
| 822 | miR-493-5p     | MIR493   | - | 171/277 | 0.00005631 | 3 |
| 823 | TLR4           | TLR4     | + | 27/32   | 0.00005654 | 2 |
| 824 | p38gamma       | MAPK12   | + | 82/121  | 0.00005774 | 2 |
| 826 | alpha-V/beta-5 | ITGB5    | + | 131/206 | 0.00005815 | 3 |
| 827 | alpha-V/beta-5 | ITGAV    | + | 131/206 | 0.00005815 | 3 |
| 825 | UCHL3          | UCHL3    | + | 131/206 | 0.00005815 | 3 |
| 828 | GBP1           | GBP1     | - | 107/164 | 0.00005818 | 3 |
| 829 | DDEF1          | ASAP1    | + | 47/63   | 0.00005853 | 3 |
| 830 | miR-1248       | MIR1248  | - | 153/245 | 0.0000587  | 3 |
| 831 | Rad52          | RAD52    | + | 111/171 | 0.00005911 | 3 |
| 832 | miR-130a-3p    | MIR130A  | - | 154/247 | 0.00006264 | 2 |
| 833 | ERG            | ERG      | + | 183/299 | 0.00006366 | 3 |
| 834 | TRAF5          | TRAF5    | + | 73/106  | 0.00006411 | 3 |
| 835 | AKR1C3         | AKR1C3   | + | 141/224 | 0.00006458 | 3 |
| 836 | TELO2          | TELO2    | + | 141/224 | 0.00006458 | 3 |
| 837 | NF-kB1 (p50)   | NFKB1    | + | 164/265 | 0.00006535 | 3 |
| 838 | C11orf51       | ANAPC15  | + | 64/91   | 0.00006608 | 3 |
| 839 | miR-483-3p     | MIR483   | - | 137/217 | 0.00006628 | 3 |
| 840 | UBB            | UBB      | - | 194/319 | 0.00006648 | 3 |
| 841 | miR-26b-3p     | MIR26B   | - | 146/233 | 0.00006716 | 3 |
| 842 | ANAPC11        | ANAPC11  | - | 101/154 | 0.0000679  | 3 |
| 843 | Miz-1          | ZBTB17   | - | 170/276 | 0.00007011 | 3 |
| 844 | ABCA1          | ABCA1    | + | 125/196 | 0.00007012 | 3 |
| 845 | ASB2           | ASB2     | - | 109/168 | 0.00007057 | 3 |
| 846 | Ankyrin-B      | ANK2     | - | 53/73   | 0.00007082 | 3 |
| 847 | MCAM           | MCAM     | - | 53/73   | 0.00007082 | 3 |
| 848 | SOCS5          | SOCS5    | - | 134/212 | 0.00007305 | 3 |
| 849 | JMJD2D         | KDM4D    | + | 186/305 | 0.00007439 | 3 |
| 850 | DR6(TNFRSF21)  | TNFRSF21 | + | 74/108  | 0.00007455 | 3 |
| 851 | miR1a-1-5p     | MIR1-1   | - | 74/108  | 0.00007455 | 3 |
| 852 | NMI            | NMI      | + | 157/253 | 0.00007564 | 3 |
| 853 | NRB54          | NONO     | + | 126/198 | 0.00007593 | 3 |
| 854 | ISG15          | ISG15    | + | 139/221 | 0.0000765  | 3 |
| 855 | NF-AT5         | NFAT5    | + | 71/103  | 0.00007662 | 2 |
| 856 | CRIP2          | CRIP2    | - | 59/83   | 0.00007728 | 2 |
| 857 | TRFP           | MED20    | + | 95/144  | 0.0000786  | 3 |
| 858 | CDK6           | CDK6     | + | 81/120  | 0.00007902 | 2 |



|     |                     |         |   |         |            |   |
|-----|---------------------|---------|---|---------|------------|---|
| 859 | HBXAP               | RSF1    | + | 51/70   | 0.00008302 | 2 |
| 860 | PIKE(CENTG1)        | AGAP2   | + | 123/193 | 0.00008339 | 3 |
| 861 | GRK6                | GRK6    | + | 92/139  | 0.00008426 | 3 |
| 862 | FLJ20625            | LAMTOR1 | + | 111/172 | 0.00008482 | 3 |
| 863 | LRRFIP1             | LRRFIP1 | + | 34/43   | 0.00008508 | 2 |
| 864 | Neurogenin 3        | NEUROG3 | + | 34/43   | 0.00008508 | 2 |
| 865 | TRAF3               | TRAF3   | - | 96/146  | 0.00008752 | 3 |
| 866 | APEX                | APEX1   | + | 124/195 | 0.00009026 | 2 |
| 868 | CXCR4               | CXCR4   | + | 137/218 | 0.00009061 | 3 |
| 867 | PICT-1              | NOP53   | - | 137/218 | 0.00009061 | 3 |
| 869 | MSR1                | MSR1    | - | 104/160 | 0.00009155 | 3 |
| 870 | PTP4A3              | PTP4A3  | + | 86/129  | 0.00009597 | 3 |
| 871 | MIR31HG             | MIR31HG | + | 186/306 | 0.00009613 | 3 |
| 872 | mTORC2              | PRR5    | + | 147/236 | 0.0000967  | 3 |
| 873 | mTORC2              | MLST8   | + | 147/236 | 0.0000967  | 3 |
| 874 | mTORC2              | MTOR    | + | 147/236 | 0.0000967  | 3 |
| 875 | mTORC2              | MAPKAP1 | + | 147/236 | 0.0000967  | 3 |
| 876 | mTORC2              | RICTOR  | + | 147/236 | 0.0000967  | 3 |
| 877 | HMG14               | HMGN1   | + | 125/197 | 0.00009754 | 3 |
| 878 | NF-kB p50/p65       | RELA    | + | 28/34   | 0.00009756 | 2 |
| 879 | NF-kB p50/p65       | NFKB1   | + | 28/34   | 0.00009756 | 2 |
| 880 | ARNT                | ARNT    | + | 197/326 | 0.0000984  | 3 |
| 881 | gp130               | IL6ST   | + | 152/245 | 0.00009888 | 3 |
| 882 | TRIM35              | TRIM35  | - | 121/190 | 0.00009919 | 3 |
| 883 | VGLL4               | VGLL4   | - | 101/155 | 0.00009931 | 3 |
| 884 | UBAP2L              | UBAP2L  | + | 90/136  | 0.0001009  | 3 |
| 885 | miR-1299            | MIR1299 | - | 44/59   | 0.0001019  | 2 |
| 886 | Usp24               | USP24   | + | 167/272 | 0.0001023  | 3 |
| 887 | Lysyl oxidase       | LOX     | - | 73/107  | 0.0001032  | 3 |
| 888 | Malin               | NHLRC1  | + | 94/143  | 0.0001047  | 3 |
| 889 | MKP-1               | DUSP1   | - | 149/240 | 0.0001096  | 3 |
| 890 | PHLPPL              | PHLPP2  | - | 131/208 | 0.0001105  | 3 |
| 891 | miR-1304-5p         | MIR1304 | - | 64/92   | 0.0001113  | 3 |
| 892 | OR3A4               | OR3A4P  | + | 91/138  | 0.0001127  | 3 |
| 893 | NFKBIA              | NFKBIA  | - | 91/138  | 0.0001127  | 2 |
| 894 | DDA3                | PSRC1   | - | 84/126  | 0.000115   | 3 |
| 895 | I-kB                |         | - | 132/210 | 0.0001186  | 3 |
| 896 | Karyopherin alpha 4 | KPNA4   | + | 103/159 | 0.0001202  | 2 |
| 897 | SIGIRR              | SIGIRR  | - | 103/159 | 0.0001202  | 3 |
| 898 | CRSP8 (CRSP34)      | MED27   | + | 128/203 | 0.0001219  | 3 |
| 899 | miR-541-3p          | MIR541  | - | 137/219 | 0.000123   | 3 |
| 900 | MEF2A               | MEF2A   | + | 35/45   | 0.0001235  | 2 |
| 901 | RPS3                | RPS3    | + | 92/140  | 0.0001254  | 2 |
| 902 | miR-21-5p           | MIR21   | - | 156/253 | 0.0001254  | 2 |
| 903 | TRUSS               | TRPC4AP | + | 96/147  | 0.0001286  | 3 |
| 904 | miR-506-3p          | MIR506  | - | 116/182 | 0.0001296  | 2 |
| 905 | Polycystin          | PKD1    | + | 108/168 | 0.0001318  | 3 |
| 906 | CDK5R1 (p35)        | CDK5R1  | + | 157/255 | 0.0001327  | 3 |

|     |                     |          |   |         |           |   |
|-----|---------------------|----------|---|---------|-----------|---|
| 907 | RhoE                | RND3     | + | 59/84   | 0.0001332 | 2 |
| 908 | BRD9                | BRD9     | + | 162/264 | 0.0001335 | 3 |
| 909 | EPC1                | EPC1     | + | 40/53   | 0.0001343 | 2 |
| 910 | WDR62               | WDR62    | + | 89/135  | 0.0001349 | 3 |
| 911 | Karyopherin alpha 3 | KPNA3    | + | 21/24   | 0.0001386 | 2 |
| 912 | BRSK2               | BRSK2    | + | 93/142  | 0.0001391 | 3 |
| 913 | Tuberin             | TSC2     | - | 93/142  | 0.0001391 | 3 |
| 914 | miR-641             | MIR641   | - | 130/207 | 0.0001405 | 3 |
| 915 | CALCOCO2            | CALCOCO2 | - | 97/149  | 0.0001419 | 3 |
| 916 | hsa-miR-770-5p      | MIR770   | + | 109/170 | 0.0001436 | 3 |
| 917 | TIFA                | TIFA     | + | 105/163 | 0.0001441 | 3 |
| 918 | miR-766-5p          | MIR766   | - | 179/295 | 0.000146  | 3 |
| 919 | E2F1                | E2F1     | + | 159/259 | 0.0001484 | 3 |
| 920 | RACK1               | RACK1    | + | 90/137  | 0.0001501 | 2 |
| 921 | miR-582-5p          | MIR582   | - | 131/209 | 0.0001505 | 3 |
| 922 | ZAP70               | ZAP70    | + | 145/234 | 0.0001525 | 3 |
| 923 | CHFR                | CHFR     | - | 127/202 | 0.0001553 | 3 |
| 924 | c-FLIP              | CFLAR    | + | 98/151  | 0.0001562 | 3 |
| 925 | NOTCH2 (2ICD)       | NOTCH2   | + | 60/86   | 0.0001585 | 2 |
| 926 | EYA4                | EYA4     | + | 57/81   | 0.0001587 | 3 |
| 927 | BCR                 | BCR      | - | 141/227 | 0.0001591 | 3 |
| 928 | COP1                | COP1     | - | 87/132  | 0.0001616 | 2 |
| 929 | JAK1                | JAK1     | + | 146/236 | 0.0001619 | 3 |
| 930 | RIPK4               | RIPK4    | + | 73/108  | 0.0001629 | 3 |
| 931 | Adenosine A1        | ADORA1   | + | 137/220 | 0.0001656 | 3 |
| 932 | NET1(TSPAN1)        | TSPAN1   | + | 99/153  | 0.0001715 | 3 |
| 933 | Granzyme B          | GZMB     | - | 147/238 | 0.0001718 | 3 |
| 934 | CIDECD              | CIDECD   | - | 103/160 | 0.0001719 | 3 |
| 935 | miR-589-5p          | MIR589   | + | 133/213 | 0.000172  | 3 |
| 936 | CDK9                | CDK9     | + | 188/312 | 0.0001731 | 3 |
| 937 | IRF7                | IRF7     | + | 49/68   | 0.000179  | 3 |
| 938 | CHFR                | CHFR     | - | 64/93   | 0.0001829 | 2 |
| 939 | TARBP2              | TARBP2   | - | 92/141  | 0.0001841 | 3 |
| 940 | USP25               | USP25    | - | 100/155 | 0.0001878 | 3 |
| 942 | Fyn                 | FYN      | + | 121/192 | 0.0001895 | 3 |
| 941 | DUB3                | USP17L2  | + | 121/192 | 0.0001895 | 3 |
| 943 | Karyopherin alpha 4 | KPNA4    | + | 164/269 | 0.0001932 | 3 |
| 945 | miR-3928-3p         | MIR3928  | - | 78/117  | 0.0001981 | 3 |
| 944 | KPC1                | RNF123   | - | 78/117  | 0.0001981 | 3 |
| 946 | NF-kB p50/p65       | RELA     | + | 18/20   | 0.0002012 | 1 |
| 947 | NF-kB p50/p65       | NFKB1    | + | 18/20   | 0.0002012 | 1 |
| 950 | BAF60A              | SMARCD1  | + | 165/271 | 0.0002033 | 3 |
| 948 | miR-450a-5p         | MIR450A2 | - | 165/271 | 0.0002033 | 3 |
| 949 | miR-450a-5p         | MIR450A1 | - | 165/271 | 0.0002033 | 3 |
| 951 | FAM83B              | FAM83B   | + | 136/219 | 0.0002083 | 3 |
| 952 | STYK1               | STYK1    | + | 161/264 | 0.0002151 | 3 |
| 953 | SOX9                | SOX9     | + | 156/255 | 0.0002157 | 3 |
| 955 | RBCK1               | RBCK1    | - | 59/85   | 0.0002236 | 2 |

|      |                 |           |   |         |           |   |
|------|-----------------|-----------|---|---------|-----------|---|
| 954  | DVL-1           | DVL1      | - | 59/85   | 0.0002236 | 2 |
| 957  | Bid             | BID       | + | 142/230 | 0.0002247 | 3 |
| 956  | miR-330-5p      | MIR330    | - | 142/230 | 0.0002247 | 3 |
| 958  | ZFPM2-AS1       | ZFPM2-AS1 | + | 119/189 | 0.0002248 | 3 |
| 959  | RAD1            | RAD1      | + | 133/214 | 0.0002311 | 3 |
| 960  | Tip60           | KAT5      | + | 173/286 | 0.0002324 | 3 |
| 962  | TAF4B           | TAF4B     | + | 69/102  | 0.0002343 | 2 |
| 961  | NRBP            | NRBP1     | - | 69/102  | 0.0002343 | 3 |
| 963  | SHIP            | INPP5D    | - | 111/175 | 0.000236  | 3 |
| 964  | ECSIT           | ECSIT     | + | 87/133  | 0.0002386 | 3 |
| 965  | RAIDD           | CRADD     | + | 12/12   | 0.0002441 | 2 |
| 966  | NLRX1           | NLRX1     | - | 95/147  | 0.0002448 | 3 |
| 967  | NDR2            | STK38L    | - | 134/216 | 0.0002459 | 3 |
| 968  | miR-597-5p      | MIR597    | - | 80/121  | 0.0002493 | 3 |
| 969  | CBP/P300        | EP300     | + | 125/200 | 0.0002497 | 3 |
| 970  | CBP/P300        | CREBBP    | + | 125/200 | 0.0002497 | 3 |
| 971  | miR-514b-5p     | MIR514B   | + | 73/109  | 0.0002525 | 3 |
| 972  | STING (TMEM173) | STING1    | + | 28/35   | 0.0002541 | 2 |
| 973  | PKA-cat beta    | PRKACB    | + | 121/193 | 0.0002585 | 3 |
| 974  | NRIF3           | ITGB3BP   | - | 22/26   | 0.0002668 | 2 |
| 975  | MKL2            | MRTFB     | - | 57/82   | 0.0002674 | 2 |
| 976  | RASSF6          | RASSF6    | + | 96/149  | 0.0002678 | 3 |
| 977  | IRF6            | IRF6      | + | 81/123  | 0.000278  | 3 |
| 979  | ARF6            | ARF6      | + | 101/158 | 0.0002901 | 3 |
| 978  | HNF1A-AS1       | HNF1A-AS1 | - | 101/158 | 0.0002901 | 3 |
| 980  | miR-373-3p      | MIR373    | - | 89/137  | 0.0002905 | 2 |
| 981  | Lck             | LCK       | + | 114/181 | 0.0002948 | 3 |
| 982  | miR-3134        | MIR3134   | + | 123/197 | 0.0002955 | 3 |
| 983  | BRD7            | BRD7      | + | 152/249 | 0.0002967 | 3 |
| 984  | Kallikrein 6    | KLK6      | + | 82/125  | 0.000309  | 3 |
| 985  | UNRIP           | STRAP     | + | 82/125  | 0.000309  | 2 |
| 986  | miR-4717-5p     | MIR4717   | + | 38/51   | 0.0003105 | 3 |
| 988  | DACT3           | DACT3     | + | 58/84   | 0.000314  | 3 |
| 987  | URI             | URI1      | + | 58/84   | 0.000314  | 2 |
| 989  | miR-223-3p      | MIR223    | - | 164/271 | 0.0003213 | 3 |
| 990  | TOB2            | TOB2      | - | 139/226 | 0.0003298 | 3 |
| 991  | A20             | TNFAIP3   | - | 149/244 | 0.0003304 | 3 |
| 992  | UNRIP           | STRAP     | + | 170/282 | 0.0003308 | 3 |
| 993  | IL-22 receptor  | IL22RA1   | + | 144/235 | 0.0003309 | 3 |
| 994  | IL-22 receptor  | IL10RB    | + | 144/235 | 0.0003309 | 3 |
| 995  | LEF1-AS1        | LEF1-AS1  | + | 116/185 | 0.0003391 | 3 |
| 996  | FGFR3           | FGFR3     | + | 160/264 | 0.0003414 | 3 |
| 997  | GFI-1           | GFI1      | - | 160/264 | 0.0003414 | 3 |
| 998  | Emerin          | EMD       | - | 41/56   | 0.0003428 | 2 |
| 999  | miR-7-5p        | MIR7-1    | - | 99/155  | 0.0003458 | 2 |
| 1000 | miR-7-5p        | MIR7-2    | - | 99/155  | 0.0003458 | 2 |
| 1001 | miR-7-5p        | MIR7-3    | - | 99/155  | 0.0003458 | 2 |
| 1002 | miR-520e-3p     | MIR520E   | - | 131/212 | 0.0003634 | 3 |

|      |                     |         |   |         |           |   |
|------|---------------------|---------|---|---------|-----------|---|
| 1003 | MyD88               | MYD88   | + | 17/19   | 0.0003643 | 2 |
| 1004 | JAK2                | JAK2    | + | 146/239 | 0.0003679 | 3 |
| 1005 | miR-383-5p          | MIR383  | - | 141/230 | 0.0003682 | 3 |
| 1006 | BATF2               | BATF2   | + | 80/122  | 0.0003704 | 2 |
| 1007 | PPAR-gamma          | PPARG   | - | 80/122  | 0.0003704 | 2 |
| 1008 | MT-TRX              | TXN2    | - | 56/81   | 0.0003761 | 3 |
| 1009 | VISA                | MAVS    | + | 53/76   | 0.0003823 | 2 |
| 1010 | TAFII55             | TAF7    | - | 109/173 | 0.0003868 | 3 |
| 1011 | CDC42               | CDC42   | + | 105/166 | 0.000397  | 3 |
| 1012 | CFTR                | CFTR    | - | 123/198 | 0.0003972 | 3 |
| 1013 | miR-576-3p          | MIR576  | - | 39/53   | 0.0004012 | 2 |
| 1014 | SOCS2               | SOCS2   | + | 101/159 | 0.0004057 | 3 |
| 1015 | IL-6 receptor       | IL6R    | + | 148/243 | 0.0004076 | 3 |
| 1016 | IL-6 receptor       | IL6ST   | + | 148/243 | 0.0004076 | 3 |
| 1017 | p90RSK2(RPS6KA3     | RPS6KA3 | + | 133/216 | 0.000408  | 3 |
| 1018 | PTPN2               | PTPN2   | - | 143/234 | 0.0004096 | 3 |
| 1019 | miR-148a-3p         | MIR148A | - | 81/124  | 0.0004101 | 2 |
| 1020 | miR-212-5p          | MIR212  | + | 27/34   | 0.0004107 | 2 |
| 1021 | Alpha-actinin 4     | ACTN4   | + | 164/272 | 0.0004109 | 3 |
| 1022 | Symplekin           | SYMPK   | + | 85/131  | 0.000416  | 3 |
| 1023 | LXN                 | LXN     | - | 89/138  | 0.000418  | 3 |
| 1024 | BRD4                | BRD4    | + | 106/168 | 0.0004274 | 2 |
| 1025 | miR-29c-5p          | MIR29C  | - | 106/168 | 0.0004274 | 3 |
| 1027 | IRF3                | IRF3    | + | 19/22   | 0.0004277 | 1 |
| 1026 | Myotrophin          | MTPN    | - | 19/22   | 0.0004277 | 2 |
| 1028 | miR-653-5p          | MIR653  | - | 129/209 | 0.0004284 | 3 |
| 1029 | TRPM7               | TRPM7   | - | 57/83   | 0.0004388 | 3 |
| 1030 | DVL-2               | DVL2    | - | 57/83   | 0.0004388 | 2 |
| 1031 | BRD3                | BRD3    | + | 25/31   | 0.000439  | 2 |
| 1032 | miR-615-5p          | MIR615  | - | 111/177 | 0.0004452 | 3 |
| 1033 | IPMK                | IPMK    | + | 150/247 | 0.0004501 | 3 |
| 1034 | MKP-1               | DUSP1   | - | 23/28   | 0.0004561 | 2 |
| 1035 | miR-637             | MIR637  | - | 135/220 | 0.0004562 | 3 |
| 1036 | ATF-7               | ATF7    | + | 86/133  | 0.0004566 | 3 |
| 1037 | TRAM                | TICAM2  | + | 116/186 | 0.000459  | 3 |
| 1038 | Adenosine A2b       | ADORA2B | - | 121/195 | 0.0004694 | 3 |
| 1039 | Neogenin            | NEO1    | + | 32/42   | 0.0004703 | 3 |
| 1040 | STAT1               | STAT1   | + | 103/163 | 0.0004721 | 2 |
| 1041 | WRCH-1              | RHOA    | + | 112/179 | 0.0004764 | 3 |
| 1042 | Karyopherin alpha 1 | KPNA1   | + | 141/231 | 0.0004806 | 3 |
| 1043 | IRF7                | IRF7    | + | 11/11   | 0.0004883 | 1 |
| 1044 | KIR2DL4             | KIR2DL4 | - | 122/197 | 0.0004989 | 3 |
| 1045 | miR-378b            | MIR378B | + | 118/190 | 0.0005213 | 3 |
| 1046 | RASSF1              | RASSF1  | + | 164/273 | 0.0005227 | 3 |
| 1047 | NF-AT2(NFATC1)      | NFATC1  | + | 96/151  | 0.0005324 | 2 |
| 1048 | DAPK1               | DAPK1   | + | 30/39   | 0.0005325 | 2 |
| 1049 | RPL11               | RPL11   | - | 128/208 | 0.0005346 | 3 |
| 1051 | PTPD1               | PTPN21  | + | 80/123  | 0.0005422 | 3 |

|      |                 |           |   |         |           |   |
|------|-----------------|-----------|---|---------|-----------|---|
| 1050 | Rab-8           | RAB8A     | - | 80/123  | 0.0005422 | 3 |
| 1052 | Annexin VI      | ANXA6     | + | 114/183 | 0.0005433 | 3 |
| 1053 | UTX             | KDM6A     | + | 46/65   | 0.000545  | 2 |
| 1054 | C6orf106        | ILRUN     | + | 88/137  | 0.0005455 | 3 |
| 1055 | NXF1            | NXF1      | - | 62/92   | 0.0005555 | 3 |
| 1056 | MAP1            | MOAP1     | + | 101/160 | 0.0005615 | 3 |
| 1057 | miR-138-1-3p    | MIR138-1  | - | 110/176 | 0.0005647 | 3 |
| 1058 | EG624219        | ANGPTL8   | - | 129/210 | 0.0005654 | 3 |
| 1059 | JNK3(MAPK10)    | MAPK10    | + | 155/257 | 0.0005693 | 3 |
| 1060 | LAT             | LAT       | + | 97/153  | 0.0005752 | 3 |
| 1063 | HSF1            | HSF1      | + | 73/111  | 0.0005755 | 2 |
| 1062 | Nod2 (CARD15)   | NOD2      | + | 73/111  | 0.0005755 | 3 |
| 1061 | Alpha-actinin 4 | ACTN4     | + | 73/111  | 0.0005755 | 2 |
| 1064 | NIPBL           | NIPBL     | + | 106/169 | 0.0005849 | 3 |
| 1065 | MAP1LC3A        | MAP1LC3A  | + | 106/169 | 0.0005849 | 3 |
| 1066 | Trabid          | ZRANB1    | + | 125/203 | 0.0005949 | 3 |
| 1067 | miR-199a-5p     | MIR199A1  | - | 111/178 | 0.000603  | 2 |
| 1068 | miR-199a-5p     | MIR199A2  | - | 111/178 | 0.000603  | 2 |
| 1069 | NF-AT2(NFATC1)  | NFATC1    | + | 151/250 | 0.0006065 | 3 |
| 1070 | USP13           | USP13     | + | 141/232 | 0.0006233 | 3 |
| 1071 | DRIP130         | MED23     | + | 33/44   | 0.00063   | 2 |
| 1072 | Plakophilin 3   | PKP3      | - | 131/214 | 0.0006305 | 3 |
| 1073 | Ubiquilin-1     | UBQLN1    | - | 44/62   | 0.0006495 | 3 |
| 1074 | NALP4           | NLRP4     | - | 78/120  | 0.0006497 | 3 |
| 1075 | CD69            | CD69      | + | 118/191 | 0.0006951 | 3 |
| 1076 | RMRP            | RMRP      | + | 91/143  | 0.0006991 | 3 |
| 1077 | SOX10           | SOX10     | + | 123/200 | 0.0007008 | 3 |
| 1078 | HSP60           | HSPD1     | + | 36/49   | 0.0007013 | 2 |
| 1079 | T3JAM           | TRAF3IP3  | - | 87/136  | 0.0007093 | 3 |
| 1080 | NF-kB2 (p100)   | NFKB2     | - | 64/96   | 0.0007122 | 2 |
| 1081 | Smac/Diablo     | DIABLO    | - | 79/122  | 0.000714  | 3 |
| 1082 | GIT1            | GIT1      | + | 114/184 | 0.0007282 | 3 |
| 1085 | TACI(TNFRSF13B) | TNFRSF13B | + | 96/152  | 0.0007381 | 3 |
| 1083 | GIT2            | GIT2      | - | 96/152  | 0.0007381 | 3 |
| 1084 | NUMBL           | NUMBL     | - | 96/152  | 0.0007381 | 3 |
| 1086 | BMX             | BMX       | + | 145/240 | 0.0007544 | 3 |
| 1087 | NF-kB p65/p65   | RELA      | + | 22/27   | 0.0007569 | 2 |
| 1088 | HOXA10          | HOXA10    | + | 22/27   | 0.0007569 | 2 |
| 1089 | SHANK2          | SHANK2    | + | 61/91   | 0.0007583 | 3 |
| 1090 | PTPN12          | PTPN12    | - | 101/161 | 0.0007692 | 3 |
| 1091 | miR-194-5p      | MIR194-1  | - | 125/204 | 0.0007826 | 3 |
| 1092 | miR-194-5p      | MIR194-2  | - | 125/204 | 0.0007826 | 3 |
| 1093 | NF-kB1 (p50)    | NFKB1     | + | 106/170 | 0.0007928 | 2 |
| 1094 | HPK1(MAP4K1)    | MAP4K1    | + | 58/86   | 0.0008028 | 3 |
| 1095 | HSP20           | HSPB6     | + | 93/147  | 0.0008157 | 3 |
| 1096 | BAL             | PARP9     | + | 102/163 | 0.0008234 | 3 |
| 1097 | PEDF (serpinF1) | SERPINF1  | - | 121/197 | 0.0008254 | 3 |
| 1098 | Par-4           | PAWR      | - | 142/235 | 0.0008416 | 3 |

|      |                    |           |   |         |           |   |
|------|--------------------|-----------|---|---------|-----------|---|
| 1099 | IFN-gamma receptor | IFNGR1    | + | 112/181 | 0.0008603 | 3 |
| 1100 | IFN-gamma receptor | IFNGR2    | + | 112/181 | 0.0008603 | 3 |
| 1101 | FAM105B            | OTULIN    | + | 103/165 | 0.0008801 | 3 |
| 1102 | CNOT7              | CNOT7     | - | 103/165 | 0.0008801 | 3 |
| 1103 | miR-148a-3p        | MIR148A   | - | 143/237 | 0.0008811 | 3 |
| 1104 | miR-138-5p         | MIR138-2  | - | 138/228 | 0.000896  | 2 |
| 1105 | miR-138-5p         | MIR138-1  | - | 138/228 | 0.000896  | 2 |
| 1106 | miR-935            | MIR935    | - | 108/174 | 0.0009001 | 3 |
| 1107 | SIX4               | SIX4      | + | 46/66   | 0.0009291 | 3 |
| 1108 | ZIN                | RNF216    | - | 78/121  | 0.0009365 | 3 |
| 1109 | TRAF6              | TRAF6     | + | 95/151  | 0.0009439 | 2 |
| 1110 | Piccolo            | PCLO      | + | 109/176 | 0.000957  | 3 |
| 1111 | miR-516a-5p        | MIR516A2  | - | 109/176 | 0.000957  | 3 |
| 1112 | miR-516a-5p        | MIR516A1  | - | 109/176 | 0.000957  | 3 |
| 1114 | Alpha-actinin 1    | ACTN1     | + | 63/95   | 0.0009622 | 3 |
| 1113 | NF-kB1 (p105)      | NFKB1     | - | 63/95   | 0.0009622 | 2 |
| 1115 | STO                | NSD1      | + | 56/83   | 0.0009657 | 2 |
| 1116 | ASXL1              | ASXL1     | + | 100/160 | 0.0009769 | 3 |
| 1117 | TFIID              | TAF10     | + | 67/102  | 0.0009964 | 3 |
| 1118 | TFIID              | TAF7L     | + | 67/102  | 0.0009964 | 3 |
| 1119 | TFIID              | TAF15     | + | 67/102  | 0.0009964 | 3 |
| 1120 | TFIID              | TAF7      | + | 67/102  | 0.0009964 | 3 |
| 1121 | TFIID              | TAF8      | + | 67/102  | 0.0009964 | 3 |
| 1122 | TFIID              | TAF4B     | + | 67/102  | 0.0009964 | 3 |
| 1123 | TFIID              | TAF1      | + | 67/102  | 0.0009964 | 3 |
| 1124 | TFIID              | TAF13     | + | 67/102  | 0.0009964 | 3 |
| 1125 | TFIID              | TAF9B     | + | 67/102  | 0.0009964 | 3 |
| 1126 | TFIID              | TAF12     | + | 67/102  | 0.0009964 | 3 |
| 1127 | TFIID              | TAF2      | + | 67/102  | 0.0009964 | 3 |
| 1128 | TFIID              | TAF9      | + | 67/102  | 0.0009964 | 3 |
| 1129 | TFIID              | TBP       | + | 67/102  | 0.0009964 | 3 |
| 1130 | TFIID              | TAF4      | + | 67/102  | 0.0009964 | 3 |
| 1131 | TFIID              | TAF6      | + | 67/102  | 0.0009964 | 3 |
| 1132 | TFIID              | TAF3      | + | 67/102  | 0.0009964 | 3 |
| 1133 | TFIID              | TAF5      | + | 67/102  | 0.0009964 | 3 |
| 1134 | TFIID              | TAF11     | + | 67/102  | 0.0009964 | 3 |
| 1135 | IRF2               | IRF2      | - | 67/102  | 0.0009964 | 2 |
| 1136 | RANBP10            | RANBP10   | + | 130/214 | 0.001013  | 3 |
| 1137 | PSTPIP2            | PSTPIP2   | + | 125/205 | 0.001022  | 3 |
| 1139 | SAD1 (USP39)       | USP39     | + | 147/245 | 0.001051  | 3 |
| 1138 | miR-155-5p         | MIR155    | - | 147/245 | 0.001051  | 2 |
| 1140 | CDK3               | CDK3      | + | 142/236 | 0.001075  | 3 |
| 1141 | SCP1               | CTDSP1    | - | 116/189 | 0.001083  | 3 |
| 1142 | miR-1301-3p        | MIR1301   | - | 38/53   | 0.001095  | 2 |
| 1143 | miR-518b           | MIR518B   | - | 84/132  | 0.001097  | 3 |
| 1144 | XAF1               | XAF1      | + | 132/218 | 0.001116  | 3 |
| 1145 | DR4(TNFRSF10A)     | TNFRSF10A | + | 72/111  | 0.001119  | 3 |
| 1146 | IKK-beta           | IKKBK     | + | 72/111  | 0.001119  | 2 |

|      |               |            |   |         |          |   |
|------|---------------|------------|---|---------|----------|---|
| 1147 | Connexin 40   | GJA5       | + | 93/148  | 0.001122 | 3 |
| 1149 | Alpha-1B      | ADRA1B     | + | 61/92   | 0.001157 | 3 |
| 1150 | Alpha-1D      | ADRA1D     | + | 61/92   | 0.001157 | 3 |
| 1148 | Keratin 8     | KRT8       | + | 61/92   | 0.001157 | 3 |
| 1151 | PDK1          | PDK1       | + | 144/240 | 0.001173 | 3 |
| 1152 | PHF8          | PHF8       | + | 123/202 | 0.001199 | 3 |
| 1153 | miR-223-3p    | MIR223     | - | 108/175 | 0.0012   | 2 |
| 1154 | MyD88         | MYD88      | + | 129/213 | 0.001245 | 3 |
| 1155 | SENP3         | SENP3      | + | 140/233 | 0.001254 | 3 |
| 1156 | PML           | PML        | - | 114/186 | 0.001275 | 2 |
| 1157 | MKP-5         | DUSP10     | - | 19/23   | 0.0013   | 2 |
| 1158 | VDAC 1        | VDAC1      | - | 100/161 | 0.001317 | 3 |
| 1159 | ELF3          | ELF3       | + | 66/101  | 0.001327 | 2 |
| 1160 | Galectin-9    | LGALS9     | + | 91/145  | 0.001334 | 3 |
| 1161 | miR-370-5p    | MIR370     | - | 70/108  | 0.001342 | 3 |
| 1162 | CFTR          | CFTR       | - | 59/89   | 0.001393 | 2 |
| 1163 | miR-219-1-3p  | MIR219A1   | + | 106/172 | 0.001417 | 3 |
| 1164 | AGTR1         | AGTR1      | + | 116/190 | 0.001419 | 3 |
| 1165 | PITPNA-AS1    | PITPNA-AS1 | + | 111/181 | 0.001422 | 3 |
| 1166 | PKC-epsilon   | PRKCE      | + | 63/96   | 0.001439 | 2 |
| 1167 | CD45          | PTPRC      | - | 79/124  | 0.001444 | 3 |
| 1168 | miR-576-3p    | MIR576     | - | 127/210 | 0.001457 | 3 |
| 1169 | LGR4          | LGR4       | - | 97/156  | 0.001465 | 3 |
| 1170 | TGM2          | TGM2       | + | 60/91   | 0.001556 | 2 |
| 1171 | NEUR1         | NEU1       | - | 113/185 | 0.001583 | 3 |
| 1172 | IGBP1         | IGBP1      | - | 108/176 | 0.001586 | 3 |
| 1173 | ULK2          | ULK2       | + | 53/79   | 0.001592 | 3 |
| 1174 | SFRS2 (SC-35) | SRSF2      | + | 135/225 | 0.001632 | 3 |
| 1175 | APPBP2        | APPBP2     | + | 119/196 | 0.001651 | 3 |
| 1176 | Bcl-6         | BCL6       | - | 12/13   | 0.001709 | 1 |
| 1177 | BMI-1         | BMI1       | - | 12/13   | 0.001709 | 1 |
| 1178 | BMI-1         | COMMD3-    | - | 12/13   | 0.001709 | 1 |
| 1179 | RORET         | TRIM38     | - | 95/153  | 0.001736 | 3 |
| 1180 | miR-3140-3p   | MIR3140    | - | 131/218 | 0.001746 | 3 |
| 1181 | DARPP-32      | PPP1R1B    | + | 121/200 | 0.001817 | 3 |
| 1182 | 4EHP          | EIF4E2     | + | 132/220 | 0.001823 | 3 |
| 1184 | MAPKBP1       | MAPKBP1    | + | 96/155  | 0.001847 | 3 |
| 1183 | CaMK II alpha | CAMK2A     | - | 96/155  | 0.001847 | 3 |
| 1185 | CBLC          | CBLC       | - | 111/182 | 0.001861 | 3 |
| 1186 | HSP40         | DNAJB1     | - | 111/182 | 0.001861 | 3 |
| 1187 | CHP1          | CHORDC1    | + | 78/123  | 0.001866 | 3 |
| 1188 | CHMP4B        | CHMP4B     | + | 58/88   | 0.001873 | 3 |
| 1189 | BRD7          | BRD7       | + | 51/76   | 0.001918 | 2 |
| 1190 | IRF4          | IRF4       | + | 38/54   | 0.001919 | 2 |
| 1191 | PKM2          | PKM        | + | 108/177 | 0.002078 | 2 |
| 1193 | AP complex 2  | AP2B1      | + | 59/90   | 0.002083 | 3 |
| 1194 | AP complex 2  | AP2A1      | + | 59/90   | 0.002083 | 3 |
| 1195 | AP complex 2  | AP2A2      | + | 59/90   | 0.002083 | 3 |

|      |                   |          |   |         |          |   |
|------|-------------------|----------|---|---------|----------|---|
| 1196 | AP complex 2      | AP2M1    | + | 59/90   | 0.002083 | 3 |
| 1197 | AP complex 2      | AP2S1    | + | 59/90   | 0.002083 | 3 |
| 1192 | A20               | TNFAIP3  | - | 59/90   | 0.002083 | 2 |
| 1198 | NFAT-90           | ILF3     | + | 124/206 | 0.002085 | 3 |
| 1199 | miR-202-5p        | MIR202   | - | 33/46   | 0.002267 | 2 |
| 1200 | AAMP              | AAMP     | + | 110/181 | 0.0023   | 3 |
| 1201 | SSTR5             | SSTR5    | - | 110/181 | 0.0023   | 3 |
| 1202 | UNC5B             | UNC5B    | + | 36/51   | 0.002301 | 3 |
| 1203 | TLE2              | TLE2     | + | 95/154  | 0.002319 | 3 |
| 1204 | NRF2              | NFE2L2   | - | 105/172 | 0.002321 | 3 |
| 1205 | miR-194-3p        | MIR194-2 | + | 81/129  | 0.002325 | 3 |
| 1206 | PRMT1             | PRMT1    | + | 81/129  | 0.002325 | 2 |
| 1207 | microRNA 21       | MIR21    | - | 117/194 | 0.00249  | 3 |
| 1208 | Annexin V         | ANXA5    | - | 69/108  | 0.002512 | 3 |
| 1209 | Profilin          |          | + | 61/94   | 0.002539 | 3 |
| 1210 | miR-766-5p        | MIR766   | - | 28/38   | 0.002549 | 2 |
| 1211 | MBNL1             | MBNL1    | + | 102/167 | 0.002592 | 3 |
| 1212 | miR-205-3p        | MIR205   | - | 118/196 | 0.002604 | 3 |
| 1213 | TLR3              | TLR3     | + | 103/169 | 0.002731 | 3 |
| 1214 | AdipoR1           | ADIPOR1  | + | 34/48   | 0.002758 | 3 |
| 1217 | RIOK3             | RIOK3    | - | 62/96   | 0.002786 | 3 |
| 1215 | HSPA1B            | HSPA1A   | - | 62/96   | 0.002786 | 2 |
| 1216 | HSPA1B            | HSPA1B   | - | 62/96   | 0.002786 | 2 |
| 1218 | TrkA              | NTRK1    | - | 109/180 | 0.002834 | 3 |
| 1219 | miR-1276          | MIR1276  | - | 120/200 | 0.002843 | 3 |
| 1220 | miR-4288          | MIR4288  | - | 104/171 | 0.002873 | 3 |
| 1221 | NF-kB p52/RelB    | NFKB2    | + | 21/27   | 0.002962 | 2 |
| 1222 | NF-kB p52/RelB    | RELB     | + | 21/27   | 0.002962 | 2 |
| 1223 | NF-kB p65/c-Rel   | RELA     | + | 21/27   | 0.002962 | 2 |
| 1224 | NF-kB p65/c-Rel   | REL      | + | 21/27   | 0.002962 | 2 |
| 1225 | EGFR              | EGFR     | + | 110/182 | 0.002971 | 2 |
| 1226 | JMJD6             | JMJD6    | - | 55/84   | 0.003019 | 2 |
| 1228 | TAK1(MAP3K7)      | MAP3K7   | + | 116/193 | 0.003043 | 3 |
| 1227 | IMP1(ZBP1)        | IGF2BP1  | + | 116/193 | 0.003043 | 2 |
| 1229 | RSAD2             | RSAD2    | + | 63/98   | 0.003046 | 3 |
| 1231 | NGAL              | LCN2     | + | 111/184 | 0.003112 | 3 |
| 1230 | PRMT8             | PRMT8    | - | 111/184 | 0.003112 | 3 |
| 1232 | BLIMP1 (PRDI-BF1) | PRDM1    | - | 11/12   | 0.003174 | 1 |
| 1233 | miR-25-5p         | MIR25    | - | 117/195 | 0.003178 | 3 |
| 1234 | FTO               | FTO      | - | 35/50   | 0.0033   | 2 |
| 1236 | NF-kB             |          | + | 19/24   | 0.003305 | 1 |
| 1237 | TLR9              | TLR9     | + | 19/24   | 0.003305 | 3 |
| 1235 | RI58              | IFIT5    | - | 19/24   | 0.003305 | 2 |
| 1238 | RRAD              | RRAD     | - | 60/93   | 0.003348 | 2 |
| 1239 | HSP70             |          | + | 102/168 | 0.003376 | 3 |
| 1240 | Mucin 13          | MUC13    | + | 113/188 | 0.003404 | 3 |
| 1241 | Aif               | AIFM1    | + | 87/141  | 0.003415 | 3 |
| 1242 | TRIM35            | TRIM35   | - | 17/21   | 0.003599 | 2 |



|      |                    |           |   |         |          |   |
|------|--------------------|-----------|---|---------|----------|---|
| 1243 | Tensin 4           | TNS4      | + | 109/181 | 0.003642 | 3 |
| 1244 | IKK-epsilon        | IKBKE     | - | 57/88   | 0.003672 | 2 |
| 1245 | TMEM16A            | ANO1      | + | 110/183 | 0.003808 | 3 |
| 1246 | IBP2               | IGFBP2    | + | 110/183 | 0.003808 | 3 |
| 1247 | TXNIP (VDUP1)      | TXNIP     | - | 84/136  | 0.003812 | 2 |
| 1249 | VAV-2              | VAV2      | + | 94/154  | 0.003814 | 3 |
| 1248 | miR-345-3p         | MIR345    | - | 94/154  | 0.003814 | 3 |
| 1250 | NF-AT4(NFATC3)     | NFATC3    | + | 36/52   | 0.003894 | 2 |
| 1251 | HGF receptor (Met) | MET       | + | 36/52   | 0.003894 | 2 |
| 1252 | TLR8               | TLR8      | - | 66/104  | 0.0039   | 3 |
| 1253 | SAHH2              | AHCYL1    | - | 58/90   | 0.004023 | 3 |
| 1254 | RUVBL2             | RUVBL2    | - | 85/138  | 0.004042 | 2 |
| 1255 | Cullin 1           | CUL1      | - | 22/29   | 0.004065 | 2 |
| 1256 | BRD3               | BRD3      | + | 43/64   | 0.004073 | 3 |
| 1257 | miR-26a-1-3p       | MIR26A1   | + | 101/167 | 0.004159 | 3 |
| 1258 | SBF2-AS1           | SBF2-AS1  | + | 81/131  | 0.004256 | 3 |
| 1259 | Htra2              | HTRA2     | - | 81/131  | 0.004256 | 3 |
| 1260 | Prickle-1          | PRICKLE1  | + | 63/99   | 0.004317 | 3 |
| 1261 | PKC-delta          | PRKCD     | + | 102/169 | 0.004358 | 2 |
| 1262 | MafB               | MAFB      | - | 25/34   | 0.004521 | 2 |
| 1263 | HIF-prolyl         |           | - | 37/54   | 0.004537 | 2 |
| 1264 | TFE3               | TFE3      | + | 44/66   | 0.004605 | 3 |
| 1265 | NF-kB p50/c-Rel    | NFKB1     | + | 20/26   | 0.004678 | 2 |
| 1266 | NF-kB p50/c-Rel    | REL       | + | 20/26   | 0.004678 | 2 |
| 1267 | PI3K reg class IA  |           | + | 93/153  | 0.004727 | 3 |
| 1268 | Fetuin-A           | AHSG      | + | 28/39   | 0.004738 | 3 |
| 1269 | SH3PXD2A-AS1       | SH3PXD2A- | + | 83/135  | 0.004782 | 3 |
| 1270 | MafB               | MAFB      | - | 56/87   | 0.004837 | 3 |
| 1271 | MAP1LC3B           | MAP1LC3B  | - | 99/164  | 0.004878 | 3 |
| 1272 | DEAF               | DEAF1     | + | 41/61   | 0.004927 | 3 |
| 1273 | PYGO2              | PYGO2     | - | 105/175 | 0.004982 | 3 |
| 1274 | CD79A              | CD79A     | + | 100/166 | 0.005106 | 3 |
| 1275 | Nibrin             | NBN       | + | 45/68   | 0.005169 | 2 |
| 1276 | TRIM47             | TRIM47    | + | 61/96   | 0.005173 | 3 |
| 1277 | PR (nuclear)       | PGR       | - | 75/121  | 0.005306 | 2 |
| 1278 | IRF7               | IRF7      | + | 18/23   | 0.005311 | 2 |
| 1279 | BRG1               | SMARCA4   | + | 18/23   | 0.005311 | 1 |
| 1280 | FEM1A              | FEM1A     | - | 101/168 | 0.00534  | 3 |
| 1281 | DVL-3              | DVL3      | - | 62/98   | 0.005587 | 2 |
| 1283 | Nod1               | NOD1      | + | 32/46   | 0.005676 | 3 |
| 1282 | BRD4/NUT fusion    |           | + | 32/46   | 0.005676 | 2 |
| 1284 | NRIF3              | ITGB3BP   | - | 82/134  | 0.005976 | 3 |
| 1285 | MITF               | MITF      | + | 43/65   | 0.006251 | 2 |
| 1286 | GATA-3             | GATA3     | - | 12/14   | 0.00647  | 1 |
| 1287 | P4HB               | P4HB      | - | 89/147  | 0.006539 | 3 |
| 1288 | eEF1D              | EEF1D     | + | 74/120  | 0.006688 | 3 |
| 1290 | SEH1L              | SEH1L     | + | 52/81   | 0.007    | 3 |
| 1289 | Mitofusin 2        | MFN2      | - | 52/81   | 0.007    | 3 |

|      |               |         |   |        |          |   |
|------|---------------|---------|---|--------|----------|---|
| 1291 | EZH2          | EZH2    | + | 80/131 | 0.007059 | 2 |
| 1292 | microRNA 21   | MIR21   | - | 19/25  | 0.007317 | 2 |
| 1293 | Calcineurin A |         | - | 57/90  | 0.007433 | 2 |
| 1294 | NPL4          | NPLOC4  | + | 87/144 | 0.007685 | 3 |
| 1295 | SRRF          | HNRNPLL | + | 7/7    | 0.007813 | 2 |
| 1296 | PIAS2         | PIAS2   | - | 67/108 | 0.007875 | 2 |
| 1297 | DUB3          | USP17L2 | + | 31/45  | 0.008047 | 2 |
| 1298 | miR-20a-3p    | MIR20A  | + | 89/148 | 0.008421 | 3 |
| 1300 | PU.1          | SPI1    | + | 42/64  | 0.008429 | 2 |
| 1299 | RASA3         | RASA3   | - | 42/64  | 0.008429 | 3 |
| 1301 | CIRBP         | CIRBP   | + | 35/52  | 0.008767 | 2 |
| 1302 | Cyclophilin A | PPIA    | + | 74/121 | 0.008865 | 2 |
| 1303 | ATOH8         | ATOH8   | - | 39/59  | 0.009169 | 2 |
| 1304 | WHISTLE       | NSD3    | - | 80/132 | 0.009215 | 3 |
| 1305 | miR-600       | MIR600  | - | 36/54  | 0.009917 | 2 |
| 1306 | MIF           | MIF     | + | 71/116 | 0.00994  | 2 |

**Supplementary Table 2. Causal reasoning results using DEGs that has  $\log_2FC \geq 5$  or  $\leq -5$  and  $FDR \leq 0.05$ .**

| Key Hub |                  |           |                    |                                   |                             |                |
|---------|------------------|-----------|--------------------|-----------------------------------|-----------------------------|----------------|
| Rank    | Molecular Entity | Gene      | Predicted Activity | Correct/Total network predictions | Activity Prediction p-value | Calc. Distance |
| 1       | MAP3K2 (MEKK2)   | MAP3K2    | +                  | 30/31                             | 1.49E-08                    | 3              |
| 2       | PIAS4            | PIAS4     | -                  | 31/33                             | 6.54E-08                    | 3              |
| 4       | ErbB4            | ERBB4     | +                  | 26/27                             | 2.09E-07                    | 3              |
| 3       | ELKS             | ERC1      | +                  | 26/27                             | 2.09E-07                    | 3              |
| 5       | PD-1             | PDCD1     | -                  | 26/27                             | 2.09E-07                    | 3              |
| 6       | NCOA2            | NCOA2     | +                  | 22/22                             | 2.38E-07                    | 2              |
| 8       | c-Fos            | FOS       | +                  | 25/26                             | 4.02E-07                    | 2              |
| 7       | BTEB1            | KLF9      | -                  | 25/26                             | 4.02E-07                    | 3              |
| 10      | HNF1-alpha       | HNF1A     | +                  | 28/30                             | 4.34E-07                    | 3              |
| 9       | KIS              | UHMK1     | +                  | 28/30                             | 4.34E-07                    | 3              |
| 11      | IRF1             | IRF1      | +                  | 33/37                             | 5.42E-07                    | 3              |
| 12      | Fbxl19           | FBXL19    | -                  | 30/33                             | 7.01E-07                    | 3              |
| 13      | MIR205HG         | MIR205HG  | -                  | 24/25                             | 7.75E-07                    | 3              |
| 14      | NCOA3            | NCOA3     | +                  | 27/29                             | 8.12E-07                    | 2              |
| 15      | PIAS4            | PIAS4     | -                  | 27/29                             | 8.12E-07                    | 2              |
| 18      | IFNAR2           | IFNAR2    | +                  | 29/32                             | 1.28E-06                    | 3              |
| 16      | LOC145837        | DRAIC     | -                  | 29/32                             | 1.28E-06                    | 3              |
| 17      | miR-541-3p       | MIR541    | -                  | 29/32                             | 1.28E-06                    | 3              |
| 19      | TAFII70          | TAF6      | +                  | 23/24                             | 1.49E-06                    | 3              |
| 24      | NF-AT4(NFATC3)   | NFATC3    | +                  | 23/24                             | 1.49E-06                    | 3              |
| 25      | IRF1             | IRF1      | +                  | 23/24                             | 1.49E-06                    | 2              |
| 20      | Alpha-actinin 2  | ACTN2     | +                  | 23/24                             | 1.49E-06                    | 3              |
| 22      | Contactin 2      | CNTN2     | +                  | 23/24                             | 1.49E-06                    | 3              |
| 21      | miR-345-5p       | MIR345    | -                  | 23/24                             | 1.49E-06                    | 2              |
| 23      | Caspase-12       | CASP12    | -                  | 23/24                             | 1.49E-06                    | 3              |
| 26      | TRIM40           | TRIM40    | -                  | 26/28                             | 1.52E-06                    | 3              |
| 28      | ATF-5            | ATF5      | +                  | 31/35                             | 1.73E-06                    | 3              |
| 27      | LINC02605        | LINC02605 | +                  | 31/35                             | 1.73E-06                    | 3              |
| 29      | miR-383-5p       | MIR383    | -                  | 19/19                             | 1.91E-06                    | 2              |
| 34      | c-Src            | SRC       | +                  | 28/31                             | 2.33E-06                    | 3              |
| 30      | USP12            | USP12     | +                  | 28/31                             | 2.33E-06                    | 3              |
| 32      | CBP              | CREBBP    | +                  | 28/31                             | 2.33E-06                    | 2              |
| 33      | SHP-1            | PTPN6     | -                  | 28/31                             | 2.33E-06                    | 3              |
| 31      | LCoR (MLR2)      | LCOR      | -                  | 28/31                             | 2.33E-06                    | 3              |
| 37      | SRF              | SRF       | +                  | 25/27                             | 2.82E-06                    | 3              |
| 36      | BAF60c           | SMARCD3   | +                  | 25/27                             | 2.82E-06                    | 3              |
| 35      | miR-646          | MIR646    | -                  | 25/27                             | 2.82E-06                    | 3              |
| 40      | ALPHA-PIX        | ARHGEF6   | +                  | 22/23                             | 2.86E-06                    | 3              |
| 38      | PTTG3P           | PTTG3P    | +                  | 22/23                             | 2.86E-06                    | 3              |
| 39      | RIG-G            | IFIT3     | +                  | 22/23                             | 2.86E-06                    | 3              |
| 41      | p300             | EP300     | +                  | 30/34                             | 3.08E-06                    | 2              |
| 44      | PREX1            | PREX1     | +                  | 18/18                             | 3.82E-06                    | 3              |

|    |               |          |   |       |          |   |
|----|---------------|----------|---|-------|----------|---|
| 43 | Calgranulin A | S100A8   | + | 18/18 | 3.82E-06 | 3 |
| 42 | miR-502-5p    | MIR502   | - | 18/18 | 3.82E-06 | 2 |
| 46 | TBK1          | TBK1     | + | 27/30 | 4.22E-06 | 3 |
| 45 | miR-383-5p    | MIR383   | - | 27/30 | 4.22E-06 | 3 |
| 47 | PIG8          | EI24     | - | 27/30 | 4.22E-06 | 3 |
| 54 | BRG1          | SMARCA4  | + | 24/26 | 5.25E-06 | 2 |
| 52 | EG1           | MED28    | + | 24/26 | 5.25E-06 | 3 |
| 48 | miR-130a-3p   | MIR130A  | - | 24/26 | 5.25E-06 | 2 |
| 49 | PHLPPL        | PHLPP2   | - | 24/26 | 5.25E-06 | 3 |
| 51 | PPP2R2C       | PPP2R2C  | - | 24/26 | 5.25E-06 | 3 |
| 50 | NLRC5         | NLRC5    | - | 24/26 | 5.25E-06 | 3 |
| 53 | SHPS-1        | SIRPA    | - | 24/26 | 5.25E-06 | 3 |
| 57 | MSK1          | RPS6KA5  | + | 29/33 | 5.46E-06 | 3 |
| 55 | DOT1          | DOT1L    | + | 29/33 | 5.46E-06 | 3 |
| 56 | ARPP- 21      | ARPP21   | + | 29/33 | 5.46E-06 | 3 |
| 64 | c-Jun         | JUN      | + | 21/22 | 5.48E-06 | 2 |
| 65 | TERT          | TERT     | + | 21/22 | 5.48E-06 | 2 |
| 58 | TSLC1         | CADM1    | + | 21/22 | 5.48E-06 | 3 |
| 62 | MECOM         | MECOM    | - | 21/22 | 5.48E-06 | 2 |
| 59 | miR-548a-3p   | MIR548A1 | - | 21/22 | 5.48E-06 | 3 |
| 60 | miR-548a-3p   | MIR548A3 | - | 21/22 | 5.48E-06 | 3 |
| 61 | miR-548a-3p   | MIR548A2 | - | 21/22 | 5.48E-06 | 3 |
| 63 | SHP-1         | PTPN6    | - | 21/22 | 5.48E-06 | 2 |
| 66 | USP1          | USP1     | + | 31/36 | 6.46E-06 | 3 |
| 67 | Calgranulin B | S100A9   | + | 31/36 | 6.46E-06 | 3 |
| 70 | CDK3          | CDK3     | + | 26/29 | 7.62E-06 | 3 |
| 71 | IKK-alpha     | CHUK     | + | 26/29 | 7.62E-06 | 2 |
| 68 | WDR48         | WDR48    | + | 26/29 | 7.62E-06 | 3 |
| 69 | PHF8          | PHF8     | + | 26/29 | 7.62E-06 | 3 |
| 72 | CUX1          | CUX1     | - | 26/29 | 7.62E-06 | 3 |
| 83 | IRF1          | IRF1     | + | 17/17 | 7.63E-06 | 1 |
| 73 | Kalirin       | KALRN    | + | 17/17 | 7.63E-06 | 3 |
| 75 | GEFT          | ARHGEF25 | + | 17/17 | 7.63E-06 | 3 |
| 76 | PLEKHG4       | PLEKHG4  | + | 17/17 | 7.63E-06 | 3 |
| 82 | DBL           | MCF2     | + | 17/17 | 7.63E-06 | 3 |
| 79 | GGTase-I      | FNTA     | + | 17/17 | 7.63E-06 | 3 |
| 80 | GGTase-I      | PGGT1B   | + | 17/17 | 7.63E-06 | 3 |
| 78 | c-IAP2        | BIRC3    | + | 17/17 | 7.63E-06 | 2 |
| 74 | miR-4674      | MIR4674  | - | 17/17 | 7.63E-06 | 3 |
| 77 | RhoGAP1       | ARHGAP1  | - | 17/17 | 7.63E-06 | 3 |
| 81 | RhoGDI beta   | ARHGDI B | - | 17/17 | 7.63E-06 | 3 |
| 93 | KLF5          | KLF5     | + | 23/25 | 9.72E-06 | 2 |
| 89 | miR-221-5p    | MIR221   | + | 23/25 | 9.72E-06 | 3 |
| 84 | KIAA1914      | AFAP1L2  | + | 23/25 | 9.72E-06 | 3 |
| 87 | BAF170        | SMARCC2  | + | 23/25 | 9.72E-06 | 3 |
| 92 | Actin         |          | + | 23/25 | 9.72E-06 | 3 |
| 90 | HEYL          | HEYL     | - | 23/25 | 9.72E-06 | 3 |
| 86 | miR-488-5p    | MIR488   | - | 23/25 | 9.72E-06 | 3 |

|     |                     |              |   |       |          |   |
|-----|---------------------|--------------|---|-------|----------|---|
| 85  | PPP4C               | PPP4C        | - | 23/25 | 9.72E-06 | 3 |
| 91  | Sirtuin6            | SIRT6        | - | 23/25 | 9.72E-06 | 2 |
| 88  | TH1L                | NELFCD       | - | 23/25 | 9.72E-06 | 3 |
| 114 | VAV-3               | VAV3         | + | 20/21 | 1.05E-05 | 3 |
| 109 | GHR                 | GHR          | + | 20/21 | 1.05E-05 | 3 |
| 94  | DOT1                | DOT1L        | + | 20/21 | 1.05E-05 | 2 |
| 113 | HSP27               | HSPB1        | + | 20/21 | 1.05E-05 | 2 |
| 115 | MSN (moesin)        | MSN          | + | 20/21 | 1.05E-05 | 3 |
| 95  | ILT2                | LILRB1       | - | 20/21 | 1.05E-05 | 3 |
| 96  | Siglec-7            | SIGLEC7      | - | 20/21 | 1.05E-05 | 3 |
| 97  | BTLA                | BTLA         | - | 20/21 | 1.05E-05 | 3 |
| 98  | SIGLEC5             | SIGLEC5      | - | 20/21 | 1.05E-05 | 3 |
| 99  | CD244               | CD244        | - | 20/21 | 1.05E-05 | 3 |
| 100 | KIR2DL2             | KIR2DL2      | - | 20/21 | 1.05E-05 | 3 |
| 101 | CD33                | CD33         | - | 20/21 | 1.05E-05 | 3 |
| 102 | PIRB                | LILRB3       | - | 20/21 | 1.05E-05 | 3 |
| 103 | PIRB                | LOC107987462 | - | 20/21 | 1.05E-05 | 3 |
| 105 | Siglec-E            | SIGLEC9      | - | 20/21 | 1.05E-05 | 3 |
| 106 | Siglec-10           | SIGLEC10     | - | 20/21 | 1.05E-05 | 3 |
| 107 | KIR3DL1             | KIR3DL1      | - | 20/21 | 1.05E-05 | 3 |
| 108 | LIRB                |              | - | 20/21 | 1.05E-05 | 3 |
| 110 | NKG2A               | KLRC1        | - | 20/21 | 1.05E-05 | 3 |
| 112 | Fc gamma RII beta   | FCGR2B       | - | 20/21 | 1.05E-05 | 3 |
| 116 | LAIR1               | LAIR1        | - | 20/21 | 1.05E-05 | 3 |
| 117 | KIR2DL1             | KIR2DL1      | - | 20/21 | 1.05E-05 | 3 |
| 118 | ILT4                | LILRB2       | - | 20/21 | 1.05E-05 | 3 |
| 104 | CD84                | CD84         | - | 20/21 | 1.05E-05 | 3 |
| 111 | p16INK4             | CDKN2A       | - | 20/21 | 1.05E-05 | 2 |
| 120 | CBP                 | CREBBP       | + | 32/38 | 1.22E-05 | 3 |
| 119 | miR-149-5p          | MIR149       | - | 32/38 | 1.22E-05 | 3 |
| 122 | Karyopherin alpha 3 | KPNA3        | + | 25/28 | 1.37E-05 | 3 |
| 126 | c-Jun               | JUN          | + | 25/28 | 1.37E-05 | 3 |
| 128 | C/EBPbeta           | CEBPB        | + | 25/28 | 1.37E-05 | 2 |
| 125 | MURC                | CAVIN4       | + | 25/28 | 1.37E-05 | 3 |
| 123 | CIRBP               | CIRBP        | + | 25/28 | 1.37E-05 | 3 |
| 124 | EAP30               | SNF8         | + | 25/28 | 1.37E-05 | 3 |
| 127 | Cyclin C            | CCNC         | + | 25/28 | 1.37E-05 | 3 |
| 121 | miR-502-5p          | MIR502       | - | 25/28 | 1.37E-05 | 3 |
| 129 | NPAT                | NPAT         | + | 16/16 | 1.53E-05 | 3 |
| 130 | NFAT-90             | ILF3         | + | 16/16 | 1.53E-05 | 2 |
| 131 | Rac1                | RAC1         | + | 16/16 | 1.53E-05 | 2 |
| 132 | MEF2D               | MEF2D        | + | 27/31 | 1.70E-05 | 3 |
| 134 | M-CSF receptor      | CSF1R        | + | 27/31 | 1.70E-05 | 3 |
| 137 | IFN-alpha/beta      | IFNAR2       | + | 27/31 | 1.70E-05 | 3 |
| 138 | IFN-alpha/beta      | IFNAR1       | + | 27/31 | 1.70E-05 | 3 |
| 135 | NIK(MAP3K14)        | MAP3K14      | + | 27/31 | 1.70E-05 | 3 |
| 136 | Paxillin            | PXN          | + | 27/31 | 1.70E-05 | 3 |
| 133 | miR-520c-3p         | MIR520C      | - | 27/31 | 1.70E-05 | 3 |

|     |                   |           |   |       |          |   |
|-----|-------------------|-----------|---|-------|----------|---|
| 147 | STAT2             | STAT2     | + | 22/24 | 1.79E-05 | 2 |
| 148 | alpha-4/beta-1    | ITGA4     | + | 22/24 | 1.79E-05 | 3 |
| 149 | alpha-4/beta-1    | ITGB1     | + | 22/24 | 1.79E-05 | 3 |
| 146 | c-Src             | SRC       | + | 22/24 | 1.79E-05 | 2 |
| 150 | MSK1              | RPS6KA5   | + | 22/24 | 1.79E-05 | 2 |
| 144 | G-protein alpha-s | GNAS      | + | 22/24 | 1.79E-05 | 3 |
| 141 | ANAPC1            | ANAPC1    | + | 22/24 | 1.79E-05 | 3 |
| 145 | PHAP1 (pp32)      | ANP32A    | + | 22/24 | 1.79E-05 | 3 |
| 142 | DDR1              | DDR1      | - | 22/24 | 1.79E-05 | 3 |
| 139 | NDPK B            | NME1-NME2 | - | 22/24 | 1.79E-05 | 3 |
| 140 | NDPK B            | NME2      | - | 22/24 | 1.79E-05 | 3 |
| 143 | APG5              | ATG5      | - | 22/24 | 1.79E-05 | 3 |
| 151 | MECOM             | MECOM     | - | 29/34 | 1.93E-05 | 3 |
| 155 | PAK1              | PAK1      | + | 19/20 | 2.00E-05 | 2 |
| 156 | TBK1              | TBK1      | + | 19/20 | 2.00E-05 | 2 |
| 152 | UBE1L             | UBA7      | + | 19/20 | 2.00E-05 | 3 |
| 153 | miR-330-5p        | MIR330    | - | 19/20 | 2.00E-05 | 2 |
| 154 | CTLA-4            | CTLA4     | - | 19/20 | 2.00E-05 | 3 |
| 157 | UTX               | KDM6A     | + | 31/37 | 2.06E-05 | 3 |
| 165 | Tyk2              | TYK2      | + | 24/27 | 2.46E-05 | 3 |
| 158 | D52               | TPD52     | + | 24/27 | 2.46E-05 | 3 |
| 161 | CAP1              | CAP1      | + | 24/27 | 2.46E-05 | 3 |
| 162 | CREB3             | CREB3     | - | 24/27 | 2.46E-05 | 3 |
| 159 | miR-1470          | MIR1470   | - | 24/27 | 2.46E-05 | 3 |
| 160 | miR-330-5p        | MIR330    | - | 24/27 | 2.46E-05 | 3 |
| 163 | miR-448-3p        | MIR448    | - | 24/27 | 2.46E-05 | 3 |
| 164 | PEDF (serpinF1)   | SERPINF1  | - | 24/27 | 2.46E-05 | 3 |
| 169 | c-Fos             | FOS       | + | 26/30 | 2.97E-05 | 3 |
| 170 | STAT2             | STAT2     | + | 26/30 | 2.97E-05 | 3 |
| 167 | COMMD1 (MURR1)    | COMMD1    | - | 26/30 | 2.97E-05 | 3 |
| 168 | PPAR-alpha        | PPARA     | - | 26/30 | 2.97E-05 | 3 |
| 166 | DET1              | DET1      | - | 26/30 | 2.97E-05 | 3 |
| 171 | PLC-beta2         | PLCB2     | + | 15/15 | 3.05E-05 | 3 |
| 172 | NBAT1             | NBAT1     | + | 21/23 | 3.30E-05 | 3 |
| 178 | alpha-IIb/beta-3  | ITGA2B    | + | 21/23 | 3.30E-05 | 3 |
| 179 | alpha-IIb/beta-3  | ITGB3     | + | 21/23 | 3.30E-05 | 3 |
| 173 | ZAK               | MAP3K20   | + | 21/23 | 3.30E-05 | 3 |
| 175 | OGG1              | OGG1      | + | 21/23 | 3.30E-05 | 2 |
| 174 | LYRIC             | MTDH      | + | 21/23 | 3.30E-05 | 2 |
| 176 | Nova1             | NOVA1     | + | 21/23 | 3.30E-05 | 3 |
| 177 | miR-542-3p        | MIR542    | - | 21/23 | 3.30E-05 | 3 |
| 180 | Connexin 43       | GJA1      | - | 28/33 | 3.31E-05 | 3 |
| 181 | FAK1              | PTK2      | + | 30/36 | 3.48E-05 | 3 |
| 185 | p38beta (MAPK11)  | MAPK11    | + | 18/19 | 3.82E-05 | 2 |
| 182 | PEAR1             | PEAR1     | + | 18/19 | 3.82E-05 | 3 |
| 183 | USP13             | USP13     | + | 18/19 | 3.82E-05 | 2 |
| 184 | Biglycan          | BGN       | + | 18/19 | 3.82E-05 | 3 |
| 186 | FKBP4             | FKBP4     | + | 18/19 | 3.82E-05 | 2 |

|     |                     |          |   |       |          |   |
|-----|---------------------|----------|---|-------|----------|---|
| 187 | Lnk                 | SH2B3    | - | 18/19 | 3.82E-05 | 3 |
| 188 | Karyopherin alpha 2 | KPNA2    | + | 23/26 | 4.40E-05 | 2 |
| 192 | RMRP                | RMRP     | + | 23/26 | 4.40E-05 | 3 |
| 189 | CCR2                | CCR2     | + | 23/26 | 4.40E-05 | 3 |
| 198 | ACKR3               | ACKR3    | + | 23/26 | 4.40E-05 | 3 |
| 195 | 4EHP                | EIF4E2   | + | 23/26 | 4.40E-05 | 3 |
| 196 | AF-9                | MLLT3    | + | 23/26 | 4.40E-05 | 3 |
| 199 | Cyclin T1           | CCNT1    | + | 23/26 | 4.40E-05 | 3 |
| 191 | miR-128-1-5p        | MIR128-1 | - | 23/26 | 4.40E-05 | 3 |
| 193 | mature miR-4429     | MIR4429  | - | 23/26 | 4.40E-05 | 3 |
| 197 | Csk                 | CSK      | - | 23/26 | 4.40E-05 | 3 |
| 190 | EG624219            | ANGPTL8  | - | 23/26 | 4.40E-05 | 3 |
| 194 | CDK5RAP3            | CDK5RAP3 | - | 23/26 | 4.40E-05 | 3 |
| 202 | CC2D1A              | CC2D1A   | + | 25/29 | 5.19E-05 | 3 |
| 204 | TRIO                | TRIO     | + | 25/29 | 5.19E-05 | 3 |
| 201 | TGM4                | TGM4     | + | 25/29 | 5.19E-05 | 3 |
| 200 | Homer 3             | HOMER3   | - | 25/29 | 5.19E-05 | 3 |
| 203 | PPP4R1              | PPP4R1   | - | 25/29 | 5.19E-05 | 3 |
| 205 | NFKBIE              | NFKBIE   | - | 25/29 | 5.19E-05 | 3 |
| 209 | KLF5                | KLF5     | + | 27/32 | 5.65E-05 | 3 |
| 210 | SMAD1               | SMAD1    | + | 27/32 | 5.65E-05 | 3 |
| 206 | BRD4/NUT fusion     |          | + | 27/32 | 5.65E-05 | 3 |
| 207 | EPC1                | EPC1     | + | 27/32 | 5.65E-05 | 3 |
| 208 | miR-766-5p          | MIR766   | - | 27/32 | 5.65E-05 | 3 |
| 211 | Protein kinase G1   | PRKG1    | + | 29/35 | 5.84E-05 | 3 |
| 212 | G-protein alpha-i2  | GNAI2    | + | 20/22 | 6.06E-05 | 3 |
| 215 | Migfilin            | FBLIM1   | + | 20/22 | 6.06E-05 | 3 |
| 213 | FXR                 | NR1H4    | - | 20/22 | 6.06E-05 | 2 |
| 214 | SNX5                | SNX5     | - | 20/22 | 6.06E-05 | 3 |
| 216 | SMRT                | NCOR2    | - | 20/22 | 6.06E-05 | 2 |
| 217 | CDK9                | CDK9     | + | 14/14 | 6.10E-05 | 2 |
| 231 | RET                 | RET      | + | 17/18 | 7.25E-05 | 2 |
| 230 | JAK2                | JAK2     | + | 17/18 | 7.25E-05 | 2 |
| 232 | Tyk2                | TYK2     | + | 17/18 | 7.25E-05 | 2 |
| 226 | SAD1 (USP39)        | USP39    | + | 17/18 | 7.25E-05 | 2 |
| 222 | CBP/P300            | EP300    | + | 17/18 | 7.25E-05 | 2 |
| 223 | CBP/P300            | CREBBP   | + | 17/18 | 7.25E-05 | 2 |
| 225 | RUVBL1              | RUVBL1   | + | 17/18 | 7.25E-05 | 2 |
| 228 | MUC1-CT             | MUC1     | + | 17/18 | 7.25E-05 | 2 |
| 235 | ISG15               | ISG15    | + | 17/18 | 7.25E-05 | 2 |
| 236 | IFRD1               | IFRD1    | + | 17/18 | 7.25E-05 | 2 |
| 227 | COMMD1 (MURR1)      | COMMD1   | - | 17/18 | 7.25E-05 | 2 |
| 219 | microRNA 103-1      | MIR103A1 | - | 17/18 | 7.25E-05 | 3 |
| 220 | miR-450a-5p         | MIR450A2 | - | 17/18 | 7.25E-05 | 2 |
| 221 | miR-450a-5p         | MIR450A1 | - | 17/18 | 7.25E-05 | 2 |
| 224 | miR-520c-3p         | MIR520C  | - | 17/18 | 7.25E-05 | 2 |
| 229 | miR-146a-5p         | MIR146A  | - | 17/18 | 7.25E-05 | 2 |
| 218 | CLIM1               | PDLIM1   | - | 17/18 | 7.25E-05 | 2 |

|     |                    |          |   |       |          |   |
|-----|--------------------|----------|---|-------|----------|---|
| 233 | CDC20              | CDC20    | - | 17/18 | 7.25E-05 | 2 |
| 234 | FAF1               | FAF1     | - | 17/18 | 7.25E-05 | 2 |
| 238 | miR-378b           | MIR378B  | + | 22/25 | 7.83E-05 | 3 |
| 240 | Nucleophosmin      | NPM1     | + | 22/25 | 7.83E-05 | 2 |
| 242 | CNK1               | CNKSR1   | + | 22/25 | 7.83E-05 | 3 |
| 237 | miR-3607-5p        | SNORD138 | - | 22/25 | 7.83E-05 | 3 |
| 239 | Ankyrin-G          | ANK3     | - | 22/25 | 7.83E-05 | 3 |
| 241 | DAXX               | DAXX     | - | 22/25 | 7.83E-05 | 2 |
| 243 | Calcyclin          | S100A6   | - | 22/25 | 7.83E-05 | 3 |
| 246 | NP220              | ZNF638   | + | 24/28 | 9.00E-05 | 3 |
| 258 | NET1               | NET1     | + | 24/28 | 9.00E-05 | 3 |
| 244 | TFG                | TFG      | + | 24/28 | 9.00E-05 | 3 |
| 250 | alpha-V/beta-5     | ITGB5    | + | 24/28 | 9.00E-05 | 3 |
| 251 | alpha-V/beta-5     | ITGAV    | + | 24/28 | 9.00E-05 | 3 |
| 256 | gp130              | IL6ST    | + | 24/28 | 9.00E-05 | 3 |
| 253 | BRD9               | BRD9     | + | 24/28 | 9.00E-05 | 3 |
| 249 | MIB1               | MIB1     | + | 24/28 | 9.00E-05 | 3 |
| 247 | RANBP7             | IPO7     | - | 24/28 | 9.00E-05 | 3 |
| 245 | miR-26b-3p         | MIR26B   | - | 24/28 | 9.00E-05 | 3 |
| 248 | miR-520b-3p        | MIR520B  | - | 24/28 | 9.00E-05 | 3 |
| 252 | miR-520d-5p        | MIR520D  | - | 24/28 | 9.00E-05 | 3 |
| 254 | CtBP1              | CTBP1    | - | 24/28 | 9.00E-05 | 3 |
| 255 | GANP               | MCM3AP   | - | 24/28 | 9.00E-05 | 3 |
| 257 | CtBP               |          | - | 24/28 | 9.00E-05 | 3 |
| 262 | NF-AT1(NFATC2)     | NFATC2   | + | 26/31 | 9.61E-05 | 3 |
| 261 | Rac3               | RAC3     | + | 26/31 | 9.61E-05 | 3 |
| 263 | p90RSK2(RPS6KA3)   | RPS6KA3  | + | 26/31 | 9.61E-05 | 3 |
| 259 | miR-300-3p         | MIR300   | - | 26/31 | 9.61E-05 | 3 |
| 260 | miR-33a-3p         | MIR33A   | - | 26/31 | 9.61E-05 | 3 |
| 264 | C/EBPbeta          | CEBPB    | + | 28/34 | 9.76E-05 | 3 |
| 272 | Pim-1              | PIM1     | + | 19/21 | 1.11E-04 | 2 |
| 273 | TPL2(MAP3K8)       | MAP3K8   | + | 19/21 | 1.11E-04 | 2 |
| 274 | p90RSK3(RPS6KA2)   | RPS6KA2  | + | 19/21 | 1.11E-04 | 3 |
| 269 | G-protein alpha-12 | GNA12    | + | 19/21 | 1.11E-04 | 3 |
| 267 | ANKRD17            | ANKRD17  | + | 19/21 | 1.11E-04 | 3 |
| 265 | SNFT               | BATF3    | - | 19/21 | 1.11E-04 | 3 |
| 271 | PPAR-alpha         | PPARA    | - | 19/21 | 1.11E-04 | 2 |
| 268 | XIST               | XIST     | - | 19/21 | 1.11E-04 | 2 |
| 266 | BRMS1              | BRMS1    | - | 19/21 | 1.11E-04 | 2 |
| 270 | DTX4               | DTX4     | - | 19/21 | 1.11E-04 | 3 |
| 276 | ATP7A              | ATP7A    | + | 13/13 | 1.22E-04 | 3 |
| 277 | RPRD1B             | RPRD1B   | + | 13/13 | 1.22E-04 | 2 |
| 278 | HSPC142            | BABAM1   | + | 13/13 | 1.22E-04 | 3 |
| 275 | MBL2               | MBL2     | - | 13/13 | 1.22E-04 | 3 |
| 279 | PDLIM2             | PDLIM2   | - | 13/13 | 1.22E-04 | 2 |
| 296 | Fra-1              | FOSL1    | + | 16/17 | 1.37E-04 | 3 |
| 285 | MIR31HG            | MIR31HG  | + | 16/17 | 1.37E-04 | 2 |
| 288 | FGFR3              | FGFR3    | + | 16/17 | 1.37E-04 | 2 |



|     |                     |          |   |       |          |   |
|-----|---------------------|----------|---|-------|----------|---|
| 280 | A2M                 | A2M      | + | 16/17 | 1.37E-04 | 3 |
| 290 | IL-6 receptor       | IL6R     | + | 16/17 | 1.37E-04 | 2 |
| 291 | IL-6 receptor       | IL6ST    | + | 16/17 | 1.37E-04 | 2 |
| 293 | gp130               | IL6ST    | + | 16/17 | 1.37E-04 | 2 |
| 294 | IFN-alpha/beta      | IFNAR2   | + | 16/17 | 1.37E-04 | 2 |
| 295 | IFN-alpha/beta      | IFNAR1   | + | 16/17 | 1.37E-04 | 2 |
| 301 | IL-22 receptor      | IL10RB   | + | 16/17 | 1.37E-04 | 2 |
| 302 | IL-22 receptor      | IL22RA1  | + | 16/17 | 1.37E-04 | 2 |
| 292 | Syk                 | SYK      | + | 16/17 | 1.37E-04 | 2 |
| 300 | IRAK1               | IRAK1    | + | 16/17 | 1.37E-04 | 2 |
| 297 | PTAFR               | PTAFR    | + | 16/17 | 1.37E-04 | 3 |
| 281 | PSMC3               | PSMC3    | + | 16/17 | 1.37E-04 | 2 |
| 284 | RIG-I               | DDX58    | + | 16/17 | 1.37E-04 | 2 |
| 286 | ANAPC4              | ANAPC4   | + | 16/17 | 1.37E-04 | 3 |
| 287 | RIG-G               | IFIT3    | + | 16/17 | 1.37E-04 | 2 |
| 298 | CUX1                | CUX1     | - | 16/17 | 1.37E-04 | 2 |
| 289 | FasL(TNFSF6)        | FASLG    | - | 16/17 | 1.37E-04 | 3 |
| 282 | PTPN2               | PTPN2    | - | 16/17 | 1.37E-04 | 2 |
| 299 | G-protein alpha-i1  | GNAI1    | - | 16/17 | 1.37E-04 | 3 |
| 283 | SLAP                | SLA      | - | 16/17 | 1.37E-04 | 3 |
| 303 | NFKBIE              | NFKBIE   | - | 16/17 | 1.37E-04 | 2 |
| 304 | HOXB-AS1            | HOXB-AS1 | + | 21/24 | 1.39E-04 | 3 |
| 313 | Cardiotrophin-1     | CTF1     | + | 21/24 | 1.39E-04 | 3 |
| 309 | GFRalpha1           | GFRA1    | + | 21/24 | 1.39E-04 | 3 |
| 310 | IL-3 receptor       | CSF2RB   | + | 21/24 | 1.39E-04 | 3 |
| 311 | IL-3 receptor       | IL3RA    | + | 21/24 | 1.39E-04 | 3 |
| 308 | Calmyrin            | CIB1     | + | 21/24 | 1.39E-04 | 3 |
| 312 | NCAM1               | NCAM1    | + | 21/24 | 1.39E-04 | 3 |
| 305 | NKRF                | NKRF     | - | 21/24 | 1.39E-04 | 3 |
| 306 | CHFR                | CHFR     | - | 21/24 | 1.39E-04 | 3 |
| 307 | CPEB3               | CPEB3    | - | 21/24 | 1.39E-04 | 3 |
| 318 | IL-23 receptor      | IL23R    | + | 23/27 | 1.55E-04 | 3 |
| 319 | IL-23 receptor      | IL12RB1  | + | 23/27 | 1.55E-04 | 3 |
| 321 | FAK1                | PTK2     | + | 23/27 | 1.55E-04 | 2 |
| 322 | SGK1                | SGK1     | + | 23/27 | 1.55E-04 | 3 |
| 314 | eIF3S3              | EIF3H    | + | 23/27 | 1.55E-04 | 3 |
| 316 | SLM-2               | KHDRBS3  | + | 23/27 | 1.55E-04 | 3 |
| 315 | miR-3173-3p         | MIR3173  | - | 23/27 | 1.55E-04 | 3 |
| 317 | TRIM35              | TRIM35   | - | 23/27 | 1.55E-04 | 3 |
| 320 | PDLIM2              | PDLIM2   | - | 23/27 | 1.55E-04 | 3 |
| 323 | PRMT6               | PRMT6    | + | 29/36 | 1.56E-04 | 3 |
| 324 | OGG1                | OGG1     | + | 29/36 | 1.56E-04 | 3 |
| 326 | ERG                 | ERG      | + | 27/33 | 1.62E-04 | 3 |
| 325 | ABL2                | ABL2     | + | 27/33 | 1.62E-04 | 3 |
| 327 | Karyopherin alpha 1 | KPNA1    | + | 25/30 | 1.63E-04 | 3 |
| 333 | VEGFR-1             | FLT1     | + | 25/30 | 1.63E-04 | 3 |
| 328 | NDR1 (STK38)        | STK38    | + | 25/30 | 1.63E-04 | 3 |
| 331 | CaMK IV             | CAMK4    | + | 25/30 | 1.63E-04 | 3 |

|     |                     |         |   |       |          |   |
|-----|---------------------|---------|---|-------|----------|---|
| 329 | Semenogelin I       | SEMG1   | + | 25/30 | 1.63E-04 | 3 |
| 330 | DPF3                | DPF3    | + | 25/30 | 1.63E-04 | 3 |
| 334 | GATA-2              | GATA2   | - | 25/30 | 1.63E-04 | 3 |
| 332 | I-kB                |         | - | 25/30 | 1.63E-04 | 3 |
| 335 | KCTD20              | KCTD20  | + | 18/20 | 2.01E-04 | 3 |
| 343 | Karyopherin alpha 1 | KPNA1   | + | 18/20 | 2.01E-04 | 2 |
| 360 | IRF9                | IRF9    | + | 18/20 | 2.01E-04 | 2 |
| 339 | TSLPR               | CRLF2   | + | 18/20 | 2.01E-04 | 3 |
| 340 | TSLPR               | IL7R    | + | 18/20 | 2.01E-04 | 3 |
| 341 | OSM receptor        | IL6ST   | + | 18/20 | 2.01E-04 | 3 |
| 342 | OSM receptor        | OSMR    | + | 18/20 | 2.01E-04 | 3 |
| 350 | Fc gamma RI         | FCGR1A  | + | 18/20 | 2.01E-04 | 3 |
| 351 | CD79 complex        | CD79A   | + | 18/20 | 2.01E-04 | 3 |
| 352 | CD79 complex        | CD79B   | + | 18/20 | 2.01E-04 | 3 |
| 355 | IL-7 receptor       | IL2RG   | + | 18/20 | 2.01E-04 | 3 |
| 356 | IL-7 receptor       | IL7R    | + | 18/20 | 2.01E-04 | 3 |
| 357 | Fc epsilon RI       | FCER1A  | + | 18/20 | 2.01E-04 | 3 |
| 358 | Fc epsilon RI       | MS4A2   | + | 18/20 | 2.01E-04 | 3 |
| 359 | Fc epsilon RI       | FCER1G  | + | 18/20 | 2.01E-04 | 3 |
| 362 | IL-2R beta chain    | IL2RB   | + | 18/20 | 2.01E-04 | 3 |
| 363 | SGK1                | SGK1    | + | 18/20 | 2.01E-04 | 2 |
| 344 | MTCP1(p13)          | MTCP1   | + | 18/20 | 2.01E-04 | 3 |
| 345 | CLIP3               | CLIP3   | + | 18/20 | 2.01E-04 | 3 |
| 336 | HTR2A               | HTR2A   | + | 18/20 | 2.01E-04 | 3 |
| 338 | SMC1                | SMC1A   | + | 18/20 | 2.01E-04 | 3 |
| 348 | TCL1b               | TCL1B   | + | 18/20 | 2.01E-04 | 3 |
| 361 | Esrra               | ESRRA   | - | 18/20 | 2.01E-04 | 3 |
| 337 | miR-520b-3p         | MIR520B | - | 18/20 | 2.01E-04 | 2 |
| 353 | miR-211-3p          | MIR211  | - | 18/20 | 2.01E-04 | 3 |
| 346 | KDM2A               | KDM2A   | - | 18/20 | 2.01E-04 | 2 |
| 347 | APG12               | ATG12   | - | 18/20 | 2.01E-04 | 3 |
| 349 | CD63                | CD63    | - | 18/20 | 2.01E-04 | 3 |
| 354 | FBXL7               | FBXL7   | - | 18/20 | 2.01E-04 | 3 |
| 380 | TLR6                | TLR6    | + | 12/12 | 2.44E-04 | 3 |
| 377 | p90Rsk              |         | + | 20/23 | 2.44E-04 | 3 |
| 378 | JNK2(MAPK9)         | MAPK9   | + | 20/23 | 2.44E-04 | 2 |
| 367 | BRD9                | BRD9    | + | 12/12 | 2.44E-04 | 2 |
| 372 | mGluR5              | GRM5    | + | 20/23 | 2.44E-04 | 3 |
| 369 | STING (TMEM173)     | STING1  | + | 12/12 | 2.44E-04 | 2 |
| 370 | XAF1                | XAF1    | + | 20/23 | 2.44E-04 | 2 |
| 374 | NFKBID              | NFKBID  | + | 20/23 | 2.44E-04 | 3 |
| 379 | FKBP5               | FKBP5   | + | 12/12 | 2.44E-04 | 2 |
| 364 | miR-1299            | MIR1299 | - | 12/12 | 2.44E-04 | 2 |
| 376 | FGFR4               | FGFR4   | - | 20/23 | 2.44E-04 | 3 |
| 368 | Chymase             | CMA1    | - | 12/12 | 2.44E-04 | 3 |
| 373 | PLC-beta3           | PLCB3   | - | 20/23 | 2.44E-04 | 3 |
| 365 | MGEA5               | OGA     | - | 20/23 | 2.44E-04 | 3 |
| 375 | UBE3C               | UBE3C   | - | 20/23 | 2.44E-04 | 3 |

|     |                    |          |   |       |          |   |
|-----|--------------------|----------|---|-------|----------|---|
| 366 | SHARP (SPEN)       | SPEN     | - | 20/23 | 2.44E-04 | 3 |
| 371 | IRAS               | NISCH    | - | 20/23 | 2.44E-04 | 3 |
| 382 | IKK-alpha          | CHUK     | + | 28/35 | 2.54E-04 | 3 |
| 381 | DACH1              | DACH1    | - | 28/35 | 2.54E-04 | 3 |
| 383 | UBF                | UBTF     | + | 15/16 | 2.59E-04 | 3 |
| 399 | KLF6               | KLF6     | + | 15/16 | 2.59E-04 | 2 |
| 404 | CREB1              | CREB1    | + | 15/16 | 2.59E-04 | 2 |
| 409 | STAT1              | STAT1    | + | 15/16 | 2.59E-04 | 1 |
| 410 | Tyro3              | TYRO3    | + | 15/16 | 2.59E-04 | 3 |
| 403 | CNTF               | CNTF     | + | 15/16 | 2.59E-04 | 3 |
| 415 | LIF                | LIF      | + | 15/16 | 2.59E-04 | 3 |
| 397 | Plexin A2          | PLXNA2   | + | 15/16 | 2.59E-04 | 3 |
| 413 | IL6RA              | IL6R     | + | 15/16 | 2.59E-04 | 3 |
| 414 | IL4RA              | IL4R     | + | 15/16 | 2.59E-04 | 3 |
| 384 | USP17              | USP17L26 | + | 15/16 | 2.59E-04 | 3 |
| 385 | USP17              | USP17L24 | + | 15/16 | 2.59E-04 | 3 |
| 386 | USP17              | USP17L30 | + | 15/16 | 2.59E-04 | 3 |
| 387 | USP17              | USP17L25 | + | 15/16 | 2.59E-04 | 3 |
| 388 | USP17              | USP17L29 | + | 15/16 | 2.59E-04 | 3 |
| 389 | USP17              | USP17L27 | + | 15/16 | 2.59E-04 | 3 |
| 390 | USP17              | USP17L28 | + | 15/16 | 2.59E-04 | 3 |
| 395 | G-protein alpha-13 | GNA13    | + | 15/16 | 2.59E-04 | 3 |
| 394 | PRDX1              | PRDX1    | + | 15/16 | 2.59E-04 | 2 |
| 393 | D52                | TPD52    | + | 15/16 | 2.59E-04 | 2 |
| 400 | PSTPIP2            | PSTPIP2  | + | 15/16 | 2.59E-04 | 2 |
| 401 | DPF3               | DPF3     | + | 15/16 | 2.59E-04 | 2 |
| 402 | CD3 zeta           | CD247    | + | 15/16 | 2.59E-04 | 3 |
| 405 | DAP12              | TYROBP   | + | 15/16 | 2.59E-04 | 3 |
| 407 | PHAP1 (pp32)       | ANP32A   | + | 15/16 | 2.59E-04 | 2 |
| 412 | DAB1               | DAB1     | + | 15/16 | 2.59E-04 | 3 |
| 396 | FOXP3              | FOXP3    | - | 15/16 | 2.59E-04 | 2 |
| 411 | NF-kB2 (p100)      | NFKB2    | - | 15/16 | 2.59E-04 | 2 |
| 408 | SHP-2              | PTPN11   | - | 15/16 | 2.59E-04 | 2 |
| 391 | IRAKM              | IRAK3    | - | 15/16 | 2.59E-04 | 3 |
| 392 | SMURF1             | SMURF1   | - | 15/16 | 2.59E-04 | 2 |
| 398 | NFKBIB             | NFKBIB   | - | 15/16 | 2.59E-04 | 2 |
| 406 | I-kB               |          | - | 15/16 | 2.59E-04 | 2 |
| 420 | alpha-V/beta-1     | ITGAV    | + | 22/26 | 2.67E-04 | 3 |
| 421 | alpha-V/beta-1     | ITGB1    | + | 22/26 | 2.67E-04 | 3 |
| 430 | ITGB8              | ITGB8    | + | 22/26 | 2.67E-04 | 3 |
| 434 | Dcc                | DCC      | + | 22/26 | 2.67E-04 | 3 |
| 435 | IL-10 receptor     | IL10RB   | + | 22/26 | 2.67E-04 | 3 |
| 436 | IL-10 receptor     | IL10RA   | + | 22/26 | 2.67E-04 | 3 |
| 416 | GAK                | GAK      | + | 22/26 | 2.67E-04 | 3 |
| 429 | SFK                |          | + | 22/26 | 2.67E-04 | 3 |
| 423 | BAP1               | BAP1     | + | 22/26 | 2.67E-04 | 3 |
| 432 | PHF20              | PHF20    | + | 22/26 | 2.67E-04 | 3 |
| 437 | HMG14              | HMGN1    | + | 22/26 | 2.67E-04 | 3 |

|     |                    |          |   |       |          |   |
|-----|--------------------|----------|---|-------|----------|---|
| 418 | miR-130b-3p        | MIR130B  | - | 22/26 | 2.67E-04 | 2 |
| 425 | miR-551a           | MIR551A  | - | 22/26 | 2.67E-04 | 3 |
| 426 | miR-548x-3p        | MIR548X2 | - | 22/26 | 2.67E-04 | 3 |
| 427 | miR-548x-3p        | MIR548X  | - | 22/26 | 2.67E-04 | 3 |
| 428 | miR-22-5p          | MIR22    | - | 22/26 | 2.67E-04 | 3 |
| 433 | miR-129-1-3p       | MIR129-1 | - | 22/26 | 2.67E-04 | 3 |
| 422 | KIR2DL4            | KIR2DL4  | - | 22/26 | 2.67E-04 | 3 |
| 431 | QIK                | SIK2     | - | 22/26 | 2.67E-04 | 3 |
| 424 | Granzyme M         | GZMM     | - | 22/26 | 2.67E-04 | 3 |
| 417 | M33                | CBX2     | - | 22/26 | 2.67E-04 | 3 |
| 419 | KIF26A             | KIF26A   | - | 22/26 | 2.67E-04 | 3 |
| 442 | TPL2(MAP3K8)       | MAP3K8   | + | 26/32 | 2.68E-04 | 3 |
| 439 | Usp24              | USP24    | + | 26/32 | 2.68E-04 | 3 |
| 438 | Bcl-6              | BCL6     | - | 26/32 | 2.68E-04 | 3 |
| 441 | miR-297            | MIR297   | - | 26/32 | 2.68E-04 | 3 |
| 440 | IKBZ               | NFKBIZ   | - | 26/32 | 2.68E-04 | 3 |
| 444 | PELP1              | PELP1    | + | 24/29 | 2.73E-04 | 3 |
| 453 | c-Rel (NF-kB)      | REL      | + | 24/29 | 2.73E-04 | 3 |
| 451 | c-Kit              | KIT      | + | 24/29 | 2.73E-04 | 3 |
| 452 | CD69               | CD69     | + | 24/29 | 2.73E-04 | 3 |
| 447 | MOZ                | KAT6A    | + | 24/29 | 2.73E-04 | 3 |
| 446 | CPEB4              | CPEB4    | + | 24/29 | 2.73E-04 | 3 |
| 448 | CRSP8 (CRSP34)     | MED27    | + | 24/29 | 2.73E-04 | 3 |
| 443 | HIPK1              | HIPK1    | - | 24/29 | 2.73E-04 | 3 |
| 445 | UACA               | UACA     | - | 24/29 | 2.73E-04 | 3 |
| 449 | TRIM26             | TRIM26   | - | 24/29 | 2.73E-04 | 3 |
| 450 | Par-4              | PAWR     | - | 24/29 | 2.73E-04 | 3 |
| 458 | Glycoprotein VI    | GP6      | + | 17/19 | 3.64E-04 | 3 |
| 461 | Fc epsilon RI beta | MS4A2    | + | 17/19 | 3.64E-04 | 3 |
| 468 | alpha-6/beta-4     | ITGA6    | + | 17/19 | 3.64E-04 | 3 |
| 469 | alpha-6/beta-4     | ITGB4    | + | 17/19 | 3.64E-04 | 3 |
| 454 | CaMK II gamma      | CAMK2G   | + | 17/19 | 3.64E-04 | 2 |
| 464 | CaMK IV            | CAMK4    | + | 17/19 | 3.64E-04 | 2 |
| 465 | JAK1               | JAK1     | + | 17/19 | 3.64E-04 | 2 |
| 466 | NIK(MAP3K14)       | MAP3K14  | + | 17/19 | 3.64E-04 | 2 |
| 455 | Unc-119            | UNC119   | + | 17/19 | 3.64E-04 | 3 |
| 460 | SAP                | SH2D1A   | + | 17/19 | 3.64E-04 | 3 |
| 462 | Thy-1              | THY1     | + | 17/19 | 3.64E-04 | 3 |
| 456 | Menin              | MEN1     | - | 17/19 | 3.64E-04 | 2 |
| 457 | miR-224-3p         | MIR224   | - | 17/19 | 3.64E-04 | 3 |
| 459 | IKBZ               | NFKBIZ   | - | 17/19 | 3.64E-04 | 2 |
| 463 | Cullin 2           | CUL2     | - | 17/19 | 3.64E-04 | 2 |
| 467 | E-cadherin         | CDH1     | - | 17/19 | 3.64E-04 | 2 |
| 472 | CDK9               | CDK9     | + | 27/34 | 4.11E-04 | 3 |
| 471 | RBM8 (Y14)         | RBM8A    | + | 27/34 | 4.11E-04 | 3 |
| 470 | XIST               | XIST     | - | 27/34 | 4.11E-04 | 3 |
| 477 | MOZ                | KAT6A    | + | 19/22 | 4.28E-04 | 2 |
| 476 | Ephrin-B2 (CTF2)   | EFNB2    | + | 19/22 | 4.28E-04 | 3 |

|     |                   |          |   |       |          |   |
|-----|-------------------|----------|---|-------|----------|---|
| 479 | GFI-1             | GFI1     | - | 19/22 | 4.28E-04 | 2 |
| 473 | miR-7-5p          | MIR7-1   | - | 19/22 | 4.28E-04 | 2 |
| 474 | miR-7-5p          | MIR7-2   | - | 19/22 | 4.28E-04 | 2 |
| 475 | miR-7-5p          | MIR7-3   | - | 19/22 | 4.28E-04 | 2 |
| 478 | ING4              | ING4     | - | 19/22 | 4.28E-04 | 2 |
| 480 | Sequestosome      | SQSTM1   | - | 19/22 | 4.28E-04 | 2 |
| 485 | NR2E3             | NR2E3    | + | 25/31 | 4.39E-04 | 3 |
| 487 | p38alpha (MAPK14) | MAPK14   | + | 25/31 | 4.39E-04 | 3 |
| 488 | Cyclophilin A     | PPIA     | + | 25/31 | 4.39E-04 | 3 |
| 486 | Nucleophosmin     | NPM1     | + | 25/31 | 4.39E-04 | 3 |
| 481 | NF-kB1 (p105)     | NFKB1    | - | 25/31 | 4.39E-04 | 3 |
| 482 | miR-512-5p        | MIR512-2 | - | 25/31 | 4.39E-04 | 3 |
| 483 | miR-512-5p        | MIR512-1 | - | 25/31 | 4.39E-04 | 3 |
| 484 | miR-653-5p        | MIR653   | - | 25/31 | 4.39E-04 | 3 |
| 503 | GABP alpha        | GABPA    | + | 21/25 | 4.55E-04 | 3 |
| 495 | CENTA2            | ADAP2    | + | 21/25 | 4.55E-04 | 3 |
| 502 | ECT2              | ECT2     | + | 21/25 | 4.55E-04 | 3 |
| 492 | LRP1              | LRP1     | + | 21/25 | 4.55E-04 | 3 |
| 498 | IL-4R type I      | IL4R     | + | 21/25 | 4.55E-04 | 3 |
| 499 | IL-4R type I      | IL2RG    | + | 21/25 | 4.55E-04 | 3 |
| 501 | ADAM12            | ADAM12   | + | 21/25 | 4.55E-04 | 3 |
| 500 | PKM2              | PKM      | + | 21/25 | 4.55E-04 | 2 |
| 489 | IWS1              | IWS1     | + | 21/25 | 4.55E-04 | 3 |
| 493 | METTL3            | METTL3   | + | 21/25 | 4.55E-04 | 2 |
| 494 | SFRS3             | SRSF3    | + | 21/25 | 4.55E-04 | 3 |
| 497 | PBXIP1            | PBXIP1   | + | 21/25 | 4.55E-04 | 3 |
| 490 | miR-1298-5p       | MIR1298  | - | 21/25 | 4.55E-04 | 3 |
| 491 | miR-3188          | MIR3188  | - | 21/25 | 4.55E-04 | 3 |
| 496 | RPL11             | RPL11    | - | 21/25 | 4.55E-04 | 3 |
| 505 | AF-10             | MLLT10   | + | 23/28 | 4.56E-04 | 3 |
| 504 | Calpain 3         | CAPN3    | + | 23/28 | 4.56E-04 | 3 |
| 507 | Bid               | BID      | + | 23/28 | 4.56E-04 | 3 |
| 508 | MATK              | MATK     | - | 23/28 | 4.56E-04 | 3 |
| 506 | Adenosine A2b     | ADORA2B  | - | 23/28 | 4.56E-04 | 3 |
| 510 | DEAF              | DEAF1    | + | 11/11 | 4.88E-04 | 2 |
| 534 | RelA (p65 NF-kB)  | RELA     | + | 14/15 | 4.88E-04 | 1 |
| 530 | DOCK1             | DOCK1    | + | 14/15 | 4.88E-04 | 3 |
| 526 | ErbB4             | ERBB4    | + | 14/15 | 4.88E-04 | 2 |
| 532 | ActRIIA           | ACVR2A   | + | 14/15 | 4.88E-04 | 3 |
| 533 | PDGF-R-beta       | PDGFRB   | + | 14/15 | 4.88E-04 | 2 |
| 517 | FGF21             | FGF21    | + | 14/15 | 4.88E-04 | 3 |
| 521 | MGF               | KITLG    | + | 14/15 | 4.88E-04 | 3 |
| 527 | IKK (cat)         | IKKBK    | + | 14/15 | 4.88E-04 | 2 |
| 528 | IKK (cat)         | CHUK     | + | 14/15 | 4.88E-04 | 2 |
| 535 | AGTR1             | AGTR1    | + | 14/15 | 4.88E-04 | 2 |
| 516 | BCDIN3D           | BCDIN3D  | + | 14/15 | 4.88E-04 | 3 |
| 518 | Polycystin        | PKD1     | + | 14/15 | 4.88E-04 | 2 |
| 509 | Alpha-actinin 4   | ACTN4    | + | 14/15 | 4.88E-04 | 2 |

|     |                      |           |   |       |          |   |
|-----|----------------------|-----------|---|-------|----------|---|
| 511 | MFHAS1               | MFHAS1    | + | 14/15 | 4.88E-04 | 3 |
| 513 | TESC                 | TESC      | + | 14/15 | 4.88E-04 | 2 |
| 520 | CRSP8 (CRSP34)       | MED27     | + | 14/15 | 4.88E-04 | 2 |
| 523 | TRIF (TICAM1)        | TICAM1    | + | 11/11 | 4.88E-04 | 2 |
| 512 | CNOT7                | CNOT7     | - | 14/15 | 4.88E-04 | 2 |
| 519 | miR-483-3p           | MIR483    | - | 14/15 | 4.88E-04 | 2 |
| 525 | Adenosine A2b        | ADORA2B   | - | 14/15 | 4.88E-04 | 2 |
| 529 | Dopamine D1A         | DRD1      | - | 14/15 | 4.88E-04 | 3 |
| 524 | UBE3C                | UBE3C     | - | 11/11 | 4.88E-04 | 2 |
| 514 | UACA                 | UACA      | - | 14/15 | 4.88E-04 | 2 |
| 515 | CCDC6                | CCDC6     | - | 14/15 | 4.88E-04 | 3 |
| 522 | Par-4                | PAWR      | - | 14/15 | 4.88E-04 | 2 |
| 531 | Cullin 1             | CUL1      | - | 11/11 | 4.88E-04 | 2 |
| 536 | STAT1                | STAT1     | + | 28/36 | 5.97E-04 | 3 |
| 543 | TAF4B                | TAF4B     | + | 16/18 | 6.56E-04 | 2 |
| 545 | RelB (NF-kB subunit) | RELB      | + | 16/18 | 6.56E-04 | 2 |
| 538 | miR-514b-5p          | MIR514B   | + | 16/18 | 6.56E-04 | 3 |
| 541 | LINC00277            | EWSAT1    | + | 16/18 | 6.56E-04 | 3 |
| 546 | PLD2                 | PLD2      | + | 16/18 | 6.56E-04 | 3 |
| 544 | ADAM17               | ADAM17    | + | 16/18 | 6.56E-04 | 3 |
| 539 | CNOT3                | CNOT3     | + | 16/18 | 6.56E-04 | 3 |
| 542 | TRIP6                | TRIP6     | + | 16/18 | 6.56E-04 | 2 |
| 540 | miR-373-3p           | MIR373    | - | 16/18 | 6.56E-04 | 2 |
| 537 | Myosin VI            | MYO6      | - | 16/18 | 6.56E-04 | 3 |
| 552 | Zac1                 | PLAGL1    | + | 26/33 | 6.59E-04 | 3 |
| 549 | CASC9                | CASC9     | + | 26/33 | 6.59E-04 | 3 |
| 550 | IL-6 receptor        | IL6R      | + | 26/33 | 6.59E-04 | 3 |
| 551 | IL-6 receptor        | IL6ST     | + | 26/33 | 6.59E-04 | 3 |
| 547 | miR-1299             | MIR1299   | - | 26/33 | 6.59E-04 | 3 |
| 548 | miR-345-5p           | MIR345    | - | 26/33 | 6.59E-04 | 3 |
| 553 | miR-185-3p           | MIR185    | - | 24/30 | 7.16E-04 | 3 |
| 554 | Sequestosome         | SQSTM1    | - | 24/30 | 7.16E-04 | 3 |
| 556 | Syndecan-3           | SDC3      | + | 18/21 | 7.45E-04 | 3 |
| 560 | IL-2 receptor        | IL2RB     | + | 18/21 | 7.45E-04 | 3 |
| 561 | IL-2 receptor        | IL2RA     | + | 18/21 | 7.45E-04 | 3 |
| 562 | IL-2 receptor        | IL2RG     | + | 18/21 | 7.45E-04 | 3 |
| 564 | STRA6                | STRA6     | + | 18/21 | 7.45E-04 | 3 |
| 565 | PLC-gamma 1          | PLCG1     | + | 18/21 | 7.45E-04 | 3 |
| 555 | HSP70L1              | HSPA14    | + | 18/21 | 7.45E-04 | 3 |
| 557 | miR-412-5p           | MIR412    | - | 18/21 | 7.45E-04 | 3 |
| 558 | miR-539-3p           | MIR539    | - | 18/21 | 7.45E-04 | 3 |
| 559 | miR-1225-5p          | MIR1225   | - | 18/21 | 7.45E-04 | 3 |
| 563 | PTPN12               | PTPN12    | - | 18/21 | 7.45E-04 | 3 |
| 575 | SOX11                | SOX11     | + | 22/27 | 7.57E-04 | 3 |
| 580 | TWIST1               | TWIST1    | + | 22/27 | 7.57E-04 | 3 |
| 570 | HB-EGF               | HBEGF     | + | 22/27 | 7.57E-04 | 3 |
| 566 | FAM83B               | FAM83B    | + | 22/27 | 7.57E-04 | 3 |
| 567 | C6orf176             | LINC00473 | + | 22/27 | 7.57E-04 | 3 |

|     |                     |           |   |       |          |   |
|-----|---------------------|-----------|---|-------|----------|---|
| 568 | UCHL3               | UCHL3     | + | 22/27 | 7.57E-04 | 3 |
| 572 | DUB3                | USP17L2   | + | 22/27 | 7.57E-04 | 3 |
| 582 | NR1                 | GRIN1     | + | 22/27 | 7.57E-04 | 3 |
| 576 | PSTPIP2             | PSTPIP2   | + | 22/27 | 7.57E-04 | 3 |
| 578 | TRIP6               | TRIP6     | + | 22/27 | 7.57E-04 | 3 |
| 581 | IFRD1               | IFRD1     | + | 22/27 | 7.57E-04 | 3 |
| 573 | miR-3140-3p         | MIR3140   | - | 22/27 | 7.57E-04 | 3 |
| 574 | miR-1266-5p         | MIR1266   | - | 22/27 | 7.57E-04 | 3 |
| 577 | miR-496-3p          | MIR496    | - | 22/27 | 7.57E-04 | 3 |
| 579 | PIAS3               | PIAS3     | - | 22/27 | 7.57E-04 | 2 |
| 569 | VPS11               | VPS11     | - | 22/27 | 7.57E-04 | 3 |
| 571 | VPS18               | VPS18     | - | 22/27 | 7.57E-04 | 3 |
| 592 | IRF9                | IRF9      | + | 20/24 | 7.72E-04 | 3 |
| 583 | ZFPM2-AS1           | ZFPM2-AS1 | + | 20/24 | 7.72E-04 | 3 |
| 587 | miR-219-1-3p        | MIR219A1  | + | 20/24 | 7.72E-04 | 3 |
| 591 | cPKC (conventional) |           | + | 20/24 | 7.72E-04 | 3 |
| 589 | nAChR alpha-7       | CHRFAM7A  | + | 20/24 | 7.72E-04 | 3 |
| 590 | nAChR alpha-7       | CHRNA7    | + | 20/24 | 7.72E-04 | 3 |
| 586 | BRD4                | BRD4      | + | 20/24 | 7.72E-04 | 2 |
| 584 | PRMT5               | PRMT5     | + | 20/24 | 7.72E-04 | 2 |
| 588 | LRIG2               | LRIG2     | + | 20/24 | 7.72E-04 | 3 |
| 585 | miR-506-3p          | MIR506    | - | 20/24 | 7.72E-04 | 2 |
| 594 | CD36                | CD36      | + | 13/14 | 9.16E-04 | 3 |
| 596 | RhoE                | RND3      | + | 13/14 | 9.16E-04 | 2 |
| 600 | HSP60               | HSPD1     | + | 13/14 | 9.16E-04 | 2 |
| 603 | ZFP91               | ZFP91     | + | 13/14 | 9.16E-04 | 2 |
| 605 | HEY2                | HEY2      | - | 13/14 | 9.16E-04 | 3 |
| 593 | miR-26b-3p          | MIR26B    | - | 13/14 | 9.16E-04 | 2 |
| 598 | miR-146b-5p         | MIR146B   | - | 13/14 | 9.16E-04 | 2 |
| 604 | RhoB                | RHOB      | - | 13/14 | 9.16E-04 | 3 |
| 597 | PP2A cat (alpha)    | PPP2CA    | - | 13/14 | 9.16E-04 | 2 |
| 599 | PP2A cat (beta)     | PPP2CB    | - | 13/14 | 9.16E-04 | 3 |
| 602 | WIP1                | PPM1D     | - | 13/14 | 9.16E-04 | 2 |
| 601 | Cathepsin G         | CTSG      | - | 13/14 | 9.16E-04 | 3 |
| 595 | Ankyrin-B           | ANK2      | - | 13/14 | 9.16E-04 | 3 |
| 607 | Karyopherin alpha 4 | KPNA4     | + | 27/35 | 9.39E-04 | 3 |
| 606 | TORC2               | CRTC2     | + | 27/35 | 9.39E-04 | 3 |
| 608 | PIAS1               | PIAS1     | - | 27/35 | 9.39E-04 | 3 |
| 611 | BARX2               | BARX2     | + | 10/10 | 9.77E-04 | 2 |
| 612 | IRF4                | IRF4      | + | 10/10 | 9.77E-04 | 2 |
| 613 | HMGB1               | HMGB1     | + | 10/10 | 9.77E-04 | 2 |
| 614 | IFNAR2              | IFNAR2    | + | 10/10 | 9.77E-04 | 2 |
| 609 | EAP30               | SNF8      | + | 10/10 | 9.77E-04 | 2 |
| 610 | TLE4                | TLE4      | - | 10/10 | 9.77E-04 | 3 |
| 620 | RelA (p65 NF-kB)    | RELA      | + | 25/32 | 1.05E-03 | 3 |
| 621 | IL-22 receptor      | IL10RB    | + | 25/32 | 1.05E-03 | 3 |
| 622 | IL-22 receptor      | IL22RA1   | + | 25/32 | 1.05E-03 | 3 |
| 616 | CBP/P300            | EP300     | + | 25/32 | 1.05E-03 | 3 |

|     |                      |           |   |       |          |   |
|-----|----------------------|-----------|---|-------|----------|---|
| 617 | CBP/P300             | CREBBP    | + | 25/32 | 1.05E-03 | 3 |
| 615 | PTPN2                | PTPN2     | - | 25/32 | 1.05E-03 | 3 |
| 618 | RNF22                | TRIM3     | - | 25/32 | 1.05E-03 | 3 |
| 619 | SMRT                 | NCOR2     | - | 25/32 | 1.05E-03 | 3 |
| 628 | RelB (NF-kB subunit) | RELB      | + | 23/29 | 1.16E-03 | 3 |
| 623 | CaMK II gamma        | CAMK2G    | + | 23/29 | 1.16E-03 | 3 |
| 624 | ABIN-2               | TNIP2     | + | 23/29 | 1.16E-03 | 3 |
| 625 | miR-105-5p           | MIR105-1  | - | 23/29 | 1.16E-03 | 3 |
| 626 | miR-105-5p           | MIR105-2  | - | 23/29 | 1.16E-03 | 3 |
| 627 | ING4                 | ING4      | - | 23/29 | 1.16E-03 | 3 |
| 633 | miR-3941             | MIR3941   | + | 15/17 | 1.18E-03 | 3 |
| 629 | FGF9                 | FGF9      | + | 15/17 | 1.18E-03 | 3 |
| 634 | FGF17                | FGF17     | + | 15/17 | 1.18E-03 | 3 |
| 635 | FGF2                 | FGF2      | + | 15/17 | 1.18E-03 | 3 |
| 638 | FGF8                 | FGF8      | + | 15/17 | 1.18E-03 | 3 |
| 632 | Syndecan-1           | SDC1      | + | 15/17 | 1.18E-03 | 3 |
| 637 | Nectin-1             | NECTIN1   | + | 15/17 | 1.18E-03 | 3 |
| 630 | PCBP-2               | PCBP2     | + | 15/17 | 1.18E-03 | 2 |
| 631 | Klotho beta          | KLB       | + | 15/17 | 1.18E-03 | 3 |
| 636 | PPAR-gamma           | PPARG     | - | 15/17 | 1.18E-03 | 2 |
| 657 | JunD                 | JUND      | + | 21/26 | 1.25E-03 | 3 |
| 644 | FEZF1-AS1            | FEZF1-AS1 | + | 21/26 | 1.25E-03 | 3 |
| 646 | KIAA1429             | VIRMA     | + | 21/26 | 1.25E-03 | 3 |
| 656 | USP46                | USP46     | + | 21/26 | 1.25E-03 | 3 |
| 639 | DDX1                 | DDX1      | + | 21/26 | 1.25E-03 | 3 |
| 647 | RIG-I                | DDX58     | + | 21/26 | 1.25E-03 | 3 |
| 640 | DND1                 | DND1      | + | 21/26 | 1.25E-03 | 3 |
| 643 | RAD1                 | RAD1      | + | 21/26 | 1.25E-03 | 3 |
| 645 | hnRNP F              | HNRNPF    | + | 21/26 | 1.25E-03 | 3 |
| 650 | SNX8                 | SNX8      | + | 21/26 | 1.25E-03 | 3 |
| 654 | Calnexin             | CANX      | + | 21/26 | 1.25E-03 | 3 |
| 655 | LAGY                 | HOPX      | + | 21/26 | 1.25E-03 | 3 |
| 641 | miR-520e-3p          | MIR520E   | - | 21/26 | 1.25E-03 | 3 |
| 653 | miR-517c-3p          | MIR517C   | - | 21/26 | 1.25E-03 | 3 |
| 651 | CMIP                 | CMIP      | - | 21/26 | 1.25E-03 | 3 |
| 642 | PDCD10               | PDCD10    | - | 21/26 | 1.25E-03 | 3 |
| 648 | BTG3                 | BTG3      | - | 21/26 | 1.25E-03 | 3 |
| 649 | SOCS5                | SOCS5     | - | 21/26 | 1.25E-03 | 3 |
| 652 | NFKBIB               | NFKBIB    | - | 21/26 | 1.25E-03 | 3 |
| 666 | IL-9 receptor        | IL2RG     | + | 17/20 | 1.29E-03 | 3 |
| 667 | IL-9 receptor        | IL9R      | + | 17/20 | 1.29E-03 | 3 |
| 670 | IL-2R gamma chain    | IL2RG     | + | 17/20 | 1.29E-03 | 3 |
| 665 | RHEB2                | RHEB      | + | 17/20 | 1.29E-03 | 3 |
| 660 | C6orf106             | ILRUN     | + | 17/20 | 1.29E-03 | 3 |
| 661 | TSP50                | PRSS50    | + | 17/20 | 1.29E-03 | 3 |
| 662 | USP1                 | USP1      | + | 17/20 | 1.29E-03 | 2 |
| 669 | Cyclophilin A        | PPIA      | + | 17/20 | 1.29E-03 | 2 |
| 668 | Aif                  | AIFM1     | + | 17/20 | 1.29E-03 | 3 |



|     |                     |           |   |       |          |   |
|-----|---------------------|-----------|---|-------|----------|---|
| 663 | miR-302a-3p         | MIR302A   | - | 17/20 | 1.29E-03 | 2 |
| 664 | miR-23a-3p          | MIR23A    | - | 17/20 | 1.29E-03 | 2 |
| 659 | PP2A cat (alpha)    | PPP2CA    | - | 17/20 | 1.29E-03 | 3 |
| 658 | LRG-47              | IRGM      | - | 17/20 | 1.29E-03 | 3 |
| 671 | TXNIP (VDUP1)       | TXNIP     | - | 17/20 | 1.29E-03 | 2 |
| 686 | ATF-7               | ATF7      | + | 19/23 | 1.30E-03 | 3 |
| 677 | Betacellulin        | BTC       | + | 19/23 | 1.30E-03 | 3 |
| 682 | Neuregulin 2        | NRG2      | + | 19/23 | 1.30E-03 | 3 |
| 688 | Epiregulin          | EREG      | + | 19/23 | 1.30E-03 | 3 |
| 672 | Dystroglycan        | DAG1      | + | 19/23 | 1.30E-03 | 3 |
| 679 | PAK                 |           | + | 19/23 | 1.30E-03 | 3 |
| 680 | BRSK2               | BRSK2     | + | 19/23 | 1.30E-03 | 3 |
| 687 | GOLPH2              | GOLM1     | + | 19/23 | 1.30E-03 | 3 |
| 674 | MAML2               | MAML2     | + | 19/23 | 1.30E-03 | 3 |
| 684 | MAP1                | MOAP1     | + | 19/23 | 1.30E-03 | 3 |
| 673 | miR-660-5p          | MIR660    | - | 19/23 | 1.30E-03 | 3 |
| 675 | miR-199a-5p         | MIR199A1  | - | 19/23 | 1.30E-03 | 2 |
| 676 | miR-199a-5p         | MIR199A2  | - | 19/23 | 1.30E-03 | 2 |
| 678 | miR-641             | MIR641    | - | 19/23 | 1.30E-03 | 3 |
| 681 | PSMD10 (Gankyrin)   | PSMD10    | - | 19/23 | 1.30E-03 | 2 |
| 683 | IRS-2               | IRS2      | - | 19/23 | 1.30E-03 | 3 |
| 685 | Keratin 18          | KRT18     | - | 19/23 | 1.30E-03 | 3 |
| 689 | Karyopherin alpha 2 | KPNA2     | + | 26/34 | 1.47E-03 | 3 |
| 691 | p90RSK1             | RPS6KA1   | + | 24/31 | 1.66E-03 | 3 |
| 690 | PSMC3               | PSMC3     | + | 24/31 | 1.66E-03 | 3 |
| 694 | miR-200b-5p         | MIR200B   | + | 12/13 | 1.71E-03 | 3 |
| 695 | LTBR(TNFRSF3)       | LTBR      | + | 12/13 | 1.71E-03 | 3 |
| 693 | BRD3                | BRD3      | + | 12/13 | 1.71E-03 | 2 |
| 692 | CRIP2               | CRIP2     | - | 12/13 | 1.71E-03 | 2 |
| 700 | KLF6                | KLF6      | + | 22/28 | 1.86E-03 | 3 |
| 705 | TBP                 | TBP       | + | 22/28 | 1.86E-03 | 3 |
| 703 | IFN-gamma receptor  | IFNGR1    | + | 22/28 | 1.86E-03 | 3 |
| 704 | IFN-gamma receptor  | IFNGR2    | + | 22/28 | 1.86E-03 | 3 |
| 706 | alpha-5/beta-1      | ITGB1     | + | 22/28 | 1.86E-03 | 3 |
| 707 | alpha-5/beta-1      | ITGA5     | + | 22/28 | 1.86E-03 | 3 |
| 698 | SAD1 (USP39)        | USP39     | + | 22/28 | 1.86E-03 | 3 |
| 701 | MUC1-CT             | MUC1      | + | 22/28 | 1.86E-03 | 3 |
| 696 | miR-190-5p          | MIR190A   | - | 22/28 | 1.86E-03 | 3 |
| 697 | miR-1248            | MIR1248   | - | 22/28 | 1.86E-03 | 3 |
| 699 | miR-655-3p          | MIR655    | - | 22/28 | 1.86E-03 | 3 |
| 702 | miR-29b-1-5p        | MIR29B1   | - | 22/28 | 1.86E-03 | 3 |
| 708 | Karyopherin alpha 3 | KPNA3     | + | 9/9   | 1.95E-03 | 2 |
| 712 | ENL                 | MLLT1     | + | 9/9   | 1.95E-03 | 3 |
| 718 | NF-AT4(NFATC3)      | NFATC3    | + | 9/9   | 1.95E-03 | 2 |
| 719 | IRF3                | IRF3      | + | 9/9   | 1.95E-03 | 1 |
| 720 | c-Rel (NF-kB)       | REL       | + | 9/9   | 1.95E-03 | 2 |
| 714 | LINC02605           | LINC02605 | + | 9/9   | 1.95E-03 | 2 |
| 709 | SND1                | SND1      | + | 9/9   | 1.95E-03 | 2 |

|     |                  |           |   |       |          |   |
|-----|------------------|-----------|---|-------|----------|---|
| 716 | EPC1             | EPC1      | + | 9/9   | 1.95E-03 | 2 |
| 710 | miR-302d-3p      | MIR302D   | - | 9/9   | 1.95E-03 | 2 |
| 717 | miR-541-3p       | MIR541    | - | 9/9   | 1.95E-03 | 2 |
| 711 | QKI              | QKI       | - | 9/9   | 1.95E-03 | 2 |
| 713 | TRIM33           | TRIM33    | - | 9/9   | 1.95E-03 | 2 |
| 715 | Ubiquilin-1      | UBQLN1    | - | 9/9   | 1.95E-03 | 3 |
| 734 | SOX10            | SOX10     | + | 20/25 | 2.04E-03 | 3 |
| 735 | BAPX1            | NKX3-2    | + | 20/25 | 2.04E-03 | 3 |
| 736 | RelA (p65 NF-kB) | RELA      | + | 20/25 | 2.04E-03 | 2 |
| 722 | LINC00662        | LINC00662 | + | 20/25 | 2.04E-03 | 3 |
| 728 | FGF1             | FGF1      | + | 20/25 | 2.04E-03 | 3 |
| 731 | Syk              | SYK       | + | 20/25 | 2.04E-03 | 3 |
| 730 | Rad52            | RAD52     | + | 20/25 | 2.04E-03 | 3 |
| 732 | SH2B             | SH2B1     | + | 20/25 | 2.04E-03 | 3 |
| 726 | TAFII55          | TAF7      | - | 20/25 | 2.04E-03 | 3 |
| 721 | miR-4698         | MIR4698   | - | 20/25 | 2.04E-03 | 3 |
| 723 | miR-1323         | MIR1323   | - | 20/25 | 2.04E-03 | 3 |
| 724 | miR-29c-5p       | MIR29C    | - | 20/25 | 2.04E-03 | 3 |
| 727 | miR-27a-5p       | MIR27A    | - | 20/25 | 2.04E-03 | 3 |
| 729 | FasR(CD95)       | FAS       | - | 20/25 | 2.04E-03 | 3 |
| 733 | PIAS1            | PIAS1     | - | 20/25 | 2.04E-03 | 2 |
| 725 | LIG-1            | LRIG1     | - | 20/25 | 2.04E-03 | 3 |
| 737 | SMARCA5          | SMARCA5   | + | 14/16 | 2.09E-03 | 3 |
| 754 | TFIIB            | GTF2B     | + | 14/16 | 2.09E-03 | 2 |
| 748 | EYA4             | EYA4      | + | 14/16 | 2.09E-03 | 3 |
| 751 | PKA-cat beta     | PRKACB    | + | 14/16 | 2.09E-03 | 2 |
| 753 | Fyn              | FYN       | + | 14/16 | 2.09E-03 | 2 |
| 745 | OR3A4            | OR3A4P    | + | 14/16 | 2.09E-03 | 3 |
| 741 | NOTCH2 (2ICD)    | NOTCH2    | + | 14/16 | 2.09E-03 | 2 |
| 742 | CPSF4            | CPSF4     | + | 14/16 | 2.09E-03 | 2 |
| 743 | IRAK1BP1         | IRAK1BP1  | + | 14/16 | 2.09E-03 | 2 |
| 746 | CCM2             | CCM2      | + | 14/16 | 2.09E-03 | 3 |
| 750 | PHF20            | PHF20     | + | 14/16 | 2.09E-03 | 2 |
| 738 | miR-520e-3p      | MIR520E   | - | 14/16 | 2.09E-03 | 2 |
| 744 | miR-875-3p       | MIR875    | - | 14/16 | 2.09E-03 | 3 |
| 749 | miR-372-3p       | MIR372    | - | 14/16 | 2.09E-03 | 2 |
| 752 | miR-148a-3p      | MIR148A   | - | 14/16 | 2.09E-03 | 2 |
| 747 | PPP2R2B          | PPP2R2B   | - | 14/16 | 2.09E-03 | 3 |
| 739 | Lysyl oxidase    | LOX       | - | 14/16 | 2.09E-03 | 3 |
| 740 | CHFR             | CHFR      | - | 14/16 | 2.09E-03 | 2 |
| 757 | NF-kB1 (p50)     | NFKB1     | + | 18/22 | 2.17E-03 | 2 |
| 762 | AKT1             | AKT1      | + | 18/22 | 2.17E-03 | 2 |
| 763 | IKK-beta         | IKKBK     | + | 18/22 | 2.17E-03 | 2 |
| 759 | WHSC1            | NSD2      | + | 18/22 | 2.17E-03 | 2 |
| 755 | MCA2(p38)        | AIMP2     | + | 18/22 | 2.17E-03 | 3 |
| 758 | STING (TMEM173)  | STING1    | + | 18/22 | 2.17E-03 | 3 |
| 756 | miR-564          | MIR564    | - | 18/22 | 2.17E-03 | 3 |
| 760 | YTHDF2           | YTHDF2    | - | 18/22 | 2.17E-03 | 2 |

|     |                 |           |   |       |          |   |
|-----|-----------------|-----------|---|-------|----------|---|
| 761 | GBP1            | GBP1      | - | 18/22 | 2.17E-03 | 3 |
| 765 | miR-210-5p      | MIR210    | + | 16/19 | 2.21E-03 | 3 |
| 772 | miR-1261        | MIR1261   | + | 16/19 | 2.21E-03 | 3 |
| 774 | DOCK8           | DOCK8     | + | 16/19 | 2.21E-03 | 3 |
| 764 | Rab-1A          | RAB1A     | + | 16/19 | 2.21E-03 | 3 |
| 768 | AZI2            | AZI2      | + | 16/19 | 2.21E-03 | 3 |
| 767 | DEP-1           | PTPRJ     | + | 16/19 | 2.21E-03 | 3 |
| 773 | LARS1           | LARS1     | + | 16/19 | 2.21E-03 | 3 |
| 766 | OTUD4           | OTUD4     | + | 16/19 | 2.21E-03 | 3 |
| 769 | RGC32           | RGCC      | + | 16/19 | 2.21E-03 | 2 |
| 770 | Flotillin-2     | FLOT2     | + | 16/19 | 2.21E-03 | 3 |
| 771 | P52rIPK         | THAP12    | + | 16/19 | 2.21E-03 | 3 |
| 775 | Nod2 (CARD15)   | NOD2      | + | 16/19 | 2.21E-03 | 3 |
| 776 | SPRY4-IT1       | SPRY4-IT1 | + | 25/33 | 2.28E-03 | 3 |
| 777 | FGFR3           | FGFR3     | + | 25/33 | 2.28E-03 | 3 |
| 783 | Ran             | RAN       | + | 23/30 | 2.61E-03 | 3 |
| 781 | PKA-cat beta    | PRKACB    | + | 23/30 | 2.61E-03 | 3 |
| 784 | WDR5            | WDR5      | + | 23/30 | 2.61E-03 | 3 |
| 780 | Polycystin      | PKD1      | + | 23/30 | 2.61E-03 | 3 |
| 782 | Pyrin (MEFV)    | MEFV      | + | 23/30 | 2.61E-03 | 3 |
| 778 | miR-493-5p      | MIR493    | - | 23/30 | 2.61E-03 | 3 |
| 779 | miR-302a-3p     | MIR302A   | - | 23/30 | 2.61E-03 | 3 |
| 795 | NFAT-90         | ILF3      | + | 21/27 | 2.96E-03 | 3 |
| 798 | TFIIB           | GTF2B     | + | 21/27 | 2.96E-03 | 3 |
| 787 | miR-3134        | MIR3134   | + | 21/27 | 2.96E-03 | 3 |
| 807 | TNF-alpha       | TNF       | + | 21/27 | 2.96E-03 | 3 |
| 799 | alpha-3/beta-1  | ITGB1     | + | 21/27 | 2.96E-03 | 3 |
| 800 | alpha-3/beta-1  | ITGA3     | + | 21/27 | 2.96E-03 | 3 |
| 801 | alpha-8/beta-1  | ITGA8     | + | 21/27 | 2.96E-03 | 3 |
| 802 | alpha-8/beta-1  | ITGB1     | + | 21/27 | 2.96E-03 | 3 |
| 803 | alpha-10/beta-1 | ITGB1     | + | 21/27 | 2.96E-03 | 3 |
| 804 | alpha-10/beta-1 | ITGA10    | + | 21/27 | 2.96E-03 | 3 |
| 805 | alpha-11/beta-1 | ITGA11    | + | 21/27 | 2.96E-03 | 3 |
| 806 | alpha-11/beta-1 | ITGB1     | + | 21/27 | 2.96E-03 | 3 |
| 797 | PAK1            | PAK1      | + | 21/27 | 2.96E-03 | 3 |
| 785 | Protein p8      | NUPR1     | + | 21/27 | 2.96E-03 | 3 |
| 788 | IRAK1BP1        | IRAK1BP1  | + | 21/27 | 2.96E-03 | 3 |
| 790 | VISA            | MAVS      | + | 21/27 | 2.96E-03 | 3 |
| 789 | PL scramblase 1 | PLSCR1    | - | 21/27 | 2.96E-03 | 3 |
| 791 | FOXP3           | FOXP3     | - | 21/27 | 2.96E-03 | 3 |
| 794 | PAX6            | PAX6      | - | 21/27 | 2.96E-03 | 3 |
| 796 | RRAD            | RRAD      | - | 21/27 | 2.96E-03 | 3 |
| 792 | KDM2A           | KDM2A     | - | 21/27 | 2.96E-03 | 3 |
| 793 | ALKBH5          | ALKBH5    | - | 21/27 | 2.96E-03 | 3 |
| 786 | GNIP (TRIM7)    | TRIM7     | - | 21/27 | 2.96E-03 | 3 |
| 808 | IEX1            | IER3      | - | 21/27 | 2.96E-03 | 3 |
| 810 | MIR31HG         | MIR31HG   | + | 26/35 | 2.99E-03 | 3 |
| 809 | METTTL3         | METTTL3   | + | 26/35 | 2.99E-03 | 3 |

|     |                     |          |   |       |          |   |
|-----|---------------------|----------|---|-------|----------|---|
| 811 | PSMD10 (Gankyrin)   | PSMD10   | - | 26/35 | 2.99E-03 | 3 |
| 814 | MKL1                | MRTFA    | + | 11/12 | 3.17E-03 | 2 |
| 815 | DAPK1               | DAPK1    | + | 11/12 | 3.17E-03 | 2 |
| 812 | PAX7                | PAX7     | - | 11/12 | 3.17E-03 | 2 |
| 813 | miR-141-5p          | MIR141   | - | 11/12 | 3.17E-03 | 3 |
| 817 | Karyopherin alpha 4 | KPNA4    | + | 19/24 | 3.31E-03 | 2 |
| 818 | miR-605-5p          | MIR605   | + | 19/24 | 3.31E-03 | 3 |
| 820 | APP                 | APP      | + | 19/24 | 3.31E-03 | 3 |
| 816 | CaMKK1              | CAMKK1   | + | 19/24 | 3.31E-03 | 3 |
| 821 | WT1                 | WT1      | - | 19/24 | 3.31E-03 | 3 |
| 819 | miR-96-3p           | MIR96    | - | 19/24 | 3.31E-03 | 3 |
| 824 | YTHDF1              | YTHDF1   | + | 24/32 | 3.50E-03 | 3 |
| 822 | HBXAP               | RSF1     | + | 24/32 | 3.50E-03 | 3 |
| 823 | RBM35A              | ESRP1    | - | 24/32 | 3.50E-03 | 3 |
| 832 | LOC101929517        | ETS1-AS1 | + | 17/21 | 3.60E-03 | 3 |
| 837 | Ephrin-B receptor 1 | EPHB1    | + | 17/21 | 3.60E-03 | 3 |
| 834 | MIF                 | MIF      | + | 17/21 | 3.60E-03 | 2 |
| 836 | PDGF-B              | PDGFB    | + | 17/21 | 3.60E-03 | 3 |
| 827 | WRCH-1              | RHOA     | + | 17/21 | 3.60E-03 | 3 |
| 830 | STRAD               | STRADA   | + | 17/21 | 3.60E-03 | 3 |
| 835 | SAM68               | KHDRBS1  | + | 17/21 | 3.60E-03 | 2 |
| 828 | DSIPI (GILZ)        | TSC22D3  | - | 17/21 | 3.60E-03 | 2 |
| 826 | miR-4728-5p         | MIR4728  | - | 17/21 | 3.60E-03 | 3 |
| 833 | miR-615-5p          | MIR615   | - | 17/21 | 3.60E-03 | 3 |
| 829 | LGR4                | LGR4     | - | 17/21 | 3.60E-03 | 3 |
| 831 | DDX19L              | DDX19A   | - | 17/21 | 3.60E-03 | 3 |
| 825 | RAI                 | RNH1     | - | 17/21 | 3.60E-03 | 3 |
| 841 | Importin 9          | IPO9     | + | 13/15 | 3.69E-03 | 3 |
| 838 | ELF3                | ELF3     | + | 13/15 | 3.69E-03 | 2 |
| 844 | UFO                 | AXL      | + | 13/15 | 3.69E-03 | 3 |
| 845 | HPK1(MAP4K1)        | MAP4K1   | + | 13/15 | 3.69E-03 | 3 |
| 839 | PGAM1               | PGAM1    | + | 13/15 | 3.69E-03 | 3 |
| 847 | CNR1                | CNR1     | + | 13/15 | 3.69E-03 | 3 |
| 846 | RACK1               | RACK1    | + | 13/15 | 3.69E-03 | 2 |
| 842 | NRIF                | ZNF274   | - | 13/15 | 3.69E-03 | 3 |
| 840 | miR-520c-5p         | MIR520C  | - | 13/15 | 3.69E-03 | 2 |
| 843 | NRBP                | NRBP1    | - | 13/15 | 3.69E-03 | 3 |
| 855 | NF-AT5              | NFAT5    | + | 15/18 | 3.77E-03 | 2 |
| 856 | NF-AT2(NFATC1)      | NFATC1   | + | 15/18 | 3.77E-03 | 2 |
| 854 | mTOR                | MTOR     | + | 15/18 | 3.77E-03 | 2 |
| 849 | ART-27              | UXT      | + | 15/18 | 3.77E-03 | 2 |
| 850 | TIRAP (Mal)         | TIRAP    | + | 15/18 | 3.77E-03 | 3 |
| 851 | LARP1               | LARP1    | + | 15/18 | 3.77E-03 | 3 |
| 852 | miR-186-5p          | MIR186   | - | 15/18 | 3.77E-03 | 2 |
| 853 | Dexas1              | RASD1    | - | 15/18 | 3.77E-03 | 3 |
| 857 | Sortilin            | SORT1    | - | 15/18 | 3.77E-03 | 3 |
| 848 | Annexin V           | ANXA5    | - | 15/18 | 3.77E-03 | 3 |
| 858 | IRAK1               | IRAK1    | + | 27/37 | 3.82E-03 | 3 |

|     |                     |           |   |       |          |   |
|-----|---------------------|-----------|---|-------|----------|---|
| 862 | ATF-5               | ATF5      | + | 8/8   | 3.91E-03 | 2 |
| 864 | STAT2               | STAT2     | + | 8/8   | 3.91E-03 | 1 |
| 859 | MEG3                | MEG3      | - | 8/8   | 3.91E-03 | 2 |
| 863 | miR-328-3p          | MIR328    | - | 8/8   | 3.91E-03 | 2 |
| 860 | DACT1               | DACT1     | - | 8/8   | 3.91E-03 | 2 |
| 861 | EID1                | EID1      | - | 8/8   | 3.91E-03 | 2 |
| 868 | LINC01138           | LINC01138 | + | 22/29 | 4.07E-03 | 3 |
| 870 | JNK3(MAPK10)        | MAPK10    | + | 22/29 | 4.07E-03 | 3 |
| 866 | BRD4                | BRD4      | + | 22/29 | 4.07E-03 | 3 |
| 867 | KLF11 (TIEG2)       | KLF11     | - | 22/29 | 4.07E-03 | 3 |
| 865 | miR-490-5p          | MIR490    | - | 22/29 | 4.07E-03 | 3 |
| 869 | DCTN2               | DCTN2     | - | 22/29 | 4.07E-03 | 3 |
| 871 | MYST1               | KAT8      | + | 25/34 | 4.52E-03 | 3 |
| 872 | XAF1                | XAF1      | + | 25/34 | 4.52E-03 | 3 |
| 876 | NRB54               | NONO      | + | 20/26 | 4.68E-03 | 3 |
| 881 | STAT1               | STAT1     | + | 20/26 | 4.68E-03 | 2 |
| 884 | MEF2C               | MEF2C     | + | 20/26 | 4.68E-03 | 3 |
| 875 | Ephrin-A receptor 4 | EPHA4     | + | 20/26 | 4.68E-03 | 3 |
| 885 | LPAR2               | LPAR2     | + | 20/26 | 4.68E-03 | 3 |
| 886 | AGTR1               | AGTR1     | + | 20/26 | 4.68E-03 | 3 |
| 873 | NOTCH2 (2ICD)       | NOTCH2    | + | 20/26 | 4.68E-03 | 3 |
| 880 | eIF3S5              | EIF3F     | + | 20/26 | 4.68E-03 | 3 |
| 874 | CNOT7               | CNOT7     | - | 20/26 | 4.68E-03 | 3 |
| 883 | NRF2                | NFE2L2    | - | 20/26 | 4.68E-03 | 3 |
| 877 | miR-320d            | MIR320D1  | - | 20/26 | 4.68E-03 | 3 |
| 878 | miR-320d            | MIR320D2  | - | 20/26 | 4.68E-03 | 3 |
| 879 | Casein kinase I     | CSNK1G1   | - | 20/26 | 4.68E-03 | 3 |
| 882 | CDC20               | CDC20     | - | 20/26 | 4.68E-03 | 3 |
| 895 | TLR2                | TLR2      | + | 18/23 | 5.31E-03 | 3 |
| 889 | MYST1               | KAT8      | + | 18/23 | 5.31E-03 | 2 |
| 887 | ASXL1               | ASXL1     | + | 18/23 | 5.31E-03 | 3 |
| 888 | RNF144              | RNF144A   | + | 18/23 | 5.31E-03 | 3 |
| 891 | NET1(TSPAN1)        | TSPAN1    | + | 18/23 | 5.31E-03 | 3 |
| 892 | TRAM                | TICAM2    | + | 18/23 | 5.31E-03 | 3 |
| 893 | MCT-1               | MCTS1     | + | 18/23 | 5.31E-03 | 3 |
| 890 | SHIP                | INPP5D    | - | 18/23 | 5.31E-03 | 3 |
| 894 | FKBP8               | FKBP8     | - | 18/23 | 5.31E-03 | 3 |
| 896 | JAK1                | JAK1      | + | 23/31 | 5.34E-03 | 3 |
| 897 | PCNA                | PCNA      | - | 23/31 | 5.34E-03 | 3 |
| 898 | IKK-beta            | IKKBK     | + | 26/36 | 5.67E-03 | 3 |
| 902 | IRF7                | IRF7      | + | 10/11 | 5.86E-03 | 3 |
| 904 | Nod1                | NOD1      | + | 10/11 | 5.86E-03 | 3 |
| 905 | TLR4                | TLR4      | + | 10/11 | 5.86E-03 | 2 |
| 900 | STK36               | STK36     | + | 10/11 | 5.86E-03 | 3 |
| 901 | ULK3                | ULK3      | + | 10/11 | 5.86E-03 | 3 |
| 899 | DRIP130             | MED23     | + | 10/11 | 5.86E-03 | 2 |
| 903 | RASA3               | RASA3     | - | 10/11 | 5.86E-03 | 3 |
| 911 | NRB54               | NONO      | + | 16/20 | 5.91E-03 | 2 |

|     |                    |           |   |       |          |   |
|-----|--------------------|-----------|---|-------|----------|---|
| 906 | miR-330-3p         | MIR330    | + | 16/20 | 5.91E-03 | 3 |
| 907 | DR6(TNFRSF21)      | TNFRSF21  | + | 16/20 | 5.91E-03 | 3 |
| 916 | iNOS               | NOS2      | + | 16/20 | 5.91E-03 | 3 |
| 908 | DLEU1              | DLEU1     | + | 16/20 | 5.91E-03 | 3 |
| 910 | C1orf86            | FAAP20    | + | 16/20 | 5.91E-03 | 3 |
| 912 | BUB3               | BUB3      | + | 16/20 | 5.91E-03 | 3 |
| 913 | miR-4288           | MIR4288   | - | 16/20 | 5.91E-03 | 3 |
| 914 | TRAF7              | TRAF7     | - | 16/20 | 5.91E-03 | 2 |
| 915 | Elongin C          | ELOC      | - | 16/20 | 5.91E-03 | 3 |
| 909 | NALP4              | NLRP4     | - | 16/20 | 5.91E-03 | 3 |
| 917 | Alpha crystallin B | CRYAB     | - | 16/20 | 5.91E-03 | 2 |
| 918 | SOCS1              | SOCS1     | - | 16/20 | 5.91E-03 | 2 |
| 926 | GATA-4             | GATA4     | + | 21/28 | 6.27E-03 | 3 |
| 927 | NF-AT5             | NFAT5     | + | 21/28 | 6.27E-03 | 3 |
| 924 | IKK (cat)          | IKKBK     | + | 21/28 | 6.27E-03 | 3 |
| 925 | IKK (cat)          | CHUK      | + | 21/28 | 6.27E-03 | 3 |
| 921 | BVRA               | BLVRA     | + | 21/28 | 6.27E-03 | 3 |
| 922 | RPS3               | RPS3      | + | 21/28 | 6.27E-03 | 3 |
| 923 | TPT1               | TPT1      | + | 21/28 | 6.27E-03 | 3 |
| 919 | miR-935            | MIR935    | - | 21/28 | 6.27E-03 | 3 |
| 920 | PICT-1             | NOP53     | - | 21/28 | 6.27E-03 | 3 |
| 928 | IGBP1              | IGBP1     | - | 21/28 | 6.27E-03 | 3 |
| 937 | IRF4               | IRF4      | + | 14/17 | 6.36E-03 | 3 |
| 934 | LIFR               | LIFR      | + | 14/17 | 6.36E-03 | 3 |
| 938 | G-protein          |           | + | 14/17 | 6.36E-03 | 3 |
| 930 | PRMT6              | PRMT6     | + | 14/17 | 6.36E-03 | 2 |
| 936 | ARD1               | NAA10     | + | 14/17 | 6.36E-03 | 2 |
| 929 | NF-kB1 (p105)      | NFKB1     | - | 14/17 | 6.36E-03 | 2 |
| 935 | KLF11 (TIEG2)      | KLF11     | - | 14/17 | 6.36E-03 | 2 |
| 931 | miR-99a-3p         | MIR99A    | - | 14/17 | 6.36E-03 | 3 |
| 933 | hsa-miR-4756-5p    | MIR4756   | - | 14/17 | 6.36E-03 | 3 |
| 939 | CD45               | PTPRC     | - | 14/17 | 6.36E-03 | 3 |
| 932 | TRIM72             | TRIM72    | - | 14/17 | 6.36E-03 | 3 |
| 942 | MCM5               | MCM5      | + | 12/14 | 6.47E-03 | 2 |
| 944 | HBXAP              | RSF1      | + | 12/14 | 6.47E-03 | 2 |
| 945 | TIF1-beta          | TRIM28    | - | 12/14 | 6.47E-03 | 2 |
| 943 | miR-192-3p         | MIR192    | - | 12/14 | 6.47E-03 | 3 |
| 946 | miR-302d-5p        | MIR302D   | - | 12/14 | 6.47E-03 | 3 |
| 947 | Caspase-3          | CASP3     | - | 12/14 | 6.47E-03 | 2 |
| 940 | HSPA1B             | HSPA1A    | - | 12/14 | 6.47E-03 | 2 |
| 941 | HSPA1B             | HSPA1B    | - | 12/14 | 6.47E-03 | 2 |
| 948 | SMYD3              | SMYD3     | + | 24/33 | 6.77E-03 | 3 |
| 949 | DAXX               | DAXX      | - | 24/33 | 6.77E-03 | 3 |
| 955 | NOTCH1 (NICD)      | NOTCH1    | + | 19/25 | 7.32E-03 | 2 |
| 953 | SPRED2             | SPRED2    | + | 19/25 | 7.32E-03 | 3 |
| 957 | Cyclin E           | CCNE1     | + | 19/25 | 7.32E-03 | 3 |
| 950 | miR-1285-3p        | MIR1285-2 | - | 19/25 | 7.32E-03 | 3 |
| 951 | miR-1285-3p        | MIR1285-1 | - | 19/25 | 7.32E-03 | 3 |

|      |               |           |   |       |          |   |
|------|---------------|-----------|---|-------|----------|---|
| 952  | miR-582-5p    | MIR582    | - | 19/25 | 7.32E-03 | 3 |
| 954  | miR-182-5p    | MIR182    | - | 19/25 | 7.32E-03 | 2 |
| 956  | miR-454-3p    | MIR454    | - | 19/25 | 7.32E-03 | 3 |
| 960  | NF-kB p65/p65 | RELA      | + | 7/7   | 7.81E-03 | 2 |
| 962  | NF-kB p50/p65 | RELA      | + | 7/7   | 7.81E-03 | 2 |
| 963  | NF-kB p50/p65 | NFKB1     | + | 7/7   | 7.81E-03 | 2 |
| 965  | p300          | EP300     | + | 7/7   | 7.81E-03 | 1 |
| 964  | MyD88         | MYD88     | + | 7/7   | 7.81E-03 | 2 |
| 966  | PEG3          | PEG3      | - | 7/7   | 7.81E-03 | 2 |
| 961  | miR-766-5p    | MIR766    | - | 7/7   | 7.81E-03 | 2 |
| 958  | CORO1B        | CORO1B    | - | 7/7   | 7.81E-03 | 3 |
| 959  | TRIM35        | TRIM35    | - | 7/7   | 7.81E-03 | 2 |
| 967  | Myocardin     | MYOCD     | + | 22/30 | 8.06E-03 | 3 |
| 970  | MIF           | MIF       | + | 22/30 | 8.06E-03 | 3 |
| 968  | Pim-2         | PIM2      | + | 22/30 | 8.06E-03 | 3 |
| 969  | miR-let-7g-3p | MIRLET7G  | - | 22/30 | 8.06E-03 | 3 |
| 971  | ISG15         | ISG15     | + | 25/35 | 8.34E-03 | 3 |
| 990  | Fyn           | FYN       | + | 17/22 | 8.45E-03 | 3 |
| 972  | Kallikrein 6  | KLK6      | + | 17/22 | 8.45E-03 | 3 |
| 975  | RagB          | RRAGB     | + | 17/22 | 8.45E-03 | 3 |
| 978  | Mucin 13      | MUC13     | + | 17/22 | 8.45E-03 | 3 |
| 979  | Piccolo       | PCLO      | + | 17/22 | 8.45E-03 | 3 |
| 984  | RPS3          | RPS3      | + | 17/22 | 8.45E-03 | 2 |
| 988  | RagD          | RRAGD     | + | 17/22 | 8.45E-03 | 3 |
| 985  | FOXK1         | FOXK1     | - | 17/22 | 8.45E-03 | 3 |
| 992  | NUR77         | NR4A1     | - | 17/22 | 8.45E-03 | 2 |
| 976  | miR-301a-3p   | MIR301A   | - | 17/22 | 8.45E-03 | 2 |
| 980  | miR-516a-5p   | MIR516A2  | - | 17/22 | 8.45E-03 | 3 |
| 981  | miR-516a-5p   | MIR516A1  | - | 17/22 | 8.45E-03 | 3 |
| 993  | MSR1          | MSR1      | - | 17/22 | 8.45E-03 | 3 |
| 974  | DRAK1         | STK17A    | - | 17/22 | 8.45E-03 | 3 |
| 986  | USP44         | USP44     | - | 17/22 | 8.45E-03 | 3 |
| 991  | SSTR5         | SSTR5     | - | 17/22 | 8.45E-03 | 3 |
| 987  | NEUR1         | NEU1      | - | 17/22 | 8.45E-03 | 3 |
| 973  | CRIP2         | CRIP2     | - | 17/22 | 8.45E-03 | 3 |
| 977  | SIGIRR        | SIGIRR    | - | 17/22 | 8.45E-03 | 3 |
| 982  | Kendrin       | PCNT      | - | 17/22 | 8.45E-03 | 3 |
| 983  | FRS2beta      | FRS3      | - | 17/22 | 8.45E-03 | 3 |
| 989  | DCTN2         | DCTN2     | - | 17/22 | 8.45E-03 | 2 |
| 995  | CIZ1          | CIZ1      | + | 20/27 | 9.58E-03 | 3 |
| 1000 | TAF4B         | TAF4B     | + | 20/27 | 9.58E-03 | 3 |
| 998  | LINC-PINT     | LINC-PINT | + | 20/27 | 9.58E-03 | 3 |
| 994  | BS69          | ZMYND11   | + | 20/27 | 9.58E-03 | 3 |
| 1001 | Importin      |           | - | 20/27 | 9.58E-03 | 3 |
| 997  | miR-23a-3p    | MIR23A    | - | 20/27 | 9.58E-03 | 3 |
| 996  | EBBP          | TRIM16    | - | 20/27 | 9.58E-03 | 3 |
| 999  | Sestrin 2     | SESN2     | - | 20/27 | 9.58E-03 | 3 |
| 1011 | NF-kB         |           | + | 15/19 | 9.61E-03 | 3 |

|      |                  |          |   |       |          |   |
|------|------------------|----------|---|-------|----------|---|
| 1005 | SBF2-AS1         | SBF2-AS1 | + | 15/19 | 9.61E-03 | 3 |
| 1008 | RagC             | RRAGC    | + | 15/19 | 9.61E-03 | 3 |
| 1014 | PTPD1            | PTPN21   | + | 15/19 | 9.61E-03 | 3 |
| 1010 | CDK6             | CDK6     | + | 15/19 | 9.61E-03 | 2 |
| 1004 | JSAP1            | MAPK8IP3 | + | 15/19 | 9.61E-03 | 3 |
| 1009 | MILI             | PIWIL2   | + | 15/19 | 9.61E-03 | 3 |
| 1002 | PPAR-beta(delta) | PPARD    | - | 15/19 | 9.61E-03 | 2 |
| 1003 | VENTX            | VENTX    | - | 15/19 | 9.61E-03 | 3 |
| 1007 | RRAD             | RRAD     | - | 15/19 | 9.61E-03 | 2 |
| 1013 | Rab-8            | RAB8A    | - | 15/19 | 9.61E-03 | 3 |
| 1006 | RBCK1            | RBCK1    | - | 15/19 | 9.61E-03 | 2 |
| 1012 | SH3BP-2          | SH3BP2   | - | 15/19 | 9.61E-03 | 3 |



**Supplementary Table 3. All predicted causal reasoning transcription factors using DEGs that has  $\log_2FC \geq 2$  or  $\leq -2$  and  $FDR \leq 0.05$ .**

| Rank | Molecular Entity      | Gene    | Predicted Activity | Correct/Total network predictions | Activity Prediction p-value | Calculation Distance |
|------|-----------------------|---------|--------------------|-----------------------------------|-----------------------------|----------------------|
| 4    | IRF1                  | IRF1    | +                  | 60/62                             | 4.24E-16                    | 1                    |
| 52   | STAT1                 | STAT1   | +                  | 64/70                             | 1.22E-13                    | 1                    |
| 55   | IRF9                  | IRF9    | +                  | 69/77                             | 1.57E-13                    | 2                    |
| 58   | CNOT7                 | CNOT7   | -                  | 63/69                             | 2.24E-13                    | 2                    |
| 77   | IRF1                  | IRF1    | +                  | 105/132                           | 2.33E-12                    | 2                    |
| 91   | KLF5                  | KLF5    | +                  | 121/158                           | 6.49E-12                    | 2                    |
| 99   | STAT2                 | STAT2   | +                  | 97/122                            | 1.66E-11                    | 2                    |
| 129  | AF-10                 | MLLT10  | +                  | 131/178                           | 1.14E-10                    | 3                    |
| 149  | NRB54                 | NONO    | +                  | 81/101                            | 3.47E-10                    | 2                    |
| 187  | NUR77                 | NR4A1   | -                  | 198/294                           | 1.35E-09                    | 3                    |
| 194  | C/EBPbeta             | CEBPB   | +                  | 124/171                           | 1.69E-09                    | 2                    |
| 236  | c-Fos                 | FOS     | +                  | 176/260                           | 5.92E-09                    | 3                    |
| 258  | NF-AT4(NFATC3)        | NFATC3  | +                  | 111/153                           | 1.12E-08                    | 3                    |
| 266  | MECOM                 | MECOM   | -                  | 94/126                            | 1.46E-08                    | 2                    |
| 267  | STAT2                 | STAT2   | +                  | 132/188                           | 1.47E-08                    | 3                    |
| 268  | MEF2D                 | MEF2D   | +                  | 180/269                           | 1.52E-08                    | 3                    |
| 271  | KLF5                  | KLF5    | +                  | 184/276                           | 1.62E-08                    | 3                    |
| 273  | c-Fos                 | FOS     | +                  | 97/131                            | 1.66E-08                    | 2                    |
| 291  | MafK                  | MAFK    | +                  | 185/279                           | 2.74E-08                    | 3                    |
| 302  | HNF1-alpha            | HNF1A   | +                  | 114/160                           | 3.79E-08                    | 3                    |
| 334  | STAT4                 | STAT4   | +                  | 104/145                           | 8.48E-08                    | 3                    |
| 341  | FOXP3                 | FOXP3   | -                  | 100/139                           | 1.17E-07                    | 3                    |
| 342  | c-Jun                 | JUN     | +                  | 103/144                           | 1.22E-07                    | 2                    |
| 357  | NUR77                 | NR4A1   | -                  | 110/156                           | 1.58E-07                    | 2                    |
| 360  | ATF-5                 | ATF5    | +                  | 195/301                           | 1.63E-07                    | 3                    |
| 371  | CC2D1A                | CC2D1A  | +                  | 171/260                           | 2.05E-07                    | 3                    |
| 372  | NP220                 | ZNF638  | +                  | 161/243                           | 2.25E-07                    | 3                    |
| 377  | FOXP3                 | FOXP3   | -                  | 65/84                             | 2.37E-07                    | 2                    |
| 383  | IRF1                  | IRF1    | +                  | 208/325                           | 2.53E-07                    | 3                    |
| 404  | GFI-1                 | GFI1    | -                  | 94/131                            | 3.36E-07                    | 2                    |
| 409  | Neurogenin 3          | NEUROG3 | +                  | 193/300                           | 3.91E-07                    | 3                    |
| 414  | TBP                   | TBP     | +                  | 116/168                           | 4.37E-07                    | 3                    |
| 425  | C/EBPbeta             | CEBPB   | +                  | 177/273                           | 5.41E-07                    | 3                    |
| 427  | Esrra                 | ESRRA   | -                  | 75/101                            | 5.58E-07                    | 3                    |
| 428  | KLF6                  | KLF6    | +                  | 63/82                             | 5.73E-07                    | 2                    |
| 430  | cKrox                 | ZBTB7B  | +                  | 94/132                            | 5.93E-07                    | 3                    |
| 431  | HES6                  | HES6    | +                  | 178/275                           | 5.94E-07                    | 3                    |
| 433  | JunD                  | JUND    | +                  | 97/137                            | 6.10E-07                    | 3                    |
| 447  | MEF2A                 | MEF2A   | +                  | 192/300                           | 7.10E-07                    | 3                    |
| 463  | MafK                  | MAFK    | +                  | 62/81                             | 8.87E-07                    | 2                    |
| 464  | c-Rel (NF-kB subunit) | REL     | +                  | 39/46                             | 9.16E-07                    | 2                    |
| 466  | cKrox                 | ZBTB7B  | +                  | 60/78                             | 9.87E-07                    | 2                    |

|     |                       |         |   |         |          |   |
|-----|-----------------------|---------|---|---------|----------|---|
| 475 | SIX1                  | SIX1    | + | 162/249 | 1.16E-06 | 3 |
| 491 | Fra-1                 | FOSL1   | + | 66/88   | 1.44E-06 | 3 |
| 492 | RelA (p65 NF-kB       | RELA    | + | 93/132  | 1.46E-06 | 2 |
| 494 | STAT2                 | STAT2   | + | 23/24   | 1.49E-06 | 1 |
| 512 | MECOM                 | MECOM   | - | 198/314 | 2.16E-06 | 3 |
| 516 | RARbeta               | RARB    | - | 105/153 | 2.35E-06 | 3 |
| 520 | CUX1                  | CUX1    | - | 68/92   | 2.47E-06 | 2 |
| 524 | NPAT                  | NPAT    | + | 71/97   | 2.73E-06 | 3 |
| 525 | DPF2                  | DPF2    | + | 197/313 | 2.74E-06 | 3 |
| 530 | SOX11                 | SOX11   | + | 61/81   | 2.83E-06 | 2 |
| 527 | UBF                   | UBTF    | + | 61/81   | 2.83E-06 | 3 |
| 534 | SNFT                  | BATF3   | - | 100/145 | 2.86E-06 | 3 |
| 544 | GATA-2                | GATA2   | - | 131/198 | 3.17E-06 | 3 |
| 547 | RelA (p65 NF-kB       | RELA    | + | 59/78   | 3.21E-06 | 1 |
| 566 | NFAT-90               | ILF3    | + | 65/88   | 4.25E-06 | 2 |
| 569 | TBP                   | TBP     | + | 60/80   | 4.29E-06 | 2 |
| 571 | JunD                  | JUND    | + | 60/80   | 4.29E-06 | 2 |
| 573 | NR2E3                 | NR2E3   | + | 157/244 | 4.37E-06 | 3 |
| 576 | SMAD1                 | SMAD1   | + | 174/274 | 4.59E-06 | 3 |
| 582 | HES1                  | HES1    | + | 117/175 | 4.84E-06 | 3 |
| 586 | c-Jun                 | JUN     | + | 151/234 | 5.19E-06 | 3 |
| 597 | BTEB1                 | KLF9    | - | 118/177 | 5.46E-06 | 3 |
| 611 | SP1                   | SP1     | + | 211/341 | 6.76E-06 | 3 |
| 612 | TFIIB                 | GTF2B   | + | 139/214 | 7.22E-06 | 3 |
| 615 | IRF9                  | IRF9    | + | 97/142  | 7.61E-06 | 3 |
| 620 | JunB                  | JUNB    | + | 177/281 | 7.88E-06 | 3 |
| 635 | CIZ1                  | CIZ1    | + | 115/173 | 8.77E-06 | 3 |
| 636 | NKRF                  | NKRF    | - | 126/192 | 8.90E-06 | 3 |
| 639 | SRF                   | SRF     | + | 146/227 | 9.55E-06 | 3 |
| 644 | PPAR-alpha            | PPARA   | - | 77/109  | 9.69E-06 | 2 |
| 658 | IRX3                  | IRX3    | - | 72/101  | 1.12E-05 | 3 |
| 675 | ATF-5                 | ATF5    | + | 38/47   | 1.25E-05 | 2 |
| 684 | NF-kB1 (p105)         | NFKB1   | - | 146/228 | 1.35E-05 | 3 |
| 688 | DEAF                  | DEAF1   | + | 25/28   | 1.37E-05 | 2 |
| 689 | Menin                 | MEN1    | - | 76/108  | 1.38E-05 | 2 |
| 699 | IRF9                  | IRF9    | + | 16/16   | 1.53E-05 | 1 |
| 705 | RelB (NF-kB subunit)  | RELB    | + | 60/82   | 1.62E-05 | 2 |
| 734 | KLF11 (TIEG2)         | KLF11   | - | 64/89   | 2.16E-05 | 2 |
| 775 | NF-kB2 (p100)         | NFKB2   | - | 146/231 | 3.61E-05 | 3 |
| 778 | SMARCA5               | SMARCA5 | + | 53/72   | 3.78E-05 | 3 |
| 797 | TFIIA gamma chain     | GTF2A2  | + | 80/117  | 4.36E-05 | 3 |
| 800 | PU.1                  | SPI1    | + | 23/26   | 4.40E-05 | 1 |
| 801 | c-Rel (NF-kB subunit) | REL     | + | 136/214 | 4.46E-05 | 3 |
| 808 | SP7                   | SP7     | + | 145/230 | 4.60E-05 | 3 |
| 812 | ATF-4                 | ATF4    | + | 173/280 | 4.79E-05 | 3 |
| 817 | CREB3                 | CREB3   | - | 126/197 | 5.43E-05 | 3 |
| 820 | NF-AT1(NFATC2)        | NFATC2  | + | 152/243 | 5.49E-05 | 3 |
| 821 | TFIIB                 | GTF2B   | + | 66/94   | 5.56E-05 | 2 |

|      |                |         |   |         |          |   |
|------|----------------|---------|---|---------|----------|---|
| 833  | ERG            | ERG     | + | 183/299 | 6.37E-05 | 3 |
| 837  | NF-kB1 (p50)   | NFKB1   | + | 164/265 | 6.54E-05 | 3 |
| 843  | Miz-1          | ZBTB17  | - | 170/276 | 7.01E-05 | 3 |
| 853  | NRB54          | NONO    | + | 126/198 | 7.59E-05 | 3 |
| 855  | NF-AT5         | NFAT5   | + | 71/103  | 7.66E-05 | 2 |
| 863  | LRRFIP1        | LRRFIP1 | + | 34/43   | 8.51E-05 | 2 |
| 864  | Neurogenin 3   | NEUROG3 | + | 34/43   | 8.51E-05 | 2 |
| 878  | NF-kB p50/p65  | RELA    | + | 28/34   | 9.76E-05 | 2 |
| 879  | NF-kB p50/p65  | NFKB1   | + | 28/34   | 9.76E-05 | 2 |
| 880  | ARNT           | ARNT    | + | 197/326 | 9.84E-05 | 3 |
| 900  | MEF2A          | MEF2A   | + | 35/45   | 1.24E-04 | 2 |
| 919  | E2F1           | E2F1    | + | 159/259 | 1.48E-04 | 3 |
| 937  | IRF7           | IRF7    | + | 49/68   | 1.79E-04 | 3 |
| 946  | NF-kB p50/p65  | RELA    | + | 18/20   | 2.01E-04 | 1 |
| 947  | NF-kB p50/p65  | NFKB1   | + | 18/20   | 2.01E-04 | 1 |
| 953  | SOX9           | SOX9    | + | 156/255 | 2.16E-04 | 3 |
| 962  | TAF4B          | TAF4B   | + | 69/102  | 2.34E-04 | 2 |
| 977  | IRF6           | IRF6    | + | 81/123  | 2.78E-04 | 3 |
| 997  | GFI-1          | GFI1    | - | 160/264 | 3.41E-04 | 3 |
| 1006 | BATF2          | BATF2   | + | 80/122  | 3.70E-04 | 2 |
| 1007 | PPAR-gamma     | PPARG   | - | 80/122  | 3.70E-04 | 2 |
| 1010 | TAFII55        | TAF7    | - | 109/173 | 3.87E-04 | 3 |
| 1027 | IRF3           | IRF3    | + | 19/22   | 4.28E-04 | 1 |
| 1036 | ATF-7          | ATF7    | + | 86/133  | 4.57E-04 | 3 |
| 1040 | STAT1          | STAT1   | + | 103/163 | 4.72E-04 | 2 |
| 1043 | IRF7           | IRF7    | + | 11/11   | 4.88E-04 | 1 |
| 1047 | NF-AT2(NFATC1) | NFATC1  | + | 96/151  | 5.32E-04 | 2 |
| 1063 | HSF1           | HSF1    | + | 73/111  | 5.76E-04 | 2 |
| 1069 | NF-AT2(NFATC1) | NFATC1  | + | 151/250 | 6.07E-04 | 3 |
| 1077 | SOX10          | SOX10   | + | 123/200 | 7.01E-04 | 3 |
| 1080 | NF-kB2 (p100)  | NFKB2   | - | 64/96   | 7.12E-04 | 2 |
| 1087 | NF-kB p65/p65  | RELA    | + | 22/27   | 7.57E-04 | 2 |
| 1088 | HOXA10         | HOXA10  | + | 22/27   | 7.57E-04 | 2 |
| 1093 | NF-kB1 (p50)   | NFKB1   | + | 106/170 | 7.93E-04 | 2 |
| 1102 | CNOT7          | CNOT7   | - | 103/165 | 8.80E-04 | 3 |
| 1107 | SIX4           | SIX4    | + | 46/66   | 9.29E-04 | 3 |
| 1113 | NF-kB1 (p105)  | NFKB1   | - | 63/95   | 9.62E-04 | 2 |
| 1135 | IRF2           | IRF2    | - | 67/102  | 9.96E-04 | 2 |
| 1117 | TFIID          | TAF10   | + | 67/102  | 9.96E-04 | 3 |
| 1118 | TFIID          | TAF7L   | + | 67/102  | 9.96E-04 | 3 |
| 1119 | TFIID          | TAF15   | + | 67/102  | 9.96E-04 | 3 |
| 1120 | TFIID          | TAF7    | + | 67/102  | 9.96E-04 | 3 |
| 1121 | TFIID          | TAF8    | + | 67/102  | 9.96E-04 | 3 |
| 1122 | TFIID          | TAF4B   | + | 67/102  | 9.96E-04 | 3 |
| 1123 | TFIID          | TAF1    | + | 67/102  | 9.96E-04 | 3 |
| 1124 | TFIID          | TAF13   | + | 67/102  | 9.96E-04 | 3 |
| 1125 | TFIID          | TAF9B   | + | 67/102  | 9.96E-04 | 3 |
| 1126 | TFIID          | TAF12   | + | 67/102  | 9.96E-04 | 3 |

|      |                   |        |   |         |          |   |
|------|-------------------|--------|---|---------|----------|---|
| 1127 | TFIID             | TAF2   | + | 67/102  | 9.96E-04 | 3 |
| 1128 | TFIID             | TAF9   | + | 67/102  | 9.96E-04 | 3 |
| 1129 | TFIID             | TBP    | + | 67/102  | 9.96E-04 | 3 |
| 1130 | TFIID             | TAF4   | + | 67/102  | 9.96E-04 | 3 |
| 1131 | TFIID             | TAF6   | + | 67/102  | 9.96E-04 | 3 |
| 1132 | TFIID             | TAF3   | + | 67/102  | 9.96E-04 | 3 |
| 1133 | TFIID             | TAF5   | + | 67/102  | 9.96E-04 | 3 |
| 1134 | TFIID             | TAF11  | + | 67/102  | 9.96E-04 | 3 |
| 1159 | ELF3              | ELF3   | + | 66/101  | 1.33E-03 | 2 |
| 1176 | Bcl-6             | BCL6   | - | 12/13   | 1.71E-03 | 1 |
| 1190 | IRF4              | IRF4   | + | 38/54   | 1.92E-03 | 2 |
| 1198 | NFAT-90           | ILF3   | + | 124/206 | 2.09E-03 | 3 |
| 1204 | NRF2              | NFE2L2 | - | 105/172 | 2.32E-03 | 3 |
| 1221 | NF-kB p52/RelB    | NFKB2  | + | 21/27   | 2.96E-03 | 2 |
| 1222 | NF-kB p52/RelB    | RELB   | + | 21/27   | 2.96E-03 | 2 |
| 1223 | NF-kB p65/c-Rel   | RELA   | + | 21/27   | 2.96E-03 | 2 |
| 1224 | NF-kB p65/c-Rel   | REL    | + | 21/27   | 2.96E-03 | 2 |
| 1232 | BLIMP1 (PRDI-BF1) | PRDM1  | - | 11/12   | 3.17E-03 | 1 |
| 1236 | NF-kB             |        | + | 19/24   | 3.31E-03 | 1 |
| 1250 | NF-AT4(NFATC3)    | NFATC3 | + | 36/52   | 3.89E-03 | 2 |
| 1262 | MafB              | MAFB   | - | 25/34   | 4.52E-03 | 2 |
| 1264 | TFE3              | TFE3   | + | 44/66   | 4.61E-03 | 3 |
| 1265 | NF-kB p50/c-Rel   | NFKB1  | + | 20/26   | 4.68E-03 | 2 |
| 1266 | NF-kB p50/c-Rel   | REL    | + | 20/26   | 4.68E-03 | 2 |
| 1270 | MafB              | MAFB   | - | 56/87   | 4.84E-03 | 3 |
| 1272 | DEAF              | DEAF1  | + | 41/61   | 4.93E-03 | 3 |
| 1275 | Nibrin            | NBN    | + | 45/68   | 5.17E-03 | 2 |
| 1277 | PR (nuclear)      | PGR    | - | 75/121  | 5.31E-03 | 2 |
| 1278 | IRF7              | IRF7   | + | 18/23   | 5.31E-03 | 2 |
| 1285 | MITF              | MITF   | + | 43/65   | 6.25E-03 | 2 |
| 1286 | GATA-3            | GATA3  | - | 12/14   | 6.47E-03 | 1 |
| 1300 | PU.1              | SPI1   | + | 42/64   | 8.43E-03 | 2 |
| 1303 | ATOX8             | ATOX8  | - | 39/59   | 9.17E-03 | 2 |

**Supplementary Table 4. Causal reasoning results using DEGs that has  $\log_2FC \geq 5$  or  $\leq -5$  and  $FDR \leq 0.05$ .**

| Rank | Molecular Entity     | Gene    | Predicted Activity | Correct/Total network predictions | Activity Prediction p-value | Calculation Distance |
|------|----------------------|---------|--------------------|-----------------------------------|-----------------------------|----------------------|
| 83   | IRF1                 | IRF1    | +                  | 17/17                             | 7.63E-06                    | 1                    |
| 409  | STAT1                | STAT1   | +                  | 15/16                             | 2.59E-04                    | 1                    |
| 534  | RelA (p65 NF-kB      | RELA    | +                  | 14/15                             | 4.88E-04                    | 1                    |
| 719  | IRF3                 | IRF3    | +                  | 9/9                               | 1.95E-03                    | 1                    |
| 864  | STAT2                | STAT2   | +                  | 8/8                               | 3.91E-03                    | 1                    |
| 25   | IRF1                 | IRF1    | +                  | 23/24                             | 1.49E-06                    | 2                    |
| 62   | MECOM                | MECOM   | -                  | 21/22                             | 5.48E-06                    | 2                    |
| 64   | c-Jun                | JUN     | +                  | 21/22                             | 5.48E-06                    | 2                    |
| 93   | KLF5                 | KLF5    | +                  | 23/25                             | 9.72E-06                    | 2                    |
| 128  | C/EBPbeta            | CEBPB   | +                  | 25/28                             | 1.37E-05                    | 2                    |
| 130  | NFAT-90              | ILF3    | +                  | 16/16                             | 1.53E-05                    | 2                    |
| 147  | STAT2                | STAT2   | +                  | 22/24                             | 1.79E-05                    | 2                    |
| 213  | FXR                  | NR1H4   | -                  | 20/22                             | 6.06E-05                    | 2                    |
| 271  | PPAR-alpha           | PPARA   | -                  | 19/21                             | 1.11E-04                    | 2                    |
| 298  | CUX1                 | CUX1    | -                  | 16/17                             | 1.37E-04                    | 2                    |
| 360  | IRF9                 | IRF9    | +                  | 18/20                             | 2.01E-04                    | 2                    |
| 396  | FOXP3                | FOXP3   | -                  | 15/16                             | 2.59E-04                    | 2                    |
| 399  | KLF6                 | KLF6    | +                  | 15/16                             | 2.59E-04                    | 2                    |
| 404  | CREB1                | CREB1   | +                  | 15/16                             | 2.59E-04                    | 2                    |
| 411  | NF-kB2 (p100)        | NFKB2   | -                  | 15/16                             | 2.59E-04                    | 2                    |
| 456  | Menin                | MEN1    | -                  | 17/19                             | 3.64E-04                    | 2                    |
| 479  | GFI-1                | GFI1    | -                  | 19/22                             | 4.28E-04                    | 2                    |
| 510  | DEAF                 | DEAF1   | +                  | 11/11                             | 4.88E-04                    | 2                    |
| 512  | CNOT7                | CNOT7   | -                  | 14/15                             | 4.88E-04                    | 2                    |
| 543  | TAF4B                | TAF4B   | +                  | 16/18                             | 6.56E-04                    | 2                    |
| 545  | RelB (NF-kB subunit) | RELB    | +                  | 16/18                             | 6.56E-04                    | 2                    |
| 611  | BARX2                | BARX2   | +                  | 10/10                             | 9.77E-04                    | 2                    |
| 612  | IRF4                 | IRF4    | +                  | 10/10                             | 9.77E-04                    | 2                    |
| 613  | HMGB1                | HMGB1   | +                  | 10/10                             | 9.77E-04                    | 2                    |
| 636  | PPAR-gamma           | PPARG   | -                  | 15/17                             | 1.18E-03                    | 2                    |
| 718  | NF-AT4(NFATC3)       | NFATC3  | +                  | 9/9                               | 1.95E-03                    | 2                    |
| 720  | c-Rel (NF-kB         | REL     | +                  | 9/9                               | 1.95E-03                    | 2                    |
| 736  | RelA (p65 NF-kB      | RELA    | +                  | 20/25                             | 2.04E-03                    | 2                    |
| 754  | TFIIB                | GTF2B   | +                  | 14/16                             | 2.09E-03                    | 2                    |
| 757  | NF-kB1 (p50)         | NFKB1   | +                  | 18/22                             | 2.17E-03                    | 2                    |
| 812  | PAX7                 | PAX7    | -                  | 11/12                             | 3.17E-03                    | 2                    |
| 814  | MKL1                 | MRTFA   | +                  | 11/12                             | 3.17E-03                    | 2                    |
| 828  | DSIPI (GILZ)         | TSC22D3 | -                  | 17/21                             | 3.60E-03                    | 2                    |
| 838  | ELF3                 | ELF3    | +                  | 13/15                             | 3.69E-03                    | 2                    |
| 855  | NF-AT5               | NFAT5   | +                  | 15/18                             | 3.77E-03                    | 2                    |
| 856  | NF-AT2(NFATC1)       | NFATC1  | +                  | 15/18                             | 3.77E-03                    | 2                    |
| 862  | ATF-5                | ATF5    | +                  | 8/8                               | 3.91E-03                    | 2                    |

|      |                  |        |   |       |          |   |
|------|------------------|--------|---|-------|----------|---|
| 881  | STAT1            | STAT1  | + | 20/26 | 4.68E-03 | 2 |
| 911  | NRB54            | NONO   | + | 16/20 | 5.91E-03 | 2 |
| 929  | NF-kB1 (p105)    | NFKB1  | - | 14/17 | 6.36E-03 | 2 |
| 935  | KLF11 (TIEG2)    | KLF11  | - | 14/17 | 6.36E-03 | 2 |
| 945  | TIF1-beta        | TRIM28 | - | 12/14 | 6.47E-03 | 2 |
| 955  | NOTCH1 (NICD)    | NOTCH1 | + | 19/25 | 7.32E-03 | 2 |
| 960  | NF-kB p65/p65    | RELA   | + | 7/7   | 7.81E-03 | 2 |
| 962  | NF-kB p50/p65    | RELA   | + | 7/7   | 7.81E-03 | 2 |
| 963  | NF-kB p50/p65    | NFKB1  | + | 7/7   | 7.81E-03 | 2 |
| 966  | PEG3             | PEG3   | - | 7/7   | 7.81E-03 | 2 |
| 992  | NUR77            | NR4A1  | - | 17/22 | 8.45E-03 | 2 |
| 1002 | PPAR-beta(delta) | PPARD  | - | 15/19 | 9.61E-03 | 2 |
| 10   | HNF1-alpha       | HNF1A  | + | 28/30 | 4.34E-07 | 3 |
| 11   | IRF1             | IRF1   | + | 33/37 | 5.42E-07 | 3 |
| 19   | TAFII70          | TAF6   | + | 23/24 | 1.49E-06 | 3 |
| 24   | NF-AT4(NFATC3)   | NFATC3 | + | 23/24 | 1.49E-06 | 3 |
| 28   | ATF-5            | ATF5   | + | 31/35 | 1.73E-06 | 3 |
| 37   | SRF              | SRF    | + | 25/27 | 2.82E-06 | 3 |
| 72   | CUX1             | CUX1   | - | 26/29 | 7.62E-06 | 3 |
| 90   | HEYL             | HEYL   | - | 23/25 | 9.72E-06 | 3 |
| 126  | c-Jun            | JUN    | + | 25/28 | 1.37E-05 | 3 |
| 129  | NPAT             | NPAT   | + | 16/16 | 1.53E-05 | 3 |
| 132  | MEF2D            | MEF2D  | + | 27/31 | 1.70E-05 | 3 |
| 151  | MECOM            | MECOM  | - | 29/34 | 1.93E-05 | 3 |
| 162  | CREB3            | CREB3  | - | 24/27 | 2.46E-05 | 3 |
| 168  | PPAR-alpha       | PPARA  | - | 26/30 | 2.97E-05 | 3 |
| 169  | c-Fos            | FOS    | + | 26/30 | 2.97E-05 | 3 |
| 170  | STAT2            | STAT2  | + | 26/30 | 2.97E-05 | 3 |
| 202  | CC2D1A           | CC2D1A | + | 25/29 | 5.19E-05 | 3 |
| 209  | KLF5             | KLF5   | + | 27/32 | 5.65E-05 | 3 |
| 210  | SMAD1            | SMAD1  | + | 27/32 | 5.65E-05 | 3 |
| 246  | NP220            | ZNF638 | + | 24/28 | 9.00E-05 | 3 |
| 262  | NF-AT1(NFATC2)   | NFATC2 | + | 26/31 | 9.61E-05 | 3 |
| 264  | C/EBPbeta        | CEBPB  | + | 28/34 | 9.76E-05 | 3 |
| 265  | SNFT             | BATF3  | - | 19/21 | 1.11E-04 | 3 |
| 296  | Fra-1            | FOSL1  | + | 16/17 | 1.37E-04 | 3 |
| 305  | NKRF             | NKRF   | - | 21/24 | 1.39E-04 | 3 |
| 326  | ERG              | ERG    | + | 27/33 | 1.62E-04 | 3 |
| 334  | GATA-2           | GATA2  | - | 25/30 | 1.63E-04 | 3 |
| 361  | Esrra            | ESRRA  | - | 18/20 | 2.01E-04 | 3 |
| 381  | DACH1            | DACH1  | - | 28/35 | 2.54E-04 | 3 |
| 383  | UBF              | UBTF   | + | 15/16 | 2.59E-04 | 3 |
| 438  | Bcl-6            | BCL6   | - | 26/32 | 2.68E-04 | 3 |
| 444  | PELP1            | PELP1  | + | 24/29 | 2.73E-04 | 3 |
| 453  | c-Rel (NF-kB     | REL    | + | 24/29 | 2.73E-04 | 3 |
| 481  | NF-kB1 (p105)    | NFKB1  | - | 25/31 | 4.39E-04 | 3 |
| 485  | NR2E3            | NR2E3  | + | 25/31 | 4.39E-04 | 3 |
| 503  | GABP alpha       | GABPA  | + | 21/25 | 4.55E-04 | 3 |

|      |                      |         |   |       |          |   |
|------|----------------------|---------|---|-------|----------|---|
| 505  | AF-10                | MLLT10  | + | 23/28 | 4.56E-04 | 3 |
| 536  | STAT1                | STAT1   | + | 28/36 | 5.97E-04 | 3 |
| 552  | Zac1                 | PLAGL1  | + | 26/33 | 6.59E-04 | 3 |
| 575  | SOX11                | SOX11   | + | 22/27 | 7.57E-04 | 3 |
| 580  | TWIST1               | TWIST1  | + | 22/27 | 7.57E-04 | 3 |
| 592  | IRF9                 | IRF9    | + | 20/24 | 7.72E-04 | 3 |
| 605  | HEY2                 | HEY2    | - | 13/14 | 9.16E-04 | 3 |
| 610  | TLE4                 | TLE4    | - | 10/10 | 9.77E-04 | 3 |
| 620  | RelA (p65 NF-kB      | RELA    | + | 25/32 | 1.05E-03 | 3 |
| 628  | RelB (NF-kB subunit) | RELB    | + | 23/29 | 1.16E-03 | 3 |
| 657  | JunD                 | JUND    | + | 21/26 | 1.25E-03 | 3 |
| 686  | ATF-7                | ATF7    | + | 19/23 | 1.30E-03 | 3 |
| 700  | KLF6                 | KLF6    | + | 22/28 | 1.86E-03 | 3 |
| 705  | TBP                  | TBP     | + | 22/28 | 1.86E-03 | 3 |
| 712  | ENL                  | MLLT1   | + | 9/9   | 1.95E-03 | 3 |
| 726  | TAFII55              | TAF7    | - | 20/25 | 2.04E-03 | 3 |
| 734  | SOX10                | SOX10   | + | 20/25 | 2.04E-03 | 3 |
| 735  | BAPX1                | NKX3-2  | + | 20/25 | 2.04E-03 | 3 |
| 737  | SMARCA5              | SMARCA5 | + | 14/16 | 2.09E-03 | 3 |
| 791  | FOXP3                | FOXP3   | - | 21/27 | 2.96E-03 | 3 |
| 794  | PAX6                 | PAX6    | - | 21/27 | 2.96E-03 | 3 |
| 795  | NFAT-90              | ILF3    | + | 21/27 | 2.96E-03 | 3 |
| 798  | TFIIB                | GTF2B   | + | 21/27 | 2.96E-03 | 3 |
| 821  | WT1                  | WT1     | - | 19/24 | 3.31E-03 | 3 |
| 842  | NRIF                 | ZNF274  | - | 13/15 | 3.69E-03 | 3 |
| 867  | KLF11 (TIEG2)        | KLF11   | - | 22/29 | 4.07E-03 | 3 |
| 874  | CNOT7                | CNOT7   | - | 20/26 | 4.68E-03 | 3 |
| 876  | NRB54                | NONO    | + | 20/26 | 4.68E-03 | 3 |
| 883  | NRF2                 | NFE2L2  | - | 20/26 | 4.68E-03 | 3 |
| 884  | MEF2C                | MEF2C   | + | 20/26 | 4.68E-03 | 3 |
| 902  | IRF7                 | IRF7    | + | 10/11 | 5.86E-03 | 3 |
| 926  | GATA-4               | GATA4   | + | 21/28 | 6.27E-03 | 3 |
| 927  | NF-AT5               | NFAT5   | + | 21/28 | 6.27E-03 | 3 |
| 937  | IRF4                 | IRF4    | + | 14/17 | 6.36E-03 | 3 |
| 967  | Myocardin            | MYOCD   | + | 22/30 | 8.06E-03 | 3 |
| 985  | FOKK1                | FOKK1   | - | 17/22 | 8.45E-03 | 3 |
| 995  | CIZ1                 | CIZ1    | + | 20/27 | 9.58E-03 | 3 |
| 1000 | TAF4B                | TAF4B   | + | 20/27 | 9.58E-03 | 3 |
| 1003 | VENTX                | VENTX   | - | 15/19 | 9.61E-03 | 3 |
| 1011 | NF-kB                |         | + | 15/19 | 9.61E-03 | 3 |

**Supplementary Table 5. All adverse events in females for COVID-19 vaccines reported in VAERS database as of 22 November 2021.**

| Symptoms                     | Symptoms Code | Events Reported |
|------------------------------|---------------|-----------------|
| HEADACHE                     | 10019211      | 104639          |
| FATIGUE                      | 10016256      | 88113           |
| PYREXIA                      | 10037660      | 84563           |
| PAIN                         | 10033371      | 76962           |
| CHILLS                       | 10008531      | 71840           |
| NAUSEA                       | 10028813      | 60339           |
| PAIN IN EXTREMITY            | 10033425      | 58773           |
| DIZZINESS                    | 10013573      | 55089           |
| COVID-19                     | 10084268      | 37390           |
| MYALGIA                      | 10028411      | 34673           |
| ARTHRALGIA                   | 10003239      | 34022           |
| INJECTION SITE PAIN          | 10022086      | 33474           |
| DYSPNOEA                     | 10013968      | 31980           |
| RASH                         | 10037844      | 31388           |
| PRURITUS                     | 10037087      | 31208           |
| INJECTION SITE ERYTHEMA      | 10022061      | 26402           |
| SARS-COV-2 TEST POSITIVE     | 10084271      | 25423           |
| VOMITING                     | 10047700      | 24063           |
| ASTHENIA                     | 10003549      | 22671           |
| INJECTION SITE SWELLING      | 10053425      | 21565           |
| ERYTHEMA                     | 10015150      | 21144           |
| DIARRHOEA                    | 10012735      | 20075           |
| URTICARIA                    | 10046735      | 19911           |
| LYMPHADENOPATHY              | 10025197      | 19794           |
| FEELING ABNORMAL             | 10016322      | 19726           |
| PARAESTHESIA                 | 10033775      | 19690           |
| COUGH                        | 10011224      | 19449           |
| INJECTION SITE PRURITUS      | 10022093      | 18197           |
| HYPOAESTHESIA                | 10020937      | 18105           |
| MALaise                      | 10025482      | 17644           |
| SARS-COV-2 TEST              | 10084354      | 16068           |
| PERIPHERAL SWELLING          | 10048959      | 15662           |
| CHEST PAIN                   | 10008479      | 15524           |
| HYPERHIDROSIS                | 10020642      | 14499           |
| EXPIRED PRODUCT ADMINISTERED | 10074902      | 13789           |
| INJECTION SITE WARMTH        | 10022112      | 13608           |
| VACCINATION SITE PAIN        | 10068879      | 13151           |
| BLOOD TEST                   | 10061726      | 12959           |



|                                                      |          |       |
|------------------------------------------------------|----------|-------|
| PRODUCT STORAGE ERROR                                | 10079843 | 12821 |
| PALPITATIONS                                         | 10033557 | 12541 |
| CHEST DISCOMFORT                                     | 10008469 | 12404 |
| NO ADVERSE EVENT                                     | 10067482 | 12183 |
| CONDITION AGGRAVATED                                 | 10010264 | 11950 |
| OROPHARYNGEAL PAIN                                   | 10068319 | 11777 |
| BACK PAIN                                            | 10003988 | 11372 |
| HEART RATE INCREASED                                 | 10019303 | 11344 |
| SWELLING                                             | 10042674 | 10660 |
| TREMOR                                               | 10044565 | 10600 |
| FEELING HOT                                          | 10016334 | 10003 |
| INJECTION SITE RASH                                  | 10022094 | 9834  |
| DECREASED APPETITE                                   | 10061428 | 9650  |
| TINNITUS                                             | 10043882 | 9449  |
| NECK PAIN                                            | 10028836 | 9363  |
| SYNCOPE                                              | 10042772 | 9065  |
| RASH ERYTHEMATOUS                                    | 10037855 | 8902  |
| MOBILITY DECREASED                                   | 10048334 | 8567  |
| ELECTROCARDIOGRAM                                    | 10014362 | 8464  |
| MIGRAINE                                             | 10027599 | 8401  |
| SKIN WARM                                            | 10040952 | 8132  |
| BODY TEMPERATURE                                     | 10005906 | 7910  |
| RASH PRURITIC                                        | 10037884 | 7670  |
| INFLUENZA LIKE ILLNESS                               | 10022004 | 7445  |
| SARS-COV-2 TEST NEGATIVE                             | 10084273 | 7140  |
| FLUSHING                                             | 10016825 | 6969  |
| MUSCLE SPASMS                                        | 10028334 | 6961  |
| PRODUCT ADMINISTERED TO PATIENT OF INAPPROPRIATE AGE | 10081578 | 6748  |
| SLEEP DISORDER                                       | 10040984 | 6725  |
| INAPPROPRIATE SCHEDULE OF PRODUCT ADMINISTRATION     | 10081572 | 6698  |
| LOSS OF CONSCIOUSNESS                                | 10024855 | 6608  |
| ANXIETY                                              | 10002855 | 6583  |
| INSOMNIA                                             | 10022437 | 6557  |
| VACCINATION SITE ERYTHEMA                            | 10059079 | 6549  |
| VERTIGO                                              | 10047340 | 6468  |
| LABORATORY TEST                                      | 10059938 | 6440  |
| ABDOMINAL PAIN UPPER                                 | 10000087 | 6438  |
| SWELLING FACE                                        | 10042682 | 6396  |
| BURNING SENSATION                                    | 10006784 | 6376  |
| RHINORRHOEA                                          | 10039101 | 6326  |
| GAIT DISTURBANCE                                     | 10017577 | 6262  |
| COMPUTERISED TOMOGRAPH                               | 10010234 | 6026  |
| PARAESTHESIA ORAL                                    | 10057372 | 5954  |

|                                                   |          |      |
|---------------------------------------------------|----------|------|
| ABDOMINAL PAIN                                    | 10000081 | 5906 |
| THROAT IRRITATION                                 | 10043521 | 5778 |
| THROAT TIGHTNESS                                  | 10043528 | 5730 |
| FEELING COLD                                      | 10016326 | 5635 |
| MUSCULAR WEAKNESS                                 | 10028372 | 5605 |
| IMPAIRED WORK ABILITY                             | 10052302 | 5583 |
| HYPERTENSION                                      | 10020772 | 5429 |
| MUSCULOSKELETAL STIFFNESS                         | 10052904 | 5423 |
| LETHARGY                                          | 10024264 | 5415 |
| BODY TEMPERATURE INCREASED                        | 10005911 | 5405 |
| VACCINATION SITE SWELLING                         | 10069620 | 5373 |
| DRUG INEFFECTIVE                                  | 10013709 | 5360 |
| VISION BLURRED                                    | 10047513 | 5360 |
| AXILLARY PAIN                                     | 10048750 | 5335 |
| SOMNOLENCE                                        | 10041349 | 5333 |
| HERPES ZOSTER                                     | 10019974 | 5247 |
| TACHYCARDIA                                       | 10043071 | 5166 |
| INJECTION SITE INDURATION                         | 10022075 | 5092 |
| HEAVY MENSTRUAL BLEEDING                          | 10085423 | 5070 |
| BLOOD PRESSURE INCREASED                          | 10005750 | 5056 |
| INCORRECT DOSE ADMINISTERED                       | 10064355 | 5034 |
| DEATH                                             | 10011906 | 5031 |
| INTERCHANGE OF VACCINE PRODUCTS                   | 10070574 | 5028 |
| FULL BLOOD COUNT                                  | 10017411 | 5023 |
| EXTRA DOSE ADMINISTERED                           | 10064366 | 4806 |
| ABDOMINAL DISCOMFORT                              | 10000059 | 4767 |
| ILLNESS                                           | 10080284 | 4750 |
| LYMPH NODE PAIN                                   | 10025182 | 4743 |
| NASAL CONGESTION                                  | 10028735 | 4743 |
| IMMEDIATE POST-INJECTION REACTION                 | 10067142 | 4712 |
| CHEST X-RAY                                       | 10008498 | 4691 |
| FALL                                              | 10016173 | 4590 |
| LIP SWELLING                                      | 10024570 | 4499 |
| MAGNETIC RESONANCE IMAGING                        | 10078223 | 4438 |
| TENDERNESS                                        | 10043224 | 4369 |
| LOSS OF PERSONAL INDEPENDENCE IN DAILY ACTIVITIES | 10079487 | 4367 |
| LIMB DISCOMFORT                                   | 10061224 | 4273 |
| METABOLIC FUNCTION TEST                           | 10062191 | 4215 |
| DYSPHAGIA                                         | 10013950 | 4187 |
| VACCINATION SITE PRURITUS                         | 10068881 | 4182 |
| INJECTION SITE REACTION                           | 10022095 | 4174 |
| RESPIRATORY TRACT CONGESTION                      | 10052251 | 4154 |
| HYPOAESTHESIA ORAL                                | 10057371 | 4110 |

|                                |          |      |
|--------------------------------|----------|------|
| UNEVALUABLE EVENT              | 10062355 | 3983 |
| SWOLLEN TONGUE                 | 10042727 | 3975 |
| DISCOMFORT                     | 10013082 | 3906 |
| DYSGEUSIA                      | 10013911 | 3898 |
| CONFUSIONAL STATE              | 10010305 | 3868 |
| MENSTRUATION IRREGULAR         | 10027339 | 3860 |
| ELECTROCARDIOGRAM NORMAL       | 10014373 | 3834 |
| PHARYNGEAL SWELLING            | 10082270 | 3775 |
| EXPOSURE DURING PREGNANCY      | 10073513 | 3772 |
| HYPERSENSITIVITY               | 10020751 | 3765 |
| AGEUSIA                        | 10001480 | 3685 |
| RASH MACULAR                   | 10037867 | 3632 |
| BLOOD TEST NORMAL              | 10050540 | 3617 |
| CONTUSION                      | 10050584 | 3551 |
| EAR PAIN                       | 10014020 | 3486 |
| NASOPHARYNGITIS                | 10028810 | 3404 |
| ULTRASOUND SCAN                | 10045434 | 3403 |
| VACCINATION SITE WARMTH        | 10069624 | 3399 |
| INFLAMMATION                   | 10061218 | 3395 |
| VACCINE BREAKTHROUGH INFECTION | 10067923 | 3318 |
| HOT FLUSH                      | 10060800 | 3279 |
| X-RAY                          | 10048064 | 3231 |
| VISUAL IMPAIRMENT              | 10047571 | 3225 |
| ECHOCARDIOGRAM                 | 10014113 | 3188 |
| BLOOD PRESSURE MEASUREMENT     | 10076581 | 3125 |
| PALLOR                         | 10033546 | 3082 |
| ANOSMIA                        | 10002653 | 2995 |
| BALANCE DISORDER               | 10049848 | 2967 |
| JOINT SWELLING                 | 10023232 | 2955 |
| MENSTRUAL DISORDER             | 10027327 | 2928 |
| VACCINATION COMPLICATION       | 10046861 | 2865 |
| THROMBOSIS                     | 10043607 | 2864 |
| RASH PAPULAR                   | 10037876 | 2841 |
| URINE ANALYSIS                 | 10046614 | 2820 |
| SEIZURE                        | 10039906 | 2775 |
| HYPOTENSION                    | 10021097 | 2773 |
| HEART RATE                     | 10019299 | 2755 |
| UNDERDOSE                      | 10057362 | 2751 |
| VACCINATION FAILURE            | 10046862 | 2726 |
| COLD SWEAT                     | 10009866 | 2710 |
| CHEST X-RAY NORMAL             | 10008500 | 2703 |
| INJECTION SITE MASS            | 10022081 | 2692 |
| EYE PAIN                       | 10015958 | 2689 |

|                                            |          |      |
|--------------------------------------------|----------|------|
| EYE SWELLING                               | 10015967 | 2669 |
| WHEEZING                                   | 10047924 | 2664 |
| HEAD DISCOMFORT                            | 10019194 | 2655 |
| VACCINATION SITE RASH                      | 10069482 | 2570 |
| UNRESPONSIVE TO STIMULI                    | 10045555 | 2503 |
| PRODUCT PREPARATION ISSUE                  | 10081301 | 2469 |
| INCORRECT PRODUCT FORMULATION ADMINISTERED | 10074946 | 2457 |
| IMMUNISATION                               | 10021430 | 2436 |
| POOR QUALITY PRODUCT ADMINISTERED          | 10081478 | 2427 |
| FULL BLOOD COUNT NORMAL                    | 10017414 | 2260 |
| HYPERMOMNIA                                | 10020765 | 2259 |
| NEURALGIA                                  | 10029223 | 2234 |
| COVID-19 PNEUMONIA                         | 10084380 | 2224 |
| CHEST X-RAY ABNORMAL                       | 10008499 | 2210 |
| EAR DISCOMFORT                             | 10052137 | 2208 |
| PRESYNCOPE                                 | 10036653 | 2191 |
| PRODUCT TEMPERATURE EXCURSION ISSUE        | 10083571 | 2191 |
| BONE PAIN                                  | 10006002 | 2189 |
| DYSSTASIA                                  | 10050256 | 2154 |
| SKIN DISCOLOURATION                        | 10040829 | 2149 |
| DEHYDRATION                                | 10012174 | 2141 |
| DYSMENORRHOEA                              | 10013935 | 2139 |
| BREAST PAIN                                | 10006298 | 2081 |
| INJECTION SITE BRUISING                    | 10022052 | 2064 |
| BLISTER                                    | 10005191 | 2043 |
| NIGHT SWEATS                               | 10029410 | 2037 |
| BELL'S PALSY                               | 10004223 | 2001 |
| PNEUMONIA                                  | 10035664 | 2001 |
| LABORATORY TEST NORMAL                     | 10054052 | 1977 |
| CEREBROVASCULAR ACCIDENT                   | 10008190 | 1955 |
| SNEEZING                                   | 10041232 | 1941 |
| INDURATION                                 | 10060708 | 1915 |
| PULMONARY EMBOLISM                         | 10037377 | 1900 |
| MUSCLE TWITCHING                           | 10028347 | 1873 |
| PAIN IN JAW                                | 10033433 | 1864 |
| URINARY TRACT INFECTION                    | 10046571 | 1858 |
| GAIT INABILITY                             | 10017581 | 1843 |
| NERVOUSNESS                                | 10029216 | 1832 |
| ATRIAL FIBRILLATION                        | 10003658 | 1826 |
| TASTE DISORDER                             | 10082490 | 1825 |
| ANTICOAGULANT THERAPY                      | 10053468 | 1823 |
| HYPOXIA                                    | 10021143 | 1803 |
| EXPOSURE TO SARS-COV-2                     | 10084456 | 1784 |

|                                  |          |      |
|----------------------------------|----------|------|
| DRY MOUTH                        | 10013781 | 1777 |
| VAGINAL HAEMORRHAGE              | 10046910 | 1750 |
| DYSPHONIA                        | 10013952 | 1742 |
| DISTURBANCE IN ATTENTION         | 10013496 | 1738 |
| MUSCLE TIGHTNESS                 | 10049816 | 1737 |
| EPISTAXIS                        | 10015090 | 1734 |
| ELECTROCARDIOGRAM ABNORMAL       | 10014363 | 1693 |
| FACIAL PARALYSIS                 | 10016062 | 1693 |
| PHOTOPHOBIA                      | 10034960 | 1659 |
| ANAPHYLACTIC REACTION            | 10002198 | 1650 |
| OEDEMA PERIPHERAL                | 10030124 | 1636 |
| ALOPECIA                         | 10001760 | 1626 |
| COMPUTERISED TOMOGRAM HEAD       | 10054003 | 1621 |
| INJECTED LIMB MOBILITY DECREASED | 10057664 | 1615 |
| COMPUTERISED TOMOGRAM NORMAL     | 10010236 | 1614 |
| DISORIENTATION                   | 10013395 | 1604 |
| ASTHMA                           | 10003553 | 1590 |
| PAIN OF SKIN                     | 10033474 | 1547 |
| PRODUCT DOSE OMISSION ISSUE      | 10084406 | 1546 |
| JOINT RANGE OF MOTION DECREASED  | 10048706 | 1539 |
| VACCINE POSITIVE RECHALLENGE     | 10066903 | 1505 |
| OFF LABEL USE                    | 10053762 | 1500 |
| INTERMENSTRUAL BLEEDING          | 10022559 | 1497 |
| INTENSIVE CARE                   | 10022519 | 1493 |
| BLOOD GLUCOSE NORMAL             | 10005558 | 1492 |
| PRODUCTIVE COUGH                 | 10036790 | 1492 |
| WEIGHT DECREASED                 | 10047895 | 1490 |
| MEMORY IMPAIRMENT                | 10027175 | 1486 |
| ARTHRITIS                        | 10003246 | 1479 |
| DYSPEPSIA                        | 10013946 | 1478 |
| MOVEMENT DISORDER                | 10028035 | 1470 |
| WRONG PRODUCT ADMINISTERED       | 10081579 | 1467 |
| PERIPHERAL COLDNESS              | 10034568 | 1466 |
| WHITE BLOOD CELL COUNT INCREASED | 10047943 | 1457 |
| ACUTE RESPIRATORY FAILURE        | 10001053 | 1438 |
| SPEECH DISORDER                  | 10041466 | 1432 |
| CELLULITIS                       | 10007882 | 1414 |
| ABDOMINAL DISTENSION             | 10000060 | 1413 |
| HEART RATE IRREGULAR             | 10019304 | 1408 |
| OXYGEN SATURATION DECREASED      | 10033318 | 1406 |
| MAGNETIC RESONANCE IMAGING HEAD  | 10085255 | 1401 |
| APHASIA                          | 10002948 | 1393 |
| RETCHING                         | 10038776 | 1393 |

|                                       |          |      |
|---------------------------------------|----------|------|
| INJECTION SITE URTICARIA              | 10022107 | 1378 |
| BLOOD GLUCOSE INCREASED               | 10005557 | 1374 |
| OROPHARYNGEAL DISCOMFORT              | 10068318 | 1362 |
| BLOOD TEST ABNORMAL                   | 10061016 | 1339 |
| SKIN BURNING SENSATION                | 10054786 | 1336 |
| DEEP VEIN THROMBOSIS                  | 10051055 | 1293 |
| FIBRIN D DIMER                        | 10016577 | 1291 |
| ABORTION SPONTANEOUS                  | 10000234 | 1263 |
| SINUSITIS                             | 10040753 | 1260 |
| NODULE                                | 10054107 | 1260 |
| FACIAL PAIN                           | 10016059 | 1249 |
| MENSTRUATION DELAYED                  | 10027336 | 1248 |
| EYE PRURITUS                          | 10052140 | 1248 |
| VACCINATION SITE REACTION             | 10059080 | 1247 |
| FEEDING DISORDER                      | 10061148 | 1245 |
| OCULAR HYPERAEMIA                     | 10030041 | 1241 |
| VACCINATION SITE MASS                 | 10076182 | 1235 |
| C-REACTIVE PROTEIN INCREASED          | 10006825 | 1225 |
| FIBRIN D DIMER INCREASED              | 10016581 | 1222 |
| ORAL HERPES                           | 10067152 | 1221 |
| SUSPECTED COVID-19                    | 10084451 | 1214 |
| VACCINATION SITE INDURATION           | 10065117 | 1209 |
| MATERNAL EXPOSURE DURING PREGNANCY    | 10071408 | 1196 |
| INFLUENZA                             | 10022000 | 1191 |
| THIRST                                | 10043458 | 1184 |
| SARS-COV-2 ANTIBODY TEST              | 10084501 | 1172 |
| FEELING OF BODY TEMPERATURE CHANGE    | 10061458 | 1166 |
| TROPONIN                              | 10061576 | 1166 |
| HEAD INJURY                           | 10019196 | 1158 |
| ULTRASOUND DOPPLER                    | 10045412 | 1155 |
| DYSPNOEA EXERTIONAL                   | 10013971 | 1130 |
| SENSITIVE SKIN                        | 10081765 | 1119 |
| BLOOD THYROID STIMULATING HORMONE     | 10005829 | 1111 |
| PAROSMIA                              | 10034018 | 1099 |
| AMNESIA                               | 10001949 | 1096 |
| MUSCULOSKELETAL DISCOMFORT            | 10053156 | 1088 |
| JOINT STIFFNESS                       | 10023230 | 1086 |
| DYSARTHRIA                            | 10013887 | 1083 |
| HAEMOGLOBIN DECREASED                 | 10018884 | 1076 |
| INJECTION SITE NODULE                 | 10057880 | 1074 |
| SINUS CONGESTION                      | 10040742 | 1067 |
| COMPUTERISED TOMOGRAM THORAX ABNORMAL | 10057799 | 1064 |
| DEPRESSION                            | 10012378 | 1053 |

|                                           |          |      |
|-------------------------------------------|----------|------|
| MUSCULOSKELETAL CHEST PAIN                | 10050819 | 1053 |
| HYPOACUSIS                                | 10048865 | 1051 |
| PANIC ATTACK                              | 10033664 | 1049 |
| COMPUTERISED TOMOGRAM THORAX              | 10053875 | 1049 |
| LACRIMATION INCREASED                     | 10023644 | 1044 |
| NEUROPATHY PERIPHERAL                     | 10029331 | 1043 |
| ACUTE KIDNEY INJURY                       | 10069339 | 1042 |
| MASS                                      | 10026865 | 1038 |
| PLATELET COUNT DECREASED                  | 10035528 | 1025 |
| SWELLING OF EYELID                        | 10042690 | 1025 |
| CARDIAC FLUTTER                           | 10052840 | 1011 |
| MAGNETIC RESONANCE IMAGING NORMAL         | 10078225 | 1002 |
| CARDIAC STRESS TEST                       | 10061027 | 997  |
| SENSORY DISTURBANCE                       | 10040026 | 994  |
| INFLUENZA VIRUS TEST NEGATIVE             | 10070718 | 989  |
| BLOOD PRESSURE DECREASED                  | 10005734 | 984  |
| ECHOCARDIOGRAM NORMAL                     | 10014115 | 984  |
| IMPAIRED DRIVING ABILITY                  | 10049564 | 984  |
| INVESTIGATION                             | 10062026 | 984  |
| SENSATION OF FOREIGN BODY                 | 10061549 | 982  |
| DEAFNESS                                  | 10011878 | 980  |
| CARDIAC MONITORING                        | 10053438 | 980  |
| RHEUMATOID ARTHRITIS                      | 10039073 | 976  |
| BLOOD GLUCOSE                             | 10005553 | 974  |
| COMPUTERISED TOMOGRAM ABNORMAL            | 10010235 | 972  |
| DYSKINESIA                                | 10013916 | 965  |
| EYE IRRITATION                            | 10015946 | 961  |
| VITAL SIGNS MEASUREMENT                   | 10072952 | 961  |
| BIOPSY                                    | 10004720 | 959  |
| ENDOTRACHEAL INTUBATION                   | 10067450 | 950  |
| INJECTION SITE INFLAMMATION               | 10022078 | 945  |
| MENTAL STATUS CHANGES                     | 10048294 | 939  |
| CRYING                                    | 10011469 | 933  |
| COMPUTERISED TOMOGRAM HEAD NORMAL         | 10072167 | 922  |
| TROPONIN INCREASED                        | 10058267 | 922  |
| SKIN EXFOLIATION                          | 10040844 | 917  |
| URINE ANALYSIS NORMAL                     | 10061578 | 913  |
| HAEMORRHAGE                               | 10055798 | 904  |
| CONSTIPATION                              | 10010774 | 897  |
| INCORRECT ROUTE OF PRODUCT ADMINISTRATION | 10081202 | 891  |
| C-REACTIVE PROTEIN                        | 10006824 | 887  |
| LUNG OPACITY                              | 10081792 | 882  |
| ANGIOGRAM                                 | 10061637 | 872  |

|                                          |          |     |
|------------------------------------------|----------|-----|
| MAGNETIC RESONANCE IMAGING HEAD NORMAL   | 10085257 | 862 |
| DIFFERENTIAL WHITE BLOOD CELL COUNT      | 10012784 | 857 |
| AMENORRHOEA                              | 10001928 | 852 |
| PARANASAL SINUS DISCOMFORT               | 10052438 | 848 |
| TOOTHACHE                                | 10044055 | 841 |
| PHARYNGEAL PARAESTHESIA                  | 10076737 | 834 |
| LABORATORY TEST ABNORMAL                 | 10023547 | 831 |
| METABOLIC FUNCTION TEST NORMAL           | 10062192 | 827 |
| MOUTH SWELLING                           | 10075203 | 812 |
| MAGNETIC RESONANCE IMAGING HEAD ABNORMAL | 10085256 | 811 |
| PLATELET COUNT NORMAL                    | 10035530 | 810 |
| ECHOCARDIOGRAM ABNORMAL                  | 10061593 | 802 |
| BREAST SWELLING                          | 10006312 | 798 |
| DRY SKIN                                 | 10013786 | 795 |
| DRY THROAT                               | 10013789 | 790 |
| ASYMPTOMATIC COVID-19                    | 10084459 | 789 |
| OXYGEN SATURATION                        | 10033316 | 787 |
| PERICARDITIS                             | 10034484 | 787 |
| GASTROESOPHAGEAL REFLUX DISEASE          | 10017885 | 771 |
| INFECTION                                | 10021789 | 770 |
| POLYMENORRHOEA                           | 10036086 | 767 |
| ELECTROCARDIOGRAM AMBULATORY             | 10014368 | 765 |
| STOMATITIS                               | 10042128 | 764 |
| AXILLARY MASS                            | 10049021 | 763 |
| SEPSIS                                   | 10040047 | 760 |
| ELECTRIC SHOCK SENSATION                 | 10014358 | 759 |
| BLINDNESS                                | 10005169 | 756 |
| OCULAR DISCOMFORT                        | 10052143 | 755 |
| CARDIAC DISORDER                         | 10061024 | 748 |
| HEART RATE DECREASED                     | 10019301 | 747 |
| FEAR                                     | 10016275 | 744 |
| MYOCARDITIS                              | 10028606 | 744 |
| BLOOD CREATININE INCREASED               | 10005483 | 741 |
| STREPTOCOCCUS TEST NEGATIVE              | 10070415 | 741 |
| MYOCARDIAL INFARCTION                    | 10028596 | 739 |
| ORAL DISCOMFORT                          | 10030973 | 731 |
| ULTRASOUND SCAN NORMAL                   | 10061607 | 730 |
| TROPONIN NORMAL                          | 10071322 | 729 |
| ANGIOEDEMA                               | 10002424 | 728 |
| PREGNANCY TEST                           | 10036572 | 728 |
| RESTLESSNESS                             | 10038743 | 724 |
| DEAFNESS UNILATERAL                      | 10048812 | 721 |
| ANAEMIA                                  | 10002034 | 720 |



|                                            |          |     |
|--------------------------------------------|----------|-----|
| WEIGHT                                     | 10047890 | 719 |
| DIPLOPIA                                   | 10013036 | 717 |
| ANGINA PECTORIS                            | 10002383 | 715 |
| ARRHYTHMIA                                 | 10003119 | 711 |
| ACOUSTIC STIMULATION TESTS                 | 10000525 | 704 |
| IMMUNISATION REACTION                      | 10021432 | 700 |
| BEDRIDDEN                                  | 10048948 | 700 |
| FLATULENCE                                 | 10016766 | 699 |
| URINARY INCONTINENCE                       | 10046543 | 693 |
| ABDOMINAL PAIN LOWER                       | 10000084 | 686 |
| ULTRASOUND SCAN ABNORMAL                   | 10061606 | 684 |
| COMPUTERISED TOMOGRAM ABDOMEN              | 10053876 | 683 |
| ULTRASOUND DOPPLER ABNORMAL                | 10045413 | 681 |
| VENTRICULAR EXTRASYSTOLES                  | 10047289 | 681 |
| SCAN WITH CONTRAST                         | 10059696 | 680 |
| OLIGOMENORRHOEA                            | 10030295 | 675 |
| GENERAL PHYSICAL HEALTH DETERIORATION      | 10049438 | 674 |
| PRODUCT ADMINISTERED AT INAPPROPRIATE SITE | 10080753 | 674 |
| SKIN REACTION                              | 10040914 | 672 |
| MAMMOGRAM                                  | 10026735 | 667 |
| GASTROINTESTINAL DISORDER                  | 10017944 | 666 |
| HYPOKINESIA                                | 10021021 | 665 |
| POLLAKIURIA                                | 10036018 | 665 |
| HYPOPHAGIA                                 | 10063743 | 664 |
| SYRINGE ISSUE                              | 10069218 | 657 |
| HALLUCINATION                              | 10019063 | 655 |
| ADVERSE REACTION                           | 10067484 | 653 |
| PRODUCT ADMINISTRATION ERROR               | 10081576 | 652 |
| SKIN LESION                                | 10040882 | 649 |
| SPINAL PAIN                                | 10072005 | 649 |
| COGNITIVE DISORDER                         | 10057668 | 646 |
| ANTIBODY TEST                              | 10060979 | 645 |
| WHITE BLOOD CELL COUNT NORMAL              | 10047944 | 644 |
| SKIN SWELLING                              | 10053262 | 640 |
| POSTMENOPAUSAL HAEMORRHAGE                 | 10055870 | 632 |
| COMPUTERISED TOMOGRAM ABDOMEN ABNORMAL     | 10057798 | 627 |
| MAGNETIC RESONANCE IMAGING ABNORMAL        | 10078224 | 625 |
| CARDIAC ARREST                             | 10007515 | 622 |
| COMPUTERISED TOMOGRAM HEAD ABNORMAL        | 10072168 | 622 |
| MECHANICAL URTICARIA                       | 10068773 | 620 |
| BLOOD POTASSIUM DECREASED                  | 10005724 | 617 |
| HEMIPARESIS                                | 10019465 | 617 |
| INFLUENZA B VIRUS TEST                     | 10071544 | 617 |

|                                             |          |     |
|---------------------------------------------|----------|-----|
| RED BLOOD CELL SEDIMENTATION RATE INCREASED | 10049187 | 610 |
| NEUROLOGICAL SYMPTOM                        | 10060860 | 610 |
| PERIORBITAL SWELLING                        | 10056647 | 609 |
| PRODUCT USE ISSUE                           | 10076309 | 608 |
| IRRITABILITY                                | 10022998 | 606 |
| ORAL PAIN                                   | 10031009 | 604 |
| RESPIRATORY FAILURE                         | 10038695 | 603 |
| DIZZINESS POSTURAL                          | 10013578 | 601 |
| PLEURAL EFFUSION                            | 10035598 | 601 |
| X-RAY NORMAL                                | 10048067 | 601 |
| HAEMOGLOBIN NORMAL                          | 10018890 | 600 |
| BRONCHITIS                                  | 10006451 | 597 |
| RED BLOOD CELL SEDIMENTATION RATE           | 10049184 | 596 |
| UPPER-AIRWAY COUGH SYNDROME                 | 10070488 | 593 |
| PAINFUL RESPIRATION                         | 10033517 | 588 |
| PRODUCT PREPARATION ERROR                   | 10076869 | 588 |
| ANTINUCLEAR ANTIBODY                        | 10002807 | 584 |
| ECZEMA                                      | 10014184 | 583 |
| BLOOD CREATININE NORMAL                     | 10005484 | 582 |
| RED BLOOD CELL SEDIMENTATION RATE NORMAL    | 10049408 | 582 |
| BREAST TENDERNESS                           | 10006313 | 580 |
| FEELING JITTERY                             | 10016338 | 579 |
| INJECTION SITE HYPOAESTHESIA                | 10074586 | 579 |
| PETECHIAE                                   | 10034754 | 578 |
| SLUGGISHNESS                                | 10041052 | 578 |
| MUSCULOSKELETAL PAIN                        | 10028391 | 576 |
| ANGIOGRAM PULMONARY ABNORMAL                | 10002441 | 573 |
| WHITE BLOOD CELL COUNT                      | 10047939 | 566 |
| EYE MOVEMENT DISORDER                       | 10061129 | 565 |
| URINE ANALYSIS ABNORMAL                     | 10062226 | 563 |
| HYPERACUSIS                                 | 10020559 | 560 |
| SINUS DISORDER                              | 10062244 | 558 |
| BLOOD URINE PRESENT                         | 10018870 | 556 |
| LUMBAR PUNCTURE                             | 10024999 | 555 |
| WHITE BLOOD CELL COUNT DECREASED            | 10047942 | 555 |
| PSORIASIS                                   | 10037153 | 554 |
| HYPERVENTILATION                            | 10020910 | 553 |
| TONGUE DISCOMFORT                           | 10077855 | 552 |
| ADVERSE EVENT                               | 10060933 | 552 |
| DRY EYE                                     | 10013774 | 548 |
| THERAPEUTIC RESPONSE UNEXPECTED             | 10043417 | 548 |
| APHONIA                                     | 10002953 | 546 |
| LUNG INFILTRATION                           | 10025102 | 543 |

|                                          |          |     |
|------------------------------------------|----------|-----|
| INJECTION SITE DISCOMFORT                | 10054266 | 540 |
| VACCINATION SITE BRUISING                | 10069484 | 536 |
| WEIGHT INCREASED                         | 10047899 | 533 |
| INJECTION SITE PARAESTHESIA              | 10022088 | 531 |
| MENTAL IMPAIRMENT                        | 10027374 | 530 |
| SKIN IRRITATION                          | 10040880 | 530 |
| FLANK PAIN                               | 10016750 | 529 |
| BLOOD SODIUM DECREASED                   | 10005802 | 526 |
| RASH VESICULAR                           | 10037898 | 524 |
| BLEPHAROSPASM                            | 10005159 | 523 |
| INJECTION SITE DISCOLOURATION            | 10051572 | 522 |
| C-REACTIVE PROTEIN NORMAL                | 10006826 | 521 |
| PLATELET COUNT                           | 10035525 | 520 |
| BLOOD POTASSIUM NORMAL                   | 10005726 | 519 |
| INFLUENZA A VIRUS TEST NEGATIVE          | 10070417 | 509 |
| ASPARTATE AMINOTRANSFERASE INCREASED     | 10003481 | 505 |
| SKIN TIGHTNESS                           | 10050637 | 504 |
| ALANINE AMINOTRANSFERASE INCREASED       | 10001551 | 500 |
| RENAL PAIN                               | 10038490 | 496 |
| GLOSSODYNIA                              | 10018388 | 495 |
| HYPERAESTHESIA                           | 10020568 | 495 |
| BREAST MASS                              | 10006272 | 494 |
| TONGUE DISORDER                          | 10043951 | 494 |
| ELECTROENCEPHALOGRAM                     | 10014407 | 493 |
| BLOOD THYROID STIMULATING HORMONE NORMAL | 10005834 | 488 |
| DYSURIA                                  | 10013990 | 487 |
| APPENDICITIS                             | 10003011 | 482 |
| BLOOD SODIUM NORMAL                      | 10005804 | 478 |
| STRESS                                   | 10042209 | 478 |
| TRANSIENT ISCHAEMIC ATTACK               | 10044390 | 478 |
| LUNG DISORDER                            | 10025082 | 476 |
| AUTOIMMUNE DISORDER                      | 10061664 | 476 |
| OEDEMA                                   | 10030095 | 475 |
| CHRONIC OBSTRUCTIVE PULMONARY DISEASE    | 10009033 | 468 |
| EAR SWELLING                             | 10014025 | 467 |
| EYE DISORDER                             | 10015916 | 467 |
| SINUS TACHYCARDIA                        | 10040752 | 462 |
| LIMB INJURY                              | 10061225 | 459 |
| SINUS PAIN                               | 10040747 | 458 |
| SECRETION DISCHARGE                      | 10053459 | 454 |
| BLOOD LACTIC ACID                        | 10005632 | 452 |
| GUILLAIN-BARRE SYNDROME                  | 10018767 | 449 |
| BRADYCARDIA                              | 10006093 | 448 |

|                                  |          |     |
|----------------------------------|----------|-----|
| ORAL PRURITUS                    | 10052894 | 448 |
| PULMONARY THROMBOSIS             | 10037437 | 446 |
| THROMBOCYTOPENIA                 | 10043554 | 446 |
| COLONOSCOPY                      | 10010007 | 445 |
| PARALYSIS                        | 10033799 | 445 |
| PELVIC PAIN                      | 10034263 | 445 |
| TONGUE PRURITUS                  | 10070072 | 445 |
| HAEMATOCRIT NORMAL               | 10018842 | 444 |
| RESPIRATORY DISTRESS             | 10038687 | 444 |
| PERICARDIAL EFFUSION             | 10034474 | 443 |
| PHYSICAL EXAMINATION             | 10034986 | 443 |
| EXERCISE TOLERANCE DECREASED     | 10051301 | 443 |
| INJECTION SITE HAEMORRHAGE       | 10022067 | 441 |
| ULTRASOUND ABDOMEN               | 10052038 | 441 |
| TACHYPNOEA                       | 10043089 | 439 |
| CARDIAC FAILURE CONGESTIVE       | 10007559 | 438 |
| VITREOUS FLOATERS                | 10047654 | 436 |
| WALKING AID USER                 | 10050778 | 435 |
| DEPRESSED MOOD                   | 10012374 | 434 |
| ACUTE MYOCARDIAL INFARCTION      | 10000891 | 432 |
| GRIP STRENGTH DECREASED          | 10062556 | 431 |
| BLOOD UREA INCREASED             | 10005851 | 430 |
| POOR QUALITY SLEEP               | 10062519 | 430 |
| CARDIOMEGALY                     | 10007632 | 429 |
| POSITIVE AIRWAY PRESSURE THERAPY | 10086397 | 429 |
| FIBROMYALGIA                     | 10048439 | 428 |
| MUSCLE FATIGUE                   | 10049565 | 428 |
| CYANOSIS                         | 10011703 | 427 |
| EAR INFECTION                    | 10014011 | 426 |
| HAEMATOCRIT DECREASED            | 10018838 | 426 |
| EXTRASYSTOLES                    | 10015856 | 425 |
| PREGNANCY TEST NEGATIVE          | 10036574 | 425 |
| SENSORY LOSS                     | 10040030 | 423 |
| PULMONARY PAIN                   | 10074693 | 423 |
| AGITATION                        | 10001497 | 422 |
| ELECTROMYOGRAM                   | 10014430 | 420 |
| FIBRIN D DIMER NORMAL            | 10016583 | 420 |
| BLOOD GLUCOSE DECREASED          | 10005555 | 419 |
| PHARYNGEAL HYPOAESTHESIA         | 10059923 | 419 |
| THYROID FUNCTION TEST            | 10043729 | 418 |
| MECHANICAL VENTILATION           | 10067221 | 416 |
| FULL BLOOD COUNT ABNORMAL        | 10017412 | 408 |
| HAEMATOCHESIA                    | 10018836 | 404 |

|                                     |          |     |
|-------------------------------------|----------|-----|
| IMMUNODEFICIENCY                    | 10061598 | 403 |
| BLOOD MAGNESIUM                     | 10005651 | 398 |
| ULTRASOUND DOPPLER NORMAL           | 10045414 | 397 |
| BLOOD PRESSURE ABNORMAL             | 10005728 | 393 |
| HYPOPNOEA                           | 10021079 | 392 |
| SKIN DISORDER                       | 10040831 | 391 |
| PERIARTHRITIS                       | 10034464 | 390 |
| SUPRAVENTRICULAR TACHYCARDIA        | 10042604 | 389 |
| OPHTHALMOLOGICAL EXAMINATION        | 10050320 | 388 |
| ABNORMAL DREAMS                     | 10000125 | 386 |
| CHROMATURIA                         | 10008796 | 384 |
| BLOOD CHLORIDE NORMAL               | 10005421 | 383 |
| PULMONARY CONGESTION                | 10037368 | 382 |
| INFLUENZA VIRUS TEST                | 10070715 | 381 |
| BIOPSY SKIN                         | 10004873 | 380 |
| THINKING ABNORMAL                   | 10043431 | 380 |
| ATELECTASIS                         | 10003598 | 379 |
| DERMATITIS                          | 10012431 | 379 |
| SCAN WITH CONTRAST ABNORMAL         | 10062152 | 379 |
| HEART RATE ABNORMAL                 | 10019300 | 376 |
| PULMONARY OEDEMA                    | 10037423 | 375 |
| CULTURE URINE                       | 10011638 | 374 |
| INJECTION SITE CELLULITIS           | 10050057 | 372 |
| ACNE                                | 10000496 | 371 |
| RESPIRATORY RATE INCREASED          | 10038712 | 370 |
| SCIATICA                            | 10039674 | 370 |
| SURGERY                             | 10042609 | 369 |
| MEAN CELL VOLUME NORMAL             | 10027006 | 368 |
| ANTINUCLEAR ANTIBODY POSITIVE       | 10060055 | 366 |
| FORMICATION                         | 10017062 | 365 |
| RESUSCITATION                       | 10038749 | 365 |
| ACOUSTIC STIMULATION TESTS ABNORMAL | 10000526 | 364 |
| ALANINE AMINOTRANSFERASE NORMAL     | 10001552 | 364 |
| BLOOD UREA NORMAL                   | 10005857 | 363 |
| BODY TEMPERATURE DECREASED          | 10005910 | 363 |
| THROAT CLEARING                     | 10080125 | 362 |
| HEPATIC ENZYME INCREASED            | 10060795 | 362 |
| NIGHTMARE                           | 10029412 | 360 |
| IMMUNOGLOBULIN THERAPY              | 10069534 | 360 |
| BRAIN NATRIURETIC PEPTIDE INCREASED | 10053405 | 360 |
| BLOOD ALKALINE PHOSPHATASE NORMAL   | 10005310 | 357 |
| MAGNETIC RESONANCE IMAGING NECK     | 10083140 | 357 |
| ALLERGY TEST                        | 10053462 | 355 |

|                                           |          |     |
|-------------------------------------------|----------|-----|
| DELIRIUM                                  | 10012218 | 353 |
| EMOTIONAL DISTRESS                        | 10049119 | 353 |
| POLYMERASE CHAIN REACTION                 | 10050967 | 353 |
| EATING DISORDER                           | 10014062 | 352 |
| GLYCOSYLATED HAEMOGLOBIN                  | 10018480 | 351 |
| VACCINATION SITE URTICARIA                | 10069622 | 350 |
| NERVOUS SYSTEM DISORDER                   | 10029202 | 349 |
| NEUROLOGICAL EXAMINATION                  | 10050318 | 346 |
| RESPIRATORY SYNCYTIAL VIRUS TEST NEGATIVE | 10068564 | 346 |
| COMPUTERISED TOMOGRAM NECK                | 10082961 | 346 |
| INTERNATIONAL NORMALISED RATIO            | 10022591 | 345 |
| X-RAY LIMB                                | 10061585 | 345 |
| BLOOD CULTURE                             | 10005485 | 344 |
| RED BLOOD CELL COUNT DECREASED            | 10038153 | 344 |
| GROIN PAIN                                | 10018735 | 343 |
| PHOTOPSIA                                 | 10034962 | 342 |
| DELIVERY                                  | 10067647 | 342 |
| LIP PRURITUS                              | 10070721 | 342 |
| BURSITIS                                  | 10006811 | 341 |
| HYPONATRAEMIA                             | 10021036 | 340 |
| ANION GAP                                 | 10002522 | 339 |
| INCOMPLETE COURSE OF VACCINATION          | 10072103 | 337 |
| VACCINATION SITE DISCOLOURATION           | 10069474 | 336 |
| LIMB MASS                                 | 10078503 | 336 |
| LYMPHADENITIS                             | 10025188 | 335 |
| ORAL MUCOSAL BLISTERING                   | 10030995 | 335 |
| SCAB                                      | 10039509 | 335 |
| APPENDICECTOMY                            | 10003010 | 334 |
| ASTHENOPIA                                | 10003552 | 333 |
| BLOOD MAGNESIUM NORMAL                    | 10005656 | 331 |
| BLOOD PRESSURE FLUCTUATION                | 10005746 | 331 |
| STREPTOCOCCUS TEST                        | 10070414 | 330 |
| GASTROINTESTINAL PAIN                     | 10017999 | 328 |
| VACCINATION SITE MOVEMENT IMPAIRMENT      | 10076183 | 327 |
| SINUS HEADACHE                            | 10040744 | 326 |
| LIVER FUNCTION TEST                       | 10060105 | 325 |
| HAEMOGLOBIN                               | 10018876 | 323 |
| ALLERGY TO VACCINE                        | 10055048 | 323 |
| PROTHROMBIN TIME                          | 10037056 | 322 |
| TRANSFUSION                               | 10066152 | 319 |
| SKIN MASS                                 | 10067868 | 317 |
| VITAMIN D                                 | 10050713 | 316 |
| BLOOD BILIRUBIN NORMAL                    | 10005367 | 313 |

|                                            |          |     |
|--------------------------------------------|----------|-----|
| MATERNAL EXPOSURE DURING BREAST FEEDING    | 10080752 | 311 |
| ASPARTATE AMINOTRANSFERASE NORMAL          | 10003482 | 309 |
| RESPIRATORY DISORDER                       | 10038683 | 309 |
| SEIZURE LIKE PHENOMENA                     | 10071048 | 308 |
| POST-ACUTE COVID-19 SYNDROME               | 10085503 | 308 |
| RED BLOOD CELL COUNT NORMAL                | 10038157 | 307 |
| TENSION HEADACHE                           | 10043269 | 307 |
| THYROID FUNCTION TEST NORMAL               | 10043731 | 307 |
| ANTINUCLEAR ANTIBODY NEGATIVE              | 10002809 | 305 |
| ENDOSCOPY                                  | 10014805 | 305 |
| NASAL DISCOMFORT                           | 10052437 | 305 |
| GINGIVAL PAIN                              | 10018286 | 304 |
| CARDIAC FAILURE                            | 10007554 | 303 |
| GLOMERULAR FILTRATION RATE DECREASED       | 10018358 | 303 |
| COMPUTERISED TOMOGRAM THORAX NORMAL        | 10057801 | 303 |
| MOUTH ULCERATION                           | 10028034 | 301 |
| FLUID RETENTION                            | 10016807 | 298 |
| LYMPHOEDEMA                                | 10025282 | 298 |
| WRONG TECHNIQUE IN PRODUCT USAGE PROCESS   | 10076573 | 298 |
| MEAN CELL HAEMOGLOBIN CONCENTRATION NORMAL | 10026994 | 294 |
| HYPOKALAEMIA                               | 10021015 | 293 |
| NERVE INJURY                               | 10052897 | 293 |
| APHTHOUS ULCER                             | 10002959 | 292 |
| CATHETERISATION CARDIAC                    | 10007815 | 292 |
| DISEASE RECURRENCE                         | 10061819 | 292 |
| CEREBRAL HAEMORRHAGE                       | 10008111 | 290 |
| EYE HAEMORRHAGE                            | 10015926 | 290 |
| FEELING DRUNK                              | 10016330 | 290 |
| TUNNEL VISION                              | 10045178 | 290 |
| FACIAL PARESIS                             | 10051267 | 290 |
| LEUKOCYTOSIS                               | 10024378 | 289 |
| BLOOD CULTURE NEGATIVE                     | 10005486 | 288 |
| INJECTION SITE VESICLES                    | 10022111 | 288 |
| RESPIRATION ABNORMAL                       | 10038647 | 288 |
| BLOOD CREATINE PHOSPHOKINASE               | 10005467 | 287 |
| COLITIS                                    | 10009887 | 287 |
| HAEMOPTYSIS                                | 10018964 | 287 |
| SYSTEMIC LUPUS ERYTHEMATOSUS               | 10042945 | 287 |
| UPPER RESPIRATORY TRACT INFECTION          | 10046306 | 287 |
| RED CELL DISTRIBUTION WIDTH NORMAL         | 10053922 | 287 |
| SCRATCH                                    | 10039737 | 285 |
| ACCIDENTAL UNDERDOSE                       | 10074904 | 285 |
| ERUCTATION                                 | 10015137 | 284 |

|                                            |          |     |
|--------------------------------------------|----------|-----|
| MATERNAL EXPOSURE BEFORE PREGNANCY         | 10071406 | 284 |
| ULTRASOUND SCAN VAGINA                     | 10045438 | 281 |
| PULMONARY MASS                             | 10056342 | 280 |
| PREGNANCY                                  | 10036556 | 279 |
| IMMUNE SYSTEM DISORDER                     | 10021425 | 278 |
| RHEUMATOID FACTOR                          | 10039079 | 278 |
| NEPHROLITHIASIS                            | 10029148 | 277 |
| SARS-COV-2 ANTIBODY TEST NEGATIVE          | 10084509 | 276 |
| ACCIDENTAL OVERDOSE                        | 10000381 | 275 |
| DIFFERENTIAL WHITE BLOOD CELL COUNT NORMAL | 10012787 | 275 |
| NECK MASS                                  | 10049146 | 275 |
| RESPIRATORY SYMPTOM                        | 10075535 | 274 |
| LOCAL REACTION                             | 10024769 | 273 |
| GENERALISED TONIC-CLONIC SEIZURE           | 10018100 | 272 |
| JOINT INJURY                               | 10060820 | 272 |
| ADVERSE DRUG REACTION                      | 10061623 | 272 |
| ARTHROPATHY                                | 10003285 | 271 |
| ACTIVATED PARTIAL THROMBOPLASTIN TIME      | 10000630 | 270 |
| INJECTION SITE IRRITATION                  | 10022079 | 270 |
| TROPONIN I                                 | 10050397 | 270 |
| PLATELET COUNT INCREASED                   | 10051608 | 270 |
| FACIAL DISCOMFORT                          | 10083537 | 270 |
| CARBON DIOXIDE NORMAL                      | 10007228 | 269 |
| CYSTITIS                                   | 10011781 | 269 |
| VACCINATION SITE DISCOMFORT                | 10069478 | 268 |
| BLOOD CALCIUM NORMAL                       | 10005397 | 267 |
| VITAMIN B12                                | 10047602 | 267 |
| PROTEIN TOTAL NORMAL                       | 10037017 | 266 |
| X-RAY ABNORMAL                             | 10048065 | 266 |
| EAR CONGESTION                             | 10052136 | 266 |
| BLOOD ALKALINE PHOSPHATASE INCREASED       | 10059570 | 266 |
| PULMONARY FUNCTION TEST                    | 10059914 | 264 |
| DEVICE CONNECTION ISSUE                    | 10065066 | 264 |
| BLINDNESS UNILATERAL                       | 10005186 | 263 |
| FAECES DISCOLOURED                         | 10016100 | 263 |
| HAEMATURIA                                 | 10018867 | 263 |
| OVERDOSE                                   | 10033295 | 263 |
| LIP BLISTER                                | 10049307 | 263 |
| DEPRESSED LEVEL OF CONSCIOUSNESS           | 10012373 | 262 |
| TENDONITIS                                 | 10043255 | 262 |
| MAGNETIC RESONANCE IMAGING SPINAL          | 10083133 | 261 |
| ODYNOPHAGIA                                | 10030094 | 259 |
| SARS-COV-2 ANTIBODY TEST POSITIVE          | 10084491 | 259 |



|                                                     |          |     |
|-----------------------------------------------------|----------|-----|
| ENCEPHALOPATHY                                      | 10014625 | 258 |
| BLOOD CALCIUM DECREASED                             | 10005395 | 257 |
| MAMMOGRAM ABNORMAL                                  | 10026736 | 257 |
| SCAR                                                | 10039580 | 256 |
| RESTLESS LEGS SYNDROME                              | 10058920 | 256 |
| BLOOD THYROID STIMULATING HORMONE DECREASED         | 10005832 | 255 |
| DIVERTICULITIS                                      | 10013538 | 255 |
| OSTEOARTHRITIS                                      | 10031161 | 255 |
| CHEILITIS                                           | 10008417 | 254 |
| HUMAN CHORIONIC GONADOTROPIN                        | 10071325 | 254 |
| SCAN                                                | 10061498 | 254 |
| HERPES SIMPLEX                                      | 10019948 | 253 |
| MEAN CELL HAEMOGLOBIN NORMAL                        | 10026997 | 253 |
| RECTAL HAEMORRHAGE                                  | 10038063 | 253 |
| RENAL FAILURE                                       | 10038435 | 253 |
| RENAL IMPAIRMENT                                    | 10062237 | 253 |
| SUICIDAL IDEATION                                   | 10042458 | 252 |
| COORDINATION ABNORMAL                               | 10010947 | 251 |
| PROCALCITONIN                                       | 10064051 | 251 |
| DRUG HYPERSENSITIVITY                               | 10013700 | 249 |
| LYMPHOCYTE PERCENTAGE DECREASED                     | 10052231 | 249 |
| MONOCYTE PERCENTAGE                                 | 10059473 | 249 |
| SHOULDER INJURY RELATED TO VACCINE ADMINISTRATION   | 10081038 | 247 |
| POSTURAL ORTHOSTATIC TACHYCARDIA SYNDROME           | 10063080 | 247 |
| LIP PAIN                                            | 10024561 | 245 |
| PAIN ASSESSMENT                                     | 10050533 | 244 |
| IMMUNE THROMBOCYTOPENIA                             | 10083842 | 244 |
| MYDRIASIS                                           | 10028521 | 243 |
| NEUTROPHIL PERCENTAGE INCREASED                     | 10052224 | 243 |
| INCONTINENCE                                        | 10021639 | 242 |
| VACCINATION SITE HAEMORRHAGE                        | 10069475 | 242 |
| LIPASE                                              | 10050659 | 241 |
| CIRCUMSTANCE OR INFORMATION CAPABLE OF LEADING TO M | 10064385 | 240 |
| EAR PRURITUS                                        | 10052138 | 239 |
| BLOOD ALBUMIN DECREASED                             | 10005287 | 238 |
| VACCINATION SITE INFLAMMATION                       | 10068878 | 237 |
| RESPIRATORY VIRAL PANEL                             | 10075165 | 237 |
| NEUTROPHIL COUNT                                    | 10029363 | 236 |
| BIOPSY SKIN ABNORMAL                                | 10004874 | 235 |
| MUSCLE STRAIN                                       | 10050031 | 235 |
| CARDIAC DISCOMFORT                                  | 10054211 | 233 |
| DIABETES MELLITUS                                   | 10012601 | 232 |
| INTERNATIONAL NORMALISED RATIO NORMAL               | 10022596 | 232 |

|                                          |          |     |
|------------------------------------------|----------|-----|
| BLOOD CHOLESTEROL                        | 10005422 | 230 |
| RHEUMATOID FACTOR NEGATIVE               | 10048574 | 230 |
| MAGNETIC RESONANCE IMAGING HEART         | 10083127 | 230 |
| FUNGAL INFECTION                         | 10017533 | 229 |
| INFLAMMATORY MARKER INCREASED            | 10069826 | 229 |
| HYPOTHYROIDISM                           | 10021114 | 228 |
| LIPIDS                                   | 10024587 | 228 |
| SCAN WITH CONTRAST NORMAL                | 10062153 | 228 |
| VIRAL INFECTION                          | 10047461 | 227 |
| UTERINE DILATION AND CURETTAGE           | 10057304 | 227 |
| IMAGING PROCEDURE                        | 10068979 | 226 |
| ISCHAEMIC STROKE                         | 10061256 | 226 |
| MICTURITION URGENCY                      | 10027566 | 225 |
| CARDIAC STRESS TEST NORMAL               | 10055063 | 225 |
| BLOOD CREATININE                         | 10005480 | 224 |
| BODY HEIGHT                              | 10005891 | 224 |
| CONJUNCTIVITIS                           | 10010741 | 224 |
| MONOPLÉGIA                               | 10027926 | 224 |
| NEUTROPHIL COUNT INCREASED               | 10029368 | 224 |
| BLOOD ALBUMIN NORMAL                     | 10005289 | 223 |
| BLOOD CHOLESTEROL INCREASED              | 10005425 | 223 |
| INTERNATIONAL NORMALISED RATIO INCREASED | 10022595 | 223 |
| PANIC REACTION                           | 10033670 | 222 |
| VERTIGO POSITIONAL                       | 10047348 | 222 |
| ANAL INCONTINENCE                        | 10077605 | 222 |
| CULTURE                                  | 10061447 | 222 |
| GLOMERULAR FILTRATION RATE               | 10018355 | 221 |
| VITAMIN B12 NORMAL                       | 10047611 | 221 |
| BRAIN NATRIURETIC PEPTIDE                | 10053406 | 221 |
| HAEMATOMA                                | 10018852 | 219 |
| PHOTOSENSITIVITY REACTION                | 10034972 | 219 |
| GLOMERULAR FILTRATION RATE NORMAL        | 10018361 | 217 |
| HYPERGLYCAEMIA                           | 10020635 | 217 |
| SUDDEN HEARING LOSS                      | 10061373 | 216 |
| EJECTION FRACTION DECREASED              | 10050528 | 215 |
| NERVE CONDUCTION STUDIES                 | 10053318 | 215 |
| BLOOD IMMUNOGLOBULIN G                   | 10005593 | 214 |
| BLOOD IRON DECREASED                     | 10005619 | 214 |
| EMOTIONAL DISORDER                       | 10014551 | 214 |
| GASTROINTESTINAL HAEMORRHAGE             | 10017955 | 214 |
| ELECTROENCEPHALOGRAM NORMAL              | 10014409 | 213 |
| GINGIVAL SWELLING                        | 10018291 | 213 |
| RASH MACULO-PAPULAR                      | 10037868 | 213 |

|                                            |          |     |
|--------------------------------------------|----------|-----|
| BLOOD GASES                                | 10005537 | 212 |
| HYPERTHYROIDISM                            | 10020850 | 212 |
| GASTRITIS                                  | 10017853 | 211 |
| CROHN'S DISEASE                            | 10011401 | 210 |
| PITYRIASIS ROSEA                           | 10035114 | 210 |
| POSTURE ABNORMAL                           | 10036436 | 210 |
| TEMPERATURE INTOLERANCE                    | 10057040 | 210 |
| MOTOR DYSFUNCTION                          | 10061296 | 210 |
| SINUS OPERATION                            | 10062245 | 210 |
| MULTIPLE SCLEROSIS                         | 10028245 | 209 |
| MUSCLE CONTRACTIONS INVOLUNTARY            | 10028293 | 209 |
| MAGNETIC RESONANCE IMAGING SPINAL ABNORMAL | 10083139 | 209 |
| LIVER FUNCTION TEST NORMAL                 | 10060106 | 209 |
| ABNORMAL BEHAVIOUR                         | 10061422 | 209 |
| BLOOD CREATINE PHOSPHOKINASE NORMAL        | 10005479 | 208 |
| CULTURE URINE NEGATIVE                     | 10011639 | 208 |
| GINGIVAL BLEEDING                          | 10018276 | 208 |
| SALIVARY HYPERSECRETION                    | 10039424 | 208 |
| HERPES VIRUS INFECTION                     | 10019973 | 207 |
| PULSE ABNORMAL                             | 10037466 | 207 |
| SKIN LACERATION                            | 10058818 | 207 |
| FREQUENT BOWEL MOVEMENTS                   | 10017367 | 206 |
| GLYCOSYLATED HAEMOGLOBIN INCREASED         | 10018484 | 206 |
| HYPOTONIA                                  | 10021118 | 206 |
| RESPIRATORY ARREST                         | 10038669 | 206 |
| TRISMUS                                    | 10044684 | 206 |
| DERMATITIS ALLERGIC                        | 10012434 | 205 |
| CARDIOVERSION                              | 10007661 | 204 |
| GAZE PALSY                                 | 10056696 | 204 |
| ACOUSTIC STIMULATION TESTS NORMAL          | 10000527 | 203 |
| EYE DISCHARGE                              | 10015915 | 203 |
| SPUTUM DISCOLOURED                         | 10041807 | 203 |
| MEAN PLATELET VOLUME NORMAL                | 10055070 | 203 |
| CEREBRAL INFARCTION                        | 10008118 | 202 |
| IRRITABLE BOWEL SYNDROME                   | 10023003 | 202 |
| NEEDLE ISSUE                               | 10069217 | 202 |
| CARDIAC MONITORING ABNORMAL                | 10053440 | 202 |
| TRYPTASE                                   | 10063240 | 202 |
| HYPOGLYCAEMIA                              | 10020993 | 201 |
| INJECTION SITE OEDEMA                      | 10022085 | 201 |
| MUSCULOSKELETAL DISORDER                   | 10048592 | 200 |
| EUPHORIC MOOD                              | 10015535 | 199 |
| HYPOMENORRHOEA                             | 10021033 | 199 |

|                                        |          |     |
|----------------------------------------|----------|-----|
| THROMBECTOMY                           | 10043530 | 199 |
| TRIGEMINAL NEURALGIA                   | 10044652 | 199 |
| CARDIO-RESPIRATORY ARREST              | 10007617 | 198 |
| COSTOCHONDRITIS                        | 10011219 | 197 |
| CYST                                   | 10011732 | 197 |
| ULTRASOUND ANTENATAL SCREEN ABNORMAL   | 10045400 | 197 |
| EYELID PTOSIS                          | 10015995 | 196 |
| LYMPHOCYTE COUNT DECREASED             | 10025256 | 196 |
| BLOOD POTASSIUM                        | 10005721 | 195 |
| HEMIPLEGIA                             | 10019468 | 195 |
| INCOHERENT                             | 10021630 | 195 |
| VACCINATION SITE LYMPHADENOPATHY       | 10069480 | 195 |
| INJURY                                 | 10022116 | 194 |
| LYMPHOCYTE COUNT                       | 10025251 | 194 |
| LIVER FUNCTION TEST INCREASED          | 10077692 | 194 |
| BODY TEMPERATURE FLUCTUATION           | 10063488 | 193 |
| BORRELIA TEST NEGATIVE                 | 10070280 | 191 |
| INFLAMMATORY MARKER TEST               | 10074736 | 191 |
| LARYNGITIS                             | 10023874 | 189 |
| NERVE COMPRESSION                      | 10029174 | 189 |
| SKIN INDURATION                        | 10051837 | 189 |
| IMMUNOLOGY TEST                        | 10062297 | 189 |
| TONSILLAR HYPERTROPHY                  | 10044003 | 188 |
| BLOOD BILIRUBIN INCREASED              | 10005364 | 187 |
| SPINAL X-RAY                           | 10041604 | 187 |
| BLOOD IRON                             | 10005616 | 186 |
| CAESAREAN SECTION                      | 10006924 | 186 |
| CHAPPED LIPS                           | 10049047 | 186 |
| FACE INJURY                            | 10050392 | 186 |
| CARBON DIOXIDE DECREASED               | 10007223 | 185 |
| FOOD ALLERGY                           | 10016946 | 185 |
| SUPRAVENTRICULAR EXTRASYSTOLES         | 10042602 | 185 |
| ERYTHEMA MULTIFORME                    | 10015218 | 184 |
| MUSCLE RIGIDITY                        | 10028330 | 184 |
| POLYMYALGIA RHEUMATICA                 | 10036099 | 184 |
| INFLUENZA A VIRUS TEST                 | 10070416 | 184 |
| MIDDLE EAR EFFUSION                    | 10062545 | 184 |
| MUSCLE SWELLING                        | 10064470 | 183 |
| CHRONIC KIDNEY DISEASE                 | 10064848 | 183 |
| DERMATITIS CONTACT                     | 10012442 | 182 |
| BED REST                               | 10050118 | 182 |
| FLUID INTAKE REDUCED                   | 10056291 | 182 |
| BLOOD CREATINE PHOSPHOKINASE INCREASED | 10005470 | 181 |

|                                             |          |     |
|---------------------------------------------|----------|-----|
| MOOD SWINGS                                 | 10027951 | 181 |
| STOOL ANALYSIS                              | 10059536 | 181 |
| CHOKING                                     | 10008589 | 180 |
| CULTURE URINE POSITIVE                      | 10011640 | 180 |
| DEMENTIA                                    | 10012267 | 180 |
| PULSE ABSENT                                | 10037469 | 180 |
| X-RAY LIMB NORMAL                           | 10061587 | 180 |
| SEPTIC SHOCK                                | 10040070 | 179 |
| VISUAL FIELD DEFECT                         | 10047555 | 179 |
| ANGER                                       | 10002368 | 178 |
| ULTRASOUND BREAST                           | 10045409 | 178 |
| TENSION                                     | 10043268 | 177 |
| VITAMIN D DECREASED                         | 10062189 | 177 |
| BLOOD THYROID STIMULATING HORMONE INCREASED | 10005833 | 176 |
| CONCUSSION                                  | 10010254 | 176 |
| PNEUMONITIS                                 | 10035742 | 176 |
| PURPURA                                     | 10037549 | 176 |
| EOSINOPHIL PERCENTAGE                       | 10059464 | 176 |
| MAMMOGRAM NORMAL                            | 10026737 | 175 |
| GASTRIC DISORDER                            | 10056819 | 175 |
| X-RAY LIMB ABNORMAL                         | 10061586 | 175 |
| MIGRAINE WITH AURA                          | 10027607 | 174 |
| POSITRON EMISSION TOMOGRAM                  | 10036220 | 174 |
| EYE INFLAMMATION                            | 10015943 | 173 |
| RAYNAUD'S PHENOMENON                        | 10037912 | 173 |
| PLEURISY                                    | 10035618 | 172 |
| PREMENSTRUAL SYNDROME                       | 10036618 | 172 |
| WHEELCHAIR USER                             | 10047920 | 172 |
| CHEMOTHERAPY                                | 10061758 | 172 |
| AUDIOGRAM                                   | 10003760 | 171 |
| ELECTROCARDIOGRAM AMBULATORY ABNORMAL       | 10014369 | 171 |
| LIP DRY                                     | 10024552 | 171 |
| MUSCLE DISORDER                             | 10028300 | 171 |
| ANGIOGRAM NORMAL                            | 10061638 | 171 |
| POLYURIA                                    | 10036142 | 170 |
| SHOCK                                       | 10040560 | 170 |
| IMMATURE GRANULOCYTE COUNT                  | 10085122 | 170 |
| RED CELL DISTRIBUTION WIDTH INCREASED       | 10053920 | 170 |
| MENTAL DISORDER                             | 10061284 | 170 |
| OVARIAN CYST                                | 10033132 | 169 |
| PHARYNGEAL ERYTHEMA                         | 10057009 | 169 |
| COMPUTERISED TOMOGRAM ABDOMEN NORMAL        | 10057800 | 169 |
| ANAPHYLACTIC SHOCK                          | 10002199 | 168 |

|                                       |          |     |
|---------------------------------------|----------|-----|
| THYROID DISORDER                      | 10043709 | 168 |
| THERAPY NON-RESPONDER                 | 10051082 | 168 |
| THYROXINE FREE                        | 10055157 | 168 |
| PNEUMONIA BACTERIAL                   | 10060946 | 168 |
| COLITIS ULCERATIVE                    | 10009900 | 167 |
| VAGINAL DISCHARGE                     | 10046901 | 167 |
| MOOD ALTERED                          | 10027940 | 166 |
| ROTATOR CUFF SYNDROME                 | 10039227 | 166 |
| DRAINAGE                              | 10084562 | 166 |
| BOWEL MOVEMENT IRREGULARITY           | 10063541 | 166 |
| PLEURITIC PAIN                        | 10035623 | 165 |
| URINARY RETENTION                     | 10046555 | 165 |
| ULTRASOUND PELVIS                     | 10052041 | 165 |
| BASOPHIL PERCENTAGE DECREASED         | 10052219 | 165 |
| ANGIOGRAM CEREBRAL ABNORMAL           | 10052906 | 165 |
| DEAFNESS NEUROSENSORY                 | 10011891 | 164 |
| PSORIATIC ARTHROPATHY                 | 10037162 | 164 |
| SERUM FERRITIN                        | 10040246 | 164 |
| ORAL DISORDER                         | 10067621 | 164 |
| BODY TEMPERATURE ABNORMAL             | 10075265 | 164 |
| LYMPHOCYTE PERCENTAGE                 | 10059905 | 163 |
| LIVEDO RETICULARIS                    | 10024648 | 162 |
| RESPIRATORY RATE                      | 10038709 | 162 |
| VASCULITIS                            | 10047115 | 162 |
| BLOOD ELECTROLYTES NORMAL             | 10061015 | 162 |
| LYMPHOCYTE COUNT NORMAL               | 10025260 | 161 |
| MENOPAUSE                             | 10027308 | 161 |
| PROTHROMBIN TIME NORMAL               | 10037062 | 161 |
| BREATH SOUNDS ABNORMAL                | 10064780 | 161 |
| MONOCYTE COUNT                        | 10027876 | 160 |
| MOTION SICKNESS                       | 10027990 | 160 |
| ORAL MUCOSAL ERUPTION                 | 10030997 | 160 |
| TONGUE DISCOLOURATION                 | 10043949 | 160 |
| ULTRASOUND ABDOMEN ABNORMAL           | 10052039 | 160 |
| ALLERGY TEST NEGATIVE                 | 10056362 | 160 |
| ANGIOGRAM ABNORMAL                    | 10060956 | 160 |
| CATHETERISATION CARDIAC ABNORMAL      | 10007816 | 159 |
| LIPASE NORMAL                         | 10024575 | 159 |
| COVID-19 IMMUNISATION                 | 10084457 | 159 |
| BLOOD CALCIUM                         | 10005392 | 158 |
| TROPONIN I NORMAL                     | 10073406 | 158 |
| ANGIOGRAM CEREBRAL NORMAL             | 10052907 | 157 |
| OPHTHALMOLOGICAL EXAMINATION ABNORMAL | 10056836 | 157 |

|                                          |          |     |
|------------------------------------------|----------|-----|
| METABOLIC FUNCTION TEST ABNORMAL         | 10061286 | 157 |
| VACCINATION ERROR                        | 10063972 | 157 |
| HUNGER                                   | 10020466 | 156 |
| COMPUTERISED TOMOGRAM PELVIS             | 10075023 | 156 |
| WOUND                                    | 10052428 | 156 |
| MUSCLE DISCOMFORT                        | 10028299 | 155 |
| MAGNETIC RESONANCE IMAGING SPINAL NORMAL | 10083138 | 155 |
| ADNEXA UTERI PAIN                        | 10058841 | 155 |
| ANGIOGRAM PULMONARY NORMAL               | 10002442 | 154 |
| PANCREATITIS                             | 10033645 | 154 |
| RENAL DISORDER                           | 10038428 | 154 |
| EJECTION FRACTION                        | 10050527 | 154 |
| WEIGHT BEARING DIFFICULTY                | 10066454 | 154 |
| URTICARIA CHRONIC                        | 10052568 | 154 |
| NEUTROPHIL COUNT NORMAL                  | 10029370 | 153 |
| SERUM FERRITIN INCREASED                 | 10040250 | 153 |
| EOSINOPHIL PERCENTAGE DECREASED          | 10052221 | 153 |
| MYELITIS TRANSVERSE                      | 10028527 | 152 |
| BRAIN NATRIURETIC PEPTIDE NORMAL         | 10053409 | 152 |
| RENAL FUNCTION TEST                      | 10061490 | 152 |
| HAEMATEMESIS                             | 10018830 | 151 |
| ENERGY INCREASED                         | 10048779 | 151 |
| ALANINE AMINOTRANSFERASE                 | 10001546 | 150 |
| BLOOD LACTIC ACID INCREASED              | 10005635 | 150 |
| DROOLING                                 | 10013642 | 150 |
| EOSINOPHIL COUNT NORMAL                  | 10014946 | 150 |
| SEASONAL ALLERGY                         | 10048908 | 150 |
| VULVOVAGINAL PAIN                        | 10069055 | 150 |
| FEAR OF INJECTION                        | 10073753 | 150 |
| VIRAL TEST                               | 10062358 | 150 |
| EJECTION FRACTION NORMAL                 | 10064144 | 150 |
| HORMONE LEVEL ABNORMAL                   | 10061210 | 149 |
| BLOOD CHLORIDE INCREASED                 | 10005420 | 148 |
| LUNG CONSOLIDATION                       | 10025080 | 148 |
| ORTHOSTATIC HYPOTENSION                  | 10031127 | 148 |
| GOUT                                     | 10018627 | 147 |
| SUPPRESSED LACTATION                     | 10042576 | 147 |
| BASOPHIL COUNT DECREASED                 | 10004167 | 146 |
| BLOOD GLUCOSE ABNORMAL                   | 10005554 | 146 |
| HORDEOLUM                                | 10020377 | 146 |
| MASTICATION DISORDER                     | 10026882 | 146 |
| VOMITING PROJECTILE                      | 10047708 | 146 |
| COMPUTERISED TOMOGRAM SPINE              | 10081777 | 146 |

|                                       |          |     |
|---------------------------------------|----------|-----|
| ASPARTATE AMINOTRANSFERASE            | 10003476 | 145 |
| GOITRE                                | 10018498 | 145 |
| SITTING DISABILITY                    | 10081807 | 145 |
| ANGIOGRAM CEREBRAL                    | 10052905 | 145 |
| EYELID FUNCTION DISORDER              | 10061145 | 145 |
| BASEDOW'S DISEASE                     | 10004161 | 144 |
| CARPAL TUNNEL SYNDROME                | 10007697 | 144 |
| CHOLELITHIASIS                        | 10008629 | 144 |
| MYOCARDIAL NECROSIS MARKER            | 10075210 | 144 |
| DYSPHEMIA                             | 10054964 | 144 |
| CEREBRAL THROMBOSIS                   | 10008132 | 143 |
| RED BLOOD CELL COUNT                  | 10038150 | 143 |
| HUMAN CHORIONIC GONADOTROPIN NEGATIVE | 10071333 | 143 |
| BACTERIAL INFECTION                   | 10060945 | 143 |
| EAR DISORDER                          | 10014004 | 142 |
| MONOCYTE COUNT INCREASED              | 10027880 | 142 |
| UVEITIS                               | 10046851 | 142 |
| AUTOIMMUNE THYROIDITIS                | 10049046 | 142 |
| NEAR DEATH EXPERIENCE                 | 10068111 | 142 |
| INFUSION                              | 10060345 | 142 |
| SKIN ABRASION                         | 10064990 | 142 |
| BRADYKINESIA                          | 10006100 | 141 |
| BRONCHOSPASM                          | 10006482 | 141 |
| INJECTION SITE HYPERSENSITIVITY       | 10022071 | 141 |
| KIDNEY INFECTION                      | 10023424 | 141 |
| MONOCYTE COUNT NORMAL                 | 10027882 | 141 |
| BLOOD POTASSIUM INCREASED             | 10005725 | 140 |
| MITRAL VALVE INCOMPETENCE             | 10027727 | 140 |
| PUSTULE                               | 10037578 | 140 |
| VENTRICULAR TACHYCARDIA               | 10047302 | 140 |
| FOETAL DEATH                          | 10055690 | 140 |
| ACUTE RESPIRATORY DISTRESS SYNDROME   | 10001052 | 139 |
| LUMBAR PUNCTURE ABNORMAL              | 10025000 | 139 |
| SCREAMING                             | 10039740 | 139 |
| SMEAR CERVIX                          | 10041205 | 139 |
| AUTOPSY                               | 10050117 | 139 |
| BACTERIAL TEST                        | 10068074 | 139 |
| BASOPHIL PERCENTAGE                   | 10059471 | 139 |
| CARDIAC PACEMAKER INSERTION           | 10007598 | 138 |
| NEUTROPHIL COUNT DECREASED            | 10029366 | 138 |
| PAPULE                                | 10033733 | 138 |
| SKIN SENSITISATION                    | 10070835 | 138 |
| CEREBRAL VENOUS SINUS THROMBOSIS      | 10083037 | 138 |



|                                         |          |     |
|-----------------------------------------|----------|-----|
| SARS-COV-2 RNA                          | 10085493 | 138 |
| BLOOD CHLORIDE DECREASED                | 10005419 | 137 |
| HYPERAESTHESIA TEETH                    | 10082426 | 137 |
| BREAST CANCER FEMALE                    | 10057654 | 137 |
| COAGULOPATHY                            | 10009802 | 136 |
| THYROXINE                               | 10043813 | 136 |
| TONGUE BLISTERING                       | 10043942 | 136 |
| EOSINOPHIL COUNT DECREASED              | 10014943 | 135 |
| MYOSITIS                                | 10028653 | 135 |
| VACCINATION SITE NODULE                 | 10069616 | 135 |
| BLOOD IMMUNOGLOBULIN M                  | 10005598 | 134 |
| HAEMATOCRIT                             | 10018837 | 134 |
| MEDICATION ERROR                        | 10027091 | 134 |
| VASODILATATION                          | 10047141 | 134 |
| NUCLEIC ACID TEST                       | 10083356 | 134 |
| DIABETIC KETOACIDOSIS                   | 10012671 | 133 |
| UTERINE SPASM                           | 10046823 | 133 |
| WHITE BLOOD CELLS URINE POSITIVE        | 10047967 | 133 |
| SINUS RHYTHM                            | 10048815 | 133 |
| ATAXIA                                  | 10003591 | 132 |
| AUDIOGRAM ABNORMAL                      | 10003761 | 132 |
| ELECTROMYOGRAM NORMAL                   | 10014432 | 132 |
| HYPOAESTHESIA EYE                       | 10020939 | 132 |
| INTERVERTEBRAL DISC PROTRUSION          | 10050296 | 132 |
| LIP ERYTHEMA                            | 10080124 | 132 |
| THYROXINE FREE NORMAL                   | 10055159 | 132 |
| EAR, NOSE AND THROAT EXAMINATION        | 10056807 | 132 |
| PILOERECTION                            | 10035039 | 131 |
| UTERINE LEIOMYOMA                       | 10046798 | 131 |
| SYSTEMIC INFLAMMATORY RESPONSE SYNDROME | 10051379 | 131 |
| CARDIAC MONITORING NORMAL               | 10053439 | 131 |
| METABOLIC ENCEPHALOPATHY                | 10062190 | 131 |
| STRIDOR                                 | 10042241 | 130 |
| BORRELIA TEST                           | 10070279 | 130 |
| PROTEIN URINE PRESENT                   | 10053123 | 130 |
| NEUTROPHIL PERCENTAGE                   | 10059467 | 130 |
| ABNORMAL SENSATION IN EYE               | 10000173 | 129 |
| GLYCOSYLATED HAEMOGLOBIN NORMAL         | 10018485 | 129 |
| NYSTAGMUS                               | 10029864 | 129 |
| RASH MORBILLIFORM                       | 10037870 | 129 |
| SKIN TEST                               | 10040929 | 129 |
| TEARFULNESS                             | 10043169 | 129 |
| ULTRASOUND ABDOMEN NORMAL               | 10052040 | 129 |

|                                      |          |     |
|--------------------------------------|----------|-----|
| REFUSAL OF TREATMENT BY PATIENT      | 10056407 | 129 |
| NEUROLOGICAL EXAMINATION NORMAL      | 10056831 | 129 |
| RENAL FUNCTION TEST NORMAL           | 10061491 | 129 |
| BLOOD SODIUM                         | 10005799 | 128 |
| BREAST DISCOMFORT                    | 10049872 | 128 |
| AUTONOMIC NERVOUS SYSTEM IMBALANCE   | 10003840 | 127 |
| BLOOD UREA                           | 10005845 | 127 |
| MONOCYTE PERCENTAGE INCREASED        | 10052230 | 127 |
| VIRAL TEST NEGATIVE                  | 10062362 | 127 |
| ATRIAL FLUTTER                       | 10003662 | 126 |
| DECREASED ACTIVITY                   | 10011953 | 126 |
| DIARRHOEA HAEMORRHAGIC               | 10012741 | 126 |
| ROAD TRAFFIC ACCIDENT                | 10039203 | 126 |
| SLOW SPEECH                          | 10071299 | 126 |
| UPPER RESPIRATORY TRACT CONGESTION   | 10052252 | 126 |
| CARDIAC FUNCTION TEST                | 10058470 | 126 |
| BREAST FEEDING                       | 10006247 | 125 |
| GLOSSITIS                            | 10018386 | 125 |
| CATHETERISATION CARDIAC NORMAL       | 10007817 | 124 |
| PNEUMOTHORAX                         | 10035759 | 124 |
| PATHOLOGY TEST                       | 10068056 | 124 |
| RESPIRATORY SYNCYTIAL VIRUS TEST     | 10068562 | 124 |
| CHRONIC SPONTANEOUS URTICARIA        | 10072757 | 124 |
| THYROID MASS                         | 10058900 | 124 |
| BLOOD UREA NITROGEN/CREATININE RATIO | 10059899 | 124 |
| BLOOD BILIRUBIN                      | 10005362 | 123 |
| COLONOSCOPY ABNORMAL                 | 10010008 | 123 |
| ERYTHEMA OF EYELID                   | 10015237 | 123 |
| FACE OEDEMA                          | 10016029 | 123 |
| STARING                              | 10041953 | 123 |
| VENOGRAM                             | 10047208 | 123 |
| DERMATITIS ACNEIFORM                 | 10012432 | 122 |
| FOETAL HEART RATE ABNORMAL           | 10051139 | 122 |
| INTENTIONAL PRODUCT USE ISSUE        | 10076308 | 122 |
| ARTHROPOD BITE                       | 10003399 | 121 |
| ELECTROMYOGRAM ABNORMAL              | 10014431 | 121 |
| LACTIC ACIDOSIS                      | 10023676 | 121 |
| SUNBURN                              | 10042496 | 121 |
| EXPOSURE VIA SKIN CONTACT            | 10071430 | 121 |
| MASTITIS                             | 10026883 | 120 |
| ULTRASOUND FOETAL                    | 10053140 | 120 |
| INJECTION SITE INFECTION             | 10022076 | 119 |
| TONGUE ERYTHEMA                      | 10079075 | 119 |

|                                               |          |     |
|-----------------------------------------------|----------|-----|
| INJECTION SITE INDENTATION                    | 10079277 | 119 |
| LUMBAR PUNCTURE NORMAL                        | 10025002 | 118 |
| TONGUE ULCERATION                             | 10043991 | 118 |
| VEIN DISORDER                                 | 10047184 | 118 |
| MILIARIA                                      | 10027627 | 117 |
| IMPAIRED QUALITY OF LIFE                      | 10076936 | 117 |
| EXPOSURE VIA BREAST MILK                      | 10080751 | 117 |
| STAPHYLOCOCCAL INFECTION                      | 10058080 | 117 |
| TROPONIN I INCREASED                          | 10058268 | 117 |
| NITRITE URINE ABSENT                          | 10060799 | 117 |
| TENDON PAIN                                   | 10066371 | 117 |
| GENITAL HERPES                                | 10018150 | 116 |
| INTERSTITIAL LUNG DISEASE                     | 10022611 | 116 |
| MEAN CELL HAEMOGLOBIN CONCENTRATION DECREASED | 10026991 | 116 |
| RHABDOMYOLYSIS                                | 10039020 | 116 |
| SUBARACHNOID HAEMORRHAGE                      | 10042316 | 116 |
| URINE LEUKOCYTE ESTERASE POSITIVE             | 10050795 | 116 |
| EYELIDS PRURITUS                              | 10051627 | 116 |
| EYELID RASH                                   | 10074620 | 116 |
| COAGULATION TEST                              | 10063556 | 116 |
| ARTERIOGRAM CAROTID NORMAL                    | 10003196 | 115 |
| BLOOD LACTIC ACID NORMAL                      | 10005636 | 115 |
| NEOPLASM MALIGNANT                            | 10028997 | 115 |
| BRAIN OEDEMA                                  | 10048962 | 115 |
| PROCALCITONIN INCREASED                       | 10067081 | 115 |
| ANTINUCLEAR ANTIBODY INCREASED                | 10064726 | 115 |
| CHOLECYSTECTOMY                               | 10008611 | 114 |
| HIV TEST NEGATIVE                             | 10020187 | 114 |
| INITIAL INSOMNIA                              | 10022035 | 114 |
| PROTHROMBIN TIME PROLONGED                    | 10037063 | 114 |
| TRIGGER FINGER                                | 10044654 | 114 |
| MEAN PLATELET VOLUME INCREASED                | 10055052 | 114 |
| ANTI-THYROID ANTIBODY                         | 10060325 | 114 |
| DIALYSIS                                      | 10061105 | 114 |
| ALOPECIA AREATA                               | 10001761 | 113 |
| BLINDNESS TRANSIENT                           | 10005184 | 113 |
| CARDIOMYOPATHY                                | 10007636 | 113 |
| LYME DISEASE                                  | 10025169 | 113 |
| MONONUCLEOSIS HETEROPHILE TEST NEGATIVE       | 10027921 | 113 |
| COMMUNICATION DISORDER                        | 10061046 | 113 |
| EYE INFECTION                                 | 10015929 | 112 |
| HYPERKALAEMIA                                 | 10020646 | 112 |
| MUSCLE ATROPHY                                | 10028289 | 112 |

|                                   |          |     |
|-----------------------------------|----------|-----|
| CANDIDA INFECTION                 | 10074170 | 112 |
| TYPE IV HYPERSENSITIVITY REACTION | 10053613 | 112 |
| SCAN BRAIN                        | 10061500 | 112 |
| ALTERED STATE OF CONSCIOUSNESS    | 10001854 | 111 |
| BLOOD FOLATE                      | 10005524 | 111 |
| HIATUS HERNIA                     | 10020028 | 111 |
| PLATELET TRANSFUSION              | 10035543 | 111 |
| CORONARY ARTERIAL STENT INSERTION | 10052086 | 111 |
| TYPE 2 DIABETES MELLITUS          | 10067585 | 111 |
| FRUSTRATION TOLERANCE DECREASED   | 10077753 | 111 |
| BASOPHIL COUNT NORMAL             | 10004170 | 110 |
| HEPATIC STEATOSIS                 | 10019708 | 110 |
| ROSACEA                           | 10039218 | 110 |
| TEMPOROMANDIBULAR JOINT SYNDROME  | 10043220 | 110 |
| EYE CONTUSION                     | 10073354 | 110 |
| FURUNCLE                          | 10017553 | 109 |
| HALLUCINATION, VISUAL             | 10019075 | 109 |
| OPHTHALMIC MIGRAINE               | 10030867 | 109 |
| PREGNANCY TEST POSITIVE           | 10036575 | 109 |
| RASH PUSTULAR                     | 10037888 | 109 |
| THROMBOPHLEBITIS SUPERFICIAL      | 10043595 | 109 |
| STENT PLACEMENT                   | 10048561 | 109 |
| HERPES SIMPLEX TEST NEGATIVE      | 10077970 | 109 |
| SKIN WEEPING                      | 10080560 | 109 |
| METAMORPHOPSIA                    | 10063341 | 109 |
| HIV TEST                          | 10020185 | 108 |
| VARICOSE VEIN                     | 10046996 | 108 |
| ABNORMAL FAECES                   | 10000133 | 107 |
| AURA                              | 10003791 | 107 |
| BLOOD CULTURE POSITIVE            | 10005488 | 107 |
| CATARACT                          | 10007739 | 107 |
| MYASTHENIA GRAVIS                 | 10028417 | 107 |
| PREMATURE LABOUR                  | 10036600 | 107 |
| PROTEIN TOTAL DECREASED           | 10037014 | 107 |
| URINE LEUKOCYTE ESTERASE          | 10050413 | 107 |
| COMPLEMENT FACTOR C4              | 10050963 | 107 |
| CEREBRAL DISORDER                 | 10054938 | 107 |
| PULSELESS ELECTRICAL ACTIVITY     | 10058151 | 107 |
| EYELID DISORDER                   | 10061130 | 107 |
| BACTERIAL TEST NEGATIVE           | 10065004 | 107 |
| BODY MASS INDEX                   | 10005894 | 106 |
| CARDIAC FAILURE ACUTE             | 10007556 | 106 |
| DELUSION                          | 10012239 | 106 |

|                                       |          |     |
|---------------------------------------|----------|-----|
| DISSOCIATION                          | 10013457 | 106 |
| ELECTROENCEPHALOGRAM ABNORMAL         | 10014408 | 106 |
| NIPPLE PAIN                           | 10029421 | 106 |
| POOR PERIPHERAL CIRCULATION           | 10036155 | 106 |
| PSYCHOMOTOR HYPERACTIVITY             | 10037211 | 106 |
| JOINT NOISE                           | 10074329 | 106 |
| INTERVERTEBRAL DISC DEGENERATION      | 10061246 | 106 |
| ABDOMINAL X-RAY                       | 10061612 | 106 |
| BLOOD ALKALINE PHOSPHATASE            | 10005298 | 105 |
| CORONARY ARTERY DISEASE               | 10011078 | 105 |
| PHARYNGITIS                           | 10034835 | 105 |
| TRICUSPID VALVE INCOMPETENCE          | 10044640 | 105 |
| VIBRATORY SENSE INCREASED             | 10068327 | 105 |
| HYPORESPONSIVE TO STIMULI             | 10071552 | 105 |
| ULTRASOUND FOETAL ABNORMAL            | 10077578 | 105 |
| RED BLOOD CELL NUCLEATED MORPHOLOGY   | 10080979 | 105 |
| EYELID PAIN                           | 10059208 | 105 |
| APPETITE DISORDER                     | 10060961 | 105 |
| AGGRESSION                            | 10001488 | 104 |
| BLADDER CATHETERISATION               | 10005028 | 104 |
| BLOOD LACTATE DEHYDROGENASE INCREASED | 10005630 | 104 |
| MEAN CELL VOLUME INCREASED            | 10027004 | 104 |
| PREMATURE DELIVERY                    | 10036595 | 104 |
| SARS-COV-1 TEST                       | 10084444 | 104 |
| BLOOD PHOSPHORUS                      | 10005717 | 103 |
| LICHEN PLANUS                         | 10024429 | 103 |
| NASAL DRYNESS                         | 10028740 | 103 |
| SJOGREN'S SYNDROME                    | 10040767 | 103 |
| TIC                                   | 10043833 | 103 |
| FINE MOTOR SKILL DYSFUNCTION          | 10076288 | 103 |
| CARDIAC STRESS TEST ABNORMAL          | 10055014 | 103 |
| BACTERIAL TEST POSITIVE               | 10059421 | 103 |
| GENERAL SYMPTOM                       | 10060891 | 103 |
| BLOOD MAGNESIUM DECREASED             | 10005654 | 102 |
| METABOLIC ACIDOSIS                    | 10027417 | 102 |
| MOANING                               | 10027783 | 102 |
| PULMONARY HYPERTENSION                | 10037400 | 102 |
| LIP DISORDER                          | 10048470 | 102 |
| PROTEIN TOTAL                         | 10050537 | 102 |
| MULTIPLE ORGAN DYSFUNCTION SYNDROME   | 10077361 | 102 |
| CARDIAC MURMUR                        | 10007586 | 101 |
| CONJUNCTIVAL HAEMORRHAGE              | 10010719 | 101 |
| ESSENTIAL HYPERTENSION                | 10015488 | 101 |

|                                     |          |     |
|-------------------------------------|----------|-----|
| SEDATION                            | 10039897 | 101 |
| SPECIFIC GRAVITY URINE NORMAL       | 10041440 | 101 |
| PROCALCITONIN NORMAL                | 10077831 | 101 |
| DEAFNESS BILATERAL                  | 10052556 | 101 |
| HOSPITALISATION                     | 10054112 | 101 |
| CLUSTER HEADACHE                    | 10059133 | 101 |
| IMMOBILE                            | 10021417 | 100 |
| SERUM FERRITIN NORMAL               | 10040251 | 100 |
| SPLENOMEGALY                        | 10041660 | 100 |
| VASCULAR PAIN                       | 10047095 | 100 |
| DISCHARGE                           | 10080907 | 100 |
| GENERAL PHYSICAL CONDITION ABNORMAL | 10058911 | 100 |
| BLOOD ELECTROLYTES                  | 10061013 | 100 |
| JAW DISORDER                        | 10061257 | 100 |
| OBSTRUCTIVE AIRWAYS DISORDER        | 10061877 | 100 |
| GLUCOSE TOLERANCE TEST              | 10018432 | 99  |
| OPTIC NEURITIS                      | 10030942 | 99  |
| SKIN ULCER                          | 10040943 | 99  |
| ARTERIOGRAM CAROTID                 | 10003194 | 98  |
| DISABILITY                          | 10013050 | 98  |
| ELECTROLYTE IMBALANCE               | 10014418 | 98  |
| HYPOGEUSIA                          | 10020989 | 98  |
| INJECTION SITE EXTRAVASATION        | 10022062 | 98  |
| ORAL CANDIDIASIS                    | 10030963 | 98  |
| BRADYPHRENIA                        | 10050012 | 98  |
| TREPONEMA TEST NEGATIVE             | 10070403 | 98  |
| PARANASAL SINUS HYPERSECRETION      | 10057392 | 98  |
| MUSCLE CONTRACTURE                  | 10062575 | 98  |
| BLOOD UREA DECREASED                | 10005850 | 97  |
| IMPAIRED HEALING                    | 10021519 | 97  |
| LEUKOPENIA                          | 10024384 | 97  |
| PHARYNGITIS STREPTOCOCCAL           | 10034839 | 97  |
| PULMONARY FIBROSIS                  | 10037383 | 97  |
| COMPLEMENT FACTOR C3                | 10050962 | 97  |
| RHINALGIA                           | 10051496 | 97  |
| CHLAMYDIA TEST NEGATIVE             | 10070273 | 97  |
| SMALL FIBRE NEUROPATHY              | 10073928 | 97  |
| DEFAECATION URGENCY                 | 10012110 | 96  |
| LIPASE INCREASED                    | 10024574 | 96  |
| THYROID FUNCTION TEST ABNORMAL      | 10043730 | 96  |
| URINE ABNORMALITY                   | 10046607 | 96  |
| ULTRASOUND THYROID                  | 10049501 | 96  |
| HEPATIC ENZYME                      | 10060793 | 96  |

|                                              |          |    |
|----------------------------------------------|----------|----|
| BIOPSY BONE MARROW                           | 10004737 | 95 |
| ELECTROCARDIOGRAM AMBULATORY NORMAL          | 10014370 | 95 |
| LOCALISED INFECTION                          | 10024774 | 95 |
| PANCREATITIS ACUTE                           | 10033647 | 95 |
| PARANOIA                                     | 10033864 | 95 |
| WHITE MATTER LESION                          | 10072731 | 95 |
| URINE OUTPUT DECREASED                       | 10059895 | 95 |
| PH URINE NORMAL                              | 10034797 | 94 |
| ADENOVIRUS TEST                              | 10050991 | 94 |
| SYMPTOM RECURRENCE                           | 10080080 | 94 |
| ABDOMINAL TENDERNESS                         | 10000097 | 93 |
| BLOOD BLISTER                                | 10005372 | 93 |
| LIGAMENT SPRAIN                              | 10024453 | 93 |
| LIVER DISORDER                               | 10024670 | 93 |
| LYMPHOCYTE COUNT INCREASED                   | 10025258 | 93 |
| PNEUMONIA VIRAL                              | 10035737 | 93 |
| UTERINE CONTRACTIONS DURING PREGNANCY        | 10049975 | 93 |
| GYNAECOLOGICAL EXAMINATION                   | 10050317 | 93 |
| CENTRAL VENOUS CATHETERISATION               | 10053377 | 93 |
| ANTIBODY TEST NEGATIVE                       | 10061426 | 93 |
| CULTURE NEGATIVE                             | 10061448 | 93 |
| BLOOD BICARBONATE DECREASED                  | 10005359 | 92 |
| CHOKING SENSATION                            | 10008590 | 92 |
| HYPERPYREXIA                                 | 10020741 | 92 |
| MOUTH HAEMORRHAGE                            | 10028024 | 92 |
| VENTILATION/PERFUSION SCAN                   | 10047264 | 92 |
| VESTIBULAR NEURONITIS                        | 10047393 | 92 |
| CENTRAL NERVOUS SYSTEM LESION                | 10051290 | 92 |
| CARDIOVASCULAR EVALUATION                    | 10053046 | 92 |
| CARDIAC ABLATION                             | 10059864 | 92 |
| ACTIVATED PARTIAL THROMBOPLASTIN TIME NORMAL | 10000635 | 91 |
| CULTURE STOOL                                | 10011629 | 91 |
| EOSINOPHIL COUNT INCREASED                   | 10014945 | 91 |
| GLOBULIN                                     | 10018342 | 91 |
| HYPERVOLAEMIA                                | 10020919 | 91 |
| UTERINE HAEMORRHAGE                          | 10046788 | 91 |
| STREPTOCOCCUS TEST POSITIVE                  | 10070055 | 91 |
| BILIRUBIN URINE                              | 10053113 | 91 |
| INJECTION SITE MOVEMENT IMPAIRMENT           | 10056250 | 91 |
| URINE ODOUR ABNORMAL                         | 10057135 | 91 |
| ENLARGED UVULA                               | 10066192 | 91 |
| ALBUMIN GLOBULIN RATIO                       | 10001562 | 90 |
| BLOOD LACTATE DEHYDROGENASE                  | 10005626 | 90 |

|                                              |          |    |
|----------------------------------------------|----------|----|
| GASTROENTERITIS VIRAL                        | 10017918 | 90 |
| SINUS BRADYCARDIA                            | 10040741 | 90 |
| ULTRASOUND ANTENATAL SCREEN                  | 10045399 | 90 |
| INJECTION SITE JOINT PAIN                    | 10049261 | 90 |
| IMAGING PROCEDURE ABNORMAL                   | 10077446 | 90 |
| ACUPUNCTURE                                  | 10000646 | 89 |
| BLADDER PAIN                                 | 10005063 | 89 |
| HIP FRACTURE                                 | 10020100 | 89 |
| LIPIDS NORMAL                                | 10024593 | 89 |
| LOWER RESPIRATORY TRACT INFECTION            | 10024968 | 89 |
| BRAIN INJURY                                 | 10067967 | 89 |
| VACCINATION SITE VESICLES                    | 10069623 | 89 |
| CARDIAC TELEMETRY                            | 10053448 | 89 |
| SUPERFICIAL VEIN THROMBOSIS                  | 10086210 | 89 |
| GLUCOSE URINE ABSENT                         | 10018474 | 88 |
| HYPOTHERMIA                                  | 10021113 | 88 |
| RED BLOOD CELL COUNT INCREASED               | 10038155 | 88 |
| RED BLOOD CELLS URINE POSITIVE               | 10038182 | 88 |
| SLEEP APNOEA SYNDROME                        | 10040979 | 88 |
| ULCER                                        | 10045285 | 88 |
| ULTRASOUND BREAST ABNORMAL                   | 10045410 | 88 |
| INCREASED UPPER AIRWAY SECRETION             | 10062717 | 88 |
| BLOOD ALBUMIN                                | 10005285 | 87 |
| BUNDLE BRANCH BLOCK RIGHT                    | 10006582 | 87 |
| EMPHYSEMA                                    | 10014561 | 87 |
| GALLBLADDER DISORDER                         | 10017626 | 87 |
| HEPATIC PAIN                                 | 10019705 | 87 |
| NONINFECTIVE GINGIVITIS                      | 10074863 | 87 |
| JOINT LOCK                                   | 10061258 | 87 |
| ABNORMAL UTERINE BLEEDING                    | 10085424 | 87 |
| BREAST CYST                                  | 10006220 | 86 |
| DIFFERENTIAL WHITE BLOOD CELL COUNT ABNORMAL | 10012785 | 86 |
| INFECTIOUS MONONUCLEOSIS                     | 10021914 | 86 |
| PANCYTOPENIA                                 | 10033661 | 86 |
| X-RAY OF PELVIS AND HIP                      | 10048159 | 86 |
| TYPE 1 DIABETES MELLITUS                     | 10067584 | 86 |
| MYOCARDIAL NECROSIS MARKER NORMAL            | 10075212 | 86 |
| NASAL PRURITUS                               | 10076406 | 86 |
| ECCHYMOSIS                                   | 10014080 | 85 |
| HANGOVER                                     | 10019133 | 85 |
| HYSTERECTOMY                                 | 10021151 | 85 |
| NAIL DISCOLOURATION                          | 10028692 | 85 |
| TREPONEMA TEST                               | 10070401 | 85 |



|                                                 |          |    |
|-------------------------------------------------|----------|----|
| SPECIALIST CONSULTATION                         | 10076498 | 85 |
| MYCOPLASMA TEST NEGATIVE                        | 10078590 | 85 |
| NEUROLOGICAL EXAMINATION ABNORMAL               | 10056832 | 85 |
| PSYCHOTIC DISORDER                              | 10061920 | 85 |
| SKIN HAEMORRHAGE                                | 10064265 | 85 |
| HEPATOMEGALY                                    | 10019842 | 84 |
| LEFT VENTRICULAR FAILURE                        | 10024119 | 84 |
| RALES                                           | 10037833 | 84 |
| SKIN DISCOMFORT                                 | 10040830 | 84 |
| SKIN INFECTION                                  | 10040872 | 84 |
| VESTIBULAR DISORDER                             | 10047386 | 84 |
| ALLERGY TEST POSITIVE                           | 10056352 | 84 |
| URINE KETONE BODY ABSENT                        | 10057596 | 84 |
| STOOL ANALYSIS NORMAL                           | 10059537 | 84 |
| APPENDICITIS PERFORATED                         | 10003012 | 83 |
| BLOOD FOLATE NORMAL                             | 10005529 | 83 |
| BLOOD PRESSURE NORMAL                           | 10005754 | 83 |
| BRUXISM                                         | 10006514 | 83 |
| ERYTHEMA NODOSUM                                | 10015226 | 83 |
| HAEMORRHOIDS                                    | 10019022 | 83 |
| JAUNDICE                                        | 10023126 | 83 |
| MEAN CELL HAEMOGLOBIN INCREASED                 | 10026996 | 83 |
| NEURALGIC AMYOTROPHY                            | 10029229 | 83 |
| PRE-ECLAMPSIA                                   | 10036485 | 83 |
| ACTIVATED PARTIAL THROMBOPLASTIN TIME SHORTENED | 10000637 | 82 |
| BREAST CANCER                                   | 10006187 | 82 |
| GRANULOMA ANNULARE                              | 10018692 | 82 |
| HYPOMAGNESAEMIA                                 | 10021027 | 82 |
| ULTRASOUND PELVIS NORMAL                        | 10052043 | 82 |
| GLASSY EYES                                     | 10072465 | 82 |
| FAECES SOFT                                     | 10074859 | 82 |
| THERMAL BURN                                    | 10053615 | 82 |
| HAEMORRHAGE URINARY TRACT                       | 10055847 | 82 |
| DYSGRAPHIA                                      | 10058319 | 82 |
| BILEVEL POSITIVE AIRWAY PRESSURE                | 10064530 | 82 |
| ABSCCESS                                        | 10000269 | 81 |
| ATRIOVENTRICULAR BLOCK                          | 10003671 | 81 |
| BACK DISORDER                                   | 10003983 | 81 |
| CSF PROTEIN INCREASED                           | 10011575 | 81 |
| INCREASED APPETITE                              | 10021654 | 81 |
| INDUCED LABOUR                                  | 10021718 | 81 |
| VITREOUS DETACHMENT                             | 10047650 | 81 |
| ESCHERICHIA TEST POSITIVE                       | 10070090 | 81 |

|                                    |          |    |
|------------------------------------|----------|----|
| ENTEROVIRUS TEST NEGATIVE          | 10070397 | 81 |
| GASTROINTESTINAL TUBE INSERTION    | 10053050 | 81 |
| TRANSAMINASES INCREASED            | 10054889 | 81 |
| LAPAROSCOPIC SURGERY               | 10058468 | 81 |
| FOOD INTOLERANCE                   | 10061958 | 81 |
| HYPERLIPIDAEMIA                    | 10062060 | 81 |
| ARTERIOSCLEROSIS                   | 10003210 | 80 |
| OBESITY                            | 10029883 | 80 |
| ULTRASOUND KIDNEY                  | 10045421 | 80 |
| MULTIPLE SCLEROSIS RELAPSE         | 10048393 | 80 |
| ANTIPHOSPHOLIPID ANTIBODIES        | 10058341 | 80 |
| BLOOD GASES ABNORMAL               | 10005539 | 79 |
| IRON DEFICIENCY ANAEMIA            | 10022972 | 79 |
| LIP DISCOLOURATION                 | 10024549 | 79 |
| PO2 DECREASED                      | 10035768 | 79 |
| SLOW RESPONSE TO STIMULI           | 10041045 | 79 |
| SPINAL OSTEOARTHRITIS              | 10041591 | 79 |
| SYNOVIAL CYST                      | 10042858 | 79 |
| THYROIDITIS                        | 10043778 | 79 |
| HUMAN METAPNEUMOVIRUS TEST         | 10072858 | 79 |
| HUMAN RHINOVIRUS TEST              | 10075163 | 79 |
| CARDIAC IMAGING PROCEDURE ABNORMAL | 10053453 | 79 |
| ABNORMAL LOSS OF WEIGHT            | 10000159 | 78 |
| ASPIRATION                         | 10003504 | 78 |
| BIOPSY BREAST                      | 10004744 | 78 |
| HALLUCINATION, AUDITORY            | 10019070 | 78 |
| HIDRADENITIS                       | 10020040 | 78 |
| INJECTION SITE HAEMATOMA           | 10022066 | 78 |
| JOINT EFFUSION                     | 10023215 | 78 |
| MEAN CELL HAEMOGLOBIN DECREASED    | 10026995 | 78 |
| MIDDLE INSOMNIA                    | 10027590 | 78 |
| NUCLEATED RED CELLS                | 10029825 | 78 |
| SMALL INTESTINAL OBSTRUCTION       | 10041101 | 78 |
| VITILIGO                           | 10047642 | 78 |
| PRENATAL SCREENING TEST            | 10072060 | 78 |
| INTENTIONAL DOSE OMISSION          | 10079221 | 78 |
| URINE KETONE BODY PRESENT          | 10057597 | 78 |
| ANTIBODY TEST POSITIVE             | 10061427 | 78 |
| FACIAL SPASM                       | 10063006 | 78 |
| ASCITES                            | 10003445 | 77 |
| BLOOD IRON NORMAL                  | 10005621 | 77 |
| BLOOD PH DECREASED                 | 10005706 | 77 |
| BREAST ENLARGEMENT                 | 10006242 | 77 |

|                                                     |          |    |
|-----------------------------------------------------|----------|----|
| HAEMOGLOBIN INCREASED                               | 10018888 | 77 |
| SKIN ODOUR ABNORMAL                                 | 10040904 | 77 |
| TRI-IODOTHYRONINE                                   | 10044591 | 77 |
| VITAMIN B12 DECREASED                               | 10047608 | 77 |
| TONGUE DRY                                          | 10049713 | 77 |
| ANTI-CYCLIC CITRULLINATED PEPTIDE ANTIBODY          | 10068810 | 77 |
| MAST CELL ACTIVATION SYNDROME                       | 10075217 | 77 |
| UROBILINOGEN URINE                                  | 10059506 | 77 |
| BLOOD COUNT                                         | 10064196 | 77 |
| BIOPSY BREAST ABNORMAL                              | 10004745 | 76 |
| BIOPSY LYMPH GLAND                                  | 10004797 | 76 |
| CORONARY ARTERY OCCLUSION                           | 10011086 | 76 |
| ELECTROCARDIOGRAM ST SEGMENT ELEVATION              | 10014392 | 76 |
| INTRACRANIAL ANEURYSM                               | 10022758 | 76 |
| JOINT DISLOCATION                                   | 10023204 | 76 |
| PNEUMONIA ASPIRATION                                | 10035669 | 76 |
| STRESS ECHOCARDIOGRAM                               | 10050241 | 76 |
| DOUBLE STRANDED DNA ANTIBODY                        | 10050418 | 76 |
| QUALITY OF LIFE DECREASED                           | 10067620 | 76 |
| INJURY ASSOCIATED WITH DEVICE                       | 10069803 | 76 |
| CEREBRAL SMALL VESSEL ISCHAEMIC DISEASE             | 10070878 | 76 |
| N-TERMINAL PROHORMONE BRAIN NATRIURETIC PEPTIDE INC | 10071662 | 76 |
| BLADDER DISORDER                                    | 10061011 | 76 |
| BLOOD BICARBONATE NORMAL                            | 10005361 | 75 |
| BUNDLE BRANCH BLOCK LEFT                            | 10006580 | 75 |
| INJECTION SITE ABSCESS                              | 10022044 | 75 |
| RIB FRACTURE                                        | 10039117 | 75 |
| STRESS CARDIOMYOPATHY                               | 10066286 | 75 |
| COLONOSCOPY NORMAL                                  | 10010011 | 74 |
| EOSINOPHIL COUNT                                    | 10014941 | 74 |
| EPSTEIN-BARR VIRUS TEST                             | 10050681 | 74 |
| LIP INJURY                                          | 10055082 | 74 |
| ASPIRATION PLEURAL CAVITY                           | 10003522 | 73 |
| ATYPICAL PNEUMONIA                                  | 10003757 | 73 |
| EPILEPSY                                            | 10015037 | 73 |
| PERONEAL NERVE PALSY                                | 10034701 | 73 |
| PROTEIN URINE                                       | 10037018 | 73 |
| LEFT VENTRICULAR HYPERTROPHY                        | 10049773 | 73 |
| ORAL MUCOSAL ERYTHEMA                               | 10067418 | 73 |
| BREAST DISCHARGE                                    | 10006223 | 72 |
| ELECTROCARDIOGRAM T WAVE INVERSION                  | 10014395 | 72 |
| INCREASED TENDENCY TO BRUISE                        | 10021688 | 72 |
| MYOCLONUS                                           | 10028622 | 72 |

|                                       |          |    |
|---------------------------------------|----------|----|
| NEOPLASM                              | 10028980 | 72 |
| PERIORBITAL OEDEMA                    | 10034545 | 72 |
| READING DISORDER                      | 10037999 | 72 |
| SPINAL X-RAY ABNORMAL                 | 10041605 | 72 |
| SUBDURAL HAEMATOMA                    | 10042361 | 72 |
| VAGINAL ULCERATION                    | 10046943 | 72 |
| BORDETELLA TEST NEGATIVE              | 10070278 | 72 |
| OPHTHALMOLOGICAL EXAMINATION NORMAL   | 10056835 | 72 |
| ENDOSCOPY ABNORMAL                    | 10061838 | 72 |
| GASTROINTESTINAL INFLAMMATION         | 10064147 | 72 |
| CARBON DIOXIDE                        | 10007220 | 71 |
| DEMYELINATION                         | 10012305 | 71 |
| LISTLESS                              | 10024642 | 71 |
| RETINAL VEIN OCCLUSION                | 10038907 | 71 |
| VITAMIN D DEFICIENCY                  | 10047626 | 71 |
| ELECTROCARDIOGRAM T WAVE ABNORMAL     | 10050380 | 71 |
| DRUG SCREEN NEGATIVE                  | 10050895 | 71 |
| VACCINATION SITE CELLULITIS           | 10069559 | 71 |
| AUTOSCOPY                             | 10074080 | 71 |
| LOWER RESPIRATORY TRACT CONGESTION    | 10075565 | 71 |
| DISORGANISED SPEECH                   | 10076227 | 71 |
| BLOOD CHLORIDE                        | 10005416 | 70 |
| CARBON DIOXIDE INCREASED              | 10007225 | 70 |
| MENIERE'S DISEASE                     | 10027183 | 70 |
| PACKED RED BLOOD CELL TRANSFUSION     | 10033359 | 70 |
| THYROIDITIS SUBACUTE                  | 10043784 | 70 |
| TOOTH DISORDER                        | 10044034 | 70 |
| TONGUE ERUPTION                       | 10052002 | 70 |
| VACCINATION SITE PARAESTHESIA         | 10069481 | 70 |
| SEXUALLY TRANSMITTED DISEASE TEST     | 10084201 | 70 |
| OESOPHAGOGASTRODUODENOSCOPY           | 10053057 | 70 |
| INJECTION SITE LYMPHADENOPATHY        | 10057665 | 70 |
| ESCHERICHIA INFECTION                 | 10061126 | 70 |
| TEMPERATURE REGULATION DISORDER       | 10061376 | 70 |
| HEAD TITUBATION                       | 10064950 | 70 |
| BLOOD URIC ACID                       | 10005858 | 69 |
| EPSTEIN-BARR VIRUS INFECTION          | 10015108 | 69 |
| HAEMORRHAGIC STROKE                   | 10019016 | 69 |
| PROTEINURIA                           | 10037032 | 69 |
| SLEEP DEFICIT                         | 10080881 | 69 |
| COMPUTERISED TOMOGRAM PELVIS ABNORMAL | 10081333 | 69 |
| VULVOVAGINAL PRURITUS                 | 10056530 | 69 |
| RHEUMATOID FACTOR INCREASED           | 10057962 | 69 |

|                                     |          |    |
|-------------------------------------|----------|----|
| BLOOD IMMUNOGLOBULIN A              | 10005583 | 68 |
| GENERALISED OEDEMA                  | 10018092 | 68 |
| HAEMODIALYSIS                       | 10018875 | 68 |
| IMPAIRED GASTRIC EMPTYING           | 10021518 | 68 |
| PREGNANCY TEST URINE NEGATIVE       | 10036577 | 68 |
| SUPERINFECTION                      | 10042566 | 68 |
| TRANSIENT GLOBAL AMNESIA            | 10044380 | 68 |
| LEFT VENTRICULAR DYSFUNCTION        | 10049694 | 68 |
| BLOOD GLUCOSE FLUCTUATION           | 10049803 | 68 |
| ANTINEUTROPHIL CYTOPLASMIC ANTIBODY | 10050552 | 68 |
| DRUG SCREEN                         | 10050837 | 68 |
| BLOOD DISORDER                      | 10061590 | 68 |
| EXFOLIATIVE RASH                    | 10064579 | 68 |
| CARDIOGENIC SHOCK                   | 10007625 | 67 |
| HAEMATOCRIT INCREASED               | 10018840 | 67 |
| HYPERTENSIVE CRISIS                 | 10020802 | 67 |
| LIVER FUNCTION TEST ABNORMAL        | 10024690 | 67 |
| THYROXINE NORMAL                    | 10043820 | 67 |
| EYELID MARGIN CRUSTING              | 10052132 | 67 |
| STREPTOCOCCAL INFECTION             | 10061372 | 67 |
| ULTRASOUND BILIARY TRACT            | 10064146 | 67 |
| APATHY                              | 10002942 | 66 |
| DIPLEGIA                            | 10013033 | 66 |
| SKIN EROSION                        | 10040840 | 66 |
| UTERINE PAIN                        | 10046809 | 66 |
| URINARY SEDIMENT PRESENT            | 10049821 | 66 |
| HYPOSMIA                            | 10050515 | 66 |
| NEUTROPHIL PERCENTAGE DECREASED     | 10052223 | 66 |
| SLEEP STUDY                         | 10053319 | 66 |
| TROPONIN T                          | 10058266 | 66 |
| ULTRASOUND THYROID ABNORMAL         | 10060987 | 66 |
| INJECTION SITE SCAB                 | 10066210 | 66 |
| ANGIOGRAM PULMONARY                 | 10002440 | 65 |
| BLOOD URINE                         | 10005863 | 65 |
| STILLBIRTH                          | 10042062 | 65 |
| TOOTH INFECTION                     | 10048762 | 65 |
| VACCINATION SITE IRRITATION         | 10069479 | 65 |
| COLITIS MICROSCOPIC                 | 10056979 | 65 |
| MALNUTRITION                        | 10061273 | 65 |
| ARTERIOSCLEROSIS CORONARY ARTERY    | 10003211 | 64 |
| BLOOD CALCIUM INCREASED             | 10005396 | 64 |
| DYSTONIA                            | 10013983 | 64 |
| ELECTROCARDIOGRAM QT PROLONGED      | 10014387 | 64 |

|                                                 |          |    |
|-------------------------------------------------|----------|----|
| HYPERCAPNIA                                     | 10020591 | 64 |
| OSTEOPOROSIS                                    | 10031282 | 64 |
| PROTEIN TOTAL INCREASED                         | 10037016 | 64 |
| PROTEIN URINE ABSENT                            | 10037033 | 64 |
| RESPIRATORY RATE DECREASED                      | 10038710 | 64 |
| RETINAL ARTERY OCCLUSION                        | 10038827 | 64 |
| TONGUE BITING                                   | 10050467 | 64 |
| GASTROINTESTINAL SOUNDS ABNORMAL                | 10067715 | 64 |
| PALATAL SWELLING                                | 10074403 | 64 |
| TILT TABLE TEST                                 | 10052700 | 64 |
| HYDRONEPHROSIS                                  | 10020524 | 63 |
| NERVE CONDUCTION STUDIES NORMAL                 | 10029176 | 63 |
| NEUTROPENIA                                     | 10029354 | 63 |
| VULVAL ULCERATION                               | 10047768 | 63 |
| CONSCIOUSNESS FLUCTUATING                       | 10050093 | 63 |
| BLOOD LOSS ANAEMIA                              | 10082297 | 63 |
| MAGNETIC RESONANCE IMAGING BRAIN                | 10083128 | 63 |
| FOAMING AT MOUTH                                | 10062654 | 63 |
| BLOOD PH NORMAL                                 | 10005709 | 62 |
| CARDIOLIPIN ANTIBODY                            | 10007628 | 62 |
| CHOLECYSTITIS                                   | 10008612 | 62 |
| FEMUR FRACTURE                                  | 10016454 | 62 |
| RADIOTHERAPY                                    | 10037794 | 62 |
| N-TERMINAL PROHORMONE BRAIN NATRIURETIC PEPTIDE | 10067803 | 62 |
| IMPAIRED SELF-CARE                              | 10052404 | 62 |
| LYMPH NODE PALPABLE                             | 10057470 | 62 |
| HEPATIC ENZYME ABNORMAL                         | 10062685 | 62 |
| AORTIC ARTERIOSCLEROSIS                         | 10065558 | 62 |
| BACTERAEMIA                                     | 10003997 | 61 |
| KNEE ARTHROPLASTY                               | 10023469 | 61 |
| MANIA                                           | 10026749 | 61 |
| MEAN CELL VOLUME DECREASED                      | 10027002 | 61 |
| NORMAL LABOUR                                   | 10029767 | 61 |
| VULVOVAGINAL DISCOMFORT                         | 10047786 | 61 |
| CHEST TUBE INSERTION                            | 10050522 | 61 |
| PROHORMONE BRAIN NATRIURETIC PEPTIDE INCREASED  | 10077781 | 61 |
| BONE SWELLING                                   | 10053631 | 61 |
| CLOSTRIDIUM DIFFICILE INFECTION                 | 10054236 | 61 |
| COAGULATION TEST NORMAL                         | 10063558 | 61 |
| ANION GAP DECREASED                             | 10002526 | 60 |
| ARTERIOGRAM CAROTID ABNORMAL                    | 10003195 | 60 |
| BIOPSY KIDNEY                                   | 10004782 | 60 |
| BLOOD FIBRINOGEN                                | 10005517 | 60 |

|                                     |          |    |
|-------------------------------------|----------|----|
| BLOOD FOLLICLE STIMULATING HORMONE  | 10005531 | 60 |
| BLOOD IMMUNOGLOBULIN E              | 10005588 | 60 |
| CREPITATIONS                        | 10011376 | 60 |
| INTESTINAL OBSTRUCTION              | 10022687 | 60 |
| LIFE SUPPORT                        | 10024447 | 60 |
| LYMPHOMA                            | 10025310 | 60 |
| MEAN CELL HAEMOGLOBIN               | 10026989 | 60 |
| NASAL OEDEMA                        | 10028750 | 60 |
| OESOPHAGITIS                        | 10030216 | 60 |
| OTORRHOEA                           | 10033101 | 60 |
| POSITRON EMISSION TOMOGRAM ABNORMAL | 10036221 | 60 |
| TONSILLITIS                         | 10044008 | 60 |
| INTERNAL HAEMORRHAGE                | 10075192 | 60 |
| EYELID IRRITATION                   | 10057385 | 60 |
| CULTURE POSITIVE                    | 10061449 | 60 |
| SCAN NORMAL                         | 10061505 | 60 |
| PULMONARY FUNCTION TEST NORMAL      | 10061923 | 60 |
| RESPIRATORY TRACT INFECTION         | 10062352 | 60 |
| LIP EXFOLIATION                     | 10064482 | 60 |
| TACHYPHRENIA                        | 10064805 | 60 |
| INJECTION SITE PAPULE               | 10066044 | 60 |
| BLOOD CREATINE                      | 10005461 | 59 |
| BLOOD OSMOLARITY DECREASED          | 10005696 | 59 |
| BLOOD SODIUM INCREASED              | 10005803 | 59 |
| BREAST INFLAMMATION                 | 10006262 | 59 |
| CARDIOVASCULAR DISORDER             | 10007649 | 59 |
| FAILURE TO THRIVE                   | 10016165 | 59 |
| HAEMORRHAGE IN PREGNANCY            | 10018981 | 59 |
| HIP ARTHROPLASTY                    | 10020096 | 59 |
| MUSCLE SPASTICITY                   | 10028335 | 59 |
| ORTHOPNOEA                          | 10031123 | 59 |
| PLANTAR FASCIITIS                   | 10035155 | 59 |
| SERUM FERRITIN DECREASED            | 10040249 | 59 |
| SMEAR CERVIX NORMAL                 | 10041207 | 59 |
| CLOSTRIDIUM TEST                    | 10070270 | 59 |
| LABOUR INDUCTION                    | 10052856 | 59 |
| ABDOMINAL RIGIDITY                  | 10000090 | 58 |
| ANKLE FRACTURE                      | 10002544 | 58 |
| ANKYLOSING SPONDYLITIS              | 10002556 | 58 |
| CLUMSINESS                          | 10009696 | 58 |
| LABYRINTHITIS                       | 10023567 | 58 |
| NERVE CONDUCTION STUDIES ABNORMAL   | 10029175 | 58 |
| OPHTHALMIC HERPES ZOSTER            | 10030865 | 58 |

|                                               |          |    |
|-----------------------------------------------|----------|----|
| PCO2 INCREASED                                | 10034183 | 58 |
| REACTION TO PREVIOUS EXPOSURE TO ANY VACCINE  | 10066904 | 58 |
| ACCIDENTAL EXPOSURE TO PRODUCT                | 10073317 | 58 |
| MYOCARDIAL NECROSIS MARKER INCREASED          | 10075211 | 58 |
| VACCINATION SITE HYPOAESTHESIA                | 10076168 | 58 |
| MULTISYSTEM INFLAMMATORY SYNDROME IN CHILDREN | 10084767 | 58 |
| ULTRASOUND CHEST                              | 10052962 | 58 |
| CARDIAC FUNCTION TEST NORMAL                  | 10058478 | 58 |
| ENDOSCOPY NORMAL                              | 10061840 | 58 |
| HEPATOBIILIARY SCAN                           | 10061946 | 58 |
| RED BLOOD CELL TRANSFUSION                    | 10087283 | 58 |
| ANION GAP NORMAL                              | 10002530 | 57 |
| BACK INJURY                                   | 10003986 | 57 |
| BONE DISORDER                                 | 10005956 | 57 |
| HEART RATE NORMAL                             | 10019306 | 57 |
| HYPOVOLAEMIA                                  | 10021137 | 57 |
| IRITIS                                        | 10022955 | 57 |
| MEAN CELL HAEMOGLOBIN CONCENTRATION           | 10026990 | 57 |
| PHLEBITIS                                     | 10034879 | 57 |
| RENAL CYST                                    | 10038423 | 57 |
| TENDON DISORDER                               | 10043239 | 57 |
| INTRACARDIAC THROMBUS                         | 10048620 | 57 |
| LOCALISED OEDEMA                              | 10048961 | 57 |
| BLOOD BILIRUBIN DECREASED                     | 10049869 | 57 |
| NO REACTION ON PREVIOUS EXPOSURE TO DRUG      | 10052053 | 57 |
| OCCUPATIONAL EXPOSURE TO SARS-COV-2           | 10084394 | 57 |
| PARTIAL SEIZURES                              | 10061334 | 57 |
| CYTOMEGALOVIRUS TEST                          | 10061806 | 57 |
| CARDITIS                                      | 10062746 | 57 |
| BLOOD CORTISOL                                | 10005455 | 56 |
| BLOOD IMMUNOGLOBULIN G NORMAL                 | 10005597 | 56 |
| BLOOD PRESSURE SYSTOLIC INCREASED             | 10005760 | 56 |
| DRUG INTERACTION                              | 10013710 | 56 |
| MONONUCLEOSIS HETEROPHILE TEST                | 10027920 | 56 |
| MUCOUS STOOLS                                 | 10028140 | 56 |
| OXYGEN SATURATION NORMAL                      | 10033322 | 56 |
| VARICELLA                                     | 10046980 | 56 |
| VENOGRAM NORMAL                               | 10047210 | 56 |
| GRANULOCYTE PERCENTAGE                        | 10068913 | 56 |
| FOETAL GROWTH RESTRICTION                     | 10070531 | 56 |
| OESOPHAGOGASTRODUODENOSCOPY ABNORMAL          | 10072163 | 56 |
| HEPATITIS VIRAL TEST NEGATIVE                 | 10072747 | 56 |
| CORONAVIRUS TEST NEGATIVE                     | 10084269 | 56 |



|                                                     |          |    |
|-----------------------------------------------------|----------|----|
| HAEMATOLOGY TEST                                    | 10053076 | 56 |
| SEROLOGY TEST                                       | 10062163 | 56 |
| BLOOD TRIGLYCERIDES INCREASED                       | 10005839 | 55 |
| CHRONIC FATIGUE SYNDROME                            | 10008874 | 55 |
| COLITIS ISCHAEMIC                                   | 10009895 | 55 |
| COMA                                                | 10010071 | 55 |
| CONTRACEPTION                                       | 10010808 | 55 |
| ELECTROCARDIOGRAM ST SEGMENT DEPRESSION             | 10014391 | 55 |
| ELECTROPHORESIS PROTEIN                             | 10014467 | 55 |
| GENITAL ULCERATION                                  | 10018180 | 55 |
| LOW DENSITY LIPOPROTEIN INCREASED                   | 10024910 | 55 |
| OTITIS MEDIA                                        | 10033078 | 55 |
| PAPILLOEDEMA                                        | 10033712 | 55 |
| PERICARDIAL DRAINAGE                                | 10034471 | 55 |
| PLASMAPHERESIS                                      | 10035486 | 55 |
| RHINITIS                                            | 10039083 | 55 |
| SUDDEN DEATH                                        | 10042434 | 55 |
| NEW DAILY PERSISTENT HEADACHE                       | 10076678 | 55 |
| SPINAL STENOSIS                                     | 10082214 | 55 |
| DENTAL DISCOMFORT                                   | 10054217 | 55 |
| ANGIOPATHY                                          | 10059245 | 55 |
| SPONDYLITIS                                         | 10061371 | 55 |
| NASAL DISORDER                                      | 10062209 | 55 |
| DARK CIRCLES UNDER EYES                             | 10064729 | 55 |
| BLOOD MAGNESIUM INCREASED                           | 10005655 | 54 |
| GIANT CELL ARTERITIS                                | 10018250 | 54 |
| HEPATITIS                                           | 10019717 | 54 |
| MELAENA                                             | 10027141 | 54 |
| PULMONARY INFARCTION                                | 10037410 | 54 |
| RESPIRATORY TRACT IRRITATION                        | 10038731 | 54 |
| SINUS ARRHYTHMIA                                    | 10040739 | 54 |
| SKIN FISSURES                                       | 10040849 | 54 |
| SPINAL X-RAY NORMAL                                 | 10041606 | 54 |
| VENOGRAM ABNORMAL                                   | 10047209 | 54 |
| YAWNING                                             | 10048232 | 54 |
| POSTICTAL STATE                                     | 10048727 | 54 |
| BONE DENSITOMETRY                                   | 10050973 | 54 |
| ULTRASOUND PELVIS ABNORMAL                          | 10052042 | 54 |
| FACIAL ASYMMETRY                                    | 10068737 | 54 |
| ANTI-CYCLIC CITRULLINATED PEPTIDE ANTIBODY NEGATIVE | 10068799 | 54 |
| HERPES VIRUS TEST                                   | 10077971 | 54 |
| INJECTION SITE MUSCLE WEAKNESS                      | 10084588 | 54 |
| DIASTOLIC DYSFUNCTION                               | 10052337 | 54 |

|                                      |          |    |
|--------------------------------------|----------|----|
| INTRAOCULAR PRESSURE TEST            | 10060950 | 54 |
| TOOTH FRACTURE                       | 10062544 | 54 |
| AMYLASE                              | 10002013 | 53 |
| DERMATITIS ATOPIC                    | 10012438 | 53 |
| EXOPHTHALMOS                         | 10015683 | 53 |
| HYPERNATRAEMIA                       | 10020679 | 53 |
| LOW DENSITY LIPOPROTEIN NORMAL       | 10024911 | 53 |
| MEAN CELL VOLUME                     | 10026999 | 53 |
| OXYGEN SATURATION ABNORMAL           | 10033317 | 53 |
| POLYARTHRITIS                        | 10036030 | 53 |
| PREMATURE RUPTURE OF MEMBRANES       | 10036603 | 53 |
| SKIN HYPERPIGMENTATION               | 10040865 | 53 |
| SPINAL COMPRESSION FRACTURE          | 10041541 | 53 |
| BASOPHIL COUNT                       | 10049695 | 53 |
| STAPHYLOCOCCUS TEST POSITIVE         | 10070052 | 53 |
| THERAPEUTIC PRODUCT EFFECT DECREASED | 10082201 | 53 |
| JOINT WARMTH                         | 10054106 | 53 |
| ANTI-THYROID ANTIBODY POSITIVE       | 10060310 | 53 |
| PIGMENTATION DISORDER                | 10062080 | 53 |
| ALBUMIN GLOBULIN RATIO NORMAL        | 10001569 | 52 |
| ARTHRITIS REACTIVE                   | 10003267 | 52 |
| AUTOIMMUNE HEPATITIS                 | 10003827 | 52 |
| CHILLBLAINS                          | 10008528 | 52 |
| COCCYDYNIA                           | 10009829 | 52 |
| FOOT FRACTURE                        | 10016970 | 52 |
| JOINT CONTRACTURE                    | 10023201 | 52 |
| LYMPHOPENIA                          | 10025327 | 52 |
| OESOPHAGEAL PAIN                     | 10030180 | 52 |
| ULTRASOUND KIDNEY NORMAL             | 10045423 | 52 |
| CYTOMEGALOVIRUS TEST NEGATIVE        | 10051622 | 52 |
| OCCIPITAL NEURALGIA                  | 10068106 | 52 |
| VULVOVAGINAL SWELLING                | 10071211 | 52 |
| SKIN TEXTURE ABNORMAL                | 10075267 | 52 |
| HERPES SIMPLEX TEST                  | 10077968 | 52 |
| PRODUCT ADMINISTRATION INTERRUPTED   | 10081479 | 52 |
| DERMATITIS BULLOUS                   | 10012441 | 51 |
| EYELID OEDEMA                        | 10015993 | 51 |
| GENITAL RASH                         | 10018175 | 51 |
| MYOCARDIAL ISCHAEMIA                 | 10028600 | 51 |
| OESOPHAGEAL SPASM                    | 10030184 | 51 |
| ULTRASOUND SCAN VAGINA ABNORMAL      | 10045439 | 51 |
| YELLOW SKIN                          | 10048245 | 51 |
| GASTROSTOMY                          | 10048978 | 51 |

|                                        |          |    |
|----------------------------------------|----------|----|
| INJECTION SITE STREAKING               | 10066778 | 51 |
| FOETAL HYPOKINESIA                     | 10068461 | 51 |
| FUNCTIONAL GASTROINTESTINAL DISORDER   | 10071275 | 51 |
| HUMAN CHORIONIC GONADOTROPIN DECREASED | 10071331 | 51 |
| MENTAL FATIGUE                         | 10076757 | 51 |
| CORONAVIRUS TEST                       | 10084353 | 51 |
| BLOOD PHOSPHORUS NORMAL                | 10054887 | 51 |
| EPSTEIN-BARR VIRUS TEST POSITIVE       | 10064545 | 51 |
| ACIDOSIS                               | 10000486 | 50 |
| AORTIC VALVE INCOMPETENCE              | 10002915 | 50 |
| APNOEA                                 | 10002974 | 50 |
| BLOOD LACTIC ACID DECREASED            | 10005634 | 50 |
| FACIAL BONES FRACTURE                  | 10016042 | 50 |
| LYMPHADENOPATHY MEDIASTINAL            | 10025205 | 50 |
| PROTHROMBIN LEVEL                      | 10037047 | 50 |
| RED CELL DISTRIBUTION WIDTH            | 10051168 | 50 |
| HEART VALVE INCOMPETENCE               | 10067660 | 50 |
| STAPHYLOCOCCUS TEST NEGATIVE           | 10070413 | 50 |
| GINGIVAL DISCOMFORT                    | 10077854 | 50 |
| OXYGEN THERAPY                         | 10078798 | 50 |
| MAGNETIC RESONANCE IMAGING THORACIC    | 10083142 | 50 |
| HYPERTENSIVE URGENCY                   | 10058181 | 50 |
| BRAIN SCAN NORMAL                      | 10061944 | 50 |
| ULTRASOUND UTERUS ABNORMAL             | 10064876 | 50 |
| ANEURYSM                               | 10002329 | 49 |
| AREFLEXIA                              | 10003084 | 49 |
| BLOOD URIC ACID NORMAL                 | 10005862 | 49 |
| MENOPAUSAL SYMPTOMS                    | 10027304 | 49 |
| NEURITIS                               | 10029240 | 49 |
| POST HERPETIC NEURALGIA                | 10036376 | 49 |
| RETINAL DETACHMENT                     | 10038848 | 49 |
| PERIPHERAL VENOUS DISEASE              | 10075049 | 49 |
| ALLODYNIA                              | 10053552 | 49 |
| LACTATION DISORDER                     | 10061261 | 49 |
| SPINAL DISORDER                        | 10061368 | 49 |
| UPPER LIMB FRACTURE                    | 10061394 | 49 |
| BLOOD CHOLESTEROL NORMAL               | 10005426 | 48 |
| BLOOD PRESSURE SYSTOLIC                | 10005756 | 48 |
| CEREBRAL ATROPHY                       | 10008096 | 48 |
| DIVERTICULUM                           | 10013554 | 48 |
| HICCUPS                                | 10020039 | 48 |
| MONOCYTE COUNT DECREASED               | 10027878 | 48 |
| PEMPHIGOID                             | 10034277 | 48 |

|                                                 |          |    |
|-------------------------------------------------|----------|----|
| TRANSVERSE SINUS THROMBOSIS                     | 10044457 | 48 |
| VAGINAL INFECTION                               | 10046914 | 48 |
| VISUAL ACUITY TESTS                             | 10047533 | 48 |
| X-RAY OF PELVIS AND HIP NORMAL                  | 10048161 | 48 |
| NITRITE URINE PRESENT                           | 10051469 | 48 |
| PHYSICAL DECONDITIONING                         | 10051588 | 48 |
| CHEST SCAN                                      | 10076373 | 48 |
| ANGIOCARDIOGRAM                                 | 10080743 | 48 |
| ACUTE LEFT VENTRICULAR FAILURE                  | 10063081 | 48 |
| ABSCCESS DRAINAGE                               | 10000279 | 47 |
| BLOOD CREATINE PHOSPHOKINASE MB                 | 10005471 | 47 |
| BLOOD CREATININE DECREASED                      | 10005482 | 47 |
| CEREBRAL ARTERY OCCLUSION                       | 10008089 | 47 |
| CYSTITIS INTERSTITIAL                           | 10011796 | 47 |
| DYSPNOEA AT REST                                | 10013969 | 47 |
| ENCEPHALITIS                                    | 10014581 | 47 |
| LIPOMA                                          | 10024612 | 47 |
| MUSCLE INJURY                                   | 10028314 | 47 |
| RHEUMATOID FACTOR POSITIVE                      | 10039080 | 47 |
| RHONCHI                                         | 10039109 | 47 |
| SICK RELATIVE                                   | 10040637 | 47 |
| SKIN WRINKLING                                  | 10040954 | 47 |
| EOSINOPHIL PERCENTAGE INCREASED                 | 10052222 | 47 |
| LYMPHOCYTE PERCENTAGE INCREASED                 | 10052232 | 47 |
| LEGIONELLA TEST                                 | 10070410 | 47 |
| POLYMERASE CHAIN REACTION POSITIVE              | 10075628 | 47 |
| IMMUNE-MEDIATED ADVERSE REACTION                | 10077665 | 47 |
| THERAPEUTIC RESPONSE SHORTENED                  | 10078575 | 47 |
| BALANCE TEST                                    | 10084567 | 47 |
| ULTRASOUND UTERUS                               | 10052601 | 47 |
| BODY HEIGHT DECREASED                           | 10056812 | 47 |
| HERPES ZOSTER OTICUS                            | 10063491 | 47 |
| ACTIVATED PARTIAL THROMBOPLASTIN TIME PROLONGED | 10000636 | 46 |
| BILIARY COLIC                                   | 10004663 | 46 |
| BIOPSY BONE MARROW ABNORMAL                     | 10004738 | 46 |
| BIOPSY ENDOMETRIUM                              | 10004769 | 46 |
| BLOOD BICARBONATE INCREASED                     | 10005360 | 46 |
| CULTURE STOOL NEGATIVE                          | 10011630 | 46 |
| ENDOMETRIOSIS                                   | 10014778 | 46 |
| LIP OEDEMA                                      | 10024558 | 46 |
| PREGNANCY TEST URINE                            | 10036576 | 46 |
| PYELONEPHRITIS                                  | 10037596 | 46 |
| ULTRASOUND LIVER                                | 10045427 | 46 |

|                                        |          |    |
|----------------------------------------|----------|----|
| WHITE BLOOD CELLS URINE NEGATIVE       | 10047965 | 46 |
| LIVER INJURY                           | 10067125 | 46 |
| SOFT TISSUE SWELLING                   | 10076991 | 46 |
| CSF TEST                               | 10059690 | 46 |
| ILL-DEFINED DISORDER                   | 10061520 | 46 |
| ARTERIOGRAM CORONARY ABNORMAL          | 10003201 | 45 |
| ARTERIOGRAM CORONARY NORMAL            | 10003202 | 45 |
| BRONCHOSCOPY                           | 10006479 | 45 |
| CLOSTRIDIUM DIFFICILE COLITIS          | 10009657 | 45 |
| COELIAC DISEASE                        | 10009839 | 45 |
| CUTANEOUS VASCULITIS                   | 10011686 | 45 |
| FEELING OF DESPAIR                     | 10016344 | 45 |
| BLOOD URINE ABSENT                     | 10018868 | 45 |
| IRON BINDING CAPACITY TOTAL            | 10022960 | 45 |
| LOW DENSITY LIPOPROTEIN                | 10024900 | 45 |
| MACULE                                 | 10025421 | 45 |
| MENOMETRORRHAGIA                       | 10027295 | 45 |
| PORTAL VEIN THROMBOSIS                 | 10036206 | 45 |
| TREATMENT NONCOMPLIANCE                | 10049414 | 45 |
| LACUNAR INFARCTION                     | 10051078 | 45 |
| HEPATITIS C VIRUS TEST                 | 10068416 | 45 |
| ANTIPHOSPHOLIPID ANTIBODIES NEGATIVE   | 10058342 | 45 |
| INNER EAR DISORDER                     | 10061524 | 45 |
| RED BLOOD CELL ABNORMALITY             | 10061548 | 45 |
| BLOOD TRIGLYCERIDES                    | 10005836 | 44 |
| BLOOD TRIGLYCERIDES NORMAL             | 10005840 | 44 |
| DIABETES MELLITUS INADEQUATE CONTROL   | 10012607 | 44 |
| DISSEMINATED INTRAVASCULAR COAGULATION | 10013442 | 44 |
| EMBOLIC STROKE                         | 10014498 | 44 |
| GASTROENTERITIS                        | 10017888 | 44 |
| HAEMORRHAGE INTRACRANIAL               | 10018985 | 44 |
| IRON DEFICIENCY                        | 10022970 | 44 |
| MENINGITIS                             | 10027199 | 44 |
| PUPIL FIXED                            | 10037515 | 44 |
| TOOTH ABSCESS                          | 10044016 | 44 |
| CEREBRAL MASS EFFECT                   | 10067086 | 44 |
| SKIN PLAQUE                            | 10067723 | 44 |
| VACCINATION SITE DISCHARGE             | 10069560 | 44 |
| BLISTER RUPTURE                        | 10073385 | 44 |
| IRREGULAR BREATHING                    | 10076213 | 44 |
| CIRCUMORAL SWELLING                    | 10081703 | 44 |
| CATHETER PLACEMENT                     | 10052915 | 44 |
| AFFECT LABILITY                        | 10054196 | 44 |

|                                         |          |    |
|-----------------------------------------|----------|----|
| ENDOMETRIAL THICKENING                  | 10056432 | 44 |
| LUNG NEOPLASM MALIGNANT                 | 10058467 | 44 |
| FOOT DEFORMITY                          | 10061159 | 44 |
| ISCHAEMIA                               | 10061255 | 44 |
| SCAN ABNORMAL                           | 10061499 | 44 |
| HEPATITIS C TEST NEGATIVE               | 10065001 | 44 |
| EXERCISE ELECTROCARDIOGRAM              | 10015644 | 43 |
| FRACTURE                                | 10017076 | 43 |
| INTRACRANIAL PRESSURE INCREASED         | 10022773 | 43 |
| SCOLIOSIS                               | 10039722 | 43 |
| SMEAR TEST                              | 10041210 | 43 |
| THROMBOPHLEBITIS                        | 10043570 | 43 |
| ULTRASOUND BREAST NORMAL                | 10045411 | 43 |
| VENTRICULAR FIBRILLATION                | 10047290 | 43 |
| CORONARY ARTERY DISSECTION              | 10048631 | 43 |
| FOOD AVERSION                           | 10049238 | 43 |
| BLOOD PHOSPHORUS DECREASED              | 10049471 | 43 |
| HEPARIN-INDUCED THROMBOCYTOPENIA TEST   | 10050829 | 43 |
| VULVOVAGINAL BURNING SENSATION          | 10067641 | 43 |
| END STAGE RENAL DISEASE                 | 10077512 | 43 |
| VESTIBULAR MIGRAINE                     | 10077920 | 43 |
| IDIOPATHIC INTRACRANIAL HYPERTENSION    | 10078904 | 43 |
| MAGNETIC RESONANCE IMAGING BRAIN NORMAL | 10083129 | 43 |
| SUTURE INSERTION                        | 10052665 | 43 |
| BLOOD KETONE BODY                       | 10057593 | 43 |
| GENITAL PAIN                            | 10061979 | 43 |
| IMMUNOSUPPRESSION                       | 10062016 | 43 |
| PREMENSTRUAL PAIN                       | 10065347 | 43 |
| ARTHROPOD STING                         | 10003402 | 42 |
| BONE SCAN                               | 10006009 | 42 |
| CAPILLARY FRAGILITY                     | 10007191 | 42 |
| CULTURE THROAT                          | 10011632 | 42 |
| GLUCOSE TOLERANCE IMPAIRED              | 10018429 | 42 |
| PHARYNGEAL OEDEMA                       | 10034829 | 42 |
| PROCTALGIA                              | 10036772 | 42 |
| SKIN PAPILLOMA                          | 10040907 | 42 |
| ULTRASOUND SCAN VAGINA NORMAL           | 10045440 | 42 |
| VEIN DISCOLOURATION                     | 10047183 | 42 |
| ANGIOTENSIN CONVERTING ENZYME           | 10050289 | 42 |
| SPUTUM CULTURE                          | 10050419 | 42 |
| RED BLOOD CELLS URINE                   | 10050676 | 42 |
| CORONAVIRUS TEST POSITIVE               | 10070255 | 42 |
| MAGNETIC RESONANCE IMAGING ABDOMINAL    | 10083126 | 42 |

|                                                    |          |    |
|----------------------------------------------------|----------|----|
| MAGNETIC RESONANCE IMAGING JOINT                   | 10083134 | 42 |
| EPIGASTRIC DISCOMFORT                              | 10053155 | 42 |
| MAJOR DEPRESSION                                   | 10057840 | 42 |
| PULMONARY FUNCTION TEST ABNORMAL                   | 10061602 | 42 |
| VULVOVAGINAL MYCOTIC INFECTION                     | 10064899 | 42 |
| ANION GAP INCREASED                                | 10002528 | 41 |
| BLEPHARITIS                                        | 10005148 | 41 |
| BLOOD BICARBONATE                                  | 10005357 | 41 |
| CORNEAL REFLEX DECREASED                           | 10011042 | 41 |
| DRUG ERUPTION                                      | 10013687 | 41 |
| EUSTACHIAN TUBE DYSFUNCTION                        | 10015543 | 41 |
| EXOSTOSIS                                          | 10015688 | 41 |
| NORMOCYTIC ANAEMIA                                 | 10029784 | 41 |
| PCO2 DECREASED                                     | 10034181 | 41 |
| THROMBOTIC THROMBOCYTOPENIC PURPURA                | 10043648 | 41 |
| FOREIGN BODY SENSATION IN EYES                     | 10051116 | 41 |
| EPSTEIN-BARR VIRUS TEST NEGATIVE                   | 10067926 | 41 |
| INFLUENZA VIRUS TEST POSITIVE                      | 10070717 | 41 |
| GASTROINTESTINAL WALL THICKENING                   | 10075724 | 41 |
| INCREASED VISCOSITY OF UPPER RESPIRATORY SECRETION | 10076745 | 41 |
| WRONG TECHNIQUE IN DEVICE USAGE PROCESS            | 10077040 | 41 |
| SKIN INDENTATION                                   | 10079274 | 41 |
| MAGNETIC RESONANCE IMAGING BRAIN ABNORMAL          | 10083130 | 41 |
| INJECTION SITE SCAR                                | 10059009 | 41 |
| SIMILAR REACTION ON PREVIOUS EXPOSURE TO DRUG      | 10063672 | 41 |
| MYOSCLEROSIS                                       | 10064584 | 41 |
| BLOOD CREATINE INCREASED                           | 10005464 | 40 |
| DEMENTIA ALZHEIMER'S TYPE                          | 10012271 | 40 |
| DERMATOMYOSITIS                                    | 10012503 | 40 |
| EPISCLERITIS                                       | 10015084 | 40 |
| FOLLICULITIS                                       | 10016936 | 40 |
| HEPATIC CIRRHOSIS                                  | 10019641 | 40 |
| JUGULAR VEIN THROMBOSIS                            | 10023237 | 40 |
| MIOSIS                                             | 10027646 | 40 |
| PANIC DISORDER                                     | 10033666 | 40 |
| PREMATURE SEPARATION OF PLACENTA                   | 10036608 | 40 |
| LYMPHADENECTOMY                                    | 10048956 | 40 |
| LIP HAEMORRHAGE                                    | 10049297 | 40 |
| LEFT ATRIAL ENLARGEMENT                            | 10051860 | 40 |
| TROPONIN T NORMAL                                  | 10073407 | 40 |
| EPSTEIN-BARR VIRUS ANTIBODY POSITIVE               | 10052324 | 40 |
| RIGHT VENTRICULAR DYSFUNCTION                      | 10058597 | 40 |
| LOWER LIMB FRACTURE                                | 10061599 | 40 |

|                                          |          |    |
|------------------------------------------|----------|----|
| TOOTH EXTRACTION                         | 10062132 | 40 |
| NON-CARDIAC CHEST PAIN                   | 10062501 | 40 |
| LIMB IMMOBILISATION                      | 10062615 | 40 |
| CHRONIC LEFT VENTRICULAR FAILURE         | 10063083 | 40 |
| BIOPSY LIVER                             | 10004791 | 39 |
| BIOPSY LIVER ABNORMAL                    | 10004792 | 39 |
| BLOOD LACTATE DEHYDROGENASE NORMAL       | 10005631 | 39 |
| CYSTOSCOPY                               | 10011814 | 39 |
| ELECTROCARDIOGRAM ST SEGMENT ABNORMAL    | 10014390 | 39 |
| GESTATIONAL DIABETES                     | 10018209 | 39 |
| GLOBULINS INCREASED                      | 10018350 | 39 |
| GRAM STAIN POSITIVE                      | 10018656 | 39 |
| HENOCH-SCHONLEIN PURPURA                 | 10019617 | 39 |
| INAPPROPRIATE AFFECT                     | 10021588 | 39 |
| NASAL INFLAMMATION                       | 10028741 | 39 |
| STRABISMUS                               | 10042159 | 39 |
| SUFFOCATION FEELING                      | 10042444 | 39 |
| TOXIC ENCEPHALOPATHY                     | 10044221 | 39 |
| TRACHEOSTOMY                             | 10044320 | 39 |
| VISUAL FIELD TESTS                       | 10047566 | 39 |
| GINGIVAL BLISTER                         | 10049304 | 39 |
| VENTRICULAR HYPOKINESIA                  | 10050510 | 39 |
| GINGIVAL ERYTHEMA                        | 10067419 | 39 |
| OROPHARYNGEAL BLISTERING                 | 10067950 | 39 |
| PERIPHERAL ARTERY THROMBOSIS             | 10072564 | 39 |
| DEPERSONALISATION/DEREALISATION DISORDER | 10077805 | 39 |
| DISCOLOURED VOMIT                        | 10079120 | 39 |
| ATTENTION DEFICIT HYPERACTIVITY DISORDER | 10083622 | 39 |
| X-RAY DENTAL                             | 10052955 | 39 |
| INJECTION                                | 10052995 | 39 |
| DERMATOLOGIC EXAMINATION                 | 10058379 | 39 |
| ANTIBODY TEST ABNORMAL                   | 10061425 | 39 |
| RESPIRATORY SYNCYTIAL VIRUS INFECTION    | 10061603 | 39 |
| OCCULT BLOOD POSITIVE                    | 10061880 | 39 |
| HEPATITIS VIRAL TEST                     | 10061999 | 39 |
| COMPLEX REGIONAL PAIN SYNDROME           | 10064332 | 39 |
| FEAR OF DEATH                            | 10066392 | 39 |
| AFFECTIVE DISORDER                       | 10001443 | 38 |
| AORTIC STENOSIS                          | 10002906 | 38 |
| ATRIAL SEPTAL DEFECT                     | 10003664 | 38 |
| DYSCHROMATOPSIA                          | 10013892 | 38 |
| EAR HAEMORRHAGE                          | 10014009 | 38 |
| EXTUBATION                               | 10015894 | 38 |



|                                              |          |    |
|----------------------------------------------|----------|----|
| IRON BINDING CAPACITY TOTAL NORMAL           | 10022967 | 38 |
| PERSONALITY CHANGE                           | 10034719 | 38 |
| POLYDIPSIA                                   | 10036067 | 38 |
| PRE-EXISTING CONDITION IMPROVED              | 10036495 | 38 |
| RESPIRATORY DEPRESSION                       | 10038678 | 38 |
| HYSTEROSCOPY                                 | 10050125 | 38 |
| SPUTUM CULTURE POSITIVE                      | 10051612 | 38 |
| VACCINATION SITE INFECTION                   | 10068877 | 38 |
| HELICOBACTER TEST NEGATIVE                   | 10070409 | 38 |
| PRODUCT RECONSTITUTION QUALITY ISSUE         | 10079007 | 38 |
| RETINAL MIGRAINE                             | 10052784 | 38 |
| URINE PROTEIN/CREATININE RATIO               | 10053537 | 38 |
| INTERVERTEBRAL DISC DISORDER                 | 10061521 | 38 |
| GENE MUTATION IDENTIFICATION TEST            | 10063477 | 38 |
| NASOPHARYNGEAL SWAB                          | 10085633 | 38 |
| CAROTID ARTERY STENOSIS                      | 10007687 | 37 |
| CSF GLUCOSE NORMAL                           | 10011538 | 37 |
| HEPATIC FAILURE                              | 10019663 | 37 |
| INTRAOCULAR PRESSURE INCREASED               | 10022806 | 37 |
| LOSS OF CONTROL OF LEGS                      | 10024860 | 37 |
| OSTEOMYELITIS                                | 10031252 | 37 |
| PERIPHERAL VASCULAR DISORDER                 | 10034636 | 37 |
| SLEEP TERROR                                 | 10041010 | 37 |
| TONGUE MOVEMENT DISTURBANCE                  | 10043963 | 37 |
| VISUAL ACUITY REDUCED                        | 10047531 | 37 |
| WHITE BLOOD CELL COUNT ABNORMAL              | 10047940 | 37 |
| C-REACTIVE PROTEIN DECREASED                 | 10049220 | 37 |
| EXTREMITY CONTRACTURE                        | 10050732 | 37 |
| DYSCHEZIA                                    | 10051244 | 37 |
| INFLUENZA A VIRUS TEST POSITIVE              | 10070215 | 37 |
| MYCOBACTERIUM TUBERCULOSIS COMPLEX TEST      | 10070472 | 37 |
| HUMAN CHORIONIC GONADOTROPIN POSITIVE        | 10071335 | 37 |
| AUTOIMMUNE HAEMOLYTIC ANAEMIA                | 10073785 | 37 |
| COOLING THERAPY                              | 10079482 | 37 |
| LUNG HYPERINFLATION                          | 10059487 | 37 |
| ANTINEUTROPHIL CYTOPLASMIC ANTIBODY NEGATIVE | 10060137 | 37 |
| RENAL FUNCTION TEST ABNORMAL                 | 10061480 | 37 |
| ALLERGY TO CHEMICALS                         | 10061626 | 37 |
| BLADDER DISCOMFORT                           | 10005034 | 36 |
| BLOOD FIBRINOGEN INCREASED                   | 10005521 | 36 |
| CRANIOTOMY                                   | 10011322 | 36 |
| DYSAESTHESIA                                 | 10013886 | 36 |
| FOOD POISONING                               | 10016952 | 36 |

|                                          |          |    |
|------------------------------------------|----------|----|
| HAIR TEXTURE ABNORMAL                    | 10019049 | 36 |
| LICHEN SCLEROSUS                         | 10024434 | 36 |
| NEPHROTIC SYNDROME                       | 10029164 | 36 |
| RETINAL HAEMORRHAGE                      | 10038867 | 36 |
| SKIN TEST POSITIVE                       | 10040934 | 36 |
| TONGUE COATED                            | 10043945 | 36 |
| OSTEOPENIA                               | 10049088 | 36 |
| PROTEIN C                                | 10050416 | 36 |
| TONIC CLONIC MOVEMENTS                   | 10051171 | 36 |
| EYE OEDEMA                               | 10052139 | 36 |
| BUTTERFLY RASH                           | 10067982 | 36 |
| BURNING MOUTH SYNDROME                   | 10068065 | 36 |
| MICROSCOPY                               | 10069374 | 36 |
| CLOSTRIDIUM TEST POSITIVE                | 10070027 | 36 |
| GESTATIONAL HYPERTENSION                 | 10070538 | 36 |
| BREAST CONSERVING SURGERY                | 10076783 | 36 |
| CEREBELLAR STROKE                        | 10079062 | 36 |
| ALTERED VISUAL DEPTH PERCEPTION          | 10053549 | 36 |
| EYE INJURY                               | 10061128 | 36 |
| FACIAL NERVE DISORDER                    | 10061457 | 36 |
| PARKINSON'S DISEASE                      | 10061536 | 36 |
| ATRIAL TACHYCARDIA                       | 10003668 | 35 |
| AUDIOGRAM NORMAL                         | 10003762 | 35 |
| BIOPSY ENDOMETRIUM NORMAL                | 10004771 | 35 |
| CHIROPRACTIC                             | 10008534 | 35 |
| CONVERSION DISORDER                      | 10010893 | 35 |
| DECUBITUS ULCER                          | 10011985 | 35 |
| FEELING OF RELAXATION                    | 10016352 | 35 |
| HEMIPLEGIC MIGRAINE                      | 10019476 | 35 |
| INTERNATIONAL NORMALISED RATIO DECREASED | 10022594 | 35 |
| MENINGITIS ASEPTIC                       | 10027201 | 35 |
| PERIORBITAL PAIN                         | 10034546 | 35 |
| PETIT MAL EPILEPSY                       | 10034759 | 35 |
| ULTRASOUND ANTENATAL SCREEN NORMAL       | 10045401 | 35 |
| VIRAL RASH                               | 10047476 | 35 |
| VITAMIN B12 DEFICIENCY                   | 10047609 | 35 |
| VITH NERVE PARALYSIS                     | 10047641 | 35 |
| VENA CAVA FILTER INSERTION               | 10048932 | 35 |
| VACCINATION SITE OEDEMA                  | 10069617 | 35 |
| MENISCUS INJURY                          | 10072970 | 35 |
| WRONG PATIENT                            | 10084399 | 35 |
| QUARANTINE                               | 10084468 | 35 |
| PROGESTERONE                             | 10063291 | 35 |

|                                             |          |    |
|---------------------------------------------|----------|----|
| PROCEDURAL PAIN                             | 10064882 | 35 |
| EXCESSIVE EYE BLINKING                      | 10065166 | 35 |
| INJECTION SITE DISCHARGE                    | 10065600 | 35 |
| EXTERNAL EAR PAIN                           | 10065785 | 35 |
| ANAPHYLACTOID REACTION                      | 10002216 | 34 |
| CEREBRAL ISCHAEMIA                          | 10008120 | 34 |
| CEREBRAL VENOUS THROMBOSIS                  | 10008138 | 34 |
| EPICONDYLITIS                               | 10014971 | 34 |
| IRIDOCYCLITIS                               | 10022941 | 34 |
| MULTIPLE ALLERGIES                          | 10028164 | 34 |
| NERVE BLOCK                                 | 10029173 | 34 |
| ORAL LICHEN PLANUS                          | 10030983 | 34 |
| OVARIAN CYST RUPTURED                       | 10033136 | 34 |
| SALIVARY GLAND ENLARGEMENT                  | 10039408 | 34 |
| SENSATION OF BLOOD FLOW                     | 10039996 | 34 |
| TOOTH INJURY                                | 10044043 | 34 |
| IMPLANTABLE DEFIBRILLATOR INSERTION         | 10049442 | 34 |
| ABSCCESS LIMB                               | 10050473 | 34 |
| MEAN PLATELET VOLUME                        | 10050539 | 34 |
| HEARING AID USER                            | 10050852 | 34 |
| BRONCHIAL SECRETION RETENTION               | 10066820 | 34 |
| HEPATITIS B VIRUS TEST                      | 10068415 | 34 |
| HELICOBACTER TEST                           | 10070400 | 34 |
| DRAIN PLACEMENT                             | 10072795 | 34 |
| DIAGNOSTIC ASPIRATION                       | 10072924 | 34 |
| IMPLANTABLE CARDIAC MONITOR INSERTION       | 10074731 | 34 |
| CARDIOVASCULAR EXAMINATION                  | 10074890 | 34 |
| SWALLOW STUDY                               | 10076217 | 34 |
| TOTAL COMPLEMENT ACTIVITY TEST              | 10077882 | 34 |
| CARDIAC DYSFUNCTION                         | 10079751 | 34 |
| INJECTION SITE PUSTULE                      | 10054994 | 34 |
| MEAN PLATELET VOLUME DECREASED              | 10055053 | 34 |
| BLOOD 25-HYDROXYCHOLECALCIFEROL             | 10059936 | 34 |
| CONNECTIVE TISSUE DISORDER                  | 10061087 | 34 |
| COMPLICATION OF PREGNANCY                   | 10061452 | 34 |
| ARTERIAL OCCLUSIVE DISEASE                  | 10062599 | 34 |
| FLOW CYTOMETRY                              | 10065440 | 34 |
| MAGNETIC RESONANCE CHOLANGIOPANCREATOGRAPHY | 10066085 | 34 |
| BACTERIAL VAGINOSIS                         | 10004055 | 33 |
| BLOOD PH INCREASED                          | 10005708 | 33 |
| CARDIAC TAMPONADE                           | 10007610 | 33 |
| DIET REFUSAL                                | 10012775 | 33 |
| ELECTROCARDIOGRAM QT INTERVAL               | 10014385 | 33 |

|                                                   |          |    |
|---------------------------------------------------|----------|----|
| ENURESIS                                          | 10014928 | 33 |
| GINGIVITIS                                        | 10018292 | 33 |
| GLAUCOMA                                          | 10018304 | 33 |
| HIGH DENSITY LIPOPROTEIN DECREASED                | 10020060 | 33 |
| OESTRADIOL                                        | 10030227 | 33 |
| PROTHROMBIN LEVEL NORMAL                          | 10037052 | 33 |
| SARCOIDOSIS                                       | 10039486 | 33 |
| TENDON RUPTURE                                    | 10043248 | 33 |
| TONGUE OEDEMA                                     | 10043967 | 33 |
| TOTAL LUNG CAPACITY DECREASED                     | 10044100 | 33 |
| ULTRASOUND KIDNEY ABNORMAL                        | 10045422 | 33 |
| X-RAY OF PELVIS AND HIP ABNORMAL                  | 10048160 | 33 |
| LAZINESS                                          | 10051602 | 33 |
| MYOCARDIAL STRAIN                                 | 10066954 | 33 |
| MATERNAL EXPOSURE TIMING UNSPECIFIED              | 10071415 | 33 |
| MAGNETIC RESONANCE IMAGING ABDOMINAL ABNORMAL     | 10083132 | 33 |
| SCAN MYOCARDIAL PERFUSION                         | 10054082 | 33 |
| MENSTRUAL DISCOMFORT                              | 10056344 | 33 |
| CHRONIC INFLAMMATORY DEMYELINATING POLYRADICULONE | 10057645 | 33 |
| BIOPSY UTERUS NORMAL                              | 10058404 | 33 |
| CSF TEST ABNORMAL                                 | 10059703 | 33 |
| FREEZING PHENOMENON                               | 10060904 | 33 |
| CRANIAL NERVE DISORDER                            | 10061093 | 33 |
| ESOPHAGEAL DISORDER                               | 10061318 | 33 |
| OPTIC NERVE DISORDER                              | 10061322 | 33 |
| CARDIAC VALVE DISEASE                             | 10061406 | 33 |
| POLYP                                             | 10061529 | 33 |
| DIAGNOSTIC PROCEDURE                              | 10061816 | 33 |
| ORTHOSIS USER                                     | 10066194 | 33 |
| AORTIC ANEURYSM                                   | 10002882 | 32 |
| ATRIOVENTRICULAR BLOCK COMPLETE                   | 10003673 | 32 |
| ATRIOVENTRICULAR BLOCK FIRST DEGREE               | 10003674 | 32 |
| BIOPSY KIDNEY ABNORMAL                            | 10004783 | 32 |
| BRONCHIECTASIS                                    | 10006445 | 32 |
| CSF CULTURE NEGATIVE                              | 10011528 | 32 |
| GASTRIC EMPTYING STUDY                            | 10017782 | 32 |
| HEPATIC CYST                                      | 10019646 | 32 |
| HEPATIC FUNCTION ABNORMAL                         | 10019670 | 32 |
| HEPATITIS C ANTIBODY                              | 10019745 | 32 |
| HILAR LYMPHADENOPATHY                             | 10020094 | 32 |
| RADICULOPATHY                                     | 10037779 | 32 |
| SKIN HYPERTROPHY                                  | 10040867 | 32 |
| SPLENIC INFARCTION                                | 10041648 | 32 |

|                                                  |          |    |
|--------------------------------------------------|----------|----|
| TRI-IODOTHYRONINE INCREASED                      | 10044596 | 32 |
| TUBERCULIN TEST                                  | 10044726 | 32 |
| UPPER GASTROINTESTINAL HAEMORRHAGE               | 10046274 | 32 |
| LARGE INTESTINE POLYP                            | 10051589 | 32 |
| C-REACTIVE PROTEIN ABNORMAL                      | 10068559 | 32 |
| VACCINATION SITE SCAR                            | 10069619 | 32 |
| VARICELLA VIRUS TEST NEGATIVE                    | 10070445 | 32 |
| MYCOBACTERIUM TUBERCULOSIS COMPLEX TEST NEGATIVE | 10070471 | 32 |
| CRANIOCEREBRAL INJURY                            | 10070976 | 32 |
| FOETAL EXPOSURE DURING PREGNANCY                 | 10071404 | 32 |
| AUSCULTATION                                     | 10076270 | 32 |
| IMMATURE GRANULOCYTE COUNT INCREASED             | 10081727 | 32 |
| REFLEX TEST                                      | 10082738 | 32 |
| PARANASAL SINUS INFLAMMATION                     | 10083836 | 32 |
| TRI-IODOTHYRONINE FREE                           | 10053792 | 32 |
| THYROXINE FREE INCREASED                         | 10055163 | 32 |
| POST VIRAL FATIGUE SYNDROME                      | 10057244 | 32 |
| TROPONIN T INCREASED                             | 10058269 | 32 |
| SKIN TEST NEGATIVE                               | 10060888 | 32 |
| BRAIN OPERATION                                  | 10061732 | 32 |
| ORTHOSTATIC INTOLERANCE                          | 10063927 | 32 |
| TONSILLAR INFLAMMATION                           | 10065169 | 32 |
| ABORTION MISSED                                  | 10000230 | 31 |
| ACNE CYSTIC                                      | 10000503 | 31 |
| BIOPSY SKIN NORMAL                               | 10004875 | 31 |
| BLOOD PRESSURE DIASTOLIC INCREASED               | 10005739 | 31 |
| BRONCHOSCOPY ABNORMAL                            | 10006480 | 31 |
| CHOLECYSTITIS ACUTE                              | 10008614 | 31 |
| CHRONIC RESPIRATORY FAILURE                      | 10009126 | 31 |
| CREATININE RENAL CLEARANCE DECREASED             | 10011372 | 31 |
| EPINEPHRINE                                      | 10015060 | 31 |
| ESSENTIAL TREMOR                                 | 10015496 | 31 |
| GRANULOMA                                        | 10018691 | 31 |
| HAEMOLYSIS                                       | 10018910 | 31 |
| HERNIA                                           | 10019909 | 31 |
| HYPERCOAGULATION                                 | 10020608 | 31 |
| PAROTID GLAND ENLARGEMENT                        | 10034023 | 31 |
| POST-TRAUMATIC STRESS DISORDER                   | 10036316 | 31 |
| PURULENT DISCHARGE                               | 10037569 | 31 |
| RETINAL TEAR                                     | 10038897 | 31 |
| RHINITIS ALLERGIC                                | 10039085 | 31 |
| SPIROMETRY                                       | 10041629 | 31 |
| TRI-IODOTHYRONINE NORMAL                         | 10044598 | 31 |

|                                              |          |    |
|----------------------------------------------|----------|----|
| URINARY TRACT DISORDER                       | 10046566 | 31 |
| VITAMIN B12 INCREASED                        | 10047610 | 31 |
| WOUND SECRETION                              | 10048629 | 31 |
| LIVE BIRTH                                   | 10049550 | 31 |
| THIRST DECREASED                             | 10050200 | 31 |
| OVULATION DISORDER                           | 10067490 | 31 |
| CLOSTRIDIUM TEST NEGATIVE                    | 10070271 | 31 |
| TILT TABLE TEST POSITIVE                     | 10072467 | 31 |
| NONINFECTIVE ENCEPHALITIS                    | 10074712 | 31 |
| CSF RED BLOOD CELL COUNT POSITIVE            | 10075562 | 31 |
| HERPES SIMPLEX TEST POSITIVE                 | 10077969 | 31 |
| NASAL INJURY                                 | 10078651 | 31 |
| MAGNETIC RESONANCE IMAGING THORACIC ABNORMAL | 10083143 | 31 |
| INCISIONAL DRAINAGE                          | 10052532 | 31 |
| WALKING DISABILITY                           | 10053204 | 31 |
| HISTAMINE LEVEL                              | 10060029 | 31 |
| VOCAL CORD DISORDER                          | 10061581 | 31 |
| HEPATIC LESION                               | 10061998 | 31 |
| OVERSENSING                                  | 10063834 | 31 |
| ABORTION INDUCED                             | 10000220 | 30 |
| ACUTE SINUSITIS                              | 10001076 | 30 |
| BEHAVIOUR DISORDER                           | 10004207 | 30 |
| BLOOD PROLACTIN                              | 10005777 | 30 |
| CULTURE THROAT NEGATIVE                      | 10011633 | 30 |
| DIVERTICULUM INTESTINAL                      | 10013559 | 30 |
| ENTERITIS                                    | 10014866 | 30 |
| HAEMOLYTIC ANAEMIA                           | 10018916 | 30 |
| LEUKAEMIA                                    | 10024288 | 30 |
| NARCOLEPSY                                   | 10028713 | 30 |
| ON AND OFF PHENOMENON                        | 10030312 | 30 |
| PLASMA CELL MYELOMA                          | 10035226 | 30 |
| PLATELET DISORDER                            | 10035532 | 30 |
| SOMNAMBULISM                                 | 10041347 | 30 |
| WOUND INFECTION                              | 10048038 | 30 |
| MOUTH INJURY                                 | 10049294 | 30 |
| STAPHYLOCOCCAL BACTERAEMIA                   | 10051017 | 30 |
| MADAROSIS                                    | 10051235 | 30 |
| POSTMENOPAUSE                                | 10051775 | 30 |
| VERTEBRAL FORAMINAL STENOSIS                 | 10069690 | 30 |
| INFLUENZA B VIRUS TEST POSITIVE              | 10070208 | 30 |
| FUNGAL TEST NEGATIVE                         | 10070458 | 30 |
| RIGHT VENTRICULAR DILATATION                 | 10074222 | 30 |
| LANGUAGE DISORDER                            | 10074869 | 30 |

|                                            |          |    |
|--------------------------------------------|----------|----|
| RHEUMATOLOGICAL EXAMINATION                | 10084263 | 30 |
| HAEMOFILTRATION                            | 10053090 | 30 |
| CARDIAC IMAGING PROCEDURE                  | 10053451 | 30 |
| CARDIAC IMAGING PROCEDURE NORMAL           | 10053452 | 30 |
| TONSILLAR DISORDER                         | 10053477 | 30 |
| CSF WHITE BLOOD CELL COUNT INCREASED       | 10053805 | 30 |
| NUCHAL RIGIDITY                            | 10058483 | 30 |
| HAND DERMATITIS                            | 10058898 | 30 |
| BLOOD SMEAR TEST                           | 10059655 | 30 |
| URINE OUTPUT INCREASED                     | 10059896 | 30 |
| TOXICOLOGIC TEST                           | 10061384 | 30 |
| HERPES OPHTHALMIC                          | 10062004 | 30 |
| AGONAL RESPIRATION                         | 10085467 | 30 |
| ACUTE MYELOID LEUKAEMIA                    | 10000880 | 29 |
| ADRENAL DISORDER                           | 10001347 | 29 |
| AMYOTROPHIC LATERAL SCLEROSIS              | 10002026 | 29 |
| ANTIPHOSPHOLIPID SYNDROME                  | 10002817 | 29 |
| ATRIOVENTRICULAR BLOCK SECOND DEGREE       | 10003677 | 29 |
| AUDITORY DISORDER                          | 10003778 | 29 |
| BREAST INDURATION                          | 10006258 | 29 |
| CHANGE OF BOWEL HABIT                      | 10008399 | 29 |
| CORONARY ARTERY BYPASS                     | 10011077 | 29 |
| HYPOCALCAEMIA                              | 10020947 | 29 |
| LARYNGOSCOPY                               | 10023888 | 29 |
| MEDICAL DIET                               | 10027087 | 29 |
| MELANOCYTIC NAEVUS                         | 10027145 | 29 |
| PREMATURE BABY                             | 10036590 | 29 |
| TRICHORRHEXIS                              | 10044625 | 29 |
| VULVAL DISORDER                            | 10047754 | 29 |
| BLADDER SPASM                              | 10048994 | 29 |
| CORRECTIVE LENS USER                       | 10050858 | 29 |
| CORONAVIRUS INFECTION                      | 10051905 | 29 |
| REGURGITATION                              | 10067171 | 29 |
| BRONCHIAL WALL THICKENING                  | 10067182 | 29 |
| PRODUCT LABEL CONFUSION                    | 10069273 | 29 |
| FUNGAL TEST                                | 10070457 | 29 |
| SENSITISATION                              | 10070834 | 29 |
| THYROID STIMULATING IMMUNOGLOBULIN         | 10071388 | 29 |
| VACCINATION SITE JOINT MOVEMENT IMPAIRMENT | 10076175 | 29 |
| X-RAY DENTAL NORMAL                        | 10079994 | 29 |
| RECALLED PRODUCT ADMINISTERED              | 10081540 | 29 |
| MUSCLE STRENGTH ABNORMAL                   | 10082799 | 29 |
| INJECTION SITE JOINT MOVEMENT IMPAIRMENT   | 10053979 | 29 |

|                                       |          |    |
|---------------------------------------|----------|----|
| BLOODY DISCHARGE                      | 10057687 | 29 |
| VITAMIN B1                            | 10058766 | 29 |
| COMPUTERISED TOMOGRAM CORONARY ARTERY | 10060804 | 29 |
| TRIGEMINAL NERVE DISORDER             | 10060890 | 29 |
| FOETAL DISORDER                       | 10061157 | 29 |
| SKIN INJURY                           | 10061364 | 29 |
| EYE OPERATION                         | 10061852 | 29 |
| FLUID REPLACEMENT                     | 10061858 | 29 |
| NECK INJURY                           | 10062211 | 29 |
| SPIDER VEIN                           | 10062696 | 29 |
| ANTI-THYROID ANTIBODY INCREASED       | 10085912 | 29 |
| ANGIOPLASTY                           | 10002475 | 28 |
| BLOOD URIC ACID INCREASED             | 10005861 | 28 |
| ECTOPIC PREGNANCY                     | 10014166 | 28 |
| ELECTRONYSTAGMOGRAM                   | 10014449 | 28 |
| GASTRIC ULCER                         | 10017822 | 28 |
| NAIL DISORDER                         | 10028694 | 28 |
| NERVE STIMULATION TEST                | 10029191 | 28 |
| OPTIC ISCHAEMIC NEUROPATHY            | 10030924 | 28 |
| SCLERITIS                             | 10039705 | 28 |
| THYROID PAIN                          | 10043757 | 28 |
| UTERINE POLYP                         | 10046811 | 28 |
| TRANSFERRIN SATURATION DECREASED      | 10050770 | 28 |
| BETA-2 GLYCOPROTEIN ANTIBODY          | 10066403 | 28 |
| DEBRIDEMENT                           | 10067806 | 28 |
| ULTRASOUND UTERUS NORMAL              | 10074417 | 28 |
| PRODUCT AVAILABILITY ISSUE            | 10077800 | 28 |
| MUCOSAL HYPERTROPHY                   | 10079674 | 28 |
| CATHETER DIRECTED THROMBOLYSIS        | 10085325 | 28 |
| OPTICAL COHERENCE TOMOGRAPHY          | 10057208 | 28 |
| QRS AXIS ABNORMAL                     | 10057624 | 28 |
| HYPERTENSIVE EMERGENCY                | 10058179 | 28 |
| BRAIN NEOPLASM                        | 10061019 | 28 |
| EMBOLISM                              | 10061169 | 28 |
| GASTROINTESTINAL MOTILITY DISORDER    | 10061173 | 28 |
| MASS EXCISION                         | 10061560 | 28 |
| STEROID THERAPY                       | 10062117 | 28 |
| IMMUNOLOGY TEST NORMAL                | 10062502 | 28 |
| THALAMIC INFARCTION                   | 10064961 | 28 |
| HEPATITIS B TEST NEGATIVE             | 10065002 | 28 |
| APRAXIA                               | 10003062 | 27 |
| BILIRUBIN CONJUGATED                  | 10004684 | 27 |
| BLOOD IMMUNOGLOBULIN G DECREASED      | 10005595 | 27 |



|                                       |          |    |
|---------------------------------------|----------|----|
| BLOOD IMMUNOGLOBULIN G INCREASED      | 10005596 | 27 |
| DECREASED INTEREST                    | 10011971 | 27 |
| FUNGAL SKIN INFECTION                 | 10017543 | 27 |
| HIGH DENSITY LIPOPROTEIN NORMAL       | 10020062 | 27 |
| MITRAL VALVE PROLAPSE                 | 10027730 | 27 |
| OVULATION PAIN                        | 10033314 | 27 |
| PANCREATIC DISORDER                   | 10033616 | 27 |
| PELVIC VENOUS THROMBOSIS              | 10034272 | 27 |
| PHYSIOTHERAPY                         | 10034998 | 27 |
| POSTPARTUM HAEMORRHAGE                | 10036417 | 27 |
| PYURIA                                | 10037686 | 27 |
| RADICULITIS BRACHIAL                  | 10037778 | 27 |
| SLEEP PARALYSIS                       | 10041002 | 27 |
| SNORING                               | 10041235 | 27 |
| STATUS EPILEPTICUS                    | 10041962 | 27 |
| SUBCUTANEOUS ABSCESS                  | 10042343 | 27 |
| THROMBOCYTOSIS                        | 10043563 | 27 |
| THYROXINE INCREASED                   | 10043818 | 27 |
| TYMPANOMETRY                          | 10045214 | 27 |
| ONYCHOCLASIS                          | 10048886 | 27 |
| BRAIN DEATH                           | 10049054 | 27 |
| SUBCLAVIAN VEIN THROMBOSIS            | 10049446 | 27 |
| EXPOSURE TO COMMUNICABLE DISEASE      | 10049711 | 27 |
| ALDOLASE                              | 10050286 | 27 |
| ANTITHROMBIN III                      | 10050640 | 27 |
| ENDODONTIC PROCEDURE                  | 10051085 | 27 |
| ENDOMETRIAL ABLATION                  | 10051908 | 27 |
| BETA-2 GLYCOPROTEIN ANTIBODY NEGATIVE | 10066405 | 27 |
| VARICELLA VIRUS TEST POSITIVE         | 10070214 | 27 |
| DIFFUSE ALOPECIA                      | 10073736 | 27 |
| COMPLICATION ASSOCIATED WITH DEVICE   | 10077107 | 27 |
| INTRACRANIAL MASS                     | 10077667 | 27 |
| PROHORMONE BRAIN NATRIURETIC PEPTIDE  | 10077780 | 27 |
| FOOD REFUSAL                          | 10080283 | 27 |
| CONTINUOUS POSITIVE AIRWAY PRESSURE   | 10052934 | 27 |
| CARDIAC ASSISTANCE DEVICE USER        | 10053686 | 27 |
| MINERAL SUPPLEMENTATION               | 10053963 | 27 |
| POST PROCEDURAL COMPLICATION          | 10058046 | 27 |
| PCO2 NORMAL                           | 10058983 | 27 |
| CSF TEST NORMAL                       | 10059702 | 27 |
| LIMB OPERATION                        | 10061226 | 27 |
| TOXICOLOGIC TEST NORMAL               | 10061383 | 27 |
| EUSTACHIAN TUBE DISORDER              | 10061462 | 27 |

|                                           |          |    |
|-------------------------------------------|----------|----|
| COLECTOMY                                 | 10061778 | 27 |
| BLOOD HOMOCYSTEINE                        | 10062994 | 27 |
| INJECTION SITE INJURY                     | 10066083 | 27 |
| ACCIDENT                                  | 10000369 | 26 |
| BIOPSY LUNG                               | 10004794 | 26 |
| BIOPSY THYROID GLAND                      | 10004888 | 26 |
| BLOOD OESTROGEN                           | 10005684 | 26 |
| BLOOD TESTOSTERONE                        | 10005811 | 26 |
| CHRONIC LYMPHOCYTIC LEUKAEMIA             | 10008958 | 26 |
| COAGULATION TIME                          | 10009790 | 26 |
| ENDOSCOPY UPPER GASTROINTESTINAL TRACT    | 10014819 | 26 |
| EOSINOPHILIA                              | 10014950 | 26 |
| EXTRAOCULAR MUSCLE PARESIS                | 10015829 | 26 |
| FEBRILE NEUTROPENIA                       | 10016288 | 26 |
| HAIR DISORDER                             | 10019037 | 26 |
| HEPATITIS C ANTIBODY NEGATIVE             | 10019746 | 26 |
| PEMPHIGUS                                 | 10034280 | 26 |
| SMEAR CERVIX ABNORMAL                     | 10041206 | 26 |
| KNEE OPERATION                            | 10049548 | 26 |
| INJECTION SITE DRYNESS                    | 10067252 | 26 |
| RESPIRATORY SYNCYTIAL VIRUS TEST POSITIVE | 10068563 | 26 |
| VACCINATION SITE HYPERSENSITIVITY         | 10068880 | 26 |
| PRODUCT QUALITY ISSUE                     | 10069327 | 26 |
| VACCINATION SITE SCAB                     | 10069618 | 26 |
| FAECAL CALPROTECTIN                       | 10069670 | 26 |
| MENSTRUATION NORMAL                       | 10070933 | 26 |
| HUMAN CHORIONIC GONADOTROPIN NORMAL       | 10071334 | 26 |
| ENZYME LEVEL TEST                         | 10072233 | 26 |
| EYE COLOUR CHANGE                         | 10072289 | 26 |
| ORAL BLOOD BLISTER                        | 10076590 | 26 |
| EXCESSIVE CERUMEN PRODUCTION              | 10076897 | 26 |
| ADULT FAILURE TO THRIVE                   | 10077257 | 26 |
| ATRIAL ENLARGEMENT                        | 10079340 | 26 |
| THERAPEUTIC PRODUCT EFFECT INCOMPLETE     | 10082200 | 26 |
| CONVALESCENT PLASMA TRANSFUSION           | 10084817 | 26 |
| DIAPHRAGMALGIA                            | 10052749 | 26 |
| CARDIAC TELEMETRY ABNORMAL                | 10053450 | 26 |
| EAR, NOSE AND THROAT EXAMINATION NORMAL   | 10056847 | 26 |
| ENDOCRINE OPHTHALMOPATHY                  | 10060742 | 26 |
| VENOUS THROMBOSIS LIMB                    | 10061408 | 26 |
| WHITE BLOOD CELL DISORDER                 | 10061414 | 26 |
| ORAL MUCOSAL EXFOLIATION                  | 10064487 | 26 |
| PERCUTANEOUS CORONARY INTERVENTION        | 10065608 | 26 |

|                                                |          |    |
|------------------------------------------------|----------|----|
| VACCINATION SITE PAPULE                        | 10066046 | 26 |
| BRONCHIAL HYPERREACTIVITY                      | 10066091 | 26 |
| ACUTE DISSEMINATED ENCEPHALOMYELITIS           | 10000709 | 25 |
| ACUTE HEPATIC FAILURE                          | 10000804 | 25 |
| ADRENAL INSUFFICIENCY                          | 10001367 | 25 |
| ALBUMIN GLOBULIN RATIO DECREASED               | 10001565 | 25 |
| ASPARTATE AMINOTRANSFERASE DECREASED           | 10003479 | 25 |
| ATROPHY                                        | 10003694 | 25 |
| B-CELL LYMPHOMA                                | 10003899 | 25 |
| BLOOD FOLLICLE STIMULATING HORMONE NORMAL      | 10005535 | 25 |
| BLOOD LUTEINISING HORMONE                      | 10005646 | 25 |
| BREAST DISORDER FEMALE                         | 10006229 | 25 |
| CARDIOLIPIN ANTIBODY NEGATIVE                  | 10007629 | 25 |
| CAROTID ARTERY THROMBOSIS                      | 10007688 | 25 |
| CATATONIA                                      | 10007776 | 25 |
| CHILD MALTREATMENT SYNDROME                    | 10008513 | 25 |
| CSF PROTEIN NORMAL                             | 10011576 | 25 |
| DECREASED IMMUNE RESPONSIVENESS                | 10011968 | 25 |
| GINGIVAL DISORDER                              | 10018280 | 25 |
| GRAM STAIN                                     | 10018654 | 25 |
| HEART SOUNDS ABNORMAL                          | 10019311 | 25 |
| LAGOPHTHALMOS                                  | 10023683 | 25 |
| MYELITIS                                       | 10028524 | 25 |
| PHARYNGEAL ULCERATION                          | 10034834 | 25 |
| POLYCYSTIC OVARIES                             | 10036049 | 25 |
| RENAL INFARCT                                  | 10038470 | 25 |
| SCLERODERMA                                    | 10039710 | 25 |
| SERUM SICKNESS                                 | 10040400 | 25 |
| SPUTUM INCREASED                               | 10041812 | 25 |
| SUPERIOR SAGITTAL SINUS THROMBOSIS             | 10042567 | 25 |
| THROMBOLYSIS                                   | 10043568 | 25 |
| TOOTH LOSS                                     | 10044044 | 25 |
| VENOUS THROMBOSIS                              | 10047249 | 25 |
| WRIST FRACTURE                                 | 10048049 | 25 |
| PHYSICAL DISABILITY                            | 10048624 | 25 |
| PROTEIN S                                      | 10050417 | 25 |
| BLOOD UREA NITROGEN/CREATININE RATIO INCREASED | 10050760 | 25 |
| WOUND HAEMORRHAGE                              | 10051373 | 25 |
| INNER EAR INFLAMMATION                         | 10066966 | 25 |
| ADVERSE EVENT FOLLOWING IMMUNISATION           | 10069520 | 25 |
| VIRAL TITRE                                    | 10070252 | 25 |
| AMYLASE NORMAL                                 | 10072328 | 25 |
| VEIN RUPTURE                                   | 10077110 | 25 |

|                                           |          |    |
|-------------------------------------------|----------|----|
| MUCOSAL DISORDER                          | 10082268 | 25 |
| ELECTROCARDIOGRAM ST-T SEGMENT ABNORMAL   | 10052333 | 25 |
| PATIENT ISOLATION                         | 10053315 | 25 |
| EXPLORATIVE LAPAROTOMY                    | 10053361 | 25 |
| ANTIPLATELET THERAPY                      | 10053460 | 25 |
| EPSTEIN-BARR VIRUS ANTIBODY NEGATIVE      | 10053818 | 25 |
| EAR, NOSE AND THROAT EXAMINATION ABNORMAL | 10056848 | 25 |
| HEPATIC MASS                              | 10057110 | 25 |
| ANXIETY DISORDER                          | 10057666 | 25 |
| BIPOLAR DISORDER                          | 10057667 | 25 |
| PSYCHOGENIC SEIZURE                       | 10058895 | 25 |
| SPINAL CORD DISORDER                      | 10061367 | 25 |
| WOUND TREATMENT                           | 10062932 | 25 |
| EFFUSION                                  | 10063045 | 25 |
| EAR INFLAMMATION                          | 10085924 | 25 |
| ADRENOCORTICAL INSUFFICIENCY ACUTE        | 10001389 | 24 |
| ASPIRATION JOINT                          | 10003517 | 24 |
| BITE                                      | 10004966 | 24 |
| BLOOD IMMUNOGLOBULIN E INCREASED          | 10005591 | 24 |
| BLOOD PROLACTIN NORMAL                    | 10005781 | 24 |
| CLAUSTROPHOBIA                            | 10009244 | 24 |
| DERMAL CYST                               | 10012426 | 24 |
| DIZZINESS EXERTIONAL                      | 10013576 | 24 |
| EMBOLISM VENOUS                           | 10014522 | 24 |
| FEBRILE CONVULSION                        | 10016284 | 24 |
| FLUID OVERLOAD                            | 10016803 | 24 |
| GUTTATE PSORIASIS                         | 10018797 | 24 |
| HIGH DENSITY LIPOPROTEIN                  | 10020050 | 24 |
| HYPOALBUMINAEMIA                          | 10020942 | 24 |
| INFERTILITY FEMALE                        | 10021928 | 24 |
| INTESTINAL ISCHAEMIA                      | 10022680 | 24 |
| MASTECTOMY                                | 10026878 | 24 |
| MUCOSAL DRYNESS                           | 10028111 | 24 |
| NOCTURIA                                  | 10029446 | 24 |
| OTITIS EXTERNA                            | 10033072 | 24 |
| PERIPHERAL SENSORY NEUROPATHY             | 10034620 | 24 |
| PRURITUS GENITAL                          | 10037093 | 24 |
| STEVENS-JOHNSON SYNDROME                  | 10042033 | 24 |
| TORTICOLLIS                               | 10044074 | 24 |
| TYMPANIC MEMBRANE PERFORATION             | 10045210 | 24 |
| VESTIBULAR FUNCTION TEST                  | 10047389 | 24 |
| CAROTID ARTERY OCCLUSION                  | 10048964 | 24 |
| CERVICAL RADICULOPATHY                    | 10050217 | 24 |

|                                                     |          |    |
|-----------------------------------------------------|----------|----|
| LEFT ATRIAL DILATATION                              | 10067286 | 24 |
| ANTI-CYCLIC CITRULLINATED PEPTIDE ANTIBODY POSITIVE | 10068798 | 24 |
| HUMAN RHINOVIRUS TEST POSITIVE                      | 10070249 | 24 |
| RESPIRATORY TRACT OEDEMA                            | 10070774 | 24 |
| EGFR STATUS ASSAY                                   | 10071955 | 24 |
| DERMAL FILLER INJECTION                             | 10072349 | 24 |
| INVASIVE DUCTAL BREAST CARCINOMA                    | 10073095 | 24 |
| THERAPY CHANGE                                      | 10074300 | 24 |
| ADVERSE FOOD REACTION                               | 10077759 | 24 |
| DENTAL PARAESTHESIA                                 | 10078276 | 24 |
| LYMPHATIC DISORDER                                  | 10052314 | 24 |
| ADRENAL MASS                                        | 10053235 | 24 |
| OFFICE VISIT                                        | 10053323 | 24 |
| FAECALOMA                                           | 10056325 | 24 |
| CONGESTIVE CARDIOMYOPATHY                           | 10056370 | 24 |
| FOOD CRAVING                                        | 10056465 | 24 |
| PERIPHERAL ARTERY OCCLUSION                         | 10057525 | 24 |
| CARDIAC OPERATION                                   | 10061026 | 24 |
| FINGER DEFORMITY                                    | 10061156 | 24 |
| HAND DEFORMITY                                      | 10061194 | 24 |
| INFARCTION                                          | 10061216 | 24 |
| LICHENOID KERATOSIS                                 | 10064000 | 24 |
| THROMBOEMBOLECTOMY                                  | 10064958 | 24 |
| AMNIOCENTESIS                                       | 10001958 | 23 |
| ANOVULATORY CYCLE                                   | 10002659 | 23 |
| BLOOD CREATINE NORMAL                               | 10005466 | 23 |
| BLOOD FOLLICLE STIMULATING HORMONE INCREASED        | 10005534 | 23 |
| BLOOD GROUPING                                      | 10005569 | 23 |
| CEREBELLAR INFARCTION                               | 10008034 | 23 |
| CORONARY ARTERY THROMBOSIS                          | 10011091 | 23 |
| CSF CULTURE                                         | 10011527 | 23 |
| CSF PROTEIN                                         | 10011572 | 23 |
| EPSTEIN-BARR VIRUS INFECTION REACTIVATION           | 10015109 | 23 |
| EYELID SENSORY DISORDER                             | 10015999 | 23 |
| HYPERCALCAEMIA                                      | 10020583 | 23 |
| HYPERTONIC BLADDER                                  | 10020853 | 23 |
| IMMUNOGLOBULINS                                     | 10021496 | 23 |
| INFLAMMATORY BOWEL DISEASE                          | 10021972 | 23 |
| JOINT INJECTION                                     | 10023218 | 23 |
| MACULAR DEGENERATION                                | 10025409 | 23 |
| MESENTERIC VEIN THROMBOSIS                          | 10027402 | 23 |
| MUCOSAL INFLAMMATION                                | 10028116 | 23 |
| NONSPECIFIC REACTION                                | 10029719 | 23 |

|                                         |          |    |
|-----------------------------------------|----------|----|
| PAROTITIS                               | 10034038 | 23 |
| RENAL TUBULAR NECROSIS                  | 10038540 | 23 |
| SUBMAXILLARY GLAND ENLARGEMENT          | 10042419 | 23 |
| ULTRASOUND LIVER ABNORMAL               | 10045428 | 23 |
| URINARY SYSTEM X-RAY                    | 10046558 | 23 |
| VIRAL UPPER RESPIRATORY TRACT INFECTION | 10047482 | 23 |
| DRUG SCREEN POSITIVE                    | 10049177 | 23 |
| HAPTOGLOBIN                             | 10050744 | 23 |
| TRANSFERRIN SATURATION                  | 10051007 | 23 |
| BASOPHIL PERCENTAGE INCREASED           | 10052220 | 23 |
| PHARYNGEAL DISORDER                     | 10067353 | 23 |
| POTENTIATING DRUG INTERACTION           | 10068072 | 23 |
| HYPERTRANSAMINASAEMIA                   | 10068237 | 23 |
| ANORECTAL DISCOMFORT                    | 10068286 | 23 |
| BODY TEMPERATURE NORMAL                 | 10069600 | 23 |
| STRESS ECHOCARDIOGRAM NORMAL            | 10070745 | 23 |
| CARDIOVASCULAR SYMPTOM                  | 10075534 | 23 |
| HLA-B*27 ASSAY                          | 10078439 | 23 |
| REDUCED FACIAL EXPRESSION               | 10078576 | 23 |
| HEMIPARAESTHESIA                        | 10078746 | 23 |
| ANEMBRYONIC GESTATION                   | 10079814 | 23 |
| TROPONIN ABNORMAL                       | 10084979 | 23 |
| FIRST TRIMESTER PREGNANCY               | 10052395 | 23 |
| EPSTEIN-BARR VIRUS ANTIBODY             | 10053817 | 23 |
| HELICOBACTER INFECTION                  | 10054263 | 23 |
| TOBACCO USER                            | 10057581 | 23 |
| ANTIACETYLCHOLINE RECEPTOR ANTIBODY     | 10059956 | 23 |
| AUTOANTIBODY TEST                       | 10060972 | 23 |
| SCAN THYROID GLAND                      | 10061508 | 23 |
| OCCULT BLOOD                            | 10061878 | 23 |
| PHYSICAL EXAMINATION NORMAL             | 10062079 | 23 |
| MULTIMORBIDITY                          | 10063914 | 23 |
| AMYLASE INCREASED                       | 10002016 | 22 |
| AZOTAEMIA                               | 10003885 | 22 |
| BIOPSY LYMPH GLAND ABNORMAL             | 10004798 | 22 |
| BLOOD IMMUNOGLOBULIN M INCREASED        | 10005601 | 22 |
| BRAIN HERNIATION                        | 10006126 | 22 |
| BREATH ODOUR                            | 10006326 | 22 |
| ENDOCARDITIS                            | 10014665 | 22 |
| GASTRIC DILATATION                      | 10017779 | 22 |
| GLOMERULAR FILTRATION RATE INCREASED    | 10018359 | 22 |
| HYPOREFLEXIA                            | 10021089 | 22 |
| ILEUS                                   | 10021328 | 22 |

|                                            |          |    |
|--------------------------------------------|----------|----|
| ILLUSION                                   | 10021403 | 22 |
| ISCHAEMIC HEPATITIS                        | 10023025 | 22 |
| LARYNGEAL OEDEMA                           | 10023845 | 22 |
| MONONUCLEOSIS HETEROPHILE TEST POSITIVE    | 10027922 | 22 |
| MORNING SICKNESS                           | 10027975 | 22 |
| NEUTROPHILIA                               | 10029379 | 22 |
| OSTEITIS                                   | 10031149 | 22 |
| PANCREATIC CYST                            | 10033615 | 22 |
| PUPILLARY REFLEX IMPAIRED                  | 10037532 | 22 |
| RETINAL DISORDER                           | 10038853 | 22 |
| SIALOADENITIS                              | 10040628 | 22 |
| ULTRASOUND LIVER NORMAL                    | 10045429 | 22 |
| VULVOVAGINAL DRYNESS                       | 10047791 | 22 |
| CERUMEN REMOVAL                            | 10050336 | 22 |
| CYTOKINE STORM                             | 10050685 | 22 |
| HISTAMINE INTOLERANCE                      | 10068652 | 22 |
| HEPATITIS A VIRUS TEST                     | 10068815 | 22 |
| PRODUCT LOT NUMBER ISSUE                   | 10069266 | 22 |
| BLADDER DYSFUNCTION                        | 10069632 | 22 |
| DOUBLE STRANDED DNA ANTIBODY POSITIVE      | 10069907 | 22 |
| KLEBSIELLA TEST POSITIVE                   | 10070091 | 22 |
| VARICELLA VIRUS TEST                       | 10070444 | 22 |
| CRYPTOCOCCUS TEST                          | 10070456 | 22 |
| COLD-STIMULUS HEADACHE                     | 10071151 | 22 |
| LOWER URINARY TRACT SYMPTOMS               | 10071289 | 22 |
| NASAL DISCHARGE DISCOLOURATION             | 10071553 | 22 |
| HAEMOPHAGOCYtic LYMPHOHISTIOCYTOSIS        | 10071583 | 22 |
| SKIN WOUND                                 | 10072170 | 22 |
| HYPOSMOLAR STATE                           | 10074867 | 22 |
| VACCINATION SITE JOINT PAIN                | 10076176 | 22 |
| CRITICAL ILLNESS                           | 10077264 | 22 |
| NEUROMYELITIS OPTICA SPECTRUM DISORDER     | 10077875 | 22 |
| INTRA-ABDOMINAL FLUID COLLECTION           | 10078659 | 22 |
| PARAESTHESIA EAR                           | 10052433 | 22 |
| ACQUIRED DIAPHRAGMATIC EVENTRATION         | 10059185 | 22 |
| STOOL ANALYSIS ABNORMAL                    | 10059527 | 22 |
| HISTAMINE LEVEL INCREASED                  | 10060051 | 22 |
| ABDOMINAL ABSCESS                          | 10060921 | 22 |
| ULTRASOUND THYROID NORMAL                  | 10060988 | 22 |
| CSF WHITE BLOOD CELL COUNT                 | 10061098 | 22 |
| CHEST INJURY                               | 10061386 | 22 |
| GENE MUTATION IDENTIFICATION TEST NEGATIVE | 10063479 | 22 |
| JOINT INSTABILITY                          | 10064931 | 22 |

|                                    |          |    |
|------------------------------------|----------|----|
| ORTHOSTATIC HYPERTENSION           | 10065508 | 22 |
| ACUTE PULMONARY OEDEMA             | 10001029 | 21 |
| ANAEMIA MACROCYTIC                 | 10002064 | 21 |
| APTALISM                           | 10003068 | 21 |
| ARTERIAL THROMBOSIS                | 10003178 | 21 |
| BIOPSY MUSCLE                      | 10004802 | 21 |
| BLOOD FIBRINOGEN DECREASED         | 10005520 | 21 |
| BLOOD GASES NORMAL                 | 10005540 | 21 |
| COLON CANCER                       | 10009944 | 21 |
| CORTISOL NORMAL                    | 10011209 | 21 |
| DEAFNESS TRANSITORY                | 10011900 | 21 |
| ENDOMETRIAL HYPERPLASIA            | 10014755 | 21 |
| GASTROINTESTINAL INFECTION         | 10017964 | 21 |
| GENERALISED ANXIETY DISORDER       | 10018075 | 21 |
| LIP ULCERATION                     | 10024572 | 21 |
| MYELOPATHY                         | 10028570 | 21 |
| OBSESSIVE-COMPULSIVE DISORDER      | 10029898 | 21 |
| PERICARDIAL EXCISION               | 10034475 | 21 |
| PERIPHERAL ISCHAEMIA               | 10034576 | 21 |
| PLACENTAL DISORDER                 | 10035132 | 21 |
| PO2 INCREASED                      | 10035769 | 21 |
| POLYNEUROPATHY                     | 10036105 | 21 |
| PROTHROMBIN TIME SHORTENED         | 10037070 | 21 |
| SKIN ATROPHY                       | 10040799 | 21 |
| SPINAL FRACTURE                    | 10041569 | 21 |
| TRI-IODOTHYRONINE DECREASED        | 10044594 | 21 |
| ULTRASOUND BLADDER                 | 10045406 | 21 |
| HYPERVIGILANCE                     | 10048533 | 21 |
| ALCOHOL USE                        | 10048921 | 21 |
| ANAL HAEMORRHAGE                   | 10049555 | 21 |
| URETERAL STENT INSERTION           | 10050307 | 21 |
| MONOCYTE PERCENTAGE DECREASED      | 10052229 | 21 |
| AMNIORRHOEA                        | 10066470 | 21 |
| SUPERFICIAL VEIN PROMINENCE        | 10068717 | 21 |
| BASAL GANGLIA INFARCTION           | 10069020 | 21 |
| PRODUCT EXPIRATION DATE ISSUE      | 10069271 | 21 |
| EHRlichia TEST                     | 10070399 | 21 |
| VULVOVAGINAL RASH                  | 10071588 | 21 |
| VERTEBRAL ARTERY DISSECTION        | 10071716 | 21 |
| OESOPHAGOGASTRODUODENOSCOPY NORMAL | 10072164 | 21 |
| PRONE POSITION                     | 10074744 | 21 |
| VACCINATION SITE DYSAESTHESIA      | 10076160 | 21 |
| COMPRESSION GARMENT APPLICATION    | 10079209 | 21 |



|                                                 |          |    |
|-------------------------------------------------|----------|----|
| WRONG PATIENT RECEIVED PRODUCT                  | 10081577 | 21 |
| PHANTOM LIMB SYNDROME                           | 10082544 | 21 |
| ORGAN FAILURE                                   | 10053159 | 21 |
| TRI-iodothyronine FREE NORMAL                   | 10053793 | 21 |
| THYROXINE FREE DECREASED                        | 10055162 | 21 |
| EYE LASER SURGERY                               | 10057105 | 21 |
| AORTIC DILATATION                               | 10057453 | 21 |
| VIRAL TEST POSITIVE                             | 10059424 | 21 |
| FRACTION OF INSPIRED OXYGEN                     | 10059883 | 21 |
| PERIPHERAL EMBOLISM                             | 10061340 | 21 |
| RHINOVIRUS INFECTION                            | 10061494 | 21 |
| BIOPSY UTERUS                                   | 10061697 | 21 |
| DEMYELINATING POLYNEUROPATHY                    | 10061811 | 21 |
| PULMONARY FUNCTION TEST DECREASED               | 10061922 | 21 |
| BRAIN SCAN ABNORMAL                             | 10061943 | 21 |
| INCREASED BRONCHIAL SECRETION                   | 10062530 | 21 |
| INTERLEUKIN LEVEL                               | 10063321 | 21 |
| ULTRASOUND JOINT                                | 10063568 | 21 |
| DEVICE MALFUNCTION                              | 10063829 | 21 |
| BRONCHIAL DISORDER                              | 10064913 | 21 |
| LOOSE TOOTH                                     | 10065612 | 21 |
| MYOCARDIAL INJURY                               | 10085879 | 21 |
| ABDOMINAL MASS                                  | 10000077 | 20 |
| AORTIC THROMBOSIS                               | 10002910 | 20 |
| APLASTIC ANAEMIA                                | 10002967 | 20 |
| BEHCET'S SYNDROME                               | 10004213 | 20 |
| BLOOD COPPER                                    | 10005439 | 20 |
| BLOOD IMMUNOGLOBULIN A NORMAL                   | 10005587 | 20 |
| BLOOD OESTROGEN DECREASED                       | 10005687 | 20 |
| BREAST ENGORGEMENT                              | 10006240 | 20 |
| CARDIOLIPIN ANTIBODY POSITIVE                   | 10007630 | 20 |
| CERVICAL SPINAL STENOSIS                        | 10008313 | 20 |
| CREATININE RENAL CLEARANCE                      | 10011371 | 20 |
| DEREALISATION                                   | 10012422 | 20 |
| DREAMY STATE                                    | 10013634 | 20 |
| ENDOSCOPY UPPER GASTROINTESTINAL TRACT ABNORMAL | 10014820 | 20 |
| GLUCOSE URINE PRESENT                           | 10018478 | 20 |
| HAEMANGIOMA                                     | 10018814 | 20 |
| HEPATIC ENCEPHALOPATHY                          | 10019660 | 20 |
| HYPERKERATOSIS                                  | 10020649 | 20 |
| INTRAVENTRICULAR HAEMORRHAGE                    | 10022840 | 20 |
| LARYNGOSPASM                                    | 10023891 | 20 |
| MASSAGE                                         | 10026871 | 20 |

|                                           |          |    |
|-------------------------------------------|----------|----|
| MENINGITIS VIRAL                          | 10027260 | 20 |
| NECROSIS                                  | 10028851 | 20 |
| OESOPHAGEAL ACHALASIA                     | 10030136 | 20 |
| OPEN REDUCTION OF FRACTURE                | 10030682 | 20 |
| OPHTHALMOPLEGIA                           | 10030875 | 20 |
| OVULATION DELAYED                         | 10033310 | 20 |
| PATHOGEN RESISTANCE                       | 10034133 | 20 |
| PREMATURE MENOPAUSE                       | 10036601 | 20 |
| RUPTURED CEREBRAL ANEURYSM                | 10039330 | 20 |
| SKIN CANCER                               | 10040808 | 20 |
| SPLEEN DISORDER                           | 10041633 | 20 |
| URINARY CASTS                             | 10046533 | 20 |
| VASCULAR INJURY                           | 10047080 | 20 |
| VOCAL CORD PARALYSIS                      | 10047674 | 20 |
| TACHYARRHYTHMIA                           | 10049447 | 20 |
| INJECTION SITE COLDNESS                   | 10050082 | 20 |
| LIGAMENT PAIN                             | 10068790 | 20 |
| INTRADUCTAL PROLIFERATIVE BREAST LESION   | 10073094 | 20 |
| VARICELLA ZOSTER VIRUS INFECTION          | 10075611 | 20 |
| GLUTEN SENSITIVITY                        | 10076493 | 20 |
| ORAL CONTUSION                            | 10078170 | 20 |
| HERPES SIMPLEX REACTIVATION               | 10080137 | 20 |
| SARS-COV-1 TEST POSITIVE                  | 10084446 | 20 |
| POLYPECTOMY                               | 10053308 | 20 |
| CARDIAC TELEMETRY NORMAL                  | 10053449 | 20 |
| CANALITH REPOSITIONING PROCEDURE          | 10053470 | 20 |
| TYPE III IMMUNE COMPLEX MEDIATED REACTION | 10053614 | 20 |
| IMMUNOSUPPRESSANT DRUG THERAPY            | 10054980 | 20 |
| MUSCLE MASS                               | 10056720 | 20 |
| HIV ANTIBODY NEGATIVE                     | 10058762 | 20 |
| BLUE TOE SYNDROME                         | 10059126 | 20 |
| GALACTOSTASIS                             | 10060710 | 20 |
| COMPLEMENT FACTOR                         | 10061055 | 20 |
| METASTATIC NEOPLASM                       | 10061289 | 20 |
| ABDOMEN SCAN                              | 10061936 | 20 |
| THYROIDECTOMY                             | 10062127 | 20 |
| SPINAL OPERATION                          | 10062262 | 20 |
| PERIPHERAL ARTERIAL OCCLUSIVE DISEASE     | 10062585 | 20 |
| REACTION TO PRESERVATIVES                 | 10064788 | 20 |
| INFLAMMATORY PAIN                         | 10065390 | 20 |
| ANIMAL BITE                               | 10002515 | 19 |
| ARTERIOSPASM CORONARY                     | 10003225 | 19 |
| BARIUM SWALLOW                            | 10004124 | 19 |

|                                            |          |    |
|--------------------------------------------|----------|----|
| BASOPHIL COUNT INCREASED                   | 10004169 | 19 |
| BILIRUBIN CONJUGATED INCREASED             | 10004685 | 19 |
| BLOOD CREATINE PHOSPHOKINASE MB INCREASED  | 10005474 | 19 |
| BLOOD PRESSURE DIASTOLIC                   | 10005735 | 19 |
| BLOOD THYROID STIMULATING HORMONE ABNORMAL | 10005830 | 19 |
| CACHEXIA                                   | 10006895 | 19 |
| CARTILAGE INJURY                           | 10007710 | 19 |
| CIRCULATORY COLLAPSE                       | 10009192 | 19 |
| CULTURE WOUND                              | 10011641 | 19 |
| DUPUYTREN'S CONTRACTURE                    | 10013872 | 19 |
| DYSPNOEA PAROXYSMAL NOCTURNAL              | 10013974 | 19 |
| ECZEMA NUMMULAR                            | 10014201 | 19 |
| ERYTHROMELALGIA                            | 10015284 | 19 |
| GAMMA-GLUTAMYLTRANSFERASE                  | 10017687 | 19 |
| GRUNTING                                   | 10018762 | 19 |
| HAEMORRHAGE SUBCUTANEOUS                   | 10018999 | 19 |
| HALLUCINATIONS, MIXED                      | 10019079 | 19 |
| HAND FRACTURE                              | 10019114 | 19 |
| HUMERUS FRACTURE                           | 10020462 | 19 |
| INTESTINAL PERFORATION                     | 10022694 | 19 |
| MICROCYTIC ANAEMIA                         | 10027538 | 19 |
| ORAL CONTRACEPTION                         | 10030970 | 19 |
| PULMONARY HAEMORRHAGE                      | 10037394 | 19 |
| PULMONARY VALVE INCOMPETENCE               | 10037448 | 19 |
| PUPILLARY LIGHT REFLEX TESTS ABNORMAL      | 10037525 | 19 |
| REPETITIVE SPEECH                          | 10038583 | 19 |
| RETICULOCYTE COUNT                         | 10038787 | 19 |
| SHOCK SYMPTOM                              | 10040581 | 19 |
| SYNOVITIS                                  | 10042868 | 19 |
| ULTRASOUND EYE                             | 10045416 | 19 |
| VENTILATION/PERFUSION SCAN ABNORMAL        | 10047265 | 19 |
| VENTILATION/PERFUSION SCAN NORMAL          | 10047266 | 19 |
| ANTIPHOSPHOLIPID ANTIBODIES POSITIVE       | 10048678 | 19 |
| PERICARDIAL FIBROSIS                       | 10048724 | 19 |
| THERMAL BURNS OF EYE                       | 10049267 | 19 |
| SHOCK HAEMORRHAGIC                         | 10049771 | 19 |
| HAEMODYNAMIC INSTABILITY                   | 10052076 | 19 |
| CAROTID ARTERIOSCLEROSIS                   | 10067116 | 19 |
| VACCINATION SITE HAEMATOMA                 | 10069472 | 19 |
| SUBSTANCE USE                              | 10070964 | 19 |
| PUPIL DILATION PROCEDURE                   | 10072352 | 19 |
| OCCUPATIONAL EXPOSURE TO PRODUCT           | 10073311 | 19 |
| ABDOMINAL LYMPHADENOPATHY                  | 10073485 | 19 |

|                                 |          |    |
|---------------------------------|----------|----|
| INTENTIONAL PRODUCT MISUSE      | 10074903 | 19 |
| CEREBRAL CONGESTION             | 10076929 | 19 |
| LACUNAR STROKE                  | 10076994 | 19 |
| PRODUCT DISPENSING ISSUE        | 10081771 | 19 |
| INSULIN THERAPY                 | 10085221 | 19 |
| DIURETIC THERAPY                | 10053073 | 19 |
| SLEEP STUDY ABNORMAL            | 10053320 | 19 |
| ESCHERICHIA BACTERAEMIA         | 10054258 | 19 |
| NASOENDOSCOPY                   | 10055050 | 19 |
| ALLERGY TO ARTHROPOD BITE       | 10058285 | 19 |
| OVARIAN MASS                    | 10058823 | 19 |
| THERAPEUTIC PRODUCT INEFFECTIVE | 10060769 | 19 |
| DNA ANTIBODY                    | 10061131 | 19 |
| DRUG LEVEL                      | 10061823 | 19 |
| OCCULT BLOOD NEGATIVE           | 10061879 | 19 |
| GALLBLADDER ENLARGEMENT         | 10062693 | 19 |
| IMMUNE COMPLEX ASSAY            | 10063326 | 19 |
| CATARACT OPERATION              | 10063797 | 19 |
| BONE CONTUSION                  | 10066251 | 19 |
| ULTRASOUND LYMPH NODES          | 10085635 | 19 |
| AMMONIA NORMAL                  | 10001947 | 18 |
| ANGINA UNSTABLE                 | 10002388 | 18 |
| BIOPSY COLON ABNORMAL           | 10004760 | 18 |
| BLOOD FIBRINOGEN NORMAL         | 10005522 | 18 |
| BLOOD IRON INCREASED            | 10005620 | 18 |
| BLOOD OSMOLARITY NORMAL         | 10005698 | 18 |
| BRAIN STEM INFARCTION           | 10006147 | 18 |
| BREECH PRESENTATION             | 10006356 | 18 |
| BURNS SECOND DEGREE             | 10006802 | 18 |
| CHRONIC SINUSITIS               | 10009137 | 18 |
| COR PULMONALE ACUTE             | 10010969 | 18 |
| CYSTOSCOPY ABNORMAL             | 10011815 | 18 |
| DEATH OF RELATIVE               | 10011931 | 18 |
| DENTAL CARIES                   | 10012318 | 18 |
| DISTRACTIBILITY                 | 10013486 | 18 |
| DYSHIDROTIC ECZEMA              | 10013913 | 18 |
| FACE AND MOUTH X-RAY            | 10016018 | 18 |
| FAECES HARD                     | 10016101 | 18 |
| GANGRENE                        | 10017711 | 18 |
| HYPOVITAMINOSIS                 | 10021135 | 18 |
| MIXED CONNECTIVE TISSUE DISEASE | 10027754 | 18 |
| MONOPARESIS                     | 10027925 | 18 |
| PROLONGED LABOUR                | 10036872 | 18 |

|                                                     |          |    |
|-----------------------------------------------------|----------|----|
| RESPIRATORY ACIDOSIS                                | 10038661 | 18 |
| RETICULOCYTE COUNT INCREASED                        | 10038792 | 18 |
| RETINAL EXUDATES                                    | 10038862 | 18 |
| SICKLE CELL ANAEMIA WITH CRISIS                     | 10040642 | 18 |
| SUBDURAL HAEMORRHAGE                                | 10042364 | 18 |
| TIBIA FRACTURE                                      | 10043827 | 18 |
| UTERINE DISORDER                                    | 10046779 | 18 |
| VITAMIN B6                                          | 10047613 | 18 |
| VOCAL CORD DYSFUNCTION                              | 10047671 | 18 |
| VAGINAL LESION                                      | 10048937 | 18 |
| CREATININE URINE                                    | 10049696 | 18 |
| SPINAL FUSION SURGERY                               | 10050505 | 18 |
| MITRAL VALVE CALCIFICATION                          | 10050558 | 18 |
| HIP SURGERY                                         | 10051060 | 18 |
| CYTOMEGALOVIRUS TEST POSITIVE                       | 10051620 | 18 |
| BLOOD CREATINE PHOSPHOKINASE DECREASED              | 10067760 | 18 |
| UTERINE DILATION AND EVACUATION                     | 10067801 | 18 |
| FASTING                                             | 10068315 | 18 |
| USE OF ACCESSORY RESPIRATORY MUSCLES                | 10069555 | 18 |
| CHLAMYDIA TEST                                      | 10070272 | 18 |
| PARVOVIRUS B19 TEST NEGATIVE                        | 10070365 | 18 |
| PARVOVIRUS B19 TEST                                 | 10070366 | 18 |
| STAPHYLOCOCCUS TEST                                 | 10070412 | 18 |
| UROBILINOGEN URINE INCREASED                        | 10070479 | 18 |
| DRUG REACTION WITH EOSINOPHILIA AND SYSTEMIC SYMPTO | 10073508 | 18 |
| VACCINATION SITE COLDNESS                           | 10076157 | 18 |
| URINARY TRACT DISCOMFORT                            | 10076568 | 18 |
| HEMIANAESTHESIA                                     | 10077170 | 18 |
| URETEROLITHIASIS                                    | 10077989 | 18 |
| TONSILLAR ERYTHEMA                                  | 10078256 | 18 |
| PERFUSION BRAIN SCAN NORMAL                         | 10079704 | 18 |
| LUNG ASSIST DEVICE THERAPY                          | 10082527 | 18 |
| GASTROINTESTINAL PATHOGEN PANEL                     | 10082666 | 18 |
| ULTRASOUND OVARY                                    | 10052602 | 18 |
| INHALATION THERAPY                                  | 10052996 | 18 |
| MEDICAL OBSERVATION                                 | 10053047 | 18 |
| BILIARY DILATATION                                  | 10057202 | 18 |
| FACTOR V LEIDEN MUTATION                            | 10058279 | 18 |
| SPINAL DEFORMITY                                    | 10058907 | 18 |
| VENOUS OCCLUSION                                    | 10058990 | 18 |
| URINE OUTPUT                                        | 10059894 | 18 |
| CARDIOVASCULAR FUNCTION TEST                        | 10060858 | 18 |
| PH BODY FLUID                                       | 10061346 | 18 |

|                                               |          |    |
|-----------------------------------------------|----------|----|
| ANTIBODY TEST NORMAL                          | 10061429 | 18 |
| RENAL INJURY                                  | 10061481 | 18 |
| PARACENTESIS                                  | 10061905 | 18 |
| GENITAL LESION                                | 10061978 | 18 |
| RENAL MASS                                    | 10062104 | 18 |
| PARASITE BLOOD TEST                           | 10063195 | 18 |
| PROGESTERONE DECREASED                        | 10063271 | 18 |
| ALLERGIC RESPIRATORY SYMPTOM                  | 10063527 | 18 |
| VITAL FUNCTIONS ABNORMAL                      | 10063644 | 18 |
| BLOOD COUNT ABNORMAL                          | 10064198 | 18 |
| ABORTION THREATENED                           | 10000242 | 17 |
| BIOPSY BONE MARROW NORMAL                     | 10004739 | 17 |
| BIOPSY LYMPH GLAND NORMAL                     | 10004799 | 17 |
| BLOOD ALBUMIN INCREASED                       | 10005288 | 17 |
| BLOOD PROLACTIN INCREASED                     | 10005780 | 17 |
| BLOOD TESTOSTERONE NORMAL                     | 10005816 | 17 |
| BRONCHITIS CHRONIC                            | 10006458 | 17 |
| CHALAZION                                     | 10008388 | 17 |
| ELECTROPHORESIS PROTEIN NORMAL                | 10014469 | 17 |
| ENDOSCOPY UPPER GASTROINTESTINAL TRACT NORMAL | 10014821 | 17 |
| FEMORAL NECK FRACTURE                         | 10016450 | 17 |
| FIBROSIS                                      | 10016642 | 17 |
| FOREIGN TRAVEL                                | 10017059 | 17 |
| GRANULOCYTE COUNT                             | 10018678 | 17 |
| HAEMOGLOBIN ABNORMAL                          | 10018879 | 17 |
| HAEMORRHOIDS THROMBOSED                       | 10019023 | 17 |
| IDIOPATHIC URTICARIA                          | 10021247 | 17 |
| IGA NEPHROPATHY                               | 10021263 | 17 |
| LEG AMPUTATION                                | 10024124 | 17 |
| LOGORRHOEA                                    | 10024796 | 17 |
| LUMBAR SPINAL STENOSIS                        | 10025005 | 17 |
| MYOPIA                                        | 10028651 | 17 |
| NIPPLE DISORDER                               | 10029417 | 17 |
| PALMAR ERYTHEMA                               | 10033551 | 17 |
| PARASITE STOOL TEST NEGATIVE                  | 10033904 | 17 |
| PLEOCYTOSIS                                   | 10035551 | 17 |
| PO2 NORMAL                                    | 10035770 | 17 |
| POSTURING                                     | 10036437 | 17 |
| PUPILS UNEQUAL                                | 10037538 | 17 |
| RIGHT VENTRICULAR FAILURE                     | 10039163 | 17 |
| SALIVARY GLAND PAIN                           | 10039421 | 17 |
| SALPINGECTOMY                                 | 10039449 | 17 |
| SKIN DEPIGMENTATION                           | 10040825 | 17 |

|                                                  |          |    |
|--------------------------------------------------|----------|----|
| SLIT-LAMP EXAMINATION                            | 10041031 | 17 |
| SPEECH DISORDER DEVELOPMENTAL                    | 10041467 | 17 |
| TARDIVE DYSKINESIA                               | 10043118 | 17 |
| TENDON INJURY                                    | 10043242 | 17 |
| UTERINE CANCER                                   | 10046766 | 17 |
| VASOSPASM                                        | 10047163 | 17 |
| X-RAY WITH CONTRAST UPPER GASTROINTESTINAL TRACT | 10048210 | 17 |
| SACRAL PAIN                                      | 10048710 | 17 |
| WEIGHT FLUCTUATION                               | 10049040 | 17 |
| PNEUMOMEDIASTINUM                                | 10050184 | 17 |
| HEPATITIS B SURFACE ANTIGEN                      | 10050529 | 17 |
| BLOOD PRESSURE INADEQUATELY CONTROLLED           | 10051128 | 17 |
| GENITAL DISCOMFORT                               | 10066887 | 17 |
| JOINT FLUID DRAINAGE                             | 10066994 | 17 |
| DEVICE ISSUE                                     | 10069868 | 17 |
| MYCOPLASMA TEST                                  | 10070411 | 17 |
| VULVOVAGINAL ERYTHEMA                            | 10070437 | 17 |
| UROBILINOGEN URINE DECREASED                     | 10070480 | 17 |
| SUBCHORIONIC HAEMORRHAGE                         | 10071010 | 17 |
| HUMAN CHORIONIC GONADOTROPIN ABNORMAL            | 10071330 | 17 |
| OVARIAN VEIN THROMBOSIS                          | 10072059 | 17 |
| PRETERM PREMATURE RUPTURE OF MEMBRANES           | 10073024 | 17 |
| IMMUNISATION ANXIETY RELATED REACTION            | 10075205 | 17 |
| THUNDERCLAP HEADACHE                             | 10075481 | 17 |
| VACCINATION SITE INJURY                          | 10076169 | 17 |
| VACCINATION SITE ANAESTHESIA                     | 10076192 | 17 |
| STENOSIS                                         | 10076711 | 17 |
| JAW CLICKING                                     | 10077089 | 17 |
| REACTION TO EXCIPIENT                            | 10079925 | 17 |
| MAGNETIC RESONANCE IMAGING THORACIC NORMAL       | 10083141 | 17 |
| PRODUCT DOSE OMISSION IN ERROR                   | 10084404 | 17 |
| SPLINT APPLICATION                               | 10053312 | 17 |
| INTESTINAL RESECTION                             | 10054193 | 17 |
| INTERVERTEBRAL DISC SPACE NARROWING              | 10055041 | 17 |
| BREAST CANCER METASTATIC                         | 10055113 | 17 |
| DEHYDROEPIANDROSTERONE TEST                      | 10056642 | 17 |
| WOUND CLOSURE                                    | 10057679 | 17 |
| REFLUX GASTRITIS                                 | 10057969 | 17 |
| METABOLIC DISORDER                               | 10058097 | 17 |
| ULTRASOUND TESTES                                | 10058847 | 17 |
| OXYGEN CONSUMPTION                               | 10059167 | 17 |
| BLOOD SMEAR TEST ABNORMAL                        | 10059665 | 17 |
| CYTOGENETIC ANALYSIS                             | 10059882 | 17 |

|                                              |          |    |
|----------------------------------------------|----------|----|
| ANTINEUTROPHIL CYTOPLASMIC ANTIBODY POSITIVE | 10060136 | 17 |
| ELECTROCARDIOGRAM ST-T CHANGE                | 10061117 | 17 |
| PELVIC FRACTURE                              | 10061161 | 17 |
| KLEBSIELLA INFECTION                         | 10061259 | 17 |
| OOPHORECTOMY                                 | 10061889 | 17 |
| BLADDER SCAN                                 | 10061940 | 17 |
| TUMOUR MARKER TEST                           | 10062216 | 17 |
| CYSTITIS NONINFECTIVE                        | 10063057 | 17 |
| EOSINOPHILIC OESOPHAGITIS                    | 10064212 | 17 |
| PELVIC DISCOMFORT                            | 10064229 | 17 |
| GENE MUTATION                                | 10064571 | 17 |
| CAPILLARY NAIL REFILL TEST                   | 10065130 | 17 |
| VISCERAL PAIN                                | 10065385 | 17 |
| PRODUCT AFTER TASTE                          | 10086446 | 17 |
| ALLERGY TO ANIMAL                            | 10001742 | 16 |
| AMBLYOPIA                                    | 10001906 | 16 |
| ANGULAR CHEILITIS                            | 10002509 | 16 |
| AORTIC VALVE REPLACEMENT                     | 10002916 | 16 |
| ASPHYXIA                                     | 10003497 | 16 |
| ASTHMA EXERCISE INDUCED                      | 10003557 | 16 |
| AXILLARY VEIN THROMBOSIS                     | 10003880 | 16 |
| CSF CELL COUNT                               | 10011520 | 16 |
| CULTURE WOUND POSITIVE                       | 10011643 | 16 |
| CYSTOSCOPY NORMAL                            | 10011816 | 16 |
| FAECES PALE                                  | 10016102 | 16 |
| GAMMA-GLUTAMYLTRANSFERASE INCREASED          | 10017693 | 16 |
| HALO VISION                                  | 10019099 | 16 |
| HYDROCEPHALUS                                | 10020508 | 16 |
| HYPERREFLEXIA                                | 10020745 | 16 |
| HYPOVOLAEMIC SHOCK                           | 10021138 | 16 |
| LARGE INTESTINE PERFORATION                  | 10023804 | 16 |
| MEASLES                                      | 10027011 | 16 |
| MENINGIOMA                                   | 10027191 | 16 |
| METASTASES TO LYMPH NODES                    | 10027459 | 16 |
| MUSCLE RUPTURE                               | 10028331 | 16 |
| OESOPHAGEAL STENOSIS                         | 10030194 | 16 |
| OVARIAN CANCER                               | 10033128 | 16 |
| PO2                                          | 10035766 | 16 |
| RENAL TRANSPLANT                             | 10038533 | 16 |
| SPINAL CORD COMPRESSION                      | 10041549 | 16 |
| SUICIDE ATTEMPT                              | 10042464 | 16 |
| TETANY                                       | 10043380 | 16 |
| THYROXINE DECREASED                          | 10043816 | 16 |



|                                                    |          |    |
|----------------------------------------------------|----------|----|
| TUBERCULOSIS                                       | 10044755 | 16 |
| VENTRICULAR HYPERTROPHY                            | 10047295 | 16 |
| URTICARIAL VASCULITIS                              | 10048820 | 16 |
| VISUAL BRIGHTNESS                                  | 10049155 | 16 |
| RED BLOOD CELL SEDIMENTATION RATE ABNORMAL         | 10049186 | 16 |
| GINGIVAL PRURITUS                                  | 10049306 | 16 |
| LEFT VENTRICULAR DILATATION                        | 10050043 | 16 |
| LUMBAR RADICULOPATHY                               | 10050219 | 16 |
| LUPUS-LIKE SYNDROME                                | 10050551 | 16 |
| PULMONARY CALCIFICATION                            | 10051200 | 16 |
| INJECTION SITE MACULE                              | 10067255 | 16 |
| WITHDRAWAL OF LIFE SUPPORT                         | 10067595 | 16 |
| GENITAL SWELLING                                   | 10067639 | 16 |
| BRAIN STEM STROKE                                  | 10068644 | 16 |
| ENTEROCOCCUS TEST POSITIVE                         | 10070024 | 16 |
| ENTEROVIRUS TEST                                   | 10070396 | 16 |
| LOSS OF BLADDER SENSATION                          | 10070632 | 16 |
| INTENTIONAL MEDICAL DEVICE REMOVAL BY PATIENT      | 10070773 | 16 |
| BASAL GANGLIA STROKE                               | 10071043 | 16 |
| VIRAL SEPSIS                                       | 10071362 | 16 |
| N-TERMINAL PROHORMONE BRAIN NATRIURETIC PEPTIDE NO | 10071659 | 16 |
| BOTULINUM TOXIN INJECTION                          | 10073539 | 16 |
| VACCINATION SITE EXTRAVASATION                     | 10076163 | 16 |
| NEISSERIA TEST                                     | 10082453 | 16 |
| MAGNETIC RESONANCE IMAGING BREAST ABNORMAL         | 10083124 | 16 |
| FOREIGN BODY IN THROAT                             | 10083433 | 16 |
| SARS-COV-2 TEST FALSE POSITIVE                     | 10084602 | 16 |
| PALATAL DISORDER                                   | 10052453 | 16 |
| ENTERAL NUTRITION                                  | 10052591 | 16 |
| VENTRICULAR DRAINAGE                               | 10052947 | 16 |
| FLUID INTAKE RESTRICTION                           | 10053623 | 16 |
| SHIFT TO THE LEFT                                  | 10056383 | 16 |
| PERIORBITAL CELLULITIS                             | 10057182 | 16 |
| HAEMATOLOGY TEST NORMAL                            | 10057756 | 16 |
| ADMINISTRATION SITE PAIN                           | 10058049 | 16 |
| OXYGEN CONSUMPTION DECREASED                       | 10059165 | 16 |
| CYTOLOGY NORMAL                                    | 10059531 | 16 |
| BASE EXCESS                                        | 10059961 | 16 |
| PLATELET FACTOR 4                                  | 10060192 | 16 |
| ANTI-THYROID ANTIBODY NEGATIVE                     | 10060311 | 16 |
| COMPUTERISED TOMOGRAM CORONARY ARTERY NORMAL       | 10060805 | 16 |
| ABDOMINAL HERNIA                                   | 10060954 | 16 |
| DIAPHRAGMATIC DISORDER                             | 10061106 | 16 |

|                                                |          |    |
|------------------------------------------------|----------|----|
| ENTEROCOCCAL INFECTION                         | 10061124 | 16 |
| PSYCHIATRIC SYMPTOM                            | 10061472 | 16 |
| DEFORMITY                                      | 10061619 | 16 |
| CHONDROPATHY                                   | 10061762 | 16 |
| PANCREATIC ENZYMES INCREASED                   | 10061900 | 16 |
| BREATH SOUNDS ABSENT                           | 10062285 | 16 |
| THYROID HORMONES INCREASED                     | 10063161 | 16 |
| DEVICE RELATED INFECTION                       | 10064687 | 16 |
| NIH STROKE SCALE                               | 10065527 | 16 |
| SARS-COV-2 RNA INCREASED                       | 10085495 | 16 |
| POLYMERS ALLERGY                               | 10086347 | 16 |
| ADENOCARCINOMA                                 | 10001141 | 15 |
| ARTERIAL CATHETERISATION                       | 10003148 | 15 |
| BASAL CELL CARCINOMA                           | 10004146 | 15 |
| BLOOD OSMOLARITY                               | 10005693 | 15 |
| BLOOD PARATHYROID HORMONE                      | 10005699 | 15 |
| BLOOD PRESSURE IMMEASURABLE                    | 10005748 | 15 |
| BLOOD PRESSURE SYSTOLIC DECREASED              | 10005758 | 15 |
| BRONCHIOLITIS                                  | 10006448 | 15 |
| CARDIAC FAILURE CHRONIC                        | 10007558 | 15 |
| CARDIOSPASM                                    | 10007645 | 15 |
| CEREBROSPINAL FLUID LEAKAGE                    | 10008164 | 15 |
| COLOSTOMY                                      | 10010041 | 15 |
| CORONARY ARTERY STENOSIS                       | 10011089 | 15 |
| CSF OLIGOCLONAL BAND PRESENT                   | 10011562 | 15 |
| ENDOSCOPIC RETROGRADE CHOLANGIOPANCREATOGRAPHY | 10014802 | 15 |
| FLAT AFFECT                                    | 10016759 | 15 |
| GASTRIC HAEMORRHAGE                            | 10017788 | 15 |
| GINGIVAL DISCOLOURATION                        | 10018278 | 15 |
| GLOMERULONEPHRITIS                             | 10018364 | 15 |
| GRAM STAIN NEGATIVE                            | 10018655 | 15 |
| HAEMANGIOMA OF SKIN                            | 10018823 | 15 |
| IIIRD NERVE PARALYSIS                          | 10021283 | 15 |
| IMPETIGO                                       | 10021531 | 15 |
| INJECTION SITE NERVE DAMAGE                    | 10022083 | 15 |
| IVTH NERVE PARALYSIS                           | 10023110 | 15 |
| KERATITIS                                      | 10023332 | 15 |
| KYPHOSIS                                       | 10023509 | 15 |
| LACTOSE INTOLERANCE                            | 10023681 | 15 |
| MALIGNANT MELANOMA                             | 10025650 | 15 |
| METASTASES TO LIVER                            | 10027457 | 15 |
| MORPHOEA                                       | 10027982 | 15 |
| MYOPATHY                                       | 10028641 | 15 |

|                                                      |          |    |
|------------------------------------------------------|----------|----|
| OVARIAN ENLARGEMENT                                  | 10033157 | 15 |
| PERIORAL DERMATITIS                                  | 10034541 | 15 |
| PERITONITIS                                          | 10034674 | 15 |
| PHARYNGEAL HAEMORRHAGE                               | 10034827 | 15 |
| PHLEBITIS SUPERFICIAL                                | 10034902 | 15 |
| POSTOPERATIVE WOUND INFECTION                        | 10036410 | 15 |
| PREGNANCY TEST URINE POSITIVE                        | 10036578 | 15 |
| PULMONARY GRANULOMA                                  | 10037391 | 15 |
| RADIAL NERVE PALSY                                   | 10037751 | 15 |
| SKULL X-RAY                                          | 10040964 | 15 |
| TEETHING                                             | 10043183 | 15 |
| THROMBOTIC STROKE                                    | 10043647 | 15 |
| VASCULITIC RASH                                      | 10047111 | 15 |
| RED BLOOD CELLS URINE NEGATIVE                       | 10048546 | 15 |
| SCAR PAIN                                            | 10049002 | 15 |
| ANAPHYLAXIS PROPHYLAXIS                              | 10049090 | 15 |
| CARBOHYDRATE ANTIGEN 125                             | 10049248 | 15 |
| PHARYNGEAL MASS                                      | 10049270 | 15 |
| ONYCHOMADESIS                                        | 10049274 | 15 |
| SUDDEN ONSET OF SLEEP                                | 10050014 | 15 |
| ANTI-NEUTROPHIL CYTOPLASMIC ANTIBODY POSITIVE VASCUL | 10050894 | 15 |
| COMPLEMENT FACTOR C4 DECREASED                       | 10050983 | 15 |
| PREMENSTRUAL DYSPHORIC DISORDER                      | 10051537 | 15 |
| VASOGENIC CEREBRAL OEDEMA                            | 10067275 | 15 |
| REFLEX TEST NORMAL                                   | 10068272 | 15 |
| COMA SCALE                                           | 10069708 | 15 |
| BORRELIA TEST POSITIVE                               | 10070011 | 15 |
| WALKING DISTANCE TEST                                | 10071033 | 15 |
| INJECTION RELATED REACTION                           | 10071152 | 15 |
| SYSTOLIC DYSFUNCTION                                 | 10071436 | 15 |
| TIME PERCEPTION ALTERED                              | 10074073 | 15 |
| TENDON DISCOMFORT                                    | 10074599 | 15 |
| ADMINISTRATION SITE BRUISE                           | 10075094 | 15 |
| WEST NILE VIRUS TEST                                 | 10075808 | 15 |
| SINUS NODE DYSFUNCTION                               | 10075889 | 15 |
| PRODUCT LEAKAGE                                      | 10076232 | 15 |
| FEEDING TUBE USER                                    | 10076368 | 15 |
| ADAMTS13 ACTIVITY ASSAY                              | 10076768 | 15 |
| CYTOKINE TEST                                        | 10077352 | 15 |
| BILIRUBIN URINE PRESENT                              | 10077356 | 15 |
| NOTHING BY MOUTH ORDER                               | 10080668 | 15 |
| CHILDHOOD ASTHMA                                     | 10081274 | 15 |
| INTRAUTERINE CONTRACEPTION                           | 10082352 | 15 |

|                                     |          |    |
|-------------------------------------|----------|----|
| MAGNETIC RESONANCE IMAGING BREAST   | 10083122 | 15 |
| ORBITAL SWELLING                    | 10085251 | 15 |
| STATUS MIGRAINOSUS                  | 10052945 | 15 |
| OESOPHAGEAL DISCOMFORT              | 10053634 | 15 |
| FACET JOINT SYNDROME                | 10054813 | 15 |
| MUCOSAL DISCOLOURATION              | 10054877 | 15 |
| PHONOPHOBIA                         | 10054956 | 15 |
| TOXOPLASMA SEROLOGY NEGATIVE        | 10056299 | 15 |
| ABDOMINAL INFECTION                 | 10056519 | 15 |
| DAYDREAMING                         | 10057315 | 15 |
| HIV ANTIBODY                        | 10058761 | 15 |
| HIV ANTIGEN                         | 10058763 | 15 |
| MYOGLOBIN BLOOD                     | 10059884 | 15 |
| HAEMORRHAGIC OVARIAN CYST           | 10060781 | 15 |
| BLOOD ELECTROLYTES ABNORMAL         | 10061014 | 15 |
| BREAST DISORDER                     | 10061021 | 15 |
| CSF WHITE BLOOD CELL COUNT NEGATIVE | 10061099 | 15 |
| HEART INJURY                        | 10061200 | 15 |
| TUMOUR EXCISION                     | 10061392 | 15 |
| BLOOD ELECTROLYTES DECREASED        | 10061715 | 15 |
| HISTOLOGY                           | 10062005 | 15 |
| THYROID GLAND SCAN ABNORMAL         | 10062149 | 15 |
| ACARODERMATITIS                     | 10063409 | 15 |
| SPONDYLOLISTHESIS                   | 10063550 | 15 |
| BLOOD COUNT NORMAL                  | 10064197 | 15 |
| ULCERATIVE KERATITIS                | 10064996 | 15 |
| PHARYNGEAL INFLAMMATION             | 10065716 | 15 |
| AORTIC DISSECTION                   | 10002895 | 14 |
| BILE DUCT STONE                     | 10004637 | 14 |
| BIOPSY BRAIN                        | 10004741 | 14 |
| BLOOD OESTROGEN INCREASED           | 10005688 | 14 |
| BLOOD OSMOLARITY INCREASED          | 10005697 | 14 |
| BLOOD ZINC                          | 10005864 | 14 |
| BREAST DISCOLOURATION               | 10006228 | 14 |
| BREAST OEDEMA                       | 10006294 | 14 |
| CEREBRAL ARTERY EMBOLISM            | 10008088 | 14 |
| CEREBRAL PALSY                      | 10008129 | 14 |
| CHOLANGITIS                         | 10008604 | 14 |
| CHONDROCALCINOSIS PYROPHOSPHATE     | 10008690 | 14 |
| CONTRAINDICATION TO VACCINATION     | 10010835 | 14 |
| CSF OLIGOCLONAL BAND                | 10011558 | 14 |
| ELECTROCARDIOGRAM PR SHORTENED      | 10014374 | 14 |
| EMBOLISM ARTERIAL                   | 10014513 | 14 |

|                                       |          |    |
|---------------------------------------|----------|----|
| HAPTOGLOBIN DECREASED                 | 10019150 | 14 |
| HIV TEST FALSE POSITIVE               | 10020186 | 14 |
| HODGKIN'S DISEASE                     | 10020206 | 14 |
| IMPULSIVE BEHAVIOUR                   | 10021567 | 14 |
| LACK OF SPONTANEOUS SPEECH            | 10023615 | 14 |
| LOSS OF EMPLOYMENT                    | 10024861 | 14 |
| MOUTH BREATHING                       | 10028017 | 14 |
| NEPHROPATHY                           | 10029151 | 14 |
| OVERWEIGHT                            | 10033307 | 14 |
| POLYHYDRAMNIOS                        | 10036079 | 14 |
| SALIVA ALTERED                        | 10039379 | 14 |
| SLEEP TALKING                         | 10041009 | 14 |
| SQUAMOUS CELL CARCINOMA               | 10041823 | 14 |
| TENOSYNOVITIS                         | 10043261 | 14 |
| TWIN PREGNANCY                        | 10045188 | 14 |
| VISUAL FIELD TESTS ABNORMAL           | 10047567 | 14 |
| POSTPARTUM STATE                      | 10048738 | 14 |
| LUMBAR VERTEBRAL FRACTURE             | 10049947 | 14 |
| WOUND DRAINAGE                        | 10050325 | 14 |
| CORONARY ANGIOPLASTY                  | 10050329 | 14 |
| HEPATITIS B SURFACE ANTIGEN NEGATIVE  | 10050542 | 14 |
| WHITE BLOOD CELLS URINE               | 10050663 | 14 |
| SUPRAPUBIC PAIN                       | 10050822 | 14 |
| POST PROCEDURAL HAEMORRHAGE           | 10051077 | 14 |
| CONJUNCTIVAL HYPERAEMIA               | 10051625 | 14 |
| STICKY SKIN                           | 10051788 | 14 |
| TREATMENT FAILURE                     | 10066901 | 14 |
| BASAL GANGLIA HAEMORRHAGE             | 10067057 | 14 |
| ORGANISING PNEUMONIA                  | 10067472 | 14 |
| WEST NILE VIRUS TEST NEGATIVE         | 10068813 | 14 |
| GASTROINTESTINAL EXAMINATION          | 10068978 | 14 |
| GENE SEQUENCING                       | 10069604 | 14 |
| TOXICITY TO VARIOUS AGENTS            | 10070863 | 14 |
| WALKING DISTANCE TEST ABNORMAL        | 10071032 | 14 |
| EYELID SKIN DRYNESS                   | 10071717 | 14 |
| COMPUTERISED TOMOGRAM KIDNEY ABNORMAL | 10072171 | 14 |
| ENCEPHALITIS AUTOIMMUNE               | 10072378 | 14 |
| INCENTIVE SPIROMETRY                  | 10072425 | 14 |
| SENSITIVITY TO WEATHER CHANGE         | 10072850 | 14 |
| BARTONELLA TEST NEGATIVE              | 10075208 | 14 |
| COATING IN MOUTH                      | 10075366 | 14 |
| GASTROINTESTINAL BACTERIAL OVERGROWTH | 10078158 | 14 |
| DEFAECATION DISORDER                  | 10079938 | 14 |

|                                       |          |    |
|---------------------------------------|----------|----|
| AST/ALT RATIO                         | 10079980 | 14 |
| LICHEN PLANOPILARIS                   | 10081142 | 14 |
| NASAL MUCOSAL BLISTERING              | 10082185 | 14 |
| CYST REMOVAL                          | 10052938 | 14 |
| PATIENT RESTRAINT                     | 10053316 | 14 |
| HEAT THERAPY                          | 10053324 | 14 |
| VASCULAR RUPTURE                      | 10053649 | 14 |
| CEREBRAL HAEMATOMA                    | 10053942 | 14 |
| TRANSAMINASES                         | 10054888 | 14 |
| IN VITRO FERTILISATION                | 10056204 | 14 |
| POST CONCUSSION SYNDROME              | 10057230 | 14 |
| MULTI-ORGAN DISORDER                  | 10058092 | 14 |
| ALLERGY TO ARTHROPOD STING            | 10058284 | 14 |
| AORTIC DISORDER                       | 10058648 | 14 |
| LIGHT CHAIN ANALYSIS                  | 10060083 | 14 |
| ANALGESIC DRUG LEVEL                  | 10060090 | 14 |
| PARASITE STOOL TEST                   | 10060812 | 14 |
| APPENDIX DISORDER                     | 10060960 | 14 |
| PSEUDOMONAS INFECTION                 | 10061471 | 14 |
| ARTERY DISSECTION                     | 10061660 | 14 |
| BREAST OPERATION                      | 10061734 | 14 |
| CYTOLOGY                              | 10061804 | 14 |
| DISEASE PROGRESSION                   | 10061818 | 14 |
| WHOLE BODY SCAN                       | 10062151 | 14 |
| SHOULDER OPERATION                    | 10062242 | 14 |
| CHOLECYSTITIS INFECTIVE               | 10062631 | 14 |
| LIGAMENT RUPTURE                      | 10065433 | 14 |
| MULTISYSTEM INFLAMMATORY SYNDROME     | 10086091 | 14 |
| THYROID HORMONES TEST                 | 10086270 | 14 |
| ACUTE FEBRILE NEUTROPHILIC DERMATOSIS | 10000748 | 13 |
| AMMONIA INCREASED                     | 10001946 | 13 |
| BIOPSY LUNG ABNORMAL                  | 10004795 | 13 |
| BRAIN STEM HAEMORRHAGE                | 10006145 | 13 |
| BREAST CELLULITIS                     | 10006217 | 13 |
| CAPILLARY DISORDER                    | 10007189 | 13 |
| CHROMATOPSIA                          | 10008795 | 13 |
| CHROMOSOME ANALYSIS NORMAL            | 10008818 | 13 |
| CLONUS                                | 10009346 | 13 |
| CORTISOL INCREASED                    | 10011207 | 13 |
| CSF GLUCOSE                           | 10011535 | 13 |
| DYSLEXIA                              | 10013932 | 13 |
| EHLERS-DANLOS SYNDROME                | 10014316 | 13 |
| ENDOMETRIAL DISORDER                  | 10014753 | 13 |

|                                     |          |    |
|-------------------------------------|----------|----|
| EPHELIDES                           | 10014970 | 13 |
| GLOMERULONEPHRITIS MINIMAL LESION   | 10018374 | 13 |
| HAIR GROWTH ABNORMAL                | 10019044 | 13 |
| HAND-FOOT-AND-MOUTH DISEASE         | 10019113 | 13 |
| HEPATITIS ACUTE                     | 10019727 | 13 |
| HEPATITIS C                         | 10019744 | 13 |
| HIGH DENSITY LIPOPROTEIN INCREASED  | 10020061 | 13 |
| HYPERTHERMIA                        | 10020843 | 13 |
| HYPERTONIA                          | 10020852 | 13 |
| ILEOSTOMY                           | 10021321 | 13 |
| IMMUNOGLOBULINS NORMAL              | 10021501 | 13 |
| LABILE BLOOD PRESSURE               | 10023533 | 13 |
| LIPIDS INCREASED                    | 10024592 | 13 |
| LYMPHANGITIS                        | 10025226 | 13 |
| MACROCYTOSIS                        | 10025382 | 13 |
| MALABSORPTION                       | 10025476 | 13 |
| NEOPLASM SKIN                       | 10029098 | 13 |
| OLIGURIA                            | 10030302 | 13 |
| OVARIAN DISORDER                    | 10033139 | 13 |
| PARKINSONISM                        | 10034010 | 13 |
| PERTUSSIS                           | 10034738 | 13 |
| POSITRON EMISSION TOMOGRAPHY NORMAL | 10036222 | 13 |
| RADIUS FRACTURE                     | 10037802 | 13 |
| RENAL STONE REMOVAL                 | 10038528 | 13 |
| SCINTILLATING SCOTOMA               | 10039677 | 13 |
| SEBORRHOEIC DERMATITIS              | 10039793 | 13 |
| SMALL INTESTINAL RESECTION          | 10041105 | 13 |
| SPINAL LAMINECTOMY                  | 10041576 | 13 |
| THYROID CYST                        | 10043706 | 13 |
| TONGUE GEOGRAPHIC                   | 10043957 | 13 |
| TOURETTE'S DISORDER                 | 10044126 | 13 |
| UPPER MOTOR NEURONE LESION          | 10046298 | 13 |
| URETHRAL PAIN                       | 10046461 | 13 |
| THORACIC OUTLET SYNDROME            | 10048627 | 13 |
| VERTEBRAL LESION                    | 10048877 | 13 |
| ALLERGIC SINUSITIS                  | 10049153 | 13 |
| INJECTION SITE JOINT SWELLING       | 10049260 | 13 |
| BRONCHOALVEOLAR LAVAGE              | 10049413 | 13 |
| TONGUE HAEMORRHAGE                  | 10049870 | 13 |
| SELF-INJURIOUS IDEATION             | 10051154 | 13 |
| CENTRAL NERVOUS SYSTEM INFLAMMATION | 10051288 | 13 |
| WHITE COAT HYPERTENSION             | 10051581 | 13 |
| ACUTE CORONARY SYNDROME             | 10051592 | 13 |

|                                              |          |    |
|----------------------------------------------|----------|----|
| NUMB CHIN SYNDROME                           | 10066930 | 13 |
| INTRANASAL HYPOAESTHESIA                     | 10067068 | 13 |
| POST PROCEDURAL INFECTION                    | 10067268 | 13 |
| NEUROLOGICAL DECOMPENSATION                  | 10068357 | 13 |
| TRAUMATIC LUNG INJURY                        | 10069363 | 13 |
| ENTEROVIRUS TEST POSITIVE                    | 10070386 | 13 |
| EPIDURAL INJECTION                           | 10072041 | 13 |
| GRANULOMATOSIS WITH POLYANGIITIS             | 10072579 | 13 |
| RENAL REPLACEMENT THERAPY                    | 10074746 | 13 |
| GENITAL BLISTER                              | 10074995 | 13 |
| CSF RED BLOOD CELL COUNT                     | 10075561 | 13 |
| VACCINATION SITE STREAKING                   | 10076189 | 13 |
| CEREBRAL ENDOVASCULAR ANEURYSM REPAIR        | 10077079 | 13 |
| PREMATURE MENARCHE                           | 10077320 | 13 |
| FUNDUS AUTOFLUORESCENCE                      | 10078792 | 13 |
| WALL MOTION SCORE INDEX ABNORMAL             | 10079016 | 13 |
| PANCREATIC FAILURE                           | 10079281 | 13 |
| HERPES ZOSTER REACTIVATION                   | 10080516 | 13 |
| SINONASAL OBSTRUCTION                        | 10080545 | 13 |
| ACUTE CARDIAC EVENT                          | 10081099 | 13 |
| INCORRECT PRODUCT ADMINISTRATION DURATION    | 10081581 | 13 |
| GINGIVAL ABSCESS                             | 10052359 | 13 |
| HIGH RISK PREGNANCY                          | 10052744 | 13 |
| ALCOHOL WITHDRAWAL SYNDROME                  | 10053164 | 13 |
| HEARING DISABILITY                           | 10053194 | 13 |
| INAPPROPRIATE ANTIDIURETIC HORMONE SECRETION | 10053198 | 13 |
| FOETAL MONITORING                            | 10053278 | 13 |
| BLOOD PRESSURE ORTHOSTATIC                   | 10053352 | 13 |
| CARDIAC VENTRICULAR THROMBOSIS               | 10053994 | 13 |
| GENITAL BURNING SENSATION                    | 10054815 | 13 |
| ELECTROLYTE SUBSTITUTION THERAPY             | 10054977 | 13 |
| LOSS OF PROPRIOCEPTION                       | 10057332 | 13 |
| RIGHT ATRIAL ENLARGEMENT                     | 10058227 | 13 |
| CARDIAC FUNCTION TEST ABNORMAL               | 10058479 | 13 |
| URINE KETONE BODY                            | 10059222 | 13 |
| RIGHT VENTRICULAR SYSTOLIC PRESSURE          | 10060199 | 13 |
| NEOPLASM PROGRESSION                         | 10061309 | 13 |
| POISONING                                    | 10061355 | 13 |
| UTERINE CONTRACTIONS ABNORMAL                | 10061400 | 13 |
| PULMONARY VASCULAR DISORDER                  | 10061474 | 13 |
| ABNORMAL SLEEP-RELATED EVENT                 | 10061613 | 13 |
| CYST RUPTURE                                 | 10061803 | 13 |
| DRUG INTOLERANCE                             | 10061822 | 13 |



|                                                   |          |    |
|---------------------------------------------------|----------|----|
| OBSTRUCTION                                       | 10061876 | 13 |
| PHYSICAL EXAMINATION ABNORMAL                     | 10062078 | 13 |
| URINARY TRACT PAIN                                | 10062225 | 13 |
| SLEEP DISORDER DUE TO A GENERAL MEDICAL CONDITION | 10063910 | 13 |
| ONYCHALGIA                                        | 10064251 | 13 |
| KERATOSIS PILARIS                                 | 10066295 | 13 |
| COVID-19 SCREENING                                | 10085530 | 13 |
| AKINESIA                                          | 10001541 | 12 |
| ALBUMIN URINE                                     | 10001575 | 12 |
| ALCOHOL INTOLERANCE                               | 10001598 | 12 |
| ALOPECIA UNIVERSALIS                              | 10001767 | 12 |
| ANGIOGRAM RETINA                                  | 10002443 | 12 |
| ANORECTAL DISORDER                                | 10002644 | 12 |
| ANURIA                                            | 10002847 | 12 |
| BILIRUBIN CONJUGATED NORMAL                       | 10004686 | 12 |
| BIOPSY BREAST NORMAL                              | 10004746 | 12 |
| BLEEDING TIME PROLONGED                           | 10005140 | 12 |
| BLOOD IMMUNOGLOBULIN M NORMAL                     | 10005602 | 12 |
| BLOOD PARATHYROID HORMONE INCREASED               | 10005703 | 12 |
| BREAST ABSCESS                                    | 10006171 | 12 |
| BUNDLE BRANCH BLOCK                               | 10006578 | 12 |
| CEREBRAL ARTERY THROMBOSIS                        | 10008092 | 12 |
| CHANGE IN SUSTAINED ATTENTION                     | 10008398 | 12 |
| CHEST CRUSHING                                    | 10008468 | 12 |
| CHRONIC GASTRITIS                                 | 10008882 | 12 |
| COMPRESSION FRACTURE                              | 10010214 | 12 |
| CORNEAL ABRASION                                  | 10010984 | 12 |
| CSF LYMPHOCYTE COUNT INCREASED                    | 10011549 | 12 |
| DIABETIC NEUROPATHY                               | 10012680 | 12 |
| DUODENITIS                                        | 10013864 | 12 |
| ENDOMETRIAL CANCER                                | 10014733 | 12 |
| ENTEROCOLITIS                                     | 10014893 | 12 |
| EYE ALLERGY                                       | 10015907 | 12 |
| EYELID INFECTION                                  | 10015988 | 12 |
| FIBROCYSTIC BREAST DISEASE                        | 10016621 | 12 |
| FIBULA FRACTURE                                   | 10016667 | 12 |
| GLUCOSE URINE                                     | 10018436 | 12 |
| GLYCOSYLATED HAEMOGLOBIN DECREASED                | 10018482 | 12 |
| HAEMOPERITONEUM                                   | 10018935 | 12 |
| HYPERBILIRUBINAEMIA                               | 10020578 | 12 |
| HYPERPHAGIA                                       | 10020710 | 12 |
| HYPERTENSIVE HEART DISEASE                        | 10020823 | 12 |
| INFERTILITY                                       | 10021926 | 12 |

|                                               |          |    |
|-----------------------------------------------|----------|----|
| INJECTION SITE CYST                           | 10022055 | 12 |
| LUPUS NEPHRITIS                               | 10025140 | 12 |
| MEAN CELL HAEMOGLOBIN CONCENTRATION INCREASED | 10026992 | 12 |
| MENORRHAGIA                                   | 10027313 | 12 |
| MILK ALLERGY                                  | 10027633 | 12 |
| MYOCARDIAL FIBROSIS                           | 10028594 | 12 |
| NIGHT BLINDNESS                               | 10029404 | 12 |
| OBSTRUCTIVE SLEEP APNOEA SYNDROME             | 10029983 | 12 |
| OPTIC NERVE INJURY                            | 10030938 | 12 |
| PANCREATIC CARCINOMA                          | 10033609 | 12 |
| PANNICULITIS                                  | 10033675 | 12 |
| PH URINE                                      | 10034791 | 12 |
| PITYRIASIS                                    | 10035110 | 12 |
| PNEUMONIA KLEBSIELLA                          | 10035717 | 12 |
| PNEUMONIA STAPHYLOCOCCAL                      | 10035734 | 12 |
| PNEUMONIA STREPTOCOCCAL                       | 10035735 | 12 |
| SEBORRHOEA                                    | 10039792 | 12 |
| SIGMOIDOSCOPY                                 | 10040669 | 12 |
| SMOOTH MUSCLE ANTIBODY                        | 10041227 | 12 |
| TONGUE SPASM                                  | 10043981 | 12 |
| TONIC CONVULSION                              | 10043994 | 12 |
| VAGINAL ODOUR                                 | 10046935 | 12 |
| VOLVULUS                                      | 10047697 | 12 |
| TERMINAL STATE                                | 10048669 | 12 |
| UROSEPSIS                                     | 10048709 | 12 |
| VERTEBRAL ARTERY OCCLUSION                    | 10048965 | 12 |
| INTRA-UTERINE CONTRACEPTIVE DEVICE REMOVAL    | 10049481 | 12 |
| SHOULDER ARTHROPLASTY                         | 10049551 | 12 |
| SPUTUM PURULENT                               | 10050090 | 12 |
| BLOOD PHOSPHORUS INCREASED                    | 10050196 | 12 |
| DENTAL EXAMINATION                            | 10050316 | 12 |
| CAROTID ARTERY DISSECTION                     | 10050403 | 12 |
| LYMPH GLAND INFECTION                         | 10050823 | 12 |
| PROTEIN S NORMAL                              | 10051737 | 12 |
| BONE MARROW OEDEMA                            | 10051763 | 12 |
| THYROID CANCER                                | 10066474 | 12 |
| ULTRASOUND OVARY ABNORMAL                     | 10067168 | 12 |
| RIGHT ATRIAL DILATATION                       | 10067282 | 12 |
| ABDOMINAL WALL HAEMATOMA                      | 10067383 | 12 |
| ANAL PRURITUS                                 | 10068172 | 12 |
| TERMINAL INSOMNIA                             | 10068932 | 12 |
| INFERIOR VENA CAVA DILATATION                 | 10069111 | 12 |
| PRODUCT COLOUR ISSUE                          | 10069221 | 12 |

|                                                   |          |    |
|---------------------------------------------------|----------|----|
| PSEUDOMONAS TEST POSITIVE                         | 10070135 | 12 |
| STRESS ECHOCARDIOGRAM ABNORMAL                    | 10070746 | 12 |
| GASTROINTESTINAL TRACT IRRITATION                 | 10070840 | 12 |
| POSTERIOR REVERSIBLE ENCEPHALOPATHY SYNDROME      | 10071066 | 12 |
| HUMAN CHORIONIC GONADOTROPIN INCREASED            | 10071332 | 12 |
| MULTIPLE USE OF SINGLE-USE PRODUCT                | 10072342 | 12 |
| RHEUMATIC DISORDER                                | 10072736 | 12 |
| FEMALE SEX HORMONE LEVEL                          | 10072841 | 12 |
| TRIPLE NEGATIVE BREAST CANCER                     | 10075566 | 12 |
| VACCINATION SITE JOINT ERYTHEMA                   | 10076177 | 12 |
| HELPLESSNESS                                      | 10077169 | 12 |
| PROCALCITONIN DECREASED                           | 10077830 | 12 |
| HLA-B*27 POSITIVE                                 | 10078451 | 12 |
| CERVICAL DILATATION                               | 10079273 | 12 |
| X-RAY DENTAL ABNORMAL                             | 10079993 | 12 |
| PRODUCT DISPENSING ERROR                          | 10080359 | 12 |
| TISSUE INJURY                                     | 10080903 | 12 |
| LARGE INTESTINE INFECTION                         | 10081959 | 12 |
| ANAESTHESIA ORAL                                  | 10082548 | 12 |
| PELVIC FLOOR DYSFUNCTION                          | 10083246 | 12 |
| URINARY OCCULT BLOOD NEGATIVE                     | 10084961 | 12 |
| OCULAR VASCULAR DISORDER                          | 10052896 | 12 |
| FOETAL NON-STRESS TEST                            | 10053108 | 12 |
| THORACIC CAVITY DRAINAGE                          | 10053975 | 12 |
| DEPRESSIVE SYMPTOM                                | 10054089 | 12 |
| THROAT LESION                                     | 10054830 | 12 |
| TENOSYNOVITIS STENOSANS                           | 10056698 | 12 |
| DENTAL CARE                                       | 10056723 | 12 |
| RECTAL TENESMUS                                   | 10057071 | 12 |
| DYSLIPIDAEMIA                                     | 10058108 | 12 |
| OCULAR ICTERUS                                    | 10058117 | 12 |
| BIOPSY ARTERY NORMAL                              | 10058393 | 12 |
| NEGATIVE THOUGHTS                                 | 10058672 | 12 |
| DERMATITIS PSORIASIFORM                           | 10058675 | 12 |
| SKIN OEDEMA                                       | 10058679 | 12 |
| NIPPLE SWELLING                                   | 10058680 | 12 |
| EARLY SATIETY                                     | 10059186 | 12 |
| IMMUNOHISTOCHEMISTRY                              | 10059656 | 12 |
| CYTOGENETIC ANALYSIS NORMAL                       | 10059886 | 12 |
| POSITIVE END-EXPIRATORY PRESSURE                  | 10059890 | 12 |
| LEFT VENTRICULAR END-DIASTOLIC PRESSURE INCREASED | 10060088 | 12 |
| CALCIUM IONISED NORMAL                            | 10060897 | 12 |
| COMPLEMENT FACTOR NORMAL                          | 10061056 | 12 |

|                                        |          |    |
|----------------------------------------|----------|----|
| SKULL FRACTURE                         | 10061365 | 12 |
| SOFT TISSUE DISORDER                   | 10061366 | 12 |
| BONE LESION                            | 10061728 | 12 |
| BONE MARROW DISORDER                   | 10061729 | 12 |
| CARDIAC ELECTROPHYSIOLOGIC STUDY       | 10061739 | 12 |
| EATING DISORDER SYMPTOM                | 10061832 | 12 |
| PURULENCE                              | 10061926 | 12 |
| VASCULAR TEST                          | 10062172 | 12 |
| CHEST WALL MASS                        | 10063004 | 12 |
| AMINO ACID LEVEL                       | 10063258 | 12 |
| CARBON DIOXIDE ABNORMAL                | 10064156 | 12 |
| EPIPLOIC APPENDAGITIS                  | 10064231 | 12 |
| CEREBRAL CALCIFICATION                 | 10066296 | 12 |
| ANISOCYTOSIS                           | 10002536 | 11 |
| BARTHOLIN'S CYST                       | 10004140 | 11 |
| BIOPSY CERVIX                          | 10004753 | 11 |
| BIOPSY ENDOMETRIUM ABNORMAL            | 10004770 | 11 |
| BLOOD CATECHOLAMINES                   | 10005411 | 11 |
| BLOOD CHOLESTEROL DECREASED            | 10005424 | 11 |
| BLOOD CREATINE PHOSPHOKINASE MB NORMAL | 10005475 | 11 |
| BLOOD FOLATE INCREASED                 | 10005528 | 11 |
| BLOOD TESTOSTERONE INCREASED           | 10005815 | 11 |
| BODY TINEA                             | 10005913 | 11 |
| CARDIAC ANEURYSM                       | 10007513 | 11 |
| CATAPLEXY                              | 10007737 | 11 |
| CAUTERY TO NOSE                        | 10007829 | 11 |
| CHEMICAL BURN                          | 10008420 | 11 |
| COOMBS DIRECT TEST                     | 10010929 | 11 |
| COR PULMONALE                          | 10010968 | 11 |
| CORNEAL OEDEMA                         | 10011033 | 11 |
| CORTISOL DECREASED                     | 10011198 | 11 |
| CRYSTAL URINE PRESENT                  | 10011512 | 11 |
| ELECTRIC SHOCK                         | 10014357 | 11 |
| ELECTROCARDIOGRAM QRS COMPLEX ABNORMAL | 10014378 | 11 |
| ELECTROPHORESIS                        | 10014458 | 11 |
| EUSTACHIAN TUBE OBSTRUCTION            | 10015544 | 11 |
| FEAR OF DISEASE                        | 10016278 | 11 |
| FIBROADENOMA OF BREAST                 | 10016613 | 11 |
| FRACTURED SACRUM                       | 10017308 | 11 |
| FULL BLOOD COUNT DECREASED             | 10017413 | 11 |
| GLOMERULONEPHRITIS RAPIDLY PROGRESSIVE | 10018378 | 11 |
| HAEMANGIOMA OF LIVER                   | 10018821 | 11 |
| HAIR COLOUR CHANGES                    | 10019030 | 11 |

|                                              |          |    |
|----------------------------------------------|----------|----|
| HALLUCINATION, OLFACTORY                     | 10019072 | 11 |
| HEPATITIS A ANTIBODY                         | 10019721 | 11 |
| HYPERTROPHY OF TONGUE PAPILLAE               | 10020893 | 11 |
| HYPOPHOSPHATAEMIA                            | 10021058 | 11 |
| INJECTION SITE ULCER                         | 10022105 | 11 |
| INSPIRATORY CAPACITY DECREASED               | 10022448 | 11 |
| INSULIN RESISTANCE                           | 10022489 | 11 |
| INTERMITTENT CLAUDICATION                    | 10022562 | 11 |
| LAPAROSCOPY                                  | 10023693 | 11 |
| LYMPHOCYTOSIS                                | 10025280 | 11 |
| MACULAR OEDEMA                               | 10025415 | 11 |
| MEDIASTINAL MASS                             | 10027076 | 11 |
| METASTASES TO BONE                           | 10027452 | 11 |
| METRRORRHAGIA                                | 10027514 | 11 |
| MICTURITION DISORDER                         | 10027561 | 11 |
| NEUROMYOPATHY                                | 10029323 | 11 |
| NON-HODGKIN'S LYMPHOMA                       | 10029547 | 11 |
| PELVIC ABSCESS                               | 10034236 | 11 |
| PEPTIC ULCER                                 | 10034341 | 11 |
| PERFUME SENSITIVITY                          | 10034434 | 11 |
| PLACENTA PRAEVIA                             | 10035119 | 11 |
| PLATELET COUNT ABNORMAL                      | 10035526 | 11 |
| PROCTITIS                                    | 10036774 | 11 |
| PULMONARY ARTERY THROMBOSIS                  | 10037340 | 11 |
| REBOUND EFFECT                               | 10038001 | 11 |
| RED BLOOD CELL COUNT ABNORMAL                | 10038151 | 11 |
| SERUM SICKNESS-LIKE REACTION                 | 10040402 | 11 |
| SKIN NECROSIS                                | 10040893 | 11 |
| SKIN STRIAE                                  | 10040925 | 11 |
| STUPOR                                       | 10042264 | 11 |
| SUBCUTANEOUS EMPHYSEMA                       | 10042344 | 11 |
| TONGUE PARALYSIS                             | 10043972 | 11 |
| TONGUE ROUGH                                 | 10043977 | 11 |
| TYPE I HYPERSENSITIVITY                      | 10045240 | 11 |
| UMBILICAL HERNIA                             | 10045458 | 11 |
| URINE FLOW DECREASED                         | 10046640 | 11 |
| WATER POLLUTION                              | 10047838 | 11 |
| WITHDRAWAL SYNDROME                          | 10048010 | 11 |
| TUBULOINTERSTITIAL NEPHRITIS                 | 10048302 | 11 |
| KIDNEY ENLARGEMENT                           | 10048469 | 11 |
| ATRIAL THROMBOSIS                            | 10048632 | 11 |
| RED BLOOD CELL SEDIMENTATION RATE DECREASED  | 10049188 | 11 |
| INTRA-UTERINE CONTRACEPTIVE DEVICE INSERTION | 10049480 | 11 |

|                                              |          |    |
|----------------------------------------------|----------|----|
| BLOOD HOMOCYSTEINE NORMAL                    | 10049736 | 11 |
| CERVICAL VERTEBRAL FRACTURE                  | 10049946 | 11 |
| AMMONIA                                      | 10050287 | 11 |
| CAST APPLICATION                             | 10050305 | 11 |
| CERULOPLASMIN                                | 10050646 | 11 |
| LOWER GASTROINTESTINAL HAEMORRHAGE           | 10050953 | 11 |
| BIOPSY ARTERY                                | 10051409 | 11 |
| HYPOAESTHESIA TEETH                          | 10051780 | 11 |
| ALLERGY TO METALS                            | 10066414 | 11 |
| RETROPERITONEAL LYMPHADENOPATHY              | 10067015 | 11 |
| TEMPERATURE DIFFERENCE OF EXTREMITIES        | 10068016 | 11 |
| BONE DENSITY ABNORMAL                        | 10068789 | 11 |
| PRODUCT CONTAMINATION PHYSICAL               | 10069176 | 11 |
| COMA SCALE ABNORMAL                          | 10069709 | 11 |
| HELICOBACTER TEST POSITIVE                   | 10070101 | 11 |
| BURNING FEET SYNDROME                        | 10070237 | 11 |
| MYCOBACTERIUM TEST NEGATIVE                  | 10070408 | 11 |
| NEOVASCULAR AGE-RELATED MACULAR DEGENERATION | 10071129 | 11 |
| GIARDIA TEST NEGATIVE                        | 10072429 | 11 |
| SUBCHORIONIC HAEMATOMA                       | 10072596 | 11 |
| OPTICAL COHERENCE TOMOGRAPHY ABNORMAL        | 10073561 | 11 |
| SPONTANEOUS HAEMORRHAGE                      | 10074557 | 11 |
| NASAL HERPES                                 | 10074936 | 11 |
| RHESUS ANTIGEN POSITIVE                      | 10076520 | 11 |
| INTRUSIVE THOUGHTS                           | 10077275 | 11 |
| SPEECH SOUND DISORDER                        | 10077803 | 11 |
| ORAL SOFT TISSUE BIOPSY                      | 10078906 | 11 |
| VISUAL SNOW SYNDROME                         | 10079450 | 11 |
| SENSORY OVERLOAD                             | 10079780 | 11 |
| PARANASAL SINUS HYPOSECRETION                | 10080046 | 11 |
| COMPLICATED APPENDICITIS                     | 10081534 | 11 |
| PULMONARY IMAGING PROCEDURE ABNORMAL         | 10082582 | 11 |
| FLUORESCENCE ANGIOGRAM ABNORMAL              | 10083087 | 11 |
| FOLLICULAR LYMPHOMA                          | 10085128 | 11 |
| SECOND TRIMESTER PREGNANCY                   | 10052396 | 11 |
| SKIN BACTERIAL INFECTION                     | 10052891 | 11 |
| FRACTURE DISPLACEMENT                        | 10053206 | 11 |
| SLEEP STUDY NORMAL                           | 10053321 | 11 |
| VASCULAR OCCLUSION                           | 10053648 | 11 |
| TRI-IODOTHYRONINE FREE INCREASED             | 10053790 | 11 |
| BURSA DISORDER                               | 10056337 | 11 |
| GYNAECOLOGICAL EXAMINATION NORMAL            | 10056829 | 11 |
| INTERVERTEBRAL DISC OPERATION                | 10057322 | 11 |

|                                              |          |    |
|----------------------------------------------|----------|----|
| CARDIAC VALVE VEGETATION                     | 10057651 | 11 |
| JUVENILE IDIOPATHIC ARTHRITIS                | 10059176 | 11 |
| ENDOCRINE TEST                               | 10059689 | 11 |
| ANTICOAGULATION DRUG LEVEL ABOVE THERAPEUTIC | 10060320 | 11 |
| AUTOANTIBODY NEGATIVE                        | 10060974 | 11 |
| PAPILLOMA VIRAL INFECTION                    | 10061331 | 11 |
| PERINEAL PAIN                                | 10061339 | 11 |
| ARTERIOGRAM                                  | 10061658 | 11 |
| BLOOD PH                                     | 10061724 | 11 |
| GASTRECTOMY                                  | 10061965 | 11 |
| C1 ESTERASE INHIBITOR TEST                   | 10062730 | 11 |
| MYASTHENIA GRAVIS CRISIS                     | 10062758 | 11 |
| GENE MUTATION IDENTIFICATION TEST POSITIVE   | 10063478 | 11 |
| COAGULATION TEST ABNORMAL                    | 10063557 | 11 |
| CEREBRAL ARTERY STENOSIS                     | 10063648 | 11 |
| TONSILLOLITH                                 | 10063957 | 11 |
| NON-HIGH-DENSITY LIPOPROTEIN CHOLESTEROL     | 10063984 | 11 |
| HORMONE THERAPY                              | 10065646 | 11 |
| INJECTION SITE PALLOR                        | 10066041 | 11 |
| ABNORMAL WEIGHT GAIN                         | 10000188 | 10 |
| ABSCESS ORAL                                 | 10000311 | 10 |
| ACUTE PSYCHOSIS                              | 10001022 | 10 |
| ALPHA 1 FOETOPROTEIN                         | 10001772 | 10 |
| AMYLASE DECREASED                            | 10002014 | 10 |
| ANGLE CLOSURE GLAUCOMA                       | 10002500 | 10 |
| AORTIC VALVE STENOSIS                        | 10002918 | 10 |
| APNOEIC ATTACK                               | 10002977 | 10 |
| APPLICATION SITE PAIN                        | 10003051 | 10 |
| BARIUM SWALLOW ABNORMAL                      | 10004125 | 10 |
| BENIGN BREAST NEOPLASM                       | 10004243 | 10 |
| BIOPSY COLON                                 | 10004759 | 10 |
| BLOOD COPPER NORMAL                          | 10005444 | 10 |
| BLOOD CORTICOTROPHIN                         | 10005450 | 10 |
| BLOOD IMMUNOGLOBULIN E NORMAL                | 10005592 | 10 |
| BLOOD LUTEINISING HORMONE DECREASED          | 10005648 | 10 |
| BLOOD LUTEINISING HORMONE INCREASED          | 10005649 | 10 |
| CEREBROVASCULAR DISORDER                     | 10008196 | 10 |
| COMPLEMENT FACTOR C3 INCREASED               | 10010126 | 10 |
| COUGH DECREASED                              | 10011225 | 10 |
| CSF CELL COUNT NORMAL                        | 10011523 | 10 |
| CSF PRESSURE INCREASED                       | 10011570 | 10 |
| DISSOCIATIVE DISORDER                        | 10013462 | 10 |
| ENZYME ABNORMALITY                           | 10014935 | 10 |

|                                 |          |    |
|---------------------------------|----------|----|
| EPINEPHRINE INCREASED           | 10015064 | 10 |
| HAEMORRHAGIC DISORDER           | 10019009 | 10 |
| HAEMOTHORAX                     | 10019027 | 10 |
| HEPATIC VEIN THROMBOSIS         | 10019713 | 10 |
| HEPATITIS B                     | 10019731 | 10 |
| HYPERMETROPIA                   | 10020675 | 10 |
| HYPOCHLORAEMIA                  | 10020955 | 10 |
| HYPOCHROMIC ANAEMIA             | 10020969 | 10 |
| INTENTIONAL OVERDOSE            | 10022523 | 10 |
| KETOACIDOSIS                    | 10023379 | 10 |
| LABIA ENLARGED                  | 10023527 | 10 |
| LIBIDO DECREASED                | 10024419 | 10 |
| MASTOIDITIS                     | 10026900 | 10 |
| NEPHRITIS                       | 10029117 | 10 |
| OESTRADIOL INCREASED            | 10030231 | 10 |
| OESTRADIOL NORMAL               | 10030233 | 10 |
| ORBITAL OEDEMA                  | 10031051 | 10 |
| OXYGEN SATURATION INCREASED     | 10033320 | 10 |
| PATELLA FRACTURE                | 10034122 | 10 |
| PCO2                            | 10034180 | 10 |
| PERNICIOUS ANAEMIA              | 10034695 | 10 |
| PLEURAL THICKENING              | 10035616 | 10 |
| PNEUMONIA PSEUDOMONAL           | 10035731 | 10 |
| POLYCHROMASIA                   | 10036040 | 10 |
| POLYCYTHAEMIA                   | 10036051 | 10 |
| REFLEXES ABNORMAL               | 10038254 | 10 |
| RENAL VEIN THROMBOSIS           | 10038548 | 10 |
| RETINAL OEDEMA                  | 10038886 | 10 |
| SCLERAL DISCOLOURATION          | 10039696 | 10 |
| SPLENECTOMY                     | 10041642 | 10 |
| STILL'S DISEASE                 | 10042061 | 10 |
| SUTURE REMOVAL                  | 10042640 | 10 |
| TACHYCARDIA FOETAL              | 10043074 | 10 |
| TELANGIECTASIA                  | 10043189 | 10 |
| THYROTOXIC CRISIS               | 10043786 | 10 |
| TOBACCO ABUSE                   | 10043903 | 10 |
| VENTRICULAR ARRHYTHMIA          | 10047281 | 10 |
| VESTIBULAR FUNCTION TEST NORMAL | 10047391 | 10 |
| VIRAL MYOCARDITIS               | 10047470 | 10 |
| VISUAL ACUITY TESTS ABNORMAL    | 10047534 | 10 |
| ANEURYSM RUPTURED               | 10048380 | 10 |
| ORAL INFECTION                  | 10048685 | 10 |
| UNDERWEIGHT                     | 10048828 | 10 |



|                                                |          |    |
|------------------------------------------------|----------|----|
| UTERINE CYST                                   | 10048931 | 10 |
| ANTIACETYLCHOLINE RECEPTOR ANTIBODY POSITIVE   | 10049144 | 10 |
| SUDDEN CARDIAC DEATH                           | 10049418 | 10 |
| ABNORMAL CLOTTING FACTOR                       | 10049862 | 10 |
| THORACIC VERTEBRAL FRACTURE                    | 10049948 | 10 |
| ELECTROCARDIOGRAM PR INTERVAL                  | 10050656 | 10 |
| SPECIFIC GRAVITY URINE INCREASED               | 10050773 | 10 |
| MACULAR HOLE                                   | 10051058 | 10 |
| ENCEPHALOMALACIA                               | 10051818 | 10 |
| FOETAL CARDIAC DISORDER                        | 10052088 | 10 |
| CONTRAST MEDIA ALLERGY                         | 10066973 | 10 |
| HAEMOSTASIS                                    | 10067439 | 10 |
| HOSPICE CARE                                   | 10067973 | 10 |
| AXILLARY LYMPHADENECTOMY                       | 10068477 | 10 |
| ANISOMASTIA                                    | 10068732 | 10 |
| MANUAL LYMPHATIC DRAINAGE                      | 10068967 | 10 |
| LIQUID PRODUCT PHYSICAL ISSUE                  | 10069224 | 10 |
| VACCINATION SITE ABSCESS                       | 10069556 | 10 |
| PROTEUS TEST POSITIVE                          | 10070134 | 10 |
| HYPOXIC-ISCHAEMIC ENCEPHALOPATHY               | 10070511 | 10 |
| HEPARIN-INDUCED THROMBOCYTOPENIA TEST POSITIVE | 10070664 | 10 |
| MEDICAL INDUCTION OF COMA                      | 10070677 | 10 |
| HEPATITIS B CORE ANTIBODY NEGATIVE             | 10071345 | 10 |
| BANDAEMIA                                      | 10072081 | 10 |
| DRUG-INDUCED LIVER INJURY                      | 10072268 | 10 |
| FAECAL CALPROTECTIN INCREASED                  | 10072482 | 10 |
| HEPATIC CANCER                                 | 10073069 | 10 |
| JOINT VIBRATION                                | 10074327 | 10 |
| SCALLOPED TONGUE                               | 10074686 | 10 |
| EYELID CONTUSION                               | 10075018 | 10 |
| BARTONELLA TEST                                | 10075209 | 10 |
| NONINFECTIVE SIALOADENITIS                     | 10075243 | 10 |
| QUANTITATIVE SUDOMOTOR AXON REFLEX TEST        | 10075351 | 10 |
| SWALLOW STUDY ABNORMAL                         | 10076037 | 10 |
| CHA2DS2-VASC-SCORE                             | 10076965 | 10 |
| MULTIPATHOGEN PCR TEST                         | 10077018 | 10 |
| INFLAMMATORY MARKER DECREASED                  | 10077676 | 10 |
| PATIENT UNCOOPERATIVE                          | 10077706 | 10 |
| DECOMPRESSIVE CRANIECTOMY                      | 10078092 | 10 |
| SKIN CULTURE                                   | 10078401 | 10 |
| HOUSEBOUND                                     | 10079226 | 10 |
| MITRAL VALVE THICKENING                        | 10079336 | 10 |
| PERFUSION BRAIN SCAN                           | 10079705 | 10 |

|                                                |          |    |
|------------------------------------------------|----------|----|
| SALMONELLA TEST NEGATIVE                       | 10079858 | 10 |
| ALCOHOL TEST NEGATIVE                          | 10081298 | 10 |
| ROBOTIC SURGERY                                | 10082954 | 10 |
| MAGNETIC RESONANCE IMAGING ABDOMINAL NORMAL    | 10083135 | 10 |
| COGNITIVE TEST                                 | 10083267 | 10 |
| ULTRASOUND SPLEEN                              | 10083327 | 10 |
| EPSTEIN-BARR VIRUS ANTIGEN POSITIVE            | 10052363 | 10 |
| ELECTROCARDIOGRAM REPOLARISATION ABNORMALITY   | 10052464 | 10 |
| VASCULAR IMAGING                               | 10052677 | 10 |
| MYCOTIC ALLERGY                                | 10052758 | 10 |
| MEDICAL DEVICE REMOVAL                         | 10052971 | 10 |
| BRONCHITIS VIRAL                               | 10053160 | 10 |
| ARTHRITIS BACTERIAL                            | 10053555 | 10 |
| WOUND COMPLICATION                             | 10053692 | 10 |
| URINARY TRACT INFECTION BACTERIAL              | 10054088 | 10 |
| EPIDURAL BLOOD PATCH                           | 10055034 | 10 |
| HAEMORRHAGIC TRANSFORMATION STROKE             | 10055677 | 10 |
| ADENOMYOSIS                                    | 10056268 | 10 |
| ASYMPTOMATIC BACTERIURIA                       | 10056396 | 10 |
| MONOCLONAL ANTIBODY UNCONJUGATED THERAPY       | 10056417 | 10 |
| CUTANEOUS LUPUS ERYTHEMATOSUS                  | 10056509 | 10 |
| ORAL PUSTULE                                   | 10056674 | 10 |
| SKIN LAXITY                                    | 10057064 | 10 |
| VOCAL CORD INFLAMMATION                        | 10057295 | 10 |
| INCISION SITE PAIN                             | 10058043 | 10 |
| GASTROINTESTINAL OEDEMA                        | 10058061 | 10 |
| PULMONARY ARTERY DILATATION                    | 10058491 | 10 |
| INFREQUENT BOWEL MOVEMENTS                     | 10059158 | 10 |
| NITRITE URINE                                  | 10059220 | 10 |
| SEDATIVE THERAPY                               | 10059283 | 10 |
| BAND NEUTROPHIL PERCENTAGE                     | 10059468 | 10 |
| RUSSELL'S VIPER VENOM TIME                     | 10059775 | 10 |
| TONGUE INJURY                                  | 10059924 | 10 |
| PARASITIC BLOOD TEST NEGATIVE                  | 10059992 | 10 |
| COMPUTERISED TOMOGRAM CORONARY ARTERY ABNORMAL | 10060806 | 10 |
| ARTERIAL STENOSIS                              | 10060965 | 10 |
| AUTOANTIBODY POSITIVE                          | 10060973 | 10 |
| SPUTUM ABNORMAL                                | 10060991 | 10 |
| ORAL FUNGAL INFECTION                          | 10061324 | 10 |
| VAGINAL DISORDER                               | 10061402 | 10 |
| AUTONOMIC NEUROPATHY                           | 10061666 | 10 |
| SALIVARY GLAND DISORDER                        | 10061935 | 10 |
| GALLBLADDER OPERATION                          | 10061962 | 10 |

|                                     |          |    |
|-------------------------------------|----------|----|
| HERNIA REPAIR                       | 10062003 | 10 |
| LYMPHOCYTE MORPHOLOGY ABNORMAL      | 10062047 | 10 |
| METASTASIS                          | 10062194 | 10 |
| TONGUE EXFOLIATION                  | 10064488 | 10 |
| PULMONARY ARTERIAL HYPERTENSION     | 10064911 | 10 |
| URINARY TRACT INFLAMMATION          | 10064921 | 10 |
| PERIVASCULAR DERMATITIS             | 10064986 | 10 |
| PELVIC FLUID COLLECTION             | 10065388 | 10 |
| BRACHIAL PLEXOPATHY                 | 10065417 | 10 |
| HEPATOBIILIARY SCAN ABNORMAL        | 10066195 | 10 |
| ACCELERATED HYPERTENSION            | 10000358 | 9  |
| ACUTE LYMPHOCYTIC LEUKAEMIA         | 10000846 | 9  |
| ADRENAL ADENOMA                     | 10001323 | 9  |
| ALDOLASE NORMAL                     | 10001643 | 9  |
| ANAESTHESIA                         | 10002091 | 9  |
| ARNOLD-CHIARI MALFORMATION          | 10003101 | 9  |
| BIOPSY THYROID GLAND NORMAL         | 10004890 | 9  |
| BLOOD ALDOSTERONE                   | 10005293 | 9  |
| BLOOD IMMUNOGLOBULIN A INCREASED    | 10005586 | 9  |
| BLOOD LUTEINISING HORMONE NORMAL    | 10005650 | 9  |
| BLOOD POTASSIUM ABNORMAL            | 10005722 | 9  |
| BLOOD PRESSURE DIASTOLIC DECREASED  | 10005737 | 9  |
| BREAST NEOPLASM                     | 10006279 | 9  |
| BREATH HOLDING                      | 10006322 | 9  |
| CALCULUS URINARY                    | 10007027 | 9  |
| CHRONIC MYELOID LEUKAEMIA           | 10009013 | 9  |
| CROUP INFECTIOUS                    | 10011416 | 9  |
| CSF GLUCOSE DECREASED               | 10011537 | 9  |
| CSF OLIGOCLONAL BAND ABSENT         | 10011560 | 9  |
| CULTURE STOOL POSITIVE              | 10011631 | 9  |
| CULTURE WOUND NEGATIVE              | 10011642 | 9  |
| CYTOMEGALOVIRUS INFECTION           | 10011831 | 9  |
| DAIRY INTOLERANCE                   | 10011852 | 9  |
| DEFECT CONDUCTION INTRAVENTRICULAR  | 10012118 | 9  |
| DERMATOCHALASIS                     | 10012493 | 9  |
| DRUG ABUSE                          | 10013654 | 9  |
| ENDOCRINE DISORDER                  | 10014695 | 9  |
| EXERCISE ELECTROCARDIOGRAM ABNORMAL | 10015645 | 9  |
| GRANULOCYTE COUNT INCREASED         | 10018683 | 9  |
| HAEMOCHROMATOSIS                    | 10018872 | 9  |
| HAPTOGLOBIN NORMAL                  | 10019154 | 9  |
| HYDROPS FOETALIS                    | 10020529 | 9  |
| INTENTIONAL SELF-INJURY             | 10022524 | 9  |

|                                       |          |   |
|---------------------------------------|----------|---|
| IRON BINDING CAPACITY TOTAL DECREASED | 10022963 | 9 |
| JUDGEMENT IMPAIRED                    | 10023236 | 9 |
| LAPAROTOMY                            | 10023696 | 9 |
| LARGE INTESTINAL ULCER                | 10023799 | 9 |
| LIPASE DECREASED                      | 10024573 | 9 |
| LIPIDS ABNORMAL                       | 10024588 | 9 |
| MENARCHE                              | 10027182 | 9 |
| MITRAL VALVE STENOSIS                 | 10027733 | 9 |
| MYELODYSPLASTIC SYNDROME              | 10028533 | 9 |
| NASAL POLYPS                          | 10028756 | 9 |
| OBSTRUCTION GASTRIC                   | 10029957 | 9 |
| OESOPHAGEAL DILATATION                | 10030164 | 9 |
| OESOPHAGEAL ULCER                     | 10030201 | 9 |
| OLIGOHYDRAMNIOS                       | 10030289 | 9 |
| ONYCHOLYSIS                           | 10030337 | 9 |
| OROPHARYNGEAL SWELLING                | 10031118 | 9 |
| OSTEONECROSIS                         | 10031264 | 9 |
| PARAPLEGIA                            | 10033892 | 9 |
| PARESIS                               | 10033985 | 9 |
| PELVIC INFLAMMATORY DISEASE           | 10034254 | 9 |
| PLICATED TONGUE                       | 10035630 | 9 |
| PNEUMONIA MYCOPLASMAL                 | 10035724 | 9 |
| PNEUMONIA PNEUMOCOCCAL                | 10035728 | 9 |
| PULMONARY ALVEOLAR HAEMORRHAGE        | 10037313 | 9 |
| SACROILIITIS                          | 10039361 | 9 |
| SEXUALLY TRANSMITTED DISEASE          | 10040490 | 9 |
| SINUS ARREST                          | 10040738 | 9 |
| SKIN HYPOPIGMENTATION                 | 10040868 | 9 |
| SPECIFIC GRAVITY URINE                | 10041438 | 9 |
| SPINAL CORD INJURY CERVICAL           | 10041554 | 9 |
| SQUAMOUS CELL CARCINOMA OF SKIN       | 10041834 | 9 |
| TORSADE DE POINTES                    | 10044066 | 9 |
| TRANSPLANT REJECTION                  | 10044439 | 9 |
| TYMPANOMETRY ABNORMAL                 | 10045215 | 9 |
| UTERINE ENLARGEMENT                   | 10046782 | 9 |
| UTERINE INFLAMMATION                  | 10046793 | 9 |
| VENTRICULAR SEPTAL DEFECT             | 10047298 | 9 |
| VERY LOW DENSITY LIPOPROTEIN          | 10047351 | 9 |
| PNEUMOPERITONEUM                      | 10048299 | 9 |
| ISCHAEMIC CARDIOMYOPATHY              | 10048858 | 9 |
| VASCULAR PSEUDOANEURYSM               | 10048975 | 9 |
| HELLP SYNDROME                        | 10049058 | 9 |
| PANCREATIC MASS                       | 10049082 | 9 |

|                                          |          |   |
|------------------------------------------|----------|---|
| PSYCHOMOTOR SKILLS IMPAIRED              | 10049215 | 9 |
| GINGIVAL ULCERATION                      | 10049398 | 9 |
| PUBIC PAIN                               | 10049747 | 9 |
| MEDICAL DEVICE IMPLANTATION              | 10049812 | 9 |
| IMPATIENCE                               | 10049976 | 9 |
| ENEMA ADMINISTRATION                     | 10050314 | 9 |
| RIGHT VENTRICULAR ENLARGEMENT            | 10050582 | 9 |
| CSF GLUCOSE INCREASED                    | 10050763 | 9 |
| COMPLEMENT FACTOR C4 INCREASED           | 10050982 | 9 |
| STREPTOCOCCAL BACTERAEMIA                | 10051018 | 9 |
| CARBOHYDRATE ANTIGEN 125 INCREASED       | 10051414 | 9 |
| BONE EROSION                             | 10051728 | 9 |
| REFLUX LARYNGITIS                        | 10067869 | 9 |
| SALT CRAVING                             | 10067951 | 9 |
| CAPILLARY NAIL REFILL TEST ABNORMAL      | 10069381 | 9 |
| BED SHARING                              | 10069595 | 9 |
| COXSACKIE VIRUS TEST                     | 10070394 | 9 |
| CANDIDA TEST POSITIVE                    | 10070451 | 9 |
| BAND SENSATION                           | 10070714 | 9 |
| SOFT TISSUE MASS                         | 10071051 | 9 |
| SMEAR VAGINAL NORMAL                     | 10071320 | 9 |
| ANTI-TRANSGLUTAMINASE ANTIBODY           | 10071472 | 9 |
| FOETAL NON-STRESS TEST ABNORMAL          | 10071516 | 9 |
| ENZYME LEVEL INCREASED                   | 10072234 | 9 |
| BENZODIAZEPINE DRUG LEVEL                | 10072337 | 9 |
| ANTI-TRANSGLUTAMINASE ANTIBODY NEGATIVE  | 10072526 | 9 |
| CHRONIC PIGMENTED PURPURA                | 10072726 | 9 |
| HYSTEROSCOPY NORMAL                      | 10074342 | 9 |
| CANCER SURGERY                           | 10074431 | 9 |
| SPLENIC THROMBOSIS                       | 10074601 | 9 |
| VACCINATION SITE DRYNESS                 | 10076159 | 9 |
| COMPUTERISED TOMOGRAM LIVER              | 10076215 | 9 |
| RHESUS ANTIGEN NEGATIVE                  | 10076521 | 9 |
| EYE PARAESTHESIA                         | 10076569 | 9 |
| COMPUTERISED TOMOGRAM INTESTINE          | 10077359 | 9 |
| FOETAL GROWTH ABNORMALITY                | 10077582 | 9 |
| LIVER FUNCTION TEST DECREASED            | 10077677 | 9 |
| SOMATIC SYMPTOM DISORDER                 | 10078076 | 9 |
| OPHTHALMIC SCAN                          | 10078104 | 9 |
| BUTTOCK INJURY                           | 10078480 | 9 |
| PERSISTENT POSTURAL-PERCEPTUAL DIZZINESS | 10079170 | 9 |
| VULVOVAGINAL INFLAMMATION                | 10079372 | 9 |
| FOCAL DYSCOGNITIVE SEIZURES              | 10079424 | 9 |

|                                                  |          |   |
|--------------------------------------------------|----------|---|
| OBSTRUCTIVE PANCREATITIS                         | 10079822 | 9 |
| EXPLODING HEAD SYNDROME                          | 10080684 | 9 |
| URINARY SEDIMENT                                 | 10080828 | 9 |
| CENTRAL VISION LOSS                              | 10081186 | 9 |
| SUBACUTE INFLAMMATORY DEMYELINATING POLYNEUROPAT | 10081726 | 9 |
| IMMATURE GRANULOCYTE PERCENTAGE INCREASED        | 10082033 | 9 |
| ORAL MUCOSAL ROUGHENING                          | 10084009 | 9 |
| ABNORMAL CORD INSERTION                          | 10084854 | 9 |
| THIRD TRIMESTER PREGNANCY                        | 10052397 | 9 |
| SALINE INFUSION SONOGRAM                         | 10052604 | 9 |
| EMERGENCY CARE EXAMINATION                       | 10053069 | 9 |
| PHYSICAL BREAST EXAMINATION                      | 10053478 | 9 |
| URINE ALBUMIN/CREATININE RATIO                   | 10053542 | 9 |
| LIMB DEFORMITY                                   | 10053652 | 9 |
| HAEMORRHOIDAL HAEMORRHAGE                        | 10054787 | 9 |
| LYMPH NODE CALCIFICATION                         | 10056284 | 9 |
| INTRA-ABDOMINAL HAEMATOMA                        | 10056457 | 9 |
| DENTAL EXAMINATION NORMAL                        | 10056827 | 9 |
| GYNAECOLOGICAL EXAMINATION ABNORMAL              | 10056830 | 9 |
| THERAPEUTIC EMBOLISATION                         | 10057335 | 9 |
| BLOOD KETONE BODY INCREASED                      | 10057594 | 9 |
| QRS AXIS                                         | 10057622 | 9 |
| TOTAL CHOLESTEROL/HDL RATIO                      | 10058632 | 9 |
| BREAST MILK DISCOLOURATION                       | 10058665 | 9 |
| HIV ANTIGEN NEGATIVE                             | 10058764 | 9 |
| ADNEXA UTERI MASS                                | 10058897 | 9 |
| INTESTINAL HAEMORRHAGE                           | 10059175 | 9 |
| METASTASES TO CENTRAL NERVOUS SYSTEM             | 10059282 | 9 |
| RADICULAR PAIN                                   | 10059604 | 9 |
| PLASMINOGEN ACTIVATOR INHIBITOR                  | 10059620 | 9 |
| BLOOD SMEAR TEST NORMAL                          | 10059664 | 9 |
| COAGULATION FACTOR                               | 10059744 | 9 |
| LEFT VENTRICULAR END-DIASTOLIC PRESSURE          | 10060065 | 9 |
| RED BLOOD CELL MORPHOLOGY NORMAL                 | 10060197 | 9 |
| INTERVERTEBRAL DISCITIS                          | 10060738 | 9 |
| DUODENOGASTRIC REFLUX                            | 10060865 | 9 |
| CALCIUM IONISED DECREASED                        | 10060898 | 9 |
| DNA ANTIBODY NEGATIVE                            | 10061109 | 9 |
| ECONOMIC PROBLEM                                 | 10061114 | 9 |
| ELECTROCARDIOGRAM CHANGE                         | 10061116 | 9 |
| MASTOID DISORDER                                 | 10061277 | 9 |
| VAGUS NERVE DISORDER                             | 10061403 | 9 |
| CORNEAL DISORDER                                 | 10061453 | 9 |

|                                             |          |   |
|---------------------------------------------|----------|---|
| ULCER HAEMORRHAGE                           | 10061577 | 9 |
| FACIAL NEURALGIA                            | 10061594 | 9 |
| ARTERIAL STENT INSERTION                    | 10061657 | 9 |
| CAROTID ARTERY DISEASE                      | 10061744 | 9 |
| DENTAL OPERATION                            | 10061812 | 9 |
| LITHOTRIPSY                                 | 10062039 | 9 |
| LARGE INTESTINAL OBSTRUCTION                | 10062062 | 9 |
| TYMPANIC MEMBRANE DISORDER                  | 10062218 | 9 |
| GRIP STRENGTH                               | 10062557 | 9 |
| UTERINE MASS                                | 10062662 | 9 |
| ANKLE BRACHIAL INDEX                        | 10062762 | 9 |
| PROGESTERONE NORMAL                         | 10063273 | 9 |
| ENDOTRACHEAL INTUBATION COMPLICATION        | 10063349 | 9 |
| EYELID EXFOLIATION                          | 10064580 | 9 |
| MEIBOMIAN GLAND DYSFUNCTION                 | 10065062 | 9 |
| EXTENSIVE SWELLING OF VACCINATED LIMB       | 10065106 | 9 |
| MEDIAL TIBIAL STRESS SYNDROME               | 10065303 | 9 |
| NIH STROKE SCALE ABNORMAL                   | 10065531 | 9 |
| EXTERNAL EAR INFLAMMATION                   | 10065837 | 9 |
| STRESS URINARY INCONTINENCE                 | 10066218 | 9 |
| MULTISYSTEM INFLAMMATORY SYNDROME IN ADULTS | 10085850 | 9 |
| SPONTANEOUS RUPTURE OF MEMBRANES            | 10087390 | 9 |
| ALANINE AMINOTRANSFERASE DECREASED          | 10001549 | 8 |
| ALDOLASE INCREASED                          | 10001642 | 8 |
| AMNIOCENTESIS NORMAL                        | 10001963 | 8 |
| AMYLOIDOSIS                                 | 10002022 | 8 |
| ANTIMICROBIAL SUSCEPTIBILITY TEST           | 10002791 | 8 |
| AORTIC VALVE SCLEROSIS                      | 10002917 | 8 |
| ASTIGMATISM                                 | 10003569 | 8 |
| BACTERIURIA                                 | 10004056 | 8 |
| BARIUM SWALLOW NORMAL                       | 10004126 | 8 |
| BARRETT'S OESOPHAGUS                        | 10004137 | 8 |
| BIOPSY HEART                                | 10004779 | 8 |
| BIOPSY SITE UNSPECIFIED ABNORMAL            | 10004871 | 8 |
| BIPOLAR I DISORDER                          | 10004939 | 8 |
| BLADDER DILATATION                          | 10005033 | 8 |
| BLADDER IRRITATION                          | 10005052 | 8 |
| BLISTER INFECTED                            | 10005192 | 8 |
| BLOOD ETHANOL NORMAL                        | 10005516 | 8 |
| BLOOD PARATHYROID HORMONE NORMAL            | 10005704 | 8 |
| BRONCHIAL IRRITATION                        | 10006438 | 8 |
| BRONCHOSCOPY NORMAL                         | 10006481 | 8 |
| BURNING SENSATION MUCOSAL                   | 10006789 | 8 |

|                                 |          |   |
|---------------------------------|----------|---|
| BURNS THIRD DEGREE              | 10006803 | 8 |
| CALCINOSIS                      | 10006938 | 8 |
| CEREBELLAR HAEMORRHAGE          | 10008030 | 8 |
| CHOREA                          | 10008748 | 8 |
| CIRCADIAN RHYTHM SLEEP DISORDER | 10009191 | 8 |
| COAGULATION FACTOR V LEVEL      | 10009752 | 8 |
| COLD URTICARIA                  | 10009869 | 8 |
| COMPARTMENT SYNDROME            | 10010121 | 8 |
| COMPLETED SUICIDE               | 10010144 | 8 |
| CONJUNCTIVAL OEDEMA             | 10010726 | 8 |
| CSF LYMPHOCYTE COUNT NORMAL     | 10011550 | 8 |
| DERMATITIS DIAPER               | 10012444 | 8 |
| DIAPHRAGMATIC PARALYSIS         | 10012725 | 8 |
| DRUG SPECIFIC ANTIBODY ABSENT   | 10013744 | 8 |
| ELECTROCARDIOGRAM QRS COMPLEX   | 10014377 | 8 |
| EMOTIONAL POVERTY               | 10014557 | 8 |
| ENDOSCOPY GASTROINTESTINAL      | 10014809 | 8 |
| ERYTHEMA ANNULARE               | 10015153 | 8 |
| ESSENTIAL THROMBOCYTHAEMIA      | 10015493 | 8 |
| EYE INFECTION BACTERIAL         | 10015930 | 8 |
| FEELINGS OF WORTHLESSNESS       | 10016374 | 8 |
| GLOMERULONEPHRITIS MEMBRANOUS   | 10018372 | 8 |
| GLUCOSE TOLERANCE TEST NORMAL   | 10018435 | 8 |
| HEAT EXHAUSTION                 | 10019332 | 8 |
| HIV TEST POSITIVE               | 10020188 | 8 |
| HYPERAEMIA                      | 10020565 | 8 |
| HYPERCHLORHYDRIA                | 10020601 | 8 |
| HYPOHIDROSIS                    | 10021013 | 8 |
| INCREASED INSULIN REQUIREMENT   | 10021664 | 8 |
| INJECTION SITE THROMBOSIS       | 10022104 | 8 |
| INSULIN C-PEPTIDE               | 10022474 | 8 |
| INTESTINAL DILATATION           | 10022642 | 8 |
| INTUSSUSCEPTION                 | 10022863 | 8 |
| JOB DISSATISFACTION             | 10023193 | 8 |
| LARYNGOSCOPY ABNORMAL           | 10023889 | 8 |
| MALIGNANT HYPERTENSION          | 10025600 | 8 |
| MEAN CELL VOLUME ABNORMAL       | 10027000 | 8 |
| MULTIPLE FRACTURES              | 10028200 | 8 |
| NASAL SEPTUM DEVIATION          | 10028762 | 8 |
| NON-CONSUMMATION                | 10029540 | 8 |
| OEDEMA MOUTH                    | 10030110 | 8 |
| ORAL MUCOSAL DISCOLOURATION     | 10030996 | 8 |
| OTITIS MEDIA ACUTE              | 10033079 | 8 |



|                                   |          |   |
|-----------------------------------|----------|---|
| PANCREATITIS CHRONIC              | 10033649 | 8 |
| PANCREATITIS NECROTISING          | 10033654 | 8 |
| PAPILLARY THYROID CANCER          | 10033701 | 8 |
| PATHOLOGICAL FRACTURE             | 10034156 | 8 |
| PELVIC MASS                       | 10034260 | 8 |
| PERITONSILLAR ABSCESS             | 10034686 | 8 |
| PNEUMOTHORAX SPONTANEOUS          | 10035763 | 8 |
| POLYMYOSITIS                      | 10036102 | 8 |
| PUPILLARY DISORDER                | 10037521 | 8 |
| RESPIRATORY ALKALOSIS             | 10038664 | 8 |
| RETINAL VEIN THROMBOSIS           | 10038908 | 8 |
| RETROPERITONEAL HAEMORRHAGE       | 10038980 | 8 |
| RUBBER SENSITIVITY                | 10039251 | 8 |
| SOCIAL AVOIDANT BEHAVIOUR         | 10041243 | 8 |
| SOFT TISSUE INFLAMMATION          | 10041290 | 8 |
| SPINAL CORD INJURY                | 10041552 | 8 |
| SPIROMETRY NORMAL                 | 10041631 | 8 |
| SPLENIC RUPTURE                   | 10041658 | 8 |
| SPLENIC VEIN THROMBOSIS           | 10041659 | 8 |
| SPLINTER HAEMORRHAGES             | 10041663 | 8 |
| STARVATION                        | 10041954 | 8 |
| SUDDEN VISUAL LOSS                | 10042441 | 8 |
| SYSTEMIC LUPUS ERYTHEMATOSUS RASH | 10042946 | 8 |
| THERAPEUTIC RESPONSE DECREASED    | 10043414 | 8 |
| ULTRASOUND BLADDER NORMAL         | 10045408 | 8 |
| URINARY HESITATION                | 10046542 | 8 |
| VASOCONSTRICTION                  | 10047139 | 8 |
| VENA CAVA THROMBOSIS              | 10047195 | 8 |
| VERTEBRAL ARTERY STENOSIS         | 10047330 | 8 |
| VITAMIN B6 NORMAL                 | 10047619 | 8 |
| VITREOUS HAEMORRHAGE              | 10047655 | 8 |
| TUMOUR MARKER INCREASED           | 10048621 | 8 |
| FEAR OF FALLING                   | 10048744 | 8 |
| MYOFASCIAL PAIN SYNDROME          | 10048780 | 8 |
| BREAST CALCIFICATIONS             | 10048782 | 8 |
| CHOLESTASIS OF PREGNANCY          | 10049055 | 8 |
| VASCULAR OPERATION                | 10049071 | 8 |
| MILLER FISHER SYNDROME            | 10049567 | 8 |
| LUNG CANCER METASTATIC            | 10050017 | 8 |
| CERUMEN IMPACTION                 | 10050337 | 8 |
| PARENTERAL NUTRITION              | 10051284 | 8 |
| STERNOTOMY                        | 10051501 | 8 |
| OSCILLOPSIA                       | 10052087 | 8 |

|                                                  |          |   |
|--------------------------------------------------|----------|---|
| ACTIVATED PROTEIN C RESISTANCE TEST              | 10067642 | 8 |
| DISEASE COMPLICATION                             | 10067671 | 8 |
| ANTIBIOTIC THERAPY                               | 10067768 | 8 |
| PRODUCT ODOUR ABNORMAL                           | 10069226 | 8 |
| PRODUCT CONTAINER ISSUE                          | 10069293 | 8 |
| MAY-THURNER SYNDROME                             | 10069727 | 8 |
| MYCOBACTERIUM TUBERCULOSIS COMPLEX TEST POSITIVE | 10070325 | 8 |
| MYCOBACTERIUM TEST                               | 10070407 | 8 |
| CANDIDA TEST NEGATIVE                            | 10070452 | 8 |
| DISTRIBUTIVE SHOCK                               | 10070559 | 8 |
| BODY FLUID ANALYSIS                              | 10070900 | 8 |
| PROCEDURAL HAEMORRHAGE                           | 10071229 | 8 |
| POST-TRAUMATIC NECK SYNDROME                     | 10071366 | 8 |
| THYROID STIMULATING IMMUNOGLOBULIN INCREASED     | 10071389 | 8 |
| RESTING TREMOR                                   | 10071390 | 8 |
| UNDIFFERENTIATED CONNECTIVE TISSUE DISEASE       | 10071575 | 8 |
| TYPICAL AURA WITHOUT HEADACHE                    | 10071669 | 8 |
| GIARDIA TEST                                     | 10072433 | 8 |
| INJECTION SITE PLAQUE                            | 10073174 | 8 |
| ASPERGILLUS INFECTION                            | 10074171 | 8 |
| NEUROMUSCULAR PAIN                               | 10074313 | 8 |
| VEIN COLLAPSE                                    | 10074621 | 8 |
| SUPINE POSITION                                  | 10074742 | 8 |
| METHYLENETETRAHYDROFOLATE REDUCTASE GENE MUTATIO | 10074753 | 8 |
| BURN ORAL CAVITY                                 | 10075532 | 8 |
| RESPIROVIRUS TEST                                | 10075548 | 8 |
| FACTOR V LEIDEN CARRIER                          | 10075652 | 8 |
| THYROID HORMONES DECREASED                       | 10075803 | 8 |
| VACCINATION SITE MACULE                          | 10076181 | 8 |
| ALLERGIC REACTION TO EXCIPIENT                   | 10078853 | 8 |
| AUTOIMMUNE THYROID DISORDER                      | 10079165 | 8 |
| RED EAR SYNDROME                                 | 10079225 | 8 |
| JOINT SPACE NARROWING                            | 10079942 | 8 |
| DRUG SPECIFIC ANTIBODY                           | 10080179 | 8 |
| TRICHOGLOSSIA                                    | 10080276 | 8 |
| SMALL AIRWAYS DISEASE                            | 10080547 | 8 |
| PULMONARY IMAGING PROCEDURE                      | 10082579 | 8 |
| PERIPHERAL VEIN OCCLUSION                        | 10083103 | 8 |
| SKIN DISCHARGE                                   | 10083144 | 8 |
| SARS-COV-1 TEST NEGATIVE                         | 10084445 | 8 |
| INJECTION SITE MUSCLE ATROPHY                    | 10084809 | 8 |
| TROPONIN DECREASED                               | 10084968 | 8 |
| THORACIC OPERATION                               | 10052703 | 8 |

|                                               |          |   |
|-----------------------------------------------|----------|---|
| PSYCHIATRIC EVALUATION                        | 10053336 | 8 |
| RED CELL DISTRIBUTION WIDTH DECREASED         | 10053921 | 8 |
| COMPUTERISED TOMOGRAM KIDNEY                  | 10054004 | 8 |
| EXPLORATORY OPERATION                         | 10056589 | 8 |
| GASTRIC INFECTION                             | 10056663 | 8 |
| PALATAL OEDEMA                                | 10056998 | 8 |
| DEPENDENCE ON RESPIRATOR                      | 10057482 | 8 |
| EAR IRRIGATION                                | 10058074 | 8 |
| BIOPSY ARTERY ABNORMAL                        | 10058364 | 8 |
| DERMATOLOGIC EXAMINATION ABNORMAL             | 10058380 | 8 |
| HYPOPERFUSION                                 | 10058558 | 8 |
| GENERAL PHYSICAL CONDITION                    | 10058912 | 8 |
| METANEPHRINE URINE                            | 10059217 | 8 |
| FUNGAL TEST POSITIVE                          | 10059423 | 8 |
| ANTICONVULSANT DRUG LEVEL                     | 10059466 | 8 |
| CYTOLOGY ABNORMAL                             | 10059523 | 8 |
| RETINOGRAM                                    | 10059661 | 8 |
| T-LYMPHOCYTE COUNT                            | 10059741 | 8 |
| RUSSELL'S VIPER VENOM TIME NORMAL             | 10059758 | 8 |
| RED BLOOD CELL MORPHOLOGY                     | 10059907 | 8 |
| BASE EXCESS INCREASED                         | 10059993 | 8 |
| BASE EXCESS DECREASED                         | 10059994 | 8 |
| BLOOD ALCOHOL INCREASED                       | 10060013 | 8 |
| RIGHT VENTRICULAR SYSTOLIC PRESSURE INCREASED | 10060236 | 8 |
| TINEA INFECTION                               | 10060889 | 8 |
| ANALGESIC DRUG LEVEL THERAPEUTIC              | 10060943 | 8 |
| BILIARY TRACT DISORDER                        | 10061008 | 8 |
| COOMBS TEST POSITIVE                          | 10061090 | 8 |
| LIGAMENT DISORDER                             | 10061222 | 8 |
| LIGAMENT INJURY                               | 10061223 | 8 |
| PROTEUS INFECTION                             | 10061470 | 8 |
| SCAN MYOCARDIAL PERFUSION NORMAL              | 10061514 | 8 |
| MITRAL VALVE DISEASE                          | 10061532 | 8 |
| CARDIAC FIBRILLATION                          | 10061592 | 8 |
| ABDOMEN SCAN NORMAL                           | 10061937 | 8 |
| FRACTURE TREATMENT                            | 10061959 | 8 |
| GRIMACING                                     | 10061991 | 8 |
| HLA MARKER STUDY                              | 10062006 | 8 |
| RETINAL OPERATION                             | 10062107 | 8 |
| SYPHILIS                                      | 10062120 | 8 |
| VIRAL LOAD                                    | 10062178 | 8 |
| SKIN GRAFT                                    | 10062247 | 8 |
| PARANASAL CYST                                | 10062321 | 8 |

|                                  |          |   |
|----------------------------------|----------|---|
| HEPARIN-INDUCED THROMBOCYTOPENIA | 10062506 | 8 |
| RED BLOOD CELL ANALYSIS          | 10062748 | 8 |
| BLOOD ALCOHOL NORMAL             | 10062897 | 8 |
| BRAIN STEM SYNDROME              | 10063292 | 8 |
| BRACHIOCEPHALIC VEIN THROMBOSIS  | 10063363 | 8 |
| FOETAL CHROMOSOME ABNORMALITY    | 10064041 | 8 |
| CSF IMMUNOGLOBULIN INCREASED     | 10064338 | 8 |
| DEVICE DISLOCATION               | 10064684 | 8 |
| MYOCARDIAL OEDEMA                | 10064966 | 8 |
| FACTOR II MUTATION               | 10065003 | 8 |
| THERAPY CESSATION                | 10065154 | 8 |
| POLYCHONDRITIS                   | 10065159 | 8 |
| NIH STROKE SCALE SCORE INCREASED | 10065528 | 8 |
| VACCINATION SITE PUSTULE         | 10066047 | 8 |
| EMERGENCY CARE                   | 10066400 | 8 |
| SARS-COV-2 RNA UNDETECTABLE      | 10085494 | 8 |
| ACUTE MACULAR NEURORETINOPATHY   | 10086444 | 8 |
| ABORTION                         | 10000210 | 7 |
| AGORAPHOBIA                      | 10001502 | 7 |
| AKATHISIA                        | 10001540 | 7 |
| ANTIMITOCHONDRIAL ANTIBODY       | 10002795 | 7 |
| APALLIC SYNDROME                 | 10002941 | 7 |
| ARTERIOVENOUS FISTULA            | 10003226 | 7 |
| ARTHROSCOPY                      | 10003411 | 7 |
| BENIGN NEOPLASM OF THYROID GLAND | 10004412 | 7 |
| BIOPSY VAGINA                    | 10004900 | 7 |
| BLOOD CALCIUM ABNORMAL           | 10005393 | 7 |
| BLOOD ETHANOL                    | 10005513 | 7 |
| BLOOD IMMUNOGLOBULIN M DECREASED | 10005600 | 7 |
| BLOOD SODIUM ABNORMAL            | 10005800 | 7 |
| BLOOD UREA ABNORMAL              | 10005846 | 7 |
| BONE CYST                        | 10005952 | 7 |
| BRADYCARDIA FOETAL               | 10006094 | 7 |
| BREAST CANCER RECURRENT          | 10006198 | 7 |
| BREAST HAEMORRHAGE               | 10006254 | 7 |
| BREAST HYPERPLASIA               | 10006256 | 7 |
| BURN OESOPHAGEAL                 | 10006707 | 7 |
| CARCINOEMBRYONIC ANTIGEN         | 10007262 | 7 |
| CAROTID ARTERY ANEURYSM          | 10007686 | 7 |
| CARPAL TUNNEL DECOMPRESSION      | 10007695 | 7 |
| CERVICAL DISCHARGE               | 10008260 | 7 |
| CERVIX DISORDER                  | 10008351 | 7 |
| CHOLESTASIS                      | 10008635 | 7 |

|                                             |          |   |
|---------------------------------------------|----------|---|
| CLAVICLE FRACTURE                           | 10009245 | 7 |
| COAGULATION FACTOR VIII LEVEL               | 10009766 | 7 |
| COAGULATION TIME PROLONGED                  | 10009799 | 7 |
| COLD TYPE HAEMOLYTIC ANAEMIA                | 10009868 | 7 |
| COLLAGEN DISORDER                           | 10009903 | 7 |
| COLPOSCOPY                                  | 10010069 | 7 |
| CONDUCTIVE DEAFNESS                         | 10010280 | 7 |
| CONJUNCTIVITIS ALLERGIC                     | 10010744 | 7 |
| CONJUNCTIVITIS VIRAL                        | 10010755 | 7 |
| COOMBS DIRECT TEST POSITIVE                 | 10010933 | 7 |
| CREUTZFELDT-JAKOB DISEASE                   | 10011384 | 7 |
| DEPRESSION SUICIDAL                         | 10012397 | 7 |
| DIFFUSE LARGE B-CELL LYMPHOMA               | 10012818 | 7 |
| DROP ATTACKS                                | 10013643 | 7 |
| DUODENAL ULCER                              | 10013836 | 7 |
| DYSMETRIA                                   | 10013936 | 7 |
| ECZEMA EYELIDS                              | 10014194 | 7 |
| ELECTRONYSTAGMOGRAM ABNORMAL                | 10014450 | 7 |
| EMPYEMA                                     | 10014568 | 7 |
| EPIGLOTTITIS                                | 10015030 | 7 |
| EXERCISE LACK OF                            | 10015650 | 7 |
| FACE AND MOUTH X-RAY NORMAL                 | 10016020 | 7 |
| FUNDOSCOPY                                  | 10017519 | 7 |
| GLIOSIS                                     | 10018341 | 7 |
| GRANULOCYTES ABNORMAL                       | 10018685 | 7 |
| HEPATIC NEOPLASM                            | 10019695 | 7 |
| HEPATITIS B ANTIBODY                        | 10019732 | 7 |
| HEPATITIS B ANTIBODY NEGATIVE               | 10019734 | 7 |
| HORMONE REPLACEMENT THERAPY                 | 10020388 | 7 |
| HYDROURETER                                 | 10020533 | 7 |
| HYPERCHOLESTEROLAEMIA                       | 10020603 | 7 |
| HYPEROSMOLAR STATE                          | 10020697 | 7 |
| HYPERTROPHIC CARDIOMYOPATHY                 | 10020871 | 7 |
| HYPOCOMPLEMENTAEMIA                         | 10020974 | 7 |
| HYPOMANIA                                   | 10021030 | 7 |
| INFLAMMATION SCAN                           | 10021966 | 7 |
| INJECTION SITE ATROPHY                      | 10022048 | 7 |
| INJECTION SITE DERMATITIS                   | 10022056 | 7 |
| INTERNATIONAL NORMALISED RATIO ABNORMAL     | 10022592 | 7 |
| LIVER TRANSPLANT                            | 10024714 | 7 |
| MENINGISM                                   | 10027197 | 7 |
| METASTASES TO LUNG                          | 10027458 | 7 |
| MONOCLONAL ANTIBODY IMMUNOCONJUGATE THERAPY | 10027859 | 7 |

|                                     |          |   |
|-------------------------------------|----------|---|
| MONOCYTOSIS                         | 10027906 | 7 |
| MUMPS                               | 10028257 | 7 |
| MUTISM                              | 10028403 | 7 |
| NASAL ULCER                         | 10028780 | 7 |
| NEUROLOGIC NEGLECT SYNDROME         | 10029289 | 7 |
| NODAL RHYTHM                        | 10029470 | 7 |
| OEDEMA MUCOSAL                      | 10030111 | 7 |
| OPISTHOTONUS                        | 10030899 | 7 |
| OVARIAN FAILURE                     | 10033165 | 7 |
| PALINDROMIC RHEUMATISM              | 10033534 | 7 |
| PEAK EXPIRATORY FLOW RATE           | 10034192 | 7 |
| PEAK EXPIRATORY FLOW RATE DECREASED | 10034195 | 7 |
| PICA                                | 10035001 | 7 |
| PORTAL HYPERTENSION                 | 10036200 | 7 |
| PRIMIGRAVIDA                        | 10036757 | 7 |
| PSEUDOLYMPHOMA                      | 10037127 | 7 |
| PULMONARY SARCOIDOSIS               | 10037430 | 7 |
| PULPITIS DENTAL                     | 10037464 | 7 |
| RENAL SCAN                          | 10038520 | 7 |
| RETINAL VASCULITIS                  | 10038905 | 7 |
| RUBELLA ANTIBODY TEST               | 10039259 | 7 |
| SCHIZOPHRENIA                       | 10039626 | 7 |
| SMOOTH MUSCLE ANTIBODY POSITIVE     | 10041229 | 7 |
| SPLENIC ARTERY ANEURYSM             | 10041645 | 7 |
| STRESS FRACTURE                     | 10042212 | 7 |
| SWEATING FEVER                      | 10042666 | 7 |
| TOE AMPUTATION                      | 10043913 | 7 |
| TOOTH DISCOLOURATION                | 10044032 | 7 |
| TOTAL LUNG CAPACITY                 | 10044097 | 7 |
| TRANSFERRIN                         | 10044354 | 7 |
| VISUAL ACUITY TESTS NORMAL          | 10047537 | 7 |
| VITAMIN C                           | 10047620 | 7 |
| VULVAL ABSCESS                      | 10047732 | 7 |
| UMBILICAL CORD ABNORMALITY          | 10048596 | 7 |
| ANKLE OPERATION                     | 10049012 | 7 |
| LABILE HYPERTENSION                 | 10049079 | 7 |
| RECTAL DISCHARGE                    | 10049101 | 7 |
| PIRIFORMIS SYNDROME                 | 10049433 | 7 |
| BRAIN STEM AUDITORY EVOKED RESPONSE | 10049507 | 7 |
| PRECANCEROUS CELLS PRESENT          | 10049673 | 7 |
| GALLBLADDER POLYP                   | 10049704 | 7 |
| BLOOD HOMOCYSTEINE INCREASED        | 10049733 | 7 |
| APPENDICEAL ABSCESS                 | 10049764 | 7 |

|                                                    |          |   |
|----------------------------------------------------|----------|---|
| ROTATOR CUFF REPAIR                                | 10050324 | 7 |
| AORTIC VALVE CALCIFICATION                         | 10050559 | 7 |
| LEFT VENTRICULAR ENLARGEMENT                       | 10050581 | 7 |
| TRANSIENT ACANTHOLYTIC DERMATOSIS                  | 10051446 | 7 |
| VASCULAR CALCIFICATION                             | 10051753 | 7 |
| INFUSION RELATED REACTION                          | 10051792 | 7 |
| BETA HAEMOLYTIC STREPTOCOCCAL INFECTION            | 10052100 | 7 |
| GASTROINTESTINAL HYPOMOTILITY                      | 10052105 | 7 |
| FLUORESCENT IN SITU HYBRIDISATION                  | 10066931 | 7 |
| CYTOGENETIC ABNORMALITY                            | 10067477 | 7 |
| PHARYNGEAL ABSCESS                                 | 10067781 | 7 |
| PLEURAL FLUID ANALYSIS                             | 10068055 | 7 |
| VENOUS OXYGEN SATURATION DECREASED                 | 10068427 | 7 |
| CAPSULAR CONTRACTURE ASSOCIATED WITH BREAST IMPLAN | 10068514 | 7 |
| DRAIN REMOVAL                                      | 10068616 | 7 |
| INJECTION SITE EXFOLIATION                         | 10068689 | 7 |
| LYSOZYME                                           | 10068708 | 7 |
| INCORRECT DOSE ADMINISTERED BY DEVICE              | 10068945 | 7 |
| VACCINATION SITE EXFOLIATION                       | 10069489 | 7 |
| EXPOSURE TO VACCINATED PERSON                      | 10069603 | 7 |
| BILE ACID MALABSORPTION                            | 10069703 | 7 |
| CHLAMYDIA TEST POSITIVE                            | 10070159 | 7 |
| VIRAL TITRE INCREASED                              | 10070256 | 7 |
| TYPHUS RICKETTSIA TEST                             | 10070404 | 7 |
| FALSE POSITIVE INVESTIGATION RESULT                | 10070748 | 7 |
| FOETAL MONITORING NORMAL                           | 10071506 | 7 |
| TILT TABLE TEST NORMAL                             | 10072466 | 7 |
| MICROVASCULAR CORONARY ARTERY DISEASE              | 10072685 | 7 |
| BURSAL FLUID ACCUMULATION                          | 10072833 | 7 |
| PERINEAL INJURY                                    | 10073329 | 7 |
| GENITAL HERPES SIMPLEX                             | 10073931 | 7 |
| OPHTHALMIC HERPES SIMPLEX                          | 10073938 | 7 |
| DIAPHRAGMATIC SPASM                                | 10074312 | 7 |
| HYSTEROSCOPY ABNORMAL                              | 10074341 | 7 |
| POOR FEEDING INFANT                                | 10075316 | 7 |
| RIGHT VENTRICULAR EJECTION FRACTION DECREASED      | 10075337 | 7 |
| HEARING AID THERAPY                                | 10075385 | 7 |
| EYE SYMPTOM                                        | 10075536 | 7 |
| GENITOURINARY SYMPTOM                              | 10075537 | 7 |
| AORTIC VALVE THICKENING                            | 10075851 | 7 |
| VACCINATION SITE JOINT SWELLING                    | 10076178 | 7 |
| PRODUCT USE IN UNAPPROVED INDICATION               | 10076476 | 7 |
| BREATH SOUNDS NORMAL                               | 10076579 | 7 |

|                                            |          |   |
|--------------------------------------------|----------|---|
| PERFORATION                                | 10076705 | 7 |
| LUNG HYPOINFLATION                         | 10076905 | 7 |
| INFECTED BITE                              | 10076911 | 7 |
| DEVICE USE ISSUE                           | 10077812 | 7 |
| VENOUS ANGIOPLASTY                         | 10077826 | 7 |
| INSURANCE ISSUE                            | 10078156 | 7 |
| SYSTEMIC SCLERODERMA                       | 10078638 | 7 |
| VENTRICULAR ENLARGEMENT                    | 10079339 | 7 |
| PERFUSION BRAIN SCAN ABNORMAL              | 10079703 | 7 |
| CONTINUOUS GLUCOSE MONITORING              | 10079764 | 7 |
| EYE HAEMATOMA                              | 10079891 | 7 |
| ULTRASOUND PANCREAS                        | 10080632 | 7 |
| SKIN LESION INFLAMMATION                   | 10081154 | 7 |
| STIFF TONGUE                               | 10081491 | 7 |
| SPINAL RETROLISTHESIS                      | 10081602 | 7 |
| HEART RATE VARIABILITY TEST                | 10082112 | 7 |
| ANTI-RNA POLYMERASE III ANTIBODY           | 10082281 | 7 |
| INVESTIGATION NORMAL                       | 10082416 | 7 |
| REFUSAL OF VACCINATION                     | 10082811 | 7 |
| PERIORBITAL DISCOMFORT                     | 10082879 | 7 |
| EYE INFARCTION                             | 10083006 | 7 |
| RESTLESS ARM SYNDROME                      | 10083534 | 7 |
| PRECANCEROUS CONDITION                     | 10083553 | 7 |
| ANAL RASH                                  | 10084123 | 7 |
| BLOOD DONATION                             | 10084199 | 7 |
| BILIARY OBSTRUCTION                        | 10084247 | 7 |
| DISCOURAGEMENT                             | 10084257 | 7 |
| COVID-19 TREATMENT                         | 10084460 | 7 |
| TRANSVERSE SINUS STENOSIS                  | 10084532 | 7 |
| PATIENT ELOPEMENT                          | 10084569 | 7 |
| TELEMEDICINE                               | 10084643 | 7 |
| CIRCUMORAL OEDEMA                          | 10052250 | 7 |
| MIGRAINE WITHOUT AURA                      | 10052787 | 7 |
| INGROWN HAIR                               | 10052899 | 7 |
| OESOPHAGRAM                                | 10053059 | 7 |
| MICROBIOLOGY TEST                          | 10053075 | 7 |
| NON-ALCOHOLIC STEATOHEPATITIS              | 10053219 | 7 |
| INSULIN-REQUIRING TYPE 2 DIABETES MELLITUS | 10053247 | 7 |
| EXPOSURE TO TOXIC AGENT                    | 10053487 | 7 |
| NEURODEGENERATIVE DISORDER                 | 10053643 | 7 |
| CARDIOVASCULAR AUTONOMIC FUNCTION TEST     | 10053689 | 7 |
| HISTONE ANTIBODY POSITIVE                  | 10053833 | 7 |
| VITAMIN SUPPLEMENTATION                    | 10054128 | 7 |



|                                        |          |   |
|----------------------------------------|----------|---|
| CARDIAC INFECTION                      | 10054212 | 7 |
| FIBROMUSCULAR DYSPLASIA                | 10054794 | 7 |
| VERTEBRAL OSTEOPHYTE                   | 10055042 | 7 |
| COLON CANCER METASTATIC                | 10055114 | 7 |
| BURSA INJURY                           | 10057602 | 7 |
| ULTRASOUND BILIARY TRACT NORMAL        | 10057850 | 7 |
| EAR TUBE INSERTION                     | 10057900 | 7 |
| SUBACUTE CUTANEOUS LUPUS ERYTHEMATOSUS | 10057903 | 7 |
| INFECTED CYST                          | 10058015 | 7 |
| AORTIC OCCLUSION                       | 10058178 | 7 |
| PULMONARY HILUM MASS                   | 10058563 | 7 |
| VITAMIN E                              | 10058765 | 7 |
| MYCOBACTERIUM AVIUM COMPLEX INFECTION  | 10058806 | 7 |
| INTESTINAL MASS                        | 10059017 | 7 |
| HAEMORRHAGIC CYST                      | 10059189 | 7 |
| BAND NEUTROPHIL COUNT                  | 10059477 | 7 |
| SALIVA ANALYSIS                        | 10059532 | 7 |
| BLOOD ALKALINE PHOSPHATASE DECREASED   | 10059569 | 7 |
| RETINOGRAM ABNORMAL                    | 10059663 | 7 |
| ANTI-GAD ANTIBODY POSITIVE             | 10059728 | 7 |
| ADHESION                               | 10059837 | 7 |
| ALPHA TUMOUR NECROSIS FACTOR           | 10059981 | 7 |
| HAEMATOMA EVACUATION                   | 10060733 | 7 |
| ISCHAEMIC CEREBRAL INFARCTION          | 10060840 | 7 |
| SINUSITIS BACTERIAL                    | 10060841 | 7 |
| MONOCLONAL GAMMOPATHY                  | 10060880 | 7 |
| ARTERIAL DISORDER                      | 10060963 | 7 |
| ARTHRITIS INFECTIVE                    | 10060968 | 7 |
| FOOT OPERATION                         | 10061160 | 7 |
| IMMUNOLOGY TEST ABNORMAL               | 10061214 | 7 |
| GASTROINTESTINAL ULCER                 | 10061459 | 7 |
| LACRIMAL DISORDER                      | 10061525 | 7 |
| ABDOMINAL OPERATION                    | 10061609 | 7 |
| CHRONIC RESPIRATORY DISEASE            | 10061768 | 7 |
| CSF VIRUS NO ORGANISMS OBSERVED        | 10061801 | 7 |
| PANCREATIC ENZYMES                     | 10061898 | 7 |
| MONONEUROPATHY                         | 10062203 | 7 |
| SOCIAL PROBLEM                         | 10062254 | 7 |
| JOINT HYPEREXTENSION                   | 10062310 | 7 |
| BRAIN STEM THROMBOSIS                  | 10062573 | 7 |
| CYCLIC VOMITING SYNDROME               | 10062937 | 7 |
| BRONCHOALVEOLAR LAVAGE ABNORMAL        | 10063078 | 7 |
| OPIATES NEGATIVE                       | 10063225 | 7 |

|                                             |          |   |
|---------------------------------------------|----------|---|
| INTERLEUKIN LEVEL INCREASED                 | 10063322 | 7 |
| TRYPTASE INCREASED                          | 10063342 | 7 |
| AMNIOTIC FLUID VOLUME DECREASED             | 10063356 | 7 |
| SINGLE FUNCTIONAL KIDNEY                    | 10063530 | 7 |
| AUTISM SPECTRUM DISORDER                    | 10063844 | 7 |
| FALLOPIAN TUBE OPERATION                    | 10064510 | 7 |
| HUMAN PAPILOMA VIRUS TEST NEGATIVE          | 10064543 | 7 |
| BREATH SOUNDS                               | 10064779 | 7 |
| PANCREATIC DUCT DILATATION                  | 10064858 | 7 |
| EX-TOBACCO USER                             | 10065386 | 7 |
| NEUROPSYCHOLOGICAL TEST                     | 10065432 | 7 |
| GASTROINTESTINAL STOMA COMPLICATION         | 10065718 | 7 |
| SOFT TISSUE NECROSIS                        | 10065769 | 7 |
| THERAPY INTERRUPTED                         | 10066377 | 7 |
| LATENT AUTOIMMUNE DIABETES IN ADULTS        | 10066389 | 7 |
| SCAR INFLAMMATION                           | 10085373 | 7 |
| CYTOKINE INCREASED                          | 10085573 | 7 |
| THROMBOSIS WITH THROMBOCYTOPENIA SYNDROME   | 10086158 | 7 |
| MYOCARDIAL STRAIN IMAGING ABNORMAL          | 10086295 | 7 |
| NEISSERIA TEST NEGATIVE                     | 10086416 | 7 |
| BREAKTHROUGH COVID-19                       | 10086861 | 7 |
| ABNORMAL MENSTRUAL CLOTS                    | 10087591 | 7 |
| ABDOMINAL ADHESIONS                         | 10000050 | 6 |
| ADDISON'S DISEASE                           | 10001130 | 6 |
| ADRENAL HAEMORRHAGE                         | 10001361 | 6 |
| ALBUMIN GLOBULIN RATIO INCREASED            | 10001567 | 6 |
| ALCOHOL ABUSE                               | 10001584 | 6 |
| ALCOHOL POISONING                           | 10001605 | 6 |
| AMAUROSIS FUGAX                             | 10001903 | 6 |
| ANAEMIA OF CHRONIC DISEASE                  | 10002073 | 6 |
| ANISOCORIA                                  | 10002535 | 6 |
| ANTIMICROBIAL SUSCEPTIBILITY TEST SENSITIVE | 10002794 | 6 |
| APPLICATION SITE ERYTHEMA                   | 10003041 | 6 |
| BIOPSY BONE ABNORMAL                        | 10004736 | 6 |
| BIOPSY PERIPHERAL NERVE                     | 10004845 | 6 |
| BLADDER CANCER                              | 10005003 | 6 |
| BLOOD CHOLESTEROL ABNORMAL                  | 10005423 | 6 |
| BLOOD ETHANOL INCREASED                     | 10005515 | 6 |
| BLOOD MAGNESIUM ABNORMAL                    | 10005652 | 6 |
| BLOOD TESTOSTERONE DECREASED                | 10005814 | 6 |
| BLOOD ZINC NORMAL                           | 10005869 | 6 |
| BONE CANCER                                 | 10005949 | 6 |
| BRAIN COMPRESSION                           | 10006112 | 6 |

|                                              |          |   |
|----------------------------------------------|----------|---|
| BRAIN HYPOXIA                                | 10006127 | 6 |
| BREAST ATROPHY                               | 10006179 | 6 |
| BREAST RECONSTRUCTION                        | 10006305 | 6 |
| CAPILLARY LEAK SYNDROME                      | 10007196 | 6 |
| CAROTID ENDARTERECTOMY                       | 10007692 | 6 |
| CAUDA EQUINA SYNDROME                        | 10007821 | 6 |
| CD4 LYMPHOCYTES                              | 10007838 | 6 |
| CD4/CD8 RATIO                                | 10007842 | 6 |
| CHLOASMA                                     | 10008570 | 6 |
| CHOLANGIOGRAM                                | 10008598 | 6 |
| CHORIORETINITIS                              | 10008769 | 6 |
| COAGULATION FACTOR V LEVEL NORMAL            | 10009758 | 6 |
| COCCIDIOIDOMYCOSIS                           | 10009825 | 6 |
| COLOUR BLINDNESS                             | 10010050 | 6 |
| CORNEAL GRAFT REJECTION                      | 10011017 | 6 |
| CREATININE RENAL CLEARANCE INCREASED         | 10011364 | 6 |
| CRYOGLOBULINS                                | 10011476 | 6 |
| CRYOGLOBULINS ABSENT                         | 10011477 | 6 |
| CRYOTHERAPY                                  | 10011483 | 6 |
| CYST DRAINAGE                                | 10011737 | 6 |
| DANDRUFF                                     | 10011859 | 6 |
| DEVICE BREAKAGE                              | 10012575 | 6 |
| DYSPAREUNIA                                  | 10013941 | 6 |
| DYSPHORIA                                    | 10013954 | 6 |
| ECLAMPSIA                                    | 10014129 | 6 |
| EDUCATIONAL PROBLEM                          | 10014270 | 6 |
| ELECTROCARDIOGRAM ST SEGMENT                 | 10014389 | 6 |
| ELECTROCARDIOGRAM ST SEGMENT NORMAL          | 10014393 | 6 |
| ELECTROCARDIOGRAM T WAVE AMPLITUDE DECREASED | 10014394 | 6 |
| ENTEROCOCCAL BACTERAEamia                    | 10014885 | 6 |
| ERYSIPELAS                                   | 10015145 | 6 |
| EYE INFECTION VIRAL                          | 10015940 | 6 |
| FIBRIN D DIMER DECREASED                     | 10016579 | 6 |
| FISTULA                                      | 10016717 | 6 |
| FROSTBITE                                    | 10017382 | 6 |
| GALACTORRHOEA                                | 10017600 | 6 |
| GASTROENTERITIS ESCHERICHIA COLI             | 10017903 | 6 |
| HAEMARTHROSIS                                | 10018829 | 6 |
| HAEMOGLOBIN URINE PRESENT                    | 10018909 | 6 |
| HAPTOGLOBIN INCREASED                        | 10019152 | 6 |
| HEAD BANGING                                 | 10019191 | 6 |
| HEART DISEASE CONGENITAL                     | 10019273 | 6 |
| HOMELESS                                     | 10020361 | 6 |

|                                             |          |   |
|---------------------------------------------|----------|---|
| HORNER'S SYNDROME                           | 10020392 | 6 |
| HYPEREMESIS GRAVIDARUM                      | 10020614 | 6 |
| HYPERMOBILITY SYNDROME                      | 10020677 | 6 |
| HYPOGAMMAGLOBULINAEMIA                      | 10020983 | 6 |
| HYPOVENTILATION                             | 10021133 | 6 |
| ILLITERACY                                  | 10021401 | 6 |
| INFECTION PARASITIC                         | 10021857 | 6 |
| INFLAMMATORY CARCINOMA OF THE BREAST        | 10021980 | 6 |
| INTENTION TREMOR                            | 10022520 | 6 |
| INTERTRIGO                                  | 10022622 | 6 |
| JAW FRACTURE                                | 10023149 | 6 |
| KAWASAKI'S DISEASE                          | 10023320 | 6 |
| KETONURIA                                   | 10023388 | 6 |
| LIBIDO INCREASED                            | 10024421 | 6 |
| LIVER SCAN                                  | 10024707 | 6 |
| LUNG ABSCESS                                | 10025028 | 6 |
| LYMPHOCYTE COUNT ABNORMAL                   | 10025252 | 6 |
| MEAN ARTERIAL PRESSURE                      | 10026982 | 6 |
| MESENTERIC ARTERY THROMBOSIS                | 10027397 | 6 |
| MICROALBUMINURIA                            | 10027525 | 6 |
| MOTOR NEURONE DISEASE                       | 10028003 | 6 |
| MUCOSAL ULCERATION                          | 10028124 | 6 |
| MULTIGRAVIDA                                | 10028160 | 6 |
| NASAL CAVITY PACKING                        | 10028733 | 6 |
| NERVE STIMULATION TEST ABNORMAL             | 10029192 | 6 |
| NEURODERMATITIS                             | 10029263 | 6 |
| NEUROGENIC BLADDER                          | 10029279 | 6 |
| NEUROMA                                     | 10029308 | 6 |
| NIPPLE EXUDATE BLOODY                       | 10029418 | 6 |
| NODAL ARRHYTHMIA                            | 10029458 | 6 |
| OCULAR HYPERTENSION                         | 10030043 | 6 |
| PALMAR-PLANTAR ERYTHRODYSAESTHESIA SYNDROME | 10033553 | 6 |
| PANCREATIC ATROPHY                          | 10033603 | 6 |
| PARONYCHIA                                  | 10034016 | 6 |
| PERICARDITIS CONSTRICTIVE                   | 10034487 | 6 |
| PERIPHERAL NERVE INJURY                     | 10034586 | 6 |
| PHOBIA                                      | 10034912 | 6 |
| POIKILOCYTOSIS                              | 10035774 | 6 |
| POLYCYTHAEMIA VERA                          | 10036057 | 6 |
| POLYMORPHIC LIGHT ERUPTION                  | 10036087 | 6 |
| PROCEDURAL SITE REACTION                    | 10036769 | 6 |
| PROCTITIS ULCERATIVE                        | 10036783 | 6 |
| PROTHROMBIN LEVEL INCREASED                 | 10037051 | 6 |

|                                     |          |   |
|-------------------------------------|----------|---|
| PROTRUSION TONGUE                   | 10037076 | 6 |
| PYELONEPHRITIS ACUTE                | 10037597 | 6 |
| RENAL CANCER                        | 10038389 | 6 |
| RENAL COLIC                         | 10038419 | 6 |
| RENAL HAEMORRHAGE                   | 10038460 | 6 |
| RETAINED PLACENTA OR MEMBRANES      | 10038758 | 6 |
| RETICULOCYTE COUNT NORMAL           | 10038794 | 6 |
| RETINAL FUNCTION TEST ABNORMAL      | 10038866 | 6 |
| RHESUS ANTIBODIES                   | 10039033 | 6 |
| ROCKY MOUNTAIN SPOTTED FEVER        | 10039207 | 6 |
| SCIATIC NERVE INJURY                | 10039670 | 6 |
| SEBORRHOEIC KERATOSIS               | 10039796 | 6 |
| SEROMA                              | 10040102 | 6 |
| SEROTONIN SYNDROME                  | 10040108 | 6 |
| SEXUAL DYSFUNCTION                  | 10040477 | 6 |
| SIGMOIDOSCOPY ABNORMAL              | 10040670 | 6 |
| SKULL X-RAY ABNORMAL                | 10040965 | 6 |
| SPINAL CORD INJURY THORACIC         | 10041558 | 6 |
| SPLENIC HAEMORRHAGE                 | 10041647 | 6 |
| STASIS DERMATITIS                   | 10041955 | 6 |
| STATUS ASTHMATICUS                  | 10041961 | 6 |
| THORACOTOMY                         | 10043491 | 6 |
| THYROID NEOPLASM                    | 10043744 | 6 |
| TRANSFERRIN NORMAL                  | 10044358 | 6 |
| TUBERCULIN TEST NEGATIVE            | 10044727 | 6 |
| ULNA FRACTURE                       | 10045375 | 6 |
| ULTRASOUND EYE ABNORMAL             | 10045417 | 6 |
| URGE INCONTINENCE                   | 10046494 | 6 |
| URINARY BLADDER HAEMORRHAGE         | 10046528 | 6 |
| URTICARIA CHOLINERGIC               | 10046740 | 6 |
| URTICARIA PAPULAR                   | 10046750 | 6 |
| UTERINE HYPERTONUS                  | 10046790 | 6 |
| VAGINAL CYST                        | 10046900 | 6 |
| VERY LOW DENSITY LIPOPROTEIN NORMAL | 10047362 | 6 |
| VESTIBULAR FUNCTION TEST ABNORMAL   | 10047390 | 6 |
| VIOLENCE-RELATED SYMPTOM            | 10047426 | 6 |
| VITAMIN B12 ABSORPTION TEST         | 10047605 | 6 |
| VOLUME BLOOD DECREASED              | 10047689 | 6 |
| VON WILLEBRAND'S DISEASE            | 10047715 | 6 |
| VULVOVAGINAL CANDIDIASIS            | 10047784 | 6 |
| WEIGHT GAIN POOR                    | 10047897 | 6 |
| WISDOM TEETH REMOVAL                | 10047991 | 6 |
| RESTRICTIVE PULMONARY DISEASE       | 10048667 | 6 |

|                                       |          |   |
|---------------------------------------|----------|---|
| SCIATIC NERVE NEUROPATHY              | 10048950 | 6 |
| ARACHNOID CYST                        | 10049005 | 6 |
| HAEMATOCRIT ABNORMAL                  | 10049221 | 6 |
| VOCAL CORD PARESIS                    | 10049234 | 6 |
| NOCTURNAL DYSPNOEA                    | 10049235 | 6 |
| RIGHT VENTRICULAR HYPERTROPHY         | 10050326 | 6 |
| SCLERAL HAEMORRHAGE                   | 10050508 | 6 |
| COLD AGGLUTININS                      | 10050523 | 6 |
| FOETAL HEART RATE DECREASED           | 10051136 | 6 |
| BILE DUCT STENT INSERTION             | 10051773 | 6 |
| LYMPHOID TISSUE HYPERPLASIA           | 10051808 | 6 |
| UVULITIS                              | 10051962 | 6 |
| OVARIAN OPERATION                     | 10052089 | 6 |
| IODINE ALLERGY                        | 10052098 | 6 |
| ESCHERICHIA URINARY TRACT INFECTION   | 10052238 | 6 |
| BETA-2 GLYCOPROTEIN ANTIBODY POSITIVE | 10066404 | 6 |
| STAPHYLOCOCCAL SKIN INFECTION         | 10066409 | 6 |
| OROPHARYNGEAL PLAQUE                  | 10067721 | 6 |
| HLA MARKER STUDY POSITIVE             | 10067937 | 6 |
| INTELLECTUAL DISABILITY               | 10067989 | 6 |
| PARASITIC TEST                        | 10068096 | 6 |
| HYPERDYNAMIC LEFT VENTRICLE           | 10068359 | 6 |
| ANTIVIRAL TREATMENT                   | 10068724 | 6 |
| LUNG CYST                             | 10068749 | 6 |
| RESPIRATORY TRACT INFLAMMATION        | 10068956 | 6 |
| PRENATAL SCREENING TEST ABNORMAL      | 10069151 | 6 |
| ELECTROCAUTERISATION                  | 10069204 | 6 |
| CSF WHITE BLOOD CELL DIFFERENTIAL     | 10069602 | 6 |
| PRODUCT COMPLAINT                     | 10069902 | 6 |
| HAEMOPHILUS TEST POSITIVE             | 10070100 | 6 |
| EXECUTIVE DYSFUNCTION                 | 10070246 | 6 |
| ADENOVIRUS TEST POSITIVE              | 10070369 | 6 |
| TREPONEMA TEST FALSE POSITIVE         | 10070402 | 6 |
| CSF IMMUNOGLOBULIN                    | 10070420 | 6 |
| HEAVY EXPOSURE TO ULTRAVIOLET LIGHT   | 10070687 | 6 |
| RESPIRATORY MUSCLE WEAKNESS           | 10070833 | 6 |
| WALKING DISTANCE TEST NORMAL          | 10071031 | 6 |
| CHEST TUBE REMOVAL                    | 10071381 | 6 |
| EXPOSURE VIA DIRECT CONTACT           | 10071411 | 6 |
| ANTI-MUSCLE SPECIFIC KINASE ANTIBODY  | 10071475 | 6 |
| INFECTIOUS PLEURAL EFFUSION           | 10071699 | 6 |
| MUSCLE OEDEMA                         | 10071759 | 6 |
| AUTOINFLAMMATORY DISEASE              | 10072220 | 6 |

|                                               |          |   |
|-----------------------------------------------|----------|---|
| OESOPHAGEAL MOTILITY DISORDER                 | 10072419 | 6 |
| PERIPHERAL ARTERY BYPASS                      | 10072561 | 6 |
| LID SULCUS DEEPENED                           | 10072716 | 6 |
| REVERSIBLE CEREBRAL VASOCONSTRICTION SYNDROME | 10073240 | 6 |
| ESCHERICHIA TEST NEGATIVE                     | 10073291 | 6 |
| EYE ULCER                                     | 10073423 | 6 |
| INCORRECT DOSAGE ADMINISTERED                 | 10073768 | 6 |
| LARGE INTESTINAL STENOSIS                     | 10074061 | 6 |
| JOINT RANGE OF MOTION MEASUREMENT             | 10075631 | 6 |
| AUTOIMMUNE ENCEPHALOPATHY                     | 10075691 | 6 |
| LISTERIA TEST                                 | 10075707 | 6 |
| INVASIVE BREAST CARCINOMA                     | 10075713 | 6 |
| ADMINISTRATION SITE WARMTH                    | 10075971 | 6 |
| INTERVENTIONAL PROCEDURE                      | 10075978 | 6 |
| FEEDING INTOLERANCE                           | 10076042 | 6 |
| PULMONARY PHYSICAL EXAMINATION                | 10076199 | 6 |
| CHRONIC DISEASE                               | 10076311 | 6 |
| NASAL CRUSTING                                | 10076524 | 6 |
| PRODUCT SUBSTITUTION                          | 10076753 | 6 |
| PROCTECTOMY                                   | 10077252 | 6 |
| MITE ALLERGY                                  | 10077290 | 6 |
| COMPUTERISED TOMOGRAM LIVER ABNORMAL          | 10078360 | 6 |
| NEUROPSYCHIATRIC SYMPTOMS                     | 10078497 | 6 |
| ULTRASOUND PANCREAS NORMAL                    | 10078674 | 6 |
| OROPHARYNGEAL OEDEMA                          | 10078783 | 6 |
| HYPERINTENSITY IN BRAIN DEEP NUCLEI           | 10079392 | 6 |
| HAEMOPHILUS TEST                              | 10080946 | 6 |
| C1 ESTERASE INHIBITOR TEST NORMAL             | 10080954 | 6 |
| PROCEDURAL FAILURE                            | 10081594 | 6 |
| DYSBIOSIS                                     | 10082129 | 6 |
| NASOLARYNGOSCOPY                              | 10082566 | 6 |
| AST/ALT RATIO ABNORMAL                        | 10082832 | 6 |
| EXPOSURE TO FUNGUS                            | 10083061 | 6 |
| TRIPLE POSITIVE BREAST CANCER                 | 10083233 | 6 |
| TRANSCUTANEOUS PACING                         | 10083519 | 6 |
| NON-PITTING OEDEMA                            | 10083903 | 6 |
| TRACHEAL ASPIRATE CULTURE                     | 10084653 | 6 |
| CAFFEINE CONSUMPTION                          | 10052308 | 6 |
| VENTRICULAR ASSIST DEVICE INSERTION           | 10052371 | 6 |
| CATHETER REMOVAL                              | 10052916 | 6 |
| CHOLELITHOTOMY                                | 10052925 | 6 |
| CRANIECTOMY                                   | 10052937 | 6 |
| JOINT DISLOCATION REDUCTION                   | 10052988 | 6 |

|                                                  |          |   |
|--------------------------------------------------|----------|---|
| INTESTINAL ADHESION LYSIS                        | 10052993 | 6 |
| IRON BINDING CAPACITY UNSATURATED                | 10053226 | 6 |
| CARDIAC PACEMAKER EVALUATION                     | 10053441 | 6 |
| ABSCESS JAW                                      | 10053573 | 6 |
| ABSCESS NECK                                     | 10053576 | 6 |
| EXTRAOCULAR MUSCLE DISORDER                      | 10053635 | 6 |
| THERAPEUTIC PROCEDURE                            | 10053757 | 6 |
| ALLERGIC COUGH                                   | 10053779 | 6 |
| CSF MONOCYTE COUNT DECREASED                     | 10053800 | 6 |
| EVANS SYNDROME                                   | 10053873 | 6 |
| DACRYOSTENOSIS ACQUIRED                          | 10053990 | 6 |
| LIPOPROTEIN (A)                                  | 10054020 | 6 |
| PERIPHERAL PARALYSIS                             | 10054808 | 6 |
| SPLENIC LESION                                   | 10054829 | 6 |
| ALLERGY TO PLANTS                                | 10054928 | 6 |
| BRAIN CANCER METASTATIC                          | 10055093 | 6 |
| OLFACTORY NERVE DISORDER                         | 10056388 | 6 |
| STAPHYLOCOCCAL SEPSIS                            | 10056430 | 6 |
| DENTAL EXAMINATION ABNORMAL                      | 10056828 | 6 |
| PALPABLE PURPURA                                 | 10056872 | 6 |
| INTESTINAL ANASTOMOSIS                           | 10057146 | 6 |
| BLOOD METHAEMOGLOBIN                             | 10057157 | 6 |
| OESOPHAGEAL DILATION PROCEDURE                   | 10057305 | 6 |
| EAR INJURY                                       | 10057446 | 6 |
| ANGIOGRAM PERIPHERAL ABNORMAL                    | 10057517 | 6 |
| ULTRASOUND BILIARY TRACT ABNORMAL                | 10057851 | 6 |
| CYSTOID MACULAR OEDEMA                           | 10058202 | 6 |
| BIOPSY INTESTINE ABNORMAL                        | 10058371 | 6 |
| BIOPSY UTERUS ABNORMAL                           | 10058376 | 6 |
| SPINAL CORD INFARCTION                           | 10058571 | 6 |
| PSEUDOMONAL BACTERAEMIA                          | 10058923 | 6 |
| LABOUR PAIN                                      | 10059204 | 6 |
| EXTREMITY NECROSIS                               | 10059385 | 6 |
| THERAPEUTIC HYPOTHERMIA                          | 10059485 | 6 |
| ABDOMINAL CAVITY DRAINAGE                        | 10059486 | 6 |
| HAEMORRHOID OPERATION                            | 10059624 | 6 |
| X-RAY WITH CONTRAST LOWER GASTROINTESTINAL TRACT | 10059691 | 6 |
| B-LYMPHOCYTE COUNT                               | 10059966 | 6 |
| URINE AMPHETAMINE NEGATIVE                       | 10059986 | 6 |
| RHEUMATOID FACTOR QUANTITATIVE                   | 10060198 | 6 |
| PLATELET MORPHOLOGY NORMAL                       | 10060221 | 6 |
| TYPE V HYPERLIPIDAEMIA                           | 10060755 | 6 |
| JOINT STABILISATION                              | 10060788 | 6 |



|                                                 |          |   |
|-------------------------------------------------|----------|---|
| EMBOLIC CEREBRAL INFARCTION                     | 10060839 | 6 |
| BENIGN LYMPH NODE NEOPLASM                      | 10060997 | 6 |
| BINOCULAR EYE MOVEMENT DISORDER                 | 10061010 | 6 |
| CARDIOACTIVE DRUG LEVEL                         | 10061028 | 6 |
| THYROGLOBULIN                                   | 10061136 | 6 |
| NEUTROPHIL COUNT ABNORMAL                       | 10061313 | 6 |
| OPTIC NEUROPATHY                                | 10061323 | 6 |
| SKELETAL INJURY                                 | 10061363 | 6 |
| COLORECTAL CANCER                               | 10061451 | 6 |
| SALIVARY GLAND NEOPLASM                         | 10061497 | 6 |
| SCLERAL DISORDER                                | 10061510 | 6 |
| X-RAY GASTROINTESTINAL TRACT ABNORMAL           | 10061582 | 6 |
| X-RAY GASTROINTESTINAL TRACT NORMAL             | 10061584 | 6 |
| BLAST CELLS                                     | 10061700 | 6 |
| BRONCHITIS BACTERIAL                            | 10061736 | 6 |
| COLON OPERATION                                 | 10061779 | 6 |
| CONJUNCTIVITIS BACTERIAL                        | 10061784 | 6 |
| EAR INFECTION VIRAL                             | 10061830 | 6 |
| RETINAL VASCULAR THROMBOSIS                     | 10062108 | 6 |
| VITAMIN D INCREASED                             | 10062134 | 6 |
| VITAMIN B12 ABNORMAL                            | 10062187 | 6 |
| SPINAL CORD NEOPLASM                            | 10062261 | 6 |
| NAIL RIDGING                                    | 10062283 | 6 |
| HERPES DERMATITIS                               | 10062639 | 6 |
| HAEMORRHAGIC DIATHESIS                          | 10062713 | 6 |
| MESENTERIC PANNICULITIS                         | 10063031 | 6 |
| SPINAL CORD OEDEMA                              | 10063036 | 6 |
| HEPATITIS B SURFACE ANTIBODY                    | 10063051 | 6 |
| FAECAL DISIMPACTION                             | 10063056 | 6 |
| BARBITURATES NEGATIVE                           | 10063224 | 6 |
| HISTAMINE ABNORMAL                              | 10063302 | 6 |
| BLADDER HYPERTROPHY                             | 10063408 | 6 |
| HYPERGLYCAEMIC HYPEROSMOLAR NONKETOTIC SYNDROME | 10063554 | 6 |
| EXCESSIVE GRANULATION TISSUE                    | 10063560 | 6 |
| VERTEBROPLASTY                                  | 10063565 | 6 |
| EXPOSURE TO EXTREME TEMPERATURE                 | 10063601 | 6 |
| BIOCHEMICAL PREGNANCY                           | 10063639 | 6 |
| BLOOD PRESSURE MANAGEMENT                       | 10063926 | 6 |
| VASOPRESSIVE THERAPY                            | 10064148 | 6 |
| CELL MARKER                                     | 10064496 | 6 |
| ILIAC ARTERY OCCLUSION                          | 10064601 | 6 |
| NAIL GROWTH ABNORMAL                            | 10064764 | 6 |
| LIGAMENTITIS                                    | 10064804 | 6 |

|                                       |          |   |
|---------------------------------------|----------|---|
| CANCER IN REMISSION                   | 10065305 | 6 |
| BONE MARROW FAILURE                   | 10065553 | 6 |
| TRACHEAL INFLAMMATION                 | 10065899 | 6 |
| CARDIOVASCULAR INSUFFICIENCY          | 10065929 | 6 |
| ULTRASOUND HEAD                       | 10085915 | 6 |
| BRIEF RESOLVED UNEXPLAINED EVENT      | 10086181 | 6 |
| SICK LEAVE                            | 10086390 | 6 |
| ANGIOTENSIN CONVERTING ENZYME NORMAL  | 10087039 | 6 |
| ABSCESS INTESTINAL                    | 10000285 | 5 |
| ACOUSTIC NEUROMA                      | 10000523 | 5 |
| ACROCHORDON                           | 10000591 | 5 |
| ADENOMA BENIGN                        | 10001233 | 5 |
| ALBUMIN URINE ABSENT                  | 10001581 | 5 |
| ALBUMIN URINE PRESENT                 | 10001582 | 5 |
| ALCOHOLISM                            | 10001639 | 5 |
| ALPHA 1 FOETOPROTEIN NORMAL           | 10001782 | 5 |
| ANHEDONIA                             | 10002511 | 5 |
| AORTITIS                              | 10002921 | 5 |
| ARRHYTHMIA SUPRAVENTRICULAR           | 10003130 | 5 |
| ARTERIOVENOUS MALFORMATION            | 10003193 | 5 |
| ASPIRATION BONE MARROW                | 10003505 | 5 |
| BIOPSY BONE                           | 10004735 | 5 |
| BIOPSY STOMACH                        | 10004879 | 5 |
| BIOPSY STOMACH NORMAL                 | 10004881 | 5 |
| BIOPSY VULVA ABNORMAL                 | 10004904 | 5 |
| BLOOD BILIRUBIN UNCONJUGATED          | 10005369 | 5 |
| BLOOD CATECHOLAMINES NORMAL           | 10005415 | 5 |
| BLOOD CREATINE PHOSPHOKINASE ABNORMAL | 10005468 | 5 |
| BLOOD CREATININE ABNORMAL             | 10005481 | 5 |
| BLOOD DONOR                           | 10005494 | 5 |
| BLOOD FOLATE DECREASED                | 10005527 | 5 |
| BLOOD INSULIN                         | 10005605 | 5 |
| BLOOD LACTIC ACID ABNORMAL            | 10005633 | 5 |
| BRACHIAL PLEXUS INJURY                | 10006074 | 5 |
| BREAST CANCER STAGE II                | 10006200 | 5 |
| BREAST CANCER STAGE III               | 10006201 | 5 |
| CARDIAC OUTPUT                        | 10007594 | 5 |
| CARDIAC SARCOIDOSIS                   | 10007604 | 5 |
| CAVERNOUS SINUS THROMBOSIS            | 10007830 | 5 |
| CD8 LYMPHOCYTES                       | 10007845 | 5 |
| CERVICAL CYST                         | 10008254 | 5 |
| CERVICAL POLYP                        | 10008297 | 5 |
| CHOLANGIOCARCINOMA                    | 10008593 | 5 |

|                                      |          |   |
|--------------------------------------|----------|---|
| CHROMOSOMAL ANALYSIS                 | 10008811 | 5 |
| CHRONIC MYELOMONOCYTIC LEUKAEMIA     | 10009018 | 5 |
| CORNEAL OPACITY                      | 10011035 | 5 |
| CULTURE TISSUE SPECIMEN              | 10011635 | 5 |
| CYSTOGRAM                            | 10011804 | 5 |
| DERMATITIS EXFOLIATIVE GENERALISED   | 10012456 | 5 |
| DEVICE EXPULSION                     | 10012578 | 5 |
| DEVICE LEAKAGE                       | 10012587 | 5 |
| DYSPRAXIA                            | 10013976 | 5 |
| ELECTROCARDIOGRAM QRS COMPLEX NORMAL | 10014379 | 5 |
| ELECTROCARDIOGRAM T WAVE PEAKED      | 10014396 | 5 |
| ELECTROCONVULSIVE THERAPY            | 10014404 | 5 |
| ELECTROLYTE DEPLETION                | 10014415 | 5 |
| ELECTRONYSTAGMOGRAM NORMAL           | 10014451 | 5 |
| ELLIPTOCYTOSIS                       | 10014489 | 5 |
| ENCEPHALITIS VIRAL                   | 10014612 | 5 |
| ENCEPHALOMYELITIS                    | 10014619 | 5 |
| ENDARTERECTOMY                       | 10014648 | 5 |
| ENTEROVIRUS INFECTION                | 10014909 | 5 |
| ENTHESOPATHY                         | 10014910 | 5 |
| ERYTHEMA INDURATUM                   | 10015213 | 5 |
| ERYTHROPSIA                          | 10015290 | 5 |
| ESCHERICHIA SEPSIS                   | 10015296 | 5 |
| EXTERNAL FIXATION OF FRACTURE        | 10015741 | 5 |
| EXTRAPYRAMIDAL DISORDER              | 10015832 | 5 |
| EXTRAVASATION                        | 10015866 | 5 |
| FACE AND MOUTH X-RAY ABNORMAL        | 10016019 | 5 |
| FASCIOTOMY                           | 10016237 | 5 |
| FAT TISSUE INCREASED                 | 10016251 | 5 |
| FEMALE ORGASMIC DISORDER             | 10016405 | 5 |
| FIXED ERUPTION                       | 10016741 | 5 |
| FLIGHT OF IDEAS                      | 10016777 | 5 |
| FUNGAEMIA                            | 10017523 | 5 |
| GALLBLADDER OEDEMA                   | 10017637 | 5 |
| GASTRITIS EROSIVE                    | 10017865 | 5 |
| GASTROINTESTINAL NECROSIS            | 10017982 | 5 |
| GINGIVAL RECESSION                   | 10018290 | 5 |
| GLIOBLASTOMA                         | 10018336 | 5 |
| GONORRHOEA                           | 10018612 | 5 |
| HEMIANOPIA                           | 10019452 | 5 |
| HEMIANOPIA HOMONYMOUS                | 10019456 | 5 |
| HEPATITIS A ANTIBODY NEGATIVE        | 10019723 | 5 |
| HEPATOCELLULAR INJURY                | 10019837 | 5 |

|                                       |          |   |
|---------------------------------------|----------|---|
| HEPATOSPLENOMEGALY                    | 10019847 | 5 |
| HIV INFECTION                         | 10020161 | 5 |
| HOSTILITY                             | 10020400 | 5 |
| HYPERAMMONAEMIA                       | 10020575 | 5 |
| HYPERMETABOLISM                       | 10020674 | 5 |
| HYPERPARATHYROIDISM                   | 10020705 | 5 |
| HYPERSENSITIVITY VASCULITIS           | 10020764 | 5 |
| HYPERTENSIVE ENCEPHALOPATHY           | 10020803 | 5 |
| HYSTEROTOMY                           | 10021171 | 5 |
| INJECTION SITE EROSION                | 10022059 | 5 |
| IRIS ADHESIONS                        | 10022945 | 5 |
| IRON BINDING CAPACITY TOTAL INCREASED | 10022965 | 5 |
| LACRIMATION DECREASED                 | 10023642 | 5 |
| LARYNGEAL PAIN                        | 10023848 | 5 |
| LEUKOPLAKIA ORAL                      | 10024396 | 5 |
| LOCKED-IN SYNDROME                    | 10024792 | 5 |
| MASTOCYTOSIS                          | 10026891 | 5 |
| MENINGITIS BACTERIAL                  | 10027202 | 5 |
| MENINGITIS CHEMICAL                   | 10027206 | 5 |
| MITRAL VALVE REPLACEMENT              | 10027732 | 5 |
| MOLE EXCISION                         | 10027805 | 5 |
| MOLLUSCUM CONTAGIOSUM                 | 10027807 | 5 |
| MONOCLONAL IMMUNOGLOBULIN PRESENT     | 10027864 | 5 |
| MYELOSUPPRESSION                      | 10028584 | 5 |
| MYOKYMIA                              | 10028632 | 5 |
| MYOPERICARDITIS                       | 10028650 | 5 |
| NASAL OBSTRUCTION                     | 10028748 | 5 |
| NECROTISING FASCIITIS                 | 10028885 | 5 |
| NERVE STIMULATION TEST NORMAL         | 10029193 | 5 |
| OBSESSIVE THOUGHTS                    | 10029897 | 5 |
| OROPHARYNGEAL SPASM                   | 10031111 | 5 |
| OSTEOMYELITIS ACUTE                   | 10031253 | 5 |
| PARAPSORIASIS                         | 10033898 | 5 |
| PARATRACHEAL LYMPHADENOPATHY          | 10033969 | 5 |
| PELVIC CONGESTION                     | 10034240 | 5 |
| PERITONEAL DIALYSIS                   | 10034660 | 5 |
| PERSONALITY DISORDER                  | 10034721 | 5 |
| PLEURAL FIBROSIS                      | 10035600 | 5 |
| PLEURODESIS                           | 10035625 | 5 |
| POLYARTERITIS NODOSA                  | 10036024 | 5 |
| POST VACCINATION SYNDROME             | 10036242 | 5 |
| PREALBUMIN                            | 10036508 | 5 |
| PRESSURE OF SPEECH                    | 10036649 | 5 |

|                                                       |          |   |
|-------------------------------------------------------|----------|---|
| PROTEIN C DECREASED                                   | 10037005 | 5 |
| PROTEIN TOTAL ABNORMAL                                | 10037012 | 5 |
| PULSE PRESSURE INCREASED                              | 10037482 | 5 |
| PYODERMA GANGRENOSUM                                  | 10037635 | 5 |
| RED BLOOD CELL NUCLEATED MORPHOLOGY PRESENT           | 10038165 | 5 |
| RED BLOOD CELL SCHISTOCYTES PRESENT                   | 10038169 | 5 |
| RENAL ATROPHY                                         | 10038381 | 5 |
| RETINAL ISCHAEMIA                                     | 10038871 | 5 |
| RETINAL VASCULAR OCCLUSION                            | 10038903 | 5 |
| SALPINGO-OOPHORECTOMY BILATERAL                       | 10039465 | 5 |
| SIMPLE PARTIAL SEIZURES                               | 10040703 | 5 |
| SLEEP DISORDER DUE TO GENERAL MEDICAL CONDITION, INSC | 10040986 | 5 |
| SMEAR SITE UNSPECIFIED NORMAL                         | 10041209 | 5 |
| SMEAR VAGINA                                          | 10041214 | 5 |
| SOFT TISSUE INJURY                                    | 10041291 | 5 |
| THROMBOCYTOPENIC PURPURA                              | 10043561 | 5 |
| TRACHEITIS                                            | 10044302 | 5 |
| TUMOUR PAIN                                           | 10045171 | 5 |
| VERTICAL INFECTION TRANSMISSION                       | 10047337 | 5 |
| VIIIITH NERVE INJURY                                  | 10047409 | 5 |
| VIRAL PHARYNGITIS                                     | 10047473 | 5 |
| VITAMIN B6 INCREASED                                  | 10047618 | 5 |
| VITRECTOMY                                            | 10047644 | 5 |
| VITREOUS DEGENERATION                                 | 10047649 | 5 |
| X-RAY THERAPY TO LUNG                                 | 10048202 | 5 |
| XANTHOPSIA                                            | 10048216 | 5 |
| CEREBRAL VENTRICLE DILATATION                         | 10048824 | 5 |
| NAIL BED BLEEDING                                     | 10048891 | 5 |
| ANAL ABSCESS                                          | 10048946 | 5 |
| BASILAR ARTERY OCCLUSION                              | 10048963 | 5 |
| CARBOHYDRATE ANTIGEN 19-9                             | 10049073 | 5 |
| INJECTION SITE JOINT WARMTH                           | 10049262 | 5 |
| BONE DENSITY DECREASED                                | 10049470 | 5 |
| ANTITHROMBIN III DECREASED                            | 10049547 | 5 |
| FEELING GUILTY                                        | 10049708 | 5 |
| URETHRAL HAEMORRHAGE                                  | 10049710 | 5 |
| DYSACUSIS                                             | 10049712 | 5 |
| PEAU D'ORANGE                                         | 10049752 | 5 |
| BLOOD HIV RNA BELOW ASSAY LIMIT                       | 10049829 | 5 |
| DRY GANGRENE                                          | 10049927 | 5 |
| ENDOLYMPHATIC HYDROPS                                 | 10049934 | 5 |
| FAECAL VOLUME INCREASED                               | 10049939 | 5 |
| IDIOSYNCRATIC DRUG REACTION                           | 10049998 | 5 |

|                                       |          |   |
|---------------------------------------|----------|---|
| VULVOVAGINAL ULCERATION               | 10050181 | 5 |
| TONSILLAR ULCER                       | 10050211 | 5 |
| SEROLOGY NEGATIVE                     | 10050410 | 5 |
| SEROLOGY NORMAL                       | 10050411 | 5 |
| INABILITY TO CRAWL                    | 10050740 | 5 |
| FREE THYROXINE INDEX                  | 10050742 | 5 |
| SPECIFIC GRAVITY URINE DECREASED      | 10050772 | 5 |
| ITCHING SCAR                          | 10050818 | 5 |
| TOXOPLASMA SEROLOGY                   | 10050941 | 5 |
| METAMYELOCYTE COUNT                   | 10050965 | 5 |
| COMPLEMENT FACTOR C3 DECREASED        | 10050981 | 5 |
| ORAL SURGERY                          | 10051059 | 5 |
| WRIST SURGERY                         | 10051062 | 5 |
| ELECTROCARDIOGRAM Q WAVE ABNORMAL     | 10051177 | 5 |
| DYSENTERY                             | 10051402 | 5 |
| TOLOSA-HUNT SYNDROME                  | 10051526 | 5 |
| METASTASES TO PERITONEUM              | 10051676 | 5 |
| COSTOVERTEBRAL ANGLE TENDERNESS       | 10051704 | 5 |
| ENTEROBACTER INFECTION                | 10051910 | 5 |
| FOETAL CYSTIC HYGROMA                 | 10052011 | 5 |
| CYTOKINE RELEASE SYNDROME             | 10052015 | 5 |
| GLARE                                 | 10052128 | 5 |
| OESOPHAGEAL RUPTURE                   | 10052211 | 5 |
| EXAGGERATED STARTLE RESPONSE          | 10066482 | 5 |
| STOMACH MASS                          | 10066792 | 5 |
| ENDOSCOPIC ULTRASOUND                 | 10067016 | 5 |
| ELBOW OPERATION                       | 10067100 | 5 |
| CEREBRAL MICROANGIOPATHY              | 10067466 | 5 |
| PERIPHERAL NERVE LESION               | 10067633 | 5 |
| SHORTENED CERVIX                      | 10067726 | 5 |
| FOCAL SEGMENTAL GLOMERULOSCLEROSIS    | 10067757 | 5 |
| UPPER AIRWAY OBSTRUCTION              | 10067775 | 5 |
| ORAL ALLERGY SYNDROME                 | 10068355 | 5 |
| DEVICE INTOLERANCE                    | 10068444 | 5 |
| SPLENIC CALCIFICATION                 | 10068608 | 5 |
| BLOOD BETA-D-GLUCAN                   | 10068725 | 5 |
| BLOOD CHROMOGRANIN A                  | 10068766 | 5 |
| VON WILLEBRAND'S FACTOR ACTIVITY TEST | 10068985 | 5 |
| VON WILLEBRAND'S FACTOR ANTIGEN TEST  | 10068988 | 5 |
| MASTOID EFFUSION                      | 10069008 | 5 |
| GASTROINTESTINAL VIRAL INFECTION      | 10069049 | 5 |
| INTRAMEDULLARY ROD INSERTION          | 10069066 | 5 |
| GROSS MOTOR DELAY                     | 10069118 | 5 |

|                                          |          |   |
|------------------------------------------|----------|---|
| PERIPROSTHETIC FRACTURE                  | 10069135 | 5 |
| SEPTIC ENCEPHALOPATHY                    | 10069141 | 5 |
| EYELID INJURY                            | 10069200 | 5 |
| EYE PATCH APPLICATION                    | 10069647 | 5 |
| SPINAL COLUMN INJURY                     | 10069689 | 5 |
| EYEGASSES THERAPY                        | 10069772 | 5 |
| TREPONEMA TEST POSITIVE                  | 10070158 | 5 |
| BORDETELLA TEST                          | 10070277 | 5 |
| COXSACKIE VIRUS TEST NEGATIVE            | 10070393 | 5 |
| ASPERGILLUS TEST NEGATIVE                | 10070449 | 5 |
| NAIL BED DISORDER                        | 10070533 | 5 |
| ADMINISTRATION SITE RASH                 | 10071156 | 5 |
| VULVOVAGINAL INJURY                      | 10071212 | 5 |
| HEPATITIS B CORE ANTIBODY                | 10071342 | 5 |
| SEIZURE CLUSTER                          | 10071350 | 5 |
| CAPSULE ENDOSCOPY                        | 10071360 | 5 |
| INFECTED DERMAL CYST                     | 10071367 | 5 |
| FOETAL NON-STRESS TEST NORMAL            | 10071517 | 5 |
| VASCULAR ENDOTHELIAL GROWTH FACTOR ASSAY | 10071597 | 5 |
| PERIORBITAL HAEMORRHAGE                  | 10071697 | 5 |
| CEREBRAL CAVERNOUS MALFORMATION          | 10071747 | 5 |
| ENZYME ACTIVITY NORMAL                   | 10072022 | 5 |
| OCULAR ROSACEA                           | 10072139 | 5 |
| COMPUTERISED TOMOGRAM KIDNEY NORMAL      | 10072169 | 5 |
| NECK SURGERY                             | 10072227 | 5 |
| FOETAL PLACENTAL THROMBOSIS              | 10072240 | 5 |
| PERIPHERAL ARTERY STENOSIS               | 10072563 | 5 |
| HAEMANGIOMA OF BONE                      | 10072572 | 5 |
| EYELID THICKENING                        | 10072719 | 5 |
| NON-TOBACCO USER                         | 10072840 | 5 |
| HUMAN METAPNEUMOVIRUS TEST POSITIVE      | 10072859 | 5 |
| HEPATOCELLULAR CARCINOMA                 | 10073071 | 5 |
| INVASIVE LOBULAR BREAST CARCINOMA        | 10073096 | 5 |
| ROMBERG TEST POSITIVE                    | 10073242 | 5 |
| ESCHERICHIA TEST                         | 10073290 | 5 |
| BILIRUBIN CONJUGATED DECREASED           | 10073405 | 5 |
| COXIELLA TEST                            | 10073454 | 5 |
| COLONIC ABSCESS                          | 10073573 | 5 |
| VISUAL PERSEVERATION                     | 10073653 | 5 |
| OBSTRUCTIVE SHOCK                        | 10073708 | 5 |
| MICROEMBOLISM                            | 10073734 | 5 |
| REVERSED HOT-COLD SENSATION              | 10073738 | 5 |
| PNEUMOCYSTIS JIROVECI PNEUMONIA          | 10073755 | 5 |

|                                            |          |   |
|--------------------------------------------|----------|---|
| VASCULAR CATHETERISATION                   | 10074169 | 5 |
| CARDIOPULMONARY EXERCISE TEST              | 10074357 | 5 |
| AIRWAY SECRETION CLEARANCE THERAPY         | 10074363 | 5 |
| FOETAL HEART RATE DECELERATION ABNORMALITY | 10074636 | 5 |
| MONOCLONAL B-CELL LYMPHOCYTOSIS            | 10074668 | 5 |
| ADJUSTED CALCIUM                           | 10074756 | 5 |
| HAIR INJURY                                | 10074924 | 5 |
| ADMINISTRATION SITE SWELLING               | 10075107 | 5 |
| ROOT CANAL INFECTION                       | 10075136 | 5 |
| ANTI-MUELLERIAN HORMONE LEVEL              | 10075156 | 5 |
| NODULAR RASH                               | 10075807 | 5 |
| VACCINATION SITE HYPERAESTHESIA            | 10076165 | 5 |
| VACCINATION SITE NERVE DAMAGE              | 10076184 | 5 |
| OVERGROWTH FUNGAL                          | 10076272 | 5 |
| PRODUCT SELECTION ERROR                    | 10076542 | 5 |
| ACUTE MOTOR-SENSORY AXONAL NEUROPATHY      | 10076657 | 5 |
| DECREASED NASOLABIAL FOLD                  | 10076861 | 5 |
| CYTOKINE ABNORMAL                          | 10077351 | 5 |
| HYPOBARISM                                 | 10077606 | 5 |
| TOTAL COMPLEMENT ACTIVITY INCREASED        | 10077884 | 5 |
| NON-24-HOUR SLEEP-WAKE DISORDER            | 10078086 | 5 |
| THYROID CALCIFICATION                      | 10078379 | 5 |
| AMNIOTIC MEMBRANE RUPTURE TEST POSITIVE    | 10078834 | 5 |
| TRANSIENT LINGUAL PAPILLITIS               | 10079293 | 5 |
| MICROVASCULAR CRANIAL NERVE PALSY          | 10079491 | 5 |
| ORTHOSTATIC HEART RATE TEST                | 10079786 | 5 |
| PALATE INJURY                              | 10079812 | 5 |
| PRODUCT COMMUNICATION ISSUE                | 10080099 | 5 |
| IMAGING PROCEDURE ARTIFACT                 | 10080358 | 5 |
| PORTOGRAM                                  | 10080520 | 5 |
| ANTIGLIADIN ANTIBODY                       | 10080857 | 5 |
| GALLBLADDER HYPOFUNCTION                   | 10080936 | 5 |
| LEPTOSPIRA TEST                            | 10080944 | 5 |
| RED BLOOD CELL SCHISTOCYTES                | 10080983 | 5 |
| DEGENERATIVE BONE DISEASE                  | 10081730 | 5 |
| PRODUCT PRESCRIBING ERROR                  | 10081770 | 5 |
| CENTRAL NERVOUS SYSTEM VASCULITIS          | 10081778 | 5 |
| HYPERSENSITIVITY PNEUMONITIS               | 10081988 | 5 |
| MAGNETIC RESONANCE ELASTOGRAPHY            | 10082070 | 5 |
| AUTOMATIC POSITIVE AIRWAY PRESSURE         | 10082223 | 5 |
| LIP SCAB                                   | 10082767 | 5 |
| PITUITARY SCAN                             | 10082813 | 5 |
| PERIPHERAL VEIN THROMBUS EXTENSION         | 10082853 | 5 |



|                                               |          |   |
|-----------------------------------------------|----------|---|
| COMPUTERISED TOMOGRAM PANCREAS ABNORMAL       | 10082936 | 5 |
| SEPTIC PULMONARY EMBOLISM                     | 10083093 | 5 |
| MAGNETIC RESONANCE IMAGING BREAST NORMAL      | 10083125 | 5 |
| CONGESTIVE HEPATOPATHY                        | 10084058 | 5 |
| IMPERCEPTION                                  | 10084197 | 5 |
| DISSEMINATED VARICELLA ZOSTER VIRUS INFECTION | 10084396 | 5 |
| WRONG ROUTE                                   | 10084398 | 5 |
| FOCAL PERITONITIS                             | 10084697 | 5 |
| OXYGENATION INDEX                             | 10084783 | 5 |
| LEFT ATRIAL APPENDAGE CLOSURE IMPLANT         | 10085044 | 5 |
| MORTON'S NEURALGIA                            | 10052288 | 5 |
| VASCULAR CAUTERISATION                        | 10052679 | 5 |
| URODYNAMICS MEASUREMENT                       | 10052685 | 5 |
| INTRA-AORTIC BALLOON PLACEMENT                | 10052989 | 5 |
| CRYSTAL URINE                                 | 10053114 | 5 |
| THERAPEUTIC RESPONSE DELAYED                  | 10053181 | 5 |
| INGUINAL MASS                                 | 10053217 | 5 |
| INFUSION SITE PAIN                            | 10053483 | 5 |
| TRACHEAL DISORDER                             | 10053490 | 5 |
| URINE PROTEIN/CREATININE RATIO INCREASED      | 10053538 | 5 |
| ELECTROCARDIOGRAM PR PROLONGATION             | 10053657 | 5 |
| CSF MONOCYTE COUNT                            | 10053799 | 5 |
| CSF NEUTROPHIL COUNT INCREASED                | 10053803 | 5 |
| CAROTID PULSE ABNORMAL                        | 10053928 | 5 |
| RADIAL PULSE ABNORMAL                         | 10053937 | 5 |
| CARDIAC PHARMACOLOGIC STRESS TEST             | 10054017 | 5 |
| SKIN CANDIDA                                  | 10054152 | 5 |
| INCREASED VISCOSITY OF BRONCHIAL SECRETION    | 10054761 | 5 |
| BONE TUBERCULOSIS                             | 10056377 | 5 |
| BILIARY DYSKINESIA                            | 10056529 | 5 |
| PERIPHERAL SENSORIMOTOR NEUROPATHY            | 10056673 | 5 |
| INTRA-OCULAR INJECTION                        | 10057098 | 5 |
| BIFASCICULAR BLOCK                            | 10057393 | 5 |
| CARDIAC VENTRICULAR DISORDER                  | 10057455 | 5 |
| NASAL MUCOSAL DISCOLOURATION                  | 10057537 | 5 |
| SPINAL MYELOGRAM                              | 10057563 | 5 |
| VASCULAR DEMENTIA                             | 10057678 | 5 |
| MUSCLE ENZYME                                 | 10057951 | 5 |
| PANEL-REACTIVE ANTIBODY                       | 10058280 | 5 |
| DYSPLASIA                                     | 10058314 | 5 |
| BLOOD BILIRUBIN ABNORMAL                      | 10058477 | 5 |
| ANTI-PLATELET ANTIBODY                        | 10058542 | 5 |
| VITAMIN B2                                    | 10058767 | 5 |

|                                                |          |   |
|------------------------------------------------|----------|---|
| GENITAL TRACT INFLAMMATION                     | 10058821 | 5 |
| REFUSAL OF EXAMINATION                         | 10058840 | 5 |
| BICYTOPENIA                                    | 10058956 | 5 |
| INCISION SITE COMPLICATION                     | 10059048 | 5 |
| CSF PRESSURE                                   | 10059213 | 5 |
| VENIPUNCTURE                                   | 10059445 | 5 |
| METAMYELOCYTE PERCENTAGE                       | 10059469 | 5 |
| LDL/HDL RATIO                                  | 10059693 | 5 |
| JUGULAR VEIN DISTENSION                        | 10059865 | 5 |
| BLOOD UREA NITROGEN/CREATININE RATIO DECREASED | 10059937 | 5 |
| LE CELLS                                       | 10059939 | 5 |
| BLOOD ALCOHOL                                  | 10059963 | 5 |
| LIGHT CHAIN ANALYSIS INCREASED                 | 10060084 | 5 |
| HUMAN HERPES VIRUS 6 SEROLOGY                  | 10060114 | 5 |
| ANTIPSYCHOTIC DRUG LEVEL                       | 10060142 | 5 |
| PULMONARY ARTERIAL PRESSURE ABNORMAL           | 10060233 | 5 |
| ANTICOAGULATION DRUG LEVEL BELOW THERAPEUTIC   | 10060321 | 5 |
| RETENTION CYST                                 | 10060721 | 5 |
| ILIOTIBIAL BAND SYNDROME                       | 10060813 | 5 |
| LIGHT CHAIN ANALYSIS NORMAL                    | 10060866 | 5 |
| INTRAOCULAR PRESSURE TEST ABNORMAL             | 10060951 | 5 |
| BENIGN NEOPLASM                                | 10060999 | 5 |
| HAEMOPHILUS INFECTION                          | 10061190 | 5 |
| INTRA-ABDOMINAL HAEMORRHAGE                    | 10061249 | 5 |
| MIDDLE EAR DISORDER                            | 10061290 | 5 |
| PNEUMONIA FUNGAL                               | 10061354 | 5 |
| TOXICOLOGIC TEST ABNORMAL                      | 10061382 | 5 |
| SENSORY LEVEL ABNORMAL                         | 10061567 | 5 |
| VITAMIN B COMPLEX DEFICIENCY                   | 10061580 | 5 |
| AORTIC VALVE DISEASE                           | 10061589 | 5 |
| PARAINFLUENZAE VIRUS INFECTION                 | 10061907 | 5 |
| BONE SCAN ABNORMAL                             | 10061941 | 5 |
| BONE SCAN NORMAL                               | 10061942 | 5 |
| GASTROINTESTINAL SCAN                          | 10061945 | 5 |
| SEVERE ACUTE RESPIRATORY SYNDROME              | 10061982 | 5 |
| HEPATECTOMY                                    | 10061997 | 5 |
| LUNG OPERATION                                 | 10062043 | 5 |
| KNEE DEFORMITY                                 | 10062061 | 5 |
| RESPIRATORY TRACT INFECTION VIRAL              | 10062106 | 5 |
| SENSORIMOTOR DISORDER                          | 10062162 | 5 |
| VITAMIN D ABNORMAL                             | 10062188 | 5 |
| MICROANGIOPATHY                                | 10062198 | 5 |
| URINE CANNABINOIDS INCREASED                   | 10062228 | 5 |

|                                     |          |   |
|-------------------------------------|----------|---|
| UTERINE OPERATION                   | 10062234 | 5 |
| SHOULDER DEFORMITY                  | 10062241 | 5 |
| SKIN OPERATION                      | 10062251 | 5 |
| COUGH VARIANT ASTHMA                | 10063076 | 5 |
| CENTRAL PAIN SYNDROME               | 10064012 | 5 |
| CARDIAC SEPTAL DEFECT               | 10064021 | 5 |
| GASTROINTESTINAL TUBE REMOVAL       | 10064069 | 5 |
| HUMAN PAPILLOMA VIRUS TEST POSITIVE | 10064328 | 5 |
| HUMAN PAPILLOMA VIRUS TEST          | 10064542 | 5 |
| BREAKTHROUGH PAIN                   | 10064556 | 5 |
| MICROGRAPHIC SKIN SURGERY           | 10064836 | 5 |
| COITAL BLEEDING                     | 10065019 | 5 |
| UROGRAM                             | 10065096 | 5 |
| PULMONARY HILAR ENLARGEMENT         | 10065291 | 5 |
| CEREBRAL HYPOPERFUSION              | 10065384 | 5 |
| HER2 POSITIVE BREAST CANCER         | 10065430 | 5 |
| CEREBRAL ARTERIOSCLEROSIS           | 10065559 | 5 |
| OESOPHAGEAL FOOD IMPACTION          | 10065567 | 5 |
| MIDDLE EAR INFLAMMATION             | 10065838 | 5 |
| ANEURYSM REPAIR                     | 10066050 | 5 |
| INTRACARDIAC MASS                   | 10066087 | 5 |
| PLASMA CELL MASTITIS                | 10066170 | 5 |
| TOOTH RESTORATION                   | 10085637 | 5 |
| HEAVY METAL TEST                    | 10086051 | 5 |
| RESPIRATORY PATHOGEN PANEL          | 10086457 | 5 |
| ABSTAINS FROM ALCOHOL               | 10000340 | 4 |
| ACCIDENT AT HOME                    | 10000370 | 4 |
| ACCIDENT AT WORK                    | 10000372 | 4 |
| ACTINIC KERATOSIS                   | 10000614 | 4 |
| ACUTE PROMYELOCYTIC LEUKAEMIA       | 10001019 | 4 |
| ADMINISTRATION SITE REACTION        | 10001315 | 4 |
| ALPHA 1 FOETOPROTEIN INCREASED      | 10001781 | 4 |
| ALPHA 1 GLOBULIN                    | 10001783 | 4 |
| ANAL FISSURE                        | 10002153 | 4 |
| ANTIMITOCHONDRIAL ANTIBODY NORMAL   | 10002798 | 4 |
| ANTIMITOCHONDRIAL ANTIBODY POSITIVE | 10002799 | 4 |
| ARTERIAL CATHETERISATION ABNORMAL   | 10003149 | 4 |
| ARTERIAL INJURY                     | 10003162 | 4 |
| ARTHROGRAM                          | 10003278 | 4 |
| ATROPHIC VULVOVAGINITIS             | 10003693 | 4 |
| BENIGN HYDATIDIFORM MOLE            | 10004272 | 4 |
| BIOPSY BRAIN ABNORMAL               | 10004742 | 4 |
| BIOPSY LIVER NORMAL                 | 10004793 | 4 |

|                                              |          |   |
|----------------------------------------------|----------|---|
| BIOPSY TONGUE ABNORMAL                       | 10004892 | 4 |
| BLOOD BILIRUBIN UNCONJUGATED INCREASED       | 10005370 | 4 |
| BLOOD BILIRUBIN UNCONJUGATED NORMAL          | 10005371 | 4 |
| BLOOD CREATINE ABNORMAL                      | 10005462 | 4 |
| BLOOD CREATINE DECREASED                     | 10005463 | 4 |
| BLOOD FOLLICLE STIMULATING HORMONE ABNORMAL  | 10005532 | 4 |
| BLOOD FOLLICLE STIMULATING HORMONE DECREASED | 10005533 | 4 |
| BLOOD IMMUNOGLOBULIN A DECREASED             | 10005585 | 4 |
| BLOOD INSULIN INCREASED                      | 10005614 | 4 |
| BLOOD IRON ABNORMAL                          | 10005617 | 4 |
| BLOOD LEAD                                   | 10005639 | 4 |
| BLOOD OESTROGEN NORMAL                       | 10005689 | 4 |
| BRAIN ABSCESS                                | 10006105 | 4 |
| BRAIN NEOPLASM MALIGNANT                     | 10006131 | 4 |
| BREAST CANCER STAGE I                        | 10006199 | 4 |
| BREAST CANCER STAGE IV                       | 10006202 | 4 |
| BUNION OPERATION                             | 10006586 | 4 |
| CARCINOID TUMOUR                             | 10007275 | 4 |
| CARDIAC OUTPUT DECREASED                     | 10007595 | 4 |
| CERVICAL CORD COMPRESSION                    | 10008252 | 4 |
| CERVICAL DYSPLASIA                           | 10008263 | 4 |
| CHOLECYSTOSTOMY                              | 10008624 | 4 |
| CHONDRITIS                                   | 10008685 | 4 |
| CLUBBING                                     | 10009691 | 4 |
| COAGULATION FACTOR VIII LEVEL INCREASED      | 10009770 | 4 |
| COLOUR VISION TESTS                          | 10010055 | 4 |
| CONDUCTION DISORDER                          | 10010276 | 4 |
| CONTACT LENS INTOLERANCE                     | 10010804 | 4 |
| CONTRAST MEDIA REACTION                      | 10010836 | 4 |
| COOMBS DIRECT TEST NEGATIVE                  | 10010931 | 4 |
| COWS MILK FREE DIET                          | 10011244 | 4 |
| COXSACKIE VIRAL INFECTION                    | 10011261 | 4 |
| CREATININE RENAL CLEARANCE NORMAL            | 10011374 | 4 |
| CSF CELL COUNT INCREASED                     | 10011522 | 4 |
| DEAFNESS PERMANENT                           | 10011894 | 4 |
| DELUSIONAL DISORDER, UNSPECIFIED TYPE        | 10012255 | 4 |
| DELUSIONAL PERCEPTION                        | 10012258 | 4 |
| DERMATITIS INFECTED                          | 10012470 | 4 |
| DIABETES INSIPIDUS                           | 10012599 | 4 |
| DIABETIC COMA                                | 10012650 | 4 |
| DIABETIC RETINOPATHY                         | 10012689 | 4 |
| DIAPHRAGM MUSCLE WEAKNESS                    | 10012708 | 4 |
| DIRECTIONAL DOPPLER FLOW TESTS               | 10013047 | 4 |

|                                              |          |   |
|----------------------------------------------|----------|---|
| DISSOCIATIVE AMNESIA                         | 10013461 | 4 |
| DRUG DEPENDENCE                              | 10013663 | 4 |
| DRUG LEVEL DECREASED                         | 10013718 | 4 |
| ECTOPIC PREGNANCY TERMINATION                | 10014168 | 4 |
| ELECTROCARDIOGRAM QRS COMPLEX PROLONGED      | 10014380 | 4 |
| ENANTHEMA                                    | 10014579 | 4 |
| ENDOCARDITIS BACTERIAL                       | 10014666 | 4 |
| FOETAL DISTRESS SYNDROME                     | 10016855 | 4 |
| FORCEPS DELIVERY                             | 10016991 | 4 |
| FRONTAL SINUS OPERATION                      | 10017379 | 4 |
| GLOMERULAR FILTRATION RATE ABNORMAL          | 10018356 | 4 |
| GLOSSOPHARYNGEAL NEURALGIA                   | 10018391 | 4 |
| GLUCOSE-6-PHOSPHATE DEHYDROGENASE DEFICIENCY | 10018444 | 4 |
| GLYCOSYLATED HAEMOGLOBIN ABNORMAL            | 10018481 | 4 |
| GRANULOCYTE COUNT DECREASED                  | 10018681 | 4 |
| HAEMORRHAGE SUBEPIDERMAL                     | 10019001 | 4 |
| HEPATIC NECROSIS                             | 10019692 | 4 |
| HEPATITIS ALCOHOLIC                          | 10019728 | 4 |
| HETEROPHORIA                                 | 10020015 | 4 |
| HYDROSALPINX                                 | 10020531 | 4 |
| HYPERCHLORAEMIA                              | 10020597 | 4 |
| HYPERPLASIA                                  | 10020718 | 4 |
| HYPERTRIGLYCERIDAEMIA                        | 10020869 | 4 |
| HYPERTROPHY                                  | 10020880 | 4 |
| HYPERURICAEMIA                               | 10020903 | 4 |
| HYPOKALAEMIC SYNDROME                        | 10021017 | 4 |
| HYSTEOSALPINGOGRAM                           | 10021167 | 4 |
| ILEUS PARALYTIC                              | 10021333 | 4 |
| IMMUNOGLOBULINS DECREASED                    | 10021499 | 4 |
| IMMUNOGLOBULINS INCREASED                    | 10021500 | 4 |
| INDIFFERENCE                                 | 10021703 | 4 |
| INGUINAL HERNIA                              | 10022016 | 4 |
| INTERNAL FIXATION OF FRACTURE                | 10022576 | 4 |
| INTRA-CEREBRAL ANEURYSM OPERATION            | 10022736 | 4 |
| IODINE UPTAKE INCREASED                      | 10022922 | 4 |
| IRON BINDING CAPACITY TOTAL ABNORMAL         | 10022961 | 4 |
| KELOID SCAR                                  | 10023330 | 4 |
| LARYNGOSCOPY NORMAL                          | 10023890 | 4 |
| LEIOMYOSARCOMA                               | 10024189 | 4 |
| LICHENIFICATION                              | 10024438 | 4 |
| LIPOATROPHY                                  | 10024604 | 4 |
| LUNG LOBECTOMY                               | 10024741 | 4 |
| LOOSE BODY IN JOINT                          | 10024829 | 4 |

|                                               |          |   |
|-----------------------------------------------|----------|---|
| LUNG ADENOCARCINOMA                           | 10025031 | 4 |
| LUNG CARCINOMA CELL TYPE UNSPECIFIED STAGE IV | 10025070 | 4 |
| MACULOPATHY                                   | 10025425 | 4 |
| MALIGNANT ASCITES                             | 10025538 | 4 |
| MALIGNANT PLEURAL EFFUSION                    | 10026673 | 4 |
| METABOLIC ALKALOSIS                           | 10027423 | 4 |
| MUCOSA VESICLE                                | 10028103 | 4 |
| MULTIPLE INJURIES                             | 10028224 | 4 |
| MULTIPLE PREGNANCY                            | 10028243 | 4 |
| MUSCULAR DYSTROPHY                            | 10028356 | 4 |
| MYASTHENIC SYNDROME                           | 10028424 | 4 |
| NEPHRECTOMY                                   | 10029116 | 4 |
| NORMOCHROMIC NORMOCYTIC ANAEMIA               | 10029783 | 4 |
| OESTRADIOL DECREASED                          | 10030229 | 4 |
| OMENECTOMY                                    | 10030305 | 4 |
| OPTIC ATROPHY                                 | 10030910 | 4 |
| ORAL DISCHARGE                                | 10030972 | 4 |
| OVARIAN CYSTECTOMY                            | 10033137 | 4 |
| OVERGROWTH BACTERIAL                          | 10033302 | 4 |
| PERIODONTITIS                                 | 10034539 | 4 |
| PERIPHERAL MOTOR NEUROPATHY                   | 10034580 | 4 |
| PICKWICKIAN SYNDROME                          | 10035004 | 4 |
| PITYRIASIS RUBRA PILARIS                      | 10035116 | 4 |
| PLACENTA PRAEVIA HAEMORRHAGE                  | 10035121 | 4 |
| PLEURAL DISORDER                              | 10035595 | 4 |
| PNEUMONIA LEGIONELLA                          | 10035718 | 4 |
| POVERTY OF SPEECH                             | 10036467 | 4 |
| PUSTULAR PSORIASIS                            | 10037575 | 4 |
| QUADRIPLEGIA                                  | 10037714 | 4 |
| RADIAL NERVE INJURY                           | 10037749 | 4 |
| RASH SCARLATINIFORM                           | 10037890 | 4 |
| RECURRENT CANCER                              | 10038111 | 4 |
| RENAL ABSCESS                                 | 10038351 | 4 |
| RENAL ARTERY STENOSIS                         | 10038378 | 4 |
| RENAL ARTERY THROMBOSIS                       | 10038380 | 4 |
| RENIN                                         | 10038555 | 4 |
| RESPIRATORY TRACT HAEMORRHAGE                 | 10038727 | 4 |
| RETAINED PRODUCTS OF CONCEPTION               | 10038773 | 4 |
| RETICULOCYTE COUNT DECREASED                  | 10038790 | 4 |
| RETINOPATHY                                   | 10038923 | 4 |
| SALMONELLOSIS                                 | 10039447 | 4 |
| SCARLET FEVER                                 | 10039587 | 4 |
| SINGLE PHOTON EMISSION COMPUTERISED TOMOGRAM  | 10040722 | 4 |

|                                  |          |   |
|----------------------------------|----------|---|
| SKULL X-RAY NORMAL               | 10040966 | 4 |
| SMOOTH MUSCLE ANTIBODY NEGATIVE  | 10041228 | 4 |
| SOLILOQUY                        | 10041308 | 4 |
| SPINAL DECOMPRESSION             | 10041563 | 4 |
| SPIROMETRY ABNORMAL              | 10041630 | 4 |
| STEATORRHOEA                     | 10041969 | 4 |
| STRESS AT WORK                   | 10042210 | 4 |
| SUBCUTANEOUS HAEMATOMA           | 10042345 | 4 |
| SUBDURAL HAEMATOMA EVACUATION    | 10042363 | 4 |
| SURGICAL PROCEDURE REPEATED      | 10042618 | 4 |
| SYNOVIAL RUPTURE                 | 10042862 | 4 |
| SYRINGOMYELIA                    | 10042928 | 4 |
| TEMPORAL LOBE EPILEPSY           | 10043209 | 4 |
| THOUGHT BLOCKING                 | 10043495 | 4 |
| TINEA PEDIS                      | 10043873 | 4 |
| TONSILLECTOMY                    | 10044006 | 4 |
| TOXIC EPIDERMAL NECROLYSIS       | 10044223 | 4 |
| TRICHOMONIASIS                   | 10044620 | 4 |
| TYMPANOMETRY NORMAL              | 10045216 | 4 |
| ULNAR NERVE INJURY               | 10045378 | 4 |
| ULTRASOUND BLADDER ABNORMAL      | 10045407 | 4 |
| URETHRAL DISORDER                | 10046445 | 4 |
| URETHRAL SPASM                   | 10046464 | 4 |
| URETHRITIS                       | 10046480 | 4 |
| VACUUM EXTRACTOR DELIVERY        | 10046868 | 4 |
| VENOUS INJURY                    | 10047228 | 4 |
| VENTRICULO-PERITONEAL SHUNT      | 10047304 | 4 |
| VERTEBROBASILAR INSUFFICIENCY    | 10047334 | 4 |
| VERTIGO CNS ORIGIN               | 10047343 | 4 |
| WHITE BLOOD CELLS STOOL POSITIVE | 10047963 | 4 |
| WOUND DEHISCENCE                 | 10048031 | 4 |
| BIOPSY CHORIONIC VILLOUS         | 10048536 | 4 |
| PERIPHERAL PULSE DECREASED       | 10048718 | 4 |
| MULTIPLE-DRUG RESISTANCE         | 10048723 | 4 |
| COLON ADENOMA                    | 10048832 | 4 |
| RECTAL EXAMINATION               | 10048892 | 4 |
| VAGINAL MUCOSAL BLISTERING       | 10048904 | 4 |
| PERFORMANCE STATUS DECREASED     | 10048919 | 4 |
| OTOSCOPY                         | 10048929 | 4 |
| URINARY TRACT INFECTION FUNGAL   | 10049059 | 4 |
| VASCULAR GRAFT OCCLUSION         | 10049060 | 4 |
| SALIVA DISCOLOURATION            | 10049069 | 4 |
| OCULAR MYASTHENIA                | 10049168 | 4 |

|                                 |          |   |
|---------------------------------|----------|---|
| GINGIVAL INJURY                 | 10049300 | 4 |
| SPINAL CORD INFECTION           | 10049654 | 4 |
| HOMICIDAL IDEATION              | 10049666 | 4 |
| LHERMITTE'S SIGN                | 10049690 | 4 |
| PERICARDIAL RUB                 | 10049759 | 4 |
| CALCIFICATION OF MUSCLE         | 10049797 | 4 |
| SINGLE UMBILICAL ARTERY         | 10049807 | 4 |
| CARDIAC DEATH                   | 10049993 | 4 |
| APPLICATION SITE BRUISE         | 10050114 | 4 |
| LYMPH NODE ABSCESS              | 10050167 | 4 |
| MACROCEPHALY                    | 10050183 | 4 |
| SELF ESTEEM DECREASED           | 10050280 | 4 |
| OTIC EXAMINATION                | 10050319 | 4 |
| PROSTATIC SPECIFIC ANTIGEN      | 10050704 | 4 |
| BAND NEUTROPHIL COUNT INCREASED | 10050759 | 4 |
| HYPOCHROMASIA                   | 10050789 | 4 |
| ORAL DYSAESTHESIA               | 10050820 | 4 |
| BREAST PROSTHESIS USER          | 10050854 | 4 |
| DENTAL CLEANING                 | 10051047 | 4 |
| CARDIOPULMONARY FAILURE         | 10051093 | 4 |
| INCISION SITE HAEMORRHAGE       | 10051100 | 4 |
| FOETAL HEART RATE NORMAL        | 10051140 | 4 |
| DIABETIC GASTROPARESIS          | 10051153 | 4 |
| FLUID IMBALANCE                 | 10051283 | 4 |
| DIABETES MELLITUS MANAGEMENT    | 10051599 | 4 |
| INTRANASAL PARAESTHESIA         | 10051660 | 4 |
| ESCHAR                          | 10051814 | 4 |
| ASTHMA PROPHYLAXIS              | 10066654 | 4 |
| LICHEN STRIATUS                 | 10066945 | 4 |
| RETINOPEXY                      | 10066985 | 4 |
| TONGUE ABSCESS                  | 10066991 | 4 |
| MENSTRUAL CYCLE MANAGEMENT      | 10067029 | 4 |
| CENTRAL VENOUS CATHETER REMOVAL | 10067098 | 4 |
| INJECTION SITE LACERATION       | 10067253 | 4 |
| THROMBOTIC CEREBRAL INFARCTION  | 10067347 | 4 |
| DECREASED VIBRATORY SENSE       | 10067502 | 4 |
| LOW BIRTH WEIGHT BABY           | 10067508 | 4 |
| NEUROSENSORY HYPOACUSIS         | 10067587 | 4 |
| WINGED SCAPULA                  | 10067628 | 4 |
| PREMATURE OVULATION             | 10068042 | 4 |
| CEREBRAL AMYLOID ANGIOPATHY     | 10068044 | 4 |
| INHIBITORY DRUG INTERACTION     | 10068071 | 4 |
| FOREIGN BODY REACTION           | 10068159 | 4 |



|                                           |          |   |
|-------------------------------------------|----------|---|
| ANDROGENETIC ALOPECIA                     | 10068168 | 4 |
| CARDIORENAL SYNDROME                      | 10068230 | 4 |
| REFLEX TEST ABNORMAL                      | 10068273 | 4 |
| MAMMOPLASTY                               | 10068647 | 4 |
| VIRAL CARDIOMYOPATHY                      | 10068767 | 4 |
| PERIportal OEDEMA                         | 10068821 | 4 |
| CEREBROSPINAL FLUID DRAINAGE              | 10068892 | 4 |
| TONGUE PIGMENTATION                       | 10069164 | 4 |
| SMOKE SENSITIVITY                         | 10069201 | 4 |
| PRODUCT FORMULATION ISSUE                 | 10069228 | 4 |
| PRODUCT SUBSTITUTION ISSUE                | 10069326 | 4 |
| VALSALVA MANEUVER                         | 10069420 | 4 |
| ORTHOSTATIC HEART RATE RESPONSE INCREASED | 10069431 | 4 |
| CSF IMMUNOGLOBULIN G INDEX                | 10069597 | 4 |
| SUBCLAVIAN ARTERY OCCLUSION               | 10069695 | 4 |
| BIOPSY SOFT TISSUE                        | 10069752 | 4 |
| H1N1 INFLUENZA                            | 10069767 | 4 |
| OMENTAL INFARCTION                        | 10069886 | 4 |
| BORDETELLA TEST POSITIVE                  | 10070010 | 4 |
| ENTEROBACTER TEST POSITIVE                | 10070023 | 4 |
| MYCOPLASMA TEST POSITIVE                  | 10070160 | 4 |
| HEPATITIS B VIRUS TEST POSITIVE           | 10070217 | 4 |
| HEPATITIS C VIRUS TEST POSITIVE           | 10070218 | 4 |
| STREPTOCOCCAL URINARY TRACT INFECTION     | 10070300 | 4 |
| PARVOVIRUS B19 TEST POSITIVE              | 10070338 | 4 |
| ASPERGILLUS TEST                          | 10070450 | 4 |
| WRONG DEVICE USED                         | 10070468 | 4 |
| OESOPHAGEAL IRRITATION                    | 10070818 | 4 |
| FEMOROACETABULAR IMPINGEMENT              | 10070899 | 4 |
| HUMAN ANAPLASMOSIS                        | 10071038 | 4 |
| CLINICALLY ISOLATED SYNDROME              | 10071068 | 4 |
| IDIOPATHIC GENERALISED EPILEPSY           | 10071081 | 4 |
| AUTOIMMUNE ARTHRITIS                      | 10071155 | 4 |
| IMPAIRED REASONING                        | 10071176 | 4 |
| HEPATITIS B SURFACE ANTIBODY NEGATIVE     | 10071347 | 4 |
| MACULAR FIBROSIS                          | 10071392 | 4 |
| ANTI-AQUAPORIN-4 ANTIBODY                 | 10071466 | 4 |
| PSEUDOHYPONATRAEMIA                       | 10072126 | 4 |
| PRERENAL FAILURE                          | 10072370 | 4 |
| ANTI-AQUAPORIN-4 ANTIBODY NEGATIVE        | 10072507 | 4 |
| ANTI-GANGLIOSIDE ANTIBODY POSITIVE        | 10072516 | 4 |
| PERIPHERAL ENDARTERECTOMY                 | 10072560 | 4 |
| PERIPHERAL ARTERY STENT INSERTION         | 10072562 | 4 |

|                                         |          |   |
|-----------------------------------------|----------|---|
| CONTRACEPTIVE IMPLANT                   | 10072571 | 4 |
| KLEIHAUER-BETKE TEST NEGATIVE           | 10072576 | 4 |
| ORTHOPAEDIC EXAMINATION                 | 10072624 | 4 |
| ORTHOPAEDIC EXAMINATION ABNORMAL        | 10072625 | 4 |
| HAND-EYE COORDINATION IMPAIRED          | 10072649 | 4 |
| HUMIDITY INTOLERANCE                    | 10072791 | 4 |
| MACROPHAGE COUNT                        | 10072857 | 4 |
| ADNEXAL TORSION                         | 10072943 | 4 |
| TERM BIRTH                              | 10072953 | 4 |
| LOBULAR BREAST CARCINOMA IN SITU        | 10073099 | 4 |
| ROMBERG TEST                            | 10073238 | 4 |
| EXPOSURE VIA EYE CONTACT                | 10073336 | 4 |
| DECEREBRATE POSTURE                     | 10073346 | 4 |
| INJECTION SITE JOINT DISCOMFORT         | 10073459 | 4 |
| INSTILLATION SITE PARAESTHESIA          | 10073558 | 4 |
| PHARYNGEAL ENANTHEMA                    | 10073741 | 4 |
| TRIGEMINAL NEURITIS                     | 10074054 | 4 |
| T-CELL RECEPTOR GENE REARRANGEMENT TEST | 10074077 | 4 |
| AXILLARY WEB SYNDROME                   | 10074387 | 4 |
| VENA CAVA FILTER REMOVAL                | 10074397 | 4 |
| CATHETER MANAGEMENT                     | 10074414 | 4 |
| DURAL ARTERIOVENOUS FISTULA             | 10074462 | 4 |
| ADAMTS13 ACTIVITY NORMAL                | 10074492 | 4 |
| LARGE INTESTINAL POLYPECTOMY            | 10074625 | 4 |
| INCISION SITE SWELLING                  | 10074758 | 4 |
| CAFFEINE ALLERGY                        | 10074895 | 4 |
| TONIC POSTURING                         | 10075125 | 4 |
| NEUROPATHIC MUSCULAR ATROPHY            | 10075469 | 4 |
| STOMA SITE DISCHARGE                    | 10075512 | 4 |
| AUTOIMMUNE DEMYELINATING DISEASE        | 10075688 | 4 |
| ADMINISTRATION SITE NODULE              | 10075765 | 4 |
| AMNIOTIC FLUID INDEX DECREASED          | 10075866 | 4 |
| VACCINATION SITE ECZEMA                 | 10076161 | 4 |
| TRANSCRIPTION MEDICATION ERROR          | 10076245 | 4 |
| INJECTION SITE JOINT ERYTHEMA           | 10076327 | 4 |
| TUMOUR MARKER DECREASED                 | 10076385 | 4 |
| LUMBOSACRAL RADICULOPATHY               | 10076578 | 4 |
| ACUTE MOTOR AXONAL NEUROPATHY           | 10076658 | 4 |
| EXTERNAL COMPRESSION HEADACHE           | 10076669 | 4 |
| ALLERGY TO SYNTHETIC FABRIC             | 10076764 | 4 |
| TRANSCATHETER AORTIC VALVE IMPLANTATION | 10077015 | 4 |
| VASCULAR STENT STENOSIS                 | 10077144 | 4 |
| MYELOPROLIFERATIVE NEOPLASM             | 10077465 | 4 |

|                                           |          |   |
|-------------------------------------------|----------|---|
| SENSORY PROCESSING DISORDER               | 10077516 | 4 |
| PALATAL ULCER                             | 10077519 | 4 |
| TENOPLASTY                                | 10077558 | 4 |
| PRODUCT SUPPLY ISSUE                      | 10077801 | 4 |
| OBSESSIVE-COMPULSIVE SYMPTOM              | 10077894 | 4 |
| ILLNESS ANXIETY DISORDER                  | 10078077 | 4 |
| GENITO-PELVIC PAIN/PENETRATION DISORDER   | 10078087 | 4 |
| FOETAL BIOPHYSICAL PROFILE SCORE ABNORMAL | 10078124 | 4 |
| PULMONARY ARTERY OCCLUSION                | 10078201 | 4 |
| ABDOMINAL WALL WOUND                      | 10078479 | 4 |
| CONTRAINDICATED PRODUCT ADMINISTERED      | 10078504 | 4 |
| ULTRASOUND PANCREAS ABNORMAL              | 10078673 | 4 |
| AUDITORY NERVE DISORDER                   | 10078794 | 4 |
| DECREASED EMBRYO VIABILITY                | 10078930 | 4 |
| RENAL TUBULAR INJURY                      | 10078933 | 4 |
| DISEASE RISK FACTOR                       | 10078950 | 4 |
| DENTAL RESTORATION FAILURE                | 10078978 | 4 |
| FOETAL RENAL IMPAIRMENT                   | 10078987 | 4 |
| PSYCHOTIC SYMPTOM                         | 10079254 | 4 |
| STIFF LEG SYNDROME                        | 10079359 | 4 |
| PRODUCT USE COMPLAINT                     | 10079400 | 4 |
| DRAIN SITE COMPLICATION                   | 10079626 | 4 |
| SERUM SEROTONIN                           | 10079787 | 4 |
| MANDIBULAR MASS                           | 10079878 | 4 |
| TRANSIENT APHASIA                         | 10080106 | 4 |
| ENTEROCOCCUS TEST                         | 10080177 | 4 |
| IRREGULAR SLEEP WAKE RHYTHM DISORDER      | 10080301 | 4 |
| WRONG SCHEDULE                            | 10080303 | 4 |
| ANTI-HLA ANTIBODY TEST                    | 10080511 | 4 |
| PERIORBITAL INFLAMMATION                  | 10080722 | 4 |
| NOROVIRUS TEST                            | 10080822 | 4 |
| RHESUS ANTIGEN                            | 10080952 | 4 |
| WRONG DOSAGE FORMULATION                  | 10080975 | 4 |
| LITHIASIS                                 | 10081111 | 4 |
| OPHTHALMIC ARTERY THROMBOSIS              | 10081144 | 4 |
| BACILLE CALMETTE-GUERIN SCAR REACTIVATION | 10081210 | 4 |
| INTRAOSSEOUS ACCESS PLACEMENT             | 10081231 | 4 |
| ALCOHOL TEST                              | 10081296 | 4 |
| MUSCLE TENSION DYSPHONIA                  | 10081496 | 4 |
| ANTI-GLOMERULAR BASEMENT MEMBRANE DISEASE | 10081981 | 4 |
| NONALCOHOLIC FATTY LIVER DISEASE          | 10082249 | 4 |
| ANTI-RNA POLYMERASE III ANTIBODY NEGATIVE | 10082282 | 4 |
| SKIN TEMPERATURE                          | 10082526 | 4 |

|                                                   |          |   |
|---------------------------------------------------|----------|---|
| LYMPH NODE RUPTURE                                | 10082725 | 4 |
| FLUORESCENCE ANGIOGRAM                            | 10083089 | 4 |
| HORMONE RECEPTOR POSITIVE BREAST CANCER           | 10083234 | 4 |
| INTERNAL CAPSULE INFARCTION                       | 10083408 | 4 |
| ADENOCARCINOMA METASTATIC                         | 10083456 | 4 |
| COMPUTERISED TOMOGRAM AORTA                       | 10083572 | 4 |
| CARDIAC PERFUSION DEFECT                          | 10083602 | 4 |
| PHARYNGEAL PUSTULE                                | 10084148 | 4 |
| NEONATAL DYSPNOEA                                 | 10084238 | 4 |
| SARS-COV-2 TEST FALSE NEGATIVE                    | 10084480 | 4 |
| TROPONIN I ABNORMAL                               | 10084969 | 4 |
| TROPONIN I DECREASED                              | 10084972 | 4 |
| MAGNETIC RESONANCE IMAGING HEPATOBILIARY          | 10085120 | 4 |
| MAGNETIC RESONANCE IMAGING HEPATOBILIARY ABNORMAL | 10085121 | 4 |
| QUANTITATIVE SENSORY TESTING                      | 10085180 | 4 |
| LYMPHATIC OBSTRUCTION                             | 10052315 | 4 |
| BRAIN CONTUSION                                   | 10052346 | 4 |
| GASTROINTESTINAL HYPERMOTILITY                    | 10052402 | 4 |
| LARGE INTESTINAL HAEMORRHAGE                      | 10052534 | 4 |
| DRUG TOLERANCE DECREASED                          | 10052805 | 4 |
| ACQUIRED OESOPHAGEAL WEB                          | 10052820 | 4 |
| ALLEN'S TEST                                      | 10053463 | 4 |
| INFUSION SITE WARMTH                              | 10053484 | 4 |
| VENOUS ANGIOMA OF BRAIN                           | 10053485 | 4 |
| BLOOD TESTOSTERONE FREE INCREASED                 | 10053785 | 4 |
| BACTERIAL SEPSIS                                  | 10053840 | 4 |
| RADIAL PULSE                                      | 10053935 | 4 |
| POSTOPERATIVE ILEUS                               | 10054048 | 4 |
| GENITAL ERYTHEMA                                  | 10054816 | 4 |
| MYOCLONIC EPILEPSY                                | 10054859 | 4 |
| INTERVERTEBRAL DISC COMPRESSION                   | 10055039 | 4 |
| THYROXINE FREE ABNORMAL                           | 10055158 | 4 |
| PNEUMONIA NECROTISING                             | 10055672 | 4 |
| HAEMATOMA MUSCLE                                  | 10055890 | 4 |
| TINEA VERSICOLOUR                                 | 10056131 | 4 |
| PAIN MANAGEMENT                                   | 10056350 | 4 |
| TRACHEOMALACIA                                    | 10056397 | 4 |
| DEHYDROEPIANDROSTERONE DECREASED                  | 10056629 | 4 |
| PSEUDOCYST                                        | 10056658 | 4 |
| WEIGHT ABNORMAL                                   | 10056814 | 4 |
| SALIVARY GLAND MASS                               | 10057002 | 4 |
| BLAST CELLS PRESENT                               | 10057107 | 4 |
| IRRITABILITY POSTVACCINAL                         | 10057224 | 4 |

|                                        |          |   |
|----------------------------------------|----------|---|
| CONNECTIVE TISSUE INFLAMMATION         | 10057254 | 4 |
| VASCULAR TEST ABNORMAL                 | 10057458 | 4 |
| VASCULAR TEST NORMAL                   | 10057523 | 4 |
| CARDIAC SEPTAL HYPERTROPHY             | 10057576 | 4 |
| PROCEDURAL COMPLICATION                | 10057765 | 4 |
| VENTRICULAR INTERNAL DIAMETER          | 10057921 | 4 |
| CHEMICAL BURN OF SKIN                  | 10057941 | 4 |
| MUSCLE ENZYME INCREASED                | 10057945 | 4 |
| RHEUMATOID FACTOR DECREASED            | 10057961 | 4 |
| GLOBULINS DECREASED                    | 10058001 | 4 |
| HYPEREXPLEXIA                          | 10058271 | 4 |
| MENOPAUSAL DISORDER                    | 10058825 | 4 |
| DISTURBANCE IN SEXUAL AROUSAL          | 10058929 | 4 |
| THALAMUS HAEMORRHAGE                   | 10058939 | 4 |
| ILIAC VEIN OCCLUSION                   | 10058992 | 4 |
| RETINAL WHITE DOTS SYNDROME            | 10059081 | 4 |
| INFLUENZA IMMUNISATION                 | 10059429 | 4 |
| SYNOVIAL FLUID ANALYSIS ABNORMAL       | 10059526 | 4 |
| ENDOCRINE TEST NORMAL                  | 10059700 | 4 |
| ANTI-GAD ANTIBODY                      | 10059729 | 4 |
| CSF MYELIN BASIC PROTEIN               | 10059773 | 4 |
| PACEMAKER GENERATED RHYTHM             | 10059831 | 4 |
| DRUG RESISTANCE                        | 10059866 | 4 |
| PLATELET MORPHOLOGY                    | 10059906 | 4 |
| RETICULOCYTE PERCENTAGE INCREASED      | 10059920 | 4 |
| GASTRIC PH DECREASED                   | 10060041 | 4 |
| ANTIBIOTIC LEVEL                       | 10060317 | 4 |
| ANTICOAGULATION DRUG LEVEL             | 10060318 | 4 |
| ANTICOAGULATION DRUG LEVEL THERAPEUTIC | 10060319 | 4 |
| DIABETIC FOOT INFECTION                | 10060803 | 4 |
| CALCIUM IONISED                        | 10060900 | 4 |
| ABDOMINAL NEOPLASM                     | 10060925 | 4 |
| AMNIOTIC CAVITY INFECTION              | 10060937 | 4 |
| BASOPHIL COUNT ABNORMAL                | 10060978 | 4 |
| LABOUR COMPLICATION                    | 10061050 | 4 |
| CRANIAL NERVE INJURY                   | 10061094 | 4 |
| DISTURBANCE IN SOCIAL BEHAVIOUR        | 10061108 | 4 |
| GASTROINTESTINAL INJURY                | 10061172 | 4 |
| IMPULSE-CONTROL DISORDER               | 10061215 | 4 |
| LYMPHOPROLIFERATIVE DISORDER           | 10061232 | 4 |
| INVESTIGATION ABNORMAL                 | 10061253 | 4 |
| MUCOSAL HAEMORRHAGE                    | 10061298 | 4 |
| POSTPARTUM DISORDER                    | 10061469 | 4 |

|                                                    |          |   |
|----------------------------------------------------|----------|---|
| SCAN ABDOMEN ABNORMAL                              | 10061502 | 4 |
| SCAN LYMPH NODES                                   | 10061504 | 4 |
| SCAN SPLEEN                                        | 10061506 | 4 |
| LIP AND/OR ORAL CAVITY CANCER                      | 10061523 | 4 |
| PITUITARY TUMOUR BENIGN                            | 10061538 | 4 |
| URINARY TRACT OBSTRUCTION                          | 10061574 | 4 |
| AMPUTATION                                         | 10061627 | 4 |
| ARTERIOGRAM ABNORMAL                               | 10061659 | 4 |
| CHONDROCALCINOSIS                                  | 10061761 | 4 |
| COOMBS TEST                                        | 10061786 | 4 |
| DIVERTICULAR PERFORATION                           | 10061820 | 4 |
| EXTRADURAL ABSCESS                                 | 10061846 | 4 |
| PYELOCALIECTASIS                                   | 10061927 | 4 |
| HEART VALVE REPLACEMENT                            | 10061995 | 4 |
| INTESTINAL OPERATION                               | 10062024 | 4 |
| PH BODY FLUID ABNORMAL                             | 10062071 | 4 |
| RED BLOOD CELL MORPHOLOGY ABNORMAL                 | 10062100 | 4 |
| STENT REMOVAL                                      | 10062115 | 4 |
| THYROID OPERATION                                  | 10062126 | 4 |
| URINARY SYSTEM X-RAY ABNORMAL                      | 10062138 | 4 |
| MITRAL VALVE REPAIR                                | 10062202 | 4 |
| NASAL OPERATION                                    | 10062210 | 4 |
| URINE ELECTROLYTES NORMAL                          | 10062230 | 4 |
| UTERINE INFECTION                                  | 10062233 | 4 |
| SOFT TISSUE INFECTION                              | 10062255 | 4 |
| GENITAL ABSCESS                                    | 10062316 | 4 |
| VULVAR EROSION                                     | 10062559 | 4 |
| URETHRITIS NONINFECTIVE                            | 10062903 | 4 |
| OPIATES POSITIVE                                   | 10063232 | 4 |
| CD4 LYMPHOCYTES INCREASED                          | 10063294 | 4 |
| DNA TEST FOR FRAGILE X                             | 10063296 | 4 |
| AMNIOTIC FLUID VOLUME INCREASED                    | 10063357 | 4 |
| VENOUS STENT INSERTION                             | 10063389 | 4 |
| RELAPSING-REMITTING MULTIPLE SCLEROSIS             | 10063399 | 4 |
| PRURITUS ALLERGIC                                  | 10063438 | 4 |
| PREMATURE AGEING                                   | 10063493 | 4 |
| EROSIVE OESOPHAGITIS                               | 10063655 | 4 |
| EYELID CYST                                        | 10063692 | 4 |
| IMPLANT SITE PAIN                                  | 10063782 | 4 |
| NON-HIGH-DENSITY LIPOPROTEIN CHOLESTEROL INCREASED | 10063967 | 4 |
| ANTIALLERGIC THERAPY                               | 10064059 | 4 |
| SOLAR LENTIGO                                      | 10064127 | 4 |
| DEVICE OCCLUSION                                   | 10064685 | 4 |

|                                   |          |   |
|-----------------------------------|----------|---|
| DIABETIC DIET                     | 10064725 | 4 |
| RENAL ARTERY STENT PLACEMENT      | 10064727 | 4 |
| NUTRITIONAL CONDITION ABNORMAL    | 10065026 | 4 |
| APPARENT LIFE THREATENING EVENT   | 10065044 | 4 |
| LATENT TUBERCULOSIS               | 10065048 | 4 |
| BIOPSY GINGIVAL                   | 10065076 | 4 |
| UROGRAM NORMAL                    | 10065098 | 4 |
| FISTULOGRAM                       | 10065149 | 4 |
| SUICIDAL BEHAVIOUR                | 10065604 | 4 |
| DRUG DISPENSED TO WRONG PATIENT   | 10065634 | 4 |
| ACTH STIMULATION TEST             | 10065665 | 4 |
| BONE LOSS                         | 10065687 | 4 |
| VAGINAL FISTULA                   | 10065813 | 4 |
| POST-TUSSIVE VOMITING             | 10066220 | 4 |
| CYTOPENIA                         | 10066274 | 4 |
| PULMONARY ARTERY COMPRESSION      | 10085390 | 4 |
| FOETAL VASCULAR MALPERFUSION      | 10085689 | 4 |
| HEAVY METAL NORMAL                | 10086047 | 4 |
| DERMAL FILLER REACTION            | 10086476 | 4 |
| ACETABULUM FRACTURE               | 10000397 | 3 |
| ACHLORHYDRIA                      | 10000451 | 3 |
| ACNE PUSTULAR                     | 10000513 | 3 |
| ACUTE ABDOMEN                     | 10000647 | 3 |
| ACUTE LEUKAEMIA                   | 10000830 | 3 |
| ACUTE STRESS DISORDER             | 10001084 | 3 |
| ALANINE AMINOTRANSFERASE ABNORMAL | 10001547 | 3 |
| ALICE IN WONDERLAND SYNDROME      | 10001666 | 3 |
| ALKALOSIS                         | 10001680 | 3 |
| ALOPECIA TOTALIS                  | 10001766 | 3 |
| ALPHA 1 GLOBULIN INCREASED        | 10001787 | 3 |
| AMMONIA DECREASED                 | 10001945 | 3 |
| AMNIOCENTESIS ABNORMAL            | 10001959 | 3 |
| ANIMAL SCRATCH                    | 10002519 | 3 |
| ARTERIAL RUPTURE                  | 10003173 | 3 |
| ARTERIAL SPASM                    | 10003175 | 3 |
| ARTIFICIAL RUPTURE OF MEMBRANES   | 10003440 | 3 |
| ASPIRATION JOINT ABNORMAL         | 10003518 | 3 |
| ATOPY                             | 10003645 | 3 |
| ATRIAL SEPTAL DEFECT REPAIR       | 10003667 | 3 |
| AURICULAR SWELLING                | 10003800 | 3 |
| AXONAL NEUROPATHY                 | 10003882 | 3 |
| BABESIOSIS                        | 10003965 | 3 |
| BACTERIAL DISEASE CARRIER         | 10004017 | 3 |

|                                       |          |   |
|---------------------------------------|----------|---|
| BARTHOLIN'S ABSCESS                   | 10004138 | 3 |
| BENIGN HEPATIC NEOPLASM               | 10004269 | 3 |
| BIOPSY BLADDER                        | 10004730 | 3 |
| BIOPSY BLADDER ABNORMAL               | 10004731 | 3 |
| BIOPSY CERVIX NORMAL                  | 10004755 | 3 |
| BIOPSY COLON NORMAL                   | 10004761 | 3 |
| BIOPSY HEART ABNORMAL                 | 10004780 | 3 |
| BIOPSY KIDNEY NORMAL                  | 10004784 | 3 |
| BIOPSY LIP                            | 10004788 | 3 |
| BIOPSY MUSCLE ABNORMAL                | 10004803 | 3 |
| BIOPSY PHARYNX                        | 10004851 | 3 |
| BIOPSY SALIVARY GLAND                 | 10004865 | 3 |
| BIOPSY SITE UNSPECIFIED NORMAL        | 10004872 | 3 |
| BIOPSY STOMACH ABNORMAL               | 10004880 | 3 |
| BIOPSY THYROID GLAND ABNORMAL         | 10004889 | 3 |
| BLASTOMYCOSIS                         | 10005098 | 3 |
| BLOOD ALBUMIN ABNORMAL                | 10005286 | 3 |
| BLOOD ALDOSTERONE NORMAL              | 10005297 | 3 |
| BLOOD COPPER INCREASED                | 10005443 | 3 |
| BLOOD CORTICOTROPHIN NORMAL           | 10005454 | 3 |
| BLOOD GROUP B                         | 10005567 | 3 |
| BLOOD LACTATE DEHYDROGENASE ABNORMAL  | 10005627 | 3 |
| BLOOD LACTATE DEHYDROGENASE DECREASED | 10005629 | 3 |
| BLOOD LEAD NORMAL                     | 10005643 | 3 |
| BLOOD PARATHYROID HORMONE DECREASED   | 10005702 | 3 |
| BLOOD PRESSURE SYSTOLIC ABNORMAL      | 10005757 | 3 |
| BLOOD THROMBOPLASTIN                  | 10005823 | 3 |
| BLOOD ZINC DECREASED                  | 10005867 | 3 |
| BLUNTED AFFECT                        | 10005885 | 3 |
| BODY MASS INDEX INCREASED             | 10005897 | 3 |
| BORDERLINE PERSONALITY DISORDER       | 10006034 | 3 |
| BRADYPNOEA                            | 10006102 | 3 |
| BRAIN NEOPLASM BENIGN                 | 10006129 | 3 |
| BRAIN STEM ISCHAEMIA                  | 10006148 | 3 |
| BREAST NECROSIS                       | 10006277 | 3 |
| BREATHING-RELATED SLEEP DISORDER      | 10006344 | 3 |
| BRONCHOSTENOSIS                       | 10006487 | 3 |
| BURN OF INTERNAL ORGANS               | 10006712 | 3 |
| CALCULUS BLADDER                      | 10006987 | 3 |
| CARBOXYHAEMOGLOBIN                    | 10007239 | 3 |
| CARBUNCLE                             | 10007247 | 3 |
| CARCINOEMBRYONIC ANTIGEN INCREASED    | 10007266 | 3 |
| CARCINOEMBRYONIC ANTIGEN NORMAL       | 10007267 | 3 |



|                                                  |          |   |
|--------------------------------------------------|----------|---|
| CARDIAC HYPERTROPHY                              | 10007572 | 3 |
| CEREBELLAR ATROPHY                               | 10008027 | 3 |
| CERVIX CARCINOMA                                 | 10008342 | 3 |
| CHOLANGITIS SCLEROSING                           | 10008609 | 3 |
| CHOLECYSTITIS CHRONIC                            | 10008617 | 3 |
| CHOREOATHETOSIS                                  | 10008754 | 3 |
| CHRONIC HEPATITIS                                | 10008909 | 3 |
| CHRONIC TONSILLITIS                              | 10009152 | 3 |
| CIRRHOSIS ALCOHOLIC                              | 10009208 | 3 |
| CLAUDICATION OF JAW MUSCLES                      | 10009243 | 3 |
| CLOT RETRACTION                                  | 10009668 | 3 |
| COCHLEA IMPLANT                                  | 10009830 | 3 |
| COLD AGGLUTININS POSITIVE                        | 10009854 | 3 |
| CONSTRICTED AFFECT                               | 10010778 | 3 |
| CORNEAL LESION                                   | 10011026 | 3 |
| CRYOGLOBULINS PRESENT                            | 10011478 | 3 |
| CRYSTAL URINE ABSENT                             | 10011510 | 3 |
| CSF LYMPHOCYTE COUNT                             | 10011547 | 3 |
| CSF LYMPHOCYTE COUNT ABNORMAL                    | 10011548 | 3 |
| CSF PRESSURE NORMAL                              | 10011571 | 3 |
| CULTURE TISSUE SPECIMEN NEGATIVE                 | 10011636 | 3 |
| CYST ASPIRATION                                  | 10011734 | 3 |
| CYSTITIS HAEMORRHAGIC                            | 10011793 | 3 |
| DEVELOPMENTAL DELAY                              | 10012559 | 3 |
| DIASTOLIC HYPERTENSION                           | 10012758 | 3 |
| DISLOCATION OF VERTEBRA                          | 10013183 | 3 |
| DROWNING                                         | 10013647 | 3 |
| DRUG SPECIFIC ANTIBODY PRESENT                   | 10013745 | 3 |
| ECHOENCEPHALOGRAM                                | 10014119 | 3 |
| ECHOLALIA                                        | 10014127 | 3 |
| ECZEMA HERPETICUM                                | 10014197 | 3 |
| ELECTROCARDIOGRAM Q WAVES                        | 10014375 | 3 |
| ELECTROCOCHLEOGRAM                               | 10014398 | 3 |
| ENDOMETRITIS                                     | 10014791 | 3 |
| ENDOSCOPIC RETROGRADE CHOLANGIOPANCREATOGRAPHY A | 10014803 | 3 |
| ENDOSCOPY SMALL INTESTINE                        | 10014816 | 3 |
| EOSINOPHILIC FASCIITIS                           | 10014954 | 3 |
| EPIGLOTTIC OEDEMA                                | 10015029 | 3 |
| EXERCISE ELECTROCARDIOGRAM NORMAL                | 10015646 | 3 |
| EXERCISE TEST                                    | 10015652 | 3 |
| EXTENSOR PLANTAR RESPONSE                        | 10015727 | 3 |
| EXTRADURAL HAEMATOMA                             | 10015769 | 3 |
| EYELID RETRACTION                                | 10015997 | 3 |

|                                    |          |   |
|------------------------------------|----------|---|
| FAILED INDUCTION OF LABOUR         | 10016123 | 3 |
| FALLOT'S TETRALOGY                 | 10016193 | 3 |
| FAMILY STRESS                      | 10016215 | 3 |
| FASCIITIS                          | 10016228 | 3 |
| FIBRIN DEGRADATION PRODUCTS        | 10016585 | 3 |
| FORCED EXPIRATORY VOLUME           | 10016984 | 3 |
| FUNDOSCOPY NORMAL                  | 10017521 | 3 |
| GAMMA-GLUTAMYLTRANSFERASE NORMAL   | 10017694 | 3 |
| GASTRIC CANCER                     | 10017758 | 3 |
| GASTRIC PERFORATION                | 10017815 | 3 |
| GASTROENTEROSTOMY                  | 10017873 | 3 |
| GENETIC COUNSELLING                | 10018138 | 3 |
| GIARDIASIS                         | 10018262 | 3 |
| GLUCOSE TOLERANCE TEST ABNORMAL    | 10018433 | 3 |
| GLUTEN FREE DIET                   | 10018459 | 3 |
| GROWING PAINS                      | 10018745 | 3 |
| HAEMORRHAGIC INFARCTION            | 10019013 | 3 |
| HEART SOUNDS NORMAL                | 10019312 | 3 |
| HEAT STROKE                        | 10019345 | 3 |
| HEPATIC INFARCTION                 | 10019680 | 3 |
| HEPATITIS A                        | 10019719 | 3 |
| HEPATITIS C ANTIBODY POSITIVE      | 10019747 | 3 |
| HEREDITARY ANGIOEDEMA              | 10019860 | 3 |
| HERPANGINA                         | 10019936 | 3 |
| HERPES GESTATIONIS                 | 10019939 | 3 |
| HISTIOCYTOSIS                      | 10020117 | 3 |
| HISTOPLASMOSIS                     | 10020141 | 3 |
| HOLMES-ADIE PUPIL                  | 10020352 | 3 |
| HUMAN EHRlichiosis                 | 10020429 | 3 |
| HYPERADRENALISM                    | 10020562 | 3 |
| HYPERPROTEINAEMIA                  | 10020740 | 3 |
| HYPNOPOMPIC HALLUCINATION          | 10020928 | 3 |
| HYPOTHALAMO-PITUITARY DISORDER     | 10021111 | 3 |
| IMMUNODEFICIENCY COMMON VARIABLE   | 10021449 | 3 |
| IMMUNOELECTROPHORESIS              | 10021464 | 3 |
| INFECTED SKIN ULCER                | 10021784 | 3 |
| INFECTION SUSCEPTIBILITY INCREASED | 10021866 | 3 |
| INFERTILITY TESTS                  | 10021931 | 3 |
| INGROWING NAIL                     | 10022013 | 3 |
| INJECTION SITE GRANULOMA           | 10022065 | 3 |
| INJURY CORNEAL                     | 10022120 | 3 |
| INTRADUCTAL PAPILLOMA OF BREAST    | 10022781 | 3 |
| INTRINSIC FACTOR ANTIBODY POSITIVE | 10022855 | 3 |

|                                     |          |   |
|-------------------------------------|----------|---|
| IODINE UPTAKE                       | 10022917 | 3 |
| IODINE UPTAKE DECREASED             | 10022920 | 3 |
| IRREGULAR SLEEP PHASE               | 10022995 | 3 |
| KETOSIS                             | 10023391 | 3 |
| LACTATION PUERPERAL INCREASED       | 10023671 | 3 |
| LARGE INTESTINE ANASTOMOSIS         | 10023800 | 3 |
| LARYNGEAL STENOSIS                  | 10023862 | 3 |
| LIVING ALONE                        | 10024729 | 3 |
| LONG QT SYNDROME                    | 10024803 | 3 |
| LORDOSIS                            | 10024842 | 3 |
| LOSS OF LIBIDO                      | 10024870 | 3 |
| LUNG ADENOCARCINOMA STAGE IV        | 10025038 | 3 |
| MALLORY-WEISS SYNDROME              | 10026712 | 3 |
| MAMMARY DUCT ECTASIA                | 10026730 | 3 |
| MARROW HYPERPLASIA                  | 10026851 | 3 |
| MEAN ARTERIAL PRESSURE DECREASED    | 10026983 | 3 |
| MEDIASTINOSCOPY                     | 10027083 | 3 |
| MERALGIA PARAESTHETICA              | 10027385 | 3 |
| METAL POISONING                     | 10027439 | 3 |
| METASTASES TO SPINE                 | 10027468 | 3 |
| MICROANGIOPATHIC HAEMOLYTIC ANAEMIA | 10027527 | 3 |
| MILIA                               | 10027626 | 3 |
| MYELOID LEUKAEMIA                   | 10028549 | 3 |
| MYOCARDIAL NECROSIS                 | 10028602 | 3 |
| MYOCARDIAL RUPTURE                  | 10028604 | 3 |
| MYOGLOBIN BLOOD INCREASED           | 10028625 | 3 |
| MYRINGOTOMY                         | 10028662 | 3 |
| NAIL PITTING                        | 10028702 | 3 |
| NAIL PSORIASIS                      | 10028703 | 3 |
| NEEDLE TRACK MARKS                  | 10028896 | 3 |
| NEONATAL DISORDER                   | 10028934 | 3 |
| NEPHROCALCINOSIS                    | 10029146 | 3 |
| NEURITIS CRANIAL                    | 10029244 | 3 |
| NEUROSIS                            | 10029333 | 3 |
| NON-ALCOHOLIC FATTY LIVER           | 10029530 | 3 |
| NORMOCHROMIC ANAEMIA                | 10029782 | 3 |
| OESOPHAGEAL VARICES HAEMORRHAGE     | 10030210 | 3 |
| OESOPHAGOSCOPY                      | 10030222 | 3 |
| OMPHALITIS                          | 10030306 | 3 |
| ONYCHOMYCOSIS                       | 10030338 | 3 |
| OPTIC NERVE SHEATH HAEMORRHAGE      | 10030941 | 3 |
| ORGASM ABNORMAL                     | 10031085 | 3 |
| OSTEOMA                             | 10031249 | 3 |

|                                       |          |   |
|---------------------------------------|----------|---|
| PANCREATITIS RELAPSING                | 10033657 | 3 |
| PARAPARESIS                           | 10033885 | 3 |
| PAROTID DUCT OBSTRUCTION              | 10034021 | 3 |
| PAROXYSMAL NOCTURNAL HAEMOGLOBINURIA  | 10034042 | 3 |
| PECTUS EXCAVATUM                      | 10034204 | 3 |
| PELVI-URETERIC OBSTRUCTION            | 10034232 | 3 |
| PERICARDIAL HAEMORRHAGE               | 10034476 | 3 |
| PERIORBITAL HAEMATOMA                 | 10034544 | 3 |
| PH URINE INCREASED                    | 10034795 | 3 |
| PHYSICAL ASSAULT                      | 10034983 | 3 |
| PLACENTAL INSUFFICIENCY               | 10035138 | 3 |
| PLAGUE                                | 10035148 | 3 |
| PLANTAR FASCIAL FIBROMATOSIS          | 10035154 | 3 |
| PNEUMONIA RESPIRATORY SYNCYTIAL VIRAL | 10035732 | 3 |
| PREGNANCY WITH ADVANCED MATERNAL AGE  | 10036582 | 3 |
| PRESBYOPIA                            | 10036628 | 3 |
| PRINZMETAL ANGINA                     | 10036759 | 3 |
| PROTHROMBIN TIME ABNORMAL             | 10037057 | 3 |
| PROTHROMBIN TIME RATIO                | 10037064 | 3 |
| PRURIGO                               | 10037083 | 3 |
| PULMONARY ARTERIAL PRESSURE INCREASED | 10037324 | 3 |
| PULMONARY VASCULITIS                  | 10037457 | 3 |
| PULMONARY VENOUS THROMBOSIS           | 10037459 | 3 |
| PURGING                               | 10037544 | 3 |
| RAPID EYE MOVEMENTS SLEEP ABNORMAL    | 10037841 | 3 |
| RECTAL CANCER                         | 10038038 | 3 |
| RED BLOOD CELL MICROCYTES PRESENT     | 10038163 | 3 |
| RENIN NORMAL                          | 10038561 | 3 |
| RESORPTION BONE INCREASED             | 10038642 | 3 |
| RETINAL ARTERY THROMBOSIS             | 10038831 | 3 |
| RETINAL SCAR                          | 10038895 | 3 |
| RETINAL VASCULAR DISORDER             | 10038901 | 3 |
| RHINOPHYMA                            | 10039098 | 3 |
| ROSEOLA                               | 10039222 | 3 |
| RUBELLA                               | 10039252 | 3 |
| SCHIZOAFFECTIVE DISORDER              | 10039621 | 3 |
| SENSE OF OPPRESSION                   | 10040007 | 3 |
| SMALL CELL LUNG CANCER                | 10041067 | 3 |
| SPECIFIC GRAVITY URINE ABNORMAL       | 10041439 | 3 |
| SPINAL CLAUDICATION                   | 10041539 | 3 |
| SPINAL CORD DRAINAGE                  | 10041551 | 3 |
| SQUAMOUS CELL CARCINOMA OF LUNG       | 10041826 | 3 |
| STERNAL FRACTURE                      | 10042015 | 3 |

|                                      |          |   |
|--------------------------------------|----------|---|
| STRANGULATED HERNIA                  | 10042166 | 3 |
| STROKE VOLUME                        | 10042245 | 3 |
| T-CELL TYPE ACUTE LEUKAEMIA          | 10042987 | 3 |
| TATTOO                               | 10043143 | 3 |
| TEETH BRITTLE                        | 10043173 | 3 |
| THROMBOPHLEBITIS SEPTIC              | 10043593 | 3 |
| THROMBOTIC MICROANGIOPATHY           | 10043645 | 3 |
| THYROIDITIS ACUTE                    | 10043780 | 3 |
| TONGUE HAEMATOMA                     | 10043959 | 3 |
| TOOTH RESORPTION                     | 10044052 | 3 |
| TOPOGRAPHY CORNEAL                   | 10044059 | 3 |
| TOXIC NODULAR GOITRE                 | 10044242 | 3 |
| TOXIC SHOCK SYNDROME                 | 10044248 | 3 |
| TOXOPLASMOSIS                        | 10044272 | 3 |
| TRACHEOBRONCHITIS                    | 10044314 | 3 |
| TRAUMATIC HAEMATOMA                  | 10044522 | 3 |
| TRI-IODOTHYRONINE UPTAKE             | 10044599 | 3 |
| TUBERCULIN TEST POSITIVE             | 10044728 | 3 |
| TYPE IIA HYPERLIPIDAEMIA             | 10045261 | 3 |
| ULNAR NEURITIS                       | 10045380 | 3 |
| ULTRASOUND SKULL                     | 10045441 | 3 |
| UMBILICAL CORD PROLAPSE              | 10045452 | 3 |
| UNEMPLOYMENT                         | 10045520 | 3 |
| URETERIC STENOSIS                    | 10046411 | 3 |
| URETEROSCOPY                         | 10046413 | 3 |
| URINARY TRACT INFECTION ENTEROCOCCAL | 10046572 | 3 |
| URINE OSMOLARITY DECREASED           | 10046653 | 3 |
| URINE OSMOLARITY INCREASED           | 10046654 | 3 |
| URINE SODIUM DECREASED               | 10046671 | 3 |
| UV LIGHT THERAPY                     | 10046850 | 3 |
| VESICoureteric REFLUX                | 10047370 | 3 |
| VIRAL PERICARDITIS                   | 10047472 | 3 |
| VISUAL FIELD TESTS NORMAL            | 10047568 | 3 |
| VITAL CAPACITY                       | 10047579 | 3 |
| VITREOUS DISORDER                    | 10047651 | 3 |
| VITRITIS                             | 10047663 | 3 |
| VOCAL CORD THICKENING                | 10047676 | 3 |
| VULVOVAGINITIS                       | 10047794 | 3 |
| WITHDRAWAL BLEED                     | 10047998 | 3 |
| PREALBUMIN DECREASED                 | 10048436 | 3 |
| BLADDER PROLAPSE                     | 10048475 | 3 |
| ENDOTHELIAL DYSFUNCTION              | 10048554 | 3 |
| SELF-INDUCED VOMITING                | 10048636 | 3 |

|                                              |          |   |
|----------------------------------------------|----------|---|
| LYMPHOCELE                                   | 10048642 | 3 |
| NEUROGENIC BOWEL                             | 10048657 | 3 |
| VENOUS STENOSIS                              | 10048671 | 3 |
| ACUTE GENERALISED EXANTHEMATOUS PUSTULOSIS   | 10048799 | 3 |
| ANAEMIA POSTOPERATIVE                        | 10048861 | 3 |
| HERNIA PAIN                                  | 10049077 | 3 |
| WEIGHT LOSS POOR                             | 10049084 | 3 |
| PATELLOFEMORAL PAIN SYNDROME                 | 10049143 | 3 |
| FRACTURED COCCYX                             | 10049164 | 3 |
| SKIN TURGOR DECREASED                        | 10049428 | 3 |
| PERIPARTUM CARDIOMYOPATHY                    | 10049430 | 3 |
| URINE SODIUM                                 | 10049510 | 3 |
| VAGINAL ABSCESS                              | 10049573 | 3 |
| QUADRIPARESIS                                | 10049680 | 3 |
| BRADYARRHYTHMIA                              | 10049765 | 3 |
| CARDIO-RESPIRATORY DISTRESS                  | 10049874 | 3 |
| NEPHROSTOMY                                  | 10050001 | 3 |
| SPINAL EPIDURAL HAEMATOMA                    | 10050162 | 3 |
| SUBCLAVIAN ARTERY STENOSIS                   | 10050180 | 3 |
| GROIN ABSCESS                                | 10050269 | 3 |
| 5-HYDROXYINDOLACETIC ACID                    | 10050342 | 3 |
| FEAR OF EATING                               | 10050366 | 3 |
| SKIN ULCER HAEMORRHAGE                       | 10050377 | 3 |
| ELECTROCARDIOGRAM T WAVE NORMAL              | 10050381 | 3 |
| HAEMATOSALPINX                               | 10050468 | 3 |
| VULVA CYST                                   | 10050475 | 3 |
| TRACTION                                     | 10050498 | 3 |
| ECHOVIRUS TEST                               | 10050680 | 3 |
| VITAMIN A                                    | 10050712 | 3 |
| BETA 2 MICROGLOBULIN                         | 10050745 | 3 |
| SYNOVIAL FLUID WHITE BLOOD CELLS POSITIVE    | 10050769 | 3 |
| TRANSFERRIN SATURATION INCREASED             | 10050771 | 3 |
| TRACHEAL STENOSIS                            | 10050816 | 3 |
| POSTOPERATIVE THROMBOSIS                     | 10050902 | 3 |
| MYELOCYTE COUNT                              | 10050966 | 3 |
| PLASMA CELL COUNT                            | 10051006 | 3 |
| GASTRIC VARICES                              | 10051012 | 3 |
| CATHETER SITE HAEMORRHAGE                    | 10051099 | 3 |
| FOETAL HEART RATE                            | 10051137 | 3 |
| ELECTROCARDIOGRAM T WAVE AMPLITUDE INCREASED | 10051159 | 3 |
| SWOLLEN TEAR DUCT                            | 10051209 | 3 |
| B-LYMPHOCYTE COUNT DECREASED                 | 10051313 | 3 |
| BILE DUCT STENOSIS                           | 10051341 | 3 |

|                                                       |          |   |
|-------------------------------------------------------|----------|---|
| BILE OUTPUT ABNORMAL                                  | 10051344 | 3 |
| CARBOHYDRATE ANTIGEN 19-9 INCREASED                   | 10051418 | 3 |
| ENTEROCUTANEOUS FISTULA                               | 10051425 | 3 |
| PHLEBOLITH                                            | 10051474 | 3 |
| STRAWBERRY TONGUE                                     | 10051495 | 3 |
| COMPLEMENT FACTOR C2                                  | 10051556 | 3 |
| HAEMATOMA INFECTION                                   | 10051564 | 3 |
| PULMONARY SEPSIS                                      | 10051739 | 3 |
| CYANOPSIA                                             | 10051819 | 3 |
| CITROBACTER INFECTION                                 | 10051904 | 3 |
| TRACHEAL PAIN                                         | 10051955 | 3 |
| METABOLIC SYNDROME                                    | 10052066 | 3 |
| EAR CANAL ERYTHEMA                                    | 10052135 | 3 |
| TYMPANIC MEMBRANE HYPERAEMIA                          | 10052154 | 3 |
| INCLUSION BODY MYOSITIS                               | 10066407 | 3 |
| HAEMATOLOGICAL MALIGNANCY                             | 10066476 | 3 |
| WEANING FAILURE                                       | 10066829 | 3 |
| PAIN THRESHOLD DECREASED                              | 10066956 | 3 |
| ENDOSCOPIC ULTRASOUND ABNORMAL                        | 10067020 | 3 |
| EAR INFECTION BACTERIAL                               | 10067046 | 3 |
| CYTOTOXIC OEDEMA                                      | 10067276 | 3 |
| URINARY CASTS ABSENT                                  | 10067533 | 3 |
| SYSTEMIC LUPUS ERYTHEMATOSUS DISEASE ACTIVITY INDEX A | 10067659 | 3 |
| SPASMODIC DYSPHONIA                                   | 10067672 | 3 |
| VASCULAR GRAFT                                        | 10067740 | 3 |
| PUDENDAL CANAL SYNDROME                               | 10067773 | 3 |
| BABINSKI REFLEX TEST                                  | 10067804 | 3 |
| KERATOMILEUSIS                                        | 10067903 | 3 |
| MICROBIOLOGY TEST NORMAL                              | 10067935 | 3 |
| RENAL CELL CARCINOMA                                  | 10067946 | 3 |
| OROMANDIBULAR DYSTONIA                                | 10067954 | 3 |
| RENAL FUSION ANOMALY                                  | 10068033 | 3 |
| FEMORAL ARTERY EMBOLISM                               | 10068365 | 3 |
| SUPPORTIVE CARE                                       | 10068369 | 3 |
| CERVIX INFLAMMATION                                   | 10068402 | 3 |
| VENOUS OXYGEN SATURATION ABNORMAL                     | 10068428 | 3 |
| VENOUS OXYGEN SATURATION NORMAL                       | 10068474 | 3 |
| VENOUS RECANALISATION                                 | 10068605 | 3 |
| EAR INFECTION FUNGAL                                  | 10068630 | 3 |
| PINEAL GLAND CYST                                     | 10068650 | 3 |
| RESPIRATORY FATIGUE                                   | 10068733 | 3 |
| DECIDUAL CAST                                         | 10068735 | 3 |
| VON WILLEBRAND'S FACTOR ACTIVITY NORMAL               | 10068984 | 3 |

|                                      |          |   |
|--------------------------------------|----------|---|
| HEART SOUNDS                         | 10069168 | 3 |
| PRODUCT LABEL ISSUE                  | 10069289 | 3 |
| PRODUCT PACKAGING QUANTITY ISSUE     | 10069299 | 3 |
| PRODUCT MEASURED POTENCY ISSUE       | 10069325 | 3 |
| DECREASED EYE CONTACT                | 10069633 | 3 |
| DEVICE DIFFICULT TO USE              | 10069853 | 3 |
| DEVICE PHYSICAL PROPERTY ISSUE       | 10069880 | 3 |
| BACILLUS TEST POSITIVE               | 10069961 | 3 |
| LACTOBACILLUS TEST POSITIVE          | 10070000 | 3 |
| STREPTOBACILLUS TEST POSITIVE        | 10070054 | 3 |
| SERRATIA TEST POSITIVE               | 10070128 | 3 |
| BRUCELLA TEST                        | 10070281 | 3 |
| AUTOIMMUNE NEUROPATHY                | 10070439 | 3 |
| VACCINE VIRUS SHEDDING               | 10070583 | 3 |
| DEVICE INFUSION ISSUE                | 10070617 | 3 |
| MUSCLE CONTUSION                     | 10070757 | 3 |
| UPPER RESPIRATORY TRACT IRRITATION   | 10070841 | 3 |
| INFECTION REACTIVATION               | 10070891 | 3 |
| JUVENILE MYOCLONIC EPILEPSY          | 10071082 | 3 |
| BREAST SCAN                          | 10071224 | 3 |
| AORTIC STENT INSERTION               | 10071256 | 3 |
| HEPATITIS B CORE ANTIBODY POSITIVE   | 10071344 | 3 |
| METASTATIC LYMPHOMA                  | 10071541 | 3 |
| RETROPERITONEAL MASS                 | 10071732 | 3 |
| RADIAL NERVE COMPRESSION             | 10071930 | 3 |
| DIALYSIS RELATED COMPLICATION        | 10071946 | 3 |
| FRACTURE PAIN                        | 10072132 | 3 |
| JANUS KINASE 2 MUTATION              | 10072206 | 3 |
| WRITER'S CRAMP                       | 10072249 | 3 |
| PSYCHOGENIC MOVEMENT DISORDER        | 10072376 | 3 |
| SUBSTANCE-INDUCED PSYCHOTIC DISORDER | 10072388 | 3 |
| DROPPED HEAD SYNDROME                | 10072442 | 3 |
| HYDROGEN BREATH TEST NORMAL          | 10072484 | 3 |
| MONONUCLEAR CELL COUNT               | 10072854 | 3 |
| UNINTENTIONAL MEDICAL DEVICE REMOVAL | 10072931 | 3 |
| PROTEIN DEFICIENCY                   | 10072956 | 3 |
| SOMATOTROPIN STIMULATION TEST        | 10073222 | 3 |
| ALVEOLAR LUNG DISEASE                | 10073344 | 3 |
| POST PROCEDURAL CONTUSION            | 10073353 | 3 |
| URINE OSMOLARITY NORMAL              | 10073410 | 3 |
| GENITAL PARAESTHESIA                 | 10073420 | 3 |
| INTERLEUKIN-2 RECEPTOR ASSAY         | 10073452 | 3 |
| HAEMOPHOBIA                          | 10073458 | 3 |



|                                                     |          |   |
|-----------------------------------------------------|----------|---|
| OPTICAL COHERENCE TOMOGRAPHY NORMAL                 | 10073560 | 3 |
| INTENTIONAL UNDERDOSE                               | 10073954 | 3 |
| FORCED VITAL CAPACITY                               | 10074072 | 3 |
| CIRCUMSTANCE OR INFORMATION CAPABLE OF LEADING TO D | 10074266 | 3 |
| CARDIOPULMONARY EXERCISE TEST NORMAL                | 10074358 | 3 |
| GASTROINTESTINAL POLYP HAEMORRHAGE                  | 10074437 | 3 |
| APPENDICOLITH                                       | 10074458 | 3 |
| STOMA SITE HAEMORRHAGE                              | 10074508 | 3 |
| ANORECTAL SWELLING                                  | 10074526 | 3 |
| BEHAVIOURAL THERAPY                                 | 10074786 | 3 |
| DISEASE SUSCEPTIBILITY                              | 10074870 | 3 |
| GRANULOMATOUS DERMATITIS                            | 10074954 | 3 |
| HYPERFERRITINAEMIA                                  | 10075046 | 3 |
| ANTI-MUELLERIAN HORMONE LEVEL DECREASED             | 10075158 | 3 |
| MUCOSAL PAIN                                        | 10075187 | 3 |
| PERINEAL RASH                                       | 10075364 | 3 |
| DISABILITY ASSESSMENT SCALE                         | 10075368 | 3 |
| LUMBOSACRAL PLEXOPATHY                              | 10075478 | 3 |
| ANAL HYPOAESTHESIA                                  | 10075521 | 3 |
| DRY AGE-RELATED MACULAR DEGENERATION                | 10075567 | 3 |
| CD30 EXPRESSION                                     | 10075644 | 3 |
| ADMINISTRATION SITE MOVEMENT IMPAIRMENT             | 10075955 | 3 |
| PERIODIC ACID SCHIFF STAIN                          | 10076035 | 3 |
| MEDICAL DEVICE SITE PAIN                            | 10076133 | 3 |
| VACCINATION SITE ATROPHY                            | 10076155 | 3 |
| VACCINATION SITE CYST                               | 10076158 | 3 |
| CSF VOLUME                                          | 10076216 | 3 |
| ANTI FACTOR V ANTIBODY                              | 10076271 | 3 |
| OPTIC NERVE COMPRESSION                             | 10076302 | 3 |
| CLINOMANIA                                          | 10076760 | 3 |
| ANTI FACTOR VIII ANTIBODY INCREASED                 | 10076777 | 3 |
| JUGULAR VEIN OCCLUSION                              | 10076835 | 3 |
| DOSE CALCULATION ERROR                              | 10076874 | 3 |
| JOINT DEBRIDEMENT                                   | 10076971 | 3 |
| ANTIENDOMYSIAL ANTIBODY TEST                        | 10076977 | 3 |
| VASCULAR STENT OCCLUSION                            | 10077143 | 3 |
| INTENSIVE CARE UNIT ACQUIRED WEAKNESS               | 10077255 | 3 |
| HEREDITARY MOTOR AND SENSORY NEUROPATHY             | 10077306 | 3 |
| HEPATOBIILIARY SCAN NORMAL                          | 10077444 | 3 |
| IMPAIRED ABILITY TO USE MACHINERY                   | 10077474 | 3 |
| OROPHARYNGEAL COBBLE STONE MUCOSA                   | 10077523 | 3 |
| MEDICAL PROCEDURE                                   | 10077673 | 3 |
| PSEUDOMONAS TEST                                    | 10077708 | 3 |

|                                                   |          |   |
|---------------------------------------------------|----------|---|
| PERINEAL DISORDER                                 | 10077853 | 3 |
| EOSINOPHILIC GRANULOMATOSIS WITH POLYANGIITIS     | 10078117 | 3 |
| GENITAL ULCER SYNDROME                            | 10078121 | 3 |
| RETAINED PLACENTA OPERATION                       | 10078243 | 3 |
| TONSILLAR EXUDATE                                 | 10078257 | 3 |
| INCORRECT DISPOSAL OF PRODUCT                     | 10078390 | 3 |
| SKIN CULTURE POSITIVE                             | 10078402 | 3 |
| TUMEFACTIVE MULTIPLE SCLEROSIS                    | 10078556 | 3 |
| INAPPROPRIATE RELEASE OF PRODUCT FOR DISTRIBUTION | 10078608 | 3 |
| HERPES VIRUS TEST ABNORMAL                        | 10078969 | 3 |
| COGNITIVE LINGUISTIC DEFICIT                      | 10078970 | 3 |
| WALL MOTION SCORE INDEX NORMAL                    | 10079015 | 3 |
| SUBCLAVIAN VEIN OCCLUSION                         | 10079164 | 3 |
| ADMINISTRATION SITE INDENTATION                   | 10079278 | 3 |
| HAIR GROWTH RATE ABNORMAL                         | 10079335 | 3 |
| ACHENBACH SYNDROME                                | 10079562 | 3 |
| DEPENDENCE ON OXYGEN THERAPY                      | 10079637 | 3 |
| DROOPING SHOULDER SYNDROME                        | 10079746 | 3 |
| SALMONELLA TEST                                   | 10079854 | 3 |
| ALCOHOL USE DISORDER                              | 10080021 | 3 |
| SKIN LESION REMOVAL                               | 10080131 | 3 |
| FEAR-RELATED AVOIDANCE OF ACTIVITIES              | 10080136 | 3 |
| PRIMARY BILIARY CHOLANGITIS                       | 10080429 | 3 |
| DRUG DOSE OMISSION BY DEVICE                      | 10080648 | 3 |
| TERM BABY                                         | 10080681 | 3 |
| VASCULAR DEVICE INFECTION                         | 10080714 | 3 |
| TISSUE IRRITATION                                 | 10080906 | 3 |
| ARTIFICIAL INSEMINATION                           | 10080948 | 3 |
| NECK DISSECTION                                   | 10081204 | 3 |
| STEM CELL THERAPY                                 | 10081224 | 3 |
| VESSEL HARVESTING                                 | 10081419 | 3 |
| ELECTROCARDIOGRAM PR SEGMENT ELEVATION            | 10081494 | 3 |
| GASTROINTESTINAL SCARRING                         | 10081656 | 3 |
| CRAMP-FASCICULATION SYNDROME                      | 10081974 | 3 |
| TARGET SKIN LESION                                | 10081998 | 3 |
| VOGT-KOYANAGI-HARADA DISEASE                      | 10082001 | 3 |
| GASTROINTESTINAL DECOMPRESSION                    | 10082064 | 3 |
| HEART RATE VARIABILITY INCREASED                  | 10082110 | 3 |
| INFANT IRRITABILITY                               | 10082189 | 3 |
| CANCER FATIGUE                                    | 10082239 | 3 |
| INTERNAL CAROTID ARTERY DEFORMITY                 | 10082308 | 3 |
| OSTOMY BAG PLACEMENT                              | 10082415 | 3 |
| BREAST SCAN ABNORMAL                              | 10082620 | 3 |

|                                             |          |   |
|---------------------------------------------|----------|---|
| PERIORBITAL IRRITATION                      | 10082774 | 3 |
| MUSCLE STRENGTH NORMAL                      | 10082796 | 3 |
| MONOCLONAL IMMUNOGLOBULIN INCREASED         | 10082825 | 3 |
| CHRONIC ACTIVE EPSTEIN-BARR VIRUS INFECTION | 10082848 | 3 |
| FEMALE REPRODUCTIVE TRACT DISORDER          | 10082971 | 3 |
| GASTROINTESTINAL TRACT BIOPSY               | 10082977 | 3 |
| FLUORESCENCE ANGIOGRAM NORMAL               | 10083088 | 3 |
| MAGNETIC RESONANCE IMAGING RENAL            | 10083131 | 3 |
| VACUUM ASPIRATION                           | 10083276 | 3 |
| RETICULAR CELL COUNT                        | 10083485 | 3 |
| BLOOD BETA-D-GLUCAN NEGATIVE                | 10083489 | 3 |
| FOREIGN BODY INGESTION                      | 10083512 | 3 |
| IRIS DISCOLOURATION                         | 10083516 | 3 |
| PRECANCEROUS LESION OF DIGESTIVE TRACT      | 10083666 | 3 |
| ALPHA-1 ANTITRYPSIN DEFICIENCY              | 10083869 | 3 |
| PLEURAL FLUID ANALYSIS ABNORMAL             | 10083928 | 3 |
| REVASCULARISATION PROCEDURE                 | 10084091 | 3 |
| AXONAL AND DEMYELINATING POLYNEUROPATHY     | 10084153 | 3 |
| LOSS OF THERAPEUTIC RESPONSE                | 10084221 | 3 |
| OPTIC PERINEURITIS                          | 10084264 | 3 |
| FOETAL CARDIAC ARREST                       | 10084280 | 3 |
| GARDNERELLA TEST NEGATIVE                   | 10084362 | 3 |
| PRODUCT ADMINISTERED BY WRONG PERSON        | 10084371 | 3 |
| MALARIA ANTIGEN TEST                        | 10084385 | 3 |
| AEROCOCCUS URINAE INFECTION                 | 10084826 | 3 |
| NOROVIRUS INFECTION                         | 10085018 | 3 |
| COMPUTERISED TOMOGRAM OF GALLBLADDER        | 10085278 | 3 |
| URINARY OCCULT BLOOD POSITIVE               | 10052287 | 3 |
| MYOCARDIAL BRIDGING                         | 10052289 | 3 |
| POSTICTAL PARALYSIS                         | 10052469 | 3 |
| ABDOMINAL REBOUND TENDERNESS                | 10052489 | 3 |
| TINEL'S SIGN                                | 10052492 | 3 |
| OESOPHAGEAL MOTILITY TEST                   | 10053061 | 3 |
| POST PROCEDURAL DRAINAGE                    | 10053175 | 3 |
| BIOPSY SMALL INTESTINE                      | 10053281 | 3 |
| BIOPSY SMALL INTESTINE NORMAL               | 10053282 | 3 |
| EYE IRRIGATION                              | 10053300 | 3 |
| SPINAL CORD OPERATION                       | 10053348 | 3 |
| BLOOD PRESSURE ORTHOSTATIC NORMAL           | 10053353 | 3 |
| BLOOD PRESSURE ORTHOSTATIC DECREASED        | 10053356 | 3 |
| THERMOMETRY                                 | 10053359 | 3 |
| BRAIN NATRIURETIC PEPTIDE DECREASED         | 10053407 | 3 |
| APNOEA TEST                                 | 10053464 | 3 |

|                                       |          |   |
|---------------------------------------|----------|---|
| SURGICAL STAPLING                     | 10053465 | 3 |
| GROUP B STREPTOCOCCUS NEONATAL SEPSIS | 10053588 | 3 |
| CEREBELLAR ARTERY OCCLUSION           | 10053633 | 3 |
| ACQUIRED HAEMOPHILIA                  | 10053745 | 3 |
| GROWTH RETARDATION                    | 10053759 | 3 |
| EOSINOPHILIC CELLULITIS               | 10053776 | 3 |
| BLOOD TESTOSTERONE FREE               | 10053787 | 3 |
| CSF WHITE BLOOD CELL COUNT DECREASED  | 10053806 | 3 |
| GIANOTTI-CROSTI SYNDROME              | 10053842 | 3 |
| RADIAL PULSE DECREASED                | 10053903 | 3 |
| RADIAL PULSE INCREASED                | 10053904 | 3 |
| OESTROGEN RECEPTOR ASSAY              | 10054053 | 3 |
| LARYNGEAL DISCOMFORT                  | 10054115 | 3 |
| BREAST PROSTHESIS REMOVAL             | 10054831 | 3 |
| CORNEAL TRANSPLANT                    | 10054846 | 3 |
| INFLAMMATION OF WOUND                 | 10054923 | 3 |
| PELVIC HAEMATOMA                      | 10054974 | 3 |
| URINE PHOSPHORUS NORMAL               | 10055066 | 3 |
| VARICES OESOPHAGEAL                   | 10056091 | 3 |
| FEMALE STERILISATION                  | 10056199 | 3 |
| ADHESIOLYSIS                          | 10056269 | 3 |
| EMPHYSEMATOUS CYSTITIS                | 10056351 | 3 |
| PARKINSONIAN REST TREMOR              | 10056437 | 3 |
| CORNEAL IRRITATION                    | 10056476 | 3 |
| HEPATIC INFECTION                     | 10056522 | 3 |
| URINE BILIRUBIN DECREASED             | 10056614 | 3 |
| BRONCHIAL OEDEMA                      | 10056695 | 3 |
| VARICOPHLEBITIS                       | 10056717 | 3 |
| OTIC EXAMINATION NORMAL               | 10056833 | 3 |
| DEVICE FAILURE                        | 10056871 | 3 |
| ALCOHOLIC PANCREATITIS                | 10056977 | 3 |
| URINE HOMOCYSTINE                     | 10057159 | 3 |
| SCLERAL OEDEMA                        | 10057431 | 3 |
| TONSILLAR HAEMORRHAGE                 | 10057450 | 3 |
| TONSILLAR CYST                        | 10057451 | 3 |
| CARDIAC PROCEDURE COMPLICATION        | 10057461 | 3 |
| PERIPHERAL ARTERY ANEURYSM            | 10057521 | 3 |
| SPINAL MYELOGRAM NORMAL               | 10057564 | 3 |
| FRACTURE REDUCTION                    | 10057609 | 3 |
| PERIPHERAL NERVE DECOMPRESSION        | 10057610 | 3 |
| COLON INJURY                          | 10057669 | 3 |
| TRANSPLANT                            | 10057677 | 3 |
| JOINT ARTHROPLASTY                    | 10057681 | 3 |

|                                               |          |   |
|-----------------------------------------------|----------|---|
| UPPER RESPIRATORY TRACT INFECTION BACTERIAL   | 10057868 | 3 |
| HEAD LAG                                      | 10057870 | 3 |
| CHRONIC CUTANEOUS LUPUS ERYTHEMATOSUS         | 10057929 | 3 |
| BLADDER MASS                                  | 10058320 | 3 |
| ANTI-PLATELET ANTIBODY POSITIVE               | 10058529 | 3 |
| SEROSITIS                                     | 10058556 | 3 |
| LARYNX IRRITATION                             | 10058670 | 3 |
| VITAMIN K                                     | 10058768 | 3 |
| VASODILATION PROCEDURE                        | 10058794 | 3 |
| PULMONARY NECROSIS                            | 10058824 | 3 |
| ENTERITIS INFECTIOUS                          | 10058839 | 3 |
| BACTEROIDES BACTERAEMIA                       | 10058853 | 3 |
| CYTOMEGALOVIRUS VIRAEMIA                      | 10058854 | 3 |
| VIRAEMIA                                      | 10058874 | 3 |
| GENERAL PHYSICAL CONDITION NORMAL             | 10058910 | 3 |
| APPLICATION SITE DISCOLOURATION               | 10059005 | 3 |
| DIALYSIS DEVICE INSERTION                     | 10059015 | 3 |
| VENTRICULAR DYSFUNCTION                       | 10059056 | 3 |
| SUTURE RELATED COMPLICATION                   | 10059059 | 3 |
| STOMA SITE RASH                               | 10059071 | 3 |
| STOMA SITE IRRITATION                         | 10059072 | 3 |
| CEREBRAL VASOCONSTRICTION                     | 10059109 | 3 |
| BAND NEUTROPHIL PERCENTAGE INCREASED          | 10059129 | 3 |
| VENTRICULAR DYSKINESIA                        | 10059162 | 3 |
| OXYGEN CONSUMPTION INCREASED                  | 10059168 | 3 |
| ANOGENITAL WARTS                              | 10059313 | 3 |
| MITOGEN STIMULATION TEST                      | 10059463 | 3 |
| INTRACRANIAL HAEMATOMA                        | 10059491 | 3 |
| NON-SMALL CELL LUNG CANCER METASTATIC         | 10059515 | 3 |
| METHYLMALONIC ACIDURIA                        | 10059521 | 3 |
| SYNOVIAL FLUID ANALYSIS                       | 10059534 | 3 |
| BETA GLOBULIN                                 | 10059561 | 3 |
| URINE BARBITURATES                            | 10059578 | 3 |
| PHLEBOTOMY                                    | 10059648 | 3 |
| SEX HORMONE BINDING GLOBULIN                  | 10059654 | 3 |
| SPUTUM RETENTION                              | 10059685 | 3 |
| BLOOD HEAVY METAL TEST                        | 10059692 | 3 |
| GLUCOSE-6-PHOSPHATE DEHYDROGENASE             | 10059900 | 3 |
| RETICULOCYTE PERCENTAGE NORMAL                | 10059918 | 3 |
| RED BLOOD CELL MICROCYTES                     | 10060122 | 3 |
| ANTINEUTROPHIL CYTOPLASMIC ANTIBODY INCREASED | 10060138 | 3 |
| PULMONARY ARTERIAL PRESSURE                   | 10060196 | 3 |
| ANTIDEPRESSANT DRUG LEVEL                     | 10060312 | 3 |

|                                             |          |   |
|---------------------------------------------|----------|---|
| MESENTERIC HAEMORRHAGE                      | 10060717 | 3 |
| DIABETIC FOOT                               | 10060734 | 3 |
| PLASMINOGEN                                 | 10060824 | 3 |
| POST LUMBAR PUNCTURE SYNDROME               | 10060854 | 3 |
| SALIVARY GLAND MUCOCOELE                    | 10060870 | 3 |
| ABDOMINAL SYMPTOM                           | 10060926 | 3 |
| ANAESTHETIC COMPLICATION                    | 10060938 | 3 |
| ARTERIAL HAEMORRHAGE                        | 10060964 | 3 |
| CHLAMYDIAL INFECTION                        | 10061041 | 3 |
| COMPLEMENT FACTOR DECREASED                 | 10061048 | 3 |
| COMPLEMENT FACTOR INCREASED                 | 10061049 | 3 |
| CONGENITAL UTERINE ANOMALY                  | 10061079 | 3 |
| COOMBS TEST NEGATIVE                        | 10061089 | 3 |
| DIABETIC COMPLICATION                       | 10061104 | 3 |
| DNA ANTIBODY POSITIVE                       | 10061110 | 3 |
| EOSINOPHIL COUNT ABNORMAL                   | 10061125 | 3 |
| MALOCCLUSION                                | 10061274 | 3 |
| MINERAL DEFICIENCY                          | 10061291 | 3 |
| NASAL MUCOSAL DISORDER                      | 10061305 | 3 |
| PERIPHERAL NERVE OPERATION                  | 10061341 | 3 |
| PERITONEAL DISORDER                         | 10061343 | 3 |
| CEREBRAL CYST                               | 10061445 | 3 |
| CENTRAL NERVOUS SYSTEM FUNCTION TEST NORMAL | 10061464 | 3 |
| POSTOPERATIVE WOUND COMPLICATION            | 10061468 | 3 |
| SCAN MYOCARDIAL PERFUSION ABNORMAL          | 10061501 | 3 |
| SERRATIA INFECTION                          | 10061512 | 3 |
| SENSORY LEVEL                               | 10061558 | 3 |
| X-RAY GASTROINTESTINAL TRACT                | 10061583 | 3 |
| ADRENALECTOMY                               | 10061622 | 3 |
| ARTHRODESIS                                 | 10061683 | 3 |
| BLOOD HEAVY METAL NORMAL                    | 10061719 | 3 |
| CARDIAC ELECTROPHYSIOLOGIC STUDY ABNORMAL   | 10061808 | 3 |
| DIABETIC NEPHROPATHY                        | 10061835 | 3 |
| ELECTROPHORESIS NORMAL                      | 10061836 | 3 |
| FAT NECROSIS                                | 10061857 | 3 |
| ENDOSCOPY GASTROINTESTINAL ABNORMAL         | 10061860 | 3 |
| NOSE DEFORMITY                              | 10061875 | 3 |
| PANCREATIC NEOPLASM                         | 10061902 | 3 |
| CRANIAL NERVE PARALYSIS                     | 10061908 | 3 |
| LYMPH NODES SCAN ABNORMAL                   | 10061949 | 3 |
| GASTRIC BYPASS                              | 10061966 | 3 |
| LASER THERAPY                               | 10062035 | 3 |
| LEUKOPLAKIA                                 | 10062037 | 3 |

|                                            |          |   |
|--------------------------------------------|----------|---|
| LYMPHOCYTIC INFILTRATION                   | 10062049 | 3 |
| MANIPULATION                               | 10062053 | 3 |
| RED BLOOD CELL ELLIPTOCYTES PRESENT        | 10062055 | 3 |
| PERICHONDritis                             | 10062067 | 3 |
| PERITONITIS BACTERIAL                      | 10062070 | 3 |
| STREPTOBACILLUS INFECTION                  | 10062118 | 3 |
| STOMACH SCAN                               | 10062144 | 3 |
| SERONEGATIVE ARTHRITIS                     | 10062164 | 3 |
| CATECHOLAMINES URINE                       | 10062277 | 3 |
| HABITUAL ABORTION                          | 10062935 | 3 |
| ANTI-GLOMERULAR BASEMENT MEMBRANE ANTIBODY | 10063038 | 3 |
| BRONCHOALVEOLAR LAVAGE NORMAL              | 10063077 | 3 |
| BASILAR ARTERY THROMBOSIS                  | 10063093 | 3 |
| CHORIORETINOPATHY                          | 10063118 | 3 |
| AMPHETAMINES NEGATIVE                      | 10063223 | 3 |
| AMINO ACID LEVEL INCREASED                 | 10063259 | 3 |
| HISTAMINE NORMAL                           | 10063303 | 3 |
| ARTERIOSCLEROTIC RETINOPATHY               | 10063452 | 3 |
| MEDICATION DILUTION                        | 10063482 | 3 |
| STEM CELL TRANSPLANT                       | 10063581 | 3 |
| EXPOSURE TO NOISE                          | 10063602 | 3 |
| AVERSION                                   | 10063659 | 3 |
| PELVIC HAEMORRHAGE                         | 10063678 | 3 |
| PHOTOTHERAPY                               | 10063925 | 3 |
| VASCULAR STENT THROMBOSIS                  | 10063934 | 3 |
| NIPPLE INFLAMMATION                        | 10064043 | 3 |
| PASSIVE SMOKING                            | 10064066 | 3 |
| FAMILIAL RISK FACTOR                       | 10064117 | 3 |
| BETA 2 GLOBULIN                            | 10064139 | 3 |
| BONE FRAGMENTATION                         | 10064211 | 3 |
| SMEAR VAGINAL ABNORMAL                     | 10064247 | 3 |
| SPLENIC GRANULOMA                          | 10064249 | 3 |
| OESOPHAGEAL OEDEMA                         | 10064342 | 3 |
| COMPLICATION OF DEVICE INSERTION           | 10064538 | 3 |
| TOTAL BILE ACIDS INCREASED                 | 10064558 | 3 |
| PLACENTAL INFARCTION                       | 10064620 | 3 |
| DACTYLITIS                                 | 10064769 | 3 |
| ASTHMATIC CRISIS                           | 10064823 | 3 |
| WAIST CIRCUMFERENCE INCREASED              | 10064863 | 3 |
| CERVICOGENIC HEADACHE                      | 10064888 | 3 |
| HIGH FREQUENCY ABLATION                    | 10064979 | 3 |
| CYSTITIS BACTERIAL                         | 10065198 | 3 |
| ORAL VIRAL INFECTION                       | 10065234 | 3 |

|                                                   |          |   |
|---------------------------------------------------|----------|---|
| HEPATIC CALCIFICATION                             | 10065274 | 3 |
| SPONTANEOUS HAEMATOMA                             | 10065304 | 3 |
| POST PROCEDURAL HYPOTHYROIDISM                    | 10065306 | 3 |
| MULTIFOCAL MOTOR NEUROPATHY                       | 10065579 | 3 |
| DERMATILLOMANIA                                   | 10065701 | 3 |
| BIOPSY PLACENTA                                   | 10065916 | 3 |
| AUTOIMMUNE INNER EAR DISEASE                      | 10065996 | 3 |
| VACCINATION SITE PALLOR                           | 10066045 | 3 |
| CAROTID ARTERY STENT INSERTION                    | 10066102 | 3 |
| AVULSION FRACTURE                                 | 10066184 | 3 |
| VISCERAL CONGESTION                               | 10066397 | 3 |
| CARDIAC THERAPEUTIC PROCEDURE                     | 10085366 | 3 |
| INAPPROPRIATE SCHEDULE OF PRODUCT DISCONTINUATION | 10085426 | 3 |
| BLOOD LOSS ASSESSMENT                             | 10085463 | 3 |
| SUPRACLAVICULAR FOSSA PAIN                        | 10085665 | 3 |
| INDETERMINATE INVESTIGATION RESULT                | 10085741 | 3 |
| CAMPYLOBACTER TEST                                | 10086167 | 3 |
| HEAD IMPULSE TEST                                 | 10086191 | 3 |
| SIGMOID SINUS THROMBOSIS                          | 10087208 | 3 |
| JOINT IMPINGEMENT                                 | 10087218 | 3 |
| ADENOIDAL HYPERTROPHY                             | 10001229 | 2 |
| ADIPOSIS DOLOROSA                                 | 10001294 | 2 |
| ADJUSTMENT DISORDER WITH DEPRESSED MOOD           | 10001297 | 2 |
| ADRENERGIC SYNDROME                               | 10001387 | 2 |
| ALCOHOL INTERACTION                               | 10001597 | 2 |
| ALPHA 1 FOETOPROTEIN AMNIOTIC FLUID               | 10001775 | 2 |
| ALPHA 1 GLOBULIN NORMAL                           | 10001789 | 2 |
| ALPHA 2 GLOBULIN                                  | 10001792 | 2 |
| ALPHA 2 GLOBULIN INCREASED                        | 10001796 | 2 |
| ALPHA-1 ANTI-TRYPSIN                              | 10001803 | 2 |
| ANAEMIA FOLATE DEFICIENCY                         | 10002043 | 2 |
| ANAPHYLAXIS TREATMENT                             | 10002222 | 2 |
| ANENCEPHALY                                       | 10002320 | 2 |
| ANGIOGRAM RETINA ABNORMAL                         | 10002444 | 2 |
| ANGIOSARCOMA                                      | 10002476 | 2 |
| ANION GAP ABNORMAL                                | 10002523 | 2 |
| ANOREXIA NERVOSA                                  | 10002649 | 2 |
| ANTEROGRADE AMNESIA                               | 10002711 | 2 |
| ANTICIPATORY ANXIETY                              | 10002758 | 2 |
| ANTITHROMBIN III DEFICIENCY                       | 10002832 | 2 |
| AORTIC ANEURYSM REPAIR                            | 10002885 | 2 |
| AORTIC ANEURYSM RUPTURE                           | 10002886 | 2 |
| AORTIC EMBOLUS                                    | 10002897 | 2 |



|                                   |          |   |
|-----------------------------------|----------|---|
| APLASIA PURE RED CELL             | 10002965 | 2 |
| APPLICATION SITE RASH             | 10003054 | 2 |
| ARRESTED LABOUR                   | 10003118 | 2 |
| ARTERIOVENOUS FISTULA THROMBOSIS  | 10003192 | 2 |
| ARTERITIS                         | 10003230 | 2 |
| ARTHRITIS ENTEROPATHIC            | 10003253 | 2 |
| ASPIRATION BONE MARROW ABNORMAL   | 10003506 | 2 |
| ASPIRATION BURSA                  | 10003508 | 2 |
| ASPIRATION JOINT NORMAL           | 10003519 | 2 |
| ATONIC URINARY BLADDER            | 10003629 | 2 |
| B-CELL SMALL LYMPHOCYTIC LYMPHOMA | 10003908 | 2 |
| BASILAR ARTERY STENOSIS           | 10004163 | 2 |
| BENIGN NEOPLASM OF CERVIX UTERI   | 10004312 | 2 |
| BENIGN OVARIAN TUMOUR             | 10004433 | 2 |
| BINGE EATING                      | 10004716 | 2 |
| BIOPSY ABDOMINAL WALL NORMAL      | 10004723 | 2 |
| BIOPSY BRAIN NORMAL               | 10004743 | 2 |
| BIOPSY BRONCHUS                   | 10004747 | 2 |
| BIOPSY CERVIX ABNORMAL            | 10004754 | 2 |
| BIOPSY LUNG NORMAL                | 10004796 | 2 |
| BIOPSY OESOPHAGUS ABNORMAL        | 10004809 | 2 |
| BIOPSY OESOPHAGUS NORMAL          | 10004810 | 2 |
| BIOPSY RECTUM                     | 10004859 | 2 |
| BIOPSY SCLERA ABNORMAL            | 10004869 | 2 |
| BIPOLAR II DISORDER               | 10004940 | 2 |
| BLADDER CATHETER REMOVAL          | 10005025 | 2 |
| BLEEDING ANOVULATORY              | 10005104 | 2 |
| BLEEDING TIME                     | 10005136 | 2 |
| BLEEDING VARICOSE VEIN            | 10005144 | 2 |
| BLINDNESS CORTICAL                | 10005177 | 2 |
| BLOOD ARSENIC NORMAL              | 10005343 | 2 |
| BLOOD BICARBONATE ABNORMAL        | 10005358 | 2 |
| BLOOD CAFFEINE DECREASED          | 10005383 | 2 |
| BLOOD CHROMIUM INCREASED          | 10005435 | 2 |
| BLOOD CORTICOTROPHIN ABNORMAL     | 10005451 | 2 |
| BLOOD CORTICOTROPHIN INCREASED    | 10005453 | 2 |
| BLOOD FIBRINOGEN ABNORMAL         | 10005518 | 2 |
| BLOOD FOLATE ABNORMAL             | 10005525 | 2 |
| BLOOD INSULIN NORMAL              | 10005615 | 2 |
| BLOOD OESTROGEN ABNORMAL          | 10005685 | 2 |
| BLOOD PRESSURE SYSTOLIC NORMAL    | 10005764 | 2 |
| BLOOD PROLACTIN ABNORMAL          | 10005778 | 2 |
| BLOOD THROMBOPLASTIN DECREASED    | 10005826 | 2 |

|                                     |          |   |
|-------------------------------------|----------|---|
| BLOOD TRIGLYCERIDES DECREASED       | 10005838 | 2 |
| BLOOD ZINC ABNORMAL                 | 10005865 | 2 |
| BONE GRAFT                          | 10005971 | 2 |
| BONE NEOPLASM                       | 10005995 | 2 |
| BREAST CANCER IN SITU               | 10006189 | 2 |
| BREAST FIBROSIS                     | 10006253 | 2 |
| BRONCHOGRAM ABNORMAL                | 10006466 | 2 |
| BUNDLE BRANCH BLOCK BILATERAL       | 10006579 | 2 |
| CARBOXYHAEMOGLOBIN NORMAL           | 10007245 | 2 |
| CARDIAC AMYLOIDOSIS                 | 10007509 | 2 |
| CARDIOVASCULAR FUNCTION TEST NORMAL | 10007652 | 2 |
| CAREGIVER                           | 10007664 | 2 |
| CATARRH                             | 10007774 | 2 |
| CELLULITIS ORBITAL                  | 10007918 | 2 |
| CENTRAL NERVOUS SYSTEM LYMPHOMA     | 10007953 | 2 |
| CEREBELLAR ATAXIA                   | 10008025 | 2 |
| CERULOPLASMIN NORMAL                | 10008221 | 2 |
| CERVICAL INCOMPETENCE               | 10008267 | 2 |
| CERVICITIS                          | 10008323 | 2 |
| CERVICOBRACHIAL SYNDROME            | 10008334 | 2 |
| CERVIX NEOPLASM                     | 10008354 | 2 |
| CHOLANGITIS ACUTE                   | 10008605 | 2 |
| CHOLESTEATOMA                       | 10008642 | 2 |
| CHORDAE TENDINAE RUPTURE            | 10008745 | 2 |
| CHOROIDITIS                         | 10008792 | 2 |
| CHROMOSOME ANALYSIS ABNORMAL        | 10008817 | 2 |
| CHRONIC HEPATITIS C                 | 10008912 | 2 |
| CLEFT PALATE                        | 10009269 | 2 |
| COAGULATION FACTOR INCREASED        | 10009743 | 2 |
| COAGULATION FACTOR IX LEVEL         | 10009744 | 2 |
| COAGULATION FACTOR VII LEVEL        | 10009759 | 2 |
| COAGULATION TIME ABNORMAL           | 10009791 | 2 |
| COAGULATION TIME SHORTENED          | 10009800 | 2 |
| COELIAC ARTERY COMPRESSION SYNDROME | 10009838 | 2 |
| COLECTOMY TOTAL                     | 10009879 | 2 |
| COLOSTOMY CLOSURE                   | 10010045 | 2 |
| COMBINED IMMUNODEFICIENCY           | 10010099 | 2 |
| CONFABULATION                       | 10010297 | 2 |
| CONGENITAL ANOMALY                  | 10010356 | 2 |
| CONVALESCENT                        | 10010888 | 2 |
| COOMBS NEGATIVE HAEMOLYTIC ANAEMIA  | 10010940 | 2 |
| CORNEAL DYSTROPHY                   | 10011005 | 2 |
| CORNEAL EPITHELIUM DEFECT           | 10011010 | 2 |

|                                         |          |   |
|-----------------------------------------|----------|---|
| CORNEAL SCAR                            | 10011044 | 2 |
| CORONARY ARTERY EMBOLISM                | 10011084 | 2 |
| CORONARY OSTIAL STENOSIS                | 10011105 | 2 |
| CORTISOL ABNORMAL                       | 10011196 | 2 |
| CORTISOL FREE URINE                     | 10011199 | 2 |
| CRANIAL NERVE PALSIES MULTIPLE          | 10011314 | 2 |
| CREATINE URINE INCREASED                | 10011356 | 2 |
| CREST SYNDROME                          | 10011380 | 2 |
| CROSSMATCH                              | 10011412 | 2 |
| CRYOGLOBULINAEMIA                       | 10011474 | 2 |
| CSF CULTURE POSITIVE                    | 10011529 | 2 |
| CSF GLUCOSE ABNORMAL                    | 10011536 | 2 |
| CSF NEUTROPHIL COUNT                    | 10011555 | 2 |
| CSF PROTEIN ABNORMAL                    | 10011573 | 2 |
| CSF PROTEIN DECREASED                   | 10011574 | 2 |
| CULTURE CERVIX                          | 10011621 | 2 |
| CULTURE CERVIX NEGATIVE                 | 10011622 | 2 |
| CUTANEOUS T-CELL LYMPHOMA               | 10011677 | 2 |
| CYSTIC FIBROSIS                         | 10011762 | 2 |
| CYSTITIS ESCHERICHIA                    | 10011790 | 2 |
| CYSTOCELE                               | 10011803 | 2 |
| DEJA VU                                 | 10012177 | 2 |
| DERMATITIS HERPETIFORMIS                | 10012468 | 2 |
| DERMOID CYST                            | 10012522 | 2 |
| DIABETIC HYPEROSMOLAR COMA              | 10012669 | 2 |
| DIAPHRAGMATIC HERNIA                    | 10012713 | 2 |
| DIARRHOEA INFECTIOUS                    | 10012742 | 2 |
| DILATATION ATRIAL                       | 10013002 | 2 |
| DIRECTIONAL DOPPLER FLOW TESTS ABNORMAL | 10013048 | 2 |
| DRUG LEVEL INCREASED                    | 10013722 | 2 |
| DRUG WITHDRAWAL SYNDROME                | 10013754 | 2 |
| DUMPING SYNDROME                        | 10013810 | 2 |
| DUODENAL ULCER HAEMORRHAGE              | 10013839 | 2 |
| EARLY RETIREMENT                        | 10014055 | 2 |
| ECZEMA ASTEATOTIC                       | 10014190 | 2 |
| ECZEMA INFECTED                         | 10014199 | 2 |
| EJECTION FRACTION ABNORMAL              | 10014331 | 2 |
| ELDERLY                                 | 10014348 | 2 |
| ELECTROPHORESIS ABNORMAL                | 10014459 | 2 |
| ELECTROPHORESIS PROTEIN ABNORMAL        | 10014468 | 2 |
| ENAMEL ANOMALY                          | 10014576 | 2 |
| ENDOMETRIAL ADENOCARCINOMA              | 10014720 | 2 |
| ENDOMETRIAL CANCER STAGE I              | 10014738 | 2 |

|                                               |          |   |
|-----------------------------------------------|----------|---|
| ENLARGED CLITORIS                             | 10014838 | 2 |
| EOSINOPHILIC MYOCARDITIS                      | 10014961 | 2 |
| EOSINOPHILIC PNEUMONIA                        | 10014962 | 2 |
| EPIDURAL ANAESTHESIA                          | 10015011 | 2 |
| EPILEPTIC AURA                                | 10015049 | 2 |
| EPISIOTOMY                                    | 10015087 | 2 |
| ERYTHRODERMIC PSORIASIS                       | 10015278 | 2 |
| EVACUATION OF RETAINED PRODUCTS OF CONCEPTION | 10015550 | 2 |
| EWING'S SARCOMA                               | 10015560 | 2 |
| EXERCISE ADEQUATE                             | 10015636 | 2 |
| EXTERNAL EAR CELLULITIS                       | 10015729 | 2 |
| EYE EXCISION                                  | 10015923 | 2 |
| EYE INFECTION STAPHYLOCOCCAL                  | 10015937 | 2 |
| FACTOR VIII DEFICIENCY                        | 10016080 | 2 |
| FALSE LABOUR                                  | 10016194 | 2 |
| FAMILIAL MEDITERRANEAN FEVER                  | 10016207 | 2 |
| FERTILITY INCREASED                           | 10016467 | 2 |
| FIBRIN                                        | 10016574 | 2 |
| FIBRIN DEGRADATION PRODUCTS NORMAL            | 10016589 | 2 |
| FINGER AMPUTATION                             | 10016678 | 2 |
| FLASHBACK                                     | 10016754 | 2 |
| FOETAL ARRHYTHMIA                             | 10016847 | 2 |
| FOLATE DEFICIENCY                             | 10016880 | 2 |
| FORCED EXPIRATORY VOLUME DECREASED            | 10016987 | 2 |
| FOREIGN BODY IN EYE                           | 10017012 | 2 |
| GAIT SPASTIC                                  | 10017585 | 2 |
| GASTRIC POLYPS                                | 10017817 | 2 |
| GASTRIC ULCER PERFORATION                     | 10017835 | 2 |
| GASTROINTESTINAL FISTULA                      | 10017877 | 2 |
| GASTROINTESTINAL ARTERIOVENOUS MALFORMATION   | 10017932 | 2 |
| GIANT PAPILLARY CONJUNCTIVITIS                | 10018258 | 2 |
| GLIOBLASTOMA MULTIFORME                       | 10018337 | 2 |
| GLOSSECTOMY                                   | 10018383 | 2 |
| GLYCOSURIA                                    | 10018473 | 2 |
| GRANULOMA SKIN                                | 10018698 | 2 |
| GRANULOMATOUS LIVER DISEASE                   | 10018704 | 2 |
| GRAVITATIONAL OEDEMA                          | 10018713 | 2 |
| GRIEF REACTION                                | 10018724 | 2 |
| GUN SHOT WOUND                                | 10018794 | 2 |
| HAEMOGLOBINURIA                               | 10018906 | 2 |
| HAEMOGLOBIN URINE ABSENT                      | 10018907 | 2 |
| HAEMORRHAGIC CEREBRAL INFARCTION              | 10019005 | 2 |
| HALLUCINATION, TACTILE                        | 10019074 | 2 |

|                                           |          |   |
|-------------------------------------------|----------|---|
| HEART TRANSPLANT                          | 10019314 | 2 |
| HEPATITIS A ANTIBODY NORMAL               | 10019724 | 2 |
| HEPATITIS A ANTIBODY POSITIVE             | 10019725 | 2 |
| HEPATITIS C RNA                           | 10019748 | 2 |
| HEPATITIS VIRAL                           | 10019799 | 2 |
| HEPATOTOXICITY                            | 10019851 | 2 |
| HERNIA HIATUS REPAIR                      | 10019915 | 2 |
| HERPES SIMPLEX ENCEPHALITIS               | 10019953 | 2 |
| HIRSUTISM                                 | 10020112 | 2 |
| HYPERALDOSTERONISM                        | 10020571 | 2 |
| HYPERGAMMAGLOBULINAEMIA BENIGN MONOCLONAL | 10020631 | 2 |
| HYPERLACTACIDAEMIA                        | 10020660 | 2 |
| HYPERMAGNESAEMIA                          | 10020669 | 2 |
| HYPERPARATHYROIDISM SECONDARY             | 10020708 | 2 |
| HYPERPHOSPHATAEMIA                        | 10020711 | 2 |
| HYPERPLASIA ADRENAL                       | 10020719 | 2 |
| HYPERTRICHOSIS                            | 10020864 | 2 |
| HYPHAEMA                                  | 10020923 | 2 |
| HYPOCOAGULABLE STATE                      | 10020973 | 2 |
| HYPONATRAEMIC SYNDROME                    | 10021037 | 2 |
| HYPOTRICHOSIS                             | 10021126 | 2 |
| ICHTHYOSIS                                | 10021198 | 2 |
| IDIOPATHIC PULMONARY FIBROSIS             | 10021240 | 2 |
| IMMUNOGLOBULINS ABNORMAL                  | 10021497 | 2 |
| INADEQUATE DIET                           | 10021577 | 2 |
| INCARCERATED HERNIA                       | 10021610 | 2 |
| INCISIONAL HERNIA                         | 10021619 | 2 |
| INCISIONAL HERNIA REPAIR                  | 10021623 | 2 |
| INJECTION SITE FIBROSIS                   | 10022064 | 2 |
| INJECTION SITE HYPERTROPHY                | 10022072 | 2 |
| INJECTION SITE NECROSIS                   | 10022082 | 2 |
| INSPIRATORY CAPACITY                      | 10022445 | 2 |
| INSTILLATION SITE PAIN                    | 10022459 | 2 |
| INSULIN C-PEPTIDE DECREASED               | 10022476 | 2 |
| INSULIN RESISTANT DIABETES                | 10022491 | 2 |
| INTERFERON GAMMA NORMAL                   | 10022538 | 2 |
| INTERVERTEBRAL DISC DISPLACEMENT          | 10022636 | 2 |
| INTESTINAL INFARCTION                     | 10022657 | 2 |
| INTRAOCULAR PRESSURE DECREASED            | 10022804 | 2 |
| IRIDOTOMY                                 | 10022944 | 2 |
| JAUNDICE CHOLESTATIC                      | 10023129 | 2 |
| JAW CYST                                  | 10023146 | 2 |
| KARYOTYPE ANALYSIS                        | 10023302 | 2 |

|                                   |          |   |
|-----------------------------------|----------|---|
| KERATOCONUS                       | 10023353 | 2 |
| KIDNEY SMALL                      | 10023435 | 2 |
| KYPHOSCOLIOSIS                    | 10023506 | 2 |
| LACRIMAL GLAND ENLARGEMENT        | 10023632 | 2 |
| LACRIMATION DISORDER              | 10023643 | 2 |
| LAPAROSCOPY ABNORMAL              | 10023694 | 2 |
| LARYNGITIS VIRAL                  | 10023880 | 2 |
| LE CELLS PRESENT                  | 10024062 | 2 |
| LEARNING DISABILITY               | 10024092 | 2 |
| LERICHE SYNDROME                  | 10024242 | 2 |
| LICHEN NITIDUS                    | 10024428 | 2 |
| LID LAG                           | 10024443 | 2 |
| LINEAR IGA DISEASE                | 10024515 | 2 |
| LIPIDS DECREASED                  | 10024591 | 2 |
| LIPOMA EXCISION                   | 10024614 | 2 |
| LIVER ABSCESS                     | 10024652 | 2 |
| LOCAL ANAESTHESIA                 | 10024758 | 2 |
| LOW DENSITY LIPOPROTEIN DECREASED | 10024909 | 2 |
| LYMPHOCYTIC LEUKAEMIA             | 10025270 | 2 |
| MACROGLOSSIA                      | 10025391 | 2 |
| MACROSOMIA                        | 10025394 | 2 |
| MAGNESIUM DEFICIENCY              | 10025433 | 2 |
| MALARIA                           | 10025487 | 2 |
| MALFORMATION VENOUS               | 10025532 | 2 |
| MALLET FINGER                     | 10026710 | 2 |
| MAXIMAL VOLUNTARY VENTILATION     | 10026958 | 2 |
| MEIGE'S SYNDROME                  | 10027138 | 2 |
| MENOPAUSE DELAYED                 | 10027310 | 2 |
| MENTAL DISABILITY                 | 10027353 | 2 |
| MESENTERIC ARTERIAL OCCLUSION     | 10027394 | 2 |
| MESENTERIC ARTERY STENOSIS        | 10027396 | 2 |
| METANEPHRINE URINE NORMAL         | 10027447 | 2 |
| METASTATIC MALIGNANT MELANOMA     | 10027480 | 2 |
| MONONEUROPATHY MULTIPLEX          | 10027918 | 2 |
| MOUTH CYST                        | 10028020 | 2 |
| MULTIPLE GATED ACQUISITION SCAN   | 10028211 | 2 |
| MUSCLE HAEMORRHAGE                | 10028309 | 2 |
| MUSCLE HYPERTROPHY                | 10028311 | 2 |
| MYALGIA INTERCOSTAL               | 10028413 | 2 |
| MYCETOMA MYCOTIC                  | 10028426 | 2 |
| MYCOTOXICOSIS                     | 10028520 | 2 |
| MYELOFIBROSIS                     | 10028537 | 2 |
| MYOGLOBIN URINE                   | 10028626 | 2 |

|                                                  |          |   |
|--------------------------------------------------|----------|---|
| MYOGLOBINURIA                                    | 10028629 | 2 |
| NAIL DISCOMFORT                                  | 10028693 | 2 |
| NAIL HYPERTROPHY                                 | 10028700 | 2 |
| NASAL ABSCESS                                    | 10028720 | 2 |
| NASAL SEPTUM DISORDER                            | 10028763 | 2 |
| NASAL SEPTUM PERFORATION                         | 10028765 | 2 |
| NASAL VESTIBULITIS                               | 10028781 | 2 |
| NECROSIS ISCHAEMIC                               | 10028862 | 2 |
| NEPHROSCLEROSIS                                  | 10029159 | 2 |
| NEUTROPHIL TOXIC GRANULATION PRESENT             | 10029378 | 2 |
| NODAL OSTEOARTHRITIS                             | 10029469 | 2 |
| NON-SMALL CELL LUNG CANCER STAGE IV              | 10029522 | 2 |
| NOREPINEPHRINE INCREASED                         | 10029752 | 2 |
| NOSOCOMIAL INFECTION                             | 10029803 | 2 |
| OESOPHAGEAL CARCINOMA                            | 10030155 | 2 |
| OESOPHAGEAL HAEMORRHAGE                          | 10030172 | 2 |
| OESOPHAGECTOMY                                   | 10030215 | 2 |
| OPEN ANGLE GLAUCOMA                              | 10030348 | 2 |
| OPEN FRACTURE                                    | 10030527 | 2 |
| OPTICOKINETIC NYSTAGMUS TESTS ABNORMAL           | 10030956 | 2 |
| ORBITAL MYOSITIS                                 | 10031050 | 2 |
| OSTEOMYELITIS CHRONIC                            | 10031256 | 2 |
| OSTEOSCLEROSIS                                   | 10031298 | 2 |
| OTOSALPINGITIS                                   | 10033102 | 2 |
| OTOTOXICITY                                      | 10033109 | 2 |
| PANCREATECTOMY                                   | 10033596 | 2 |
| PANCREATIC CARCINOMA METASTATIC                  | 10033610 | 2 |
| PANCREATIC ENZYME ABNORMALITY                    | 10033619 | 2 |
| PANCREATITIS HAEMORRHAGIC                        | 10033650 | 2 |
| PANOPHTHALMITIS                                  | 10033683 | 2 |
| PAPILLOMA                                        | 10033713 | 2 |
| PARAESTHESIA MUCOSAL                             | 10033780 | 2 |
| PARATHYROIDECTOMY                                | 10033968 | 2 |
| PARIETAL CELL ANTIBODY POSITIVE                  | 10033996 | 2 |
| PAROTIDECTOMY                                    | 10034036 | 2 |
| PEPTIC ULCER HAEMORRHAGE                         | 10034344 | 2 |
| PERFORATION BILE DUCT                            | 10034405 | 2 |
| PERICORONITIS                                    | 10034504 | 2 |
| PERIODONTAL DISEASE                              | 10034536 | 2 |
| PERIPHERAL NERVE NEUROSTIMULATION                | 10034587 | 2 |
| PERIPHERAL NERVOUS SYSTEM FUNCTION TEST ABNORMAL | 10034591 | 2 |
| PERIPHERAL T-CELL LYMPHOMA UNSPECIFIED           | 10034623 | 2 |
| PH URINE ABNORMAL                                | 10034792 | 2 |

|                                               |          |   |
|-----------------------------------------------|----------|---|
| PHAEOCHROMOCYTOMA                             | 10034800 | 2 |
| PITUITARY TUMOUR                              | 10035104 | 2 |
| PLASMA VISCOSITY                              | 10035467 | 2 |
| PLASMINOGEN NORMAL                            | 10035496 | 2 |
| PLASTIC SURGERY TO THE FACE                   | 10035509 | 2 |
| PLATELET MORPHOLOGY ABNORMAL                  | 10035538 | 2 |
| PNEUMONIA CHLAMYDIAL                          | 10035673 | 2 |
| PNEUMONIA HAEMOPHILUS                         | 10035702 | 2 |
| PNEUMONITIS ASPIRATION                        | 10035744 | 2 |
| POLIOMYELITIS                                 | 10036012 | 2 |
| POLYNEUROPATHY IDIOPATHIC PROGRESSIVE         | 10036111 | 2 |
| PORENCEPHALY                                  | 10036172 | 2 |
| PORPHYRIA ACUTE                               | 10036182 | 2 |
| POST POLIO SYNDROME                           | 10036239 | 2 |
| POSTERIOR CAPSULE OPACIFICATION               | 10036346 | 2 |
| PREAURICULAR CYST                             | 10036509 | 2 |
| PRECIPITATE LABOUR                            | 10036519 | 2 |
| PREGNANCY TEST FALSE POSITIVE                 | 10036573 | 2 |
| PRESBYACUSIS                                  | 10036626 | 2 |
| PROGRESSIVE SUPRANUCLEAR PALSY                | 10036813 | 2 |
| PROLONGED PREGNANCY                           | 10036877 | 2 |
| PROPHYLAXIS                                   | 10036898 | 2 |
| PROTHROMBIN LEVEL ABNORMAL                    | 10037048 | 2 |
| PROTHROMBIN LEVEL DECREASED                   | 10037050 | 2 |
| PSYCHOMOTOR RETARDATION                       | 10037213 | 2 |
| PSYCHOTHERAPY                                 | 10037247 | 2 |
| PSYCHOTIC BEHAVIOUR                           | 10037249 | 2 |
| PULMONARY ARTERIAL WEDGE PRESSURE             | 10037325 | 2 |
| PULMONARY HAEMOSIDEROSIS                      | 10037396 | 2 |
| RADIATION ASSOCIATED PAIN                     | 10037755 | 2 |
| RADIOACTIVE IODINE THERAPY                    | 10037784 | 2 |
| RADIOALLERGOSORBENT TEST                      | 10037787 | 2 |
| RASH PAPULOSQUAMOUS                           | 10037879 | 2 |
| REACTION TO FOOD ADDITIVE                     | 10037977 | 2 |
| RECTAL CANCER STAGE IV                        | 10038051 | 2 |
| RECTAL PROLAPSE REPAIR                        | 10038078 | 2 |
| RED BLOOD CELL HYPOCHROMIC MORPHOLOGY PRESENT | 10038161 | 2 |
| RENAL TUBULAR DISORDER                        | 10038537 | 2 |
| RENAL VASCULITIS                              | 10038546 | 2 |
| RETINAL ARTERY EMBOLISM                       | 10038826 | 2 |
| RETINAL DEGENERATION                          | 10038845 | 2 |
| RETINAL PIGMENT EPITHELIOPATHY                | 10038893 | 2 |
| RETINITIS                                     | 10038910 | 2 |



|                                |          |   |
|--------------------------------|----------|---|
| RETRACTED NIPPLE               | 10038944 | 2 |
| RHESUS ANTIBODIES POSITIVE     | 10039036 | 2 |
| RHEUMATIC FEVER                | 10039054 | 2 |
| RUBELLA IMMUNITY CONFIRMED     | 10039262 | 2 |
| SALIVARY GLAND CALCULUS        | 10039394 | 2 |
| SALPINGITIS                    | 10039453 | 2 |
| SCLERODERMA-LIKE REACTION      | 10039714 | 2 |
| SEASONAL AFFECTIVE DISORDER    | 10039775 | 2 |
| SELECTIVE IGA IMMUNODEFICIENCY | 10039915 | 2 |
| SENILE DEMENTIA                | 10039966 | 2 |
| SENSORY NEUROPATHY HEREDITARY  | 10040037 | 2 |
| SEPTIC EMBOLUS                 | 10040067 | 2 |
| SHOCK HYPOGLYCAEMIC            | 10040576 | 2 |
| SICKLE CELL DISEASE            | 10040644 | 2 |
| SIGMOIDOSCOPY NORMAL           | 10040671 | 2 |
| SINUS POLYP                    | 10040749 | 2 |
| SKIN FRAGILITY                 | 10040851 | 2 |
| SKULL FRACTURED BASE           | 10040960 | 2 |
| SLIT-LAMP TESTS ABNORMAL       | 10041033 | 2 |
| SMALL INTESTINAL ANASTOMOSIS   | 10041094 | 2 |
| SMALL INTESTINAL PERFORATION   | 10041103 | 2 |
| SOCIAL ALCOHOL DRINKER         | 10041241 | 2 |
| SOCIAL ANXIETY DISORDER        | 10041242 | 2 |
| SPINAL CORD INJURY LUMBAR      | 10041555 | 2 |
| SPINAL MUSCULAR ATROPHY        | 10041582 | 2 |
| SPLENIC HAEMATOMA              | 10041646 | 2 |
| SPLENIC INJURY                 | 10041649 | 2 |
| SPORTS INJURY                  | 10041738 | 2 |
| SUBCLAVIAN ARTERY THROMBOSIS   | 10042334 | 2 |
| SUSPICIOUSNESS                 | 10042635 | 2 |
| SYMPTOM MASKED                 | 10042750 | 2 |
| SYSTEMIC CANDIDA               | 10042938 | 2 |
| T-CELL LYMPHOMA                | 10042971 | 2 |
| TACHYCARDIA PAROXYSMAL         | 10043079 | 2 |
| TANNING                        | 10043115 | 2 |
| TARSAL TUNNEL SYNDROME         | 10043121 | 2 |
| TENDON SHEATH INCISION         | 10043250 | 2 |
| TERMINAL ILEITIS               | 10043280 | 2 |
| TESTICULAR DISORDER            | 10043306 | 2 |
| TESTICULAR PAIN                | 10043345 | 2 |
| THROAT CANCER                  | 10043515 | 2 |
| THROMBIN TIME                  | 10043539 | 2 |
| THYMECTOMY                     | 10043661 | 2 |

|                                          |          |   |
|------------------------------------------|----------|---|
| THYROID ATROPHY                          | 10043693 | 2 |
| THYROID RELEASING HORMONE CHALLENGE TEST | 10043763 | 2 |
| TINEA CAPITIS                            | 10043866 | 2 |
| TOOTH EROSION                            | 10044038 | 2 |
| TRACHEAL OBSTRUCTION                     | 10044291 | 2 |
| TRANCE                                   | 10044334 | 2 |
| TRANSFERRIN DECREASED                    | 10044356 | 2 |
| TRANSFERRIN INCREASED                    | 10044357 | 2 |
| TRI-IODOTHYRONINE UPTAKE INCREASED       | 10044602 | 2 |
| TRISOMY 21                               | 10044688 | 2 |
| TRISOMY 22                               | 10044689 | 2 |
| TUMOUR LYSIS SYNDROME                    | 10045170 | 2 |
| TURNER'S SYNDROME                        | 10045181 | 2 |
| UMBILICAL CORD AROUND NECK               | 10045447 | 2 |
| UNINTENDED PREGNANCY                     | 10045542 | 2 |
| URETERIC CALCULUS REMOVAL                | 10046391 | 2 |
| URETERIC DILATATION                      | 10046399 | 2 |
| URETERIC OBSTRUCTION                     | 10046406 | 2 |
| URINE ELECTROPHORESIS                    | 10046635 | 2 |
| URINE OSMOLARITY                         | 10046652 | 2 |
| URINE PORPHOBILINOGEN INCREASED          | 10046658 | 2 |
| URINE SODIUM NORMAL                      | 10046673 | 2 |
| URTICARIA CONTACT                        | 10046742 | 2 |
| URTICARIA PHYSICAL                       | 10046751 | 2 |
| UTERINE NEOPLASM                         | 10046803 | 2 |
| UTERINE PROLAPSE                         | 10046814 | 2 |
| UTERINE RUPTURE                          | 10046820 | 2 |
| UTERINE TENDERNESS                       | 10046827 | 2 |
| VAGINITIS GARDNERELLA                    | 10046957 | 2 |
| VARICOSE VEIN RUPTURED                   | 10046999 | 2 |
| VASCULAR HEADACHE                        | 10047077 | 2 |
| VENA CAVA EMBOLISM                       | 10047193 | 2 |
| VENOUS PRESSURE JUGULAR INCREASED        | 10047240 | 2 |
| VIRAL LABYRINTHITIS                      | 10047466 | 2 |
| VITAL CAPACITY NORMAL                    | 10047583 | 2 |
| VITAMIN B6 DEFICIENCY                    | 10047617 | 2 |
| VULVAL OEDEMA                            | 10047763 | 2 |
| VULVITIS                                 | 10047780 | 2 |
| WALDENSTROM'S MACROGLOBULINAEMIA         | 10047801 | 2 |
| WARM TYPE HAEMOLYTIC ANAEMIA             | 10047822 | 2 |
| WHITE BLOOD CELL AGGLUTINATION PRESENT   | 10047937 | 2 |
| XANTHOCHROMIA                            | 10048213 | 2 |
| XEROSIS                                  | 10048222 | 2 |

|                                               |          |   |
|-----------------------------------------------|----------|---|
| CARDIOMYOPATHY ACUTE                          | 10048377 | 2 |
| GROWTH OF EYELASHES                           | 10048462 | 2 |
| SUTURE RUPTURE                                | 10048547 | 2 |
| HYDROTHORAX                                   | 10048612 | 2 |
| SKIN MACERATION                               | 10048625 | 2 |
| SUBDURAL HYGROMA                              | 10048626 | 2 |
| INFUSION SITE ERYTHEMA                        | 10048634 | 2 |
| POOR VENOUS ACCESS                            | 10048737 | 2 |
| OESOPHAGOGASTRIC FUNDOPLASTY                  | 10048852 | 2 |
| PITYRIASIS LICHENOIDES ET VARIOLIFORMIS ACUTA | 10048895 | 2 |
| BLADDER IRRIGATION                            | 10048923 | 2 |
| RECTAL ABSCESS                                | 10048947 | 2 |
| CYTOMEGALOVIRUS COLITIS                       | 10048983 | 2 |
| RENAL ARTERY OCCLUSION                        | 10048988 | 2 |
| HYSTEROSALPINGO-OOPHORECTOMY                  | 10049149 | 2 |
| RED BLOOD CELL AGGLUTINATION                  | 10049190 | 2 |
| BLEEDING TIME ABNORMAL                        | 10049227 | 2 |
| CARBOHYDRATE ANTIGEN 15-3                     | 10049249 | 2 |
| CARBOHYDRATE ANTIGEN 27.29                    | 10049250 | 2 |
| SHORT-BOWEL SYNDROME                          | 10049416 | 2 |
| CARDIAC PACEMAKER REPLACEMENT                 | 10049434 | 2 |
| LYMPHANGIOLEIOMYOMATOSIS                      | 10049459 | 2 |
| DEHYDROEPIANDROSTERONE INCREASED              | 10049482 | 2 |
| BRAIN STEM AUDITORY EVOKED RESPONSE NORMAL    | 10049508 | 2 |
| TRAUMATIC FRACTURE                            | 10049514 | 2 |
| ANTI-ERYTHROCYTE ANTIBODY                     | 10049523 | 2 |
| ATRIAL PRESSURE INCREASED                     | 10049785 | 2 |
| COLORECTOSTOMY                                | 10049804 | 2 |
| ANAL SPHINCTER ATONY                          | 10049823 | 2 |
| ABULIA                                        | 10050013 | 2 |
| APPLICATION SITE NODULE                       | 10050101 | 2 |
| POSTUROGRAPHY                                 | 10050120 | 2 |
| OPHTHALMOPLEGIC MIGRAINE                      | 10050122 | 2 |
| CEREBRAL HAEMORRHAGE FOETAL                   | 10050157 | 2 |
| VOCAL CORD ATROPHY                            | 10050201 | 2 |
| ANAL INFLAMMATION                             | 10050247 | 2 |
| CARDIOVASCULAR DECONDITIONING                 | 10050257 | 2 |
| TUMOUR ULCERATION                             | 10050283 | 2 |
| ELECTROCARDIOGRAM P WAVE ABNORMAL             | 10050384 | 2 |
| SEROLOGY ABNORMAL                             | 10050408 | 2 |
| SEROLOGY POSITIVE                             | 10050409 | 2 |
| ANASTOMOTIC LEAK                              | 10050456 | 2 |
| MORBID THOUGHTS                               | 10050464 | 2 |

|                                   |          |   |
|-----------------------------------|----------|---|
| SINOSCOPY                         | 10050499 | 2 |
| ANTI-ISLET CELL ANTIBODY          | 10050516 | 2 |
| URINE CALCIUM                     | 10050520 | 2 |
| ATRIAL PRESSURE                   | 10050641 | 2 |
| LEUKONYCHIA                       | 10050658 | 2 |
| CYSTITIS-LIKE SYMPTOM             | 10050687 | 2 |
| OESOPHAGEAL MANOMETRY             | 10050703 | 2 |
| RED BLOOD CELL BURR CELLS PRESENT | 10050761 | 2 |
| METAMYELOCYTE COUNT INCREASED     | 10050765 | 2 |
| MYELOCYTE COUNT INCREASED         | 10050985 | 2 |
| GASTROINTESTINAL STROMAL TUMOUR   | 10051066 | 2 |
| PRESCRIBED OVERDOSE               | 10051076 | 2 |
| PROTEIN S DECREASED               | 10051120 | 2 |
| ACQUIRED DYSFIBRINOGENAEMIA       | 10051122 | 2 |
| MECONIUM IN AMNIOTIC FLUID        | 10051133 | 2 |
| SPLENIC CYST                      | 10051169 | 2 |
| PLANTAR ERYTHEMA                  | 10051170 | 2 |
| NASAL ODOUR                       | 10051181 | 2 |
| POSTOPERATIVE ABSCESS             | 10051182 | 2 |
| CAMPYLOBACTER INFECTION           | 10051226 | 2 |
| PHOTODERMATOSIS                   | 10051246 | 2 |
| SPONDYLOARTHROPATHY               | 10051265 | 2 |
| BLOOD VISCOSITY INCREASED         | 10051293 | 2 |
| NEUROLOGICAL INFECTION            | 10051295 | 2 |
| SOFT TISSUE HAEMORRHAGE           | 10051297 | 2 |
| T-LYMPHOCYTE COUNT DECREASED      | 10051318 | 2 |
| THYROGLOSSAL CYST                 | 10051320 | 2 |
| BILE OUTPUT                       | 10051345 | 2 |
| THROMBIN TIME NORMAL              | 10051389 | 2 |
| MALIGNANT NEOPLASM PROGRESSION    | 10051398 | 2 |
| BIOPSY CHEST WALL                 | 10051412 | 2 |
| VIRAL MYOSITIS                    | 10051512 | 2 |
| LUNG TRANSPLANT REJECTION         | 10051604 | 2 |
| PARATHYROID GLAND ENLARGEMENT     | 10051653 | 2 |
| PITUITARY CYST                    | 10051687 | 2 |
| METASTASES TO MENINGES            | 10051696 | 2 |
| PLATELETPHERESIS                  | 10051719 | 2 |
| PROTEIN S INCREASED               | 10051735 | 2 |
| PULMONARY CAVITATION              | 10051738 | 2 |
| AORTIC BRUIT                      | 10051832 | 2 |
| EXPOSURE TO ALLERGEN              | 10051841 | 2 |
| TONGUE CYST                       | 10051879 | 2 |
| ENDOMETRIAL ATROPHY               | 10051909 | 2 |

|                                              |          |   |
|----------------------------------------------|----------|---|
| GLOMERULONEPHROPATHY                         | 10051920 | 2 |
| FEBRILE INFECTION                            | 10051998 | 2 |
| PANCREATIC ISLETS HYPERPLASIA                | 10052031 | 2 |
| HYDROMETRA                                   | 10052096 | 2 |
| OCCUPATIONAL THERAPY                         | 10066401 | 2 |
| POST PROCEDURAL SWELLING                     | 10066415 | 2 |
| ANAEMIA OF PREGNANCY                         | 10066468 | 2 |
| ACUTE POLYNEUROPATHY                         | 10066699 | 2 |
| ACUTE INTERSTITIAL PNEUMONITIS               | 10066728 | 2 |
| SCLERAL BUCKLING SURGERY                     | 10066785 | 2 |
| MECHANICAL VENTILATION COMPLICATION          | 10066821 | 2 |
| HUMAN HERPESVIRUS 6 INFECTION REACTIVATION   | 10066845 | 2 |
| SURGICAL FAILURE                             | 10066902 | 2 |
| BLADDER HYDRODISTENSION                      | 10066923 | 2 |
| BOWEL PREPARATION                            | 10066943 | 2 |
| FISTULA DISCHARGE                            | 10067143 | 2 |
| CEREBELLAR EMBOLISM                          | 10067167 | 2 |
| AIRWAY BURNS                                 | 10067204 | 2 |
| MINI-TRACHEOSTOMY                            | 10067205 | 2 |
| MONOCYTE PERCENTAGE ABNORMAL                 | 10067238 | 2 |
| SLIPPING RIB SYNDROME                        | 10067349 | 2 |
| INTRAOCULAR LENS IMPLANT                     | 10067434 | 2 |
| MYELOMALACIA                                 | 10067441 | 2 |
| CONFUSIONAL AROUSAL                          | 10067494 | 2 |
| TRENDELENBURG POSITION                       | 10067496 | 2 |
| URINARY CASTS PRESENT                        | 10067534 | 2 |
| ACTIVATED PROTEIN C RESISTANCE TEST POSITIVE | 10067648 | 2 |
| END-TIDAL CO2 DECREASED                      | 10067665 | 2 |
| PARASITIC GASTROENTERITIS                    | 10067720 | 2 |
| PULMONARY AIR LEAKAGE                        | 10067826 | 2 |
| DEMENTIA WITH LEWY BODIES                    | 10067889 | 2 |
| PHOTOREFRACTIVE KERATECTOMY                  | 10067902 | 2 |
| INTERSTITIAL GRANULOMATOUS DERMATITIS        | 10067972 | 2 |
| SWEAT TEST                                   | 10068025 | 2 |
| SWEAT TEST ABNORMAL                          | 10068027 | 2 |
| GASTROINTESTINAL SURGERY                     | 10068093 | 2 |
| ENDOVENOUS ABLATION                          | 10068094 | 2 |
| VESTIBULAR NYSTAGMUS                         | 10068101 | 2 |
| METASTATIC CARCINOID TUMOUR                  | 10068115 | 2 |
| HEAT ILLNESS                                 | 10068188 | 2 |
| ANTI FACTOR VIII ANTIBODY TEST               | 10068229 | 2 |
| GASTROINTESTINAL BACTERIAL INFECTION         | 10068306 | 2 |
| HEPATITIS B DNA INCREASED                    | 10068379 | 2 |

|                                                  |          |   |
|--------------------------------------------------|----------|---|
| DRUG DELIVERY SYSTEM MALFUNCTION                 | 10068383 | 2 |
| CAPILLARITIS                                     | 10068406 | 2 |
| VENOUS OXYGEN SATURATION                         | 10068425 | 2 |
| NATURAL KILLER CELL COUNT                        | 10068495 | 2 |
| EXPOSURE TO CONTAMINATED DEVICE                  | 10068515 | 2 |
| INTRA-ABDOMINAL PRESSURE INCREASED               | 10068611 | 2 |
| EXERTIONAL HEADACHE                              | 10068614 | 2 |
| POST PROCEDURAL CONSTIPATION                     | 10068620 | 2 |
| EMPHYSEMATOUS PYELONEPHRITIS                     | 10068822 | 2 |
| SCHIZOAFFECTIVE DISORDER BIPOLAR TYPE            | 10068889 | 2 |
| GASTROINTESTINAL EXAMINATION NORMAL              | 10068976 | 2 |
| VON WILLEBRAND'S FACTOR ANTIGEN NORMAL           | 10068982 | 2 |
| AUTOIMMUNE PANCREATITIS                          | 10069002 | 2 |
| MAMMARY DUCTECTOMY                               | 10069117 | 2 |
| HYPERGEUSIA                                      | 10069147 | 2 |
| PRODUCT CONTAMINATION                            | 10069173 | 2 |
| PRODUCT TASTE ABNORMAL                           | 10069227 | 2 |
| SUBRETINAL FLUID                                 | 10069356 | 2 |
| VACCINATION SITE DERMATITIS                      | 10069477 | 2 |
| MAST CELL DEGRANULATION TEST                     | 10069536 | 2 |
| MONKEYPOX                                        | 10069538 | 2 |
| VACCINATION SITE GRANULOMA                       | 10069562 | 2 |
| ROBUST TAKE FOLLOWING EXPOSURE TO VACCINIA VIRUS | 10069576 | 2 |
| DISEASE PRODROMAL STAGE                          | 10069581 | 2 |
| VACCINATION SITE NECROSIS                        | 10069625 | 2 |
| BONE MARROW RETICULIN FIBROSIS                   | 10069678 | 2 |
| THROMBOPOIETIN LEVEL ABNORMAL                    | 10069685 | 2 |
| COMA SCALE NORMAL                                | 10069707 | 2 |
| LOW CARBOHYDRATE DIET                            | 10069751 | 2 |
| ADMINISTRATION RELATED REACTION                  | 10069773 | 2 |
| PANCREATIC STENT PLACEMENT                       | 10069809 | 2 |
| EYE COMPLICATION ASSOCIATED WITH DEVICE          | 10069837 | 2 |
| DEVICE INFORMATION OUTPUT ISSUE                  | 10069842 | 2 |
| DEVICE MATERIAL ISSUE                            | 10069871 | 2 |
| CSF VOLUME INCREASED                             | 10069903 | 2 |
| LACRIMAL HAEMORRHAGE                             | 10069930 | 2 |
| CITROBACTER TEST POSITIVE                        | 10069963 | 2 |
| MORAXELLA TEST POSITIVE                          | 10070095 | 2 |
| NEISSERIA TEST POSITIVE                          | 10070096 | 2 |
| GARDNERELLA TEST POSITIVE                        | 10070099 | 2 |
| SALMONELLA TEST POSITIVE                         | 10070127 | 2 |
| BARTONELLA TEST POSITIVE                         | 10070157 | 2 |
| EHRlichia TEST POSITIVE                          | 10070195 | 2 |

|                                        |          |   |
|----------------------------------------|----------|---|
| HEPATITIS A VIRUS TEST POSITIVE        | 10070216 | 2 |
| FOREIGN BODY                           | 10070245 | 2 |
| RUBIVIRUS TEST POSITIVE                | 10070250 | 2 |
| BRUCELLA TEST NEGATIVE                 | 10070269 | 2 |
| MYCOBACTERIUM TEST POSITIVE            | 10070323 | 2 |
| RUBULAVIRUS TEST POSITIVE              | 10070347 | 2 |
| NOROVIRUS TEST POSITIVE                | 10070379 | 2 |
| COXSACKIE VIRUS TEST POSITIVE          | 10070384 | 2 |
| ASPERGILLUS TEST POSITIVE              | 10070448 | 2 |
| CANDIDA TEST                           | 10070453 | 2 |
| IMMUNE TOLERANCE INDUCTION             | 10070581 | 2 |
| EXTERNAL CEPHALIC VERSION              | 10070636 | 2 |
| KNUCKLE PADS                           | 10070650 | 2 |
| LIMB ASYMMETRY                         | 10070670 | 2 |
| MALARIA ANTIBODY TEST NEGATIVE         | 10070880 | 2 |
| OVARIAN CANCER STAGE IV                | 10070908 | 2 |
| BONE DEFORMITY                         | 10070918 | 2 |
| REYNOLD'S SYNDROME                     | 10070953 | 2 |
| PRODUCT PHYSICAL ISSUE                 | 10071134 | 2 |
| VENTRICULAR DYSSYNCHRONY               | 10071186 | 2 |
| BINGE DRINKING                         | 10071238 | 2 |
| PRODUCT ORIGIN UNKNOWN                 | 10071242 | 2 |
| HEPATITIS B SURFACE ANTIBODY POSITIVE  | 10071346 | 2 |
| EXPOSURE VIA PARTNER                   | 10071412 | 2 |
| ANTI-GANGLIOSIDE ANTIBODY              | 10071473 | 2 |
| ANTI-VGCC ANTIBODY                     | 10071476 | 2 |
| ANTI-COMPLEMENT ANTIBODY               | 10071477 | 2 |
| IMMUNOPHENOTYPING                      | 10071534 | 2 |
| IL-2 RECEPTOR ASSAY                    | 10071599 | 2 |
| UMBILICAL CORD THROMBOSIS              | 10071652 | 2 |
| CARBONIC ANHYDRASE GENE MUTATION ASSAY | 10071964 | 2 |
| SMALL SIZE PLACENTA                    | 10072038 | 2 |
| MEDICAL COUNSELLING                    | 10072071 | 2 |
| ENVIRONMENTAL EXPOSURE                 | 10072082 | 2 |
| STIFF PERSON SYNDROME                  | 10072148 | 2 |
| RENAL VASCULAR THROMBOSIS              | 10072226 | 2 |
| CHRONIC VILLITIS OF UNKNOWN ETIOLOGY   | 10072271 | 2 |
| NEUROMYOTONIA                          | 10072359 | 2 |
| ACTION TREMOR                          | 10072413 | 2 |
| FAECAL CALPROTECTIN NORMAL             | 10072480 | 2 |
| HYDROGEN BREATH TEST ABNORMAL          | 10072485 | 2 |
| ANTI-NMDA ANTIBODY NEGATIVE            | 10072499 | 2 |
| ANTI-NMDA ANTIBODY POSITIVE            | 10072500 | 2 |

|                                               |          |   |
|-----------------------------------------------|----------|---|
| ANTI-VGCC ANTIBODY NEGATIVE                   | 10072501 | 2 |
| ANTI-AQUAPORIN-4 ANTIBODY POSITIVE            | 10072508 | 2 |
| ANTI-GANGLIOSIDE ANTIBODY NEGATIVE            | 10072515 | 2 |
| ANTI-MUSCLE SPECIFIC KINASE ANTIBODY NEGATIVE | 10072521 | 2 |
| ANTIRIBOSOMAL P ANTIBODY                      | 10072533 | 2 |
| VIRAL PAROTITIS                               | 10072589 | 2 |
| ORTHOPAEDIC PROCEDURE                         | 10072627 | 2 |
| POSTOPERATIVE RESPIRATORY FAILURE             | 10072651 | 2 |
| PELVIC CYST                                   | 10072715 | 2 |
| PHARYNGO-OESOPHAGEAL DIVERTICULUM             | 10072785 | 2 |
| PREGNANCY OF UNKNOWN LOCATION                 | 10072811 | 2 |
| INTERFERON GAMMA RELEASE ASSAY POSITIVE       | 10072866 | 2 |
| PULMONARY ENDARTERECTOMY                      | 10072893 | 2 |
| CORTICOSTEROID BINDING GLOBULIN TEST          | 10072932 | 2 |
| BIRDSHOT CHORIORETINOPATHY                    | 10072959 | 2 |
| GASTROSTOMY TUBE REMOVAL                      | 10072964 | 2 |
| CONGENITAL SKIN DIMPLES                       | 10072978 | 2 |
| INVASIVE PAPILLARY BREAST CARCINOMA           | 10073098 | 2 |
| FAT TISSUE DECREASED                          | 10073170 | 2 |
| GASTROINTESTINAL DILATION PROCEDURE           | 10073232 | 2 |
| OVARIAN CLEAR CELL CARCINOMA                  | 10073268 | 2 |
| UPPER RESPIRATORY TRACT ENDOSCOPY             | 10073332 | 2 |
| PLEOMORPHIC ADENOMA                           | 10073372 | 2 |
| OEDEMATOUS KIDNEY                             | 10073381 | 2 |
| TRANSFERRIN RECEPTOR ASSAY                    | 10073450 | 2 |
| SPLEEN CONTUSION                              | 10073533 | 2 |
| EPIDURAL HAEMORRHAGE                          | 10073681 | 2 |
| MUSCULOSKELETAL INJURY                        | 10073713 | 2 |
| LACK OF INJECTION SITE ROTATION               | 10073752 | 2 |
| EPIDURAL CATHETER PLACEMENT                   | 10074181 | 2 |
| HERPES ZOSTER CUTANEOUS DISSEMINATED          | 10074297 | 2 |
| OPHTHALMIC VEIN THROMBOSIS                    | 10074349 | 2 |
| DRUG PROVOCATION TEST                         | 10074350 | 2 |
| POSITIVE EXPIRATORY PRESSURE THERAPY          | 10074372 | 2 |
| NONINFECTIVE OOPHORITIS                       | 10074436 | 2 |
| TENDON LAXITY                                 | 10074443 | 2 |
| HEPATIC VASCULAR THROMBOSIS                   | 10074494 | 2 |
| SPLENIC ARTERY THROMBOSIS                     | 10074600 | 2 |
| NONINFECTIVE CONJUNCTIVITIS                   | 10074701 | 2 |
| ADMINISTRATION SITE INFLAMMATION              | 10074704 | 2 |
| COLONIC LAVAGE                                | 10074741 | 2 |
| FOWLER'S POSITION                             | 10074743 | 2 |
| INFECTED SEROMA                               | 10074755 | 2 |



|                                         |          |   |
|-----------------------------------------|----------|---|
| PRODUCT PACKAGING CONFUSION             | 10074776 | 2 |
| ORAL MUCOSA HAEMATOMA                   | 10074779 | 2 |
| THECAL SAC COMPRESSION                  | 10074801 | 2 |
| SECONDARY CEREBELLAR DEGENERATION       | 10074943 | 2 |
| MULTIPLE DRUG THERAPY                   | 10074950 | 2 |
| RIGHT HEMISPHERE DEFICIT SYNDROME       | 10075037 | 2 |
| ALTERED PITCH PERCEPTION                | 10075083 | 2 |
| ADMINISTRATION SITE DISCHARGE           | 10075097 | 2 |
| ADMINISTRATION SITE DISCOLOURATION      | 10075098 | 2 |
| ENZYME LEVEL ABNORMAL                   | 10075119 | 2 |
| DIET FAILURE                            | 10075213 | 2 |
| FOETAL BIOPHYSICAL PROFILE SCORE        | 10075216 | 2 |
| ECG SIGNS OF MYOCARDIAL INFARCTION      | 10075299 | 2 |
| ELECTROCARDIOGRAM J WAVE ABNORMAL       | 10075347 | 2 |
| REACTIVE GASTROPATHY                    | 10075425 | 2 |
| MEDICAL CANNABIS THERAPY                | 10075530 | 2 |
| CUTANEOUS SYMPTOM                       | 10075531 | 2 |
| GOMORI METHENAMINE SILVER STAIN         | 10075549 | 2 |
| CHANGE IN SEIZURE PRESENTATION          | 10075606 | 2 |
| INTESTINAL SEPSIS                       | 10075622 | 2 |
| ACUTE HAEMORRHAGIC ULCERATIVE COLITIS   | 10075634 | 2 |
| CARDIAC PACEMAKER ADJUSTMENT            | 10075685 | 2 |
| AUTOIMMUNE DERMATITIS                   | 10075689 | 2 |
| VASCULITIC ULCER                        | 10075714 | 2 |
| AORTIC PERFORATION                      | 10075729 | 2 |
| MODIFIED RANKIN SCORE                   | 10075864 | 2 |
| MACULAR DETACHMENT                      | 10075873 | 2 |
| ADMINISTRATION SITE DISCOMFORT          | 10075928 | 2 |
| ADMINISTRATION SITE IRRITATION          | 10075941 | 2 |
| IDIOPATHIC ORBITAL INFLAMMATION         | 10075997 | 2 |
| GASTROSTOMY TUBE SITE COMPLICATION      | 10076053 | 2 |
| PLANNING TO BECOME PREGNANT             | 10076056 | 2 |
| INFUSION SITE JOINT MOVEMENT IMPAIRMENT | 10076075 | 2 |
| VACCINATION SITE CALCIFICATION          | 10076156 | 2 |
| VACCINATION SITE JOINT INFLAMMATION     | 10076174 | 2 |
| VACCINATION SITE PLAQUE                 | 10076187 | 2 |
| DILATED PORES                           | 10076249 | 2 |
| FLUID BALANCE POSITIVE                  | 10076267 | 2 |
| VASCULAR DEVICE USER                    | 10076273 | 2 |
| ANTI-SACCHAROMYCES CEREVISIAE ANTIBODY  | 10076310 | 2 |
| SPINAL INSTABILITY                      | 10076339 | 2 |
| DEVICE LOOSENING                        | 10076364 | 2 |
| VASCULAR COMPRESSION THERAPY            | 10076482 | 2 |

|                                                      |          |   |
|------------------------------------------------------|----------|---|
| TIDAL VOLUME                                         | 10076535 | 2 |
| MARGINAL ZONE LYMPHOMA                               | 10076596 | 2 |
| CHEST WALL HAEMATOMA                                 | 10076597 | 2 |
| ATHEROSCLEROTIC PLAQUE RUPTURE                       | 10076604 | 2 |
| NECROTISING SOFT TISSUE INFECTION                    | 10076637 | 2 |
| PRIMARY COUGH HEADACHE                               | 10076707 | 2 |
| PROLAPSE                                             | 10076708 | 2 |
| PELVIC OPERATION                                     | 10076776 | 2 |
| CEREBRAL VASCULAR OCCLUSION                          | 10076895 | 2 |
| SYSTEMIC IMMUNE ACTIVATION                           | 10076970 | 2 |
| TUMOUR MARKER ABNORMAL                               | 10077029 | 2 |
| HEPATITIS C CORE ANTIBODY NEGATIVE                   | 10077054 | 2 |
| PENETRATING AORTIC ULCER                             | 10077118 | 2 |
| NEURITIC PLAQUES                                     | 10077174 | 2 |
| ALLERGY TO SURGICAL SUTURES                          | 10077279 | 2 |
| ISCHAEMIC SKIN ULCER                                 | 10077408 | 2 |
| DUST ALLERGY                                         | 10077439 | 2 |
| PULMONARY RESECTION                                  | 10077488 | 2 |
| VERTEBRAL ARTERY ANEURYSM                            | 10077498 | 2 |
| ORAL PIGMENTATION                                    | 10077552 | 2 |
| GASTRORRHAPHY                                        | 10077591 | 2 |
| BASILAR ARTERY ANEURYSM                              | 10077607 | 2 |
| PORTOSPLENOMESENTERIC VENOUS THROMBOSIS              | 10077623 | 2 |
| MANUFACTURING ISSUE                                  | 10077796 | 2 |
| PERSISTENT DEPRESSIVE DISORDER                       | 10077804 | 2 |
| C3 GLOMERULOPATHY                                    | 10077827 | 2 |
| OBSTRUCTIVE NEPHROPATHY                              | 10077862 | 2 |
| METABOLIC SURGERY                                    | 10078004 | 2 |
| LIMBIC ENCEPHALITIS                                  | 10078012 | 2 |
| SOMATIC SYMPTOM DISORDER OF PREGNANCY                | 10078085 | 2 |
| FLAVIVIRUS TEST NEGATIVE                             | 10078301 | 2 |
| ANTI-MYELIN-ASSOCIATED GLYCOPROTEIN ANTIBODIES POSIT | 10078318 | 2 |
| PERINATAL DEPRESSION                                 | 10078366 | 2 |
| CISTERNOGRAM                                         | 10078378 | 2 |
| GRANULOMATOUS LYMPHADENITIS                          | 10078494 | 2 |
| VASCULAR ACCESS SITE THROMBOSIS                      | 10078675 | 2 |
| TENSOR FASCIAE LATAE SYNDROME                        | 10078698 | 2 |
| LARYNGEAL TREMOR                                     | 10078751 | 2 |
| CYSTIC LUNG DISEASE                                  | 10078811 | 2 |
| PRIMARY FAMILIAL BRAIN CALCIFICATION                 | 10078822 | 2 |
| NONINFECTIVE MYRINGITIS                              | 10078830 | 2 |
| PERSISTENT GENITAL AROUSAL DISORDER                  | 10078966 | 2 |
| SILENT THYROIDITIS                                   | 10079012 | 2 |

|                                                      |          |   |
|------------------------------------------------------|----------|---|
| GASTROINTESTINAL POLYP                               | 10079055 | 2 |
| SUSPECTED PRODUCT CONTAMINATION                      | 10079078 | 2 |
| NASOPHARYNGOSCOPY                                    | 10079094 | 2 |
| UTERINE IRRITABILITY                                 | 10079224 | 2 |
| RADIOLOGICALLY ISOLATED SYNDROME                     | 10079292 | 2 |
| DRUG EFFECTIVE FOR UNAPPROVED INDICATION             | 10079317 | 2 |
| DRUG USE DISORDER                                    | 10079381 | 2 |
| MISOPHONIA                                           | 10079388 | 2 |
| HYPERTENSIVE END-ORGAN DAMAGE                        | 10079496 | 2 |
| BACTERIAL VULVOVAGINITIS                             | 10079528 | 2 |
| ANTI FACTOR XA ASSAY NORMAL                          | 10079648 | 2 |
| DIFFUSION-WEIGHTED BRAIN MRI ABNORMAL                | 10079717 | 2 |
| DIFFUSION-WEIGHTED BRAIN MRI NORMAL                  | 10079719 | 2 |
| LABOUR AUGMENTATION                                  | 10079807 | 2 |
| LIP COSMETIC PROCEDURE                               | 10079830 | 2 |
| HYPOSPLENISM                                         | 10079831 | 2 |
| NUTRITIONAL ASSESSMENT                               | 10079875 | 2 |
| FOETAL HEART RATE INDETERMINATE                      | 10079882 | 2 |
| INTENSIVE CARE UNIT DELIRIUM                         | 10080066 | 2 |
| PARANASAL SINUS HAEMORRHAGE                          | 10080108 | 2 |
| FRANCISELLA TEST                                     | 10080178 | 2 |
| RECALLED PRODUCT                                     | 10080231 | 2 |
| WRONG DOSE                                           | 10080304 | 2 |
| SEPTIC SCREEN                                        | 10080310 | 2 |
| FUNGAL DISEASE CARRIER                               | 10080548 | 2 |
| DRUG TROUGH LEVEL                                    | 10080597 | 2 |
| RELAPSING MULTIPLE SCLEROSIS                         | 10080700 | 2 |
| COUNTERFEIT PRODUCT ADMINISTERED                     | 10080754 | 2 |
| INTRAVESICAL IMMUNOTHERAPY                           | 10080771 | 2 |
| INCORRECT DOSE ADMINISTERED BY PRODUCT               | 10080804 | 2 |
| VON WILLEBRAND'S FACTOR ANTIBODY                     | 10080829 | 2 |
| HYPERAROUSAL                                         | 10080831 | 2 |
| HTLV TEST                                            | 10080854 | 2 |
| PHYSICAL CAPACITY EVALUATION                         | 10080885 | 2 |
| DEHISCENCE                                           | 10080904 | 2 |
| KLEBSIELLA TEST                                      | 10080943 | 2 |
| TISSUE RUPTURE                                       | 10080972 | 2 |
| RED BLOOD CELL SPHEROCYTES                           | 10080980 | 2 |
| DENGUE VIRUS TEST NEGATIVE                           | 10081043 | 2 |
| OZONE THERAPY                                        | 10081102 | 2 |
| INTENTIONAL REMOVAL OF DRUG DELIVERY SYSTEM BY PATIE | 10081134 | 2 |
| GALLBLADDER RUPTURE                                  | 10081151 | 2 |
| DIGESTIVE ENZYME TEST                                | 10081157 | 2 |

|                                                   |          |   |
|---------------------------------------------------|----------|---|
| DIGESTIVE ENZYME ABNORMAL                         | 10081159 | 2 |
| AIRWAY PATENCY DEVICE INSERTION                   | 10081227 | 2 |
| NEUROLOGICAL PROCEDURAL COMPLICATION              | 10081338 | 2 |
| PRODUCT RESIDUE PRESENT                           | 10081359 | 2 |
| HELIOTROPE RASH                                   | 10081454 | 2 |
| ELECTROCARDIOGRAM PR SEGMENT DEPRESSION           | 10081493 | 2 |
| VERTEBRAL LATERAL RECESS STENOSIS                 | 10081612 | 2 |
| CHEMOKINE INCREASED                               | 10081663 | 2 |
| EYE PH TEST                                       | 10081702 | 2 |
| ARTERIAL ANGIOPLASTY                              | 10081731 | 2 |
| JUGULAR VEIN EMBOLISM                             | 10081850 | 2 |
| GROWTH DISORDER                                   | 10081945 | 2 |
| NEUROPROSTHESIS IMPLANTATION                      | 10081968 | 2 |
| COLD BURN                                         | 10081985 | 2 |
| SPINAL STROKE                                     | 10082031 | 2 |
| SIGMOID-SHAPED VENTRICULAR SEPTUM                 | 10082038 | 2 |
| GREY MATTER HETEROTOPIA                           | 10082084 | 2 |
| ACUTE FLACCID MYELITIS                            | 10082097 | 2 |
| HEART RATE VARIABILITY DECREASED                  | 10082111 | 2 |
| ACQUIRED BLASCHKOID DERMATITIS                    | 10082113 | 2 |
| INCISION SITE DISCHARGE                           | 10082296 | 2 |
| EXTERNAL VAGAL NERVE STIMULATION                  | 10082451 | 2 |
| STARVATION KETOACIDOSIS                           | 10082528 | 2 |
| TONGUE THRUST                                     | 10082545 | 2 |
| PLASMINOGEN ACTIVATOR INHIBITOR TYPE 1 DEFICIENCY | 10082567 | 2 |
| INFUSION RELATED HYPERSENSITIVITY REACTION        | 10082742 | 2 |
| PHRENIC NERVE INJURY                              | 10082761 | 2 |
| ACHROMOBACTER INFECTION                           | 10082866 | 2 |
| FAECAL ELASTASE TEST                              | 10082867 | 2 |
| BILIARY CATHETER INSERTION                        | 10082920 | 2 |
| COMPUTERISED TOMOGRAM PANCREAS NORMAL             | 10082935 | 2 |
| POST PROCEDURAL ERYTHEMA                          | 10082944 | 2 |
| MUCOCUTANEOUS DISORDER                            | 10082980 | 2 |
| EYELID SCAR                                       | 10082987 | 2 |
| IMMUNE-MEDIATED MYOSITIS                          | 10083073 | 2 |
| ORBITAL SPACE OCCUPYING LESION                    | 10083097 | 2 |
| URINARY TRACT CANDIDIASIS                         | 10083162 | 2 |
| CORNEAL PACHYMETRY                                | 10083168 | 2 |
| HEMIDYSAESTHESIA                                  | 10083174 | 2 |
| HER2 NEGATIVE BREAST CANCER                       | 10083232 | 2 |
| FIBRONECTIN                                       | 10083290 | 2 |
| FIBRONECTIN NORMAL                                | 10083291 | 2 |
| PELVIC GIRDLE PAIN                                | 10083336 | 2 |

|                                             |          |   |
|---------------------------------------------|----------|---|
| DRUG EFFECT LESS THAN EXPECTED              | 10083365 | 2 |
| SUBCAPSULAR SPLENIC HAEMATOMA               | 10083384 | 2 |
| OUT OF SPECIFICATION PRODUCT USE            | 10083420 | 2 |
| ELECTROCARDIOGRAM RR INTERVAL               | 10083424 | 2 |
| VULVOVAGINAL EXFOLIATION                    | 10083435 | 2 |
| BLOOD BETA-D-GLUCAN POSITIVE                | 10083491 | 2 |
| ILEOCAECAL RESECTION                        | 10083501 | 2 |
| ORAL PURPURA                                | 10083533 | 2 |
| ADMINISTRATION SITE WOUND                   | 10083594 | 2 |
| SUNSCREEN SENSITIVITY                       | 10083629 | 2 |
| MENINGEAL THICKENING                        | 10083667 | 2 |
| DEVICE TEMPERATURE ISSUE                    | 10083711 | 2 |
| COINFECTION                                 | 10083750 | 2 |
| BULLOUS HAEMORRHAGIC DERMATOSIS             | 10083809 | 2 |
| ORAL LICHENOID REACTION                     | 10083833 | 2 |
| FOREIGN BODY IN SKIN OR SUBCUTANEOUS TISSUE | 10083982 | 2 |
| DEVICE PLACEMENT ISSUE                      | 10083995 | 2 |
| NUTRITIONAL SUPPLEMENT ALLERGY              | 10084049 | 2 |
| MANIC SYMPTOM                               | 10084119 | 2 |
| ANAL ERYTHEMA                               | 10084122 | 2 |
| ANTI-THYROID ANTIBODY DECREASED             | 10084158 | 2 |
| MONTREAL COGNITIVE ASSESSMENT ABNORMAL      | 10084205 | 2 |
| COMPARTMENT PRESSURE TEST                   | 10084233 | 2 |
| PLATELET AGGREGATION TEST                   | 10084286 | 2 |
| DIVERTICULITIS INTESTINAL PERFORATED        | 10084304 | 2 |
| IMMOBILISATION SYNDROME                     | 10084349 | 2 |
| CORONAVIRUS PNEUMONIA                       | 10084381 | 2 |
| PRODUCT DELIVERY MECHANISM ISSUE            | 10084427 | 2 |
| SACROILIAC JOINT DYSFUNCTION                | 10084449 | 2 |
| EYELID CYST REMOVAL                         | 10084552 | 2 |
| SARS-COV-2 SEPSIS                           | 10084639 | 2 |
| INTRATYMPANIC INJECTION                     | 10084734 | 2 |
| TEMPORARY MECHANICAL CIRCULATORY SUPPORT    | 10084745 | 2 |
| PROCEDURE ABORTED                           | 10084762 | 2 |
| SUPERIMPOSED PRE-ECLAMPSIA                  | 10084825 | 2 |
| PHANTOM VIBRATION SYNDROME                  | 10085176 | 2 |
| TEMPORARY TRANSVENOUS PACING                | 10085182 | 2 |
| FULL BLOOD COUNT INCREASED                  | 10052239 | 2 |
| LDL/HDL RATIO DECREASED                     | 10052338 | 2 |
| BILIARY SPHINCTEROTOMY                      | 10052378 | 2 |
| DILATATION INTRAHEPATIC DUCT ACQUIRED       | 10052383 | 2 |
| NEUROENDOCRINE TUMOUR                       | 10052399 | 2 |
| OEDEMATOUS PANCREATITIS                     | 10052400 | 2 |

|                                                 |          |   |
|-------------------------------------------------|----------|---|
| SMALL INTESTINAL HAEMORRHAGE                    | 10052535 | 2 |
| COMMINUTED FRACTURE                             | 10052614 | 2 |
| CANCER GENE CARRIER                             | 10052648 | 2 |
| TRABECULOPLASTY                                 | 10052697 | 2 |
| CATHETERISATION VENOUS                          | 10052698 | 2 |
| AEROPHAGIA                                      | 10052813 | 2 |
| EOSINOPHILIC PNEUMONIA ACUTE                    | 10052832 | 2 |
| EOSINOPHILIC PNEUMONIA CHRONIC                  | 10052833 | 2 |
| LABOUR STIMULATION                              | 10052855 | 2 |
| DENTAL IMPRESSION PROCEDURE                     | 10052943 | 2 |
| PHYSIOTHERAPY CHEST                             | 10052961 | 2 |
| LOOP ELECTROSURGICAL EXCISION PROCEDURE         | 10052976 | 2 |
| LESION EXCISION                                 | 10052979 | 2 |
| PERICARDIAL REPAIR                              | 10053066 | 2 |
| SIGHT DISABILITY                                | 10053154 | 2 |
| GENITAL CYST                                    | 10053178 | 2 |
| ILIAC ARTERY STENOSIS                           | 10053216 | 2 |
| RHINOSCOPY                                      | 10053344 | 2 |
| BLOOD PRESSURE ORTHOSTATIC ABNORMAL             | 10053354 | 2 |
| BLOOD PRESSURE ORTHOSTATIC INCREASED            | 10053355 | 2 |
| PROGRESSIVE MULTIPLE SCLEROSIS                  | 10053395 | 2 |
| CLONIC CONVULSION                               | 10053398 | 2 |
| BENIGN TUMOUR EXCISION                          | 10053435 | 2 |
| CARDIAC VENTRICULOGRAM                          | 10053445 | 2 |
| ANALGESIC THERAPY                               | 10053469 | 2 |
| TRAUMATIC HAEMORRHAGE                           | 10053476 | 2 |
| PHYSICAL BREAST EXAMINATION ABNORMAL            | 10053480 | 2 |
| BRONCHOPLEURAL FISTULA                          | 10053481 | 2 |
| PACEMAKER GENERATED ARRHYTHMIA                  | 10053486 | 2 |
| CARDIAC VENTRICULOGRAM LEFT NORMAL              | 10053498 | 2 |
| SCAN BONE MARROW ABNORMAL                       | 10053504 | 2 |
| URINE PROTEIN/CREATININE RATIO NORMAL           | 10053540 | 2 |
| URINE ALBUMIN/CREATININE RATIO INCREASED        | 10053541 | 2 |
| FOETAL CEREBROVASCULAR DISORDER                 | 10053601 | 2 |
| FREE HAEMOGLOBIN                                | 10053626 | 2 |
| IIIIRD NERVE DISORDER                           | 10053644 | 2 |
| ARTIFICIAL HEART DEVICE USER                    | 10053667 | 2 |
| KINESITHERAPY                                   | 10053688 | 2 |
| CARDIOVASCULAR AUTONOMIC FUNCTION TEST ABNORMAL | 10053691 | 2 |
| SACCADIC EYE MOVEMENT                           | 10053694 | 2 |
| FOETAL MACROSOMIA                               | 10053700 | 2 |
| SPINAL NERVE STIMULATOR IMPLANTATION            | 10053714 | 2 |
| SIGMOIDECTOMY                                   | 10053770 | 2 |

|                                               |          |   |
|-----------------------------------------------|----------|---|
| TRI-IODOTHYRONINE FREE DECREASED              | 10053791 | 2 |
| TRI-IODOTHYRONINE FREE ABNORMAL               | 10053794 | 2 |
| BLOOD 1,25-DIHYDROXYCHOLECALCIFEROL DECREASED | 10053811 | 2 |
| BLOOD 25-HYDROXYCHOLECALCIFEROL DECREASED     | 10053813 | 2 |
| AGONAL RHYTHM                                 | 10054015 | 2 |
| LIPOPROTEIN (A) NORMAL                        | 10054022 | 2 |
| PNEUMOCOCCAL SEPSIS                           | 10054047 | 2 |
| OESTROGEN RECEPTOR ASSAY POSITIVE             | 10054054 | 2 |
| OESTROGEN RECEPTOR ASSAY NEGATIVE             | 10054055 | 2 |
| PERIHEPATIC DISCOMFORT                        | 10054125 | 2 |
| TETANUS IMMUNISATION                          | 10054131 | 2 |
| SUPERIOR MESENTERIC ARTERY SYNDROME           | 10054156 | 2 |
| ACID FAST BACILLI INFECTION                   | 10054204 | 2 |
| ENTEROBACTER PNEUMONIA                        | 10054218 | 2 |
| ALPHA HAEMOLYTIC STREPTOCOCCAL INFECTION      | 10054265 | 2 |
| HELICOBACTER GASTRITIS                        | 10054272 | 2 |
| DISORDER OF ORBIT                             | 10054717 | 2 |
| REGRESSIVE BEHAVIOUR                          | 10054720 | 2 |
| CORNEAL THINNING                              | 10054760 | 2 |
| MAXILLOFACIAL OPERATION                       | 10054806 | 2 |
| LIPASE ABNORMAL                               | 10054821 | 2 |
| TUBO-OVARIAN ABSCESS                          | 10054824 | 2 |
| MORGANELLA INFECTION                          | 10054876 | 2 |
| VASCULAR INSUFFICIENCY                        | 10054880 | 2 |
| METAPLASIA                                    | 10054949 | 2 |
| PANCREATIC ENLARGEMENT                        | 10055024 | 2 |
| SWEAT GLAND INFECTION                         | 10055027 | 2 |
| INTERVERTEBRAL DISC INJURY                    | 10055040 | 2 |
| THYROID CANCER METASTATIC                     | 10055107 | 2 |
| HEPATIC CANCER METASTATIC                     | 10055110 | 2 |
| ECZEMA WEEPING                                | 10055182 | 2 |
| HEPATIC EMBOLISATION                          | 10056203 | 2 |
| RED BLOOD CELL VACUOLISATION                  | 10056210 | 2 |
| WEAN FROM VENTILATOR                          | 10056353 | 2 |
| CUBITAL TUNNEL SYNDROME                       | 10056473 | 2 |
| PRE-EXISTING DISEASE                          | 10056486 | 2 |
| THERAPEUTIC ASPIRATION                        | 10056553 | 2 |
| URINE ALCOHOL TEST                            | 10056564 | 2 |
| URINE ALCOHOL TEST NEGATIVE                   | 10056565 | 2 |
| VESTIBULITIS                                  | 10056651 | 2 |
| LYMPHOMATOID PAPULOSIS                        | 10056670 | 2 |
| GENITAL DISCHARGE                             | 10056740 | 2 |
| RECTAL EXAMINATION ABNORMAL                   | 10056824 | 2 |

|                                        |          |   |
|----------------------------------------|----------|---|
| HYDROCHOLECYSTIS                       | 10056972 | 2 |
| RECTAL SPASM                           | 10057011 | 2 |
| PNEUMATOSIS INTESTINALIS               | 10057030 | 2 |
| URINE URIC ACID DECREASED              | 10057139 | 2 |
| T-LYMPHOCYTE COUNT INCREASED           | 10057264 | 2 |
| PARVOVIRUS INFECTION                   | 10057343 | 2 |
| REHABILITATION THERAPY                 | 10057374 | 2 |
| RETINAL INJURY                         | 10057430 | 2 |
| VASCULAR PROCEDURE COMPLICATION        | 10057462 | 2 |
| HYPERBARIC OXYGEN THERAPY              | 10057480 | 2 |
| VISUAL TRACKING TEST ABNORMAL          | 10057515 | 2 |
| PERIPHERAL ARTERY ANGIOPLASTY          | 10057518 | 2 |
| PURPURA NON-THROMBOCYTOPENIC           | 10057739 | 2 |
| HAEMATOLOGY TEST ABNORMAL              | 10057755 | 2 |
| VERTEBRAL ARTERY THROMBOSIS            | 10057777 | 2 |
| PERITONEAL LAVAGE                      | 10057837 | 2 |
| NICOTINE DEPENDENCE                    | 10057852 | 2 |
| ANTICONVULSANT DRUG LEVEL DECREASED    | 10057857 | 2 |
| SELECTIVE IGG SUBCLASS DEFICIENCY      | 10057863 | 2 |
| PHARYNGITIS BACTERIAL                  | 10057869 | 2 |
| VENTRICULAR INTERNAL DIAMETER ABNORMAL | 10057922 | 2 |
| BAND NEUTROPHIL COUNT DECREASED        | 10057950 | 2 |
| INFECTIVE THROMBOSIS                   | 10058016 | 2 |
| WOUND SEPSIS                           | 10058041 | 2 |
| WOUND ABSCESS                          | 10058042 | 2 |
| NEUTROPHILIC DERMATOSIS                | 10058105 | 2 |
| NEPHROGENIC ANAEMIA                    | 10058116 | 2 |
| NEUTROPHIL PERCENTAGE ABNORMAL         | 10058134 | 2 |
| HEART ALTERNATION                      | 10058155 | 2 |
| GALLBLADDER ADENOCARCINOMA             | 10058286 | 2 |
| RETROPERITONEAL HAEMATOMA              | 10058360 | 2 |
| BIOPSY INTESTINE NORMAL                | 10058399 | 2 |
| DERMATOLOGIC EXAMINATION NORMAL        | 10058407 | 2 |
| ARTIFICIAL CROWN PROCEDURE             | 10058456 | 2 |
| OESOPHAGEAL INJURY                     | 10058522 | 2 |
| TOTAL CHOLESTEROL/HDL RATIO NORMAL     | 10058634 | 2 |
| CYTOMEGALOVIRUS INFECTION REACTIVATION | 10058666 | 2 |
| PELVIC INFECTION                       | 10058674 | 2 |
| UTERINE CERVICAL PAIN                  | 10058704 | 2 |
| CEREBROVASCULAR INSUFFICIENCY          | 10058842 | 2 |
| PNEUMOCOCCAL BACTERAEMIA               | 10058859 | 2 |
| HEART VALVE CALCIFICATION              | 10058968 | 2 |
| JOINT ABSCESS                          | 10058981 | 2 |



|                                          |          |   |
|------------------------------------------|----------|---|
| ORGAN DONOR                              | 10058985 | 2 |
| RIB DEFORMITY                            | 10059011 | 2 |
| NEOPLASM SWELLING                        | 10059049 | 2 |
| MEDICAL DEVICE PAIN                      | 10059057 | 2 |
| VIBRATION TEST ABNORMAL                  | 10059101 | 2 |
| INFUSION SITE BRUISING                   | 10059203 | 2 |
| JAW OPERATION                            | 10059242 | 2 |
| URINE CYTOLOGY                           | 10059263 | 2 |
| URINE CYTOLOGY NORMAL                    | 10059264 | 2 |
| EPIDERMAL NECROSIS                       | 10059284 | 2 |
| INCISION SITE PRURITUS                   | 10059386 | 2 |
| BREAST INJURY                            | 10059391 | 2 |
| ACANTHOMA                                | 10059394 | 2 |
| PAROPHTHALMIA                            | 10059407 | 2 |
| PROLONGED EXPIRATION                     | 10059411 | 2 |
| PARANEOPLASTIC SYNDROME                  | 10059420 | 2 |
| SKIN NEOPLASM EXCISION                   | 10059443 | 2 |
| MYELOCYTE PERCENTAGE                     | 10059470 | 2 |
| PALLIATIVE CARE                          | 10059513 | 2 |
| RETINOGRAM NORMAL                        | 10059662 | 2 |
| HISTONE ANTIBODY                         | 10059695 | 2 |
| CSF MYELIN BASIC PROTEIN INCREASED       | 10059754 | 2 |
| RUSSELL'S VIPER VENOM TIME ABNORMAL      | 10059759 | 2 |
| PNEUMATIC COMPRESSION THERAPY            | 10059829 | 2 |
| CARDIAC RESYNCHRONISATION THERAPY        | 10059862 | 2 |
| CYTOGENETIC ANALYSIS ABNORMAL            | 10059887 | 2 |
| BLOOD 1,25-DIHYDROXYCHOLECALCIFEROL      | 10059897 | 2 |
| GLUCOSE-6-PHOSPHATE DEHYDROGENASE NORMAL | 10059901 | 2 |
| PORPHYRINS URINE NORMAL                  | 10059911 | 2 |
| RED BLOOD CELL ANISOCYTES PRESENT        | 10059915 | 2 |
| RED BLOOD CELL POIKILOCYTES PRESENT      | 10059947 | 2 |
| ALBUMIN CSF                              | 10059953 | 2 |
| TOTAL BILE ACIDS                         | 10059962 | 2 |
| 5-HYDROXYINDOLACETIC ACID IN URINE       | 10059972 | 2 |
| ALBUMIN CSF NORMAL                       | 10059977 | 2 |
| ALBUMIN CSF INCREASED                    | 10059978 | 2 |
| PLASMIN INHIBITOR                        | 10059980 | 2 |
| B-LYMPHOCYTE COUNT INCREASED             | 10059998 | 2 |
| MEASLES ANTIBODY                         | 10060066 | 2 |
| BLOOD MERCURY                            | 10060067 | 2 |
| BLOOD MERCURY NORMAL                     | 10060092 | 2 |
| BLOOD MERCURY ABNORMAL                   | 10060093 | 2 |
| PARASITE BLOOD TEST POSITIVE             | 10060124 | 2 |

|                                                    |          |   |
|----------------------------------------------------|----------|---|
| ANTIPSYCHOTIC DRUG LEVEL BELOW THERAPEUTIC         | 10060145 | 2 |
| PROTEIN C INCREASED                                | 10060230 | 2 |
| PULMONARY ARTERIAL PRESSURE NORMAL                 | 10060232 | 2 |
| GASTROINTESTINAL EROSION                           | 10060709 | 2 |
| LYMPHOCYTE STIMULATION TEST NEGATIVE               | 10060759 | 2 |
| HEPATIC ENZYME DECREASED                           | 10060794 | 2 |
| WHITE BLOOD CELL MORPHOLOGY NORMAL                 | 10060798 | 2 |
| CHOROIDAL NEOVASCULARISATION                       | 10060823 | 2 |
| HUMAN HERPES VIRUS 6 SEROLOGY POSITIVE             | 10060827 | 2 |
| RECALL PHENOMENON                                  | 10060856 | 2 |
| LIGHT CHAIN ANALYSIS ABNORMAL                      | 10060867 | 2 |
| DIFFUSE ALVEOLAR DAMAGE                            | 10060902 | 2 |
| BASE EXCESS NEGATIVE                               | 10060915 | 2 |
| FOETAL MALFORMATION                                | 10060919 | 2 |
| INTRAOCULAR PRESSURE TEST NORMAL                   | 10060952 | 2 |
| BENIGN UTERINE NEOPLASM                            | 10061007 | 2 |
| CEREBELLAR HAEMATOMA                               | 10061038 | 2 |
| COLON NEOPLASM                                     | 10061045 | 2 |
| CSF WHITE BLOOD CELL COUNT POSITIVE                | 10061100 | 2 |
| DRUG ABUSER                                        | 10061111 | 2 |
| DRUG LEVEL THERAPEUTIC                             | 10061134 | 2 |
| SPONTANEOUS BACTERIAL PERITONITIS                  | 10061135 | 2 |
| GENITAL HAEMORRHAGE                                | 10061178 | 2 |
| HAEMODYNAMIC TEST                                  | 10061189 | 2 |
| HEAD DEFORMITY                                     | 10061199 | 2 |
| HELMINTHIC INFECTION                               | 10061201 | 2 |
| LARGE INTESTINAL ULCER HAEMORRHAGE                 | 10061262 | 2 |
| MANTLE CELL LYMPHOMA                               | 10061275 | 2 |
| MEDIASTINAL DISORDER                               | 10061280 | 2 |
| MENINGEAL DISORDER                                 | 10061281 | 2 |
| MENTAL DISORDER DUE TO A GENERAL MEDICAL CONDITION | 10061285 | 2 |
| MYRINGITIS                                         | 10061302 | 2 |
| OPTIC DISC DISORDER                                | 10061321 | 2 |
| PERICARDIAL DISEASE                                | 10061338 | 2 |
| PNEUMOCOCCAL INFECTION                             | 10061353 | 2 |
| TRAUMATIC INTRACRANIAL HAEMORRHAGE                 | 10061387 | 2 |
| URTICARIA THERMAL                                  | 10061399 | 2 |
| WRIST DEFORMITY                                    | 10061415 | 2 |
| CYST ASPIRATION ABNORMAL                           | 10061420 | 2 |
| RETINAL FUNCTION TEST NORMAL                       | 10061463 | 2 |
| RADIOISOTOPE SCAN                                  | 10061478 | 2 |
| REPRODUCTIVE TRACT DISORDER                        | 10061483 | 2 |
| PLATELET FUNCTION TEST ABNORMAL                    | 10061539 | 2 |

|                                                    |          |   |
|----------------------------------------------------|----------|---|
| PLATELET FUNCTION TEST NORMAL                      | 10061540 | 2 |
| FACTITIOUS DISORDER                                | 10061595 | 2 |
| ABDOMINAL WALL OPERATION                           | 10061611 | 2 |
| ABORTION SPONTANEOUS INCOMPLETE                    | 10061617 | 2 |
| PLATELET FUNCTION TEST                             | 10061684 | 2 |
| BLOOD URIC ACID ABNORMAL                           | 10061727 | 2 |
| BONE MARROW TRANSPLANT                             | 10061730 | 2 |
| CATECHOLAMINES URINE NORMAL                        | 10061749 | 2 |
| COMPLICATION OF DELIVERY                           | 10061781 | 2 |
| DETOXIFICATION                                     | 10061814 | 2 |
| EAR OPERATION                                      | 10061831 | 2 |
| EXTRANODAL MARGINAL ZONE B-CELL LYMPHOMA (MALT TYP | 10061850 | 2 |
| EYELID OPERATION                                   | 10061853 | 2 |
| NEOPLASM RECURRENCE                                | 10061864 | 2 |
| NON-SMALL CELL LUNG CANCER                         | 10061873 | 2 |
| PANCREATIC ENZYMES NORMAL                          | 10061901 | 2 |
| SALIVARY GLAND CANCER                              | 10061934 | 2 |
| LIVER SCAN NORMAL                                  | 10061948 | 2 |
| RENAL SCAN NORMAL                                  | 10061954 | 2 |
| GASTRITIS BACTERIAL                                | 10061971 | 2 |
| LYMPHATIC SYSTEM NEOPLASM                          | 10062044 | 2 |
| HISTOLOGY NORMAL                                   | 10062058 | 2 |
| REDUCTION OF INCREASED INTRACRANIAL PRESSURE       | 10062101 | 2 |
| RESPIRATORY GAS EXCHANGE DISORDER                  | 10062105 | 2 |
| WHITE BLOOD CELL MORPHOLOGY ABNORMAL               | 10062137 | 2 |
| URINARY SYSTEM X-RAY NORMAL                        | 10062139 | 2 |
| SPLEEN SCAN NORMAL                                 | 10062143 | 2 |
| THYROID GLAND SCAN NORMAL                          | 10062150 | 2 |
| VENOUS ANEURYSM                                    | 10062174 | 2 |
| VIRAL LOAD INCREASED                               | 10062180 | 2 |
| URINE ELECTROLYTES                                 | 10062229 | 2 |
| ELECTROCARDIOGRAM LOW VOLTAGE                      | 10062311 | 2 |
| LIPOHYPERTROPHY                                    | 10062315 | 2 |
| CONGENITAL CEREBROVASCULAR ANOMALY                 | 10062327 | 2 |
| LEUKAEMIA RECURRENT                                | 10062489 | 2 |
| TRACHEAL HAEMORRHAGE                               | 10062543 | 2 |
| THROMBOSIS IN DEVICE                               | 10062546 | 2 |
| ENTEROVESICAL FISTULA                              | 10062570 | 2 |
| ENDOCARDITIS NONINFECTIVE                          | 10062608 | 2 |
| ISCHAEMIC LIMB PAIN                                | 10062610 | 2 |
| METAMYELOCYTE PERCENTAGE INCREASED                 | 10062649 | 2 |
| ERYTHROCYTE OSMOTIC FRAGILITY TEST                 | 10062724 | 2 |
| ULTRASOUND THERAPY                                 | 10062749 | 2 |

|                                            |          |   |
|--------------------------------------------|----------|---|
| CAECECTOMY                                 | 10062859 | 2 |
| PLACENTA ACCRETA                           | 10062936 | 2 |
| ABDOMINAL WALL MASS                        | 10063005 | 2 |
| PROGESTERONE ABNORMAL                      | 10063270 | 2 |
| LYMPHOCYTE PERCENTAGE ABNORMAL             | 10063337 | 2 |
| INFANTILE SPITTING UP                      | 10063338 | 2 |
| INTERNATIONAL NORMALISED RATIO FLUCTUATION | 10063351 | 2 |
| VASCULAR STENT INSERTION                   | 10063382 | 2 |
| HEPATITIS B ANTIGEN POSITIVE               | 10063411 | 2 |
| HEPATITIS B ANTIGEN                        | 10063414 | 2 |
| ROTAVIRUS TEST                             | 10063459 | 2 |
| ROTAVIRUS TEST NEGATIVE                    | 10063460 | 2 |
| VARICELLA POST VACCINE                     | 10063522 | 2 |
| ALLERGIC RESPIRATORY DISEASE               | 10063532 | 2 |
| RENAL EMBOLISM                             | 10063544 | 2 |
| PULMONARY ARTERY WALL HYPERTROPHY          | 10063561 | 2 |
| OTOACOUSTIC EMISSIONS TEST                 | 10063567 | 2 |
| EXPOSURE TO CONTAMINATED AIR               | 10063600 | 2 |
| LIFE EXPECTANCY SHORTENED                  | 10063750 | 2 |
| IMPLANT SITE PRURITUS                      | 10063785 | 2 |
| PELVIC FLOOR MUSCLE WEAKNESS               | 10064026 | 2 |
| LIMB CRUSHING INJURY                       | 10064031 | 2 |
| BIOPSY TONSIL                              | 10064045 | 2 |
| POLYMENORRHAGIA                            | 10064050 | 2 |
| PUNCTAL PLUG INSERTION                     | 10064120 | 2 |
| HAND-ARM VIBRATION SYNDROME                | 10064140 | 2 |
| DENTAL IMPLANTATION                        | 10064143 | 2 |
| FIBRONECTIN INCREASED                      | 10064166 | 2 |
| FIBRONECTIN DECREASED                      | 10064167 | 2 |
| ELECTIVE PROCEDURE                         | 10064263 | 2 |
| BLADDER NEOPLASM SURGERY                   | 10064272 | 2 |
| INCORRECT DRUG ADMINISTRATION RATE         | 10064306 | 2 |
| INTERCEPTED MEDICATION ERROR               | 10064382 | 2 |
| MONOFILAMENT PRESSURE PERCEPTION TEST      | 10064511 | 2 |
| PERIODIC LIMB MOVEMENT DISORDER            | 10064600 | 2 |
| MACROPHAGES INCREASED                      | 10064665 | 2 |
| FAECAL VOMITING                            | 10064670 | 2 |
| EPIRETINAL MEMBRANE                        | 10064697 | 2 |
| INFUSION SITE EXTRAVASATION                | 10064774 | 2 |
| PLATELETCRIT                               | 10064782 | 2 |
| ABSCCESS RUPTURE                           | 10064878 | 2 |
| CYSTATIN C                                 | 10064988 | 2 |
| NECROTISING RETINITIS                      | 10064997 | 2 |

|                                             |          |   |
|---------------------------------------------|----------|---|
| UTERINE CERVIX DILATION PROCEDURE           | 10064999 | 2 |
| IMMUNE RECONSTITUTION INFLAMMATORY SYNDROME | 10065042 | 2 |
| UROGRAM ABNORMAL                            | 10065097 | 2 |
| EPSTEIN-BARR VIRAEemia                      | 10065110 | 2 |
| LIGAMENT OPERATION                          | 10065122 | 2 |
| VERTEBRAL WEDGING                           | 10065317 | 2 |
| MAGNETIC THERAPY                            | 10065343 | 2 |
| BURNOUT SYNDROME                            | 10065369 | 2 |
| VON WILLEBRAND'S FACTOR ANTIGEN INCREASED   | 10065374 | 2 |
| CORONARY ARTERY DILATATION                  | 10065420 | 2 |
| MINI MENTAL STATUS EXAMINATION ABNORMAL     | 10065424 | 2 |
| NIH STROKE SCALE SCORE DECREASED            | 10065529 | 2 |
| BLOOD PRODUCT TRANSFUSION DEPENDENT         | 10065535 | 2 |
| MESENTERIC ARTERIOSCLEROSIS                 | 10065560 | 2 |
| RHEGMATOGENOUS RETINAL DETACHMENT           | 10065569 | 2 |
| FEMALE SEX HORMONE LEVEL ABNORMAL           | 10065596 | 2 |
| INTESTINAL CONGESTION                       | 10065611 | 2 |
| INCISION SITE ERYTHEMA                      | 10065615 | 2 |
| LIP INFECTION                               | 10065755 | 2 |
| GASTROINTESTINAL ANASTOMOTIC LEAK           | 10065879 | 2 |
| PREHYPERTENSION                             | 10065918 | 2 |
| LEFT VENTRICLE OUTFLOW TRACT OBSTRUCTION    | 10065930 | 2 |
| PNEUMOBILIA                                 | 10066004 | 2 |
| PHALEN'S TEST POSITIVE                      | 10066039 | 2 |
| DYSMORPHISM                                 | 10066054 | 2 |
| PARADOXICAL EMBOLISM                        | 10066059 | 2 |
| SUBSTANCE ABUSE                             | 10066169 | 2 |
| INJECTION SITE ECZEMA                       | 10066221 | 2 |
| COMPULSIVE LIP BITING                       | 10066241 | 2 |
| INTERLEUKIN-2 RECEPTOR INCREASED            | 10066315 | 2 |
| PLEURAL DECORTICATION                       | 10066322 | 2 |
| RECTAL TUBE INSERTION                       | 10066323 | 2 |
| CONTINUOUS HAEMODIAFILTRATION               | 10066338 | 2 |
| HYPERSEXUALITY                              | 10066364 | 2 |
| MATERNAL DEATH DURING CHILDBIRTH            | 10066376 | 2 |
| INFRARED THERAPY                            | 10066385 | 2 |
| PULMONARY VENOUS HYPERTENSION               | 10085364 | 2 |
| MYXOMA                                      | 10085372 | 2 |
| NECROTIC LYMPHADENOPATHY                    | 10085419 | 2 |
| SARS-COV-2 RNA FLUCTUATION                  | 10085497 | 2 |
| CEREBELLAR TONSILLAR ECTOPIA                | 10085525 | 2 |
| CUPPING THERAPY                             | 10085708 | 2 |
| UTERINE ARTERY EMBOLISATION                 | 10085781 | 2 |

|                                                    |          |   |
|----------------------------------------------------|----------|---|
| MYELIN OLIGODENDROCYTE GLYCOPROTEIN ANTIBODY-ASSOC | 10085806 | 2 |
| LOW LUNG COMPLIANCE                                | 10086117 | 2 |
| ANTI-PLATELET FACTOR 4 ANTIBODY TEST               | 10086159 | 2 |
| 17-HYDROXYPROGESTERONE                             | 10086164 | 2 |
| RUBULAVIRUS TEST                                   | 10086209 | 2 |
| ORAL CAVITY EXAMINATION                            | 10086211 | 2 |
| MYOCARDIAL STRAIN IMAGING                          | 10086297 | 2 |
| PELVIC ORGAN PROLAPSE                              | 10086381 | 2 |
| OPHTHALMIC ARTERY ANEURYSM                         | 10086406 | 2 |
| BOWEL OBSTRUCTION SURGERY                          | 10086417 | 2 |
| PRODUCT DOSE CONFUSION                             | 10086483 | 2 |
| CANCER SCREENING                                   | 10086509 | 2 |
| ASIA SYNDROME                                      | 10086562 | 2 |
| PULMONARY SEPTAL THICKENING                        | 10086984 | 2 |
| WARM AUTOIMMUNE HAEMOLYTIC ANAEMIA                 | 10087091 | 2 |
| VIBRATION SYNDROME                                 | 10087138 | 2 |
| SUPERFICIAL INFLAMMATORY DERMATOSIS                | 10087164 | 2 |
| URINE ANTIGEN TEST                                 | 10087202 | 2 |
| CONTRAST ECHOCARDIOGRAM                            | 10087512 | 2 |
| ABDOMEN CRUSHING                                   | 10000044 | 1 |
| ABNORMAL LABOUR                                    | 10000153 | 1 |
| ABNORMAL PALMAR/PLANTAR CREASES                    | 10000162 | 1 |
| ABORTION INCOMPLETE                                | 10000217 | 1 |
| ABSCESS OF EYELID                                  | 10000297 | 1 |
| ABSCESS STERILE                                    | 10000317 | 1 |
| ACID BASE BALANCE                                  | 10000456 | 1 |
| ACIDOSIS HYPERCHLORAEMIC                           | 10000489 | 1 |
| ACRODYNIA                                          | 10000598 | 1 |
| ACTIVATED PARTIAL THROMBOPLASTIN TIME ABNORMAL     | 10000631 | 1 |
| ACUTE FATTY LIVER OF PREGNANCY                     | 10000746 | 1 |
| ACUTE HIV INFECTION                                | 10000807 | 1 |
| ACUTE MEGAKARYOCYTIC LEUKAEMIA                     | 10000860 | 1 |
| ACUTE MONOCYTIC LEUKAEMIA                          | 10000871 | 1 |
| ACUTE MYELOMONOCYTIC LEUKAEMIA                     | 10000890 | 1 |
| ADENOCARCINOMA GASTRIC                             | 10001150 | 1 |
| ADENOCARCINOMA OF COLON                            | 10001167 | 1 |
| ADENOIDECTOMY                                      | 10001230 | 1 |
| AGRANULOCYTOSIS                                    | 10001507 | 1 |
| AIR EMBOLISM                                       | 10001526 | 1 |
| ALBUMIN GLOBULIN RATIO ABNORMAL                    | 10001563 | 1 |
| ALBUMINURIA                                        | 10001580 | 1 |
| ALCOHOL PROBLEM                                    | 10001606 | 1 |
| ALCOHOLIC                                          | 10001612 | 1 |

|                                             |          |   |
|---------------------------------------------|----------|---|
| ALCOHOLIC HANGOVER                          | 10001623 | 1 |
| ALCOHOLIC LIVER DISEASE                     | 10001627 | 1 |
| ALDOLASE DECREASED                          | 10001641 | 1 |
| ALLERGY TO VENOM                            | 10001751 | 1 |
| ALOPECIA SCARRING                           | 10001764 | 1 |
| ALPHA 2 GLOBULIN DECREASED                  | 10001794 | 1 |
| ALPHA-1 ANTI-TRYPSIN DECREASED              | 10001805 | 1 |
| ALPHA-1 ANTI-TRYPSIN INCREASED              | 10001808 | 1 |
| ALPHA-2 MACROGLOBULIN INCREASED             | 10001814 | 1 |
| ALVEOLITIS                                  | 10001889 | 1 |
| AMYOTROPHY                                  | 10002027 | 1 |
| ANAEMIA MEGALOBLASTIC                       | 10002065 | 1 |
| ANAEMIA VITAMIN B12 DEFICIENCY              | 10002080 | 1 |
| ANAL ATRESIA                                | 10002120 | 1 |
| ANAL CANDIDIASIS                            | 10002140 | 1 |
| ANAL FISTULA                                | 10002156 | 1 |
| ANAL SKIN TAGS                              | 10002172 | 1 |
| ANAL SPHINCTEROTOMY                         | 10002175 | 1 |
| ANAL STENOSIS                               | 10002176 | 1 |
| ANAL ULCER                                  | 10002180 | 1 |
| ANAPLASTIC THYROID CANCER                   | 10002240 | 1 |
| ANASTOMOTIC ULCER                           | 10002243 | 1 |
| ANDROGENS INCREASED                         | 10002265 | 1 |
| ANEURYSMAL BONE CYST                        | 10002362 | 1 |
| ANGIOGRAM RETINA NORMAL                     | 10002445 | 1 |
| ANHIDROSIS                                  | 10002512 | 1 |
| ANORGASMIA                                  | 10002652 | 1 |
| ANOXIA                                      | 10002660 | 1 |
| ANTIEMETIC SUPPORTIVE CARE                  | 10002781 | 1 |
| ANTIMICROBIAL SUSCEPTIBILITY TEST RESISTANT | 10002793 | 1 |
| ANTISOCIAL BEHAVIOUR                        | 10002820 | 1 |
| AORTIC INJURY                               | 10002899 | 1 |
| APHAKIA                                     | 10002945 | 1 |
| APLASIA                                     | 10002961 | 1 |
| APPLICATION SITE OEDEMA                     | 10003050 | 1 |
| APPLICATION SITE WARMTH                     | 10003060 | 1 |
| ARACHNOIDITIS                               | 10003074 | 1 |
| ARTERIOVENOUS FISTULA OPERATION             | 10003190 | 1 |
| ARTERITIS CORONARY                          | 10003232 | 1 |
| ARTHRITIS VIRAL                             | 10003274 | 1 |
| ASBESTOSIS                                  | 10003441 | 1 |
| ASPARTATE AMINOTRANSFERASE ABNORMAL         | 10003477 | 1 |
| ASPIRATION TRACHEAL NORMAL                  | 10003532 | 1 |

|                                  |          |   |
|----------------------------------|----------|---|
| ASTERIXIS                        | 10003547 | 1 |
| AXILLARY NERVE INJURY            | 10003879 | 1 |
| B-CELL LYMPHOMA STAGE II         | 10003905 | 1 |
| BACTERIAL PERICARDITIS           | 10004050 | 1 |
| BARIUM ENEMA NORMAL              | 10004117 | 1 |
| BARTHOLIN'S CYST REMOVAL         | 10004141 | 1 |
| BARTONELLOSIS                    | 10004145 | 1 |
| BASOSQUAMOUS CARCINOMA           | 10004178 | 1 |
| BELLIGERENCE                     | 10004224 | 1 |
| BENIGN CARDIAC NEOPLASM          | 10004245 | 1 |
| BENIGN NEOPLASM OF BLADDER       | 10004302 | 1 |
| BENIGN NEOPLASM OF SKIN          | 10004398 | 1 |
| BENIGN PROSTATIC HYPERPLASIA     | 10004446 | 1 |
| BETA 2 MICROGLOBULIN NORMAL      | 10004498 | 1 |
| BILIRUBINURIA                    | 10004710 | 1 |
| BIOPSY ABDOMINAL WALL            | 10004721 | 1 |
| BIOPSY ADRENAL GLAND             | 10004724 | 1 |
| BIOPSY ADRENAL GLAND ABNORMAL    | 10004725 | 1 |
| BIOPSY BLADDER NORMAL            | 10004732 | 1 |
| BIOPSY BONE NORMAL               | 10004740 | 1 |
| BIOPSY BRONCHUS ABNORMAL         | 10004748 | 1 |
| BIOPSY HEART NORMAL              | 10004781 | 1 |
| BIOPSY MUCOSA ABNORMAL           | 10004800 | 1 |
| BIOPSY MUCOSA NORMAL             | 10004801 | 1 |
| BIOPSY MUSCLE NORMAL             | 10004804 | 1 |
| BIOPSY OESOPHAGUS                | 10004808 | 1 |
| BIOPSY PERICARDIUM               | 10004842 | 1 |
| BIOPSY PERICARDIUM ABNORMAL      | 10004843 | 1 |
| BIOPSY PERIPHERAL NERVE ABNORMAL | 10004846 | 1 |
| BIOPSY PERIPHERAL NERVE NORMAL   | 10004847 | 1 |
| BIOPSY PERITONEUM                | 10004848 | 1 |
| BIOPSY RECTUM ABNORMAL           | 10004860 | 1 |
| BIOPSY SPINAL CORD               | 10004876 | 1 |
| BIOPSY TESTES                    | 10004882 | 1 |
| BIOPSY TRACHEA                   | 10004894 | 1 |
| BIOPSY TRACHEA ABNORMAL          | 10004895 | 1 |
| BIOPSY VAGINA ABNORMAL           | 10004901 | 1 |
| BIOPSY VULVA                     | 10004903 | 1 |
| BIOPSY VULVA NORMAL              | 10004905 | 1 |
| BIRTH MARK                       | 10004950 | 1 |
| BIRTH TRAUMA                     | 10004954 | 1 |
| BLADDER CANCER RECURRENT         | 10005005 | 1 |
| BLADDER CATHETER REPLACEMENT     | 10005026 | 1 |



|                                     |          |   |
|-------------------------------------|----------|---|
| BLADDER DIVERTICULUM                | 10005038 | 1 |
| BLADDER NEOPLASM                    | 10005056 | 1 |
| BLEEDING TIME SHORTENED             | 10005141 | 1 |
| BLOOD ALDOSTERONE INCREASED         | 10005296 | 1 |
| BLOOD ANTIDIURETIC HORMONE NORMAL   | 10005336 | 1 |
| BLOOD ARSENIC INCREASED             | 10005342 | 1 |
| BLOOD BACTERICIDAL ACTIVITY         | 10005344 | 1 |
| BLOOD CADMIUM                       | 10005378 | 1 |
| BLOOD CAFFEINE INCREASED            | 10005384 | 1 |
| BLOOD CALCITONIN NORMAL             | 10005391 | 1 |
| BLOOD CARBON MONOXIDE INCREASED     | 10005409 | 1 |
| BLOOD CATECHOLAMINES INCREASED      | 10005414 | 1 |
| BLOOD CHLORIDE ABNORMAL             | 10005417 | 1 |
| BLOOD CHOLINESTERASE                | 10005428 | 1 |
| BLOOD CHROMIUM                      | 10005433 | 1 |
| BLOOD CHROMIUM NORMAL               | 10005436 | 1 |
| BLOOD COPPER ABNORMAL               | 10005440 | 1 |
| BLOOD CORTICOTROPHIN DECREASED      | 10005452 | 1 |
| BLOOD ETHANAL INCREASED             | 10005512 | 1 |
| BLOOD ETHANOL DECREASED             | 10005514 | 1 |
| BLOOD GASTRIN DECREASED             | 10005544 | 1 |
| BLOOD GONADOTROPHIN NORMAL          | 10005564 | 1 |
| BLOOD GROUP A                       | 10005565 | 1 |
| BLOOD INSULIN DECREASED             | 10005613 | 1 |
| BLOOD LEAD INCREASED                | 10005642 | 1 |
| BLOOD METHANOL                      | 10005663 | 1 |
| BLOOD PARATHYROID HORMONE ABNORMAL  | 10005700 | 1 |
| BLOOD PRESSURE AMBULATORY INCREASED | 10005732 | 1 |
| BLOOD PRESSURE DIASTOLIC ABNORMAL   | 10005736 | 1 |
| BLOOD THROMBIN                      | 10005817 | 1 |
| BLOOD THROMBIN INCREASED            | 10005821 | 1 |
| BLOOD TRIGLYCERIDES ABNORMAL        | 10005837 | 1 |
| BLOOD URIC ACID DECREASED           | 10005860 | 1 |
| BONE DEVELOPMENT ABNORMAL           | 10005954 | 1 |
| BONE HYPERTROPHY                    | 10005973 | 1 |
| BRAIN STEM GLIOMA                   | 10006143 | 1 |
| BRANCHIAL CYST                      | 10006164 | 1 |
| BREAST CYST DRAINAGE                | 10006221 | 1 |
| BREAST MALFORMATION                 | 10006271 | 1 |
| BREECH DELIVERY                     | 10006346 | 1 |
| BRONCHIAL OBSTRUCTION               | 10006440 | 1 |
| BRONCHOGRAM                         | 10006465 | 1 |
| BRONCHOPULMONARY ASPERGILLOSIS      | 10006473 | 1 |

|                                                 |          |   |
|-------------------------------------------------|----------|---|
| BROWN-SEQUARD SYNDROME                          | 10006491 | 1 |
| BUDD-CHIARI SYNDROME                            | 10006537 | 1 |
| BULBAR PALSY                                    | 10006542 | 1 |
| BULLOUS IMPETIGO                                | 10006563 | 1 |
| BURKITT'S LYMPHOMA                              | 10006595 | 1 |
| BURNS FIRST DEGREE                              | 10006797 | 1 |
| BURSA REMOVAL                                   | 10006807 | 1 |
| CAECOPEXY                                       | 10006920 | 1 |
| CAMPYLOBACTER GASTROENTERITIS                   | 10007048 | 1 |
| CARBON MONOXIDE POISONING                       | 10007238 | 1 |
| CARBOXYHAEMOGLOBIN DECREASED                    | 10007241 | 1 |
| CARCINOGENICITY                                 | 10007269 | 1 |
| CARCINOID TUMOUR PULMONARY                      | 10007282 | 1 |
| CARDIAC ARREST NEONATAL                         | 10007516 | 1 |
| CARDIAC FAILURE HIGH OUTPUT                     | 10007560 | 1 |
| CARDIAC INDEX                                   | 10007575 | 1 |
| CARDIAC INDEX DECREASED                         | 10007577 | 1 |
| CARDIAC MALPOSITION                             | 10007585 | 1 |
| CARDIOVASCULAR FUNCTION TEST ABNORMAL           | 10007651 | 1 |
| CARNITINE NORMAL                                | 10007670 | 1 |
| CD4 LYMPHOCYTES DECREASED                       | 10007839 | 1 |
| CENTRAL NERVOUS SYSTEM FUNCTION TEST ABNORMAL   | 10007947 | 1 |
| CENTRAL VENOUS PRESSURE INCREASED               | 10007980 | 1 |
| CEREBELLAR ARTERY THROMBOSIS                    | 10008023 | 1 |
| CEREBRAL ARTERIOVENOUS MALFORMATION HAEMORRHAGE | 10008086 | 1 |
| CERULOPLASMIN DECREASED                         | 10008217 | 1 |
| CERVICAL NEURITIS                               | 10008293 | 1 |
| CERVICITIS TRICHOMONAL                          | 10008332 | 1 |
| CHEYNE-STOKES RESPIRATION                       | 10008501 | 1 |
| CHLOROPSIA                                      | 10008585 | 1 |
| CHOLANGIOGRAM NORMAL                            | 10008600 | 1 |
| CHOLERA                                         | 10008631 | 1 |
| CHONDROMALACIA                                  | 10008729 | 1 |
| CHOROID MELANOMA                                | 10008773 | 1 |
| CHRONIC HEPATITIS B                             | 10008910 | 1 |
| CHRONIC LYMPHOCYTIC LEUKAEMIA STAGE 0           | 10008963 | 1 |
| CHRONIC PAROXYSMAL HEMICRANIA                   | 10009094 | 1 |
| CIRCUMSTANTIALITY                               | 10009207 | 1 |
| CLEFT LIP AND PALATE                            | 10009260 | 1 |
| CLOTTING FACTOR TRANSFUSION                     | 10009678 | 1 |
| CNS VENTRICULITIS                               | 10009719 | 1 |
| COAGULATION FACTOR V LEVEL DECREASED            | 10009754 | 1 |
| COAGULATION FACTOR X LEVEL                      | 10009773 | 1 |

|                                       |          |   |
|---------------------------------------|----------|---|
| COAGULATION FACTOR XI LEVEL           | 10009777 | 1 |
| COAGULATION FACTOR XII LEVEL          | 10009781 | 1 |
| COAGULATION TIME NORMAL               | 10009794 | 1 |
| COGWHEEL RIGIDITY                     | 10009848 | 1 |
| COLD AGGLUTININS NEGATIVE             | 10009853 | 1 |
| COLLAGEN-VASCULAR DISEASE             | 10009905 | 1 |
| COLON CANCER STAGE IV                 | 10009956 | 1 |
| COLON GANGRENE                        | 10009971 | 1 |
| COLONIC FISTULA                       | 10009995 | 1 |
| COLOSTOMY INFECTION                   | 10010046 | 1 |
| COLOUR BLINDNESS ACQUIRED             | 10010051 | 1 |
| COLOUR VISION TESTS ABNORMAL          | 10010056 | 1 |
| COMPLEMENT FIXATION TEST POSITIVE     | 10010134 | 1 |
| COMPLICATED FRACTURE                  | 10010149 | 1 |
| COMPLICATIONS OF TRANSPLANT SURGERY   | 10010183 | 1 |
| COMPLICATIONS OF TRANSPLANTED KIDNEY  | 10010185 | 1 |
| COMPLICATIONS OF TRANSPLANTED LUNG    | 10010187 | 1 |
| COMPULSIONS                           | 10010219 | 1 |
| CONDOM                                | 10010274 | 1 |
| CONGENITAL CYSTIC KIDNEY DISEASE      | 10010428 | 1 |
| CONGENITAL DIAPHRAGMATIC HERNIA       | 10010439 | 1 |
| CONGENITAL HYDROCEPHALUS              | 10010506 | 1 |
| CONGENITAL MEGAURETER                 | 10010540 | 1 |
| CONGENITAL SPINAL FUSION              | 10010629 | 1 |
| CONJOINED TWINS                       | 10010688 | 1 |
| CONJUNCTIVAL CYST                     | 10010703 | 1 |
| CONJUNCTIVAL DISCOLOURATION           | 10010712 | 1 |
| CONJUNCTIVAL SCAR                     | 10010733 | 1 |
| CONTRACEPTIVE DIAPHRAGM               | 10010811 | 1 |
| CONTRAINDICATION TO MEDICAL TREATMENT | 10010833 | 1 |
| COPPER DEFICIENCY                     | 10010957 | 1 |
| COPROLALIA                            | 10010964 | 1 |
| CORNEAL DEGENERATION                  | 10010996 | 1 |
| CORONARY ARTERY ANEURYSM              | 10011071 | 1 |
| CORONARY ARTERY SURGERY               | 10011090 | 1 |
| CORTISOL FREE URINE NORMAL            | 10011205 | 1 |
| COW POX                               | 10011238 | 1 |
| CREATINE URINE                        | 10011353 | 1 |
| CROSS SENSITIVITY REACTION            | 10011411 | 1 |
| CSF ELECTROPHORESIS                   | 10011530 | 1 |
| CSF LACTATE DEHYDROGENASE NORMAL      | 10011545 | 1 |
| CULTURE THROAT POSITIVE               | 10011634 | 1 |
| CUSHING'S SYNDROME                    | 10011652 | 1 |

|                                         |          |   |
|-----------------------------------------|----------|---|
| CUSHINGOID                              | 10011655 | 1 |
| CUTANEOUS SARCOIDOSIS                   | 10011674 | 1 |
| CYCLOTHYMIC DISORDER                    | 10011724 | 1 |
| CYSTOGRAM ABNORMAL                      | 10011805 | 1 |
| CYSTOGRAM NORMAL                        | 10011806 | 1 |
| DACRYOCANALICULITIS                     | 10011843 | 1 |
| DACRYOCYSTITIS                          | 10011844 | 1 |
| DEAFNESS TRAUMATIC                      | 10011903 | 1 |
| DEATH OF PET                            | 10011930 | 1 |
| DELAYED DELIVERY                        | 10012186 | 1 |
| DELIRIUM TREMENS                        | 10012225 | 1 |
| DELUSION OF REPLACEMENT                 | 10012245 | 1 |
| DENGUE FEVER                            | 10012310 | 1 |
| DEPILATION                              | 10012364 | 1 |
| DEPOSIT EYE                             | 10012369 | 1 |
| DEVICE EXTRUSION                        | 10012579 | 1 |
| DIABETIC RETINAL OEDEMA                 | 10012688 | 1 |
| DIFFUSE LARGE B-CELL LYMPHOMA RECURRENT | 10012821 | 1 |
| DIFFUSE LARGE B-CELL LYMPHOMA STAGE IV  | 10012826 | 1 |
| DIFFUSE VASCULITIS                      | 10012978 | 1 |
| DIGEORGE'S SYNDROME                     | 10012979 | 1 |
| DILATATION VENTRICULAR                  | 10013012 | 1 |
| DIPHTHERIA                              | 10013023 | 1 |
| DIPLACUSIS                              | 10013032 | 1 |
| DISSEMINATED TUBERCULOSIS               | 10013453 | 1 |
| DISSOCIATIVE IDENTITY DISORDER          | 10013468 | 1 |
| DIVERTICULITIS INTESTINAL HAEMORRHAGIC  | 10013541 | 1 |
| DIVERTICULUM GASTRIC                    | 10013558 | 1 |
| DIVERTICULUM INTESTINAL HAEMORRHAGIC    | 10013560 | 1 |
| DRUG WITHDRAWAL CONVULSIONS             | 10013752 | 1 |
| DUODENAL OBSTRUCTION                    | 10013830 | 1 |
| DUODENAL PERFORATION                    | 10013832 | 1 |
| DUODENAL ULCER PERFORATION              | 10013849 | 1 |
| DYSDIADOCHOKINESIS                      | 10013896 | 1 |
| EAR DEFORMITY ACQUIRED                  | 10014002 | 1 |
| EBOLA DISEASE                           | 10014071 | 1 |
| ECTHYMA                                 | 10014141 | 1 |
| ECTROPION                               | 10014179 | 1 |
| ELECTROCARDIOGRAM DELTA WAVES ABNORMAL  | 10014372 | 1 |
| ELECTROCARDIOGRAM QT INTERVAL NORMAL    | 10014386 | 1 |
| ELECTROCOCHLEOGRAM ABNORMAL             | 10014399 | 1 |
| ELEPHANTIASIS                           | 10014472 | 1 |
| EMPTY SELLA SYNDROME                    | 10014567 | 1 |

|                                                  |          |   |
|--------------------------------------------------|----------|---|
| EMPHYEMA DRAINAGE                                | 10014569 | 1 |
| ENCEPHALITIS MENINGOCOCCAL                       | 10014597 | 1 |
| ENDOCARDITIS ENTEROCOCCAL                        | 10014671 | 1 |
| ENDOMETRIAL CANCER STAGE II                      | 10014739 | 1 |
| ENDOMETRIAL CANCER STAGE III                     | 10014740 | 1 |
| ENDOMETRIAL NEOPLASM                             | 10014759 | 1 |
| ENDOPHTHALMITIS                                  | 10014801 | 1 |
| ENDOSCOPIC RETROGRADE CHOLANGIOPANCREATOGRAPHY N | 10014804 | 1 |
| ENDOSCOPY SMALL INTESTINE ABNORMAL               | 10014817 | 1 |
| ENTEROBIASIS                                     | 10014881 | 1 |
| ENTEROCOLITIS HAEMORRHAGIC                       | 10014896 | 1 |
| EOSINOPHILIA MYALGIA SYNDROME                    | 10014952 | 1 |
| EPENDYMOMA                                       | 10014967 | 1 |
| EPIPHYSIOLYSIS                                   | 10015079 | 1 |
| EPITHELIOID SARCOMA                              | 10015099 | 1 |
| ERYTHEMA INFECTIOSUM                             | 10015214 | 1 |
| ERYTHEMA MARGINATUM                              | 10015216 | 1 |
| EUSTACHIAN TUBE PATULOUS                         | 10015546 | 1 |
| EUTHYROID SICK SYNDROME                          | 10015549 | 1 |
| EXCESSIVE EXERCISE                               | 10015599 | 1 |
| EXERCISE TEST NORMAL                             | 10015654 | 1 |
| EXHIBITIONISM                                    | 10015670 | 1 |
| EXOMPHALOS                                       | 10015677 | 1 |
| EXOSTOSIS OF JAW                                 | 10015690 | 1 |
| EXSANGUINATION                                   | 10015719 | 1 |
| EYE INFECTION FUNGAL                             | 10015933 | 1 |
| EYE MUSCLE RECESSION                             | 10015954 | 1 |
| EYELID BOIL                                      | 10015980 | 1 |
| EYELID PTOSIS CONGENITAL                         | 10015996 | 1 |
| FACE CRUSHING                                    | 10016023 | 1 |
| FALLOPIAN TUBE CANCER STAGE III                  | 10016186 | 1 |
| FAMILIAL TREMOR                                  | 10016212 | 1 |
| FASCIA RELEASE                                   | 10016223 | 1 |
| FASCIECTOMY                                      | 10016227 | 1 |
| FAT EMBOLISM                                     | 10016246 | 1 |
| FEAR OF OPEN SPACES                              | 10016279 | 1 |
| FEMORAL NERVE INJURY                             | 10016451 | 1 |
| FEVER NEONATAL                                   | 10016562 | 1 |
| FIBRINOLYSIS INCREASED                           | 10016607 | 1 |
| FIBRINOLYSIS NORMAL                              | 10016610 | 1 |
| FINGER REPAIR OPERATION                          | 10016687 | 1 |
| FLAT CHEST                                       | 10016761 | 1 |
| FLEA INFESTATION                                 | 10016773 | 1 |

|                                                  |          |   |
|--------------------------------------------------|----------|---|
| FOETAL-MATERNAL HAEMORRHAGE                      | 10016871 | 1 |
| FOOD INTERACTION                                 | 10016948 | 1 |
| FOOT AMPUTATION                                  | 10016960 | 1 |
| FOOT AND MOUTH DISEASE                           | 10016961 | 1 |
| FOREIGN BODY ASPIRATION                          | 10017000 | 1 |
| FOREIGN BODY IN EAR                              | 10017010 | 1 |
| FRACTURE NONUNION                                | 10017088 | 1 |
| FRAGILE X SYNDROME                               | 10017324 | 1 |
| FRUCTOSAMINE                                     | 10017393 | 1 |
| FUMBLING                                         | 10017472 | 1 |
| FUNCTIONAL RESIDUAL CAPACITY ABNORMAL            | 10017505 | 1 |
| FUNCTIONAL RESIDUAL CAPACITY DECREASED           | 10017507 | 1 |
| FUNDOSCOPY ABNORMAL                              | 10017520 | 1 |
| GALLBLADDER CANCER                               | 10017614 | 1 |
| GAMMA RADIATION THERAPY TO BRAIN                 | 10017676 | 1 |
| GAMMA-GLUTAMYLTRANSFERASE DECREASED              | 10017690 | 1 |
| GAS GANGRENE                                     | 10017737 | 1 |
| GASTRIC LAVAGE                                   | 10017792 | 1 |
| GASTRIC MUCOSAL HYPERTROPHY                      | 10017807 | 1 |
| GASTRIC ULCER HAEMORRHAGE                        | 10017826 | 1 |
| GASTROENTERITIS PROTEUS                          | 10017910 | 1 |
| GASTROENTERITIS SALMONELLA                       | 10017914 | 1 |
| GASTROINTESTINAL CARCINOMA                       | 10017940 | 1 |
| GENERAL ANAESTHESIA                              | 10018060 | 1 |
| GINGIVAL EROSION                                 | 10018282 | 1 |
| GINGIVITIS ULCERATIVE                            | 10018296 | 1 |
| GLIOMA                                           | 10018338 | 1 |
| GLOMERULONEPHRITIS ACUTE                         | 10018366 | 1 |
| GLOMERULONEPHRITIS PROLIFERATIVE                 | 10018376 | 1 |
| GLUCOSE TOLERANCE IMPAIRED IN PREGNANCY          | 10018430 | 1 |
| GONADOTROPHIN RELEASING HORMONE STIMULATION TEST | 10018519 | 1 |
| GOODPASTURE'S SYNDROME                           | 10018620 | 1 |
| GOUTY TOPHUS                                     | 10018641 | 1 |
| GROWTH ACCELERATED                               | 10018746 | 1 |
| HAEMANGIOBLASTOMA                                | 10018813 | 1 |
| HAEMANGIOMA OF BREAST                            | 10018820 | 1 |
| HAEMOCONCENTRATION                               | 10018873 | 1 |
| HAEMOGLOBIN A PRESENT                            | 10018878 | 1 |
| HALLUCINATION, GUSTATORY                         | 10019071 | 1 |
| HAND REPAIR OPERATION                            | 10019118 | 1 |
| HEART TRANSPLANT REJECTION                       | 10019315 | 1 |
| HEAT OEDEMA                                      | 10019340 | 1 |
| HEINZ BODIES                                     | 10019372 | 1 |

|                                               |          |   |
|-----------------------------------------------|----------|---|
| HEPATIC ADENOMA                               | 10019629 | 1 |
| HEPATIC ARTERY THROMBOSIS                     | 10019636 | 1 |
| HEPATIC ATROPHY                               | 10019637 | 1 |
| HEPATIC HAEMATOMA                             | 10019676 | 1 |
| HEPATIC RUPTURE                               | 10019707 | 1 |
| HEPATITIS B ANTIBODY NORMAL                   | 10019735 | 1 |
| HEPATITIS B SURFACE ANTIGEN POSITIVE          | 10019742 | 1 |
| HEPATITIS C RNA NEGATIVE                      | 10019749 | 1 |
| HEPATITIS C RNA POSITIVE                      | 10019750 | 1 |
| HEPATITIS D                                   | 10019762 | 1 |
| HEPATITIS FULMINANT                           | 10019772 | 1 |
| HEPATITIS INFECTIOUS MONONUCLEOSIS            | 10019781 | 1 |
| HEPATITIS TOXIC                               | 10019795 | 1 |
| HEPATORENAL SYNDROME                          | 10019846 | 1 |
| HEREDITARY OPTIC ATROPHY                      | 10019895 | 1 |
| HEREDITARY SPHEROCYTOSIS                      | 10019904 | 1 |
| HIP DISARTICULATION                           | 10020098 | 1 |
| HISTOPLASMOSIS DISSEMINATED                   | 10020144 | 1 |
| HODGKIN'S DISEASE NODULAR SCLEROSIS STAGE III | 10020252 | 1 |
| HODGKIN'S DISEASE STAGE II                    | 10020269 | 1 |
| HUMAN HERPESVIRUS 6 INFECTION                 | 10020431 | 1 |
| HYALOSIS ASTEROID                             | 10020478 | 1 |
| HYPERBILIRUBINAEMIA NEONATAL                  | 10020580 | 1 |
| HYPERKINESIA                                  | 10020651 | 1 |
| HYPERPARATHYROIDISM PRIMARY                   | 10020707 | 1 |
| HYERSPLENISM                                  | 10020769 | 1 |
| HYPERTROPHIC SCAR                             | 10020879 | 1 |
| HYPERVITAMINOSIS                              | 10020915 | 1 |
| HYPNAGOGIC HALLUCINATION                      | 10020927 | 1 |
| HYPOLIPIDAEMIA                                | 10021024 | 1 |
| HYPOMETABOLISM                                | 10021034 | 1 |
| HYOPARATHYROIDISM                             | 10021041 | 1 |
| HYPOPITUITARISM                               | 10021067 | 1 |
| HYOPLASTIC LEFT HEART SYNDROME                | 10021076 | 1 |
| HYOPROTEINAEMIA                               | 10021083 | 1 |
| IIIRD NERVE INJURY                            | 10021281 | 1 |
| ILIAC ARTERY EMBOLISM                         | 10021338 | 1 |
| ILLOGICAL THINKING                            | 10021402 | 1 |
| IMPLANTATION COMPLICATION                     | 10021547 | 1 |
| IMPRISONMENT                                  | 10021554 | 1 |
| INCISIONAL HERNIA, OBSTRUCTIVE                | 10021626 | 1 |
| INFANTILE SPASMS                              | 10021750 | 1 |
| INFECTED BUNION                               | 10021770 | 1 |

|                                        |          |   |
|----------------------------------------|----------|---|
| INFECTION IN AN IMMUNOCOMPROMISED HOST | 10021818 | 1 |
| INFECTION PROTOZOAL                    | 10021859 | 1 |
| INFECTIVE MYOSITIS                     | 10021918 | 1 |
| INJECTION SITE PHLEBITIS               | 10022090 | 1 |
| INSPIRATORY CAPACITY ABNORMAL          | 10022446 | 1 |
| INSULIN C-PEPTIDE NORMAL               | 10022480 | 1 |
| INTERCAPILLARY GLOMERULOSCLEROSIS      | 10022530 | 1 |
| INTERLEUKIN THERAPY                    | 10022539 | 1 |
| INTERMITTENT EXPLOSIVE DISORDER        | 10022568 | 1 |
| INTERVENTRICULAR SEPTUM RUPTURE        | 10022626 | 1 |
| INTESTINAL PSEUDO-OBSTRUCTION          | 10022698 | 1 |
| INTESTINAL STENOSIS                    | 10022699 | 1 |
| INTESTINAL ULCER                       | 10022714 | 1 |
| INTRINSIC FACTOR ANTIBODY              | 10022851 | 1 |
| INTRINSIC FACTOR ANTIBODY NEGATIVE     | 10022853 | 1 |
| IODINE UPTAKE ABNORMAL                 | 10022918 | 1 |
| IODINE UPTAKE NORMAL                   | 10022924 | 1 |
| IRON METABOLISM DISORDER               | 10022983 | 1 |
| IVTH NERVE INJURY                      | 10023108 | 1 |
| JAUNDICE NEONATAL                      | 10023138 | 1 |
| JEJUNOSTOMY                            | 10023180 | 1 |
| JOINT MANIPULATION                     | 10023220 | 1 |
| KARYOTYPE ANALYSIS NORMAL              | 10023304 | 1 |
| KERATOACANTHOMA                        | 10023347 | 1 |
| KIDNEY CONTUSION                       | 10023413 | 1 |
| KIDNEY DUPLEX                          | 10023416 | 1 |
| KIDNEY FIBROSIS                        | 10023421 | 1 |
| KIDNEY TRANSPLANT REJECTION            | 10023439 | 1 |
| LABORATORY TEST INTERFERENCE           | 10023550 | 1 |
| LACRIMAL GLAND OPERATION               | 10023633 | 1 |
| LAPAROSCOPY NORMAL                     | 10023695 | 1 |
| LARGE INTESTINAL OBSTRUCTION REDUCTION | 10023794 | 1 |
| LARYNGEAL PAPILOMA                     | 10023849 | 1 |
| LEAD URINE INCREASED                   | 10024088 | 1 |
| LEIOMYOMA                              | 10024184 | 1 |
| LENS DISLOCATION                       | 10024203 | 1 |
| LENTICULAR OPACITIES                   | 10024214 | 1 |
| LEPTOSPIROSIS                          | 10024238 | 1 |
| LEUKODERMA                             | 10024380 | 1 |
| LEUKOENCEPHALOPATHY                    | 10024382 | 1 |
| LICE INFESTATION                       | 10024424 | 1 |
| LIGAMENT LAXITY                        | 10024452 | 1 |
| LIP LESION EXCISION                    | 10024555 | 1 |



|                                                  |          |   |
|--------------------------------------------------|----------|---|
| LIP NEOPLASM MALIGNANT STAGE UNSPECIFIED         | 10024557 | 1 |
| LISTERIOSIS                                      | 10024641 | 1 |
| LIVER TENDERNESS                                 | 10024712 | 1 |
| LIVIDITY                                         | 10024728 | 1 |
| LUNG ADENOCARCINOMA STAGE III                    | 10025037 | 1 |
| LUNG CARCINOMA CELL TYPE UNSPECIFIED RECURRENT   | 10025065 | 1 |
| LUNG CARCINOMA CELL TYPE UNSPECIFIED STAGE 0     | 10025066 | 1 |
| LUNG CARCINOMA CELL TYPE UNSPECIFIED STAGE I     | 10025067 | 1 |
| LUNG TRANSPLANT                                  | 10025127 | 1 |
| LYMPHANGIOGRAM                                   | 10025215 | 1 |
| LYMPHANGIOMA                                     | 10025219 | 1 |
| MALIGNANT MELANOMA IN SITU                       | 10025652 | 1 |
| MALIGNANT NEOPLASM OF EYE                        | 10025910 | 1 |
| MASTITIS POSTPARTUM                              | 10026889 | 1 |
| MEAN ARTERIAL PRESSURE INCREASED                 | 10026985 | 1 |
| MEASLES ANTIBODY NEGATIVE                        | 10027012 | 1 |
| MEDIAN NERVE INJURY                              | 10027067 | 1 |
| MEGACOLON                                        | 10027110 | 1 |
| MEGALOBLASTS INCREASED                           | 10027131 | 1 |
| MEIBOMIANITIS                                    | 10027137 | 1 |
| MELANODERMA                                      | 10027146 | 1 |
| MENINGIOMA BENIGN                                | 10027192 | 1 |
| MENINGITIS HERPES                                | 10027242 | 1 |
| MENINGITIS PNEUMOCOCCAL                          | 10027253 | 1 |
| MENINGOCOCCAL SEPSIS                             | 10027280 | 1 |
| MENINGOENCEPHALITIS HERPETIC                     | 10027285 | 1 |
| MESENTERIC VENOUS OCCLUSION                      | 10027403 | 1 |
| MESOTHELIOMA                                     | 10027406 | 1 |
| METABOLIC ABNORMALITY MANAGEMENT                 | 10027415 | 1 |
| METANEPHRINE URINE INCREASED                     | 10027445 | 1 |
| METASTASES TO ADRENALS                           | 10027451 | 1 |
| METASTASES TO THE MEDIASTINUM                    | 10027469 | 1 |
| METHAEMOGLOBIN URINE ABSENT                      | 10027499 | 1 |
| MICROCEPHALY                                     | 10027534 | 1 |
| MICROCYTOSIS                                     | 10027540 | 1 |
| MICROTIA                                         | 10027555 | 1 |
| MIXED DEAFNESS                                   | 10027757 | 1 |
| MONONUCLEOSIS SYNDROME                           | 10027924 | 1 |
| MOOD DISORDER DUE TO A GENERAL MEDICAL CONDITION | 10027944 | 1 |
| MOROSE                                           | 10027977 | 1 |
| MOYAMOYA DISEASE                                 | 10028047 | 1 |
| MULTI-VITAMIN DEFICIENCY                         | 10028155 | 1 |
| MULTIPAROUS                                      | 10028163 | 1 |

|                                      |          |   |
|--------------------------------------|----------|---|
| MULTIPLE CONGENITAL ABNORMALITIES    | 10028182 | 1 |
| MURINE TYPHUS                        | 10028282 | 1 |
| MUSCLE REATTACHMENT                  | 10028325 | 1 |
| MYOGLOBIN URINE PRESENT              | 10028631 | 1 |
| MYOMECTOMY                           | 10028634 | 1 |
| NAIL AVULSION                        | 10028686 | 1 |
| NAIL DYSTROPHY                       | 10028698 | 1 |
| NASAL SEPTAL OPERATION               | 10028760 | 1 |
| NECK CRUSHING                        | 10028829 | 1 |
| NEGLECT OF PERSONAL APPEARANCE       | 10028901 | 1 |
| NEONATAL ASPHYXIA                    | 10028923 | 1 |
| NERVE ROOT INJURY LUMBAR             | 10029184 | 1 |
| NEURILEMMOMA BENIGN                  | 10029235 | 1 |
| NEUROFIBROMATOSIS                    | 10029268 | 1 |
| NEUROMUSCULAR BLOCKADE               | 10029315 | 1 |
| NEUROPATHIC ARTHROPATHY              | 10029326 | 1 |
| NEUROTOXICITY                        | 10029350 | 1 |
| NIPPLE INFECTION                     | 10029419 | 1 |
| NON-SMALL CELL LUNG CANCER STAGE III | 10029519 | 1 |
| NON-CARDIOGENIC PULMONARY OEDEMA     | 10029538 | 1 |
| NON-HODGKIN'S LYMPHOMA RECURRENT     | 10029600 | 1 |
| NON-HODGKIN'S LYMPHOMA STAGE III     | 10029604 | 1 |
| NORMAL PRESSURE HYDROCEPHALUS        | 10029773 | 1 |
| NULLIPAROUS                          | 10029827 | 1 |
| OCCUPATIONAL PROBLEM ENVIRONMENTAL   | 10030028 | 1 |
| OCULOGYRIC CRISIS                    | 10030071 | 1 |
| OCULOMOTOR STUDY ABNORMAL            | 10030078 | 1 |
| OEDEMA GENITAL                       | 10030104 | 1 |
| OESOPHAGEAL ADENOCARCINOMA           | 10030137 | 1 |
| OESOPHAGEAL CANDIDIASIS              | 10030154 | 1 |
| OESOPHAGEAL PERFORATION              | 10030181 | 1 |
| OESOPHAGEAL ULCER HAEMORRHAGE        | 10030202 | 1 |
| OESOPHAGEAL VARICEAL LIGATION        | 10030208 | 1 |
| OESOPHAGOSCOPY ABNORMAL              | 10030223 | 1 |
| OESTROGEN THERAPY                    | 10030252 | 1 |
| OLIGODENDROGLIOMA                    | 10030286 | 1 |
| OPTIC DISC HAEMORRHAGE               | 10030919 | 1 |
| OPTICOKINETIC NYSTAGMUS TESTS        | 10030955 | 1 |
| ORAL PAPULE                          | 10031010 | 1 |
| ORGANIC BRAIN SYNDROME               | 10031077 | 1 |
| OSTEOLYSIS                           | 10031248 | 1 |
| OSTEOTOMY                            | 10031300 | 1 |
| OTITIS MEDIA CHRONIC                 | 10033081 | 1 |

|                                        |          |   |
|----------------------------------------|----------|---|
| OTOSCLEROSIS                           | 10033103 | 1 |
| OVARIAN GERM CELL TERATOMA BENIGN      | 10033236 | 1 |
| OVARIAN NECROSIS                       | 10033270 | 1 |
| OVARIAN RUPTURE                        | 10033279 | 1 |
| OVERWORK                               | 10033308 | 1 |
| OVULATION INDUCTION                    | 10033312 | 1 |
| PANCREATICODUODENECTOMY                | 10033644 | 1 |
| PAPILLITIS                             | 10033708 | 1 |
| PAPILLOMA EXCISION                     | 10033714 | 1 |
| PARADOXICAL PRESSOR RESPONSE           | 10033771 | 1 |
| PARALYTIC LAGOPHTHALMOS                | 10033842 | 1 |
| PARANOID PERSONALITY DISORDER          | 10033869 | 1 |
| PARASITE STOOL TEST POSITIVE           | 10033905 | 1 |
| PARASITE URINE TEST NEGATIVE           | 10033908 | 1 |
| PARATHYROID DISORDER                   | 10033942 | 1 |
| PARENT-CHILD PROBLEM                   | 10033981 | 1 |
| PARITY                                 | 10033997 | 1 |
| PAROTID ABSCESS                        | 10034019 | 1 |
| PAST-POINTING                          | 10034104 | 1 |
| PATENT DUCTUS ARTERIOSUS               | 10034130 | 1 |
| PELVIC PROLAPSE                        | 10034268 | 1 |
| PERICARDITIS ADHESIVE                  | 10034486 | 1 |
| PERINEAL HAEMATOMA                     | 10034520 | 1 |
| PERINEPHRIC ABSCESS                    | 10034531 | 1 |
| PERIPHERAL CIRCULATORY FAILURE         | 10034567 | 1 |
| PERITONEAL ADHESIONS                   | 10034650 | 1 |
| PERSEVERATION                          | 10034703 | 1 |
| PETROLEUM DISTILLATE POISONING         | 10034761 | 1 |
| PHILADELPHIA CHROMOSOME POSITIVE       | 10034877 | 1 |
| PHIMOSIS                               | 10034878 | 1 |
| PIGMENTATION LIP                       | 10035025 | 1 |
| PILONIDAL CYST                         | 10035043 | 1 |
| PILONIDAL SINUS REPAIR                 | 10035047 | 1 |
| PINGUECULA                             | 10035060 | 1 |
| PITUITARY-DEPENDENT CUSHING'S SYNDROME | 10035109 | 1 |
| PLACENTAL TRANSFUSION SYNDROME         | 10035146 | 1 |
| PLASMA CELL LEUKAEMIA                  | 10035222 | 1 |
| PLASMACYTOMA                           | 10035484 | 1 |
| PLASMACYTOSIS                          | 10035485 | 1 |
| PLASMODIUM VIVAX INFECTION             | 10035503 | 1 |
| PLATELET DESTRUCTION INCREASED         | 10035531 | 1 |
| PLEURAL CALCIFICATION                  | 10035592 | 1 |
| PLEURAL RUB                            | 10035615 | 1 |

|                                            |          |   |
|--------------------------------------------|----------|---|
| PNEUMONECTOMY                              | 10035663 | 1 |
| PNEUMONIA ADENOVIRAL                       | 10035665 | 1 |
| PNEUMONIA CYTOMEGALOVIRAL                  | 10035676 | 1 |
| PNEUMONIA ESCHERICHIA                      | 10035699 | 1 |
| PNEUMONIA INFLUENZAL                       | 10035714 | 1 |
| PNEUMOTHORAX TRAUMATIC                     | 10035765 | 1 |
| POLYDACTYLY                                | 10036063 | 1 |
| POLYGLANDULAR AUTOIMMUNE SYNDROME TYPE I   | 10036072 | 1 |
| PORPHYRIA                                  | 10036181 | 1 |
| PORTAL VEIN PHLEBITIS                      | 10036205 | 1 |
| POST INFLAMMATORY PIGMENTATION CHANGE      | 10036229 | 1 |
| POST ABORTION HAEMORRHAGE                  | 10036246 | 1 |
| POSTPARTUM VENOUS THROMBOSIS               | 10036300 | 1 |
| POTASSIUM HYDROXIDE PREPARATION NEGATIVE   | 10036448 | 1 |
| POTASSIUM HYDROXIDE PREPARATION POSITIVE   | 10036449 | 1 |
| POUCHITIS                                  | 10036463 | 1 |
| PREMEDICATION                              | 10036500 | 1 |
| PRESENILE DEMENTIA                         | 10036631 | 1 |
| PRIAPISM                                   | 10036661 | 1 |
| PRIMARY HYPOTHYROIDISM                     | 10036697 | 1 |
| PRIMARY MEDIASTINAL LARGE B-CELL LYMPHOMA  | 10036710 | 1 |
| PRIMIPAROUS                                | 10036758 | 1 |
| PROGESTIN THERAPY                          | 10036797 | 1 |
| PROGRESSIVE BULBAR PALSY                   | 10036800 | 1 |
| PROGRESSIVE MULTIFOCAL LEUKOENCEPHALOPATHY | 10036807 | 1 |
| PROSTATIC SPECIFIC ANTIGEN DECREASED       | 10036972 | 1 |
| PROTEIN ALBUMIN RATIO                      | 10036989 | 1 |
| PROTEIN ALBUMIN RATIO ABNORMAL             | 10036990 | 1 |
| PSEUDOHYPOPARATHYROIDISM                   | 10037126 | 1 |
| PTERYGIUM                                  | 10037263 | 1 |
| PULMONARY ARTERY ANEURYSM                  | 10037336 | 1 |
| PULMONARY ARTERY STENOSIS                  | 10037338 | 1 |
| PULMONARY CONTUSION                        | 10037370 | 1 |
| PULMONARY VALVE REPLACEMENT                | 10037449 | 1 |
| PULMONARY VALVE STENOSIS                   | 10037450 | 1 |
| PULSE PRESSURE ABNORMAL                    | 10037478 | 1 |
| PULSE PRESSURE DECREASED                   | 10037480 | 1 |
| PUNCTATE KERATITIS                         | 10037508 | 1 |
| PUPILLARY LIGHT REFLEX TESTS               | 10037524 | 1 |
| PURPURA SENILE                             | 10037560 | 1 |
| PYELOPLASTY                                | 10037607 | 1 |
| PYOGENIC GRANULOMA                         | 10037649 | 1 |
| RADIATION PNEUMONITIS                      | 10037765 | 1 |

|                                           |          |   |
|-------------------------------------------|----------|---|
| RADICAL HYSTERECTOMY                      | 10037771 | 1 |
| RADICULOTOMY                              | 10037781 | 1 |
| RANULA                                    | 10037838 | 1 |
| REACTION TO COLOURING                     | 10037974 | 1 |
| RECTAL POLYPECTOMY                        | 10038075 | 1 |
| RECTAL PROLAPSE                           | 10038077 | 1 |
| RECTAL ULCER                              | 10038080 | 1 |
| RECTOCELE                                 | 10038084 | 1 |
| RED BLOOD CELL MACROCYTES PRESENT         | 10038162 | 1 |
| RED BLOOD CELL ROULEAUX FORMATION PRESENT | 10038168 | 1 |
| REFEEDING SYNDROME                        | 10038236 | 1 |
| REFRACTION DISORDER                       | 10038264 | 1 |
| RENAL ANEURYSM                            | 10038366 | 1 |
| RENAL CELL CARCINOMA RECURRENT            | 10038410 | 1 |
| RENAL CORTICAL NECROSIS                   | 10038422 | 1 |
| RENAL DYSPLASIA                           | 10038433 | 1 |
| RENAL HAEMATOMA                           | 10038459 | 1 |
| RENAL TUBULAR ATROPHY                     | 10038536 | 1 |
| RENIN ABNORMAL                            | 10038556 | 1 |
| RETINAL CYST                              | 10038839 | 1 |
| RETINAL DEPOSITS                          | 10038847 | 1 |
| RETINITIS PIGMENTOSA                      | 10038914 | 1 |
| RETINOPATHY PROLIFERATIVE                 | 10038934 | 1 |
| RETIREMENT                                | 10038942 | 1 |
| RETROGRADE AMNESIA                        | 10038965 | 1 |
| RETROPERITONEAL ABSCESS                   | 10038975 | 1 |
| REVERSAL OF OPIATE ACTIVITY               | 10039004 | 1 |
| RHABDOMYOMA                               | 10039021 | 1 |
| RHABDOMYOSARCOMA                          | 10039022 | 1 |
| RHINITIS PERENNIAL                        | 10039094 | 1 |
| RIB EXCISION                              | 10039116 | 1 |
| RINNE TUNING FORK TEST                    | 10039190 | 1 |
| ROULEAUX FORMATION                        | 10039238 | 1 |
| RUBELLA ANTIBODY NEGATIVE                 | 10039257 | 1 |
| RUBELLA ANTIBODY POSITIVE                 | 10039258 | 1 |
| SALIVARY DUCT STENOSIS                    | 10039388 | 1 |
| SALIVARY GLAND CANCER STAGE III           | 10039402 | 1 |
| SALPINGO-OOPHORECTOMY                     | 10039464 | 1 |
| SALPINGO-OOPHORECTOMY UNILATERAL          | 10039467 | 1 |
| SARCOMA                                   | 10039491 | 1 |
| SARCOMA EXCISION                          | 10039493 | 1 |
| SCAR EXCISION                             | 10039583 | 1 |
| SCHISTOSOMIASIS                           | 10039603 | 1 |

|                                                  |          |   |
|--------------------------------------------------|----------|---|
| SCHOOL REFUSAL                                   | 10039660 | 1 |
| SCHWANNOMA                                       | 10039667 | 1 |
| SCLEROTHERAPY                                    | 10039721 | 1 |
| SCROTAL SWELLING                                 | 10039759 | 1 |
| SEBACEOUS CYST EXCISION                          | 10039779 | 1 |
| SELECTIVE MUTISM                                 | 10039917 | 1 |
| SHOULDER DYSTOCIA                                | 10040613 | 1 |
| SICKLE CELL ANAEMIA                              | 10040641 | 1 |
| SICKLE CELL TRAIT                                | 10040650 | 1 |
| SINGLE PHOTON EMISSION COMPUTERISED TOMOGRAM NOR | 10040724 | 1 |
| SKIN DYSTROPHY                                   | 10040836 | 1 |
| SKIN ULCER EXCISION                              | 10040944 | 1 |
| SLE ARTHRITIS                                    | 10040968 | 1 |
| SLIT-LAMP TESTS NORMAL                           | 10041034 | 1 |
| SMALL CELL LUNG CANCER EXTENSIVE STAGE           | 10041068 | 1 |
| SMALL INTESTINE GANGRENE                         | 10041126 | 1 |
| SNAKE BITE                                       | 10041230 | 1 |
| SOLAR URTICARIA                                  | 10041307 | 1 |
| SPINA BIFIDA                                     | 10041524 | 1 |
| SPINAL ANAESTHESIA                               | 10041536 | 1 |
| SPINAL CORD INJURY CAUDA EQUINA                  | 10041553 | 1 |
| SPINE MALFORMATION                               | 10041611 | 1 |
| SPLINTER                                         | 10041662 | 1 |
| SQUAMOUS CELL CARCINOMA OF THE ORAL CAVITY       | 10041857 | 1 |
| SQUAMOUS CELL CARCINOMA OF THE TONGUE            | 10041865 | 1 |
| STAB WOUND                                       | 10041899 | 1 |
| STAPHYLOCOCCAL ABSCESS                           | 10041917 | 1 |
| STERILE PYURIA                                   | 10042010 | 1 |
| STOMATITIS HAEMORRHAGIC                          | 10042132 | 1 |
| SUBCLAVIAN ARTERY EMBOLISM                       | 10042332 | 1 |
| SUPERIOR VENA CAVA SYNDROME                      | 10042569 | 1 |
| SUPEROVULATION                                   | 10042573 | 1 |
| SWEAT DISCOLOURATION                             | 10042652 | 1 |
| SWEAT GLAND DISORDER                             | 10042653 | 1 |
| SYMPHYSIOLYSIS                                   | 10042747 | 1 |
| SYSTEMIC MASTOCYTOSIS                            | 10042949 | 1 |
| SYSTOLIC HYPERTENSION                            | 10042957 | 1 |
| TAKAYASU'S ARTERITIS                             | 10043097 | 1 |
| TANGENTIALITY                                    | 10043114 | 1 |
| TARSAL TUNNEL DECOMPRESSION                      | 10043120 | 1 |
| TATTOO EXCISION                                  | 10043145 | 1 |
| TERATOMA                                         | 10043276 | 1 |
| TETANUS                                          | 10043376 | 1 |

|                                             |          |   |
|---------------------------------------------|----------|---|
| THALASSAEMIA                                | 10043388 | 1 |
| THALASSAEMIA ALPHA                          | 10043390 | 1 |
| THALASSAEMIA MINOR                          | 10043393 | 1 |
| THERAPEUTIC RESPONSE INCREASED              | 10043415 | 1 |
| THERMOGRAM                                  | 10043420 | 1 |
| THIRD STAGE POSTPARTUM HAEMORRHAGE          | 10043449 | 1 |
| THREATENED LABOUR                           | 10043508 | 1 |
| THROMBOANGIITIS OBLITERANS                  | 10043540 | 1 |
| THROMBOSIS PROPHYLAXIS                      | 10043634 | 1 |
| THYMOMA                                     | 10043670 | 1 |
| THYROID NODULE REMOVAL                      | 10043754 | 1 |
| THYROXINE ABNORMAL                          | 10043814 | 1 |
| TINEA CRURIS                                | 10043868 | 1 |
| TOE OPERATION                               | 10043920 | 1 |
| TONGUE NEOPLASM MALIGNANT STAGE UNSPECIFIED | 10043966 | 1 |
| TOOTH DEVELOPMENT DISORDER                  | 10044030 | 1 |
| TOOTH IMPACTED                              | 10044042 | 1 |
| TOTAL LUNG CAPACITY ABNORMAL                | 10044098 | 1 |
| TRACHEAL CANCER                             | 10044285 | 1 |
| TRACHEAL DEVIATION                          | 10044287 | 1 |
| TRACHEAL OEDEMA                             | 10044296 | 1 |
| TRACHEOSTOMY MALFUNCTION                    | 10044322 | 1 |
| TRANSITIONAL CELL CARCINOMA                 | 10044412 | 1 |
| TRAUMATIC DELIVERY                          | 10044520 | 1 |
| TRAUMATIC SPINAL CORD COMPRESSION           | 10044542 | 1 |
| TRI-IODOTHYRONINE UPTAKE DECREASED          | 10044601 | 1 |
| TRICUSPID VALVE REPLACEMENT                 | 10044641 | 1 |
| TRICUSPID VALVE STENOSIS                    | 10044642 | 1 |
| TRIGEMINAL NERVE INJECTION                  | 10044651 | 1 |
| TRISOMY 13                                  | 10044686 | 1 |
| TRUNCUS ARTERIOSUS PERSISTENT               | 10044703 | 1 |
| TULARAEMIA                                  | 10045146 | 1 |
| TUMOUR FLARE                                | 10045169 | 1 |
| TYMPANOPLASTY                               | 10045217 | 1 |
| ULTRASOUND EYE NORMAL                       | 10045418 | 1 |
| ULTRASOUND PROSTATE                         | 10045431 | 1 |
| ULTRASOUND SKULL NORMAL                     | 10045444 | 1 |
| UMBILICAL CORD SHORT                        | 10045453 | 1 |
| UMBILICAL HERNIA REPAIR                     | 10045462 | 1 |
| URETERIC CANCER                             | 10046392 | 1 |
| URETERIC INJURY                             | 10046405 | 1 |
| URETEROLITHOTOMY                            | 10046412 | 1 |
| URETEROSCOPY ABNORMAL                       | 10046414 | 1 |

|                                        |          |   |
|----------------------------------------|----------|---|
| URETHRAL INJURY                        | 10046454 | 1 |
| URETHRAL OBSTRUCTION                   | 10046459 | 1 |
| URETHRAL SYNDROME                      | 10046477 | 1 |
| URINARY BLADDER RUPTURE                | 10046530 | 1 |
| URINARY NITROGEN INCREASED             | 10046547 | 1 |
| URINARY TRACT INFECTION NEONATAL       | 10046573 | 1 |
| URINE DELTA AMINOLEVULINATE NORMAL     | 10046627 | 1 |
| URINE ELECTROLYTES ABNORMAL            | 10046631 | 1 |
| URINE ELECTROPHORESIS ABNORMAL         | 10046636 | 1 |
| URINE POTASSIUM                        | 10046660 | 1 |
| URINE POTASSIUM DECREASED              | 10046662 | 1 |
| URINE SODIUM INCREASED                 | 10046672 | 1 |
| UROGENITAL FISTULA                     | 10046696 | 1 |
| UROSTOMY                               | 10046713 | 1 |
| URTICARIA PIGMENTOSA                   | 10046752 | 1 |
| UTERINE ATONY                          | 10046763 | 1 |
| UTERINE ATROPHY                        | 10046764 | 1 |
| UTERINE INVERSION                      | 10046796 | 1 |
| UTERINE MALPOSITION                    | 10046800 | 1 |
| UTERINE POLYPECTOMY                    | 10046813 | 1 |
| VAGINAL PROLAPSE                       | 10046940 | 1 |
| VASCULAR RESISTANCE SYSTEMIC           | 10047105 | 1 |
| VASCULAR RESISTANCE SYSTEMIC DECREASED | 10047106 | 1 |
| VASCULAR RESISTANCE SYSTEMIC INCREASED | 10047107 | 1 |
| VASOMOTOR RHINITIS                     | 10047145 | 1 |
| VENA CAVA INJURY                       | 10047194 | 1 |
| VENOOCCLUSIVE LIVER DISEASE            | 10047216 | 1 |
| VENOUS PRESSURE JUGULAR                | 10047237 | 1 |
| VENOUS VALVE RUPTURED                  | 10047261 | 1 |
| VENTRICULAR CISTERNOSTOMY              | 10047286 | 1 |
| VIRAL TONSILLITIS                      | 10047480 | 1 |
| VISUAL ACUITY REDUCED TRANSIENTLY      | 10047532 | 1 |
| VISUAL EVOKED POTENTIALS               | 10047547 | 1 |
| VISUAL EVOKED POTENTIALS ABNORMAL      | 10047549 | 1 |
| VITAL CAPACITY ABNORMAL                | 10047580 | 1 |
| VITAMIN B1 DEFICIENCY                  | 10047601 | 1 |
| VITAMIN B6 ABNORMAL                    | 10047614 | 1 |
| VITAMIN B6 DECREASED                   | 10047616 | 1 |
| VITAMIN C INCREASED                    | 10047624 | 1 |
| VITAMIN C NORMAL                       | 10047625 | 1 |
| VITAMIN K DEFICIENCY                   | 10047634 | 1 |
| VITH NERVE INJURY                      | 10047639 | 1 |
| VITREOUS OPACITIES                     | 10047658 | 1 |



|                                       |          |   |
|---------------------------------------|----------|---|
| VOCAL CORD POLYP                      | 10047675 | 1 |
| VOLUME BLOOD INCREASED                | 10047690 | 1 |
| VOMITING PSYCHOGENIC                  | 10047709 | 1 |
| VTH NERVE INJURY                      | 10047723 | 1 |
| VULVAL CANCER                         | 10047741 | 1 |
| VULVAL CELLULITIS                     | 10047752 | 1 |
| VULVOVAGINITIS TRICHOMONAL            | 10047799 | 1 |
| WANDERING PACEMAKER                   | 10047818 | 1 |
| WEBER TUNING FORK TEST                | 10047877 | 1 |
| WERNICKE'S ENCEPHALOPATHY             | 10047911 | 1 |
| WHITE BLOOD CELLS STOOL NEGATIVE      | 10047962 | 1 |
| WITHDRAWAL HYPERTENSION               | 10048007 | 1 |
| WOLFF-PARKINSON-WHITE SYNDROME        | 10048015 | 1 |
| XANTHOMATOSIS                         | 10048215 | 1 |
| ZINC DEFICIENCY                       | 10048259 | 1 |
| VASCULITIS GASTROINTESTINAL           | 10048319 | 1 |
| RUPTURED ECTOPIC PREGNANCY            | 10048407 | 1 |
| GENITAL INFECTION                     | 10048461 | 1 |
| BIOPSY CHORIONIC VILLOUS ABNORMAL     | 10048537 | 1 |
| POST THROMBOTIC SYNDROME              | 10048591 | 1 |
| PSEUDARTHROSIS                        | 10048617 | 1 |
| FACTOR VIII INHIBITION                | 10048619 | 1 |
| HYPEREOSINOPHILIC SYNDROME            | 10048643 | 1 |
| AGNOSIA                               | 10048663 | 1 |
| TEAR DISCOLOURATION                   | 10048673 | 1 |
| ANTI-ERYTHROPOIETIN ANTIBODY POSITIVE | 10048681 | 1 |
| RHEUMATOID NODULE                     | 10048694 | 1 |
| LIPOSUCTION                           | 10048701 | 1 |
| PNEUMOCEPHALUS                        | 10048736 | 1 |
| DERMATOSIS                            | 10048768 | 1 |
| CEREBRAL HAEMANGIOMA                  | 10048788 | 1 |
| BILIARY ADENOMA                       | 10048798 | 1 |
| HYPOGLYCAEMIC SEIZURE                 | 10048803 | 1 |
| LARYNGEAL VENTRICLE PROLAPSE          | 10048805 | 1 |
| NECROTISING SCLERITIS                 | 10048851 | 1 |
| OSTEOPATHIC TREATMENT                 | 10048881 | 1 |
| RADIATION OESOPHAGITIS                | 10048899 | 1 |
| BOREDOM                               | 10048909 | 1 |
| FACTOR V DEFICIENCY                   | 10048930 | 1 |
| ANGIOLIPOMA                           | 10048945 | 1 |
| PARADOXICAL DRUG REACTION             | 10048958 | 1 |
| STREPTOCOCCAL SEPSIS                  | 10048960 | 1 |
| PANCREATIC ABSCESS                    | 10048984 | 1 |

|                                              |          |   |
|----------------------------------------------|----------|---|
| SPINAL CORD HAEMORRHAGE                      | 10048992 | 1 |
| ENCEPHALITIS BRAIN STEM                      | 10048997 | 1 |
| ACUTE PHASE REACTION                         | 10048998 | 1 |
| ACCELERATED IDIOVENTRICULAR RHYTHM           | 10049003 | 1 |
| ANGELMAN'S SYNDROME                          | 10049004 | 1 |
| ANTI FACTOR VIII ANTIBODY POSITIVE           | 10049013 | 1 |
| DENTURE WEARER                               | 10049029 | 1 |
| LDL/HDL RATIO INCREASED                      | 10049030 | 1 |
| GENOTYPE DRUG RESISTANCE TEST                | 10049031 | 1 |
| COMA ACIDOTIC                                | 10049037 | 1 |
| APPLICATION SITE INFLAMMATION                | 10049042 | 1 |
| SPINDLE CELL SARCOMA                         | 10049067 | 1 |
| NORMAL FOETUS                                | 10049081 | 1 |
| OESOPHAGITIS ULCERATIVE                      | 10049098 | 1 |
| PREMENSTRUAL HEADACHE                        | 10049122 | 1 |
| NEUTROPENIC SEPSIS                           | 10049151 | 1 |
| RED BLOOD CELL ENZYMES ABNORMAL              | 10049191 | 1 |
| ELECTROCARDIOGRAM ST-T SEGMENT DEPRESSION    | 10049224 | 1 |
| ANKYLOGLOSSIA CONGENITAL                     | 10049244 | 1 |
| WOLFF-PARKINSON-WHITE SYNDROME CONGENITAL    | 10049291 | 1 |
| GINGIVAL OEDEMA                              | 10049305 | 1 |
| PRECANCEROUS SKIN LESION                     | 10049422 | 1 |
| ANTI-ISLET CELL ANTIBODY POSITIVE            | 10049439 | 1 |
| FIBROMATOSIS                                 | 10049444 | 1 |
| URETHRAL ULCER                               | 10049448 | 1 |
| ERYTHROPOIESIS ABNORMAL                      | 10049467 | 1 |
| ERYTHROID SERIES ABNORMAL                    | 10049472 | 1 |
| URETHRAL CYST                                | 10049502 | 1 |
| BRAIN STEM AUDITORY EVOKED RESPONSE ABNORMAL | 10049509 | 1 |
| STOMATOCYTES PRESENT                         | 10049536 | 1 |
| AFTERBIRTH PAIN                              | 10049589 | 1 |
| UPPER RESPIRATORY TRACT INFLAMMATION         | 10049590 | 1 |
| FUNGAL OESOPHAGITIS                          | 10049656 | 1 |
| ABDOMINAL MIGRAINE                           | 10049714 | 1 |
| METASTASES TO STOMACH                        | 10049718 | 1 |
| BLOOD HOMOCYSTEINE DECREASED                 | 10049734 | 1 |
| BLOOD HOMOCYSTEINE ABNORMAL                  | 10049735 | 1 |
| TUMOUR HAEMORRHAGE                           | 10049750 | 1 |
| PITUITARY HAEMORRHAGE                        | 10049760 | 1 |
| VENTRICULAR PRE-EXCITATION                   | 10049761 | 1 |
| NEONATAL TACHYCARDIA                         | 10049775 | 1 |
| URINARY BLADDER POLYP                        | 10049794 | 1 |
| EXTRASKELETAL OSSIFICATION                   | 10049811 | 1 |

|                                   |          |   |
|-----------------------------------|----------|---|
| BONE INFARCTION                   | 10049824 | 1 |
| JOINT DISLOCATION POSTOPERATIVE   | 10049912 | 1 |
| MEDIASTINAL HAEMATOMA             | 10049941 | 1 |
| INTERCOSTAL NEURALGIA             | 10049949 | 1 |
| INTRACRANIAL HYPOTENSION          | 10049977 | 1 |
| CERVIX HAEMATOMA UTERINE          | 10050020 | 1 |
| CERVIX HAEMORRHAGE UTERINE        | 10050022 | 1 |
| NEONATAL HYPOXIA                  | 10050081 | 1 |
| ELECTRONEUROMYOGRAPHY             | 10050116 | 1 |
| TEMPOROMANDIBULAR JOINT SURGERY   | 10050123 | 1 |
| ELECTRONEUROGRAPHY                | 10050127 | 1 |
| ADNEXA UTERI CYST                 | 10050203 | 1 |
| SKIN FIBROSIS                     | 10050207 | 1 |
| PAGET-SCHROETTER SYNDROME         | 10050216 | 1 |
| FAECAL VOLUME DECREASED           | 10050248 | 1 |
| CASTLEMAN'S DISEASE               | 10050251 | 1 |
| URINE CALCIUM INCREASED           | 10050278 | 1 |
| BODY SURFACE AREA                 | 10050311 | 1 |
| MAXIMUM HEART RATE                | 10050312 | 1 |
| GINGIVAL OPERATION                | 10050338 | 1 |
| OROPHARYNGEAL CANDIDIASIS         | 10050346 | 1 |
| ELECTROCARDIOGRAM T WAVE BIPHASIC | 10050382 | 1 |
| ELECTROCARDIOGRAM P WAVE NORMAL   | 10050383 | 1 |
| PERIPANCREATIC FLUID COLLECTION   | 10050466 | 1 |
| EYELID TUMOUR                     | 10050497 | 1 |
| NEUROPATHIC ULCER                 | 10050502 | 1 |
| METASTATIC RENAL CELL CARCINOMA   | 10050513 | 1 |
| EDENTULOUS                        | 10050585 | 1 |
| ANORECTAL OPERATION               | 10050622 | 1 |
| BLOOD ELASTASE                    | 10050642 | 1 |
| BLOOD ERYTHROPOIETIN              | 10050648 | 1 |
| BLOOD ERYTHROPOIETIN NORMAL       | 10050670 | 1 |
| ANTI-INSULIN ANTIBODY             | 10050692 | 1 |
| FALLOPIAN TUBE CYST               | 10050697 | 1 |
| TOTAL FLUID OUTPUT                | 10050709 | 1 |
| SELF-MEDICATION                   | 10050729 | 1 |
| ATRIAL NATRIURETIC PEPTIDE        | 10050734 | 1 |
| BLOOD GASTRIN                     | 10050751 | 1 |
| LEUKOCYTURIA                      | 10050791 | 1 |
| GROIN INFECTION                   | 10050821 | 1 |
| CARDIOACTIVE DRUG LEVEL INCREASED | 10050845 | 1 |
| LIMB PROSTHESIS USER              | 10050861 | 1 |
| FOOT PROSTHESIS USER              | 10050863 | 1 |

|                                              |          |   |
|----------------------------------------------|----------|---|
| PORTAL HYPERTENSIVE GASTROPATHY              | 10050897 | 1 |
| DECREASED VENTRICULAR AFTERLOAD              | 10050906 | 1 |
| PROMYELOCYTE COUNT                           | 10050968 | 1 |
| URINE NITROGEN                               | 10050970 | 1 |
| LYMPHORRHOEA                                 | 10050979 | 1 |
| FIBRINOUS BRONCHITIS                         | 10051011 | 1 |
| HOMANS' SIGN POSITIVE                        | 10051031 | 1 |
| EYE NAEVUS                                   | 10051045 | 1 |
| RENAL SURGERY                                | 10051061 | 1 |
| PURULENT PERICARDITIS                        | 10051071 | 1 |
| PUNCTURE SITE HAEMORRHAGE                    | 10051101 | 1 |
| CD4/CD8 RATIO INCREASED                      | 10051121 | 1 |
| HYPOFIBRINOGENAEMIA                          | 10051125 | 1 |
| SCLERITIS ALLERGIC                           | 10051126 | 1 |
| FOETAL HEART RATE INCREASED                  | 10051138 | 1 |
| HYPERVISCOSITY SYNDROME                      | 10051151 | 1 |
| ELECTROCARDIOGRAM QRS COMPLEX SHORTENED      | 10051158 | 1 |
| HEPATITIS B CORE ANTIGEN                     | 10051160 | 1 |
| OXYGEN SATURATION IMMEASURABLE               | 10051197 | 1 |
| SPEECH REHABILITATION                        | 10051212 | 1 |
| ADENOIDITIS                                  | 10051223 | 1 |
| URETERITIS                                   | 10051250 | 1 |
| XANTHOGRANULOMA                              | 10051251 | 1 |
| ABDOMINAL WALL INFECTION                     | 10051254 | 1 |
| PROTEIN S DEFICIENCY                         | 10051292 | 1 |
| PROTEIN C DEFICIENCY                         | 10051298 | 1 |
| LIGAMENT CALCIFICATION                       | 10051326 | 1 |
| POST TRANSPLANT LYMPHOPROLIFERATIVE DISORDER | 10051358 | 1 |
| MYOFASCIAL SPASM                             | 10051378 | 1 |
| THROMBIN TIME PROLONGED                      | 10051390 | 1 |
| URINE AMPHETAMINE POSITIVE                   | 10051400 | 1 |
| CARBOHYDRATE ANTIGEN 15-3 INCREASED          | 10051415 | 1 |
| CARBOHYDRATE ANTIGEN 27.29 INCREASED         | 10051419 | 1 |
| THYROXIN BINDING GLOBULIN                    | 10051424 | 1 |
| BIOPSY PANCREAS                              | 10051470 | 1 |
| PROSTATOMEGALY                               | 10051482 | 1 |
| CHONDROMATOSIS                               | 10051503 | 1 |
| TRANSCRANIAL MAGNETIC STIMULATION            | 10051505 | 1 |
| VIRAL SINUSITIS                              | 10051513 | 1 |
| VOCAL CORD CYST                              | 10051515 | 1 |
| CHVOSTEK'S SIGN                              | 10051518 | 1 |
| LEUKAPHERESIS                                | 10051524 | 1 |
| CAROTIDYNYIA                                 | 10051550 | 1 |

|                                              |          |   |
|----------------------------------------------|----------|---|
| CORNEAL BLEEDING                             | 10051558 | 1 |
| CORNEAL DEFECT                               | 10051559 | 1 |
| CHEST WALL ABSCESS                           | 10051568 | 1 |
| ABDOMINAL WALL CYST                          | 10051634 | 1 |
| AMNIORRHESIS                                 | 10051641 | 1 |
| OVARIAN FIBROSIS                             | 10051657 | 1 |
| METASTASES TO OESOPHAGUS                     | 10051671 | 1 |
| METASTASES TO TRACHEA                        | 10051685 | 1 |
| CALCIPHYLAXIS                                | 10051714 | 1 |
| FLUCTUANCE                                   | 10051723 | 1 |
| WHITE BLOOD CELL SCAN                        | 10051726 | 1 |
| PERICARDIAL CYST                             | 10051730 | 1 |
| PANCREAS INFECTION                           | 10051741 | 1 |
| GALACTOGRAPHY                                | 10051743 | 1 |
| GASTRITIS VIRAL                              | 10051791 | 1 |
| BLOOD BETA-D-GLUCAN ABNORMAL                 | 10051795 | 1 |
| TRACHEAL INJURY                              | 10051867 | 1 |
| ACUTE CHEST SYNDROME                         | 10051895 | 1 |
| ADRENOMEGALY                                 | 10051896 | 1 |
| PROMOTION OF PERIPHERAL CIRCULATION          | 10051897 | 1 |
| CEREBROVASCULAR OPERATION                    | 10051902 | 1 |
| CHOLESTEROSIS                                | 10051914 | 1 |
| OESOPHAGEAL POLYP                            | 10051935 | 1 |
| OOCYTE HARVEST                               | 10051936 | 1 |
| OVARIOCENTESIS                               | 10051939 | 1 |
| PNEUMATOSIS                                  | 10051986 | 1 |
| INTERNAL HERNIA                              | 10051989 | 1 |
| CORTICAL LAMINAR NECROSIS                    | 10051990 | 1 |
| LIP EROSION                                  | 10051992 | 1 |
| PACEMAKER SYNDROME                           | 10051994 | 1 |
| SPONDYLOLYSIS                                | 10052013 | 1 |
| FACET JOINT BLOCK                            | 10052018 | 1 |
| NEURAL TUBE DEFECT                           | 10052046 | 1 |
| VAGAL NERVE STIMULATOR IMPLANTATION          | 10052077 | 1 |
| VAGAL NERVE STIMULATOR REMOVAL               | 10052078 | 1 |
| FALLOPIAN TUBE DISORDER                      | 10052094 | 1 |
| CONJUNCTIVAL BLEB                            | 10052114 | 1 |
| MYELOBLAST PERCENTAGE INCREASED              | 10052226 | 1 |
| ALLERGY PROPHYLAXIS                          | 10066536 | 1 |
| DRY SKIN PROPHYLAXIS                         | 10066596 | 1 |
| OVARIAN CANCER RECURRENT                     | 10066697 | 1 |
| BLADDER TRANSITIONAL CELL CARCINOMA STAGE IV | 10066752 | 1 |
| INJECTION SITE RECALL REACTION               | 10066797 | 1 |

|                                                        |          |   |
|--------------------------------------------------------|----------|---|
| N-TELOPEPTIDE                                          | 10066811 | 1 |
| ACTIVATION SYNDROME                                    | 10066817 | 1 |
| EAGLE'S SYNDROME                                       | 10066835 | 1 |
| TACITURNITY                                            | 10066855 | 1 |
| TRICUSPID VALVE PROLAPSE                               | 10066862 | 1 |
| GALLBLADDER CANCER METASTATIC                          | 10066879 | 1 |
| EPIDEMIC POLYARTHRITIS                                 | 10066919 | 1 |
| MYXOFIBROSARCOMA                                       | 10066948 | 1 |
| PROCEDURAL NAUSEA                                      | 10066962 | 1 |
| PROCEDURAL VOMITING                                    | 10066963 | 1 |
| SUPERINFECTION BACTERIAL                               | 10066972 | 1 |
| ANAPHYLACTOID SYNDROME OF PREGNANCY                    | 10067010 | 1 |
| ENDOSCOPIC ULTRASOUND NORMAL                           | 10067021 | 1 |
| AMNIOTIC FLUID INDEX                                   | 10067078 | 1 |
| HYPOGLOSSAL NERVE PARESIS                              | 10067129 | 1 |
| CONGENITAL ABDOMINAL HERNIA                            | 10067183 | 1 |
| NAEVUS FLAMMEUS                                        | 10067193 | 1 |
| REBOUND TACHYCARDIA                                    | 10067207 | 1 |
| UTERINE FIBROSIS                                       | 10067269 | 1 |
| CEREBRAL MICROHAEMORRHAGE                              | 10067277 | 1 |
| SLEEP-RELATED EATING DISORDER                          | 10067315 | 1 |
| ARRHYTHMIC STORM                                       | 10067339 | 1 |
| SPINAL MENINGEAL CYST                                  | 10067375 | 1 |
| HEPATIC ANGIOSARCOMA                                   | 10067388 | 1 |
| HUMAN SEMINAL PLASMA HYPERSENSITIVITY                  | 10067432 | 1 |
| ARTERIAL COMPRESSION THERAPY                           | 10067438 | 1 |
| ROTAVIRUS INFECTION                                    | 10067470 | 1 |
| UHTHOFF'S PHENOMENON                                   | 10067485 | 1 |
| SLEEP INERTIA                                          | 10067493 | 1 |
| SEGMENTED HYALINISING VASCULITIS                       | 10067527 | 1 |
| BLOOD CREATINE PHOSPHOKINASE MB DECREASED              | 10067537 | 1 |
| CEREBRAL SALT-WASTING SYNDROME                         | 10067548 | 1 |
| PNEUMONIA CRYPTOCOCCAL                                 | 10067565 | 1 |
| NEUROGENIC HYPERTENSION                                | 10067598 | 1 |
| EPIDURAL LIPOMATOSIS                                   | 10067599 | 1 |
| CARTILAGE ATROPHY                                      | 10067632 | 1 |
| SYSTEMIC LUPUS ERYTHEMATOSUS DISEASE ACTIVITY INDEX II | 10067657 | 1 |
| PREGNANCY ON CONTRACEPTIVE                             | 10067667 | 1 |
| IRIS BOMBE                                             | 10067684 | 1 |
| EX-DRUG ABUSER                                         | 10067689 | 1 |
| OPHTHALMIC FLUID-AIR EXCHANGE PROCEDURE                | 10067701 | 1 |
| INTRAPARTUM HAEMORRHAGE                                | 10067703 | 1 |
| HYPERLIPASAEMIA                                        | 10067725 | 1 |

|                                                  |          |   |
|--------------------------------------------------|----------|---|
| UMBILICAL GRANULOMA                              | 10067731 | 1 |
| UTERINE CERVIX STENOSIS                          | 10067732 | 1 |
| COAGULATION FACTOR DEFICIENCY                    | 10067787 | 1 |
| ABDOMINAL WALL HAEMORRHAGE                       | 10067788 | 1 |
| COMMUNITY ACQUIRED INFECTION                     | 10067822 | 1 |
| SPLENIC VARICES                                  | 10067823 | 1 |
| ENDOBONCHIAL VALVE IMPLANTATION                  | 10067851 | 1 |
| GASTRIC OCCULT BLOOD POSITIVE                    | 10067855 | 1 |
| NEUROSURGERY                                     | 10067908 | 1 |
| LONG THORACIC NERVE PALSY                        | 10067925 | 1 |
| EASTERN COOPERATIVE ONCOLOGY GROUP PERFORMANCE S | 10067961 | 1 |
| AORTIC INTRAMURAL HAEMATOMA                      | 10067975 | 1 |
| INJECTION SITE VASCULITIS                        | 10067995 | 1 |
| COMPULSIVE HOARDING                              | 10068007 | 1 |
| TRIGEMINAL NERVE PARESIS                         | 10068008 | 1 |
| THERMOHYPOAESTHESIA                              | 10068009 | 1 |
| TEMPERATURE PERCEPTION TEST ABNORMAL             | 10068013 | 1 |
| TEMPERATURE PERCEPTION TEST INCREASED            | 10068014 | 1 |
| PROBIOTIC THERAPY                                | 10068048 | 1 |
| DEPENDENT RUBOR                                  | 10068057 | 1 |
| ACCESSORY SPLEEN                                 | 10068059 | 1 |
| THYROID HORMONE REPLACEMENT THERAPY              | 10068076 | 1 |
| UVEITIS-GLAUCOMA-HYPHAEMA SYNDROME               | 10068148 | 1 |
| ATRIOVENTRICULAR CONDUCTION TIME SHORTENED       | 10068180 | 1 |
| AUTONOMIC DYSREFLEXIA                            | 10068196 | 1 |
| ANTIANGIOGENIC THERAPY                           | 10068301 | 1 |
| URETHRAL ATROPHY                                 | 10068313 | 1 |
| CARDIOTHORACIC RATIO                             | 10068336 | 1 |
| HEPATITIS C RNA INCREASED                        | 10068377 | 1 |
| VENOUS OXYGEN PARTIAL PRESSURE                   | 10068421 | 1 |
| VENOUS OXYGEN SATURATION INCREASED               | 10068426 | 1 |
| IDIOPATHIC GUTTATE HYPOMELANOSIS                 | 10068489 | 1 |
| NATURAL KILLER CELL COUNT INCREASED              | 10068496 | 1 |
| NATURAL KILLER T CELL COUNT                      | 10068498 | 1 |
| NATURAL KILLER T CELL COUNT INCREASED            | 10068499 | 1 |
| SOFT TISSUE ATROPHY                              | 10068548 | 1 |
| ANAL FUNGAL INFECTION                            | 10068556 | 1 |
| BREAST SARCOMA                                   | 10068582 | 1 |
| PERITONEAL FLUID ANALYSIS NORMAL                 | 10068624 | 1 |
| CHRONOTROPIC INCOMPETENCE                        | 10068627 | 1 |
| PROSTHETIC VESSEL IMPLANTATION                   | 10068628 | 1 |
| DOWLING-DEGOS DISEASE                            | 10068651 | 1 |
| NAIL INJURY                                      | 10068655 | 1 |

|                                                   |          |   |
|---------------------------------------------------|----------|---|
| LIVER SARCOIDOSIS                                 | 10068664 | 1 |
| PULMONARY VEIN OCCLUSION                          | 10068690 | 1 |
| UMBILICAL HAEMATOMA                               | 10068712 | 1 |
| HEPATITIS D VIRUS TEST                            | 10068787 | 1 |
| ANTISYNTHEASE SYNDROME                            | 10068801 | 1 |
| WEST NILE VIRUS TEST POSITIVE                     | 10068812 | 1 |
| CONJUNCTIVAL PALLOR                               | 10068819 | 1 |
| PANCREATIC CALCIFICATION                          | 10068823 | 1 |
| FUNGATING WOUND                                   | 10068834 | 1 |
| AIRWAY PEAK PRESSURE INCREASED                    | 10068853 | 1 |
| URINARY STONE ANALYSIS                            | 10068860 | 1 |
| ANGIOSCOPY                                        | 10068866 | 1 |
| GENITAL HYPOAESTHESIA                             | 10068912 | 1 |
| ANORECTAL VARICES                                 | 10068924 | 1 |
| GASTROINTESTINAL EXAMINATION ABNORMAL             | 10068977 | 1 |
| VON WILLEBRAND'S FACTOR ACTIVITY INCREASED        | 10068987 | 1 |
| VON WILLEBRAND'S FACTOR ANTIGEN ABNORMAL          | 10068989 | 1 |
| TUBULOINTERSTITIAL NEPHRITIS AND UVEITIS SYNDROME | 10069034 | 1 |
| HISTIOCYTIC NECROTISING LYMPHADENITIS             | 10069070 | 1 |
| ATROPHIC GLOSSITIS                                | 10069085 | 1 |
| HEPATIC VEIN DILATATION                           | 10069112 | 1 |
| TRACHEOBRONCHIAL STENT INSERTION                  | 10069120 | 1 |
| MYOCARDIAL DEPRESSION                             | 10069140 | 1 |
| ALDOLASE ABNORMAL                                 | 10069154 | 1 |
| ABNORMAL WITHDRAWAL BLEEDING                      | 10069195 | 1 |
| PRODUCT IDENTIFICATION NUMBER ISSUE               | 10069267 | 1 |
| PHYSICAL PRODUCT LABEL ISSUE                      | 10069272 | 1 |
| PRODUCT CLOSURE ISSUE                             | 10069295 | 1 |
| ACUTE LUNG INJURY                                 | 10069351 | 1 |
| PRODUCT PACKAGING ISSUE                           | 10069405 | 1 |
| LYMPHATIC FISTULA                                 | 10069421 | 1 |
| HASHIMOTO'S ENCEPHALOPATHY                        | 10069432 | 1 |
| BONE GRAFT REMOVAL                                | 10069436 | 1 |
| HENOCH-SCHONLEIN PURPURA NEPHRITIS                | 10069440 | 1 |
| LYMPHATIC DUCT INJURY                             | 10069449 | 1 |
| HYPOGLOSSAL NERVE PARALYSIS                       | 10069450 | 1 |
| ACQUIRED VON WILLEBRAND'S DISEASE                 | 10069495 | 1 |
| INTRAPERICARDIAL THROMBOSIS                       | 10069550 | 1 |
| BRAIN MIDLINE SHIFT                               | 10069551 | 1 |
| ATRIOVENTRICULAR DISSOCIATION                     | 10069571 | 1 |
| PNEUMOCOCCAL IMMUNISATION                         | 10069578 | 1 |
| VACCINATION SITE ULCER                            | 10069621 | 1 |
| CAMPTOCORMIA                                      | 10069646 | 1 |



|                                                  |          |   |
|--------------------------------------------------|----------|---|
| URINARY STRAINING                                | 10069648 | 1 |
| MESENTERITIS                                     | 10069665 | 1 |
| HTLV-1 CARRIER                                   | 10069712 | 1 |
| NEUROTROPHIC KERATOPATHY                         | 10069732 | 1 |
| INTERNAL FIXATION OF SPINE                       | 10069749 | 1 |
| THYROID DERMATOPATHY                             | 10069771 | 1 |
| RESPIRATORY SYNCYTIAL VIRUS BRONCHITIS           | 10069811 | 1 |
| NEUROLOGICAL COMPLICATION ASSOCIATED WITH DEVICE | 10069836 | 1 |
| STENT MALFUNCTION                                | 10069862 | 1 |
| ANTIRIBOSOMAL P ANTIBODY POSITIVE                | 10069910 | 1 |
| RENAL ARTERY STENT REMOVAL                       | 10069948 | 1 |
| BILE DUCT STENT REMOVAL                          | 10069951 | 1 |
| ACTINOMYCES TEST POSITIVE                        | 10069956 | 1 |
| BACTEROIDES TEST POSITIVE                        | 10069958 | 1 |
| MICROCOCCUS TEST POSITIVE                        | 10070001 | 1 |
| PEPTOSTREPTOCOCCUS TEST POSITIVE                 | 10070003 | 1 |
| PROPIONIBACTERIUM TEST POSITIVE                  | 10070004 | 1 |
| STENOTROPHOMONAS TEST POSITIVE                   | 10070006 | 1 |
| PANTOEIA AGGLOMERANS TEST POSITIVE               | 10070019 | 1 |
| BRUCELLA TEST POSITIVE                           | 10070021 | 1 |
| CAMPYLOBACTER TEST POSITIVE                      | 10070025 | 1 |
| CORYNEBACTERIUM TEST POSITIVE                    | 10070028 | 1 |
| LEGIONELLA TEST POSITIVE                         | 10070092 | 1 |
| LISTERIA TEST POSITIVE                           | 10070094 | 1 |
| SHIGELLA TEST POSITIVE                           | 10070129 | 1 |
| DENGUE VIRUS TEST POSITIVE                       | 10070225 | 1 |
| VIRAL TITRE DECREASED                            | 10070251 | 1 |
| METHYLENETETRAHYDROFOLATE REDUCTASE DEFICIENCY   | 10070309 | 1 |
| AMINOPYRINE BREATHING TEST                       | 10070311 | 1 |
| TRANSIENT ELASTOGRAPHY                           | 10070321 | 1 |
| APHTHOVIRUS TEST POSITIVE                        | 10070340 | 1 |
| PNEUMOVIRUS TEST POSITIVE                        | 10070345 | 1 |
| UNEVALUABLE INVESTIGATION                        | 10070435 | 1 |
| PNEUMOCYSTIS TEST POSITIVE                       | 10070454 | 1 |
| ARTHROTOMY                                       | 10070463 | 1 |
| DRUG ADMINISTERED IN WRONG DEVICE                | 10070470 | 1 |
| AQUEOUS HUMOUR LEAKAGE                           | 10070497 | 1 |
| TRAUMATIC RENAL INJURY                           | 10070510 | 1 |
| POST STROKE DEPRESSION                           | 10070606 | 1 |
| VESSEL PUNCTURE SITE INFLAMMATION                | 10070647 | 1 |
| CORTICAL DYSPLASIA                               | 10070666 | 1 |
| HUNTINGTON'S DISEASE                             | 10070668 | 1 |
| FALSE NEGATIVE INVESTIGATION RESULT              | 10070747 | 1 |

|                                         |          |   |
|-----------------------------------------|----------|---|
| THERAPEUTIC NERVE ABLATION              | 10070755 | 1 |
| BONE DECALCIFICATION                    | 10070817 | 1 |
| REACTIVE AIRWAYS DYSFUNCTION SYNDROME   | 10070832 | 1 |
| PULMONARY SENSITISATION                 | 10070838 | 1 |
| UTERINE LEIOMYOMA EMBOLISATION          | 10070867 | 1 |
| JOINT LAXITY                            | 10070874 | 1 |
| MALARIA ANTIBODY TEST POSITIVE          | 10070881 | 1 |
| OVARIAN CANCER STAGE III                | 10070907 | 1 |
| METASTASES TO PELVIS                    | 10070913 | 1 |
| PULMONARY PHYSICAL EXAMINATION ABNORMAL | 10070936 | 1 |
| PULMONARY PHYSICAL EXAMINATION NORMAL   | 10070937 | 1 |
| ANAL EXAMINATION ABNORMAL               | 10070942 | 1 |
| METASTATIC CUTANEOUS CROHN'S DISEASE    | 10070949 | 1 |
| COLPOSCOPY NORMAL                       | 10070980 | 1 |
| VASCULAR COMPRESSION                    | 10070995 | 1 |
| INTRADUCTAL PAPILLARY MUCINOUS NEOPLASM | 10070999 | 1 |
| CREATININE URINE NORMAL                 | 10071020 | 1 |
| CREATININE URINE ABNORMAL               | 10071021 | 1 |
| VITH NERVE PARESIS                      | 10071044 | 1 |
| ANKLE DEFORMITY                         | 10071050 | 1 |
| EYE HAEMANGIOMA                         | 10071053 | 1 |
| ENDOBONCHIAL ULTRASOUND                 | 10071063 | 1 |
| OVARIAN CALCIFICATION                   | 10071064 | 1 |
| AUTOPHOBIA                              | 10071070 | 1 |
| SUBCUTANEOUS BIOPSY ABNORMAL            | 10071140 | 1 |
| OPTIC DISC HYPERAEMIA                   | 10071196 | 1 |
| TROUSSEAU'S SIGN                        | 10071284 | 1 |
| SUSPECTED COUNTERFEIT PRODUCT           | 10071287 | 1 |
| ULTRASOUND URINARY SYSTEM               | 10071295 | 1 |
| MELANOCYTIC HYPERPLASIA                 | 10071308 | 1 |
| SPINAL ARTERY THROMBOSIS                | 10071316 | 1 |
| CENTRAL NERVOUS SYSTEM FUNCTION TEST    | 10071317 | 1 |
| CARBOHYDRATE ANTIGEN 125 NORMAL         | 10071318 | 1 |
| NEUROPSYCHIATRIC SYNDROME               | 10071323 | 1 |
| URINE MAGNESIUM                         | 10071357 | 1 |
| SALIVARY GLAND INDURATION               | 10071363 | 1 |
| PSYCHOLOGICAL TRAUMA                    | 10071368 | 1 |
| LENS EXTRACTION                         | 10071370 | 1 |
| EXPANDED DISABILITY STATUS SCALE        | 10071383 | 1 |
| RETINAL FIBROSIS                        | 10071391 | 1 |
| VANISHING TWIN SYNDROME                 | 10071398 | 1 |
| AXIAL SPONDYLOARTHRITIS                 | 10071400 | 1 |
| MYCOBACTERIUM CHELONAE INFECTION        | 10071401 | 1 |

|                                                    |          |   |
|----------------------------------------------------|----------|---|
| EXPOSURE VIA FATHER                                | 10071403 | 1 |
| MATERNAL EXPOSURE DURING DELIVERY                  | 10071407 | 1 |
| BRACHIORADIAL PRURITUS                             | 10071443 | 1 |
| ANTI-NEURONAL ANTIBODY                             | 10071463 | 1 |
| ANTI-THROMBIN ANTIBODY                             | 10071465 | 1 |
| ANTI-NMDA ANTIBODY                                 | 10071468 | 1 |
| ANTI-ZINC TRANSPORTER 8 ANTIBODY                   | 10071471 | 1 |
| CRYSTAL NEPHROPATHY                                | 10071503 | 1 |
| FOETAL MONITORING ABNORMAL                         | 10071507 | 1 |
| CEREBRAL REVASCULARISATION                         | 10071508 | 1 |
| MESENTERIC HAEMATOMA                               | 10071557 | 1 |
| FLUID WAVE TEST                                    | 10071565 | 1 |
| SUSAC'S SYNDROME                                   | 10071573 | 1 |
| ANAPLASTIC LYMPHOMA RECEPTOR TYROSINE KINASE ASSAY | 10071593 | 1 |
| TRANSMEMBRANE RECEPTOR TYROSINE KINASE ASSAY       | 10071598 | 1 |
| GENETIC POLYMORPHISM                               | 10071602 | 1 |
| FAECAL ELASTASE CONCENTRATION DECREASED            | 10071656 | 1 |
| N-TERMINAL PROHORMONE BRAIN NATRIURETIC PEPTIDE AB | 10071660 | 1 |
| DENTAL LEAKAGE                                     | 10071694 | 1 |
| FOWLER'S SYNDROME                                  | 10071718 | 1 |
| DEVICE FUNCTION TEST                               | 10071743 | 1 |
| MILK SOY PROTEIN INTOLERANCE                       | 10071754 | 1 |
| VIRAL MYELITIS                                     | 10071763 | 1 |
| NEURONE-SPECIFIC ENOLASE INCREASED                 | 10071929 | 1 |
| SUBRETINAL HAEMATOMA                               | 10071935 | 1 |
| CYP2C19 GENE STATUS ASSAY                          | 10071965 | 1 |
| BRCA2 GENE MUTATION ASSAY                          | 10071970 | 1 |
| ENZYME ACTIVITY INCREASED                          | 10072021 | 1 |
| MESENTERIC NEOPLASM                                | 10072025 | 1 |
| CENTRAL NERVOUS SYSTEM HAEMORRHAGE                 | 10072043 | 1 |
| PERINEPHRITIS                                      | 10072058 | 1 |
| ARTIFICIAL SKIN GRAFT                              | 10072067 | 1 |
| GLUCOCORTICOID DEFICIENCY                          | 10072079 | 1 |
| BLADDER WALL CALCIFICATION                         | 10072140 | 1 |
| PAEDIATRIC AUTOIMMUNE NEUROPSYCHIATRIC DISORDERS A | 10072147 | 1 |
| MENISCUS CYST                                      | 10072157 | 1 |
| PUNCTURE SITE SWELLING                             | 10072161 | 1 |
| MYOCARDIAL STUNNING                                | 10072186 | 1 |
| BLADDER INSTILLATION PROCEDURE                     | 10072199 | 1 |
| FASCIAL RUPTURE                                    | 10072209 | 1 |
| GENITAL HERPES ZOSTER                              | 10072210 | 1 |
| POSTERIOR FOSSA DECOMPRESSION                      | 10072283 | 1 |
| X-RAY WITH CONTRAST                                | 10072302 | 1 |

|                                                     |          |   |
|-----------------------------------------------------|----------|---|
| AMYLASE ABNORMAL                                    | 10072327 | 1 |
| LEUKOTRIENE TEST                                    | 10072335 | 1 |
| END-TIDAL CO2                                       | 10072374 | 1 |
| ASYMMETRIC DI-METHYLARGININE INCREASED              | 10072403 | 1 |
| RED BLOOD CELL ANALYSIS ABNORMAL                    | 10072410 | 1 |
| DELIVERY OUTSIDE HEALTH FACILITY                    | 10072446 | 1 |
| FLUORESCENT IN SITU HYBRIDISATION POSITIVE          | 10072468 | 1 |
| GESTATIONAL AGE TEST ABNORMAL                       | 10072479 | 1 |
| NASOGASTRIC OUTPUT ABNORMAL                         | 10072487 | 1 |
| ANTI-IA2 ANTIBODY POSITIVE                          | 10072498 | 1 |
| ANTI-VGCC ANTIBODY POSITIVE                         | 10072502 | 1 |
| ANTI-ACTIN ANTIBODY POSITIVE                        | 10072506 | 1 |
| ANTI-GLOMERULAR BASEMENT MEMBRANE ANTIBODY NEGA     | 10072517 | 1 |
| ANTI-ISLET CELL ANTIBODY NEGATIVE                   | 10072520 | 1 |
| ANTI-ZINC TRANSPORTER 8 ANTIBODY NEGATIVE           | 10072529 | 1 |
| ANTI-ZINC TRANSPORTER 8 ANTIBODY POSITIVE           | 10072530 | 1 |
| CAROTID REVASCULARISATION                           | 10072559 | 1 |
| RECTAL INJURY                                       | 10072587 | 1 |
| UMBILICAL DISCHARGE                                 | 10072595 | 1 |
| INADEQUATE ASEPTIC TECHNIQUE IN USE OF PRODUCT      | 10072608 | 1 |
| ORTHOPAEDIC EXAMINATION NORMAL                      | 10072626 | 1 |
| INTRAHEPATIC PORTAL HEPATIC VENOUS FISTULA          | 10072629 | 1 |
| NOTALGIA PARAESTHETICA                              | 10072643 | 1 |
| VERY LONG-CHAIN ACYL-COENZYME A DEHYDROGENASE DEFIC | 10072656 | 1 |
| TOOTH DEMINERALISATION                              | 10072665 | 1 |
| FIBROBLAST GROWTH FACTOR 23 INCREASED               | 10072680 | 1 |
| UVEITIC GLAUCOMA                                    | 10072686 | 1 |
| HEPATITIS VIRAL TEST POSITIVE                       | 10072748 | 1 |
| CD4 LYMPHOCYTE PERCENTAGE DECREASED                 | 10072798 | 1 |
| BREAST CYST RUPTURE                                 | 10072812 | 1 |
| MONONUCLEAR CELL COUNT ABNORMAL                     | 10072856 | 1 |
| LYMPHATIC MAPPING                                   | 10072871 | 1 |
| DEVICE USE ERROR                                    | 10072878 | 1 |
| URINARY BLADDER TOXICITY                            | 10072996 | 1 |
| PROGRESSIVE FACIAL HEMIATROPHY                      | 10073006 | 1 |
| MALIGNANT NEOPLASM OF UNKNOWN PRIMARY SITE          | 10073059 | 1 |
| GALLBLADDER NEOPLASM                                | 10073072 | 1 |
| TUBULAR BREAST CARCINOMA                            | 10073104 | 1 |
| PLASMA CELL MYELOMA RECURRENT                       | 10073133 | 1 |
| DEDIFFERENTIATED LIPOSARCOMA                        | 10073135 | 1 |
| SOLUBLE FIBRIN MONOMER COMPLEX                      | 10073165 | 1 |
| PYLORIC SPHINCTER INSUFFICIENCY                     | 10073166 | 1 |
| INDUCTION OF CERVIX RIPENING                        | 10073175 | 1 |

|                                                  |          |   |
|--------------------------------------------------|----------|---|
| CORTICOTROPIN-RELEASING HORMONE STIMULATION TEST | 10073178 | 1 |
| ADRENOCORTICOTROPIC HORMONE DEFICIENCY           | 10073179 | 1 |
| BOOSTER DOSE MISSED                              | 10073205 | 1 |
| DYSTONIC TREMOR                                  | 10073210 | 1 |
| POSTURAL TREMOR                                  | 10073211 | 1 |
| PERIPANCREATIC VARICES                           | 10073215 | 1 |
| HEPATITIS A ANTIGEN NEGATIVE                     | 10073225 | 1 |
| IDIOPATHIC ANGIOEDEMA                            | 10073257 | 1 |
| BRENNER TUMOUR                                   | 10073258 | 1 |
| OVARIAN GRANULOSA CELL TUMOUR                    | 10073260 | 1 |
| EXPOSURE VIA BODY FLUID                          | 10073300 | 1 |
| EXPOSURE VIA CONTAMINATED DEVICE                 | 10073301 | 1 |
| EXPOSURE TO RADIATION                            | 10073306 | 1 |
| EXPOSURE TO CONTAMINATED WATER                   | 10073309 | 1 |
| ACCIDENTAL EXPOSURE TO PRODUCT BY CHILD          | 10073318 | 1 |
| WHITE BLOOD CELL ANALYSIS NORMAL                 | 10073322 | 1 |
| DECORTICATE POSTURE                              | 10073345 | 1 |
| GENITAL CONTUSION                                | 10073355 | 1 |
| ADENOCARCINOMA OF APPENDIX                       | 10073359 | 1 |
| APPENDIX CANCER                                  | 10073360 | 1 |
| SMALL INTESTINE ADENOCARCINOMA                   | 10073373 | 1 |
| LARGE INTESTINE BENIGN NEOPLASM                  | 10073394 | 1 |
| CD4 LYMPHOCYTES NORMAL                           | 10073408 | 1 |
| INCISION SITE RASH                               | 10073411 | 1 |
| INJECTION SITE HYPERAESTHESIA                    | 10073418 | 1 |
| BLOOD TRYPSIN                                    | 10073447 | 1 |
| INFLUENZA C VIRUS TEST                           | 10073451 | 1 |
| APPLICATION SITE ACNE                            | 10073457 | 1 |
| PROSTHETIC CARDIAC VALVE MALFUNCTION             | 10073511 | 1 |
| INTERFERON GAMMA RELEASE ASSAY                   | 10073542 | 1 |
| SPINAL SUBARACHNOID HAEMORRHAGE                  | 10073564 | 1 |
| EXPIRED DEVICE USED                              | 10073594 | 1 |
| INSTILLATION SITE EXFOLIATION                    | 10073601 | 1 |
| INSTILLATION SITE HAEMORRHAGE                    | 10073610 | 1 |
| INSTILLATION SITE INDURATION                     | 10073613 | 1 |
| INSTILLATION SITE WARMTH                         | 10073629 | 1 |
| FOETAL MEGACYSTIS                                | 10073660 | 1 |
| CEREBRAL VENTRICLE COLLAPSE                      | 10073706 | 1 |
| ADENOSINE DEAMINASE INCREASED                    | 10073725 | 1 |
| HORMONAL CONTRACEPTION                           | 10073728 | 1 |
| GENITALS ENLARGED                                | 10073740 | 1 |
| THUMB SUCKING                                    | 10073746 | 1 |
| INHIBITING ANTIBODIES POSITIVE                   | 10073771 | 1 |

|                                                      |          |   |
|------------------------------------------------------|----------|---|
| STROKE-LIKE MIGRAINE ATTACKS AFTER RADIATION THERAPY | 10073775 | 1 |
| APPLICATION SITE LACERATION                          | 10073779 | 1 |
| OSTEOCHONDRAL FRACTURE                               | 10073853 | 1 |
| PREICTAL STATE                                       | 10073854 | 1 |
| KETOGENIC DIET                                       | 10073855 | 1 |
| RADIOEMBOLISATION                                    | 10073946 | 1 |
| PROSOPAGNOSIA                                        | 10073980 | 1 |
| ARTERIAL SEGMENTAL PRESSURE TEST                     | 10073986 | 1 |
| PROCEDURAL INTESTINAL PERFORATION                    | 10074065 | 1 |
| PUNCTURE SITE OEDEMA                                 | 10074069 | 1 |
| OESOPHAGEAL COMPRESSION                              | 10074074 | 1 |
| BILIARY ASCITES                                      | 10074150 | 1 |
| DRY LUNG SYNDROME                                    | 10074163 | 1 |
| CRANIOFACIAL DEFORMITY                               | 10074180 | 1 |
| TISSUE EXPANSION PROCEDURE                           | 10074186 | 1 |
| VOLVULUS REPAIR                                      | 10074224 | 1 |
| HERPES SIMPLEX GASTRITIS                             | 10074240 | 1 |
| HERPES SIMPLEX PHARYNGITIS                           | 10074244 | 1 |
| HERPES ZOSTER PHARYNGITIS                            | 10074245 | 1 |
| HERPES SIMPLEX MENINGOENCEPHALITIS                   | 10074247 | 1 |
| HERPES ZOSTER MENINGOENCEPHALITIS                    | 10074248 | 1 |
| HERPES ZOSTER MENINGOMYELITIS                        | 10074251 | 1 |
| HERPES ZOSTER MENINGITIS                             | 10074259 | 1 |
| LYMPH NODE HAEMORRHAGE                               | 10074270 | 1 |
| RIGHT VENTRICULAR HYPERTENSION                       | 10074301 | 1 |
| ANTI B ANTIBODY                                      | 10074304 | 1 |
| FEV1/FVC RATIO                                       | 10074315 | 1 |
| FORCED EXPIRATORY FLOW                               | 10074316 | 1 |
| CARDIOPULMONARY EXERCISE TEST ABNORMAL               | 10074359 | 1 |
| SACROILIAC FRACTURE                                  | 10074362 | 1 |
| RED BREAST SYNDROME                                  | 10074453 | 1 |
| UTERINE MYOMA EXPULSION                              | 10074467 | 1 |
| TRAUMATIC HAEMOTHORAX                                | 10074487 | 1 |
| ADAMTS13 ACTIVITY DECREASED                          | 10074491 | 1 |
| ECTOPIC PREGNANCY WITH CONTRACEPTIVE DEVICE          | 10074497 | 1 |
| BODY MASS INDEX ABNORMAL                             | 10074506 | 1 |
| STOMA SITE ERYTHEMA                                  | 10074514 | 1 |
| UTERINE SCAR                                         | 10074527 | 1 |
| ANTICOAGULATION DRUG LEVEL INCREASED                 | 10074528 | 1 |
| HEPATIC FIBROSIS MARKER TEST                         | 10074593 | 1 |
| COLLOID BRAIN CYST                                   | 10074613 | 1 |
| NONREASSURING FOETAL HEART RATE PATTERN              | 10074641 | 1 |
| FOETAL HEART RATE ACCELERATION ABNORMALITY           | 10074642 | 1 |

|                                                          |          |   |
|----------------------------------------------------------|----------|---|
| NONINFECTIVE CHORIORETINITIS                             | 10074696 | 1 |
| INFECTIVE IRITIS                                         | 10074698 | 1 |
| FORCED VITAL CAPACITY DECREASED                          | 10074722 | 1 |
| PORTAL FIBROSIS                                          | 10074726 | 1 |
| BLOOD VISCOSITY DECREASED                                | 10074727 | 1 |
| BLOOD VISCOSITY ABNORMAL                                 | 10074728 | 1 |
| NECROTISING MYOSITIS                                     | 10074769 | 1 |
| TONGUE POLYP                                             | 10074778 | 1 |
| ADMINISTRATION SITE ERYTHEMA                             | 10074796 | 1 |
| UNHEALTHY DIET                                           | 10074834 | 1 |
| TRANSPLANT DYSFUNCTION                                   | 10074860 | 1 |
| PREVERTEBRAL SOFT TISSUE SWELLING OF CERVICAL SPACE      | 10074880 | 1 |
| EXPULSION OF MEDICATION                                  | 10074905 | 1 |
| APNOEA TEST ABNORMAL                                     | 10074913 | 1 |
| THERAPEUTIC RESPONSE CHANGED                             | 10074941 | 1 |
| URINARY TRACT STOMA COMPLICATION                         | 10074942 | 1 |
| VASCULAR MALFORMATION                                    | 10074979 | 1 |
| WAIST CIRCUMFERENCE                                      | 10074998 | 1 |
| ABNORMAL INVOLUNTARY MOVEMENT SCALE                      | 10075002 | 1 |
| ATYPICAL MYCOBACTERIAL LOWER RESPIRATORY TRACT INFECTION | 10075026 | 1 |
| POLYOMAVIRUS TEST                                        | 10075038 | 1 |
| BK POLYOMAVIRUS TEST                                     | 10075041 | 1 |
| ASPIRIN-EXACERBATED RESPIRATORY DISEASE                  | 10075084 | 1 |
| HEPATITIS E VIRUS TEST                                   | 10075085 | 1 |
| ADMINISTRATION SITE CELLULITIS                           | 10075095 | 1 |
| ADMINISTRATION SITE HYPERSENSITIVITY                     | 10075102 | 1 |
| ADMINISTRATION SITE ODOUR                                | 10075103 | 1 |
| ADMINISTRATION SITE PRURITUS                             | 10075106 | 1 |
| MODEL FOR END STAGE LIVER DISEASE SCORE                  | 10075139 | 1 |
| FRACTIONAL EXCRETION OF SODIUM                           | 10075142 | 1 |
| ANTI-MUELLERIAN HORMONE LEVEL INCREASED                  | 10075157 | 1 |
| ANTI-MUELLERIAN HORMONE LEVEL NORMAL                     | 10075159 | 1 |
| VISUAL ANALOGUE SCALE                                    | 10075166 | 1 |
| PROCEDURAL ANXIETY                                       | 10075204 | 1 |
| CEREBRAL VENTRICULAR RUPTURE                             | 10075249 | 1 |
| TENDON SHEATH DISORDER                                   | 10075252 | 1 |
| ACTIVATED PARTIAL THROMBOPLASTIN TIME RATIO              | 10075283 | 1 |
| ACTIVATED PARTIAL THROMBOPLASTIN TIME RATIO NORMAL       | 10075288 | 1 |
| VENTRICULAR REMODELLING                                  | 10075291 | 1 |
| TARGETED CANCER THERAPY                                  | 10075304 | 1 |
| BLOOD BILIRUBIN UNCONJUGATED DECREASED                   | 10075327 | 1 |
| PORTAL TRACT INFLAMMATION                                | 10075331 | 1 |
| SOFT TISSUE SARCOMA                                      | 10075333 | 1 |

|                                          |          |   |
|------------------------------------------|----------|---|
| CHOLANGITIS INFECTIVE                    | 10075445 | 1 |
| BRACHIOCEPHALIC ARTERY STENOSIS          | 10075450 | 1 |
| STOMA SITE EXTRAVASATION                 | 10075511 | 1 |
| ACINETOBACTER TEST                       | 10075547 | 1 |
| MEDICAL DEVICE SITE ERYTHEMA             | 10075576 | 1 |
| MEDICAL DEVICE SITE INFLAMMATION         | 10075581 | 1 |
| MEDICAL DEVICE SITE SWELLING             | 10075586 | 1 |
| ANTRAL FOLLICLE COUNT                    | 10075595 | 1 |
| COLUMBIA SUICIDE SEVERITY RATING SCALE   | 10075600 | 1 |
| ALLERGY ALERT TEST NEGATIVE              | 10075601 | 1 |
| CEREBROSPINAL FLUID CIRCULATION DISORDER | 10075604 | 1 |
| CD25 ANTIGEN POSITIVE                    | 10075649 | 1 |
| CEREBRAL ARTERY PERFORATION              | 10075734 | 1 |
| BASOPHILOPENIA                           | 10075813 | 1 |
| HUMAN HERPES VIRUS 8 TEST                | 10075833 | 1 |
| NASAL ADHESIONS                          | 10075834 | 1 |
| TONGUE FUNGAL INFECTION                  | 10075845 | 1 |
| AMNIOTIC FLUID INDEX INCREASED           | 10075867 | 1 |
| FIDUCIAL MARKER PLACEMENT                | 10075872 | 1 |
| ADMINISTRATION SITE CALCIFICATION        | 10075925 | 1 |
| ADMINISTRATION SITE DYSAESTHESIA         | 10075930 | 1 |
| ADMINISTRATION SITE INDURATION           | 10075939 | 1 |
| ADMINISTRATION SITE NERVE DAMAGE         | 10075957 | 1 |
| ADMINISTRATION SITE PAPULE               | 10075959 | 1 |
| NEOBLADDER SURGERY                       | 10075996 | 1 |
| APPLICATION SITE COLDNESS                | 10076001 | 1 |
| APPLICATION SITE MOVEMENT IMPAIRMENT     | 10076020 | 1 |
| APPLICATION SITE NERVE DAMAGE            | 10076021 | 1 |
| APPLICATION SITE PLAQUE                  | 10076023 | 1 |
| SUSTAINED VIRAL RESPONSE                 | 10076041 | 1 |
| COMPUTED TOMOGRAPHIC ABSCESSOGRAM        | 10076045 | 1 |
| SPINAL CORD HAEMATOMA                    | 10076051 | 1 |
| CLINICAL TRIAL PARTICIPANT               | 10076055 | 1 |
| EYELID MYOCLONUS                         | 10076060 | 1 |
| INFUSION SITE JOINT SWELLING             | 10076078 | 1 |
| INFUSION SITE STREAKING                  | 10076086 | 1 |
| MEDICAL DEVICE SITE EROSION              | 10076104 | 1 |
| MEDICAL DEVICE SITE JOINT INFECTION      | 10076118 | 1 |
| MEDICAL DEVICE SITE JOINT PAIN           | 10076121 | 1 |
| MEDICAL DEVICE SITE JOINT SWELLING       | 10076123 | 1 |
| MEDICAL DEVICE SITE THROMBOSIS           | 10076145 | 1 |
| MEDICAL DEVICE SITE WARMTH               | 10076148 | 1 |
| VACCINATION SITE EROSION                 | 10076162 | 1 |



|                                                       |          |   |
|-------------------------------------------------------|----------|---|
| VACCINATION SITE ISCHAEMIA                            | 10076170 | 1 |
| VACCINATION SITE JOINT DISCOMFORT                     | 10076171 | 1 |
| VACCINATION SITE JOINT EFFUSION                       | 10076172 | 1 |
| VACCINATION SITE JOINT WARMTH                         | 10076179 | 1 |
| VACCINATION SITE LACERATION                           | 10076180 | 1 |
| VACCINATION SITE PHLEBITIS                            | 10076185 | 1 |
| VACCINATION SITE PHOTOSENSITIVITY REACTION            | 10076186 | 1 |
| VACCINATION SITE THROMBOSIS                           | 10076190 | 1 |
| INTESTINAL ANGIOEDEMA                                 | 10076229 | 1 |
| FLUID BALANCE ASSESSMENT                              | 10076266 | 1 |
| FLUID BALANCE NEGATIVE                                | 10076268 | 1 |
| SYNOVIAL BIOPSY ABNORMAL                              | 10076280 | 1 |
| CENTRAL NERVOUS SYSTEM LUPUS                          | 10076328 | 1 |
| STEATOHEPATITIS                                       | 10076331 | 1 |
| ENDOSCOPIC SWALLOWING EVALUATION                      | 10076372 | 1 |
| INCARCERATED INCISIONAL HERNIA                        | 10076387 | 1 |
| ORAL HYPERAESTHESIA                                   | 10076390 | 1 |
| CHRONIC PAPILLOMATOUS DERMATITIS                      | 10076454 | 1 |
| HYPERACTIVE PHARYNGEAL REFLEX                         | 10076460 | 1 |
| DOCUMENTED HYPERSENSITIVITY TO ADMINISTERED PRODUCT   | 10076470 | 1 |
| INABILITY TO AFFORD MEDICATION                        | 10076503 | 1 |
| COMPULSIVE CHEEK BITING                               | 10076510 | 1 |
| FUNGAL PHARYNGITIS                                    | 10076516 | 1 |
| SCHISTOCYTOSIS                                        | 10076534 | 1 |
| ERYTHEMATOTELANGIECTATIC ROSACEA                      | 10076536 | 1 |
| PAPULOPUSTULAR ROSACEA                                | 10076537 | 1 |
| PNEUMOCYSTIS TEST NEGATIVE                            | 10076540 | 1 |
| DERMAL FILLER OVERCORRECTION                          | 10076572 | 1 |
| LASER BRAIN ABLATION                                  | 10076587 | 1 |
| ULCERATIVE GASTRITIS                                  | 10076599 | 1 |
| MAST CELL DEGRANULATION PRESENT                       | 10076606 | 1 |
| PRESCRIPTION DRUG USED WITHOUT A PRESCRIPTION         | 10076639 | 1 |
| AUTOIMMUNE HYPOTHYROIDISM                             | 10076644 | 1 |
| DISSEMINATED VARICELLA ZOSTER VACCINE VIRUS INFECTION | 10076667 | 1 |
| MIGRAINE-TRIGGERED SEIZURE                            | 10076676 | 1 |
| PREMATURE BABY DEATH                                  | 10076700 | 1 |
| SUBARACHNOID HAEMATOMA                                | 10076701 | 1 |
| DEVELOPMENTAL REGRESSION                              | 10076709 | 1 |
| URETERIC COMPRESSION                                  | 10076715 | 1 |
| OPEN GLOBE INJURY                                     | 10076717 | 1 |
| AMEGAKARYOCYTIC THROMBOCYTOPENIA                      | 10076744 | 1 |
| ADAMTS13 INHIBITOR SCREEN ASSAY                       | 10076767 | 1 |
| POST-TRAUMATIC NEURALGIA                              | 10076781 | 1 |

|                                                |          |   |
|------------------------------------------------|----------|---|
| NASAL SINUS IRRIGATION                         | 10076904 | 1 |
| SEZARY CELL COUNT                              | 10076961 | 1 |
| CHA2DS2-VASC ANNUAL STROKE RISK HIGH           | 10076968 | 1 |
| SYSTOLIC ANTERIOR MOTION OF MITRAL VALVE       | 10076976 | 1 |
| JC POLYOMAVIRUS TEST NEGATIVE                  | 10076979 | 1 |
| BICKERSTAFF'S ENCEPHALITIS                     | 10076985 | 1 |
| NEUROENDOSCOPY                                 | 10076990 | 1 |
| HYPERTENSIVE CEREBROVASCULAR DISEASE           | 10077000 | 1 |
| POSTPARTUM THROMBOSIS                          | 10077022 | 1 |
| MASTICATORY PAIN                               | 10077030 | 1 |
| ILIAC ARTERY DISEASE                           | 10077115 | 1 |
| SYSTEMIC INFECTION                             | 10077116 | 1 |
| FAILED IN VITRO FERTILISATION                  | 10077207 | 1 |
| DEFIANT BEHAVIOUR                              | 10077244 | 1 |
| SURGICAL FIXATION OF RIB FRACTURE              | 10077270 | 1 |
| RAPID EYE MOVEMENT SLEEP BEHAVIOUR DISORDER    | 10077299 | 1 |
| ACUTE ON CHRONIC LIVER FAILURE                 | 10077305 | 1 |
| PELVIC FLOOR MUSCLE TRAINING                   | 10077309 | 1 |
| DOPAMINE TRANSPORTER SCINTIGRAPHY              | 10077317 | 1 |
| INFANTILE APNOEA                               | 10077321 | 1 |
| TICK PARALYSIS                                 | 10077336 | 1 |
| EPILEPTIC ENCEPHALOPATHY                       | 10077380 | 1 |
| SUICIDE THREAT                                 | 10077417 | 1 |
| HAEMORRHAGIC BREAST CYST                       | 10077443 | 1 |
| PORTAL SHUNT PROCEDURE                         | 10077479 | 1 |
| PSEUDOFOLLICULITIS                             | 10077520 | 1 |
| SOMATIC DYSFUNCTION                            | 10077554 | 1 |
| FOETAL MOVEMENT DISORDER                       | 10077576 | 1 |
| FOETAL ANAEMIA                                 | 10077577 | 1 |
| FOETAL GASTROINTESTINAL TRACT IMAGING ABNORMAL | 10077579 | 1 |
| FOETAL RENAL IMAGING ABNORMAL                  | 10077581 | 1 |
| BLOCH-SULZBERGER SYNDROME                      | 10077624 | 1 |
| ANTI FACTOR X ACTIVITY INCREASED               | 10077671 | 1 |
| PAO2/FIO2 RATIO                                | 10077710 | 1 |
| SPINAL FLATTENING                              | 10077756 | 1 |
| VASCULAR ACCESS SITE BRUISING                  | 10077767 | 1 |
| VASCULAR ACCESS PLACEMENT                      | 10077814 | 1 |
| QUADRANTANOPIA                                 | 10077820 | 1 |
| OESOPHAGEAL MUCOSAL TEAR                       | 10077822 | 1 |
| OMENTAL NECROSIS                               | 10077828 | 1 |
| VISCERAL VENOUS THROMBOSIS                     | 10077829 | 1 |
| VASCULAR ACCESS MALFUNCTION                    | 10077832 | 1 |
| LEFT-TO-RIGHT CARDIAC SHUNT                    | 10077834 | 1 |

|                                                    |          |   |
|----------------------------------------------------|----------|---|
| TOTAL COMPLEMENT ACTIVITY DECREASED                | 10077883 | 1 |
| CARDIAC STEATOSIS                                  | 10077905 | 1 |
| ARACHNOID WEB                                      | 10077932 | 1 |
| ABDOMINAL FAT APRON                                | 10077983 | 1 |
| NEUROSARCOIDOSIS                                   | 10078011 | 1 |
| INTERSPINOUS OSTEOARTHRITIS                        | 10078014 | 1 |
| SELECTIVE EATING DISORDER                          | 10078069 | 1 |
| GAMBLING DISORDER                                  | 10078070 | 1 |
| GENDER DYSPHORIA                                   | 10078075 | 1 |
| PSEUDOSTROKE                                       | 10078090 | 1 |
| THERAPY PARTIAL RESPONDER                          | 10078115 | 1 |
| HAEMOSIDERIN STAIN                                 | 10078154 | 1 |
| HIV-ASSOCIATED NEUROCOGNITIVE DISORDER             | 10078164 | 1 |
| PEAK NASAL INSPIRATORY FLOW TEST                   | 10078180 | 1 |
| ZIKA VIRUS INFECTION                               | 10078205 | 1 |
| LIGAMENTUM FLAVUM HYPERTROPHY                      | 10078213 | 1 |
| RENAL GRAFT INFECTION                              | 10078229 | 1 |
| DENTAL DYSAESTHESIA                                | 10078275 | 1 |
| FLAVIVIRUS TEST                                    | 10078302 | 1 |
| BIOPSY GALLBLADDER ABNORMAL                        | 10078309 | 1 |
| CEREBRAL MICROEMBOLISM                             | 10078311 | 1 |
| SYMMETRICAL DRUG-RELATED INTERTRIGINOUS AND FLEXUR | 10078325 | 1 |
| CHOLELITHOTRIPSY                                   | 10078327 | 1 |
| NIPPLE ENLARGEMENT                                 | 10078337 | 1 |
| RISK OF FUTURE PREGNANCY MISCARRIAGE               | 10078342 | 1 |
| B-CELL DEPLETION THERAPY                           | 10078393 | 1 |
| BENIGN ENLARGEMENT OF THE SUBARACHNOID SPACES      | 10078477 | 1 |
| DISCONTINUED PRODUCT ADMINISTERED                  | 10078505 | 1 |
| B-LYMPHOCYTE COUNT ABNORMAL                        | 10078589 | 1 |
| CD19 LYMPHOCYTE COUNT ABNORMAL                     | 10078591 | 1 |
| BACTERIAL ABDOMINAL INFECTION                      | 10078660 | 1 |
| VOCAL CORD AUGMENTATION                            | 10078752 | 1 |
| EXPOSURE VIA UNKNOWN ROUTE                         | 10078762 | 1 |
| MYSOPHOBIA                                         | 10078769 | 1 |
| TUMOUR INFLAMMATION                                | 10078786 | 1 |
| PERINEPHRIC OEDEMA                                 | 10078818 | 1 |
| AMNIOTIC MEMBRANE RUPTURE TEST NEGATIVE            | 10078835 | 1 |
| AMNIOTIC MEMBRANE RUPTURE TEST                     | 10078836 | 1 |
| HAEMORRHAGIC VARICELLA SYNDROME                    | 10078873 | 1 |
| ARTIFICIAL BLOOD VESSEL OCCLUSION                  | 10078895 | 1 |
| SWOLLEN JOINT COUNT                                | 10078912 | 1 |
| SUPINE HYPERTENSION                                | 10078932 | 1 |
| EXPOSURE KERATITIS                                 | 10078951 | 1 |

|                                                  |          |   |
|--------------------------------------------------|----------|---|
| BREAST PROLIFERATIVE CHANGES                     | 10078952 | 1 |
| IMMUNE-MEDIATED NEUROPATHY                       | 10078963 | 1 |
| INVESTIGATION NONCOMPLIANCE                      | 10078982 | 1 |
| PRODUCT SUBSTITUTION ERROR                       | 10078984 | 1 |
| PRIMARY HEADACHE ASSOCIATED WITH SEXUAL ACTIVITY | 10079056 | 1 |
| AUTOIMMUNE PERICARDITIS                          | 10079058 | 1 |
| PEDANTIC SPEECH                                  | 10079059 | 1 |
| OROPHARYNGEAL DISCOLOURATION                     | 10079096 | 1 |
| RESPIRATORY SINUS ARRHYTHMIA MAGNITUDE ABNORMAL  | 10079117 | 1 |
| TRANSVALVULAR PRESSURE GRADIENT ABNORMAL         | 10079127 | 1 |
| SEGMENTAL DIVERTICULAR COLITIS                   | 10079166 | 1 |
| MEDICAL DEVICE SITE BURN                         | 10079169 | 1 |
| MYOPIA CORRECTION                                | 10079195 | 1 |
| SHORT INTERPREGNANCY INTERVAL                    | 10079272 | 1 |
| CSF EOSINOPHIL COUNT                             | 10079290 | 1 |
| URINE ORGANIC ACID TEST                          | 10079357 | 1 |
| ACUTE MACULAR OUTER RETINOPATHY                  | 10079367 | 1 |
| EPSTEIN BARR VIRUS POSITIVE MUCOCUTANEOUS ULCER  | 10079386 | 1 |
| ELECTROGASTROGRAM                                | 10079538 | 1 |
| TENDON DISLOCATION                               | 10079547 | 1 |
| MESENTERIC ARTERY ANEURYSM                       | 10079556 | 1 |
| ORAL DYSPLASIA                                   | 10079559 | 1 |
| THYMIC CYST                                      | 10079570 | 1 |
| PERICARDIAL MASS                                 | 10079578 | 1 |
| CARDIAC VALVE THICKENING                         | 10079587 | 1 |
| WIG WEARER                                       | 10079603 | 1 |
| SUBCUTANEOUS DRUG ABSORPTION IMPAIRED            | 10079629 | 1 |
| LUPUS MYOSITIS                                   | 10079642 | 1 |
| FRACTIONAL EXHALED NITRIC OXIDE                  | 10079700 | 1 |
| DIFFUSION-WEIGHTED BRAIN MRI                     | 10079718 | 1 |
| ATRIAL APPENDAGE CLOSURE                         | 10079735 | 1 |
| EXPOSURE VIA TRANSPLANT                          | 10079736 | 1 |
| ATYPICAL HAEMOLYTIC URAEMIC SYNDROME             | 10079840 | 1 |
| FOREIGN BODY IN GASTROINTESTINAL TRACT           | 10079846 | 1 |
| TRICHODYNIA                                      | 10079852 | 1 |
| SUBCHONDRAL INSUFFICIENCY FRACTURE               | 10079864 | 1 |
| PNEUMONIA ACINETOBACTER                          | 10079866 | 1 |
| PNEUMONIA SERRATIA                               | 10079868 | 1 |
| SUPERIOR SEMICIRCULAR CANAL DEHISCENCE           | 10079888 | 1 |
| CRYPTITIS                                        | 10079893 | 1 |
| BENZODIAZEPINE DRUG LEVEL INCREASED              | 10079903 | 1 |
| INTRACARDIAC PRESSURE INCREASED                  | 10079904 | 1 |
| MINIMAL RESIDUAL DISEASE                         | 10079987 | 1 |

|                                                  |          |   |
|--------------------------------------------------|----------|---|
| URINARY BLADDER SUSPENSION                       | 10079992 | 1 |
| PRODUCT APPEARANCE CONFUSION                     | 10080000 | 1 |
| OEDEMA BLISTER                                   | 10080039 | 1 |
| EUGLYCAEMIC DIABETIC KETOACIDOSIS                | 10080061 | 1 |
| PROSTHETIC CARDIAC VALVE STENOSIS                | 10080073 | 1 |
| PATERNAL EXPOSURE BEFORE PREGNANCY               | 10080093 | 1 |
| SITOPHOBIA                                       | 10080170 | 1 |
| ARTERIAL TORTUOSITY SYNDROME                     | 10080250 | 1 |
| ARTERIAL DOLICHOECTASIA                          | 10080307 | 1 |
| DEVICE DISPENSING ERROR                          | 10080357 | 1 |
| DUPLICATE THERAPY ERROR                          | 10080422 | 1 |
| ANIMAL ATTACK                                    | 10080456 | 1 |
| VIBRIO VULNIFICUS INFECTION                      | 10080490 | 1 |
| REMOVAL OF EXTERNAL FIXATION                     | 10080546 | 1 |
| HYPERTHERMIC CHEMOTHERAPY                        | 10080557 | 1 |
| POST PROCEDURAL FEVER                            | 10080559 | 1 |
| GASTROINTESTINAL VASCULAR MALFORMATION HAEMORRHA | 10080561 | 1 |
| HISTAMINE RELEASE TEST                           | 10080590 | 1 |
| GUT FERMENTATION SYNDROME                        | 10080594 | 1 |
| RENAL ARTERY RESTENOSIS                          | 10080626 | 1 |
| IMPLANTABLE CARDIAC MONITOR REMOVAL              | 10080633 | 1 |
| AUTOIMMUNE LUNG DISEASE                          | 10080701 | 1 |
| STOMA CREATION                                   | 10080707 | 1 |
| UTERINE CERVIX HYPERPLASIA                       | 10080728 | 1 |
| JC POLYOMAVIRUS TEST                             | 10080768 | 1 |
| FINKELSTEIN TEST                                 | 10080810 | 1 |
| AGGLUTINATION TEST                               | 10080821 | 1 |
| SNAPPING HIP SYNDROME                            | 10080832 | 1 |
| TARTRATE-RESISTANT ACID PHOSPHATASE INCREASED    | 10080834 | 1 |
| MIXED ANXIETY AND DEPRESSIVE DISORDER            | 10080836 | 1 |
| ENTERIC NEUROPATHY                               | 10080846 | 1 |
| ISOCITRATE DEHYDROGENASE GENE MUTATION           | 10080848 | 1 |
| HTLV-1 TEST                                      | 10080855 | 1 |
| ADENOSINE DEAMINASE                              | 10080858 | 1 |
| VISUOSPATIAL DEFICIT                             | 10080880 | 1 |
| HYPERGLYCINAEMIA                                 | 10080883 | 1 |
| BRAIN STENT INSERTION                            | 10080887 | 1 |
| PROCEDURAL SHOCK                                 | 10080894 | 1 |
| TISSUE INFILTRATION                              | 10080901 | 1 |
| ASSISTED REPRODUCTIVE TECHNOLOGY                 | 10080951 | 1 |
| PARANEOPLASTIC MYELOPATHY                        | 10080965 | 1 |
| SINGLE COMPONENT OF A TWO-COMPONENT PRODUCT ADM  | 10080977 | 1 |
| CUTIS VERTICIS GYRATA                            | 10080996 | 1 |

|                                          |          |   |
|------------------------------------------|----------|---|
| OBESITY CARDIOMYOPATHY                   | 10081007 | 1 |
| TRANSILLUMINATION                        | 10081057 | 1 |
| PERIPHERAL ARTERY HAEMATOMA              | 10081077 | 1 |
| AUTOIMMUNE EYE DISORDER                  | 10081123 | 1 |
| DIGESTIVE ENZYME DECREASED               | 10081158 | 1 |
| DIGESTIVE ENZYME NORMAL                  | 10081160 | 1 |
| EYE DROP INSTILLATION                    | 10081161 | 1 |
| EPILEPSY WITH MYOCLONIC-ATONIC SEIZURES  | 10081179 | 1 |
| PLATELET RICH PLASMA THERAPY             | 10081187 | 1 |
| JOINT POSITION SENSE DECREASED           | 10081223 | 1 |
| PIK3CA RELATED OVERGROWTH SPECTRUM       | 10081236 | 1 |
| PITUITARY GLAND OPERATION                | 10081273 | 1 |
| ALCOHOL TEST POSITIVE                    | 10081297 | 1 |
| MAISONNEUVE FRACTURE                     | 10081343 | 1 |
| EAR AND HEARING DISORDER PROPHYLAXIS     | 10081384 | 1 |
| SPINAL SEGMENTAL DYSFUNCTION             | 10081395 | 1 |
| SPLENIC FLEXURE MOBILISATION             | 10081418 | 1 |
| TRACHEAL ASPIRATION PROCEDURE            | 10081462 | 1 |
| SUSPECTED PRODUCT QUALITY ISSUE          | 10081480 | 1 |
| ACUTE MYELOID LEUKAEMIA REFRACTORY       | 10081513 | 1 |
| NATURAL KILLER CELL ACTIVITY TEST        | 10081529 | 1 |
| DIABETIC WOUND                           | 10081558 | 1 |
| INTERCEPTED PRODUCT ADMINISTRATION ERROR | 10081573 | 1 |
| PRODUCT MONITORING ERROR                 | 10081575 | 1 |
| OTOLITHIASIS                             | 10081585 | 1 |
| ELECTROCARDIOGRAM S1-S2-S3 PATTERN       | 10081593 | 1 |
| SEIZURE PROPHYLAXIS                      | 10081601 | 1 |
| SPINAL SYNOVIAL CYST                     | 10081613 | 1 |
| DUROTOMY PROCEDURE                       | 10081615 | 1 |
| SERPIGINOUS CHOROIDITIS                  | 10081652 | 1 |
| GENITAL DISCOLOURATION                   | 10081697 | 1 |
| INTERCEPTED PRODUCT PRESCRIBING ERROR    | 10081743 | 1 |
| CONTRAINDICATED PRODUCT PRESCRIBED       | 10081744 | 1 |
| MURPHY'S SIGN TEST                       | 10081748 | 1 |
| CATECHOLAMINE CRISIS                     | 10081751 | 1 |
| STEROID DIABETES                         | 10081755 | 1 |
| ABSENCE OF IMMEDIATE TREATMENT RESPONSE  | 10081766 | 1 |
| CARDIAC DEVICE REPROGRAMMING             | 10081886 | 1 |
| CEREBRAL ARTERY STENT INSERTION          | 10081893 | 1 |
| CHECKPOINT KINASE 2 GENE MUTATION        | 10081927 | 1 |
| LARYNGEAL STROBOSCOPY                    | 10081946 | 1 |
| PERNIO-LIKE ERYTHEMA                     | 10081993 | 1 |
| PLACENTAL CALCIFICATION                  | 10082008 | 1 |

|                                            |          |   |
|--------------------------------------------|----------|---|
| RETINOSCOPY                                | 10082015 | 1 |
| INCISION SITE IMPAIRED HEALING             | 10082028 | 1 |
| PORTAL VEIN EMBOLISM                       | 10082030 | 1 |
| NEONATAL SEIZURE                           | 10082067 | 1 |
| UMBILICAL CORD BLOOD PH                    | 10082071 | 1 |
| PLEURAL MASS                               | 10082101 | 1 |
| GASTRIC ELECTRICAL STIMULATION             | 10082102 | 1 |
| THERAPEUTIC PRODUCT EFFECT INCREASED       | 10082203 | 1 |
| ENZYME ACTIVITY ASSAY                      | 10082222 | 1 |
| POSTPARTUM ANXIETY                         | 10082233 | 1 |
| ANTI-RNA POLYMERASE III ANTIBODY POSITIVE  | 10082283 | 1 |
| EXPOSURE TO TOBACCO                        | 10082288 | 1 |
| URTICARIAL DERMATITIS                      | 10082290 | 1 |
| DRUG TITRATION                             | 10082292 | 1 |
| DORSAL RAMUS SYNDROME                      | 10082295 | 1 |
| ENDOCERVICAL MUCOSAL THICKENING            | 10082304 | 1 |
| LEFT ATRIAL VOLUME INCREASED               | 10082369 | 1 |
| AMPLIFIED MUSCULOSKELETAL PAIN SYNDROME    | 10082375 | 1 |
| ABERRANT AORTIC ARCH                       | 10082380 | 1 |
| PROGRESSIVE MACULAR HYPOMELANOSIS          | 10082386 | 1 |
| NON-SCARRING ALOPECIA                      | 10082395 | 1 |
| ENTERORRHAPHY                              | 10082396 | 1 |
| INCREASED LIVER STIFFNESS                  | 10082444 | 1 |
| PROTHROMBIN FRAGMENT 1.2                   | 10082446 | 1 |
| VERTEBROBASILAR STROKE                     | 10082484 | 1 |
| HYPERRESPONSIVE TO STIMULI                 | 10082489 | 1 |
| PANCREATIC CYST DRAINAGE                   | 10082531 | 1 |
| CAPNOGRAM                                  | 10082532 | 1 |
| PULMONARY IMAGING PROCEDURE NORMAL         | 10082581 | 1 |
| STRONGYLOIDES TEST POSITIVE                | 10082598 | 1 |
| ABDOMINAL WALL OEDEMA                      | 10082609 | 1 |
| POSITRON EMISSION TOMOGRAM BREAST ABNORMAL | 10082622 | 1 |
| DECREASED GAIT VELOCITY                    | 10082636 | 1 |
| BIOPSY NASOPHARYNX ABNORMAL                | 10082658 | 1 |
| ANAL BLISTER                               | 10082677 | 1 |
| ADMINISTRATION SITE ACNE                   | 10082766 | 1 |
| VAGINAL DILATION PROCEDURE                 | 10082791 | 1 |
| VERTEBRAL END PLATE INFLAMMATION           | 10082831 | 1 |
| COMPUTED TOMOGRAPHIC GASTROGRAPHY          | 10082840 | 1 |
| NASAL POTENTIAL DIFFERENCE TEST            | 10082865 | 1 |
| HABIT COUGH                                | 10082913 | 1 |
| VESTIBULAR PAROXYSMIA                      | 10082929 | 1 |
| COMPUTERISED TOMOGRAM PANCREAS             | 10082934 | 1 |

|                                                   |          |   |
|---------------------------------------------------|----------|---|
| STEROID DEPENDENCE                                | 10082986 | 1 |
| INJECTION SITE PANNICULITIS                       | 10083040 | 1 |
| MACROPHAGE INFLAMMATORY PROTEIN-1 ALPHA INCREASED | 10083049 | 1 |
| IMMUNE-MEDIATED ENCEPHALITIS                      | 10083074 | 1 |
| LIPOPROTEIN-ASSOCIATED PHOSPHOLIPASE A2           | 10083082 | 1 |
| SUBDURAL ABSCESS                                  | 10083083 | 1 |
| LUNG DIFFUSION TEST DECREASED                     | 10083094 | 1 |
| LUNG DIFFUSION DISORDER                           | 10083095 | 1 |
| ILIAC VEIN STENOSIS                               | 10083102 | 1 |
| PERIPHERAL VEIN STENOSIS                          | 10083104 | 1 |
| AURICULAR CHONDRITIS                              | 10083111 | 1 |
| MAGNETIC RESONANCE IMAGING PANCREAS               | 10083121 | 1 |
| DEVICE USE CONFUSION                              | 10083151 | 1 |
| PHARYNGEAL CONTUSION                              | 10083176 | 1 |
| PLACENTAL CYST                                    | 10083196 | 1 |
| ELECTROCARDIOGRAM P WAVE                          | 10083198 | 1 |
| NASOPHARYNGEAL TUMOUR                             | 10083253 | 1 |
| BRONCHIOLITIS OBLITERANS SYNDROME                 | 10083303 | 1 |
| GENERALISED ONSET NON-MOTOR SEIZURE               | 10083376 | 1 |
| INTESTINAL MUCOSAL TEAR                           | 10083542 | 1 |
| FOLLICULAR CYSTITIS                               | 10083549 | 1 |
| ORBITAL HAEMATOMA                                 | 10083565 | 1 |
| AUTOIMMUNE CHOLANGITIS                            | 10083636 | 1 |
| HYPOTENSIVE CRISIS                                | 10083659 | 1 |
| CEREBRAL MICROINFARCTION                          | 10083668 | 1 |
| SPLENIC ARTERY EMBOLISATION                       | 10083795 | 1 |
| INTERNAL DEVICE EXPOSED                           | 10083797 | 1 |
| HEPATIC PERFUSION DISORDER                        | 10083840 | 1 |
| ABLEPHARON MACROSTOMIA SYNDROME                   | 10083860 | 1 |
| PARADOXICAL PSORIASIS                             | 10083929 | 1 |
| OCCUPATIONAL EXPOSURE TO SUNLIGHT                 | 10083930 | 1 |
| DIALYSIS HYPOTENSION                              | 10084012 | 1 |
| MENINGITIS ESCHERICHIA                            | 10084029 | 1 |
| EPIGLOTTIC CANCER                                 | 10084056 | 1 |
| VASCULAR GRAFT INFECTION                          | 10084057 | 1 |
| EMBOLIC CEREBELLAR INFARCTION                     | 10084072 | 1 |
| ATRIOVENTRICULAR NODE DYSFUNCTION                 | 10084085 | 1 |
| AST TO PLATELET RATIO INDEX INCREASED             | 10084175 | 1 |
| FACIOBRACHIAL DYSTONIC SEIZURE                    | 10084187 | 1 |
| PLATELET STORAGE POOL DEFICIENCY                  | 10084190 | 1 |
| POOR MILK EJECTION REFLEX                         | 10084213 | 1 |
| VERTEBRAL ARTERY ARTERIOSCLEROSIS                 | 10084347 | 1 |
| GARDNERELLA TEST                                  | 10084361 | 1 |



|                                                     |          |   |
|-----------------------------------------------------|----------|---|
| SULPHUR DIOXIDE TEST                                | 10084384 | 1 |
| OCCUPATIONAL EXPOSURE TO COMMUNICABLE DISEASE       | 10084393 | 1 |
| DISSEMINATED VARICELLA                              | 10084395 | 1 |
| INTENTIONAL PRODUCT MISUSE TO CHILD                 | 10084403 | 1 |
| MERS-COV TEST                                       | 10084443 | 1 |
| SARS-COV-2 CARRIER                                  | 10084461 | 1 |
| TONGUE INDURATION                                   | 10084548 | 1 |
| GALLBLADDER MASS                                    | 10084568 | 1 |
| STOOL DNA TEST NEGATIVE                             | 10084583 | 1 |
| SRSF2 GENE MUTATION                                 | 10084608 | 1 |
| ASXL1 GENE MUTATION                                 | 10084611 | 1 |
| BRONCHOSCOPIC LUNG VOLUME REDUCTION                 | 10084618 | 1 |
| CHRONIC RHINOSINUSITIS WITHOUT NASAL POLYPS         | 10084742 | 1 |
| ARTERIOVENOUS FISTULA SITE PSEUDOANEURYSM           | 10084750 | 1 |
| REACTIVE CAPILLARY ENDOTHELIAL PROLIFERATION        | 10084761 | 1 |
| VOCAL CORD ERYTHEMA                                 | 10084781 | 1 |
| VOCAL CORD BOWING                                   | 10084782 | 1 |
| OTOENDOSCOPY                                        | 10084853 | 1 |
| DEPRESSION RATING SCALE SCORE                       | 10084952 | 1 |
| URINARY OCCULT BLOOD                                | 10084960 | 1 |
| VACCINE ASSOCIATED ENHANCED RESPIRATORY DISEASE     | 10085001 | 1 |
| ENDOBONCHIAL ULTRASOUND TRANSBRONCHIAL NEEDLE AS    | 10085040 | 1 |
| PARANASAL SINUS MASS                                | 10085055 | 1 |
| HCOV-OC43 INFECTION                                 | 10085077 | 1 |
| RECURRENT SUBAREOLAR BREAST ABSCESS                 | 10085084 | 1 |
| TREATMENT DELAYED                                   | 10085087 | 1 |
| SEROMA DRAINAGE                                     | 10085114 | 1 |
| FOLLICULAR LYMPHOMA STAGE I                         | 10085123 | 1 |
| NEUTROPHIL/LYMPHOCYTE RATIO                         | 10085124 | 1 |
| OPTOMETRIC THERAPY                                  | 10085142 | 1 |
| DENTAL IMPLANT REMOVAL                              | 10085172 | 1 |
| CONFIRMED E-CIGARETTE OR VAPING PRODUCT USE ASSOCIA | 10085189 | 1 |
| FOLLICULAR ECZEMA                                   | 10085198 | 1 |
| THYMOMA BENIGN                                      | 10085199 | 1 |
| LUMBAR ARTERY EMBOLISATION                          | 10085311 | 1 |
| BRONCHIAL NEOPLASM                                  | 10052245 | 1 |
| SALIVARY GLAND CYST                                 | 10052248 | 1 |
| CATHETER SITE PAIN                                  | 10052268 | 1 |
| DYSTROPHIC CALCIFICATION                            | 10052273 | 1 |
| HIGH-PITCHED CRYING                                 | 10052286 | 1 |
| KERATOLYSIS EXFOLIATIVA ACQUIRED                    | 10052291 | 1 |
| VAGINAL CELLULITIS                                  | 10052301 | 1 |
| NASAL FLARING                                       | 10052319 | 1 |

|                                          |          |   |
|------------------------------------------|----------|---|
| PRIMARY ADRENAL INSUFFICIENCY            | 10052381 | 1 |
| BILIARY CYST                             | 10052384 | 1 |
| GASTRIC HYPOMOTILITY                     | 10052405 | 1 |
| MYOFASCITIS                              | 10052443 | 1 |
| OCULAR NEOPLASM                          | 10052448 | 1 |
| FACTOR X DEFICIENCY                      | 10052474 | 1 |
| GASTRIC VOLVULUS                         | 10052541 | 1 |
| OTITIS EXTERNA FUNGAL                    | 10052557 | 1 |
| URTICARIA PRESSURE                       | 10052572 | 1 |
| SKIN COSMETIC PROCEDURE                  | 10052608 | 1 |
| ALLERGIC BRONCHITIS                      | 10052613 | 1 |
| POSTOPERATIVE CARE                       | 10052617 | 1 |
| CYSTIC FIBROSIS CARRIER                  | 10052656 | 1 |
| BIOPSY BLOOD VESSEL                      | 10052663 | 1 |
| VASCULAR SHUNT                           | 10052664 | 1 |
| VALVULOPLASTY CARDIAC                    | 10052681 | 1 |
| UROLOGICAL EXAMINATION                   | 10052684 | 1 |
| TRICUSPID VALVE REPAIR                   | 10052690 | 1 |
| TRANSURETHRAL BLADDER RESECTION          | 10052693 | 1 |
| TRACHEOSCOPY                             | 10052694 | 1 |
| ADENOCARCINOMA PANCREAS                  | 10052747 | 1 |
| FIBROUS CORTICAL DEFECT                  | 10052753 | 1 |
| BODY DYSMORPHIC DISORDER                 | 10052793 | 1 |
| DRUG TOLERANCE INCREASED                 | 10052806 | 1 |
| PERIRECTAL ABSCESS                       | 10052814 | 1 |
| EOSINOPHILIC PUSTULAR FOLLICULITIS       | 10052834 | 1 |
| PRENATAL CARE                            | 10052859 | 1 |
| X-RAY THERAPY TO BLOOD                   | 10052869 | 1 |
| MURPHY'S SIGN POSITIVE                   | 10052900 | 1 |
| CARDIAC SEPTAL DEFECT REPAIR             | 10052910 | 1 |
| SPINAL SUPPORT                           | 10052920 | 1 |
| CLAMPING OF BLOOD VESSEL                 | 10052928 | 1 |
| ARTERIAL THERAPEUTIC PROCEDURE           | 10052949 | 1 |
| DRAIN OF CEREBRAL SUBDURAL SPACE         | 10052957 | 1 |
| IMPLANTABLE DEFIBRILLATOR REMOVAL        | 10052958 | 1 |
| INTERMITTENT POSITIVE PRESSURE BREATHING | 10052959 | 1 |
| VENOUS REPAIR                            | 10052964 | 1 |
| MUSCLE ELECTROSTIMULATION THERAPY        | 10052969 | 1 |
| DRUG WITHDRAWAL MAINTENANCE THERAPY      | 10052970 | 1 |
| LIP OPERATION                            | 10052977 | 1 |
| JOINT IRRIGATION                         | 10052987 | 1 |
| ILEOCOLOSTOMY                            | 10052997 | 1 |
| HYSTEROSALPINGECTOMY                     | 10052998 | 1 |

|                                               |          |   |
|-----------------------------------------------|----------|---|
| BIOPSY FOETAL                                 | 10053139 | 1 |
| INDUCED ABORTION FAILED                       | 10053191 | 1 |
| EYELID BLEEDING                               | 10053196 | 1 |
| LEUKOERYTHROBLASTIC ANAEMIA                   | 10053199 | 1 |
| PARALYTIC DISABILITY                          | 10053201 | 1 |
| WOUND DECOMPOSITION                           | 10053208 | 1 |
| MIXED INCONTINENCE                            | 10053236 | 1 |
| BIOPSY SMALL INTESTINE ABNORMAL               | 10053283 | 1 |
| OPHTHALMIC FLUID DRAINAGE                     | 10053299 | 1 |
| ABDOMINAL EXPLORATION                         | 10053309 | 1 |
| PSYCHIATRIC EVALUATION ABNORMAL               | 10053338 | 1 |
| ROUTINE HEALTH MAINTENANCE                    | 10053339 | 1 |
| ENDOTHELIN ABNORMAL                           | 10053403 | 1 |
| BRAIN NATRIURETIC PEPTIDE ABNORMAL            | 10053408 | 1 |
| APPLICATION SITE SWELLING                     | 10053424 | 1 |
| CARDIAC VENTRICULOGRAM ABNORMAL               | 10053447 | 1 |
| ANTACID THERAPY                               | 10053458 | 1 |
| ANTIINFLAMMATORY THERAPY                      | 10053467 | 1 |
| PHYSICAL BREAST EXAMINATION NORMAL            | 10053479 | 1 |
| CARDIAC VENTRICULOGRAM LEFT                   | 10053497 | 1 |
| CARDIAC VENTRICULOGRAM LEFT ABNORMAL          | 10053499 | 1 |
| SCAN BONE MARROW NORMAL                       | 10053503 | 1 |
| INFUSION SITE SWELLING                        | 10053505 | 1 |
| CLEFT UVULA                                   | 10053507 | 1 |
| URINE PROTEIN/CREATININE RATIO DECREASED      | 10053536 | 1 |
| URINE PROTEIN/CREATININE RATIO ABNORMAL       | 10053539 | 1 |
| URINE ALBUMIN/CREATININE RATIO NORMAL         | 10053543 | 1 |
| VITH NERVE DISORDER                           | 10053646 | 1 |
| PROSTHESIS USER                               | 10053669 | 1 |
| CARDIOVASCULAR AUTONOMIC FUNCTION TEST NORMAL | 10053690 | 1 |
| EXCESSIVE OCULAR CONVERGENCE                  | 10053693 | 1 |
| PULMONARY FUNCTION CHALLENGE TEST             | 10053709 | 1 |
| PULMONARY FUNCTION CHALLENGE TEST ABNORMAL    | 10053711 | 1 |
| WOUND NECROSIS                                | 10053716 | 1 |
| FIBROUS HISTIOCYTOMA                          | 10053717 | 1 |
| BRAIN TUMOUR OPERATION                        | 10053749 | 1 |
| ABDOMINOPLASTY                                | 10053774 | 1 |
| BLOOD TESTOSTERONE FREE NORMAL                | 10053788 | 1 |
| BLOOD ERYTHROPOIETIN INCREASED                | 10053795 | 1 |
| BLOOD ANDROSTENEDIONE INCREASED               | 10053808 | 1 |
| BLOOD 1,25-DIHYDROXYCHOLECALCIFEROL INCREASED | 10053810 | 1 |
| SNEDDON'S SYNDROME                            | 10053841 | 1 |
| MELAS SYNDROME                                | 10053872 | 1 |

|                                          |          |   |
|------------------------------------------|----------|---|
| SEPSIS SYNDROME                          | 10053879 | 1 |
| TRISOMY 18                               | 10053884 | 1 |
| CAROTID PULSE INCREASED                  | 10053898 | 1 |
| POPLITEAL PULSE DECREASED                | 10053905 | 1 |
| POPLITEAL PULSE INCREASED                | 10053906 | 1 |
| RED CELL DISTRIBUTION WIDTH ABNORMAL     | 10053923 | 1 |
| CAROTID PULSE                            | 10053926 | 1 |
| THROMBIN-ANTITHROMBIN III COMPLEX        | 10053970 | 1 |
| THROMBIN-ANTITHROMBIN III COMPLEX NORMAL | 10053971 | 1 |
| IMPLANT SITE HAEMORRHAGE                 | 10053995 | 1 |
| THYROGLOBULIN INCREASED                  | 10054010 | 1 |
| THYROGLOBULIN PRESENT                    | 10054024 | 1 |
| PROGESTERONE RECEPTOR ASSAY              | 10054056 | 1 |
| PROGESTERONE RECEPTOR ASSAY NEGATIVE     | 10054058 | 1 |
| VESSEL PUNCTURE SITE HAEMORRHAGE         | 10054092 | 1 |
| MICROCOCCUS INFECTION                    | 10054120 | 1 |
| POST PROCEDURAL DISCOMFORT               | 10054126 | 1 |
| HEPATITIS B IMMUNISATION                 | 10054130 | 1 |
| STENOTROPHOMONAS INFECTION               | 10054138 | 1 |
| SALIVA ALCOHOL TEST POSITIVE             | 10054176 | 1 |
| SMALL INTESTINE CARCINOMA                | 10054184 | 1 |
| GAIT DEVIATION                           | 10054197 | 1 |
| IIIRD NERVE PARESIS                      | 10054202 | 1 |
| AEROMONAS INFECTION                      | 10054205 | 1 |
| ALCOHOL REHABILITATION                   | 10054206 | 1 |
| ENTEROCOCCAL SEPSIS                      | 10054221 | 1 |
| SCLERAL THINNING                         | 10054763 | 1 |
| DECREASED BRONCHIAL SECRETION            | 10054764 | 1 |
| ANTERIOR CHAMBER INFLAMMATION            | 10054765 | 1 |
| RETROPLACENTAL HAEMATOMA                 | 10054798 | 1 |
| INJECTION SITE CALCIFICATION             | 10054812 | 1 |
| BLOOD PHOSPHORUS ABNORMAL                | 10054823 | 1 |
| RECTAL LESION                            | 10054828 | 1 |
| EXTERNAL AUDITORY CANAL ATRESIA          | 10054875 | 1 |
| MENISCUS OPERATION                       | 10054948 | 1 |
| PULMONARY HAEMATOMA                      | 10054991 | 1 |
| CERVIX CERCLAGE PROCEDURE                | 10054992 | 1 |
| BROMHIDROSIS                             | 10055000 | 1 |
| EAR NEOPLASM                             | 10055016 | 1 |
| GINGIVAL CYST                            | 10055018 | 1 |
| ANAL INJURY                              | 10055023 | 1 |
| UMBILICAL ERYTHEMA                       | 10055029 | 1 |
| ERYTHEMA DYSCHROMICUM PERSTANS           | 10055035 | 1 |

|                                             |          |   |
|---------------------------------------------|----------|---|
| RECTAL CANCER METASTATIC                    | 10055097 | 1 |
| BONE CANCER METASTATIC                      | 10055101 | 1 |
| PITUITARY CANCER METASTATIC                 | 10055106 | 1 |
| TONGUE CANCER METASTATIC                    | 10055109 | 1 |
| ARTERIOVENOUS FISTULA SITE COMPLICATION     | 10055122 | 1 |
| ARTERIOVENOUS FISTULA SITE HAEMORRHAGE      | 10055123 | 1 |
| AUTOIMMUNE NEUTROPENIA                      | 10055128 | 1 |
| CATHETER SITE HAEMATOMA                     | 10055662 | 1 |
| CORNEAL NEOVASCULARISATION                  | 10055665 | 1 |
| NECROTISING ULCERATIVE GINGIVOSTOMATITIS    | 10055670 | 1 |
| PARKINSONIAN GAIT                           | 10056242 | 1 |
| EOSINOPHILIC CYSTITIS                       | 10056246 | 1 |
| ANTICONVULSANT DRUG LEVEL THERAPEUTIC       | 10056282 | 1 |
| CD8 LYMPHOCYTES DECREASED                   | 10056283 | 1 |
| STERNAL INJURY                              | 10056287 | 1 |
| GLUTATHIONE DECREASED                       | 10056290 | 1 |
| NEOPLASM OF THYMUS                          | 10056296 | 1 |
| ANTICONVULSANT DRUG LEVEL BELOW THERAPEUTIC | 10056327 | 1 |
| ALCOHOLIC SEIZURE                           | 10056347 | 1 |
| REFUSAL OF TREATMENT BY RELATIVE            | 10056406 | 1 |
| BLADDER NECK OPERATION                      | 10056416 | 1 |
| ARTERIAL BYPASS OPERATION                   | 10056418 | 1 |
| SWAN GANZ CATHETER PLACEMENT                | 10056442 | 1 |
| PERICARDIAL DRAINAGE TEST NORMAL            | 10056463 | 1 |
| CORONARY ARTERY RESTENOSIS                  | 10056489 | 1 |
| BENIGN BILIARY NEOPLASM                     | 10056514 | 1 |
| PSOAS ABSCESS                               | 10056517 | 1 |
| CATHETER SITE INFECTION                     | 10056520 | 1 |
| PERITONEAL CANDIDIASIS                      | 10056562 | 1 |
| LIPECTOMY                                   | 10056588 | 1 |
| APOLIPOPROTEIN                              | 10056630 | 1 |
| MIDDLE LOBE SYNDROME                        | 10056652 | 1 |
| RETROPERITONEAL NEOPLASM                    | 10056664 | 1 |
| PHOBIA OF DRIVING                           | 10056676 | 1 |
| MENISCUS REMOVAL                            | 10056722 | 1 |
| GASTROINTESTINAL ULCER HAEMORRHAGE          | 10056743 | 1 |
| EGOBRONCHOPHONY                             | 10056744 | 1 |
| BODY HEIGHT ABNORMAL                        | 10056822 | 1 |
| RECTAL EXAMINATION NORMAL                   | 10056823 | 1 |
| OTOSCOPY NORMAL                             | 10056825 | 1 |
| OTOSCOPY ABNORMAL                           | 10056826 | 1 |
| UROLOGICAL EXAMINATION ABNORMAL             | 10056842 | 1 |
| MEDICAL OBSERVATION NORMAL                  | 10056843 | 1 |

|                                                |          |   |
|------------------------------------------------|----------|---|
| EMERGENCY CARE EXAMINATION NORMAL              | 10056845 | 1 |
| APGAR SCORE NORMAL                             | 10056849 | 1 |
| FACIAL WASTING                                 | 10056866 | 1 |
| ACROCHORDON EXCISION                           | 10056875 | 1 |
| NEAR DROWNING                                  | 10056905 | 1 |
| NECROBIOSIS LIPOIDICA DIABETICORUM             | 10056969 | 1 |
| OESOPHAGEAL MASS                               | 10057003 | 1 |
| MECONIUM STAIN                                 | 10057028 | 1 |
| POIKILODERMA                                   | 10057041 | 1 |
| MULTIFOCAL MICRONODULAR PNEUMOCYTE HYPERPLASIA | 10057109 | 1 |
| SYNOVIAL FLUID RED BLOOD CELLS POSITIVE        | 10057111 | 1 |
| SYNOVIAL FLUID CRYSTAL PRESENT                 | 10057112 | 1 |
| URINE URIC ACID INCREASED                      | 10057120 | 1 |
| URINE TRANSITIONAL CELLS PRESENT               | 10057121 | 1 |
| URINE OXALATE                                  | 10057138 | 1 |
| URINE URIC ACID NORMAL                         | 10057140 | 1 |
| FRACTURE DEBRIDEMENT                           | 10057147 | 1 |
| POST LAMINECTOMY SYNDROME                      | 10057239 | 1 |
| CELL-MEDIATED CYTOTOXICITY                     | 10057250 | 1 |
| LOWER RESPIRATORY TRACT INFLAMMATION           | 10057260 | 1 |
| LUNG INDURATION                                | 10057261 | 1 |
| NEUROENDOCRINE CARCINOMA                       | 10057270 | 1 |
| WEST NILE VIRAL INFECTION                      | 10057293 | 1 |
| MICROGRAPHIA                                   | 10057333 | 1 |
| ONYCHOPHAGIA                                   | 10057342 | 1 |
| BLOOD BRAIN BARRIER DEFECT                     | 10057361 | 1 |
| IRIS INJURY                                    | 10057413 | 1 |
| CILIARY BODY DISORDER                          | 10057415 | 1 |
| PERIORBITAL DISORDER                           | 10057425 | 1 |
| VITREOUS ADHESIONS                             | 10057435 | 1 |
| VITREOUS INJURY                                | 10057436 | 1 |
| ADENOIDAL DISORDER                             | 10057449 | 1 |
| ANGIOGRAM PERIPHERAL                           | 10057452 | 1 |
| PERICARDIAL OPERATION                          | 10057463 | 1 |
| TRICUSPID VALVE CALCIFICATION                  | 10057466 | 1 |
| CORNEAL LIGHT REFLEX TEST ABNORMAL             | 10057512 | 1 |
| HAEMODYNAMIC TEST NORMAL                       | 10057522 | 1 |
| ECG P WAVE INVERTED                            | 10057526 | 1 |
| BONE MARROW MYELOGRAM NORMAL                   | 10057527 | 1 |
| BONE MARROW MYELOGRAM ABNORMAL                 | 10057528 | 1 |
| ILIAC ARTERY DISSECTION                        | 10057554 | 1 |
| SPINAL MYELOGRAM ABNORMAL                      | 10057565 | 1 |
| CHRONIC HEPATIC FAILURE                        | 10057573 | 1 |

|                                                  |          |   |
|--------------------------------------------------|----------|---|
| POST PROCEDURAL DIARRHOEA                        | 10057585 | 1 |
| POST PROCEDURAL BILE LEAK                        | 10057586 | 1 |
| POST PROCEDURAL URINE LEAK                       | 10057587 | 1 |
| BLOOD KETONE BODY DECREASED                      | 10057595 | 1 |
| BLOOD KETONE BODY PRESENT                        | 10057598 | 1 |
| BLOOD KETONE BODY ABSENT                         | 10057600 | 1 |
| CHOLEDOCHOLITHOTOMY                              | 10057601 | 1 |
| URINARY TRACT OPERATION                          | 10057611 | 1 |
| AORTIC BYPASS                                    | 10057617 | 1 |
| COCKROACH ALLERGY                                | 10057643 | 1 |
| CYTOREDUCTIVE SURGERY                            | 10057647 | 1 |
| FEMALE SEXUAL DYSFUNCTION                        | 10057671 | 1 |
| BIOPSY CHEST WALL ABNORMAL                       | 10057684 | 1 |
| ACQUIRED CLAW TOE                                | 10057689 | 1 |
| POST PROCEDURAL DISCHARGE                        | 10057751 | 1 |
| AORTOGRAM                                        | 10057775 | 1 |
| BILIARY SEPSIS                                   | 10057847 | 1 |
| ANTICONVULSANT DRUG LEVEL INCREASED              | 10057856 | 1 |
| BONE DENSITY INCREASED                           | 10057864 | 1 |
| TENDON CALCIFICATION                             | 10057888 | 1 |
| ENDOMETRIOSIS ABLATION                           | 10057902 | 1 |
| ELECTROCARDIOGRAM U WAVE PRESENT                 | 10057913 | 1 |
| TRANSPLANT EVALUATION                            | 10057925 | 1 |
| IRON BINDING CAPACITY UNSATURATED DECREASED      | 10057966 | 1 |
| TOXIC SKIN ERUPTION                              | 10057970 | 1 |
| HEPATITIS E ANTIBODY                             | 10057992 | 1 |
| INFECTED NEOPLASM                                | 10058014 | 1 |
| CANCER PAIN                                      | 10058019 | 1 |
| PROSTATIC SPECIFIC ANTIGEN NORMAL                | 10058022 | 1 |
| JOINT ADHESION                                   | 10058031 | 1 |
| CYSTATIN C INCREASED                             | 10058037 | 1 |
| ABDOMINAL SEPSIS                                 | 10058040 | 1 |
| GRAFT COMPLICATION                               | 10058060 | 1 |
| NEUTRALISING ANTIBODIES                          | 10058063 | 1 |
| PRECOCIOUS PUBERTY                               | 10058084 | 1 |
| HANGNAIL                                         | 10058109 | 1 |
| EOSINOPHIL PERCENTAGE ABNORMAL                   | 10058133 | 1 |
| SUBENDOCARDIAL ISCHAEMIA                         | 10058145 | 1 |
| REPERFUSION ARRHYTHMIA                           | 10058156 | 1 |
| LUPUS ENDOCARDITIS                               | 10058225 | 1 |
| ECG SIGNS OF MYOCARDIAL ISCHAEMIA                | 10058317 | 1 |
| PARAKERATOSIS                                    | 10058318 | 1 |
| MATERNAL THERAPY TO ENHANCE FOETAL LUNG MATURITY | 10058340 | 1 |

|                                       |          |   |
|---------------------------------------|----------|---|
| HYPOGONADISM                          | 10058359 | 1 |
| EOSINOPHILS URINE PRESENT             | 10058363 | 1 |
| BIOPSY PANCREAS ABNORMAL              | 10058374 | 1 |
| MEDIASTINAL BIOPSY ABNORMAL           | 10058378 | 1 |
| EOSINOPHILS URINE                     | 10058391 | 1 |
| BIOPSY FALLOPIAN TUBE NORMAL          | 10058397 | 1 |
| BIOPSY BLOOD VESSEL ABNORMAL          | 10058410 | 1 |
| NAIL PIGMENTATION                     | 10058455 | 1 |
| HYPEROXIA                             | 10058490 | 1 |
| NASAL ASPIRATION                      | 10058525 | 1 |
| BILE OUTPUT INCREASED                 | 10058528 | 1 |
| PERIPHERAL NERVE PALSY                | 10058530 | 1 |
| ANTI-PLATELET ANTIBODY NEGATIVE       | 10058541 | 1 |
| POOR SUCKING REFLEX                   | 10058605 | 1 |
| URINE CALCIUM/CREATININE RATIO        | 10058624 | 1 |
| TOTAL CHOLESTEROL/HDL RATIO INCREASED | 10058630 | 1 |
| TOTAL CHOLESTEROL/HDL RATIO DECREASED | 10058631 | 1 |
| EMBOLIA CUTIS MEDICAMENTOSA           | 10058729 | 1 |
| MIGRAINE PROPHYLAXIS                  | 10058734 | 1 |
| HIV ANTIBODY POSITIVE                 | 10058736 | 1 |
| HIV ANTIGEN POSITIVE                  | 10058737 | 1 |
| EYELASH DISCOLOURATION                | 10058809 | 1 |
| HEPATITIS B REACTIVATION              | 10058827 | 1 |
| ELECTIVE SURGERY                      | 10058829 | 1 |
| KLEBSIELLA BACTERAEEMIA               | 10058856 | 1 |
| ENTEROBACTER BACTERAEEMIA             | 10058857 | 1 |
| ULTRASOUND TESTES NORMAL              | 10058864 | 1 |
| CONGENITAL THROMBOCYTE DISORDER       | 10058896 | 1 |
| SALMONELLA BACTERAEEMIA               | 10058924 | 1 |
| HAEMOBILIA                            | 10058947 | 1 |
| CYSTIC LYMPHANGIOMA                   | 10058949 | 1 |
| VICTIM OF ABUSE                       | 10058984 | 1 |
| HEPATIC VEIN OCCLUSION                | 10058991 | 1 |
| ACUTE HAEMORRHAGIC LEUKOENCEPHALITIS  | 10058994 | 1 |
| GASTROINTESTINAL ISCHAEMIA            | 10059028 | 1 |
| ACUTE MYELOID LEUKAEMIA RECURRENT     | 10059034 | 1 |
| POSTPRANDIAL HYPOGLYCAEMIA            | 10059035 | 1 |
| SCEDOSPORIUM INFECTION                | 10059045 | 1 |
| BILOMA                                | 10059118 | 1 |
| CEREBROSCLEROSIS                      | 10059150 | 1 |
| CARDIAC MASSAGE                       | 10059163 | 1 |
| ACUTE HEPATITIS B                     | 10059193 | 1 |
| PERINEPHRIC COLLECTION                | 10059209 | 1 |



|                                            |          |   |
|--------------------------------------------|----------|---|
| TISSUE POLYPEPTIDE ANTIGEN                 | 10059212 | 1 |
| BIOPSY SPLEEN ABNORMAL                     | 10059227 | 1 |
| HAEMOGLOBIN URINE                          | 10059228 | 1 |
| INCISION SITE HAEMATOMA                    | 10059241 | 1 |
| DIALYSIS DISEQUILIBRIUM SYNDROME           | 10059256 | 1 |
| DELIRIUM FEBRILE                           | 10059267 | 1 |
| PANCREATIC CARCINOMA STAGE IV              | 10059326 | 1 |
| DESMOID TUMOUR                             | 10059352 | 1 |
| PARASITIC TEST POSITIVE                    | 10059422 | 1 |
| GALLBLADDER NECROSIS                       | 10059446 | 1 |
| HAEMODILUTION                              | 10059484 | 1 |
| MUCOSAL EXCORIATION                        | 10059490 | 1 |
| HAEMORRHAGIC URTICARIA                     | 10059499 | 1 |
| APOPTOSIS                                  | 10059512 | 1 |
| PERITONEAL FLUID ANALYSIS ABNORMAL         | 10059524 | 1 |
| SALIVA ANALYSIS NORMAL                     | 10059533 | 1 |
| BETA GLOBULIN DECREASED                    | 10059546 | 1 |
| OTOPLASTY                                  | 10059588 | 1 |
| NECROBIOSIS                                | 10059605 | 1 |
| STROKE IN EVOLUTION                        | 10059613 | 1 |
| ABDOMINAL WALL DISORDER                    | 10059625 | 1 |
| MUMPS ANTIBODY TEST                        | 10059638 | 1 |
| LARYNGEAL OBSTRUCTION                      | 10059639 | 1 |
| MUMPS ANTIBODY TEST NEGATIVE               | 10059645 | 1 |
| SEROCONVERSION TEST NEGATIVE               | 10059647 | 1 |
| SEX HORMONE BINDING GLOBULIN INCREASED     | 10059659 | 1 |
| REPRODUCTIVE HORMONE                       | 10059686 | 1 |
| HISTONE ANTIBODY NEGATIVE                  | 10059708 | 1 |
| ANTI-GAD ANTIBODY NEGATIVE                 | 10059730 | 1 |
| CSF MYELIN BASIC PROTEIN NORMAL            | 10059752 | 1 |
| DEXAMETHASONE SUPPRESSION TEST             | 10059774 | 1 |
| ULNAR NERVE PALSY                          | 10059790 | 1 |
| GLUCOSE-6-PHOSPHATE DEHYDROGENASE ABNORMAL | 10059902 | 1 |
| RED BLOOD CELL SPHEROCYTES PRESENT         | 10059916 | 1 |
| MYOGLOBIN BLOOD DECREASED                  | 10059940 | 1 |
| CARNITINE                                  | 10059952 | 1 |
| ALBUMIN CSF ABNORMAL                       | 10059976 | 1 |
| ALBUMIN CSF DECREASED                      | 10059979 | 1 |
| BLOOD ALCOHOL ABNORMAL                     | 10059995 | 1 |
| BLOOD GALACTOSE                            | 10060022 | 1 |
| INTERFERON GAMMA LEVEL                     | 10060023 | 1 |
| GASTRIC PH                                 | 10060024 | 1 |
| URINE LACTIC ACID                          | 10060064 | 1 |

|                                               |          |   |
|-----------------------------------------------|----------|---|
| URINE MERCURY ABNORMAL                        | 10060095 | 1 |
| POTASSIUM CHLORIDE SENSITIVITY TEST           | 10060194 | 1 |
| PLATELET FACTOR 4 INCREASED                   | 10060219 | 1 |
| PLATELET FACTOR 4 DECREASED                   | 10060220 | 1 |
| POTASSIUM CHLORIDE SENSITIVITY TEST ABNORMAL  | 10060225 | 1 |
| RHEUMATOID FACTOR QUANTITATIVE INCREASED      | 10060234 | 1 |
| RIGHT VENTRICULAR SYSTOLIC PRESSURE DECREASED | 10060237 | 1 |
| REVERSE TRI-IODOTHYRONINE                     | 10060292 | 1 |
| RESPIRATORY TRACT INFECTION BACTERIAL         | 10060693 | 1 |
| PRESBYOESOPHAGUS                              | 10060696 | 1 |
| GASTRIC BANDING                               | 10060785 | 1 |
| LARYNGOMALACIA                                | 10060786 | 1 |
| ABDOMINAL HERNIA REPAIR                       | 10060802 | 1 |
| MYXOEDEMA COMA                                | 10060819 | 1 |
| NECROLYTIC MIGRATORY ERYTHEMA                 | 10060821 | 1 |
| HUMAN HERPES VIRUS 6 SEROLOGY NEGATIVE        | 10060828 | 1 |
| PROSTATE CANCER                               | 10060862 | 1 |
| TRANSPLANT FAILURE                            | 10060872 | 1 |
| AORTIC RUPTURE                                | 10060874 | 1 |
| BENIGN FAMILIAL HAEMATURIA                    | 10060876 | 1 |
| HEREDITARY HAEMOLYTIC ANAEMIA                 | 10060893 | 1 |
| CALCIUM IONISED ABNORMAL                      | 10060896 | 1 |
| CALCIUM IONISED INCREASED                     | 10060899 | 1 |
| VOLUME BLOOD                                  | 10060917 | 1 |
| ABDOMINAL HERNIA OBSTRUCTIVE                  | 10060923 | 1 |
| ABDOMINAL INJURY                              | 10060924 | 1 |
| ADENOVIRUS INFECTION                          | 10060931 | 1 |
| ANALGESIC DRUG LEVEL DECREASED                | 10060941 | 1 |
| ANALGESIC DRUG LEVEL INCREASED                | 10060942 | 1 |
| ARTHROPOD-BORNE DISEASE                       | 10060970 | 1 |
| APICAL GRANULOMA                              | 10060983 | 1 |
| SPUTUM NORMAL                                 | 10060989 | 1 |
| SPUTUM TEST                                   | 10060990 | 1 |
| BENIGN SOFT TISSUE NEOPLASM                   | 10061004 | 1 |
| BLOOD CANNABINOIDS                            | 10061012 | 1 |
| BRACHYTHERAPY                                 | 10061018 | 1 |
| BURSITIS INFECTIVE                            | 10061022 | 1 |
| CATECHOLAMINES URINE INCREASED                | 10061034 | 1 |
| CENTRAL NERVOUS SYSTEM INFECTION              | 10061036 | 1 |
| CESTODE INFECTION                             | 10061039 | 1 |
| CLOSTRIDIAL INFECTION                         | 10061043 | 1 |
| CONGENITAL CARDIOVASCULAR ANOMALY             | 10061054 | 1 |
| SPUTUM DECREASED                              | 10061081 | 1 |

|                                         |          |   |
|-----------------------------------------|----------|---|
| ENDOCARDIAL DISEASE                     | 10061120 | 1 |
| FEMALE GENITAL TRACT FISTULA            | 10061149 | 1 |
| GASTROENTERITIS BACTERIAL               | 10061166 | 1 |
| GASTROINTESTINAL NEOPLASM               | 10061174 | 1 |
| GENITAL INFECTION FUNGAL                | 10061180 | 1 |
| HAEMATOPOIETIC NEOPLASM                 | 10061187 | 1 |
| HAMARTOMA                               | 10061193 | 1 |
| LEUKAEMIA IN REMISSION                  | 10061220 | 1 |
| MALIGNANT LYMPHOID NEOPLASM             | 10061240 | 1 |
| LARYNGEAL DISORDER                      | 10061263 | 1 |
| LEARNING DISORDER                       | 10061265 | 1 |
| MALIGNANT NERVOUS SYSTEM NEOPLASM       | 10061268 | 1 |
| MALIGNANT PERITONEAL NEOPLASM           | 10061269 | 1 |
| MENINGEAL NEOPLASM                      | 10061282 | 1 |
| METASTASES TO NERVOUS SYSTEM            | 10061287 | 1 |
| MUCOSAL EROSION                         | 10061297 | 1 |
| NAIL INFECTION                          | 10061304 | 1 |
| NECK DEFORMITY                          | 10061307 | 1 |
| NERVE ROOT INJURY                       | 10061310 | 1 |
| NEUROLOGICAL EYELID DISORDER            | 10061312 | 1 |
| PARAGANGLION NEOPLASM                   | 10061332 | 1 |
| PARAPROTEINAEMIA                        | 10061333 | 1 |
| SPIROCHAETAL INFECTION                  | 10061370 | 1 |
| THERAPEUTIC REACTION TIME DECREASED     | 10061380 | 1 |
| TRICUSPID VALVE DISEASE                 | 10061389 | 1 |
| TYPHUS                                  | 10061393 | 1 |
| VICTIM OF CRIME                         | 10061409 | 1 |
| VISUAL PATHWAY DISORDER                 | 10061411 | 1 |
| CRYSTAL ARTHROPATHY                     | 10061419 | 1 |
| AMNESTIC DISORDER                       | 10061423 | 1 |
| URINE RETINOL BINDING PROTEIN INCREASED | 10061432 | 1 |
| CENTRAL NERVOUS SYSTEM STIMULATION      | 10061444 | 1 |
| DENTOFACIAL FUNCTIONAL DISORDER         | 10061454 | 1 |
| EXTERNAL EAR DISORDER                   | 10061456 | 1 |
| ERECTILE DYSFUNCTION                    | 10061461 | 1 |
| PULSE WAVEFORM ABNORMAL                 | 10061475 | 1 |
| RENAL NEOPLASM                          | 10061482 | 1 |
| PULSE WAVEFORM                          | 10061488 | 1 |
| POST PROCEDURAL FISTULA                 | 10061489 | 1 |
| RETINOSCHISIS                           | 10061492 | 1 |
| RICKETTSIOSIS                           | 10061495 | 1 |
| SCAN ADRENAL GLAND                      | 10061503 | 1 |
| SCAN PARATHYROID                        | 10061507 | 1 |

|                                                    |          |   |
|----------------------------------------------------|----------|---|
| MYOTONIA                                           | 10061533 | 1 |
| OVARIAN NEOPLASM                                   | 10061535 | 1 |
| PULMONARY VALVE DISEASE                            | 10061541 | 1 |
| SMALL INTESTINAL ULCER HAEMORRHAGE                 | 10061550 | 1 |
| URINE ELECTROLYTES DECREASED                       | 10061579 | 1 |
| ADRENAL NEOPLASM                                   | 10061588 | 1 |
| ABORTION COMPLETE                                  | 10061614 | 1 |
| ABORTION SPONTANEOUS COMPLETE                      | 10061616 | 1 |
| ANALGESIC INTERVENTION SUPPORTIVE THERAPY          | 10061631 | 1 |
| ANGIODYSPLASIA                                     | 10061636 | 1 |
| AORTIC SURGERY                                     | 10061651 | 1 |
| AORTIC VALVE REPAIR                                | 10061652 | 1 |
| ARTERIAL GRAFT                                     | 10061655 | 1 |
| ATYPICAL MYCOBACTERIAL INFECTION                   | 10061663 | 1 |
| ARTERIOGRAM NORMAL                                 | 10061682 | 1 |
| BLADDER INJURY                                     | 10061698 | 1 |
| BLADDER OPERATION                                  | 10061699 | 1 |
| BLOOD CANNABINOIDS DECREASED                       | 10061712 | 1 |
| BLOOD CANNABINOIDS NORMAL                          | 10061714 | 1 |
| CEREBELLAR TUMOUR                                  | 10061750 | 1 |
| CEREBROVASCULAR STENOSIS                           | 10061751 | 1 |
| CERVIX OPERATION                                   | 10061752 | 1 |
| CHORIORETINAL DISORDER                             | 10061763 | 1 |
| COAGULATION FACTOR V LEVEL ABNORMAL                | 10061771 | 1 |
| CORNEAL INFECTION                                  | 10061788 | 1 |
| CSF PRESSURE ABNORMAL                              | 10061798 | 1 |
| CARDIAC ELECTROPHYSIOLOGIC STUDY NORMAL            | 10061807 | 1 |
| DEFORMITY THORAX                                   | 10061810 | 1 |
| DUODENAL OPERATION                                 | 10061826 | 1 |
| ENTROPION                                          | 10061842 | 1 |
| EYE EXERCISES                                      | 10061851 | 1 |
| FACIAL OPERATION                                   | 10061854 | 1 |
| FALLOPIAN TUBE NEOPLASM                            | 10061855 | 1 |
| FASCIAL OPERATION                                  | 10061856 | 1 |
| TREMATODE INFECTION                                | 10061859 | 1 |
| ENDOSCOPY GASTROINTESTINAL NORMAL                  | 10061861 | 1 |
| OROPHARYNGITIS FUNGAL                              | 10061891 | 1 |
| OVARIAN GERM CELL CANCER                           | 10061893 | 1 |
| PANCREATIC ENZYMES ABNORMAL                        | 10061899 | 1 |
| PANCREATIC OPERATION                               | 10061903 | 1 |
| PARANASAL SINUS AND NASAL CAVITY MALIGNANT NEOPLAS | 10061909 | 1 |
| PARASOMNIA                                         | 10061910 | 1 |
| PARATHYROID SCAN ABNORMAL                          | 10061951 | 1 |

|                                           |          |   |
|-------------------------------------------|----------|---|
| GASTRIC STENOSIS                          | 10061970 | 1 |
| GASTROINTESTINAL OBSTRUCTION              | 10061974 | 1 |
| GENITAL INFECTION FEMALE                  | 10061977 | 1 |
| GLOMERULOSCLEROSIS                        | 10061989 | 1 |
| HAEMOPHILIA                               | 10061992 | 1 |
| HEART VALVE OPERATION                     | 10061994 | 1 |
| HEART VALVE STENOSIS                      | 10061996 | 1 |
| HEREDITARY ATAXIA                         | 10062002 | 1 |
| HUMAN T-CELL LYMPHOTROPIC VIRUS INFECTION | 10062007 | 1 |
| IMMUNE AGGLUTININS                        | 10062011 | 1 |
| IMMUNOSUPPRESSANT DRUG LEVEL              | 10062013 | 1 |
| IMMUNOSUPPRESSANT DRUG LEVEL DECREASED    | 10062014 | 1 |
| KERATITIS VIRAL                           | 10062029 | 1 |
| LACTOBACILLUS INFECTION                   | 10062031 | 1 |
| LUNG NEOPLASM                             | 10062042 | 1 |
| LYMPHOCYTE MORPHOLOGY                     | 10062046 | 1 |
| HISTOLOGY ABNORMAL                        | 10062059 | 1 |
| PERFORATED ULCER                          | 10062065 | 1 |
| PERINEAL OPERATION                        | 10062068 | 1 |
| RADIOTHERAPY TO BREAST                    | 10062090 | 1 |
| RHEUMATIC HEART DISEASE                   | 10062110 | 1 |
| SPLENIC INFECTION                         | 10062112 | 1 |
| TENDON OPERATION                          | 10062121 | 1 |
| TONGUE NEOPLASM                           | 10062129 | 1 |
| TONSILLAR NEOPLASM                        | 10062131 | 1 |
| TRACHEAL NEOPLASM                         | 10062133 | 1 |
| STOMACH SCAN NORMAL                       | 10062146 | 1 |
| VARICOSE VEIN OPERATION                   | 10062168 | 1 |
| VENOUS OPERATION                          | 10062175 | 1 |
| METASTASES TO SOFT TISSUE                 | 10062197 | 1 |
| MORAXELLA INFECTION                       | 10062204 | 1 |
| MUCOSAL BIOPSY                            | 10062205 | 1 |
| MYCOBACTERIAL INFECTION                   | 10062207 | 1 |
| URETERAL DISORDER                         | 10062220 | 1 |
| URINE CANNABINOIDS DECREASED              | 10062227 | 1 |
| SKELETAL MUSCLE ENZYMES                   | 10062246 | 1 |
| SKIN IMPLANT                              | 10062248 | 1 |
| SMALL INTESTINE OPERATION                 | 10062252 | 1 |
| SPECIFIC GRAVITY BODY FLUID               | 10062256 | 1 |
| SPECIFIC GRAVITY BODY FLUID NORMAL        | 10062260 | 1 |
| BLAST CELL COUNT INCREASED                | 10062274 | 1 |
| CONGENITAL CYST                           | 10062328 | 1 |
| CONGENITAL FOOT MALFORMATION              | 10062332 | 1 |

|                                          |          |   |
|------------------------------------------|----------|---|
| TRUNCUS COELIACUS THROMBOSIS             | 10062363 | 1 |
| ERYTHEMA MIGRANS                         | 10062488 | 1 |
| EXOCRINE PANCREATIC FUNCTION TEST NORMAL | 10062518 | 1 |
| EROSIVE DUODENITIS                       | 10062532 | 1 |
| CONGENITAL MYOPATHY                      | 10062547 | 1 |
| VAGINAL EROSION                          | 10062558 | 1 |
| INJECTABLE CONTRACEPTION                 | 10062577 | 1 |
| ORAL ADMINISTRATION COMPLICATION         | 10062611 | 1 |
| CORNEAL ENDOTHELIITIS                    | 10062621 | 1 |
| PANCREATIC ENZYMES DECREASED             | 10062646 | 1 |
| CAPILLARY FRAGILITY TEST                 | 10062658 | 1 |
| NEMATODIASIS                             | 10062701 | 1 |
| HAEMOGLOBIN A2                           | 10062734 | 1 |
| VASOACTIVE INTESTINAL POLYPEPTIDE TEST   | 10062736 | 1 |
| TRISOMY 15                               | 10062757 | 1 |
| ANKLE BRACHIAL INDEX NORMAL              | 10062761 | 1 |
| HYPOPHYSITIS                             | 10062767 | 1 |
| NASAL CAVITY MASS                        | 10062771 | 1 |
| PINGUECULITIS                            | 10062889 | 1 |
| OLFACTORY TEST ABNORMAL                  | 10062927 | 1 |
| GASTRIC HYPERTONIA                       | 10062931 | 1 |
| INNER EAR OPERATION                      | 10062990 | 1 |
| PEDAL PULSE DECREASED                    | 10062993 | 1 |
| HAEMOGLOBIN ELECTROPHORESIS              | 10063002 | 1 |
| HAEMATOTYMPANUM                          | 10063013 | 1 |
| ATHERECTOMY                              | 10063025 | 1 |
| FALSE POSITIVE TUBERCULOSIS TEST         | 10063050 | 1 |
| PERITONEAL FLUID ANALYSIS                | 10063062 | 1 |
| APPENDICITIS NONINFECTIVE                | 10063063 | 1 |
| APPLICATION SITE DISCOMFORT              | 10063072 | 1 |
| PREGNANCY WITH CONTRACEPTIVE DEVICE      | 10063130 | 1 |
| ACOUSTIC NEURITIS                        | 10063162 | 1 |
| MACULAR SCAR                             | 10063185 | 1 |
| PARASITE DNA TEST                        | 10063194 | 1 |
| CHRONIC ALLOGRAFT NEPHROPATHY            | 10063209 | 1 |
| AMPHETAMINES                             | 10063227 | 1 |
| AMPHETAMINES POSITIVE                    | 10063228 | 1 |
| BARBITURATES POSITIVE                    | 10063230 | 1 |
| OESTRADIOL ABNORMAL                      | 10063266 | 1 |
| MICROSCOPIC POLYANGIITIS                 | 10063344 | 1 |
| SYNOVIAL FLUID CELL COUNT                | 10063367 | 1 |
| SYNOVIAL FLUID PROTEIN                   | 10063368 | 1 |
| DRUG THERAPY                             | 10063370 | 1 |

|                                             |          |   |
|---------------------------------------------|----------|---|
| POLYPOIDAL CHOROIDAL VASCULOPATHY           | 10063381 | 1 |
| ROSAI-DORFMAN SYNDROME                      | 10063397 | 1 |
| DIHYDROTESTOSTERONE LEVEL                   | 10063535 | 1 |
| METASTATIC SQUAMOUS CELL CARCINOMA          | 10063569 | 1 |
| EXPOSURE TO CHEMICAL POLLUTION              | 10063599 | 1 |
| RADIOTHERAPY TO LYMPH NODES                 | 10063616 | 1 |
| HIPPOCAMPAL SCLEROSIS                       | 10063629 | 1 |
| GENITAL INJURY                              | 10063630 | 1 |
| PYRAMIDAL TRACT SYNDROME                    | 10063636 | 1 |
| KLEIHAUER-BETKE TEST                        | 10063652 | 1 |
| LYMPHOCYTIC HYPOPHYSITIS                    | 10063685 | 1 |
| ANTIPSYCHOTIC DRUG LEVEL INCREASED          | 10063686 | 1 |
| URAEMIC GASTROPATHY                         | 10063709 | 1 |
| HEPATIC AMOEBIASIS                          | 10063741 | 1 |
| ELECTROCARDIOGRAM QT INTERVAL ABNORMAL      | 10063748 | 1 |
| IMPLANT SITE INFLAMMATION                   | 10063781 | 1 |
| VULVAL HAEMORRHAGE                          | 10063816 | 1 |
| UNDERSENSING                                | 10063835 | 1 |
| ATRIOVENTRICULAR SEPTAL DEFECT              | 10063836 | 1 |
| APPLICATION SITE INDURATION                 | 10063839 | 1 |
| VISCEROPTOSIS                               | 10063840 | 1 |
| IMPLANT SITE EXTRAVASATION                  | 10063856 | 1 |
| IMPLANT SITE INDURATION                     | 10063860 | 1 |
| IMPLANT SITE PUSTULES                       | 10063866 | 1 |
| IMPLANT SITE SWELLING                       | 10063867 | 1 |
| LOWER RESPIRATORY TRACT INFECTION BACTERIAL | 10063890 | 1 |
| RENAL ISCHAEMIA                             | 10063897 | 1 |
| DOLICHOCOLON                                | 10063917 | 1 |
| KABUKI MAKE-UP SYNDROME                     | 10063935 | 1 |
| ABDOMINAL BRUIT                             | 10063943 | 1 |
| PULMONARY AMYLOIDOSIS                       | 10063945 | 1 |
| ILEOLECTOMY                                 | 10063950 | 1 |
| BRUDZINSKI'S SIGN                           | 10064010 | 1 |
| TUBERCULIN TEST FALSE POSITIVE              | 10064057 | 1 |
| MULTIPLE SYSTEM ATROPHY                     | 10064060 | 1 |
| FACIOSCAPULOHUMERAL MUSCULAR DYSTROPHY      | 10064087 | 1 |
| NAIL BED INFLAMMATION                       | 10064088 | 1 |
| SUGGESTIBILITY                              | 10064093 | 1 |
| AMNIOTIC BAND SYNDROME                      | 10064100 | 1 |
| INJECTION SITE JOINT INFLAMMATION           | 10064111 | 1 |
| CONJUNCTIVOCHALASIS                         | 10064132 | 1 |
| RETINAL ANEURYSM                            | 10064145 | 1 |
| LAMINAPLASTY                                | 10064161 | 1 |

|                                                 |          |   |
|-------------------------------------------------|----------|---|
| BONE MARROW OEDEMA SYNDROME                     | 10064269 | 1 |
| MALIGNANT ATROPHIC PAPULOSIS                    | 10064281 | 1 |
| LABELLED DRUG-FOOD INTERACTION MEDICATION ERROR | 10064374 | 1 |
| CARDIAC VEIN DISSECTION                         | 10064408 | 1 |
| CD19 LYMPHOCYTES DECREASED                      | 10064428 | 1 |
| COLPOSCOPY ABNORMAL                             | 10064457 | 1 |
| MUCOSAL EXFOLIATION                             | 10064486 | 1 |
| INCARCERATED UMBILICAL HERNIA                   | 10064492 | 1 |
| EXCESSIVE SKIN                                  | 10064503 | 1 |
| AUTOIMMUNE MYOCARDITIS                          | 10064539 | 1 |
| MARCUS GUNN SYNDROME                            | 10064583 | 1 |
| ORAL MUCOSA EROSION                             | 10064594 | 1 |
| NASAL CAVITY PACKING REMOVAL                    | 10064609 | 1 |
| SERUM AMYLOID A PROTEIN INCREASED               | 10064649 | 1 |
| OSTEONECROSIS OF JAW                            | 10064658 | 1 |
| RED BLOOD CELL ACANTHOCYTES PRESENT             | 10064662 | 1 |
| GRAFT VERSUS HOST DISEASE IN LIVER              | 10064676 | 1 |
| PORTAL VENOUS GAS                               | 10064711 | 1 |
| ABSCESS MANAGEMENT                              | 10064718 | 1 |
| THANATOPHOBIA                                   | 10064723 | 1 |
| CSF MONONUCLEAR CELL COUNT INCREASED            | 10064741 | 1 |
| BREAST HAEMATOMA                                | 10064753 | 1 |
| PERIARTHRITIS CALCAREA                          | 10064754 | 1 |
| SALIVARY GLAND OPERATION                        | 10064759 | 1 |
| CARDIAC VALVE PROSTHESIS USER                   | 10064776 | 1 |
| URINARY TRACT INFECTION VIRAL                   | 10064825 | 1 |
| PUS IN STOOL                                    | 10064830 | 1 |
| CHEMICAL PEEL OF SKIN                           | 10064840 | 1 |
| INCISION SITE INFLAMMATION                      | 10064903 | 1 |
| AGE-RELATED MACULAR DEGENERATION                | 10064930 | 1 |
| ACINETOBACTER BACTERAEMIA                       | 10064965 | 1 |
| EYELID HAEMATOMA                                | 10064976 | 1 |
| NEUTRALISING ANTIBODIES NEGATIVE                | 10064981 | 1 |
| RECTAL FISSURE                                  | 10064993 | 1 |
| DRUG EXPOSURE BEFORE PREGNANCY                  | 10064998 | 1 |
| POST-TRAUMATIC PAIN                             | 10065016 | 1 |
| PARTNER STRESS                                  | 10065022 | 1 |
| HERPES ZOSTER DISSEMINATED                      | 10065038 | 1 |
| LOSS OF DREAMING                                | 10065085 | 1 |
| EYE MUSCLE ENTRAPMENT                           | 10065088 | 1 |
| DISCOGRAM ABNORMAL                              | 10065094 | 1 |
| GASTROINTESTINAL ENDOSCOPIC THERAPY             | 10065100 | 1 |
| REACTOGENICITY EVENT                            | 10065109 | 1 |



|                                                  |          |   |
|--------------------------------------------------|----------|---|
| GLOBULIN ABNORMAL                                | 10065125 | 1 |
| VIRAL SKIN INFECTION                             | 10065173 | 1 |
| LYMPHADENITIS VIRAL                              | 10065209 | 1 |
| TONSILLITIS BACTERIAL                            | 10065235 | 1 |
| OBTURATOR NEUROPATHY                             | 10065292 | 1 |
| INTERVERTEBRAL DISC ANNULAR TEAR                 | 10065294 | 1 |
| MACULAR RUPTURE                                  | 10065319 | 1 |
| CONTACT LENS THERAPY                             | 10065344 | 1 |
| MINI MENTAL STATUS EXAMINATION                   | 10065423 | 1 |
| NEUROPSYCHOLOGICAL TEST ABNORMAL                 | 10065426 | 1 |
| HYDROGEN BREATH TEST                             | 10065439 | 1 |
| VENOUS HAEMORRHAGE                               | 10065441 | 1 |
| ANTI-GLOMERULAR BASEMENT MEMBRANE ANTIBODY POSIT | 10065513 | 1 |
| ANTIENDOMYSIAL ANTIBODY POSITIVE                 | 10065514 | 1 |
| ANTIMYOCARDIAL ANTIBODY POSITIVE                 | 10065515 | 1 |
| NASAL MUCOSAL ULCER                              | 10065546 | 1 |
| RENAL ARTERY ARTERIOSCLEROSIS                    | 10065561 | 1 |
| THYMUS ENLARGEMENT                               | 10065588 | 1 |
| PUNCTURE SITE PAIN                               | 10065599 | 1 |
| STOMA SITE INFLAMMATION                          | 10065669 | 1 |
| ACTH STIMULATION TEST NORMAL                     | 10065674 | 1 |
| ACTH STIMULATION TEST ABNORMAL                   | 10065675 | 1 |
| OCULAR SARCOIDOSIS                               | 10065700 | 1 |
| PANCREATIC DUCT STENOSIS                         | 10065703 | 1 |
| RECTAL OBSTRUCTION                               | 10065707 | 1 |
| LARYNGEAL INFLAMMATION                           | 10065735 | 1 |
| MUCOSAL INFECTION                                | 10065764 | 1 |
| CRANIAL NERVE INFECTION                          | 10065765 | 1 |
| MUSCULOSKELETAL DEFORMITY                        | 10065783 | 1 |
| FALLOPIAN TUBE OBSTRUCTION                       | 10065789 | 1 |
| FALLOPIAN TUBE PERFORATION                       | 10065790 | 1 |
| FISTULA OF SMALL INTESTINE                       | 10065850 | 1 |
| CENTRAL OBESITY                                  | 10065941 | 1 |
| TOOTH AVULSION                                   | 10065953 | 1 |
| DEVICE ELECTRICAL FINDING                        | 10065963 | 1 |
| URETHRAL BULKING AGENT INJECTION                 | 10066000 | 1 |
| CARDIAC AUTONOMIC NEUROPATHY                     | 10066001 | 1 |
| VACTERL SYNDROME                                 | 10066022 | 1 |
| POST VACCINATION AUTOINOCULATION                 | 10066043 | 1 |
| PERINEAL CYST                                    | 10066058 | 1 |
| FINE MOTOR DELAY                                 | 10066088 | 1 |
| POLYMORPHIC ERUPTION OF PREGNANCY                | 10066100 | 1 |
| IMMOBILISATION PROLONGED                         | 10066112 | 1 |

|                                                       |          |   |
|-------------------------------------------------------|----------|---|
| CARDIOPULMONARY BYPASS                                | 10066123 | 1 |
| EVIDENCE BASED TREATMENT                              | 10066150 | 1 |
| DIFFUSE AXONAL INJURY                                 | 10066213 | 1 |
| METAPNEUMOVIRUS INFECTION                             | 10066226 | 1 |
| MEDIASTINAL SHIFT                                     | 10066239 | 1 |
| ABORTION OF ECTOPIC PREGNANCY                         | 10066266 | 1 |
| PSEUDOHALLUCINATION                                   | 10066297 | 1 |
| LIP HAEMATOMA                                         | 10066304 | 1 |
| GENOTYPE DRUG RESISTANCE TEST POSITIVE                | 10066368 | 1 |
| NATUROPATHY                                           | 10066398 | 1 |
| NAPRAPATHY                                            | 10066399 | 1 |
| RENAL-LIMITED THROMBOTIC MICROANGIOPATHY              | 10085346 | 1 |
| ENDOCRINE SYSTEM EXAMINATION                          | 10085389 | 1 |
| VACCINE ASSOCIATED ENHANCED DISEASE                   | 10085491 | 1 |
| HORMONE RECEPTOR NEGATIVE HER2 POSITIVE BREAST CANCER | 10085561 | 1 |
| HIGH-RESOLUTION COMPUTERISED TOMOGRAPHY OF LUNG       | 10085782 | 1 |
| SOMNIPHOBIA                                           | 10085856 | 1 |
| EAR, NOSE AND THROAT DISORDER                         | 10085881 | 1 |
| TRAUMATIC HEART INJURY                                | 10085907 | 1 |
| ULTRASOUND HEAD ABNORMAL                              | 10085916 | 1 |
| DENGUE VIRUS TEST                                     | 10085983 | 1 |
| NEUROPATHIC PRURITUS                                  | 10085997 | 1 |
| RADIOIMMUNOTHERAPY                                    | 10086030 | 1 |
| GENITAL SCARRING                                      | 10086046 | 1 |
| ANTI-PLATELET FACTOR 4 ANTIBODY NEGATIVE              | 10086160 | 1 |
| DERMOSCOPY                                            | 10086166 | 1 |
| CHRONIC INFLAMMATORY RESPONSE SYNDROME                | 10086201 | 1 |
| COMBINED TIBIA-FIBULA FRACTURE                        | 10086207 | 1 |
| ASTROVIRUS TEST                                       | 10086214 | 1 |
| DELAYED UMBILICAL CORD CLAMPING                       | 10086215 | 1 |
| ANTIPSYCHOTIC THERAPY                                 | 10086273 | 1 |
| VACCINE INDUCED ANTIBODY ABSENT                       | 10086346 | 1 |
| ROTATOR CUFF TEAR ARTHROPATHY                         | 10086355 | 1 |
| COMPLETE DECONGESTIVE THERAPY                         | 10086420 | 1 |
| BONE DEMINERALISATION                                 | 10086421 | 1 |
| AMNIOTIC FLUID INDEX NORMAL                           | 10086422 | 1 |
| TRIGEMINAL NEUROPATHY                                 | 10086511 | 1 |
| FACTOR VIII ACTIVITY TEST                             | 10086559 | 1 |
| OLFACTORY DYSFUNCTION                                 | 10086567 | 1 |
| ORAL HERPES ZOSTER                                    | 10086594 | 1 |
| FOLLICULAR DISORDER                                   | 10086657 | 1 |
| IDIOPATHIC ENVIRONMENTAL INTOLERANCE                  | 10086717 | 1 |
| TENDON SHEATH EFFUSION                                | 10086724 | 1 |

|                                       |          |   |
|---------------------------------------|----------|---|
| PULMONARY BLASTOMYCOSIS               | 10086752 | 1 |
| BLOOD PRODUCT REFUSAL                 | 10086776 | 1 |
| CORNEAL REFLEX TEST                   | 10086820 | 1 |
| PERIPHERAL VEIN THROMBOSIS            | 10087102 | 1 |
| PERIORBITAL DERMATITIS                | 10087203 | 1 |
| OROPHARYNGEAL SUCTIONING              | 10087274 | 1 |
| MAXILLOFACIAL PAIN                    | 10087335 | 1 |
| PELVIC FLUID COLLECTION DRAINAGE      | 10087353 | 1 |
| COMPUTERISED TOMOGRAM VENOGRAPHY HEAD | 10087355 | 1 |
| INTESTINAL BARRIER DYSFUNCTION        | 10087367 | 1 |
| NEUROGENIC COUGH                      | 10087605 | 1 |
| THALAMIC STROKE                       | 10087626 | 1 |
| VERTEBROBASILAR ARTERY DISSECTION     | 10087672 | 1 |

**Supplementary Table 6. Menstrual adverse events by vaccine type reported in the VAERS database as of 22 November 2022.**

| Vaccine Type                                                                      | Vaccine Type Code | Events Reported |
|-----------------------------------------------------------------------------------|-------------------|-----------------|
|                                                                                   |                   | 35386           |
| COVID19 VACCINE                                                                   | COVID19           | 26714           |
| HUMAN PAPILLOMAVIRUS (TYPES 6, 11, 16, 18) RECOMBINANT VACCINE                    | HPV4              | 1198            |
| HEPATITIS B VACCINE                                                               | HEP               | 1013            |
| INFLUENZA VIRUS VACCINE, TRIVALENT (INJECTED)                                     | FLU3(SEASONAL)    | 581             |
| ZOSTER VACCINE                                                                    | VARZOS            | 566             |
| UNKNOWN VACCINES                                                                  | UNK               | 394             |
| TETANUS AND DIPHTHERIA TOXOIDS AND ACELLULAR PERTUSSIS VACCINE (BOOSTRIX/ADACEL)  | TDAP              | 368             |
| INFLUENZA VIRUS VACCINE, QUADRIVALENT (INJECTED)                                  | FLU4(SEASONAL)    | 303             |
| MEASLES, MUMPS AND RUBELLA VIRUS VACCINE, LIVE                                    | MMR               | 299             |
| HEPATITIS A                                                                       | HEPA              | 261             |
| TYPHOID VACCINE                                                                   | TYP               | 258             |
| MENINGOCOCCAL VACCINE (MENACTRA)                                                  | MNQ               | 236             |
| INFLUENZA VIRUS VACCINE, NO BRAND NAME                                            | FLUX(SEASONAL)    | 233             |
| HUMAN PAPILLOMAVIRUS (TYPES 6, 11,16, 18, 31, 33, 45, 52, 58) RECOMBINANT VACCINE | HPV9              | 216             |
| VARIVAX-VARICELLA VIRUS LIVE                                                      | VARCEL            | 201             |
| PNEUMOCOCCAL VACCINE, POLYVALENT                                                  | PPV               | 188             |
| TETANUS AND DIPHTHERIA TOXOIDS, ADULT                                             | TD                | 176             |
| COVID19-2                                                                         | COVID19-2         | 152             |
| DIPHTHERIA AND TETANUS TOXOIDS AND ACELLULAR PERTUSSIS VACCINE                    | DTAP              | 152             |
| RABIES VIRUS VACCINE                                                              | RAB               | 131             |
| HAEMOPHILUS B CONJUGATE VACCINE                                                   | HIBV              | 124             |
| POLIOVIRUS VACCINE INACTIVATED                                                    | IPV               | 124             |
| ANTHRAX VACCINE                                                                   | ANTH              | 112             |
| ROTAVIRUS VACCINE, LIVE, ORAL, PENTAVALENT                                        | RV5               | 97              |

|                                                                                                                                   |                 |    |
|-----------------------------------------------------------------------------------------------------------------------------------|-----------------|----|
| PNEUMOCOCCAL, 13-VALENT VACCINE (PREVNAR13)                                                                                       | PNC13           | 95 |
| INFLUENZA (H1N1) MONOVALENT (INJECTED)                                                                                            | FLU(H1N1)       | 80 |
| POLIOVIRUS VACCINE TRIVALENT, LIVE, ORAL                                                                                          | OPV             | 78 |
| INFLUENZA VIRUS VACCINE, TRIVALENT (INTRANASAL SPRAY)                                                                             | FLUN3(SEASONAL) | 75 |
| MENINGOCOCCAL B VACCINE                                                                                                           | MENB            | 65 |
| YELLOW FEVER VACCINE                                                                                                              | YF              | 65 |
| DIPHTHERIA AND TETANUS TOXOIDS AND ACELLULAR PERTUSSIS VACCINE + HEPATITIS B + INACTIVATED POLIOVIRUS VACCINE                     | DTAPHEPBIP      | 61 |
| DIPHTHERIA AND TETANUS TOXOIDS AND PERTUSSIS VACCINE                                                                              | DTP             | 61 |
| PNEUMOCOCCAL, 7-VALENT VACCINE (PREVNAR)                                                                                          | PNC             | 52 |
| MENINGOCOCCAL POLYSACCHARIDE VACCINE                                                                                              | MEN             | 48 |
| INFLUENZA VIRUS VACCINE, QUADRIVALENT, CELL-CULTURE-DERIVED (INJECTED)                                                            | FLUC4(SEASONAL) | 45 |
| TETANUS TOXOID                                                                                                                    | TTOX            | 43 |
| INFLUENZA (H1N1) MONOVALENT, (INTRANASAL SPRAY)                                                                                   | FLUN(H1N1)      | 38 |
| HEPATITIS A AND HEPATITIS B VACCINE                                                                                               | HEPAB           | 37 |
| LYME VACCINE (LYMERIX)                                                                                                            | LYME            | 37 |
| ROTAVIRUS VACCINE (ROTASHIELD)                                                                                                    | RV              | 36 |
| INFLUENZA(H1N1) MONOVALENT, UNKNOWN MANUFACTURER                                                                                  | FLUX(H1N1)      | 35 |
| SMALLPOX VACCINE                                                                                                                  | SMALL           | 35 |
| DIPHTHERIA AND TETANUS TOXOIDS AND ACELLULAR PERTUSSIS VACCINE + INACTIVATED POLIOVIRUS VACCINE + HAEMOPHILUS B CONJUGATE VACCINE | DTAPIPVHIB      | 25 |
| DIPHTHERIA AND TETANUS TOXOIDS AND ACELLULAR PERTUSSIS VACCINE + INACTIVATED POLIOVIRUS VACCINE                                   | DTAPIPV         | 24 |
| HUMAN PAPILLOMAVIRUS VACCINE                                                                                                      | HPVX            | 24 |

|                                                                                                                                              |                 |    |
|----------------------------------------------------------------------------------------------------------------------------------------------|-----------------|----|
| DIPHTHERIA AND TETANUS TOXOIDS, PEDIATRIC                                                                                                    | DT              | 23 |
| INFLUENZA VIRUS VACCINE, QUADRIVALENT (INTRANASAL SPRAY)                                                                                     | FLUN4(SEASONAL) | 23 |
| INFLUENZA VIRUS VACCINE, QUADRIVALENT, ADJUVANT (INJECTED)                                                                                   | FLUA4(SEASONAL) | 21 |
| MEASLES, MUMPS, RUBELLA, AND VARICELLA VACCINE (PROQUAD)                                                                                     | MMRV            | 20 |
| INFLUENZA VIRUS VACCINE, TRIVALENT, ADJUVANT (INJECTED)                                                                                      | FLUA3(SEASONAL) | 14 |
| ROTAVIRUS VACCINE, LIVE, ORAL                                                                                                                | RV1             | 14 |
| JAPANESE ENCEPHALITIS VIRUS VACCINE                                                                                                          | JEV             | 12 |
| HUMAN PAPILLOVAVIRUS BIVALENT                                                                                                                | HPV2            | 11 |
| INFLUENZA VIRUS VACCINE, QUADRIVALENT, RECOMBINANT (INJECTED)                                                                                | FLUR4(SEASONAL) | 10 |
| JAPANESE ENCEPHALITIS VIRUS VACCINE, INACTIVATED, ADSORBED                                                                                   | JEV1            | 8  |
| COMVAX                                                                                                                                       | HBHEPB          | 7  |
| RUBELLA VACCINE                                                                                                                              | RUB             | 7  |
| CHOLERA VACCINE                                                                                                                              | CHOL            | 6  |
| INFLUENZA VIRUS VACCINE, TRIVALENT, CELL-CULTURE-DERIVED (INJECTED)                                                                          | FLUC3(SEASONAL) | 5  |
| DIPHTHERIA/PERTUSSIS/POLIO (ORAL [LIVE] OR INACTIVATED NOT NOTED)                                                                            | DPP             | 4  |
| INFLUENZA VIRUS VACCINE, TRIVALENT, RECOMBINANT (INJECTED)                                                                                   | FLUR3(SEASONAL) | 4  |
| MEASLES AND RUBELLA VACCINE                                                                                                                  | MER             | 4  |
| ROTAVIRUS (NO BRAND NAME)                                                                                                                    | RVX             | 4  |
| SMALLMNK                                                                                                                                     | SMALLMNK        | 4  |
| ADENOVIRUS TYPE 4 & 7 VACCINE, LIVE ORAL                                                                                                     | ADEN_4_7        | 3  |
| EBOLA ZAIRE VACCINE                                                                                                                          | EBZR            | 3  |
| MEASLES VACCINE                                                                                                                              | MEA             | 3  |
| MUMPS VIRUS VACCINE, LIVE                                                                                                                    | MU              | 3  |
| TETRAMUNE                                                                                                                                    | DTAPH           | 3  |
| DIPHTHERIA AND TETANUS TOXOIDS<br>ACELLULAR PERTUSSIS POLIOVIRUS<br>INACTIVATED HAEMOPHILUS INFLUENZA<br>B AND HEPATITIS B VACCINE (HEXAVAX) | 6VAX-F          | 2  |

|                                                                                              |        |   |
|----------------------------------------------------------------------------------------------|--------|---|
| DIPHTHERIA AND TETANUS TOXOIDS<br>PERTUSSIS AND HAEMOPHILUS<br>INFLUENZA B VACCINE (HEXAVAX) | DTPHIB | 2 |
| JAPANESE ENCEPHALITIS VIRUS VACCINE<br>(NO BRAND NAME)                                       | JEVX   | 2 |
| PNEUMOCOCCAL, 20-VALENT VACCINE<br>(PREVNAR20)                                               | PNC20  | 2 |
| BACILLUS CALMETTE-GUERIN VACCINE                                                             | BCG    | 1 |
| DENGUE TETRAVALENT VACCINE<br>(DENGVAXIA)                                                    | DF     | 1 |
| HAEMOPHILUS B POLYSACCHARIDE<br>VACCINE                                                      | HBPV   | 1 |
| MEASLES AND MUMPS VIRUS VACCINE,<br>LIVE                                                     | MM     | 1 |
| PERTUSSIS, ADSORBED VACCINE                                                                  | PER    | 1 |
| TETANUS, DIPHTHERIA AND ACELLULAR<br>PERTUSSIS, AND INACTIVATED POLIO<br>VIRUS               | TDAIPV | 1 |

**Supplementary Table 7. Literature search results from PubMed Abstract Sifter.**

| <b>Landscape View</b>                                                                                                                                                                                                                                                                                                                                                                                                                                                                                                                                                   |                                |                                        |            |                                    |                                                                                                                                                                                                                                                                                                                                                                                                                                                                                                                                                                                                                                             |                 |  |
|-------------------------------------------------------------------------------------------------------------------------------------------------------------------------------------------------------------------------------------------------------------------------------------------------------------------------------------------------------------------------------------------------------------------------------------------------------------------------------------------------------------------------------------------------------------------------|--------------------------------|----------------------------------------|------------|------------------------------------|---------------------------------------------------------------------------------------------------------------------------------------------------------------------------------------------------------------------------------------------------------------------------------------------------------------------------------------------------------------------------------------------------------------------------------------------------------------------------------------------------------------------------------------------------------------------------------------------------------------------------------------------|-----------------|--|
| <i>Subject queries:</i>                                                                                                                                                                                                                                                                                                                                                                                                                                                                                                                                                 |                                |                                        |            | <i>Summary heading</i>             |                                                                                                                                                                                                                                                                                                                                                                                                                                                                                                                                                                                                                                             |                 |  |
| Menstruation<br>Disturbances OR<br>"menstrual<br>irregularities" OR<br>"menstrual<br>abnormalities" OR<br>(heavy menstrual<br>bleeding OR<br>menstruation<br>irregular OR<br>menstrual disorder OR<br>dysmenorrhoea OR<br>intermenstrual<br>bleeding OR<br>amenorrhoea OR<br>postmenopausal<br>haemorrhage OR<br>premenstrual<br>syndrome OR<br>premenstrual pain OR<br>menstrual discomfort<br>OR menstruation<br>normal OR<br>premenstrual<br>dysphoric disorder OR<br>menstrual cycle<br>management OR<br>premenstrual<br>headache OR<br>retrograde<br>menstruation) |                                |                                        |            | menstrual cycle OR<br>menstruation | menstrual cycle<br>OR menstruation<br>OR Menstruation<br>Disturbances OR<br>"menstrual<br>irregularities" OR<br>"menstrual<br>abnormalities" OR<br>(heavy menstrual<br>bleeding OR<br>menstruation<br>bleeding OR<br>menstruation<br>irregular OR<br>menstruation<br>irregular OR<br>menstrual<br>disorder OR<br>dysmenorrhoea<br>OR intermenstrual<br>bleeding OR<br>amenorrhoea OR<br>postmenopausal<br>haemorrhage OR<br>premenstrual<br>pain OR<br>menstrual<br>discomfort OR<br>menstruation<br>normal OR<br>premenstrual<br>dysphoric disorder<br>OR menstrual<br>cycle<br>management OR<br>premenstrual<br>headache OR<br>retrograde |                 |  |
|                                                                                                                                                                                                                                                                                                                                                                                                                                                                                                                                                                         |                                |                                        |            | abn<br>menstruation                |                                                                                                                                                                                                                                                                                                                                                                                                                                                                                                                                                                                                                                             |                 |  |
| <b>id</b>                                                                                                                                                                                                                                                                                                                                                                                                                                                                                                                                                               | <b>Preferred Name</b>          | <b>Chemical / Entity query</b>         | <b>any</b> | <b>Abnormal menses</b>             | <b>Any menstruation</b>                                                                                                                                                                                                                                                                                                                                                                                                                                                                                                                                                                                                                     | <b>any plus</b> |  |
| IRF1                                                                                                                                                                                                                                                                                                                                                                                                                                                                                                                                                                    | interferon regulatory factor 1 | IRF1 OR interferon regulatory factor 1 | 3121       | 0                                  | 4                                                                                                                                                                                                                                                                                                                                                                                                                                                                                                                                                                                                                                           | 4               |  |



|       |                                                    |                                                                                           |       |   |    |    |
|-------|----------------------------------------------------|-------------------------------------------------------------------------------------------|-------|---|----|----|
| STAT1 | signal transducer and activator of transcription 1 | STAT1 OR signal transducer and activator of transcription 1                               | 11078 | 6 | 9  | 13 |
| RelA  | RELA proto-oncogene, NF-kB subunit                 | RelA OR RELA proto-oncogene, NF-kB subunit OR Transcription Factor RelA                   | 11286 | 2 | 13 | 13 |
| STAT2 | signal transducer and activator of transcription 2 | STAT2 OR signal transducer and activator of transcription 2 OR STAT2 Transcription Factor | 1390  | 0 | 1  | 1  |
| IRF3  | interferon regulatory factor 3                     | IRF3 OR interferon regulatory factor 3                                                    | 4299  | 0 | 0  | 0  |

**Landscape View**

|                         |                                                                                                                                                                                                                                                                                                                                                                                                                                                                               |                                 |                                                                                                                                                                                                                                                                                                                                                                                                                                                                         |
|-------------------------|-------------------------------------------------------------------------------------------------------------------------------------------------------------------------------------------------------------------------------------------------------------------------------------------------------------------------------------------------------------------------------------------------------------------------------------------------------------------------------|---------------------------------|-------------------------------------------------------------------------------------------------------------------------------------------------------------------------------------------------------------------------------------------------------------------------------------------------------------------------------------------------------------------------------------------------------------------------------------------------------------------------|
| <b>Subject queries:</b> | Menstruation Disturbances OR "menstrual irregularities" OR "menstrual abnormalities" OR (heavy menstrual bleeding OR menstruation irregular OR menstrual disorder OR dysmenorrhoea OR intermenstrual bleeding OR amenorrhoea OR postmenopausal haemorrhage OR premenstrual syndrome OR premenstrual pain OR menstrual discomfort OR menstruation normal OR premenstrual dysphoric disorder OR menstrual cycle management OR premenstrual headache OR retrograde menstruation) | menstrual cycle OR menstruation | menstrual cycle OR Menstruation Disturbances OR "menstrual irregularities" OR "menstrual abnormalities" OR (heavy menstrual bleeding OR menstruation irregular OR menstrual disorder OR dysmenorrhoea OR intermenstrual bleeding OR amenorrhoea OR postmenopausal haemorrhage OR premenstrual syndrome OR premenstrual pain OR menstrual discomfort OR menstruation normal OR premenstrual dysphoric disorder OR menstrual cycle management OR premenstrual headache OR |
|-------------------------|-------------------------------------------------------------------------------------------------------------------------------------------------------------------------------------------------------------------------------------------------------------------------------------------------------------------------------------------------------------------------------------------------------------------------------------------------------------------------------|---------------------------------|-------------------------------------------------------------------------------------------------------------------------------------------------------------------------------------------------------------------------------------------------------------------------------------------------------------------------------------------------------------------------------------------------------------------------------------------------------------------------|

| <b>Summary heading</b> |                                                 |                                                          |        | abn menstruation |                  |          |
|------------------------|-------------------------------------------------|----------------------------------------------------------|--------|------------------|------------------|----------|
| id                     | Preferred Name                                  | Chemical / Entity query                                  | any    | Abnormal menses  | Any menstruation | any plus |
| TNF                    | tumor necrosis factor                           | TNF OR tumor necrosis factor                             | 299917 | 141              | 333              | 421      |
| IL6R                   | interleukin 6 receptor                          | IL6R OR interleukin 6 receptor                           | 17710  | 6                | 51               | 54       |
| IL6ST                  | interleukin 6 cytokine family signal transducer | IL6ST OR interleukin 6 cytokine family signal transducer | 1558   | 1                | 12               | 12       |

|         |                                                    |                                                             |       |    |    |     |
|---------|----------------------------------------------------|-------------------------------------------------------------|-------|----|----|-----|
| LIF     | LIF interleukin 6 family cytokine                  | LIF OR LIF interleukin 6 family cytokine                    | 10794 | 11 | 98 | 101 |
| BIRC3   | baculoviral IAP repeat containing 3                | BIRC3 OR baculoviral IAP repeat containing 3                | 743   | 0  | 0  | 0   |
| FGF2    | fibroblast growth factor 2                         | FGF2 OR fibroblast growth factor 2                          | 18497 | 12 | 45 | 47  |
| ARHGDIB | Rho GDP dissociation inhibitor beta                | ARHGDIB OR Rho GDP dissociation inhibitor beta              | 266   | 0  | 0  | 0   |
| RPS3    | ribosomal protein S3                               | RPS3 OR ribosomal protein S3                                | 525   | 0  | 0  | 0   |
| RHOU    | ras homolog family member U                        | RHOU OR ras homolog family member U                         | 656   | 0  | 1  | 1   |
| MIF     | macrophage migration inhibitory factor             | MIF OR macrophage migration inhibitory factor               | 7577  | 10 | 24 | 29  |
| STAT4   | signal transducer and activator of transcription 4 | STAT4 OR signal transducer and activator of transcription 4 | 1762  | 0  | 0  | 0   |
| TEK     | TEK receptor tyrosine kinase                       | TEK OR TEK receptor tyrosine kinase                         | 3113  | 4  | 18 | 18  |
| CXCR4   | C-X-C motif chemokine receptor 4                   | CXCR4 OR C-X-C motif chemokine receptor 4                   | 15571 | 4  | 19 | 20  |

|        |                                                           |                                                                   |       |     |      |      |
|--------|-----------------------------------------------------------|-------------------------------------------------------------------|-------|-----|------|------|
| GAK    | cyclin G associated kinase                                | GAK OR cyclin G associated kinase                                 | 435   | 2   | 1    | 2    |
| ACTN1  | actinin alpha 1                                           | ACTN1 OR actinin alpha 1                                          | 2035  | 0   | 1    | 1    |
| PGR    | progesterone receptor                                     | PGR OR progesterone receptor                                      | 45560 | 796 | 1927 | 2286 |
| MFN2   | mitofusin 2                                               | MFN2 OR mitofusin 2                                               | 2204  | 0   | 0    | 0    |
| EZH2   | enhancer of zeste 2 polycomb repressive complex 2 subunit | EZH2 OR enhancer of zeste 2 polycomb repressive complex 2 subunit | 5750  | 1   | 2    | 2    |
| AXL    | AXL receptor tyrosine kinase                              | AXL OR AXL receptor tyrosine kinase                               | 2334  | 2   | 2    | 3    |
| IGFBP2 | insulin like growth factor binding protein 2              | IGFBP2 OR insulin like growth factor binding protein 2            | 2071  | 1   | 23   | 23   |
| NUB1   | negative regulator of ubiquitin like proteins 1           | NUB1 OR negative regulator of ubiquitin like proteins 1           | 382   | 0   | 0    | 0    |
| ICAM1  | intercellular adhesion molecule 1                         | ICAM1 OR intercellular adhesion molecule 1                        | 24759 | 10  | 35   | 35   |
| PSME2  | proteasome activator subunit 2                            | PSME2 OR proteasome activator subunit 2                           | 294   | 0   | 1    | 1    |

|        |                                          |                                                   |       |    |     |     |
|--------|------------------------------------------|---------------------------------------------------|-------|----|-----|-----|
| ADM    | adrenomedullin                           | ADM OR adrenomedullin                             | 31290 | 16 | 23  | 30  |
| IL1B   | interleukin 1 beta                       | IL1B OR interleukin 1 beta                        | 56099 | 43 | 109 | 128 |
| HIF1A  | hypoxia inducible factor 1 subunit alpha | HIF1A OR hypoxia inducible factor 1 subunit alpha | 17674 | 8  | 31  | 36  |
| GDI2   | GDP dissociation inhibitor 2             | GDI2 OR GDP dissociation inhibitor 2              | 674   | 0  | 0   | 0   |
| PHF19  | PHD finger protein 19                    | PHF19 OR PHD finger protein 19                    | 66    | 1  | 0   | 1   |
| CD1C   | CD1c molecule                            | CD1C OR CD1c molecule                             | 801   | 2  | 4   | 4   |
| CTSW   | cathepsin W                              | CTSW OR cathepsin W                               | 45    | 0  | 0   | 0   |
| KISS1R | KISS1 receptor                           | KISS1R OR KISS1 receptor                          | 1235  | 22 | 16  | 34  |
| DLK2   | delta like non-canonical Notch ligand 2  | DLK2 OR delta like non-canonical Notch ligand 2   | 50    | 0  | 0   | 0   |
| CCL5   | C-C motif chemokine ligand 5             | CCL5 OR C-C motif chemokine ligand 5              | 7899  | 10 | 21  | 23  |

## Landscape View Results

|                         |                                                                                                                                                                                                                                                                                                                                                                                                                                                                                                                                     |                                    |                                                                                                                                                                                                                                                                                                                                                                                                                                                                                                                                                |
|-------------------------|-------------------------------------------------------------------------------------------------------------------------------------------------------------------------------------------------------------------------------------------------------------------------------------------------------------------------------------------------------------------------------------------------------------------------------------------------------------------------------------------------------------------------------------|------------------------------------|------------------------------------------------------------------------------------------------------------------------------------------------------------------------------------------------------------------------------------------------------------------------------------------------------------------------------------------------------------------------------------------------------------------------------------------------------------------------------------------------------------------------------------------------|
| <b>Subject queries:</b> | Menstruation<br>Disturbances OR<br>"menstrual irregularities" OR<br>"menstrual abnormalities" OR<br>(heavy menstrual bleeding OR<br>menstruation irregular OR<br>menstrual disorder OR<br>dysmenorrhoea OR<br>intermenstrual bleeding OR<br>amenorrhoea OR<br>postmenopausal haemorrhage OR<br>premenstrual syndrome OR<br>premenstrual pain OR<br>menstrual discomfort OR<br>menstruation normal OR<br>premenstrual dysphoric disorder OR<br>menstrual cycle management OR<br>premenstrual headache OR<br>retrograde menstruation) | menstrual cycle OR<br>menstruation | menstrual cycle OR<br>menstruation OR<br>Disturbances OR<br>"menstrual irregularities" OR<br>"menstrual abnormalities" OR<br>(heavy menstrual bleeding OR<br>menstruation irregular OR<br>menstrual disorder OR<br>dysmenorrhoea OR<br>intermenstrual bleeding OR<br>amenorrhoea OR<br>postmenopausal haemorrhage OR<br>premenstrual syndrome OR<br>premenstrual pain OR<br>menstrual discomfort OR<br>menstruation normal OR<br>premenstrual dysphoric disorder OR<br>menstrual cycle management OR<br>premenstrual headache OR<br>retrograde |
|-------------------------|-------------------------------------------------------------------------------------------------------------------------------------------------------------------------------------------------------------------------------------------------------------------------------------------------------------------------------------------------------------------------------------------------------------------------------------------------------------------------------------------------------------------------------------|------------------------------------|------------------------------------------------------------------------------------------------------------------------------------------------------------------------------------------------------------------------------------------------------------------------------------------------------------------------------------------------------------------------------------------------------------------------------------------------------------------------------------------------------------------------------------------------|

| <b>Summary heading</b> |                                      |                                               | abn menstruation |                 |                  |          |
|------------------------|--------------------------------------|-----------------------------------------------|------------------|-----------------|------------------|----------|
| id                     | Preferred Name                       | Chemical / Entity query                       | any              | Abnormal menses | Any menstruation | any plus |
| TNF                    | tumor necrosis factor                | TNF OR tumor necrosis factor                  | 299917           | 141             | 333              | 421      |
| VEGFA                  | vascular endothelial growth factor A | VEGFA OR vascular endothelial growth factor A | 60492            | 84              | 281              | 319      |
| IL1B                   | interleukin 1 beta                   | IL1B OR interleukin 1 beta                    | 56093            | 43              | 109              | 128      |
| CASP3                  | caspase 3                            | CASP3 OR caspase 3                            | 79456            | 19              | 53               | 64       |

|       |                                                  |                                                           |       |    |    |    |
|-------|--------------------------------------------------|-----------------------------------------------------------|-------|----|----|----|
| IL6R  | interleukin 6 receptor                           | IL6R OR interleukin 6 receptor                            | 17707 | 6  | 51 | 54 |
| NOS2  | nitric oxide synthase 2                          | NOS2 OR nitric oxide synthase 2                           | 55806 | 31 | 49 | 71 |
| CDH1  | cadherin 1                                       | CDH1 OR cadherin 1                                        | 28976 | 16 | 47 | 51 |
| TERT  | telomerase reverse transcriptase                 | TERT OR telomerase reverse transcriptase                  | 52555 | 11 | 41 | 45 |
| CCL2  | C-C motif chemokine ligand 2                     | CCL2 OR C-C motif chemokine ligand 2                      | 19554 | 13 | 41 | 44 |
| MIF   | macrophage migration inhibitory factor           | MIF OR macrophage migration inhibitory factor             | 7577  | 10 | 24 | 29 |
| FLT1  | fms related receptor tyrosine kinase 1           | FLT1 OR fms related receptor tyrosine kinase 1            | 2774  | 2  | 17 | 17 |
| PPARA | peroxisome proliferator activated receptor alpha | PPARA OR peroxisome proliferator activated receptor alpha | 20505 | 2  | 8  | 9  |
| AKT1  | AKT serine/threonine kinase 1                    | AKT1 OR AKT serine/threonine kinase 1                     | 11251 | 4  | 8  | 10 |
| CREB1 | cAMP responsive element binding protein 1        | CREB1 OR cAMP responsive element binding protein 1        | 8688  | 1  | 7  | 8  |

|        |                                            |                                                     |       |   |   |   |
|--------|--------------------------------------------|-----------------------------------------------------|-------|---|---|---|
| DRD1   | dopamine receptor D1                       | DRD1 OR dopamine receptor D1                        | 13266 | 3 | 5 | 6 |
| E2F1   | E2F transcription factor 1                 | E2F1 OR E2F transcription factor 1                  | 6463  | 0 | 5 | 5 |
| BMPR2  | bone morphogenetic protein receptor type 2 | BMPR2 OR bone morphogenetic protein receptor type 2 | 3247  | 4 | 3 | 7 |
| PARP1  | poly(ADP-ribose) polymerase 1              | PARP1 OR poly(ADP-ribose) polymerase 1              | 13191 | 2 | 3 | 4 |
| NFE2L2 | NFE2 like bZIP transcription factor 2      | NFE2L2 OR NFE2 like bZIP transcription factor 2     | 9260  | 1 | 2 | 2 |
| S100A6 | S100 calcium binding protein A6            | S100A6 OR S100 calcium binding protein A6           | 599   | 0 | 2 | 2 |
| MX2    | MX dynamin like GTPase 2                   | MX2 OR MX dynamin like GTPase 2                     | 902   | 0 | 2 | 2 |
| TXNIP  | thioredoxin interacting protein            | TXNIP OR thioredoxin interacting protein            | 1840  | 1 | 1 | 2 |
| GNAS   | GNAS complex locus                         | GNAS OR GNAS complex locus                          | 1730  | 3 | 1 | 4 |
| GNAI2  | G protein subunit alpha i2                 | GNAI2 OR G protein subunit alpha i2                 | 627   | 0 | 1 | 1 |



|          |                                               |                                                      |      |   |   |   |
|----------|-----------------------------------------------|------------------------------------------------------|------|---|---|---|
| TPT1     | tumor protein, translational ly-controlled 1  | TPT1 OR tumor protein, translational ly-controlled 1 | 770  | 0 | 1 | 1 |
| MIR576   | microRNA 576                                  | MIR576 OR microRNA 576                               | 150  | 0 | 1 | 1 |
| FTO      | FTO alpha-ketoglutarate dependent dioxygenase | FTO OR FTO alpha-ketoglutarate dependent dioxygenase | 4000 | 2 | 1 | 2 |
| CD274    | CD274 molecule                                | CD274 OR CD274 molecule                              | 8284 | 0 | 1 | 1 |
| MAPK14   | mitogen-activated protein kinase 14           | MAPK14 OR mitogen-activated protein kinase 14        | 1373 | 1 | 0 | 1 |
| MIR516A2 | microRNA 516a-2                               | MIR516A2 OR microRNA 516a-2                          | 2    | 0 | 0 | 0 |
| MIR516A1 | microRNA 516a-1                               | MIR516A1 OR microRNA 516a-1                          | 1    | 0 | 0 | 0 |
| MIR488   | microRNA 488                                  | MIR488 OR microRNA 488                               | 229  | 0 | 0 | 0 |
| AHSG     | alpha 2-HS glycoprotein                       | AHSG OR alpha 2-HS glycoprotein                      | 1408 | 0 | 0 | 0 |
| IFI44    | interferon induced protein 44                 | IFI44 OR interferon induced protein 44               | 1374 | 0 | 0 | 0 |
| SERPINF2 | serpin family F member 2                      | SERPINF2 OR serpin family F member 2                 | 55   | 0 | 0 | 0 |

**Supplementary Table 8. Differentially expressed genes in response to treatment with COVID-19 vaccine BNT162b2.**

| <b>Gene</b> | <b>Log2FC</b> | <b>FDR</b> |
|-------------|---------------|------------|
| IDO1        | 8.44          | 1.26E-05   |
| LAMP3       | 8.36          | 1.26E-05   |
| CCR5AS      | 8.20          | 5.35E-05   |
| TNFAIP6     | 7.91          | 7.82E-05   |
| CXCL10      | 7.15          | 4.46E-05   |
| CCRL2       | 7.02          | 9.17E-05   |
| GRIN3A      | 6.98          | 1.75E-04   |
| RSPH9       | 6.60          | 1.88E-05   |
| CCL2        | 6.55          | 2.11E-04   |
| MDK         | 6.49          | 3.35E-04   |
| OAS2        | 6.37          | 3.39E-04   |
| SEPTIN4     | 6.35          | 3.55E-04   |
| SOCS1       | 6.31          | 3.87E-04   |
| IFIT5       | 6.28          | 3.39E-04   |
| USP18       | 6.20          | 4.32E-04   |
| P2RY14      | 6.14          | 3.77E-04   |
| PDCD1LG2    | 6.08          | 2.73E-04   |
| MSR1        | 5.92          | 6.35E-04   |
| EFCAB2      | 5.91          | 6.38E-04   |
| DDX58       | 5.90          | 6.11E-04   |
| APOL4       | 5.86          | 1.74E-04   |
| ANKRD22     | 5.77          | 1.75E-04   |
| CD274       | 5.75          | 5.03E-04   |
| DDX60       | 5.75          | 6.65E-04   |
| GBP1P1      | 5.74          | 1.49E-04   |
| RSAD2       | 5.72          | 3.39E-04   |
| TOR1B       | 5.71          | 5.53E-05   |
| NCOA7       | 5.70          | 1.80E-06   |
| TNFSF10     | 5.68          | 6.82E-04   |
| PLSCR1      | 5.67          | 8.33E-04   |
| CMPK2       | 5.66          | 6.80E-04   |
| RTP4        | 5.62          | 7.83E-04   |
| CALHM6      | 5.61          | 7.14E-04   |
| ATF3        | 5.53          | 5.96E-04   |
| DHX58       | 5.50          | 7.66E-04   |
| H4C8        | 5.43          | 5.35E-05   |
| TIFA        | 5.35          | 9.40E-04   |
| GCH1        | 5.34          | 9.35E-04   |
| HERC5       | 5.32          | 1.16E-03   |
| RGL1        | 5.27          | 3.89E-04   |
| TMEM268     | 5.27          | 3.34E-04   |

|          |      |          |
|----------|------|----------|
| CLEC6A   | 5.24 | 1.34E-03 |
| AIM2     | 5.22 | 1.23E-03 |
| IFITM3P2 | 5.21 | 7.49E-04 |
| GBP6     | 5.18 | 9.38E-04 |
| TDRD7    | 5.18 | 5.64E-04 |
| IFIT1    | 5.17 | 1.34E-03 |
| RMI2     | 5.15 | 1.22E-03 |
| MOV10    | 5.15 | 4.93E-04 |
| IFIH1    | 5.13 | 1.29E-03 |
| TRIM22   | 5.11 | 1.46E-03 |
| CEACAM1  | 5.11 | 1.55E-03 |
| ISG15    | 5.09 | 1.38E-03 |
| TFEC     | 5.08 | 1.13E-03 |
| OASL     | 5.02 | 1.85E-03 |
| PNPT1    | 5.00 | 6.09E-05 |
| IFIT3    | 5.00 | 1.77E-03 |
| IFIT2    | 4.97 | 1.96E-03 |
| SAT1     | 4.93 | 3.34E-04 |
| GAS6     | 4.92 | 3.39E-04 |
| FAS      | 4.91 | 1.75E-03 |
| OAS1     | 4.90 | 2.15E-03 |
| LHFPL2   | 4.87 | 2.10E-03 |
| IFI44L   | 4.86 | 1.59E-03 |
| MX1      | 4.84 | 2.30E-03 |
| TRIM6    | 4.84 | 2.30E-03 |
| MRPL44   | 4.84 | 2.65E-04 |
| SMTNL1   | 4.83 | 2.30E-03 |
| DDX60L   | 4.79 | 1.28E-03 |
| KIAA1958 | 4.79 | 3.89E-04 |
| IFITM3   | 4.76 | 2.55E-03 |
| GALM     | 4.76 | 1.91E-04 |
| TMEM252  | 4.74 | 1.22E-03 |
| GBP5     | 4.72 | 2.25E-03 |
| IL1RN    | 4.72 | 5.12E-04 |
| VAMP5    | 4.71 | 2.56E-03 |
| MICB     | 4.71 | 7.49E-04 |
| SPATS2L  | 4.67 | 2.30E-03 |
| OAS3     | 4.67 | 2.50E-03 |
| SERPING1 | 4.66 | 1.59E-03 |
| SAMD9    | 4.66 | 8.14E-04 |
| SAMD9L   | 4.65 | 2.77E-03 |
| STAT2    | 4.65 | 2.42E-03 |
| EIF2AK2  | 4.64 | 2.11E-03 |
| PARP12   | 4.63 | 1.54E-03 |
| HORMAD1  | 4.62 | 2.13E-03 |

|          |      |          |
|----------|------|----------|
| LAP3     | 4.61 | 2.91E-03 |
| G0S2     | 4.58 | 2.17E-03 |
| CARD17   | 4.56 | 3.02E-03 |
| IFI6     | 4.55 | 3.17E-03 |
| FBXO6    | 4.55 | 3.06E-03 |
| STK3     | 4.55 | 2.23E-03 |
| TNFSF13B | 4.55 | 2.30E-03 |
| IFI44    | 4.54 | 3.25E-03 |
| CD38     | 4.54 | 3.04E-04 |
| WDFY1    | 4.53 | 8.98E-04 |
| PARP11   | 4.52 | 1.09E-04 |
| WARS1    | 4.48 | 3.45E-03 |
| TMEM123  | 4.47 | 2.90E-04 |
| IRF7     | 4.46 | 3.17E-03 |
| ZBP1     | 4.43 | 2.42E-03 |
| XAF1     | 4.41 | 3.87E-03 |
| TANK     | 4.35 | 1.18E-04 |
| EPSTI1   | 4.35 | 4.24E-03 |
| TRIM5    | 4.33 | 2.30E-03 |
| DAPP1    | 4.33 | 1.11E-03 |
| PARP9    | 4.32 | 3.81E-03 |
| GRAMD1B  | 4.32 | 2.22E-03 |
| IRAK2    | 4.31 | 5.12E-04 |
| BISPR    | 4.31 | 1.82E-03 |
| MASTL    | 4.30 | 5.78E-04 |
| CCL8     | 4.29 | 1.11E-03 |
| GBP1     | 4.26 | 3.98E-03 |
| ISG20    | 4.26 | 2.68E-03 |
| MX2      | 4.26 | 8.33E-04 |
| IFI16    | 4.25 | 2.36E-03 |
| CHMP5    | 4.25 | 3.68E-03 |
| CLEC5A   | 4.24 | 1.54E-03 |
| METTL7B  | 4.20 | 4.45E-03 |
| FCGR1CP  | 4.20 | 3.21E-03 |
| GK       | 4.18 | 4.89E-03 |
| DDIAS    | 4.17 | 2.41E-03 |
| APOBEC3F | 4.13 | 1.56E-04 |
| RIPK2    | 4.13 | 2.55E-03 |
| SCARF1   | 4.11 | 6.06E-03 |
| NBN      | 4.10 | 1.43E-04 |
| LYSMD2   | 4.10 | 1.02E-03 |
| CMTR1    | 4.10 | 2.42E-03 |
| BCL2L14  | 4.08 | 3.55E-03 |
| DYNLT1   | 4.08 | 2.42E-03 |
| IFI27    | 4.06 | 5.28E-03 |

|          |      |          |
|----------|------|----------|
| GPR84    | 4.06 | 6.21E-03 |
| PPP1R2P1 | 4.05 | 4.45E-03 |
| DOCK4    | 4.03 | 6.00E-03 |
| PML      | 4.02 | 6.41E-03 |
| PHF11    | 4.02 | 6.44E-04 |
| STAT1    | 4.01 | 6.76E-03 |
| STX11    | 4.01 | 5.10E-03 |
| XRN1     | 4.00 | 4.16E-03 |
| HNRNPLL  | 3.99 | 6.09E-05 |
| MFSD14B  | 3.98 | 2.17E-03 |
| PARP14   | 3.94 | 7.79E-03 |
| HCAR3    | 3.93 | 6.25E-03 |
| LPCAT2   | 3.91 | 7.08E-03 |
| BATF2    | 3.91 | 5.04E-03 |
| GADD45B  | 3.90 | 3.21E-03 |
| KLF5     | 3.89 | 7.56E-03 |
| VAMP3    | 3.89 | 1.11E-03 |
| ASPRV1   | 3.88 | 3.46E-03 |
| ALMS1P1  | 3.88 | 4.40E-03 |
| UBE2L6   | 3.86 | 8.54E-03 |
| LACTB    | 3.86 | 4.45E-03 |
| EXOC3L1  | 3.86 | 8.56E-03 |
| CD300LD  | 3.86 | 8.43E-03 |
| STOM     | 3.85 | 8.94E-04 |
| VCIPI1   | 3.84 | 2.73E-03 |
| SAMD4A   | 3.84 | 8.86E-03 |
| SCML1    | 3.84 | 3.35E-04 |
| IFITM1   | 3.84 | 5.04E-03 |
| POLB     | 3.84 | 2.85E-03 |
| H2BC21   | 3.84 | 2.74E-04 |
| GALNT3   | 3.83 | 1.20E-03 |
| ANKFY1   | 3.83 | 1.25E-03 |
| TAP1     | 3.83 | 7.88E-03 |
| ETV7     | 3.83 | 4.65E-03 |
| KPTN     | 3.82 | 3.66E-03 |
| GM2A     | 3.81 | 1.87E-03 |
| GBP4     | 3.81 | 9.08E-03 |
| IFI35    | 3.81 | 9.55E-03 |
| ASPHD2   | 3.81 | 4.53E-03 |
| CD59     | 3.78 | 3.80E-03 |
| AIG1     | 3.78 | 3.35E-04 |
| NUB1     | 3.77 | 3.21E-03 |
| H2BP2    | 3.76 | 3.18E-03 |
| LYRM1    | 3.75 | 5.12E-04 |
| APOBEC3B | 3.75 | 1.01E-02 |

|          |      |          |
|----------|------|----------|
| APOL6    | 3.75 | 1.02E-02 |
| RUFY4    | 3.74 | 1.05E-02 |
| RAB33B   | 3.74 | 3.21E-03 |
| TASL     | 3.74 | 1.22E-03 |
| SLC26A8  | 3.72 | 7.36E-03 |
| CSRNP1   | 3.71 | 2.30E-03 |
| FANCA    | 3.70 | 6.37E-03 |
| H2BC4    | 3.70 | 1.01E-03 |
| NRIR     | 3.70 | 6.95E-03 |
| ICAM1    | 3.70 | 9.08E-03 |
| H3C6     | 3.70 | 5.42E-03 |
| EPB41L5  | 3.68 | 4.65E-03 |
| MMP8     | 3.68 | 1.15E-02 |
| RBCK1    | 3.68 | 5.59E-03 |
| RASGRP3  | 3.67 | 4.93E-04 |
| SLAMF8   | 3.67 | 1.17E-02 |
| ATG3     | 3.66 | 2.80E-03 |
| APOBEC3A | 3.66 | 1.05E-02 |
| RALB     | 3.66 | 4.06E-03 |
| SP140    | 3.66 | 4.00E-03 |
| APOL1    | 3.65 | 1.17E-02 |
| PSTPIP2  | 3.65 | 1.14E-02 |
| DTX3L    | 3.65 | 7.96E-03 |
| SP100    | 3.65 | 3.87E-04 |
| NCF1B    | 3.64 | 3.75E-03 |
| ARL5B    | 3.63 | 1.01E-03 |
| PRRG4    | 3.63 | 9.56E-03 |
| CNDP2    | 3.63 | 2.95E-03 |
| SOD2     | 3.62 | 8.07E-03 |
| SELL     | 3.62 | 3.41E-03 |
| MR1      | 3.62 | 6.38E-04 |
| PLAAT4   | 3.61 | 8.86E-03 |
| CREG1    | 3.61 | 4.07E-03 |
| USP25    | 3.60 | 3.47E-04 |
| SRGAP2C  | 3.60 | 4.48E-04 |
| SRBD1    | 3.59 | 1.19E-04 |
| SQOR     | 3.57 | 3.80E-03 |
| SAMHD1   | 3.57 | 2.14E-03 |
| BLZF1    | 3.56 | 1.75E-04 |
| SEC24D   | 3.56 | 3.14E-03 |
| FCGR1A   | 3.56 | 9.56E-03 |
| GBP3     | 3.56 | 8.53E-03 |
| MTHFD2   | 3.55 | 3.55E-03 |
| MIA3     | 3.55 | 9.34E-04 |
| TENT5A   | 3.55 | 1.21E-03 |

|          |      |          |
|----------|------|----------|
| TRIM69   | 3.55 | 1.96E-03 |
| PI4K2B   | 3.53 | 3.87E-03 |
| ZNF200   | 3.49 | 2.30E-03 |
| C1GALT1  | 3.48 | 1.01E-03 |
| IL27     | 3.47 | 1.61E-02 |
| CALCOCO2 | 3.46 | 2.73E-03 |
| UBE2S    | 3.46 | 3.23E-03 |
| ERAP2    | 3.45 | 3.05E-03 |
| NCF1C    | 3.44 | 6.86E-03 |
| CASP4    | 3.44 | 4.18E-03 |
| TTC21A   | 3.44 | 2.06E-03 |
| IL15RA   | 3.44 | 5.60E-03 |
| SIRPD    | 3.43 | 6.23E-03 |
| HCAR2    | 3.43 | 1.14E-02 |
| PSME2P2  | 3.43 | 1.50E-02 |
| PSME2    | 3.42 | 1.48E-02 |
| CASP1    | 3.42 | 4.32E-03 |
| C3AR1    | 3.42 | 4.06E-03 |
| SMCO4    | 3.42 | 1.38E-02 |
| SNX10    | 3.42 | 4.80E-03 |
| CCR1     | 3.42 | 5.58E-03 |
| TRAFD1   | 3.41 | 1.45E-02 |
| B3GNT5   | 3.41 | 4.25E-03 |
| ZC3HAV1  | 3.41 | 1.53E-03 |
| PEL1     | 3.39 | 3.58E-03 |
| PIK3AP1  | 3.38 | 7.70E-03 |
| ODF3B    | 3.37 | 1.42E-02 |
| CASP5    | 3.37 | 1.91E-02 |
| RHBDF2   | 3.37 | 1.48E-02 |
| SLAMF7   | 3.36 | 2.77E-03 |
| PLAUR    | 3.36 | 5.13E-03 |
| SORT1    | 3.36 | 1.63E-02 |
| DCUN1D3  | 3.36 | 6.37E-03 |
| GNB4     | 3.36 | 5.29E-03 |
| MYOF     | 3.35 | 1.98E-02 |
| CD40     | 3.35 | 3.98E-03 |
| TRIM38   | 3.34 | 1.04E-03 |
| PSME2P6  | 3.33 | 2.01E-02 |
| C3orf14  | 3.33 | 5.46E-03 |
| SCARB2   | 3.33 | 8.18E-04 |
| ACTA2    | 3.33 | 9.99E-03 |
| FCGR1B   | 3.32 | 1.91E-02 |
| VRK2     | 3.32 | 4.06E-03 |
| SECTM1   | 3.32 | 2.10E-02 |
| TMEM140  | 3.31 | 1.31E-02 |

|          |      |          |
|----------|------|----------|
| PLAC8    | 3.30 | 8.33E-04 |
| KCNJ15   | 3.30 | 1.46E-02 |
| H4C14    | 3.29 | 4.37E-03 |
| CD46     | 3.29 | 2.51E-03 |
| PDE4B    | 3.28 | 4.16E-03 |
| DISC1    | 3.28 | 4.48E-03 |
| FCGR3B   | 3.28 | 5.07E-03 |
| SRGAP2B  | 3.28 | 3.66E-03 |
| C9orf72  | 3.28 | 6.97E-03 |
| CDK17    | 3.27 | 1.02E-03 |
| GPD2     | 3.27 | 3.31E-03 |
| JAK2     | 3.26 | 6.95E-03 |
| ZCCHC2   | 3.26 | 1.36E-02 |
| MAD2L1BP | 3.26 | 5.85E-05 |
| FGL2     | 3.25 | 4.50E-03 |
| ZNF684   | 3.25 | 4.50E-03 |
| TAP2     | 3.24 | 1.42E-02 |
| FLVCR2   | 3.24 | 1.04E-02 |
| C5orf15  | 3.24 | 3.55E-03 |
| KIAA0040 | 3.24 | 5.46E-03 |
| FCGR2B   | 3.23 | 1.30E-03 |
| IRF2     | 3.23 | 2.95E-03 |
| HES4     | 3.22 | 1.99E-02 |
| C2       | 3.21 | 2.51E-02 |
| IGFLR1   | 3.21 | 1.02E-02 |
| LGALS3BP | 3.21 | 1.46E-02 |
| HERC6    | 3.20 | 5.17E-03 |
| LMO2     | 3.20 | 3.51E-03 |
| KARS1    | 3.20 | 5.76E-03 |
| PPA1     | 3.20 | 1.72E-03 |
| AFF1     | 3.19 | 1.03E-02 |
| FAR2     | 3.19 | 3.51E-03 |
| DUSP3    | 3.19 | 5.05E-03 |
| RUBCN    | 3.19 | 1.87E-03 |
| ERP44    | 3.19 | 1.30E-03 |
| PIM2     | 3.18 | 4.74E-03 |
| CYB5R4   | 3.18 | 1.61E-03 |
| H2BC18   | 3.18 | 1.18E-02 |
| SLC6A12  | 3.17 | 2.46E-02 |
| PRPS2    | 3.17 | 2.51E-03 |
| ADAR     | 3.16 | 6.37E-03 |
| ERI1     | 3.16 | 2.68E-03 |
| PSME2P1  | 3.16 | 2.69E-02 |
| ACOT9    | 3.15 | 7.66E-04 |
| SPPL2A   | 3.14 | 6.65E-04 |



|          |      |          |
|----------|------|----------|
| BAZ1A    | 3.14 | 7.46E-03 |
| ADM      | 3.14 | 7.11E-03 |
| CASP10   | 3.14 | 3.47E-04 |
| PLA2G7   | 3.14 | 9.86E-03 |
| IRF1     | 3.13 | 2.01E-02 |
| EIF4E3   | 3.13 | 1.43E-03 |
| SESTD1   | 3.13 | 4.10E-03 |
| ACO1     | 3.12 | 6.25E-03 |
| HSH2D    | 3.12 | 4.07E-03 |
| C18orf25 | 3.12 | 8.35E-03 |
| ELOVL5   | 3.11 | 5.90E-03 |
| FRMD3    | 3.11 | 2.48E-02 |
| P2RY6    | 3.10 | 1.93E-02 |
| NPC2     | 3.10 | 1.34E-02 |
| GLRX     | 3.10 | 9.08E-03 |
| LONRF1   | 3.09 | 4.57E-03 |
| ARFIP1   | 3.09 | 2.06E-03 |
| DRAM1    | 3.09 | 3.70E-03 |
| TNF      | 3.07 | 2.57E-03 |
| ANXA3    | 3.07 | 2.86E-02 |
| VPS9D1   | 3.07 | 2.87E-02 |
| PLA2G4A  | 3.06 | 1.42E-02 |
| TCN2     | 3.06 | 2.69E-02 |
| PATL1    | 3.06 | 2.98E-03 |
| DPYD     | 3.06 | 2.17E-03 |
| ALPK1    | 3.05 | 1.10E-02 |
| SCO2     | 3.05 | 2.59E-02 |
| B2M      | 3.05 | 4.96E-03 |
| MLKL     | 3.04 | 1.25E-02 |
| NOD2     | 3.04 | 2.50E-02 |
| STX3     | 3.04 | 3.79E-03 |
| ZNF366   | 3.04 | 2.81E-02 |
| KCNK13   | 3.04 | 1.42E-02 |
| ITPRID2  | 3.04 | 9.34E-03 |
| ARSB     | 3.03 | 2.77E-03 |
| PLEK     | 3.03 | 8.00E-03 |
| SHISA5   | 3.03 | 1.03E-02 |
| DHRS9    | 3.03 | 2.12E-02 |
| GNS      | 3.02 | 7.74E-03 |
| DHRS12   | 3.02 | 1.41E-02 |
| TESK2    | 3.02 | 1.51E-02 |
| RGS1     | 3.02 | 3.51E-02 |
| MTMR11   | 3.02 | 4.50E-03 |
| SNX20    | 3.02 | 8.90E-03 |
| LRRK2    | 3.01 | 9.52E-03 |

|           |      |          |
|-----------|------|----------|
| C1QB      | 3.01 | 3.59E-02 |
| HAPLN3    | 3.01 | 6.09E-03 |
| SETP11    | 3.01 | 3.46E-02 |
| APOBEC3G  | 3.01 | 2.15E-03 |
| GBP2      | 3.01 | 3.08E-02 |
| CARD16    | 2.99 | 1.81E-02 |
| P2RY12    | 2.99 | 2.62E-02 |
| ADCY3     | 2.99 | 2.76E-03 |
| CFAP58    | 2.98 | 2.98E-02 |
| ZNF117    | 2.98 | 1.63E-02 |
| UNC93B1   | 2.98 | 5.58E-03 |
| KIAA0319L | 2.97 | 6.38E-04 |
| MOB1A     | 2.97 | 9.38E-04 |
| OSM       | 2.97 | 1.05E-02 |
| USP6NL    | 2.97 | 3.73E-03 |
| PSME1     | 2.97 | 1.40E-02 |
| HINT3     | 2.96 | 2.30E-03 |
| NMI       | 2.96 | 1.71E-02 |
| TRPV4     | 2.96 | 3.88E-02 |
| SHFL      | 2.96 | 1.84E-03 |
| CLIC4     | 2.95 | 5.76E-03 |
| GTF2B     | 2.95 | 6.75E-04 |
| MAFF      | 2.95 | 2.84E-02 |
| MT2A      | 2.94 | 3.51E-02 |
| GRASLND   | 2.93 | 3.34E-02 |
| CD2AP     | 2.93 | 6.95E-03 |
| KIF23     | 2.92 | 2.15E-02 |
| TRIM21    | 2.92 | 2.16E-02 |
| FFAR2     | 2.92 | 1.59E-02 |
| MCTP1     | 2.91 | 1.94E-03 |
| ACSL4     | 2.91 | 1.50E-02 |
| CAPZA2    | 2.91 | 1.01E-02 |
| TLR7      | 2.91 | 1.65E-02 |
| C3orf38   | 2.90 | 5.78E-03 |
| WSB2      | 2.90 | 5.59E-03 |
| ZNF496    | 2.90 | 3.41E-03 |
| ZNF702P   | 2.90 | 3.38E-02 |
| FGF13     | 2.90 | 4.38E-02 |
| PANK2     | 2.89 | 1.15E-03 |
| ZNF267    | 2.89 | 2.03E-02 |
| STN1      | 2.89 | 1.68E-02 |
| BST2      | 2.88 | 3.21E-02 |
| NRN1      | 2.88 | 3.21E-02 |
| SHOX2     | 2.87 | 4.50E-02 |
| AZI2      | 2.87 | 5.03E-04 |

|           |      |          |
|-----------|------|----------|
| PSMB8     | 2.87 | 1.85E-02 |
| CYBB      | 2.87 | 2.12E-02 |
| GOLM1     | 2.87 | 7.36E-03 |
| NCF1      | 2.87 | 3.46E-02 |
| GIMAP2    | 2.86 | 1.58E-02 |
| GPR65     | 2.86 | 8.86E-03 |
| ATP6V1G1  | 2.86 | 4.79E-03 |
| FYTTD1    | 2.86 | 1.23E-03 |
| CAMK2D    | 2.86 | 2.11E-03 |
| CEP162    | 2.86 | 4.73E-03 |
| CLEC7A    | 2.85 | 4.24E-03 |
| SRGN      | 2.85 | 4.85E-03 |
| HELZ2     | 2.85 | 3.24E-02 |
| SLC31A2   | 2.85 | 8.72E-03 |
| NUCB1     | 2.85 | 3.21E-02 |
| MBOAT2    | 2.84 | 1.30E-02 |
| CASP7     | 2.83 | 2.01E-02 |
| ITPRIPL2  | 2.83 | 2.60E-02 |
| PRR11     | 2.83 | 1.52E-02 |
| H3P14     | 2.83 | 3.10E-02 |
| TMEM60    | 2.83 | 1.39E-03 |
| SLK       | 2.82 | 1.46E-02 |
| TAGAP     | 2.82 | 8.56E-03 |
| GIMAP4    | 2.82 | 5.28E-03 |
| NUDT16L2P | 2.81 | 1.70E-02 |
| ATP1B2    | 2.81 | 3.42E-02 |
| TOR1A     | 2.81 | 6.38E-04 |
| DUSP5     | 2.81 | 2.81E-02 |
| CD53      | 2.81 | 4.80E-03 |
| RBM7      | 2.81 | 7.85E-04 |
| PSMA4     | 2.81 | 2.40E-02 |
| ZDHHC19   | 2.80 | 4.61E-02 |
| IL31RA    | 2.80 | 3.81E-02 |
| EIF4G3    | 2.80 | 1.62E-02 |
| SMIM14    | 2.80 | 1.55E-04 |
| ZNF438    | 2.80 | 1.63E-02 |
| CXCL9     | 2.79 | 2.97E-02 |
| NFIL3     | 2.78 | 3.63E-03 |
| MICALL1   | 2.78 | 6.37E-03 |
| CD36      | 2.78 | 1.03E-02 |
| UBE2D1    | 2.78 | 1.22E-02 |
| TLR8      | 2.78 | 1.42E-02 |
| LY6E      | 2.77 | 4.65E-02 |
| ZNFX1     | 2.77 | 2.19E-02 |
| RHOT1     | 2.77 | 3.41E-03 |

|           |      |          |
|-----------|------|----------|
| SNX6      | 2.77 | 2.90E-04 |
| NLRC5     | 2.77 | 1.91E-02 |
| CNP       | 2.77 | 6.75E-04 |
| CCL4L2    | 2.77 | 2.22E-02 |
| RAB20     | 2.77 | 4.54E-02 |
| APOL2     | 2.76 | 4.73E-02 |
| IL1B      | 2.76 | 1.10E-02 |
| DUSP6     | 2.76 | 6.78E-03 |
| CBWD2     | 2.75 | 1.10E-02 |
| C5        | 2.75 | 4.14E-02 |
| IL15      | 2.74 | 2.86E-02 |
| SP110     | 2.74 | 1.52E-02 |
| MAT2B     | 2.74 | 1.63E-02 |
| RICTOR    | 2.74 | 2.82E-03 |
| TAPBP     | 2.73 | 3.14E-03 |
| C1GALT1C1 | 2.73 | 1.80E-02 |
| SUCNR1    | 2.73 | 5.22E-02 |
| CXCL16    | 2.73 | 3.57E-02 |
| RAB8B     | 2.73 | 2.52E-03 |
| SLC22A4   | 2.73 | 3.79E-03 |
| CLEC4E    | 2.72 | 1.80E-02 |
| CGAS      | 2.72 | 1.17E-02 |
| CACNA1A   | 2.71 | 4.88E-02 |
| KYNU      | 2.71 | 1.36E-02 |
| CCDC13    | 2.71 | 2.43E-02 |
| ARMH1     | 2.70 | 3.41E-03 |
| ABHD16A   | 2.70 | 4.32E-03 |
| PSMB9     | 2.70 | 4.43E-02 |
| CYRIB     | 2.70 | 1.96E-03 |
| FYB1      | 2.69 | 1.71E-02 |
| LYPLA1    | 2.69 | 1.67E-03 |
| COQ10B    | 2.69 | 6.10E-03 |
| SLC22A15  | 2.69 | 1.13E-02 |
| RRM2B     | 2.69 | 9.97E-03 |
| MYD88     | 2.68 | 1.59E-02 |
| FOLR2     | 2.68 | 2.96E-02 |
| SRGAP2    | 2.68 | 1.01E-02 |
| CPEB2     | 2.68 | 3.23E-03 |
| BTN3A1    | 2.68 | 5.72E-03 |
| EFR3A     | 2.68 | 1.12E-03 |
| SSB       | 2.68 | 3.82E-03 |
| RP2       | 2.67 | 1.78E-02 |
| LMNB1     | 2.67 | 3.72E-02 |
| TLDC2     | 2.66 | 3.88E-02 |
| N4BP2L1   | 2.66 | 2.42E-03 |

|          |      |          |
|----------|------|----------|
| MAN1A1   | 2.66 | 9.97E-03 |
| PARP10   | 2.66 | 3.62E-02 |
| PMAIP1   | 2.65 | 1.36E-02 |
| CMAHP    | 2.65 | 1.21E-02 |
| CBWD3    | 2.65 | 3.65E-02 |
| ECE1     | 2.65 | 5.04E-03 |
| SCIMP    | 2.65 | 1.39E-02 |
| LYN      | 2.65 | 1.20E-02 |
| GTPBP1   | 2.65 | 1.30E-02 |
| MITD1    | 2.64 | 1.34E-02 |
| IL18BP   | 2.64 | 9.72E-03 |
| SIPA1L1  | 2.63 | 3.08E-02 |
| CD164    | 2.63 | 7.79E-03 |
| H3P6     | 2.62 | 1.37E-02 |
| UBE2D3   | 2.61 | 1.01E-03 |
| RAB24    | 2.61 | 1.53E-02 |
| TNFAIP3  | 2.60 | 3.87E-03 |
| N4BP1    | 2.60 | 1.72E-03 |
| USP30    | 2.60 | 7.96E-03 |
| ITM2B    | 2.59 | 5.46E-03 |
| CTSS     | 2.59 | 3.58E-03 |
| PRKAG2   | 2.59 | 3.06E-04 |
| C12orf4  | 2.59 | 2.83E-02 |
| LGALS9   | 2.58 | 4.62E-02 |
| FIG4     | 2.58 | 4.45E-03 |
| EDEM2    | 2.58 | 8.27E-03 |
| BTN2A2   | 2.58 | 9.35E-03 |
| RAB5A    | 2.58 | 4.89E-03 |
| SMCHD1   | 2.58 | 1.40E-02 |
| PUS3     | 2.58 | 1.27E-02 |
| CAPZA1   | 2.57 | 9.13E-03 |
| LCP2     | 2.57 | 1.79E-02 |
| STAM2    | 2.57 | 3.82E-03 |
| CDS2     | 2.56 | 1.44E-02 |
| UBE2D3P1 | 2.56 | 2.28E-02 |
| SLC35A5  | 2.56 | 1.50E-02 |
| SERPINB9 | 2.55 | 1.64E-02 |
| SLFN5    | 2.55 | 2.52E-03 |
| HERPUD2  | 2.55 | 5.16E-04 |
| RAB1A    | 2.55 | 1.67E-03 |
| GNA13    | 2.54 | 8.45E-03 |
| FCGR2A   | 2.54 | 1.95E-02 |
| SEPHS2   | 2.54 | 1.39E-02 |
| LGALS8   | 2.54 | 8.60E-03 |
| PTK2B    | 2.54 | 3.54E-03 |

|          |      |          |
|----------|------|----------|
| MAPK14   | 2.54 | 1.37E-02 |
| HEXD     | 2.53 | 1.11E-03 |
| TUT7     | 2.53 | 1.43E-02 |
| PFKFB2   | 2.53 | 3.43E-02 |
| FBXL5    | 2.52 | 1.40E-02 |
| NT5C2    | 2.52 | 3.16E-02 |
| CMTM6    | 2.52 | 2.07E-02 |
| AP1M2    | 2.52 | 4.51E-02 |
| ETV6     | 2.51 | 2.58E-02 |
| IMPA1    | 2.51 | 3.26E-03 |
| CTSL     | 2.51 | 5.48E-02 |
| SH3GLB1  | 2.51 | 1.52E-03 |
| SLC49A3  | 2.50 | 4.85E-02 |
| USP15    | 2.50 | 1.52E-02 |
| COP1     | 2.50 | 4.90E-03 |
| C4orf3   | 2.50 | 7.06E-03 |
| TLR1     | 2.49 | 2.46E-02 |
| NT5C3A   | 2.49 | 2.36E-03 |
| SERPINB1 | 2.49 | 9.52E-03 |
| HPSE     | 2.48 | 1.51E-02 |
| RAP2C    | 2.48 | 3.72E-03 |
| ARL11    | 2.48 | 4.16E-03 |
| ATP6V1B2 | 2.48 | 2.43E-02 |
| MXD1     | 2.48 | 1.49E-02 |
| IRF9     | 2.48 | 3.77E-02 |
| MOB3C    | 2.47 | 3.66E-03 |
| LMTK2    | 2.47 | 4.60E-02 |
| RASGEF1B | 2.47 | 1.20E-02 |
| APOL3    | 2.47 | 4.40E-02 |
| C19orf12 | 2.47 | 2.73E-03 |
| MED12L   | 2.47 | 2.86E-02 |
| ACTR3C   | 2.46 | 3.04E-02 |
| OSGIN2   | 2.46 | 2.10E-02 |
| GCNT2    | 2.46 | 1.46E-02 |
| AP1AR    | 2.46 | 2.89E-02 |
| PLAGL1   | 2.46 | 3.61E-02 |
| FCER1G   | 2.46 | 2.85E-02 |
| DESI1    | 2.46 | 6.62E-03 |
| ARRDC3   | 2.45 | 1.54E-02 |
| TRANK1   | 2.45 | 4.97E-02 |
| GALC     | 2.45 | 1.91E-02 |
| CD300A   | 2.45 | 2.17E-02 |
| PRR5L    | 2.45 | 5.27E-02 |
| KDSR     | 2.45 | 1.92E-02 |
| UBQLN2   | 2.45 | 1.76E-02 |

|          |      |          |
|----------|------|----------|
| TVP23B   | 2.44 | 3.59E-02 |
| PLGRKT   | 2.44 | 1.00E-02 |
| MORC3    | 2.44 | 2.02E-03 |
| UBE2W    | 2.44 | 1.68E-02 |
| MYL12A   | 2.44 | 7.18E-04 |
| ITPRIP   | 2.44 | 2.65E-02 |
| SLC25A28 | 2.44 | 1.70E-02 |
| DTNBP1   | 2.44 | 8.36E-03 |
| IFNGR2   | 2.44 | 5.01E-03 |
| PTGS2    | 2.43 | 4.19E-02 |
| DMXL2    | 2.43 | 3.16E-02 |
| GSTK1    | 2.43 | 1.42E-02 |
| C1D      | 2.43 | 1.89E-02 |
| ELF1     | 2.43 | 3.48E-04 |
| HIF1A    | 2.43 | 8.00E-03 |
| CCDC146  | 2.43 | 3.48E-02 |
| TM9SF2   | 2.42 | 1.44E-02 |
| HTATIP2  | 2.42 | 2.91E-03 |
| HEBP1    | 2.42 | 1.42E-02 |
| CIR1     | 2.42 | 2.91E-02 |
| IRF5     | 2.41 | 2.22E-02 |
| ZNF396   | 2.41 | 3.12E-02 |
| DEGS1    | 2.41 | 7.56E-03 |
| BTN2A1   | 2.41 | 7.56E-03 |
| ANKRD13A | 2.41 | 6.96E-03 |
| CUL1     | 2.41 | 1.82E-02 |
| FCAR     | 2.41 | 2.70E-02 |
| GLS      | 2.41 | 2.21E-02 |
| TPMT     | 2.40 | 1.37E-02 |
| GSTO1    | 2.40 | 2.13E-02 |
| CARS2    | 2.40 | 1.79E-02 |
| ZFP36    | 2.40 | 2.48E-02 |
| GCNT1    | 2.40 | 1.20E-02 |
| TLR4     | 2.40 | 1.68E-02 |
| PILRA    | 2.40 | 3.43E-02 |
| TMEM59   | 2.40 | 6.37E-03 |
| NFKBIE   | 2.39 | 1.81E-02 |
| POMP     | 2.39 | 1.42E-02 |
| NECAP1   | 2.39 | 2.60E-03 |
| CXCR2P1  | 2.39 | 5.30E-02 |
| WSB1     | 2.38 | 3.79E-03 |
| CYSTM1   | 2.38 | 2.15E-02 |
| SCRN3    | 2.38 | 3.03E-03 |
| H2AC6    | 2.37 | 3.22E-03 |
| PIGB     | 2.37 | 2.23E-03 |

|          |      |          |
|----------|------|----------|
| ECT2     | 2.37 | 5.15E-02 |
| TOR1AIP1 | 2.37 | 8.59E-03 |
| TRIM14   | 2.37 | 5.47E-03 |
| TLR2     | 2.37 | 2.88E-02 |
| NXT2     | 2.37 | 3.93E-02 |
| TBK1     | 2.37 | 4.44E-02 |
| GSDMD    | 2.36 | 3.54E-02 |
| MED28    | 2.36 | 9.38E-04 |
| TMX1     | 2.36 | 3.85E-02 |
| MEFV     | 2.36 | 3.90E-02 |
| CCR2     | 2.36 | 2.60E-02 |
| RAB5IF   | 2.36 | 4.38E-02 |
| BLOC1S6  | 2.36 | 1.10E-02 |
| SCLT1    | 2.36 | 9.30E-03 |
| EDEM1    | 2.36 | 1.17E-02 |
| PRKCD    | 2.36 | 2.94E-02 |
| ELL2     | 2.36 | 3.55E-03 |
| STARD3NL | 2.35 | 1.15E-02 |
| JUNB     | 2.35 | 1.91E-02 |
| GPR141   | 2.35 | 1.46E-02 |
| LILRA5   | 2.35 | 2.78E-02 |
| HSD17B11 | 2.35 | 1.12E-02 |
| RBM43    | 2.35 | 2.48E-02 |
| ATP1B3   | 2.34 | 1.61E-02 |
| MEF2A    | 2.34 | 3.86E-03 |
| C4orf33  | 2.34 | 1.99E-02 |
| RBM23    | 2.34 | 1.23E-02 |
| TMEM30A  | 2.34 | 3.72E-02 |
| SDE2     | 2.34 | 2.76E-02 |
| BCL10    | 2.34 | 2.15E-03 |
| SPTLC2   | 2.34 | 4.94E-03 |
| BID      | 2.34 | 1.55E-02 |
| STK24    | 2.34 | 1.70E-02 |
| FGFR1OP2 | 2.34 | 3.45E-03 |
| ZFYVE26  | 2.34 | 1.43E-02 |
| MAP3K8   | 2.34 | 2.30E-03 |
| FEM1C    | 2.34 | 3.21E-02 |
| RELB     | 2.34 | 3.15E-02 |
| GPBP1    | 2.33 | 1.86E-02 |
| TMEM33   | 2.33 | 2.26E-03 |
| MAP2K6   | 2.33 | 2.14E-03 |
| GPN3     | 2.33 | 1.12E-02 |
| LAMP2    | 2.32 | 1.49E-02 |
| CTBS     | 2.32 | 1.18E-02 |
| TSC22D1  | 2.32 | 1.63E-02 |



|           |      |          |
|-----------|------|----------|
| CHMP2B    | 2.32 | 5.71E-03 |
| VWA3B     | 2.32 | 5.29E-02 |
| RFX5      | 2.32 | 2.17E-02 |
| SRP54     | 2.32 | 1.14E-03 |
| LIMK1     | 2.32 | 3.59E-02 |
| RAB8A     | 2.31 | 5.03E-03 |
| RAB31     | 2.31 | 2.78E-02 |
| NFE2L2    | 2.31 | 6.95E-03 |
| NDUFB6    | 2.31 | 2.43E-02 |
| IL12RB1   | 2.31 | 1.08E-02 |
| RAB10     | 2.31 | 1.88E-03 |
| SLC7A7    | 2.31 | 2.36E-02 |
| QKI       | 2.31 | 1.92E-03 |
| GMPR2     | 2.31 | 6.67E-03 |
| USP33     | 2.31 | 5.32E-03 |
| TOP1      | 2.31 | 4.68E-02 |
| NOD1      | 2.30 | 2.62E-02 |
| ZNF273    | 2.30 | 4.26E-02 |
| NIPSNAP3A | 2.29 | 3.71E-02 |
| DRAP1     | 2.29 | 4.02E-02 |
| ATXN7     | 2.29 | 3.21E-02 |
| NFKBIA    | 2.29 | 3.08E-02 |
| SKIL      | 2.29 | 1.83E-02 |
| JPX       | 2.29 | 2.19E-02 |
| EPHB1     | 2.29 | 2.96E-02 |
| DENND1A   | 2.29 | 5.24E-02 |
| TFG       | 2.29 | 7.96E-03 |
| SIGLEC5   | 2.29 | 4.54E-02 |
| H2BC5     | 2.29 | 2.62E-02 |
| TMEM165   | 2.28 | 4.32E-03 |
| CREM      | 2.28 | 1.92E-02 |
| PTPRC     | 2.28 | 6.67E-03 |
| TMEM154   | 2.28 | 7.56E-03 |
| SCYL2     | 2.28 | 1.16E-02 |
| CBR1      | 2.28 | 2.08E-02 |
| RIPK1     | 2.28 | 1.13E-02 |
| BMPR2     | 2.28 | 6.36E-03 |
| SFT2D1    | 2.28 | 5.46E-03 |
| FNDC3A    | 2.28 | 1.38E-02 |
| FRMD4B    | 2.27 | 3.15E-02 |
| RPAP3     | 2.27 | 8.59E-03 |
| ABCA1     | 2.27 | 3.21E-02 |
| CNIH4     | 2.27 | 4.00E-02 |
| DENND1B   | 2.27 | 2.37E-03 |
| MTF1      | 2.27 | 1.80E-02 |

|          |      |          |
|----------|------|----------|
| NTNG2    | 2.27 | 5.43E-02 |
| ZC3H12A  | 2.27 | 1.66E-02 |
| LILRB3   | 2.27 | 5.24E-02 |
| MMADHC   | 2.26 | 3.80E-03 |
| CLEC4A   | 2.26 | 7.98E-03 |
| GCA      | 2.26 | 5.06E-02 |
| HAUS4    | 2.26 | 2.41E-02 |
| DGLUCY   | 2.26 | 1.38E-02 |
| DECR1    | 2.26 | 1.06E-02 |
| ELF4     | 2.26 | 3.36E-02 |
| DIP2B    | 2.26 | 5.03E-03 |
| ELK1     | 2.25 | 9.63E-03 |
| AP1S2    | 2.25 | 3.71E-02 |
| NRBF2    | 2.25 | 1.76E-02 |
| C21orf91 | 2.25 | 1.83E-02 |
| PAK1     | 2.25 | 3.48E-02 |
| PRKAR1A  | 2.25 | 3.59E-02 |
| LAT2     | 2.25 | 1.83E-02 |
| C6orf62  | 2.24 | 5.03E-04 |
| HDAC4    | 2.23 | 4.53E-02 |
| LCP1     | 2.23 | 4.00E-02 |
| PARP3    | 2.23 | 3.92E-02 |
| LILRB1   | 2.23 | 3.90E-02 |
| TIMM10   | 2.23 | 1.85E-02 |
| OSTM1    | 2.22 | 1.62E-02 |
| NDC80    | 2.22 | 4.17E-02 |
| KMO      | 2.22 | 3.11E-02 |
| C1orf52  | 2.22 | 2.30E-03 |
| STX17    | 2.22 | 8.57E-03 |
| SLC40A1  | 2.22 | 3.40E-02 |
| FCGR3A   | 2.21 | 3.04E-02 |
| ATP6V1C1 | 2.21 | 8.72E-03 |
| IRF8     | 2.21 | 1.71E-02 |
| CD74     | 2.21 | 3.04E-02 |
| MTMR6    | 2.21 | 1.02E-02 |
| EXT1     | 2.21 | 9.45E-03 |
| PHACTR2  | 2.20 | 8.21E-03 |
| ARL8B    | 2.20 | 1.06E-03 |
| SLC30A7  | 2.20 | 1.53E-02 |
| MILR1    | 2.20 | 1.86E-02 |
| TATDN3   | 2.20 | 3.41E-03 |
| CLIC1    | 2.20 | 1.96E-02 |
| FMR1     | 2.20 | 4.32E-02 |
| CDC42SE2 | 2.20 | 1.70E-02 |
| RHOQ     | 2.19 | 2.85E-02 |

|         |      |          |
|---------|------|----------|
| SERTAD3 | 2.19 | 1.01E-02 |
| BROX    | 2.19 | 5.03E-03 |
| GVINP1  | 2.19 | 3.23E-02 |
| TMED7   | 2.18 | 3.17E-02 |
| TSPAN2  | 2.18 | 2.69E-02 |
| CARD8   | 2.18 | 4.07E-03 |
| CD47    | 2.18 | 3.99E-03 |
| SBF2    | 2.17 | 1.82E-02 |
| PPP1R11 | 2.17 | 2.31E-02 |
| ACSL5   | 2.17 | 1.26E-02 |
| PNPLA8  | 2.17 | 2.66E-02 |
| SRF     | 2.17 | 1.96E-02 |
| SNTB1   | 2.17 | 4.38E-02 |
| AKIRIN2 | 2.17 | 1.20E-02 |
| CPPED1  | 2.17 | 5.29E-02 |
| GLUL    | 2.17 | 5.08E-02 |
| BST1    | 2.17 | 1.98E-02 |
| STAP1   | 2.17 | 3.45E-02 |
| CTSB    | 2.17 | 3.59E-02 |
| USPL1   | 2.17 | 7.13E-03 |
| ZNRF2   | 2.17 | 7.03E-03 |
| SCYL3   | 2.17 | 3.13E-02 |
| METTL4  | 2.17 | 2.38E-02 |
| SLFN12  | 2.17 | 4.67E-02 |
| GDI2    | 2.16 | 1.69E-03 |
| ZDHHC13 | 2.16 | 1.66E-02 |
| RESF1   | 2.16 | 5.03E-03 |
| KIF5B   | 2.16 | 9.89E-03 |
| MAX     | 2.16 | 6.78E-03 |
| NCSTN   | 2.16 | 4.47E-02 |
| CXorf38 | 2.16 | 2.76E-03 |
| GLIPR2  | 2.16 | 5.24E-02 |
| ABHD3   | 2.16 | 2.93E-02 |
| AMN1    | 2.16 | 1.98E-02 |
| ABI1    | 2.16 | 2.86E-02 |
| PRKD2   | 2.16 | 3.51E-02 |
| GIMAP8  | 2.15 | 3.57E-02 |
| THEMIS2 | 2.15 | 4.55E-02 |
| RB1     | 2.15 | 1.44E-02 |
| DHR SX  | 2.15 | 2.12E-02 |
| PSMA3   | 2.14 | 5.46E-03 |
| TBC1D2B | 2.14 | 2.88E-02 |
| MFSD14A | 2.14 | 2.60E-02 |
| CNEP1R1 | 2.14 | 3.29E-02 |
| ZNF230  | 2.13 | 2.63E-02 |

|          |      |          |
|----------|------|----------|
| PIP4P2   | 2.13 | 2.66E-02 |
| GSAP     | 2.13 | 2.12E-02 |
| MS4A6A   | 2.13 | 3.25E-02 |
| KDM6A    | 2.13 | 2.58E-02 |
| TTC32    | 2.13 | 4.31E-02 |
| SDHD     | 2.12 | 1.46E-02 |
| GBA      | 2.11 | 3.96E-02 |
| ADPGK    | 2.11 | 2.42E-03 |
| PPP2R2A  | 2.11 | 1.00E-02 |
| MTMR4    | 2.11 | 1.63E-02 |
| SNX2     | 2.11 | 2.19E-02 |
| CYLD     | 2.10 | 2.10E-02 |
| WASHC4   | 2.10 | 1.54E-02 |
| TMEM167B | 2.10 | 1.71E-02 |
| ENTPD1   | 2.10 | 2.05E-02 |
| TXNIP    | 2.10 | 1.05E-02 |
| ST3GAL5  | 2.10 | 1.47E-02 |
| NPTN     | 2.10 | 2.80E-02 |
| NUP58    | 2.10 | 1.36E-02 |
| CCNL1    | 2.10 | 1.13E-02 |
| TRIQK    | 2.09 | 3.98E-02 |
| ANXA2R   | 2.09 | 3.11E-02 |
| SPCS3    | 2.09 | 1.23E-02 |
| PPCDC    | 2.08 | 3.93E-02 |
| LAPTM4A  | 2.08 | 1.90E-02 |
| DPH3     | 2.08 | 6.95E-03 |
| TXNL4B   | 2.08 | 7.19E-03 |
| RIOK3    | 2.08 | 2.96E-02 |
| SLC37A1  | 2.08 | 3.06E-02 |
| KPNB1    | 2.08 | 3.85E-02 |
| TRIM27   | 2.07 | 3.94E-02 |
| CDC73    | 2.07 | 4.30E-03 |
| PPM1K    | 2.07 | 9.07E-03 |
| LRRC61   | 2.07 | 4.55E-02 |
| ACTR3    | 2.07 | 3.86E-02 |
| PSMA5    | 2.06 | 1.99E-02 |
| KCMF1    | 2.06 | 1.13E-03 |
| RMC1     | 2.06 | 1.80E-02 |
| BTG2     | 2.06 | 2.25E-02 |
| VTA1     | 2.06 | 3.21E-02 |
| GTPBP2   | 2.06 | 2.22E-02 |
| SZRD1    | 2.05 | 8.45E-03 |
| BNIP3L   | 2.05 | 5.11E-02 |
| SPART    | 2.05 | 2.65E-02 |
| SETD2    | 2.05 | 1.51E-02 |

|         |       |          |
|---------|-------|----------|
| SAMD8   | 2.04  | 2.86E-02 |
| UBR1    | 2.04  | 6.84E-03 |
| ZNF619  | 2.04  | 2.11E-02 |
| GALNS   | 2.04  | 1.95E-02 |
| SFT2D2  | 2.04  | 1.93E-02 |
| PSEN1   | 2.04  | 2.19E-02 |
| PRPF40A | 2.04  | 5.16E-04 |
| SHOC2   | 2.04  | 2.39E-02 |
| TRMT1L  | 2.04  | 1.65E-02 |
| CSTF3   | 2.03  | 1.31E-02 |
| ZNF350  | 2.03  | 1.93E-02 |
| NFYA    | 2.03  | 1.80E-02 |
| CCNDBP1 | 2.03  | 9.47E-03 |
| STX12   | 2.03  | 1.37E-02 |
| BBX     | 2.03  | 1.38E-02 |
| JKAMP   | 2.02  | 4.74E-02 |
| MANBAL  | 2.02  | 9.80E-03 |
| TMUB2   | 2.02  | 7.99E-03 |
| RAB14   | 2.02  | 5.03E-03 |
| ANXA5   | 2.02  | 3.66E-02 |
| HBP1    | 2.02  | 4.82E-02 |
| SNX13   | 2.02  | 2.66E-02 |
| MARCHF5 | 2.02  | 2.65E-02 |
| NFKBIZ  | 2.02  | 3.23E-02 |
| DCAF11  | 2.02  | 1.85E-02 |
| TOPORS  | 2.01  | 5.03E-02 |
| SLU7    | 2.01  | 1.16E-02 |
| ATP6V1D | 2.01  | 1.59E-03 |
| CFLAR   | 2.01  | 4.27E-02 |
| GNAI3   | 2.00  | 7.56E-03 |
| CALM2   | 2.00  | 1.55E-02 |
| YME1L1  | 2.00  | 1.20E-03 |
| YIPF6   | 2.00  | 5.46E-03 |
| PI4K2A  | -2.00 | 9.13E-03 |
| SARM1   | -2.00 | 3.88E-02 |
| TEDC1   | -2.00 | 4.31E-02 |
| PDCD7   | -2.00 | 3.20E-02 |
| SNRNP70 | -2.00 | 1.01E-03 |
| TRIM47  | -2.00 | 4.57E-02 |
| TAB1    | -2.00 | 1.19E-02 |
| MRI1    | -2.00 | 1.78E-02 |
| PRPS1   | -2.00 | 1.02E-02 |
| HCST    | -2.00 | 3.87E-02 |
| DUS2    | -2.01 | 5.46E-03 |
| IL32    | -2.01 | 2.39E-02 |

|          |       |          |
|----------|-------|----------|
| ZNF34    | -2.01 | 5.33E-02 |
| CUTA     | -2.01 | 2.48E-02 |
| RAB33A   | -2.01 | 4.78E-02 |
| YLPM1    | -2.01 | 2.48E-02 |
| CPSF4    | -2.01 | 2.95E-03 |
| PABPN1   | -2.01 | 3.83E-02 |
| GIMAP1   | -2.02 | 9.44E-03 |
| CD3G     | -2.02 | 2.06E-02 |
| C16orf86 | -2.02 | 2.27E-02 |
| FOXO1    | -2.02 | 1.76E-02 |
| ATM      | -2.03 | 5.29E-02 |
| TRIM65   | -2.03 | 1.82E-02 |
| LCK      | -2.03 | 1.38E-02 |
| SCRN2    | -2.03 | 2.65E-02 |
| ZNF219   | -2.03 | 4.93E-02 |
| ZBTB24   | -2.03 | 8.20E-03 |
| ZFYVE19  | -2.03 | 2.41E-03 |
| MPRIP    | -2.03 | 1.68E-02 |
| SIGLEC10 | -2.04 | 3.91E-02 |
| NLRC3    | -2.04 | 3.18E-02 |
| MFHAS1   | -2.04 | 3.52E-02 |
| CLEC2D   | -2.04 | 4.78E-02 |
| EVI5L    | -2.04 | 1.75E-02 |
| SEPTIN11 | -2.04 | 8.58E-03 |
| GIPC1    | -2.04 | 2.00E-02 |
| RHOBTB2  | -2.05 | 6.74E-03 |
| BIN1     | -2.05 | 4.27E-03 |
| PCED1A   | -2.05 | 2.41E-03 |
| QTRT1    | -2.05 | 4.52E-03 |
| CD81     | -2.05 | 1.52E-02 |
| PFAS     | -2.05 | 2.10E-02 |
| HSD17B8  | -2.05 | 2.71E-02 |
| CPSF1    | -2.05 | 5.15E-03 |
| UBASH3A  | -2.05 | 7.51E-03 |
| PDCD11   | -2.05 | 3.44E-02 |
| POP1     | -2.05 | 4.31E-02 |
| ENDOV    | -2.05 | 1.46E-02 |
| MORC2    | -2.05 | 1.85E-02 |
| PGAP2    | -2.06 | 4.26E-03 |
| DNMT1    | -2.06 | 2.30E-03 |
| DBN1     | -2.06 | 4.29E-02 |
| CD99     | -2.06 | 6.55E-03 |
| NME3     | -2.06 | 1.80E-02 |
| TRBC2    | -2.06 | 1.20E-02 |
| SMG6     | -2.06 | 3.11E-02 |

|         |       |          |
|---------|-------|----------|
| CAMKK1  | -2.06 | 3.18E-02 |
| DTD1    | -2.06 | 1.35E-03 |
| RBM15   | -2.06 | 7.34E-03 |
| DHRS4L2 | -2.06 | 3.47E-02 |
| STMN3   | -2.07 | 1.80E-02 |
| MDN1    | -2.07 | 3.92E-02 |
| PIGP    | -2.07 | 3.46E-02 |
| HMOX2   | -2.07 | 6.73E-03 |
| WDR54   | -2.07 | 1.96E-02 |
| D2HGDH  | -2.07 | 3.48E-02 |
| PGAP3   | -2.07 | 1.62E-02 |
| MIEF2   | -2.07 | 2.07E-02 |
| ANKZF1  | -2.07 | 4.77E-03 |
| WDR59   | -2.07 | 7.17E-03 |
| KAT14   | -2.07 | 2.16E-02 |
| PARP16  | -2.08 | 2.65E-02 |
| LIG1    | -2.08 | 1.38E-02 |
| CNTROB  | -2.08 | 3.45E-02 |
| RCAN1   | -2.08 | 4.32E-02 |
| NBPF11  | -2.08 | 3.57E-02 |
| SFI1    | -2.08 | 1.49E-03 |
| CMTM8   | -2.08 | 5.45E-02 |
| POMT1   | -2.08 | 2.56E-02 |
| HRAS    | -2.08 | 3.15E-02 |
| FANCE   | -2.09 | 2.46E-02 |
| HNRNPU  | -2.09 | 5.29E-02 |
| KHK     | -2.09 | 5.09E-02 |
| KRBA2   | -2.09 | 5.43E-02 |
| ALDOC   | -2.09 | 3.59E-02 |
| BAG3    | -2.09 | 2.81E-02 |
| TOP1MT  | -2.09 | 3.17E-02 |
| DAG1    | -2.09 | 5.27E-02 |
| MTR     | -2.09 | 1.40E-02 |
| PLCB2   | -2.09 | 7.41E-03 |
| BCL2    | -2.09 | 2.17E-02 |
| CAPS    | -2.10 | 1.71E-02 |
| FCSK    | -2.10 | 5.09E-03 |
| APBA2   | -2.10 | 3.34E-02 |
| ECHDC2  | -2.10 | 2.38E-02 |
| ZNF227  | -2.10 | 3.43E-02 |
| NDUFA13 | -2.10 | 3.97E-02 |
| GPR89A  | -2.11 | 3.88E-02 |
| DYRK2   | -2.11 | 1.61E-02 |
| SAC3D1  | -2.11 | 1.62E-02 |
| DDX46   | -2.11 | 2.72E-02 |

|         |       |          |
|---------|-------|----------|
| LTBP4   | -2.11 | 1.26E-02 |
| AKR1B1  | -2.11 | 5.82E-03 |
| ACBD4   | -2.11 | 9.72E-03 |
| TRMT44  | -2.11 | 4.27E-03 |
| PHF19   | -2.12 | 7.56E-03 |
| VIPR1   | -2.12 | 1.57E-02 |
| MAPK13  | -2.12 | 9.79E-03 |
| POLE    | -2.12 | 3.83E-02 |
| ZNF48   | -2.12 | 4.21E-02 |
| MFSD3   | -2.13 | 2.55E-02 |
| CENPV   | -2.13 | 2.85E-02 |
| AFG3L1P | -2.13 | 2.35E-02 |
| LTBP3   | -2.13 | 2.54E-02 |
| ENDOG   | -2.13 | 3.15E-02 |
| CD96    | -2.13 | 1.32E-02 |
| ANKRD55 | -2.13 | 2.86E-02 |
| KLHDC4  | -2.13 | 1.59E-02 |
| ZFPM1   | -2.13 | 3.69E-02 |
| PIGL    | -2.14 | 4.37E-02 |
| HDGFL2  | -2.14 | 5.58E-03 |
| HPGD    | -2.14 | 5.08E-02 |
| ZNF696  | -2.14 | 6.61E-03 |
| PARD6A  | -2.14 | 2.17E-02 |
| CD1C    | -2.14 | 2.17E-02 |
| ZNF783  | -2.14 | 1.51E-02 |
| ATP1A1  | -2.14 | 3.54E-03 |
| ADK     | -2.14 | 8.33E-03 |
| TRGV2   | -2.14 | 4.84E-02 |
| TRBC1   | -2.14 | 8.17E-03 |
| GOLGA8A | -2.14 | 4.98E-02 |
| SNHG11  | -2.15 | 5.76E-03 |
| ZNF784  | -2.15 | 4.36E-02 |
| DDX27   | -2.15 | 1.21E-03 |
| CBX5    | -2.15 | 1.20E-02 |
| ZNF589  | -2.15 | 1.47E-02 |
| RBM28   | -2.15 | 1.30E-02 |
| GPATCH4 | -2.15 | 1.71E-02 |
| SLC35D1 | -2.15 | 2.62E-02 |
| R3HDM1  | -2.15 | 3.65E-03 |
| TRERF1  | -2.16 | 6.37E-03 |
| ZNF512B | -2.16 | 2.11E-02 |
| USP28   | -2.16 | 1.51E-02 |
| ZNF444  | -2.16 | 7.03E-03 |
| PYCR3   | -2.16 | 1.43E-02 |
| FLNA    | -2.16 | 1.55E-02 |



|          |       |          |
|----------|-------|----------|
| RBFA     | -2.16 | 1.04E-02 |
| ZFP14    | -2.16 | 4.13E-02 |
| PARP1    | -2.16 | 6.70E-03 |
| MIB2     | -2.16 | 2.42E-03 |
| ATRNL    | -2.17 | 4.12E-02 |
| FLYWCH1  | -2.17 | 4.89E-03 |
| GZF1     | -2.17 | 3.20E-02 |
| KLF12    | -2.17 | 1.13E-02 |
| IL21R    | -2.17 | 5.57E-03 |
| SAMD3    | -2.17 | 4.83E-02 |
| WDR91    | -2.17 | 3.80E-03 |
| TMEM107  | -2.17 | 5.46E-03 |
| RPAP1    | -2.18 | 9.07E-03 |
| KANTR    | -2.18 | 3.14E-02 |
| AMPD3    | -2.18 | 1.27E-02 |
| DIP2A    | -2.18 | 1.51E-02 |
| ATG9B    | -2.18 | 3.76E-02 |
| ABHD15   | -2.18 | 9.08E-03 |
| HLCS     | -2.18 | 3.48E-02 |
| EME2     | -2.19 | 9.34E-03 |
| ZNF2     | -2.19 | 2.60E-02 |
| KLC2     | -2.19 | 1.80E-02 |
| TAF4     | -2.19 | 5.21E-02 |
| AASDH    | -2.19 | 6.58E-03 |
| DOHH     | -2.19 | 2.52E-02 |
| LBH      | -2.19 | 3.70E-03 |
| RTN4R    | -2.20 | 4.94E-02 |
| CCDC61   | -2.20 | 5.46E-03 |
| FAHD2A   | -2.20 | 4.07E-03 |
| HTT      | -2.20 | 1.13E-02 |
| ZBTB38   | -2.20 | 2.56E-03 |
| TRAPPC6A | -2.20 | 8.33E-03 |
| TRIM52   | -2.20 | 6.95E-03 |
| DHODH    | -2.20 | 6.53E-03 |
| ZAP70    | -2.20 | 7.36E-03 |
| PLCD1    | -2.20 | 2.03E-02 |
| LGALS12  | -2.20 | 3.80E-02 |
| CLUH     | -2.20 | 1.27E-02 |
| THBD     | -2.20 | 4.83E-02 |
| NIBAN3   | -2.20 | 2.96E-02 |
| SFXN5    | -2.20 | 6.50E-03 |
| NOXA1    | -2.21 | 3.34E-02 |
| CHD6     | -2.21 | 1.99E-02 |
| NUMA1    | -2.21 | 5.98E-03 |
| CBLB     | -2.21 | 1.10E-02 |

|          |       |          |
|----------|-------|----------|
| PEX5     | -2.21 | 2.07E-02 |
| C12orf57 | -2.21 | 4.24E-02 |
| CCDC28B  | -2.21 | 2.33E-02 |
| TCFL5    | -2.22 | 3.01E-02 |
| FBXW9    | -2.22 | 3.11E-02 |
| TBC1D19  | -2.22 | 5.28E-02 |
| NOL9     | -2.22 | 1.35E-02 |
| SIGIRR   | -2.22 | 3.41E-03 |
| KAT6B    | -2.22 | 1.95E-02 |
| DOP1B    | -2.22 | 1.11E-02 |
| PILRB    | -2.22 | 1.95E-02 |
| NUDC     | -2.22 | 7.16E-03 |
| SPN      | -2.22 | 5.40E-03 |
| PLEKHF1  | -2.23 | 2.69E-02 |
| SLC2A4RG | -2.23 | 2.74E-02 |
| SNRNP25  | -2.23 | 1.22E-02 |
| LRRC45   | -2.23 | 1.09E-02 |
| CD6      | -2.23 | 4.27E-03 |
| IL7R     | -2.24 | 2.48E-02 |
| ANO9     | -2.24 | 1.19E-02 |
| PRH1     | -2.24 | 4.96E-02 |
| RAD18    | -2.24 | 2.29E-02 |
| HS6ST1   | -2.24 | 4.90E-03 |
| USF2     | -2.24 | 5.17E-02 |
| FBLN7    | -2.24 | 1.76E-02 |
| PBX4     | -2.24 | 2.13E-02 |
| SLC2A8   | -2.25 | 1.59E-02 |
| ABCA3    | -2.25 | 3.57E-02 |
| TCHP     | -2.25 | 1.56E-02 |
| CREB3L4  | -2.25 | 3.59E-02 |
| SEPTIN9  | -2.25 | 2.73E-03 |
| PIK3IP1  | -2.25 | 2.20E-02 |
| SLC25A29 | -2.25 | 2.96E-02 |
| CCDC57   | -2.25 | 5.87E-03 |
| PELI3    | -2.26 | 8.88E-03 |
| BACH2    | -2.26 | 6.04E-03 |
| ZBTB39   | -2.26 | 1.68E-02 |
| ESYT1    | -2.26 | 7.11E-03 |
| SLC25A4  | -2.26 | 1.87E-02 |
| SELENOM  | -2.26 | 2.63E-02 |
| USP45    | -2.26 | 4.04E-02 |
| CTSK     | -2.26 | 4.58E-02 |
| FCMR     | -2.26 | 6.88E-03 |
| PDE6G    | -2.26 | 2.45E-02 |
| EIF2B4   | -2.26 | 9.49E-04 |

|          |       |          |
|----------|-------|----------|
| CEP290   | -2.26 | 5.46E-02 |
| PDE4DIP  | -2.26 | 1.19E-02 |
| MAZ      | -2.27 | 1.64E-02 |
| ZNF827   | -2.27 | 4.10E-02 |
| SUPT3H   | -2.27 | 3.89E-02 |
| LARGE2   | -2.27 | 2.88E-02 |
| SH3BP1   | -2.27 | 4.24E-02 |
| RPTOR    | -2.27 | 2.78E-03 |
| SH2D2A   | -2.27 | 1.14E-02 |
| ID2      | -2.28 | 7.46E-03 |
| COQ8A    | -2.28 | 7.27E-03 |
| ZDHHC8   | -2.28 | 2.95E-03 |
| ZNF677   | -2.28 | 4.01E-02 |
| DSTYK    | -2.28 | 5.01E-04 |
| RASA4CP  | -2.28 | 2.82E-02 |
| CD247    | -2.28 | 7.41E-03 |
| HNRNPH1  | -2.28 | 3.58E-03 |
| XYLT1    | -2.29 | 1.75E-02 |
| SWAP70   | -2.29 | 3.14E-03 |
| CAMKMT   | -2.29 | 2.26E-03 |
| ANKRD36C | -2.29 | 1.43E-02 |
| BCL9     | -2.29 | 4.25E-02 |
| TBC1D9   | -2.29 | 1.70E-02 |
| NBPF15   | -2.29 | 4.17E-02 |
| SLC4A7   | -2.29 | 2.12E-02 |
| ERCC2    | -2.29 | 2.01E-02 |
| CABIN1   | -2.30 | 4.30E-03 |
| TSNARE1  | -2.30 | 6.42E-03 |
| MAPK8IP3 | -2.30 | 8.94E-04 |
| TNIK     | -2.30 | 6.61E-03 |
| NT5E     | -2.30 | 4.75E-02 |
| PRKCSH   | -2.31 | 2.66E-02 |
| TCF7     | -2.32 | 5.49E-03 |
| ZNF362   | -2.32 | 1.30E-03 |
| VEGFB    | -2.32 | 1.17E-02 |
| RAB44    | -2.32 | 4.96E-02 |
| GCN1     | -2.32 | 5.44E-04 |
| TSPYL4   | -2.32 | 3.02E-02 |
| MIS18A   | -2.32 | 1.35E-02 |
| TLE2     | -2.32 | 1.74E-02 |
| FDXR     | -2.32 | 2.40E-02 |
| SKAP1    | -2.33 | 8.33E-04 |
| C9orf139 | -2.33 | 1.34E-02 |
| IL11RA   | -2.33 | 1.05E-02 |
| SNRNP200 | -2.33 | 1.09E-04 |

|         |       |          |
|---------|-------|----------|
| REX1BD  | -2.33 | 4.77E-03 |
| NMRAL1  | -2.33 | 1.34E-03 |
| SMARCA4 | -2.33 | 1.20E-03 |
| CFAP410 | -2.33 | 5.73E-03 |
| HGH1    | -2.33 | 3.79E-03 |
| BRF1    | -2.33 | 2.51E-03 |
| CDIP1   | -2.34 | 3.06E-03 |
| CTF1    | -2.34 | 5.37E-02 |
| IFT74   | -2.34 | 4.29E-02 |
| MISP3   | -2.34 | 2.90E-02 |
| BRI3BP  | -2.35 | 3.51E-03 |
| ZNF767P | -2.35 | 1.54E-03 |
| PLCH2   | -2.35 | 4.94E-02 |
| ZBTB40  | -2.35 | 2.51E-03 |
| S1PR4   | -2.35 | 5.03E-03 |
| CARD11  | -2.35 | 2.01E-03 |
| ALKBH6  | -2.35 | 3.11E-02 |
| AUTS2   | -2.35 | 3.67E-02 |
| SPON2   | -2.35 | 5.25E-02 |
| TRGV4   | -2.36 | 4.74E-02 |
| ZNF428  | -2.36 | 4.80E-02 |
| SCAND2P | -2.36 | 3.86E-02 |
| EHMT2   | -2.36 | 1.80E-02 |
| ZNF74   | -2.36 | 1.17E-02 |
| ABHD14B | -2.36 | 5.19E-04 |
| GTPBP3  | -2.37 | 8.71E-03 |
| PPP2R5D | -2.37 | 1.02E-02 |
| RORA    | -2.37 | 9.72E-03 |
| ZNF440  | -2.38 | 2.58E-02 |
| HNRNPD  | -2.38 | 3.78E-03 |
| SPTBN1  | -2.38 | 8.59E-03 |
| KLHL22  | -2.38 | 1.55E-03 |
| PPT2    | -2.38 | 1.11E-02 |
| CEP78   | -2.38 | 1.76E-02 |
| PLCB3   | -2.38 | 2.05E-02 |
| NEURL1  | -2.39 | 2.92E-02 |
| KCNE1   | -2.39 | 4.37E-02 |
| LSM14B  | -2.39 | 2.74E-02 |
| MAP3K12 | -2.39 | 1.42E-02 |
| TBX21   | -2.39 | 3.72E-02 |
| PLXDC1  | -2.39 | 3.27E-02 |
| IRS2    | -2.39 | 3.91E-02 |
| TTC3    | -2.39 | 3.75E-03 |
| SLC41A1 | -2.39 | 8.27E-03 |
| KLC4    | -2.39 | 3.72E-03 |

|         |       |          |
|---------|-------|----------|
| PGPEP1  | -2.39 | 2.62E-02 |
| ERN1    | -2.40 | 2.47E-03 |
| RUBCNL  | -2.40 | 3.16E-02 |
| FNDC10  | -2.40 | 1.45E-02 |
| DHRS13  | -2.40 | 2.77E-02 |
| NUDT13  | -2.40 | 5.10E-02 |
| CEP192  | -2.40 | 1.12E-02 |
| TLE1    | -2.40 | 1.11E-02 |
| ZNHIT6  | -2.40 | 1.85E-02 |
| EIF2AK3 | -2.41 | 2.62E-02 |
| CEP128  | -2.41 | 3.11E-02 |
| MYO9A   | -2.41 | 1.41E-02 |
| CCDC134 | -2.41 | 2.83E-02 |
| PI4KAP2 | -2.41 | 2.81E-02 |
| CNR2    | -2.41 | 7.82E-03 |
| C1orf35 | -2.41 | 6.70E-03 |
| STK39   | -2.42 | 2.11E-03 |
| UBN2    | -2.42 | 1.49E-02 |
| RTL6    | -2.42 | 3.51E-03 |
| LFNG    | -2.42 | 6.64E-03 |
| PTGDR   | -2.42 | 3.43E-02 |
| AFAP1L2 | -2.42 | 4.37E-02 |
| ETS1    | -2.43 | 1.63E-02 |
| BCL7C   | -2.43 | 5.46E-03 |
| ZNF664  | -2.43 | 4.84E-02 |
| CD27    | -2.43 | 5.03E-03 |
| FMO4    | -2.43 | 4.64E-02 |
| SMAD7   | -2.43 | 4.26E-03 |
| DCLRE1B | -2.44 | 1.11E-02 |
| HOMER3  | -2.44 | 1.31E-02 |
| SPIN4   | -2.44 | 3.09E-02 |
| DDX42   | -2.44 | 1.02E-02 |
| KLHL3   | -2.44 | 3.11E-02 |
| PLEC    | -2.45 | 6.73E-03 |
| FUT8    | -2.45 | 1.51E-02 |
| NKG7    | -2.45 | 2.85E-02 |
| ARHGEF9 | -2.45 | 5.20E-03 |
| PHACTR1 | -2.45 | 6.70E-03 |
| DPEP2   | -2.45 | 4.54E-03 |
| ACAP3   | -2.45 | 1.78E-03 |
| PPP1R3E | -2.45 | 1.05E-02 |
| ZBED3   | -2.45 | 1.64E-02 |
| VPS13A  | -2.46 | 1.51E-02 |
| GPM6B   | -2.46 | 4.27E-02 |
| CD93    | -2.46 | 1.50E-02 |

|            |       |          |
|------------|-------|----------|
| PLL        | -2.46 | 3.62E-02 |
| APBB1      | -2.46 | 1.69E-02 |
| AK5        | -2.46 | 1.35E-02 |
| WRN        | -2.46 | 2.82E-02 |
| CX3CR1     | -2.46 | 1.66E-02 |
| SLC27A1    | -2.47 | 1.04E-02 |
| SYTL2      | -2.47 | 1.90E-02 |
| ZNF517     | -2.47 | 3.11E-02 |
| PABPC4     | -2.47 | 6.73E-03 |
| AKAP1      | -2.47 | 2.86E-03 |
| ADCY9      | -2.47 | 1.90E-02 |
| UPF3A      | -2.47 | 8.52E-03 |
| ZNF282     | -2.48 | 1.36E-02 |
| WDR6       | -2.48 | 1.27E-02 |
| SERTAD2    | -2.48 | 4.28E-03 |
| FANCI      | -2.48 | 5.36E-02 |
| DDX54      | -2.48 | 1.25E-03 |
| MTA1       | -2.48 | 2.24E-03 |
| DTX4       | -2.49 | 9.86E-03 |
| ARL4C      | -2.49 | 8.31E-03 |
| TCF19      | -2.49 | 1.93E-02 |
| HRH2       | -2.49 | 8.21E-03 |
| GOLGA2P5   | -2.49 | 3.59E-02 |
| PLCXD1     | -2.49 | 1.42E-02 |
| MACROD1    | -2.49 | 4.06E-02 |
| CRIP2      | -2.49 | 2.56E-02 |
| GOLGA7B    | -2.49 | 2.50E-02 |
| XRCC3      | -2.49 | 2.15E-03 |
| AFF3       | -2.49 | 6.70E-03 |
| NLRX1      | -2.49 | 1.70E-02 |
| PRRT3      | -2.49 | 9.96E-03 |
| TBC1D10A   | -2.50 | 4.40E-05 |
| TNFRSF8    | -2.50 | 3.11E-03 |
| PTGDR2     | -2.50 | 4.37E-02 |
| CHPF       | -2.50 | 2.14E-02 |
| TMEM204    | -2.50 | 1.23E-02 |
| SPATC1L    | -2.51 | 1.36E-02 |
| PIK3R1     | -2.51 | 9.91E-04 |
| LRRC23     | -2.51 | 3.16E-02 |
| NCALD      | -2.51 | 1.81E-02 |
| MVK        | -2.52 | 7.07E-03 |
| ST6GALNAC6 | -2.52 | 4.53E-02 |
| BICDL1     | -2.52 | 7.05E-03 |
| SPECC1L    | -2.53 | 1.54E-02 |
| AH1        | -2.53 | 4.42E-02 |

|          |       |          |
|----------|-------|----------|
| TSPOAP1  | -2.53 | 4.05E-02 |
| CENPB    | -2.53 | 3.21E-02 |
| LPCAT4   | -2.53 | 8.16E-04 |
| PARP15   | -2.53 | 1.02E-03 |
| ISYNA1   | -2.53 | 5.24E-03 |
| SPINT1   | -2.53 | 1.37E-02 |
| RABL6    | -2.53 | 8.68E-03 |
| MDS2     | -2.54 | 1.27E-02 |
| TMEM25   | -2.54 | 1.36E-02 |
| MFGE8    | -2.54 | 2.43E-02 |
| CTSW     | -2.54 | 2.25E-02 |
| MYBBP1A  | -2.54 | 5.60E-03 |
| PA2G4P4  | -2.54 | 3.62E-02 |
| ANTXRPL1 | -2.54 | 1.96E-02 |
| SPNS2    | -2.55 | 3.92E-02 |
| CUL7     | -2.55 | 1.85E-02 |
| TTC16    | -2.55 | 2.06E-02 |
| B4GAT1   | -2.55 | 9.97E-03 |
| MBD3     | -2.55 | 8.86E-03 |
| GOLIM4   | -2.55 | 3.64E-02 |
| PUS1     | -2.55 | 2.41E-03 |
| CD160    | -2.56 | 4.54E-02 |
| CHD3     | -2.56 | 8.45E-03 |
| NELL2    | -2.56 | 2.50E-02 |
| TRDJ1    | -2.56 | 5.24E-02 |
| PITPNC1  | -2.56 | 9.33E-04 |
| CROCCP2  | -2.56 | 9.22E-03 |
| MHENCR   | -2.56 | 2.81E-03 |
| PLCG1    | -2.56 | 9.13E-03 |
| STXBP5   | -2.56 | 5.65E-03 |
| NT5C3AP2 | -2.56 | 4.55E-02 |
| SETD1A   | -2.56 | 2.70E-02 |
| MAP3K9   | -2.57 | 4.74E-02 |
| UBQLN4   | -2.57 | 8.33E-04 |
| ZNF563   | -2.57 | 3.54E-02 |
| NMT2     | -2.58 | 4.79E-03 |
| DUSP16   | -2.58 | 3.41E-03 |
| C9orf40  | -2.58 | 1.61E-03 |
| AGO1     | -2.58 | 8.62E-04 |
| CXCR3    | -2.59 | 1.09E-02 |
| MTSS1    | -2.59 | 6.14E-04 |
| SIK2     | -2.59 | 2.87E-02 |
| EPHA1    | -2.59 | 8.86E-03 |
| CLCF1    | -2.59 | 2.30E-02 |
| MYO15B   | -2.59 | 1.98E-03 |

|          |       |          |
|----------|-------|----------|
| KLRD1    | -2.60 | 2.49E-02 |
| MARCHF9  | -2.60 | 6.35E-03 |
| FAHD2CP  | -2.60 | 3.46E-02 |
| KIF19    | -2.60 | 4.92E-02 |
| ZNF891   | -2.60 | 3.42E-02 |
| FSD1     | -2.60 | 4.55E-02 |
| DNMBP    | -2.60 | 2.56E-02 |
| CHRNA3   | -2.61 | 7.05E-03 |
| RTL10    | -2.61 | 2.15E-04 |
| DGKD     | -2.61 | 8.53E-05 |
| TEF      | -2.61 | 6.77E-03 |
| DHX35    | -2.61 | 2.04E-02 |
| CD320    | -2.62 | 3.14E-03 |
| NFATC2   | -2.62 | 2.56E-03 |
| PPARA    | -2.62 | 3.54E-03 |
| ZNF628   | -2.62 | 5.29E-02 |
| TMEM177  | -2.62 | 1.67E-03 |
| CD7      | -2.62 | 4.29E-03 |
| SYNGR1   | -2.63 | 5.42E-03 |
| SH2B1    | -2.63 | 3.94E-03 |
| NSD2     | -2.63 | 4.50E-03 |
| HID1     | -2.63 | 4.22E-02 |
| RASL11A  | -2.63 | 5.34E-02 |
| ARL10    | -2.63 | 1.85E-02 |
| TMEM238  | -2.64 | 2.30E-02 |
| SYNE1    | -2.64 | 2.06E-03 |
| ACTL10   | -2.64 | 9.26E-03 |
| EML3     | -2.64 | 1.75E-04 |
| MEGF6    | -2.64 | 4.95E-03 |
| FBRSL1   | -2.64 | 6.37E-03 |
| DEF6     | -2.65 | 6.44E-04 |
| KISS1R   | -2.65 | 5.15E-02 |
| HAVCR1   | -2.65 | 4.13E-02 |
| POLR1E   | -2.65 | 2.52E-03 |
| ZBED2    | -2.66 | 3.03E-02 |
| ZSWIM5   | -2.66 | 2.86E-02 |
| LYPD3    | -2.66 | 3.42E-02 |
| NR2F6    | -2.66 | 9.31E-03 |
| PPP1R13B | -2.67 | 8.00E-03 |
| CICP14   | -2.67 | 3.64E-02 |
| SEMA6A   | -2.67 | 2.85E-02 |
| CLIP2    | -2.67 | 6.32E-03 |
| NECTIN1  | -2.68 | 3.13E-02 |
| TGFBR3   | -2.68 | 9.97E-03 |
| QSOX2    | -2.68 | 4.50E-03 |



|          |       |          |
|----------|-------|----------|
| TSTD3    | -2.68 | 3.42E-02 |
| NCOR2    | -2.68 | 1.99E-03 |
| RAB19    | -2.68 | 3.94E-02 |
| HIP1R    | -2.68 | 2.91E-03 |
| TMEM120B | -2.69 | 3.51E-03 |
| ATP2B4   | -2.69 | 7.66E-04 |
| CRTC1    | -2.69 | 2.77E-03 |
| NOP53    | -2.69 | 2.51E-03 |
| CCDC102A | -2.69 | 4.79E-03 |
| CACNA2D2 | -2.69 | 2.43E-02 |
| AGPAT4   | -2.69 | 2.73E-03 |
| TJP3     | -2.69 | 1.31E-02 |
| VMO1     | -2.69 | 5.50E-02 |
| ZC3H12B  | -2.69 | 3.35E-02 |
| IKZF2    | -2.69 | 1.43E-02 |
| ENO3     | -2.69 | 2.50E-02 |
| TSPYL2   | -2.70 | 1.11E-03 |
| ZNF683   | -2.70 | 4.29E-02 |
| CHCHD6   | -2.70 | 2.29E-03 |
| LRRC56   | -2.70 | 3.44E-02 |
| TMIGD2   | -2.71 | 5.13E-03 |
| GPR55    | -2.71 | 4.38E-02 |
| CACNB3   | -2.71 | 4.88E-02 |
| DOK7     | -2.71 | 3.08E-02 |
| PRSS23   | -2.71 | 3.57E-02 |
| MORC4    | -2.72 | 1.58E-02 |
| TLCD3A   | -2.72 | 5.20E-02 |
| BCKDHB   | -2.72 | 7.06E-03 |
| LUNAR1   | -2.72 | 5.12E-02 |
| DLGAP3   | -2.72 | 5.24E-02 |
| ALKBH2   | -2.72 | 2.01E-03 |
| TPM2     | -2.72 | 3.98E-02 |
| ASRGL1   | -2.72 | 7.83E-04 |
| POLR1G   | -2.73 | 4.23E-02 |
| TSEN54   | -2.73 | 1.01E-03 |
| TNFRSF18 | -2.73 | 1.24E-02 |
| BDH1     | -2.73 | 1.94E-03 |
| KLRG1    | -2.73 | 4.73E-03 |
| NCR1     | -2.73 | 2.60E-02 |
| DBNDD1   | -2.74 | 1.69E-02 |
| NRBP2    | -2.74 | 1.48E-02 |
| NSG1     | -2.74 | 1.85E-02 |
| TRGV10   | -2.74 | 2.02E-02 |
| LRRC75A  | -2.74 | 1.39E-02 |
| EPN2     | -2.74 | 7.27E-03 |

|          |       |          |
|----------|-------|----------|
| IL24     | -2.75 | 2.94E-02 |
| ANKRD34A | -2.75 | 4.38E-02 |
| FBXO2    | -2.75 | 8.29E-03 |
| YPEL1    | -2.75 | 7.23E-03 |
| VSIG1    | -2.75 | 9.13E-03 |
| CDC25B   | -2.75 | 4.33E-04 |
| PLCL1    | -2.75 | 5.04E-03 |
| NCR3     | -2.75 | 2.91E-03 |
| ADAM19   | -2.75 | 2.79E-03 |
| ITGB4    | -2.76 | 5.49E-02 |
| CDHR2    | -2.76 | 2.59E-02 |
| UBE2Q2P1 | -2.76 | 4.37E-02 |
| LDOC1    | -2.76 | 5.60E-03 |
| RAD54L2  | -2.76 | 5.43E-04 |
| RFLNB    | -2.76 | 1.79E-02 |
| AMDHD2   | -2.76 | 8.33E-04 |
| BHLHE40  | -2.76 | 5.03E-03 |
| KCTD7    | -2.76 | 8.33E-04 |
| CARNS1   | -2.77 | 1.30E-02 |
| ZNF286A  | -2.77 | 2.57E-02 |
| C1orf216 | -2.77 | 1.00E-02 |
| RRBP1    | -2.78 | 6.14E-03 |
| EPHX1    | -2.78 | 6.62E-03 |
| DLK2     | -2.78 | 4.73E-02 |
| ZFP69    | -2.78 | 1.36E-02 |
| AXIN1    | -2.78 | 2.11E-04 |
| CAMSAP2  | -2.78 | 5.15E-02 |
| ARL4D    | -2.79 | 1.03E-02 |
| KCNQ5    | -2.79 | 3.85E-02 |
| EMILIN1  | -2.79 | 1.72E-02 |
| ACACB    | -2.79 | 1.75E-02 |
| TSHZ1    | -2.80 | 1.58E-03 |
| UICLM    | -2.80 | 4.44E-02 |
| FABP3    | -2.80 | 4.12E-02 |
| ARHGEF39 | -2.80 | 3.16E-02 |
| ARHGAP10 | -2.81 | 3.00E-03 |
| IL23R    | -2.81 | 5.30E-02 |
| SLC45A1  | -2.81 | 5.40E-02 |
| TRAM2    | -2.81 | 5.08E-04 |
| CA5B     | -2.81 | 3.29E-03 |
| INCENP   | -2.81 | 3.25E-02 |
| ZNF568   | -2.81 | 1.63E-02 |
| TCEAL3   | -2.81 | 1.75E-02 |
| SLC39A14 | -2.81 | 2.64E-02 |
| ALKBH8   | -2.82 | 1.48E-02 |

|          |       |          |
|----------|-------|----------|
| GZMM     | -2.82 | 3.77E-03 |
| DGCR8    | -2.82 | 2.95E-03 |
| HHAT     | -2.82 | 3.57E-02 |
| ZNF37BP  | -2.82 | 5.62E-03 |
| CKB      | -2.83 | 1.63E-02 |
| TRAJ54   | -2.83 | 4.30E-02 |
| BCL7A    | -2.84 | 3.25E-03 |
| CXXC5    | -2.84 | 1.29E-03 |
| DHRS11   | -2.84 | 1.27E-02 |
| FFAR4    | -2.85 | 5.00E-02 |
| KCTD15   | -2.85 | 1.63E-02 |
| PLXNA3   | -2.85 | 5.04E-03 |
| ZFP30    | -2.85 | 3.17E-02 |
| DMPK     | -2.85 | 2.16E-02 |
| SAMD10   | -2.85 | 3.63E-03 |
| PLCB1    | -2.85 | 3.43E-03 |
| SLC29A1  | -2.85 | 1.37E-02 |
| RRP1     | -2.85 | 2.11E-04 |
| PORCN    | -2.86 | 1.66E-03 |
| CFL1P1   | -2.86 | 2.86E-02 |
| ADAMTS1  | -2.86 | 4.61E-02 |
| LAT      | -2.86 | 2.47E-02 |
| ZFP92    | -2.86 | 4.82E-02 |
| DPYSL4   | -2.87 | 4.77E-02 |
| LAX1     | -2.87 | 4.31E-03 |
| AZIN2    | -2.87 | 1.81E-02 |
| TRIP10   | -2.88 | 7.08E-03 |
| AGFG2    | -2.88 | 3.35E-04 |
| TKTL1    | -2.88 | 1.02E-02 |
| THRA     | -2.88 | 3.95E-03 |
| PCNT     | -2.89 | 1.59E-03 |
| NLRP7    | -2.89 | 3.83E-02 |
| NHLRC4   | -2.89 | 1.25E-02 |
| IQCK     | -2.89 | 4.49E-02 |
| MSC      | -2.89 | 1.20E-02 |
| HEATR9   | -2.90 | 4.56E-02 |
| ZNF70    | -2.90 | 2.26E-02 |
| BMP8A    | -2.90 | 3.77E-02 |
| DPEP3    | -2.91 | 9.97E-03 |
| LLGL2    | -2.91 | 1.28E-03 |
| NECTIN3  | -2.91 | 4.25E-02 |
| NBPF1    | -2.92 | 4.79E-03 |
| LAS1L    | -2.92 | 2.42E-03 |
| CCNB1IP1 | -2.93 | 5.58E-03 |
| LKAAEAR1 | -2.94 | 4.31E-02 |

|         |       |          |
|---------|-------|----------|
| PELP1   | -2.94 | 1.30E-03 |
| ITGA10  | -2.94 | 4.19E-02 |
| GAN     | -2.94 | 2.47E-02 |
| DDX11   | -2.94 | 1.81E-02 |
| CHST14  | -2.94 | 4.16E-03 |
| PPP2R3B | -2.94 | 3.34E-04 |
| FRMD5   | -2.95 | 3.90E-02 |
| CELSR2  | -2.95 | 4.05E-02 |
| PRAG1   | -2.95 | 1.02E-03 |
| OXER1   | -2.95 | 5.58E-03 |
| ACER1   | -2.95 | 4.03E-02 |
| CRIP3   | -2.95 | 3.51E-02 |
| CD248   | -2.95 | 1.56E-02 |
| TNK1    | -2.95 | 2.47E-03 |
| RADX    | -2.96 | 2.31E-02 |
| SCAI    | -2.96 | 8.10E-03 |
| CCDC65  | -2.96 | 2.15E-02 |
| IFFO2   | -2.96 | 2.95E-03 |
| C1QTNF3 | -2.96 | 4.08E-02 |
| ADAMTS5 | -2.96 | 3.78E-02 |
| EPHB3   | -2.97 | 3.92E-02 |
| CST7    | -2.97 | 2.13E-03 |
| ADGRG1  | -2.97 | 1.54E-02 |
| JMY     | -2.97 | 1.35E-04 |
| TULP4   | -2.97 | 4.11E-04 |
| BMP8B   | -2.97 | 3.57E-02 |
| PCBP4   | -2.97 | 2.52E-03 |
| FBF1    | -2.97 | 6.23E-03 |
| PLB1    | -2.98 | 2.78E-03 |
| DDX12P  | -2.98 | 3.81E-02 |
| ZNF615  | -2.98 | 1.85E-02 |
| JUP     | -2.98 | 8.36E-03 |
| CCDC106 | -2.99 | 4.06E-03 |
| PDP2    | -2.99 | 1.00E-02 |
| LIM2    | -2.99 | 3.76E-02 |
| WDR86   | -2.99 | 1.52E-02 |
| ZDHHC1  | -3.00 | 1.42E-02 |
| HIRIP3  | -3.00 | 2.25E-03 |
| DBP     | -3.00 | 1.02E-03 |
| HAGHL   | -3.00 | 5.24E-03 |
| MC1R    | -3.01 | 1.54E-02 |
| TEAD2   | -3.01 | 3.30E-02 |
| PID1    | -3.01 | 2.37E-03 |
| DEGS2   | -3.01 | 1.71E-02 |
| CAVIN3  | -3.01 | 3.42E-02 |

|          |       |          |
|----------|-------|----------|
| PFN1P2   | -3.02 | 3.78E-02 |
| SCUBE3   | -3.02 | 2.21E-02 |
| CCL5     | -3.02 | 2.17E-03 |
| ZCCHC18  | -3.02 | 2.48E-02 |
| CHTF18   | -3.04 | 1.21E-03 |
| A2M      | -3.04 | 1.85E-02 |
| CRIP1    | -3.05 | 2.07E-03 |
| ESRP2    | -3.05 | 2.70E-02 |
| KCNH3    | -3.05 | 3.15E-03 |
| NMUR1    | -3.05 | 1.51E-02 |
| RASSF1   | -3.05 | 1.49E-03 |
| ZBTB16   | -3.05 | 4.29E-03 |
| ZNF831   | -3.06 | 5.55E-04 |
| OLIG2    | -3.06 | 3.01E-02 |
| DYNC2I1  | -3.06 | 6.69E-03 |
| FALEC    | -3.06 | 3.53E-02 |
| GRAP     | -3.06 | 6.14E-03 |
| IL23A    | -3.06 | 6.60E-03 |
| TOX2     | -3.06 | 1.17E-02 |
| PCYT1B   | -3.07 | 3.12E-02 |
| MLC1     | -3.07 | 7.08E-03 |
| CDAN1    | -3.08 | 8.33E-04 |
| RIMBP3   | -3.08 | 3.38E-02 |
| IGIP     | -3.08 | 2.73E-02 |
| KCNK12   | -3.08 | 2.21E-02 |
| AKT3     | -3.08 | 5.04E-03 |
| KIAA1671 | -3.08 | 3.04E-02 |
| SBK1     | -3.08 | 1.49E-03 |
| NXPH4    | -3.09 | 3.11E-02 |
| GNB1L    | -3.09 | 2.09E-04 |
| L3MBTL4  | -3.10 | 2.88E-02 |
| FGFBP2   | -3.10 | 1.37E-02 |
| OTUD7B   | -3.10 | 1.97E-02 |
| ATOH8    | -3.10 | 3.17E-02 |
| A2MP1    | -3.11 | 3.06E-02 |
| PAK6     | -3.11 | 2.91E-02 |
| CERS4    | -3.11 | 7.66E-04 |
| PLD4     | -3.11 | 3.16E-03 |
| BNC2     | -3.11 | 3.08E-02 |
| SERPINF1 | -3.11 | 2.77E-03 |
| SOX12    | -3.12 | 3.51E-03 |
| ZNF395   | -3.12 | 2.77E-03 |
| ADORA3   | -3.12 | 1.28E-02 |
| ZNF569   | -3.12 | 5.46E-03 |
| CEP250   | -3.13 | 1.59E-03 |

|           |       |          |
|-----------|-------|----------|
| AMIGO1    | -3.13 | 3.95E-03 |
| AGAP9     | -3.13 | 3.14E-02 |
| MYRF      | -3.14 | 2.96E-02 |
| TRAV23DV6 | -3.14 | 2.28E-03 |
| ZBTB4     | -3.15 | 2.48E-05 |
| CA14      | -3.15 | 2.96E-02 |
| EOMES     | -3.15 | 1.72E-03 |
| GPR19     | -3.16 | 2.11E-02 |
| AHNAK     | -3.16 | 1.09E-03 |
| ADGRE4P   | -3.16 | 2.38E-02 |
| NDRG2     | -3.16 | 8.85E-04 |
| FGF17     | -3.16 | 2.92E-02 |
| ALKAL2    | -3.19 | 2.86E-02 |
| OVGP1     | -3.19 | 2.60E-02 |
| KLRB1     | -3.20 | 1.02E-02 |
| PIF1      | -3.20 | 2.60E-02 |
| NINL      | -3.20 | 2.66E-02 |
| AEBP1     | -3.20 | 2.04E-02 |
| BOK       | -3.21 | 1.96E-02 |
| CACNA1I   | -3.21 | 8.54E-03 |
| NBPF3     | -3.22 | 6.89E-03 |
| PYROXD2   | -3.22 | 1.72E-03 |
| RAMP1     | -3.22 | 9.02E-03 |
| ZFP41     | -3.23 | 3.48E-04 |
| TMEM8B    | -3.23 | 2.42E-03 |
| C17orf50  | -3.23 | 2.59E-02 |
| ZNF316    | -3.23 | 8.70E-03 |
| SMPD3     | -3.23 | 2.98E-03 |
| SNAPC4    | -3.24 | 8.33E-04 |
| CHD1L     | -3.24 | 2.32E-02 |
| FBXW4P1   | -3.24 | 8.36E-03 |
| FOCAD     | -3.25 | 6.09E-05 |
| CD163     | -3.26 | 4.53E-03 |
| ABCA17P   | -3.26 | 1.96E-02 |
| SLC16A11  | -3.26 | 1.37E-02 |
| SGSM1     | -3.27 | 2.20E-02 |
| HES1      | -3.27 | 1.14E-02 |
| SLC4A4    | -3.27 | 1.50E-02 |
| CNFN      | -3.27 | 1.35E-02 |
| MAMSTR    | -3.28 | 1.21E-02 |
| ZP3       | -3.28 | 7.56E-03 |
| REEP6     | -3.28 | 4.66E-03 |
| TAGLN     | -3.28 | 3.57E-03 |
| KRT8P34   | -3.29 | 1.68E-02 |
| ZHX3      | -3.29 | 2.73E-03 |

|           |       |          |
|-----------|-------|----------|
| GOLGA8B   | -3.30 | 1.67E-03 |
| MIAT      | -3.30 | 4.27E-03 |
| HYAL1     | -3.31 | 8.06E-03 |
| GTF3C1    | -3.32 | 1.63E-05 |
| PMP22     | -3.32 | 1.81E-02 |
| WNT5B     | -3.33 | 1.17E-02 |
| ALOX15    | -3.33 | 1.73E-02 |
| CPAMD8    | -3.34 | 3.81E-03 |
| S1PR5     | -3.34 | 3.99E-03 |
| SLC25A15  | -3.34 | 2.95E-03 |
| SIGLEC17P | -3.34 | 5.03E-03 |
| SALL2     | -3.34 | 2.12E-02 |
| NOG       | -3.35 | 9.66E-03 |
| C13orf46  | -3.35 | 8.71E-03 |
| ENGASE    | -3.35 | 7.17E-05 |
| PRSS57    | -3.37 | 1.17E-02 |
| UNC119B   | -3.38 | 2.36E-04 |
| CROCC     | -3.38 | 6.74E-03 |
| SORBS3    | -3.38 | 1.49E-04 |
| ALS2CL    | -3.38 | 1.57E-03 |
| ANO8      | -3.38 | 1.79E-02 |
| PPP1R37   | -3.39 | 8.21E-03 |
| BAIAP2    | -3.39 | 8.06E-04 |
| PIK3C2B   | -3.41 | 3.41E-03 |
| CASC19    | -3.41 | 1.78E-02 |
| SLC9A5    | -3.41 | 1.51E-02 |
| TIPIN     | -3.41 | 1.09E-02 |
| GLB1L2    | -3.41 | 1.76E-02 |
| FBL       | -3.41 | 7.14E-04 |
| GIPR      | -3.42 | 1.87E-02 |
| NTHL1     | -3.42 | 4.56E-04 |
| AMOTL1    | -3.43 | 1.80E-02 |
| ASB2      | -3.43 | 2.91E-03 |
| CABP4     | -3.43 | 1.69E-02 |
| BAIAP3    | -3.44 | 3.55E-03 |
| TRAJ49    | -3.44 | 1.60E-02 |
| SLFN12L   | -3.44 | 6.20E-03 |
| ASPH      | -3.46 | 2.67E-04 |
| LYNX1     | -3.46 | 1.76E-02 |
| SPEF2     | -3.46 | 6.91E-03 |
| TFAP4     | -3.46 | 7.36E-03 |
| LRFN3     | -3.47 | 3.66E-03 |
| PALLD     | -3.48 | 2.55E-03 |
| MRPL45P2  | -3.49 | 5.62E-03 |
| PARTICL   | -3.49 | 1.51E-02 |

|          |       |          |
|----------|-------|----------|
| DUSP8    | -3.49 | 7.56E-03 |
| SPON1    | -3.50 | 1.39E-02 |
| PKD1P6   | -3.50 | 9.99E-03 |
| ABLIM2   | -3.51 | 1.37E-02 |
| BMP1     | -3.51 | 9.35E-03 |
| SFRP5    | -3.51 | 1.42E-02 |
| SLC25A10 | -3.52 | 6.14E-03 |
| SLC29A2  | -3.52 | 2.75E-03 |
| EBF4     | -3.52 | 1.45E-02 |
| LGR6     | -3.53 | 6.67E-03 |
| TDRD9    | -3.54 | 1.51E-02 |
| ACYP1    | -3.55 | 8.43E-03 |
| C11orf95 | -3.56 | 1.51E-02 |
| MKS1     | -3.57 | 9.17E-05 |
| CXCR6    | -3.57 | 2.95E-03 |
| PIGZ     | -3.58 | 1.21E-02 |
| ENG      | -3.58 | 1.27E-04 |
| CLIC3    | -3.58 | 4.26E-03 |
| PHLDB3   | -3.58 | 4.07E-03 |
| C15orf62 | -3.59 | 1.46E-02 |
| MATK     | -3.59 | 1.02E-03 |
| SPRY1    | -3.60 | 4.28E-03 |
| GPRASP1  | -3.61 | 8.69E-03 |
| GPA33    | -3.62 | 9.96E-04 |
| GNLY     | -3.64 | 2.66E-03 |
| C9orf106 | -3.64 | 1.66E-03 |
| C16orf74 | -3.64 | 2.66E-03 |
| DOC2GP   | -3.65 | 1.00E-02 |
| SDK2     | -3.65 | 8.29E-03 |
| TPPP3    | -3.66 | 2.30E-03 |
| GSDME    | -3.66 | 8.29E-03 |
| EEF2K    | -3.66 | 5.78E-04 |
| SKI      | -3.67 | 3.70E-03 |
| SERPINF2 | -3.67 | 8.27E-03 |
| CALY     | -3.67 | 1.25E-02 |
| NPHP4    | -3.68 | 2.90E-03 |
| PLXND1   | -3.68 | 4.69E-04 |
| AMOT     | -3.69 | 1.20E-02 |
| ETNK2    | -3.70 | 1.06E-02 |
| GSTM2    | -3.70 | 1.41E-03 |
| PWWP3A   | -3.70 | 6.60E-07 |
| TRAJ41   | -3.71 | 9.99E-03 |
| TAMALIN  | -3.72 | 1.16E-03 |
| AXIN2    | -3.73 | 4.70E-03 |
| HABP4    | -3.73 | 2.36E-04 |



|          |       |          |
|----------|-------|----------|
| EVA1C    | -3.74 | 4.00E-04 |
| FOXO3B   | -3.74 | 1.14E-03 |
| SCRT2    | -3.74 | 1.08E-02 |
| PZP      | -3.74 | 7.79E-03 |
| TRAF3IP1 | -3.75 | 1.01E-03 |
| IQCC     | -3.75 | 9.55E-03 |
| COL6A2   | -3.76 | 1.29E-03 |
| RDH10    | -3.76 | 7.13E-03 |
| LZTS3    | -3.77 | 1.03E-02 |
| PAIP2B   | -3.77 | 6.70E-03 |
| SDC2     | -3.77 | 7.96E-03 |
| KANK3    | -3.80 | 2.93E-03 |
| SPTAN1   | -3.80 | 1.14E-04 |
| KLHL32   | -3.80 | 9.69E-03 |
| MPP2     | -3.81 | 8.76E-03 |
| SPOCK2   | -3.83 | 1.26E-05 |
| ABCA2    | -3.83 | 1.09E-04 |
| ITPRIPL1 | -3.83 | 1.06E-03 |
| L2HGDH   | -3.84 | 4.32E-03 |
| WNT10B   | -3.87 | 8.95E-03 |
| PRSS33   | -3.87 | 6.73E-03 |
| PODXL2   | -3.88 | 3.92E-03 |
| SCNN1D   | -3.92 | 7.36E-03 |
| ZNF233   | -3.92 | 7.36E-03 |
| CERCAM   | -3.92 | 4.89E-03 |
| KRI1     | -3.92 | 1.14E-03 |
| LYPD2    | -3.96 | 6.20E-03 |
| GALNT12  | -3.97 | 8.33E-04 |
| CCDC136  | -3.98 | 7.36E-03 |
| FGFBP3   | -4.00 | 2.75E-03 |
| FEZ1     | -4.01 | 3.70E-03 |
| FANCB    | -4.02 | 7.09E-03 |
| ZSCAN12  | -4.07 | 3.66E-03 |
| CAND2    | -4.08 | 5.58E-03 |
| CCR12P   | -4.08 | 3.91E-03 |
| AKAP5    | -4.11 | 6.08E-03 |
| TUBB4A   | -4.12 | 2.61E-03 |
| NRG1     | -4.13 | 4.22E-03 |
| ZNF470   | -4.13 | 4.66E-03 |
| ZNF575   | -4.14 | 3.55E-04 |
| SPIRE1   | -4.14 | 4.49E-03 |
| KBTBD11  | -4.15 | 1.09E-04 |
| SCD5     | -4.17 | 5.03E-03 |
| RPH3A    | -4.19 | 2.96E-03 |
| DCHS1    | -4.20 | 1.59E-03 |

|           |       |          |
|-----------|-------|----------|
| ADAMTS7P1 | -4.21 | 2.90E-03 |
| SLC26A11  | -4.23 | 5.88E-05 |
| DLG5      | -4.25 | 4.73E-03 |
| ICA1L     | -4.26 | 2.73E-03 |
| CROCC2    | -4.26 | 4.77E-03 |
| ABCC5     | -4.27 | 1.68E-04 |
| PDE4DIPP2 | -4.29 | 1.01E-03 |
| SOWAHC    | -4.29 | 4.64E-03 |
| IGFBP6    | -4.29 | 3.55E-03 |
| IL5RA     | -4.29 | 1.01E-03 |
| WDR27     | -4.30 | 8.58E-04 |
| CSNK1E    | -4.31 | 1.51E-04 |
| PHLDB2    | -4.35 | 2.30E-03 |
| OLFM2     | -4.44 | 1.18E-04 |
| LTC4S     | -4.44 | 1.06E-03 |
| COL19A1   | -4.45 | 6.44E-04 |
| ZNF571    | -4.45 | 2.42E-03 |
| ALMS1     | -4.46 | 3.82E-04 |
| IER5L     | -4.50 | 8.93E-04 |
| HERC2     | -4.53 | 2.65E-04 |
| CERNA1    | -4.54 | 2.73E-03 |
| CA6       | -4.54 | 2.30E-03 |
| RAB3A     | -4.55 | 1.99E-03 |
| TENM1     | -4.57 | 7.90E-04 |
| C12orf60  | -4.57 | 2.56E-03 |
| THBS4     | -4.63 | 2.91E-03 |
| SAMD1     | -4.65 | 1.06E-03 |
| NMB       | -4.71 | 3.35E-04 |
| CEP126    | -4.73 | 1.88E-03 |
| ZNF8      | -4.77 | 4.33E-04 |
| ZGRF1     | -4.84 | 1.81E-03 |
| ADGRG5    | -4.85 | 5.85E-05 |
| MMP11     | -4.86 | 3.55E-04 |
| CCDC163   | -4.86 | 1.36E-03 |
| ENHO      | -4.89 | 9.34E-04 |
| DOK4      | -4.91 | 5.01E-04 |
| ZNF771    | -4.91 | 1.04E-03 |
| MXRA8     | -4.91 | 1.99E-03 |
| VENTX     | -5.12 | 8.33E-04 |
| SH3RF3    | -5.22 | 5.74E-04 |
| SIGLEC8   | -5.25 | 9.35E-04 |
| FXVD7     | -5.28 | 9.34E-04 |
| EXTL2     | -5.28 | 9.38E-04 |
| S100B     | -5.41 | 9.38E-04 |
| OLIG1     | -5.45 | 2.11E-04 |

|         |       |          |
|---------|-------|----------|
| PLCD3   | -5.55 | 8.33E-04 |
| GPSM1   | -5.59 | 5.03E-04 |
| CHIC1   | -5.81 | 6.22E-04 |
| CTSF    | -5.83 | 4.23E-05 |
| PTCH1   | -5.91 | 4.73E-05 |
| PEG13   | -5.97 | 4.85E-04 |
| PDZD4   | -6.07 | 8.53E-05 |
| WNT7A   | -6.32 | 1.18E-04 |
| JAKMIP2 | -6.37 | 1.09E-04 |
| LMLN    | -6.48 | 2.65E-04 |
| SPNS3   | -6.55 | 1.26E-05 |
| SEMA4C  | -7.06 | 6.60E-07 |
